# Supplementary material for: Transcriptomic plasticity of the hypothalamic osmoregulatory control centre of the Arabian dromedary camel
Source: Commun Biol. 2022 Sep 23;5:1008. doi: 10.1038/s42003-022-03857-0 (PMC9508118; doi:10.1038/s42003-022-03857-0)
Supplement: Supplementary file 4 — Supplementary Data S1 [file 42003_2022_3857_MOESM4_ESM.xlsx]

## Sheet: Library information
Library Details
Library Type	Please check as appropriate
Stranded TruSeq Total RNA Seq	15 samples
Species information	Please complete as appropriate
Species	Camelus dromedarius
Lab information
Kit details	Illumina TruSeq Stranded mRNA Library Preparation
Sequencing run concentration	pM
Run concentration, pM	1.4 pM plus 5% PhiX
Sample sheet information
Sample_Name	RIN value	Final average library size, bp (range 100-1000bp)	Fragmentation time, minutes	Total RNA (ng) taken into assay	Illumina RNA adapter	Final library concentration, ng/ul (High Sens Qubit)	Protocol
CON1	6.1	327	4	~200	3	1.44	Illumina TruSeq Total RNA protocol
CON2	5.7	313	4	~200	4	9.53	Illumina TruSeq Total RNA protocol
CON3	6.7	323	4	~200	5	2.11	Illumina TruSeq Total RNA protocol
CON4	6.9	315	4	~200	6	4.09	Illumina TruSeq Total RNA protocol
CON5	6.7	327	4	~200	7	3.08	Illumina TruSeq Total RNA protocol
WD6	5.9	327	4	~200	8	1.64	Illumina TruSeq Total RNA protocol
WD7	7	311	4	~200	9	7.9	Illumina TruSeq Total RNA protocol
WD8	5.5	316	4	~200	11	3.75	Illumina TruSeq Total RNA protocol
WD9	6.8	312	4	~200	12	14	Illumina TruSeq Total RNA protocol
CON13	6.3	274	4	~200	16	3.86	Illumina TruSeq Total RNA protocol
CON14	5.4	285	4	~200	18	2.46	Illumina TruSeq Total RNA protocol
WD15	5.2	281	4	~200	19	8.54	Illumina TruSeq Total RNA protocol
WD16	5.6	264	4	~200	21	6.45	Illumina TruSeq Total RNA protocol
WD17	N/A	403	4	~200	25	0.265	Illumina TruSeq Total RNA protocol
WD-Ribo-1	5.3	255	4	~200	1	0.279	Illumina TruSeq Total RNA protocol
Important notes:
CON: control, WD: water deprived, RH: rehydrated
For duplicated samples (CON1 and CON13; CON2 and CON14; WD6 and WD17), the one with better performance was used in RNAseq and qRT-PCR.
Sample CON2, CON3, CON4, CON5, WD6, WD7, WD8, WD9, CON13 and WD15 (averaged RIN=6.27) passed the QC check and used in downstream RNAseq and qRT-PCR.
