# Supplementary material for: Transcriptomic plasticity of the hypothalamic osmoregulatory control centre of the Arabian dromedary camel
Source: Commun Biol. 2022 Sep 23;5:1008. doi: 10.1038/s42003-022-03857-0 (PMC9508118; doi:10.1038/s42003-022-03857-0)
Supplement: Supplementary file 6 — Supplementary Data S3 [file 42003_2022_3857_MOESM6_ESM.xlsx]

## Sheet: a
Classification of camel SON basal genes - transcription factors
human_ortholog_name	camel_external_gene_names	camel_ensembl_ids	camel_gene_description
SON	SON	ENSCDRG00005002558	SON DNA binding protein [Source:HGNC Symbol;Acc:HGNC:11183]
ARNT2	ARNT2	ENSCDRG00005017654	aryl hydrocarbon receptor nuclear translocator 2 [Source:NCBI gene;Acc:105094743]
KMT2A	ENSCDRG00005020014	ENSCDRG00005020014	lysine methyltransferase 2A [Source:NCBI gene;Acc:105090168]
ASH1L	ASH1L	ENSCDRG00005008672	ASH1 like histone lysine methyltransferase [Source:NCBI gene;Acc:105088782]
NFE2L1	NFE2L1	ENSCDRG00005018357	nuclear factor, erythroid 2 like 1 [Source:NCBI gene;Acc:105106961]
SRCAP	ENSCDRG00005010593	ENSCDRG00005010593	nan
TSC22D1	TSC22D1	ENSCDRG00005008565	TSC22 domain family member 1 [Source:NCBI gene;Acc:105089760]
ARHGAP35	ARHGAP35	ENSCDRG00005000613	Rho GTPase activating protein 35 [Source:NCBI gene;Acc:105104034]
SALL2	SALL2	ENSCDRG00005002827	spalt like transcription factor 2 [Source:NCBI gene;Acc:105097611]
SREBF2	SREBF2	ENSCDRG00005003590	sterol regulatory element binding transcription factor 2 [Source:HGNC Symbol;Acc:HGNC:11290]
CIC	CIC	ENSCDRG00005017516	capicua transcriptional repressor [Source:HGNC Symbol;Acc:HGNC:14214]
THRA	THRA	ENSCDRG00005006139	thyroid hormone receptor alpha [Source:HGNC Symbol;Acc:HGNC:11796]
SPEN	SPEN	ENSCDRG00005003423	spen family transcriptional repressor [Source:HGNC Symbol;Acc:HGNC:17575]
EPAS1	EPAS1	ENSCDRG00005022302	endothelial PAS domain protein 1 [Source:HGNC Symbol;Acc:HGNC:3374]
GTF2I	GTF2I	ENSCDRG00005017614	general transcription factor IIi [Source:HGNC Symbol;Acc:HGNC:4659]
ZKSCAN1	ZKSCAN1	ENSCDRG00005010091	zinc finger with KRAB and SCAN domains 1 [Source:HGNC Symbol;Acc:HGNC:13101]
ZEB2	ZEB2	ENSCDRG00005021107	zinc finger E-box binding homeobox 2 [Source:HGNC Symbol;Acc:HGNC:14881]
BPTF	BPTF	ENSCDRG00005020556	bromodomain PHD finger transcription factor [Source:HGNC Symbol;Acc:HGNC:3581]
NACC2	NACC2	ENSCDRG00005001900	NACC family member 2 [Source:HGNC Symbol;Acc:HGNC:23846]
MGA	MGA	ENSCDRG00005019811	MAX dimerization protein MGA [Source:NCBI gene;Acc:105096851]
STAT1	STAT1	ENSCDRG00005014842	signal transducer and activator of transcription 1 [Source:NCBI gene;Acc:105088783]
PREB	PREB	ENSCDRG00005007331	prolactin regulatory element binding [Source:HGNC Symbol;Acc:HGNC:9356]
NCOA2	NCOA2	ENSCDRG00005021163	nuclear receptor coactivator 2 [Source:NCBI gene;Acc:105103892]
GLYR1	GLYR1	ENSCDRG00005010438	glyoxylate reductase 1 homolog [Source:NCBI gene;Acc:105099810]
CAMTA2	CAMTA2	ENSCDRG00005013837	calmodulin binding transcription activator 2 [Source:HGNC Symbol;Acc:HGNC:18807]
TCF20	TCF20	ENSCDRG00005004496	transcription factor 20 [Source:HGNC Symbol;Acc:HGNC:11631]
NFIX	NFIX	ENSCDRG00005022174	nuclear factor I X [Source:NCBI gene;Acc:105100761]
CREBL2	CREBL2	ENSCDRG00005010141	cAMP responsive element binding protein like 2 [Source:NCBI gene;Acc:105094244]
BAZ2A	BAZ2A	ENSCDRG00005007803	bromodomain adjacent to zinc finger domain 2A [Source:HGNC Symbol;Acc:HGNC:962]
STAT5B	STAT5B	ENSCDRG00005005157	signal transducer and activator of transcription 5B [Source:HGNC Symbol;Acc:HGNC:11367]
BAZ2B	BAZ2B	ENSCDRG00005001912	bromodomain adjacent to zinc finger domain 2B [Source:HGNC Symbol;Acc:HGNC:963]
MYRF	MYRF	ENSCDRG00005007517	myelin regulatory factor [Source:HGNC Symbol;Acc:HGNC:1181]
SREBF1	SREBF1	ENSCDRG00005020433	sterol regulatory element binding transcription factor 1 [Source:HGNC Symbol;Acc:HGNC:11289]
STAT3	STAT3	ENSCDRG00005005349	signal transducer and activator of transcription 3 [Source:HGNC Symbol;Acc:HGNC:11364]
STAT2	STAT2	ENSCDRG00005006459	signal transducer and activator of transcription 2 [Source:HGNC Symbol;Acc:HGNC:11363]
SIM1	SIM1	ENSCDRG00005014556	SIM bHLH transcription factor 1 [Source:NCBI gene;Acc:105097146]
CAMTA1	CAMTA1	ENSCDRG00005009778	calmodulin binding transcription activator 1 [Source:HGNC Symbol;Acc:HGNC:18806]
KDM2A	KDM2A	ENSCDRG00005012715	lysine demethylase 2A [Source:NCBI gene;Acc:105104438]
BBX	BBX	ENSCDRG00005000736	BBX high mobility group box domain containing [Source:NCBI gene;Acc:105087704]
NCOA1	NCOA1	ENSCDRG00005008961	nuclear receptor coactivator 1 [Source:NCBI gene;Acc:105100028]
FOSL2	FOSL2	ENSCDRG00005012100	FOS like 2, AP-1 transcription factor subunit [Source:NCBI gene;Acc:105098561]
SALL1	SALL1	ENSCDRG00005001107	spalt like transcription factor 1 [Source:HGNC Symbol;Acc:HGNC:10524]
SGSM2	SGSM2	ENSCDRG00005008444	small G protein signaling modulator 2 [Source:NCBI gene;Acc:105094393]
ZNF292	ZNF292	ENSCDRG00005004134	zinc finger protein 292 [Source:NCBI gene;Acc:105095552]
DZIP1	DZIP1	ENSCDRG00005014697	DAZ interacting zinc finger protein 1 [Source:HGNC Symbol;Acc:HGNC:20908]
XBP1	XBP1	ENSCDRG00005020349	X-box binding protein 1 [Source:HGNC Symbol;Acc:HGNC:12801]
TET2	TET2	ENSCDRG00005014485	tet methylcytosine dioxygenase 2 [Source:NCBI gene;Acc:105089572]
MBNL2	MBNL2	ENSCDRG00005016135	muscleblind like splicing regulator 2 [Source:HGNC Symbol;Acc:HGNC:16746]
SOX8	SOX8	ENSCDRG00005013879	SRY-box transcription factor 8 [Source:HGNC Symbol;Acc:HGNC:11203]
ATF4	ATF4	ENSCDRG00005014461	activating transcription factor 4 [Source:NCBI gene;Acc:105091928]
ZBTB4	ZBTB4	ENSCDRG00005007582	zinc finger and BTB domain containing 4 [Source:HGNC Symbol;Acc:HGNC:23847]
CPEB1	ENSCDRG00005014353	ENSCDRG00005014353	nan
ZNF644	ZNF644	ENSCDRG00005003047	zinc finger protein 644 [Source:NCBI gene;Acc:105085491]
HIVEP2	HIVEP2	ENSCDRG00005011550	HIVEP zinc finger 2 [Source:NCBI gene;Acc:105092057]
PRDM2	PRDM2	ENSCDRG00005019238	PR/SET domain 2 [Source:HGNC Symbol;Acc:HGNC:9347]
NFAT5	NFAT5	ENSCDRG00005019020	nuclear factor of activated T cells 5 [Source:NCBI gene;Acc:105088395]
ZNF483	ZNF483	ENSCDRG00005006538	zinc finger protein 483 [Source:HGNC Symbol;Acc:HGNC:23384]
SAFB	SAFB	ENSCDRG00005021986	scaffold attachment factor B [Source:NCBI gene;Acc:105091756]
ZNF462	ZNF462	ENSCDRG00005011818	zinc finger protein 462 [Source:HGNC Symbol;Acc:HGNC:21684]
ZHX3	ZHX3	ENSCDRG00005009932	zinc fingers and homeoboxes 3 [Source:NCBI gene;Acc:105085025]
FOXP4	FOXP4	ENSCDRG00005016769	forkhead box P4 [Source:HGNC Symbol;Acc:HGNC:20842]
ADNP	ADNP	ENSCDRG00005015515	activity dependent neuroprotector homeobox [Source:HGNC Symbol;Acc:HGNC:15766]
KDM5B	KDM5B	ENSCDRG00005019703	lysine demethylase 5B [Source:NCBI gene;Acc:105105928]
HIF1A	HIF1A	ENSCDRG00005000138	hypoxia inducible factor 1 subunit alpha [Source:HGNC Symbol;Acc:HGNC:4910]
RBSN	RBSN	ENSCDRG00005003390	rabenosyn, RAB effector [Source:NCBI gene;Acc:105093086]
GATAD2A	GATAD2A	ENSCDRG00005011647	GATA zinc finger domain containing 2A [Source:NCBI gene;Acc:105103721]
MEF2D	MEF2D	ENSCDRG00005012987	myocyte enhancer factor 2D [Source:HGNC Symbol;Acc:HGNC:6997]
EEA1	EEA1	ENSCDRG00005020578	early endosome antigen 1 [Source:HGNC Symbol;Acc:HGNC:3185]
TSHZ1	TSHZ1	ENSCDRG00005011569	teashirt zinc finger homeobox 1 [Source:HGNC Symbol;Acc:HGNC:10669]
ZEB1	ZEB1	ENSCDRG00005009025	zinc finger E-box binding homeobox 1 [Source:HGNC Symbol;Acc:HGNC:11642]
SAFB2	SAFB2	ENSCDRG00005021993	scaffold attachment factor B2 [Source:HGNC Symbol;Acc:HGNC:21605]
ZNF609	ZNF609	ENSCDRG00005001141	zinc finger protein 609 [Source:NCBI gene;Acc:105100526]
PHF1	PHF1	ENSCDRG00005021700	PHD finger protein 1 [Source:NCBI gene;Acc:105101381]
SOX10	SOX10	ENSCDRG00005011404	SRY-box transcription factor 10 [Source:NCBI gene;Acc:105091960]
AHDC1	AHDC1	ENSCDRG00005007718	AT-hook DNA binding motif containing 1 [Source:HGNC Symbol;Acc:HGNC:25230]
HMBOX1	HMBOX1	ENSCDRG00005020044	homeobox containing 1 [Source:NCBI gene;Acc:105102036]
AEBP1	AEBP1	ENSCDRG00005010388	AE binding protein 1 [Source:HGNC Symbol;Acc:HGNC:303]
TFE3	TFE3	ENSCDRG00005018293	transcription factor binding to IGHM enhancer 3 [Source:HGNC Symbol;Acc:HGNC:11752]
ZNF335	ZNF335	ENSCDRG00005019473	zinc finger protein 335 [Source:HGNC Symbol;Acc:HGNC:15807]
RBCK1	RBCK1	ENSCDRG00005014608	RANBP2-type and C3HC4-type zinc finger containing 1 [Source:NCBI gene;Acc:105100807]
MEF2A	MEF2A	ENSCDRG00005019509	myocyte enhancer factor 2A [Source:HGNC Symbol;Acc:HGNC:6993]
TCF4	TCF4	ENSCDRG00005020285	transcription factor 4 [Source:NCBI gene;Acc:105103593]
ZNF512B	ZNF512B	ENSCDRG00005011668	zinc finger protein 512B [Source:HGNC Symbol;Acc:HGNC:29212]
CCDC17	ENSCDRG00005018390	ENSCDRG00005018390	nan
KAT7	KAT7	ENSCDRG00005010423	lysine acetyltransferase 7 [Source:NCBI gene;Acc:105104831]
ZNF615	ZNF615	ENSCDRG00005000768	zinc finger protein 615-like [Source:NCBI gene;Acc:105092007]
ZBTB11	ZBTB11	ENSCDRG00005001346	zinc finger and BTB domain containing 11 [Source:NCBI gene;Acc:105087717]
ZBTB20	ZBTB20	ENSCDRG00005012830	zinc finger and BTB domain containing 20 [Source:HGNC Symbol;Acc:HGNC:13503]
ZNF207	ENSCDRG00005018176	ENSCDRG00005018176	nan
FLYWCH1	FLYWCH1	ENSCDRG00005017868	FLYWCH-type zinc finger 1 [Source:HGNC Symbol;Acc:HGNC:25404]
TMF1	TMF1	ENSCDRG00005021118	TATA element modulatory factor 1 [Source:HGNC Symbol;Acc:HGNC:11870]
ZBTB38	ZBTB38	ENSCDRG00005008946	zinc finger and BTB domain containing 38 [Source:NCBI gene;Acc:105086319]
HMG20A	HMG20A	ENSCDRG00005003690	high mobility group 20A [Source:NCBI gene;Acc:105087232]
ZNF423	ZNF423	ENSCDRG00005000552	zinc finger protein 423 [Source:NCBI gene;Acc:105097533]
PIN1	PIN1	ENSCDRG00005004410	peptidylprolyl cis/trans isomerase, NIMA-interacting 1 [Source:NCBI gene;Acc:105087652]
SKI	SKI	ENSCDRG00005012025	SKI proto-oncogene [Source:HGNC Symbol;Acc:HGNC:10896]
CXXC5	CXXC5	ENSCDRG00005000252	CXXC finger protein 5 [Source:NCBI gene;Acc:105098115]
MLXIP	MLXIP	ENSCDRG00005020700	MLX interacting protein [Source:NCBI gene;Acc:105102521]
NCOA3	NCOA3	ENSCDRG00005011940	nuclear receptor coactivator 3 [Source:HGNC Symbol;Acc:HGNC:7670]
TEF	TEF	ENSCDRG00005017170	TEF transcription factor, PAR bZIP family member [Source:HGNC Symbol;Acc:HGNC:11722]
USF2	USF2	ENSCDRG00005007447	upstream transcription factor 2, c-fos interacting [Source:HGNC Symbol;Acc:HGNC:12594]
ZNF512	ZNF512	ENSCDRG00005010850	zinc finger protein 512 [Source:HGNC Symbol;Acc:HGNC:29380]
DMTF1	DMTF1	ENSCDRG00005020209	cyclin D binding myb like transcription factor 1 [Source:NCBI gene;Acc:105087354]
DNMT1	DNMT1	ENSCDRG00005006428	DNA methyltransferase 1 [Source:NCBI gene;Acc:105087645]
MNT	MNT	ENSCDRG00005008357	MAX network transcriptional repressor [Source:HGNC Symbol;Acc:HGNC:7188]
ZNF84	ZNF84	ENSCDRG00005019801	zinc finger protein 140 [Source:NCBI gene;Acc:105101626]
OTP	OTP	ENSCDRG00005000470	orthopedia homeobox [Source:HGNC Symbol;Acc:HGNC:8518]
MYT1	MYT1	ENSCDRG00005013121	myelin transcription factor 1 [Source:HGNC Symbol;Acc:HGNC:7622]
TRPS1	TRPS1	ENSCDRG00005021761	transcriptional repressor GATA binding 1 [Source:HGNC Symbol;Acc:HGNC:12340]
ZFP92	ZFP92	ENSCDRG00005020817	ZFP92 zinc finger protein [Source:HGNC Symbol;Acc:HGNC:12865]
ZNF687	ZNF687	ENSCDRG00005009965	zinc finger protein 687 [Source:NCBI gene;Acc:105103214]
ZNF532	ZNF532	ENSCDRG00005019327	zinc finger protein 532 [Source:NCBI gene;Acc:105088986]
AHCTF1	AHCTF1	ENSCDRG00005008653	AT-hook containing transcription factor 1 [Source:NCBI gene;Acc:105099550]
CSRNP2	CSRNP2	ENSCDRG00005003407	cysteine and serine rich nuclear protein 2 [Source:NCBI gene;Acc:105107149]
ZNF536	ZNF536	ENSCDRG00005021564	zinc finger protein 536 [Source:HGNC Symbol;Acc:HGNC:29025]
WIZ	WIZ	ENSCDRG00005003674	WIZ zinc finger [Source:HGNC Symbol;Acc:HGNC:30917]
GPBP1	GPBP1	ENSCDRG00005005650	GC-rich promoter binding protein 1 [Source:HGNC Symbol;Acc:HGNC:29520]
FOXJ3	FOXJ3	ENSCDRG00005015630	forkhead box J3 [Source:NCBI gene;Acc:105105490]
MBD1	MBD1	ENSCDRG00005010072	methyl-CpG binding domain protein 1 [Source:HGNC Symbol;Acc:HGNC:6916]
PHF20	PHF20	ENSCDRG00005016429	PHD finger protein 20 [Source:HGNC Symbol;Acc:HGNC:16098]
MAZ	ENSCDRG00005012130	ENSCDRG00005012130	nan
ZNF592	ZNF592	ENSCDRG00005013741	zinc finger protein 592 [Source:NCBI gene;Acc:105094710]
AKNA	AKNA	ENSCDRG00005015117	AT-hook transcription factor [Source:NCBI gene;Acc:105103751]
CDC5L	CDC5L	ENSCDRG00005016628	cell division cycle 5 like [Source:NCBI gene;Acc:105088644]
POU6F1	POU6F1	ENSCDRG00005014094	POU class 6 homeobox 1 [Source:HGNC Symbol;Acc:HGNC:9224]
TCF12	TCF12	ENSCDRG00005013440	transcription factor 12 [Source:NCBI gene;Acc:105088665]
ZNF658	ZNF658	ENSCDRG00005008909	zinc finger protein 658 [Source:NCBI gene;Acc:105104714]
ZNF318	ZNF318	ENSCDRG00005013778	zinc finger protein 318 [Source:HGNC Symbol;Acc:HGNC:13578]
FOXK1	FOXK1	ENSCDRG00005018700	forkhead box K1 [Source:HGNC Symbol;Acc:HGNC:23480]
DOT1L	DOT1L	ENSCDRG00005010124	DOT1 like histone lysine methyltransferase [Source:HGNC Symbol;Acc:HGNC:24948]
ZNF608	ZNF608	ENSCDRG00005004125	zinc finger protein 608 [Source:HGNC Symbol;Acc:HGNC:29238]
NR2C2	NR2C2	ENSCDRG00005003539	nuclear receptor subfamily 2 group C member 2 [Source:NCBI gene;Acc:105093083]
THRB	THRB	ENSCDRG00005003618	thyroid hormone receptor beta [Source:NCBI gene;Acc:105095623]
CTCF	CTCF	ENSCDRG00005013383	CCCTC-binding factor [Source:NCBI gene;Acc:105088439]
NFIC	NFIC	ENSCDRG00005006280	nuclear factor I C [Source:HGNC Symbol;Acc:HGNC:7786]
TET3	TET3	ENSCDRG00005005658	tet methylcytosine dioxygenase 3 [Source:HGNC Symbol;Acc:HGNC:28313]
NR1H2	NR1H2	ENSCDRG00005012723	nuclear receptor subfamily 1 group H member 2 [Source:HGNC Symbol;Acc:HGNC:7965]
ZNF154	ENSCDRG00005006160	ENSCDRG00005006160	nan
HSF1	HSF1	ENSCDRG00005016892	heat shock transcription factor 1 [Source:HGNC Symbol;Acc:HGNC:5224]
ATF2	ATF2	ENSCDRG00005002159	activating transcription factor 2 [Source:NCBI gene;Acc:105097571]
ZNF445	ZNF445	ENSCDRG00005004103	zinc finger protein 445 [Source:NCBI gene;Acc:105091314]
FOXP1	FOXP1	ENSCDRG00005003812	forkhead box P1 [Source:NCBI gene;Acc:105095267]
HIVEP3	HIVEP3	ENSCDRG00005015500	HIVEP zinc finger 3 [Source:HGNC Symbol;Acc:HGNC:13561]
SNAPC4	SNAPC4	ENSCDRG00005001573	small nuclear RNA activating complex polypeptide 4 [Source:HGNC Symbol;Acc:HGNC:11137]
KCNIP3	KCNIP3	ENSCDRG00005020036	potassium voltage-gated channel interacting protein 3 [Source:NCBI gene;Acc:105092889]
ATMIN	ATMIN	ENSCDRG00005016854	ATM interactor [Source:HGNC Symbol;Acc:HGNC:29034]
ZZZ3	ZZZ3	ENSCDRG00005013030	zinc finger ZZ-type containing 3 [Source:NCBI gene;Acc:105096661]
NFX1	NFX1	ENSCDRG00005020552	nuclear transcription factor, X-box binding 1 [Source:HGNC Symbol;Acc:HGNC:7803]
NR2F1	NR2F1	ENSCDRG00005014004	nuclear receptor subfamily 2 group F member 1 [Source:HGNC Symbol;Acc:HGNC:7975]
NFIA	NFIA	ENSCDRG00005015494	nuclear factor I A [Source:HGNC Symbol;Acc:HGNC:7784]
DEAF1	DEAF1	ENSCDRG00005008418	DEAF1 transcription factor [Source:HGNC Symbol;Acc:HGNC:14677]
MSANTD4	MSANTD4	ENSCDRG00005002065	Myb/SANT DNA binding domain containing 4 with coiled-coils [Source:NCBI gene;Acc:105095417]
ZNF827	ZNF827	ENSCDRG00005020126	zinc finger protein 827 [Source:NCBI gene;Acc:105091207]
TFCP2	TFCP2	ENSCDRG00005003336	transcription factor CP2 [Source:NCBI gene;Acc:105107150]
ZNF148	ZNF148	ENSCDRG00005020903	zinc finger protein 148 [Source:NCBI gene;Acc:105101312]
ZFHX3	ENSCDRG00005006582	ENSCDRG00005006582	nan
ZNF280D	ENSCDRG00005013979	ENSCDRG00005013979	nan
ZNF358	ZNF358	ENSCDRG00005016504	zinc finger protein 358 [Source:HGNC Symbol;Acc:HGNC:16838]
ZHX1	ZHX1	ENSCDRG00005003624	zinc fingers and homeoboxes 1 [Source:HGNC Symbol;Acc:HGNC:12871]
NR1D2	NR1D2	ENSCDRG00005003553	nuclear receptor subfamily 1 group D member 2 [Source:HGNC Symbol;Acc:HGNC:7963]
PA2G4	ENSCDRG00005005523	ENSCDRG00005005523	proliferation-associated 2G4 [Source:NCBI gene;Acc:105086378]
ZNF629	ZNF629	ENSCDRG00005011465	zinc finger protein 629 [Source:HGNC Symbol;Acc:HGNC:29008]
BHLHE22	BHLHE22	ENSCDRG00005020705	basic helix-loop-helix family member e22 [Source:HGNC Symbol;Acc:HGNC:11963]
ZNF219	ZNF219	ENSCDRG00005002334	zinc finger protein 219 [Source:HGNC Symbol;Acc:HGNC:13011]
MEF2C	MEF2C	ENSCDRG00005014686	myocyte enhancer factor 2C [Source:NCBI gene;Acc:105099639]
ETV3	ETV3	ENSCDRG00005016674	ETS variant transcription factor 3 [Source:NCBI gene;Acc:105105622]
TERF2	TERF2	ENSCDRG00005018671	telomeric repeat binding factor 2 [Source:HGNC Symbol;Acc:HGNC:11729]
ZBTB47	ZBTB47	ENSCDRG00005020517	zinc finger and BTB domain containing 47 [Source:HGNC Symbol;Acc:HGNC:26955]
ZNF407	ENSCDRG00005011659	ENSCDRG00005011659	nan
NR3C1	NR3C1	ENSCDRG00005007211	nuclear receptor subfamily 3 group C member 1 [Source:NCBI gene;Acc:105090816]
ZBTB16	ZBTB16	ENSCDRG00005014980	zinc finger and BTB domain containing 16 [Source:NCBI gene;Acc:105091728]
KLF9	KLF9	ENSCDRG00005001803	Kruppel like factor 9 [Source:NCBI gene;Acc:105106044]
RELA	RELA	ENSCDRG00005004662	RELA proto-oncogene, NF-kB subunit [Source:HGNC Symbol;Acc:HGNC:9955]
ZNF451	ZNF451	ENSCDRG00005017995	zinc finger protein 451 [Source:NCBI gene;Acc:105105747]
ZBTB7A	ZBTB7A	ENSCDRG00005004798	zinc finger and BTB domain containing 7A [Source:HGNC Symbol;Acc:HGNC:18078]
LCOR	LCOR	ENSCDRG00005008609	ligand dependent nuclear receptor corepressor [Source:HGNC Symbol;Acc:HGNC:29503]
NFE2L2	NFE2L2	ENSCDRG00005002588	nuclear factor, erythroid 2 like 2 [Source:NCBI gene;Acc:105098504]
PATZ1	PATZ1	ENSCDRG00005011451	POZ/BTB and AT hook containing zinc finger 1 [Source:NCBI gene;Acc:105099423]
SP140	ENSCDRG00005005120	ENSCDRG00005005120	nan
ZNF804A	ZNF804A	ENSCDRG00005008227	zinc finger protein 804A [Source:HGNC Symbol;Acc:HGNC:21711]
REPIN1	REPIN1	ENSCDRG00005007691	replication initiator 1 [Source:HGNC Symbol;Acc:HGNC:17922]
MECP2	MECP2	ENSCDRG00005011374	methyl-CpG binding protein 2 [Source:HGNC Symbol;Acc:HGNC:6990]
RLF	RLF	ENSCDRG00005013887	rearranged L-myc fusion [Source:NCBI gene;Acc:105103371]
ZNF169	ZNF169	ENSCDRG00005008737	zinc finger protein 169 [Source:HGNC Symbol;Acc:HGNC:12957]
KDM2B	KDM2B	ENSCDRG00005018719	lysine demethylase 2B [Source:NCBI gene;Acc:105102511]
IRF8	IRF8	ENSCDRG00005010228	interferon regulatory factor 8 [Source:HGNC Symbol;Acc:HGNC:5358]
MYT1L	MYT1L	ENSCDRG00005014272	myelin transcription factor 1 like
ARID2	ARID2	ENSCDRG00005013876	AT-rich interaction domain 2 [Source:HGNC Symbol;Acc:HGNC:18037]
THYN1	THYN1	ENSCDRG00005015779	thymocyte nuclear protein 1 [Source:NCBI gene;Acc:105104226]
CEBPZ	CEBPZ	ENSCDRG00005017460	CCAAT enhancer binding protein zeta [Source:NCBI gene;Acc:105103634]
ZBTB40	ZBTB40	ENSCDRG00005014228	zinc finger and BTB domain containing 40 [Source:NCBI gene;Acc:105088870]
MYSM1	MYSM1	ENSCDRG00005014258	Myb like, SWIRM and MPN domains 1 [Source:HGNC Symbol;Acc:HGNC:29401]
ZNF800	ZNF800	ENSCDRG00005005568	zinc finger protein 800 [Source:HGNC Symbol;Acc:HGNC:27267]
TET1	TET1	ENSCDRG00005017530	tet methylcytosine dioxygenase 1 [Source:HGNC Symbol;Acc:HGNC:29484]
PPARD	PPARD	ENSCDRG00005008667	peroxisome proliferator activated receptor delta [Source:NCBI gene;Acc:105101350]
ZNF25	ZNF25	ENSCDRG00005007335	zinc finger protein 25 [Source:HGNC Symbol;Acc:HGNC:13043]
SP3	SP3	ENSCDRG00005001722	Sp3 transcription factor [Source:HGNC Symbol;Acc:HGNC:11208]
HBP1	HBP1	ENSCDRG00005007314	HMG-box transcription factor 1 [Source:NCBI gene;Acc:105093034]
ZNF24	ZNF24	ENSCDRG00005010453	zinc finger protein 24 [Source:HGNC Symbol;Acc:HGNC:13032]
IRF3	IRF3	ENSCDRG00005008089	interferon regulatory factor 3 [Source:HGNC Symbol;Acc:HGNC:6118]
PBX2	PBX2	ENSCDRG00005021366	PBX homeobox 2 [Source:NCBI gene;Acc:105090845]
SCMH1	SCMH1	ENSCDRG00005015060	Scm polycomb group protein homolog 1 [Source:NCBI gene;Acc:105103387]
ST18	ST18	ENSCDRG00005019658	ST18 C2H2C-type zinc finger transcription factor [Source:HGNC Symbol;Acc:HGNC:18695]
MBD6	MBD6	ENSCDRG00005018960	methyl-CpG binding domain protein 6 [Source:HGNC Symbol;Acc:HGNC:20445]
ZKSCAN8	ZKSCAN8	ENSCDRG00005005871	zinc finger with KRAB and SCAN domains 8 [Source:NCBI gene;Acc:105084554]
LCORL	LCORL	ENSCDRG00005019406	ligand dependent nuclear receptor corepressor like [Source:HGNC Symbol;Acc:HGNC:30776]
ATF6B	ATF6B	ENSCDRG00005021251	activating transcription factor 6 beta [Source:NCBI gene;Acc:105090854]
ZNF236	ZNF236	ENSCDRG00005011227	zinc finger protein 236 [Source:HGNC Symbol;Acc:HGNC:13028]
RFX2	RFX2	ENSCDRG00005021955	regulatory factor X2 [Source:HGNC Symbol;Acc:HGNC:9983]
RXRB	RXRB	ENSCDRG00005021632	retinoid X receptor beta [Source:HGNC Symbol;Acc:HGNC:10478]
RFX7	RFX7	ENSCDRG00005014343	regulatory factor X7 [Source:HGNC Symbol;Acc:HGNC:25777]
HNF1A	HNF1A	ENSCDRG00005019223	HNF1 homeobox A [Source:HGNC Symbol;Acc:HGNC:11621]
SP1	SP1	ENSCDRG00005005074	Sp1 transcription factor [Source:HGNC Symbol;Acc:HGNC:11205]
ZFP91	ENSCDRG00005000790	ENSCDRG00005000790	ZFP91 zinc finger protein [Source:NCBI gene;Acc:105094926]
CSRNP3	CSRNP3	ENSCDRG00005005352	cysteine and serine rich nuclear protein 3 [Source:HGNC Symbol;Acc:HGNC:30729]
VEZF1	VEZF1	ENSCDRG00005022148	vascular endothelial zinc finger 1 [Source:NCBI gene;Acc:105097797]
ZNF628	ZNF628	ENSCDRG00005008256	zinc finger protein 628 [Source:HGNC Symbol;Acc:HGNC:28054]
TRAFD1	TRAFD1	ENSCDRG00005019904	TRAF-type zinc finger domain containing 1 [Source:HGNC Symbol;Acc:HGNC:24808]
ZBTB41	ZBTB41	ENSCDRG00005012728	zinc finger and BTB domain containing 41 [Source:NCBI gene;Acc:105090822]
FBXL19	FBXL19	ENSCDRG00005011886	F-box and leucine rich repeat protein 19 [Source:HGNC Symbol;Acc:HGNC:25300]
STAT5A	STAT5A	ENSCDRG00005005218	signal transducer and activator of transcription 5A [Source:HGNC Symbol;Acc:HGNC:11366]
FOXO4	FOXO4	ENSCDRG00005016475	forkhead box O4 [Source:NCBI gene;Acc:105087980]
USF3	USF3	ENSCDRG00005013897	upstream transcription factor family member 3 [Source:NCBI gene;Acc:105093202]
CUX2	CUX2	ENSCDRG00005009444	cut like homeobox 2 [Source:HGNC Symbol;Acc:HGNC:19347]
IRF2	IRF2	ENSCDRG00005015715	interferon regulatory factor 2 [Source:NCBI gene;Acc:105084432]
SETDB1	SETDB1	ENSCDRG00005018003	SET domain bifurcated histone lysine methyltransferase 1 [Source:NCBI gene;Acc:105103196]
RBPJ	RBPJ	ENSCDRG00005013306	recombination signal binding protein for immunoglobulin kappa J region [Source:HGNC Symbol;Acc:HGNC:5724]
NPAS2	NPAS2	ENSCDRG00005017274	neuronal PAS domain protein 2 [Source:HGNC Symbol;Acc:HGNC:7895]
ZNF543	ENSCDRG00005012986	ENSCDRG00005012986	nan
ZNF428	ZNF428	ENSCDRG00005005437	zinc finger protein 428 [Source:HGNC Symbol;Acc:HGNC:20804]
PHF21A	PHF21A	ENSCDRG00005011242	PHD finger protein 21A [Source:HGNC Symbol;Acc:HGNC:24156]
ETV6	ETV6	ENSCDRG00005009633	ETS variant transcription factor 6 [Source:HGNC Symbol;Acc:HGNC:3495]
KLF3	KLF3	ENSCDRG00005010297	Kruppel like factor 3 [Source:NCBI gene;Acc:105089349]
DRAP1	DRAP1	ENSCDRG00005017846	DR1 associated protein 1 [Source:NCBI gene;Acc:105102578]
SKIL	SKIL	ENSCDRG00005005548	SKI like proto-oncogene [Source:NCBI gene;Acc:105085956]
MXD1	MXD1	ENSCDRG00005009417	MAX dimerization protein 1 [Source:HGNC Symbol;Acc:HGNC:6761]
PURA	PURA	ENSCDRG00005000128	purine rich element binding protein A [Source:HGNC Symbol;Acc:HGNC:9701]
ZNF518B	ZNF518B	ENSCDRG00005020898	zinc finger protein 518B [Source:NCBI gene;Acc:105085123]
ZNF507	ZNF507	ENSCDRG00005021348	zinc finger protein 507 [Source:NCBI gene;Acc:105096700]
ZNF598	ZNF598	ENSCDRG00005013508	zinc finger protein 598 [Source:HGNC Symbol;Acc:HGNC:28079]
ZNF585B	ENSCDRG00005002031	ENSCDRG00005002031	zinc finger protein 585B [Source:NCBI gene;Acc:105096945]
ETV1	ETV1	ENSCDRG00005004851	ETS variant transcription factor 1 [Source:HGNC Symbol;Acc:HGNC:3490]
SOX13	SOX13	ENSCDRG00005016406	SRY-box transcription factor 13 [Source:NCBI gene;Acc:105098652]
STAT6	STAT6	ENSCDRG00005017051	signal transducer and activator of transcription 6 [Source:NCBI gene;Acc:105098305]
ZNF646	ZNF646	ENSCDRG00005013067	zinc finger protein 646 [Source:HGNC Symbol;Acc:HGNC:29004]
PRR12	ENSCDRG00005007865	ENSCDRG00005007865	nan
TERF1	TERF1	ENSCDRG00005010658	telomeric repeat binding factor 1 [Source:NCBI gene;Acc:105088558]
ZNF664	ZNF664	ENSCDRG00005022355	zinc finger protein 664 [Source:HGNC Symbol;Acc:HGNC:25406]
HIVEP1	HIVEP1	ENSCDRG00005014392	HIVEP zinc finger 1 [Source:HGNC Symbol;Acc:HGNC:4920]
ZNF77	ENSCDRG00005008324	ENSCDRG00005008324	nan
CENPB	CENPB	ENSCDRG00005010663	centromere protein B [Source:HGNC Symbol;Acc:HGNC:1852]
CHCHD3	CHCHD3	ENSCDRG00005001535	coiled-coil-helix-coiled-coil-helix domain containing 3 [Source:NCBI gene;Acc:105085398]
YY1	YY1	ENSCDRG00005002458	YY1 transcription factor [Source:HGNC Symbol;Acc:HGNC:12856]
CXXC1	CXXC1	ENSCDRG00005009892	CXXC finger protein 1 [Source:HGNC Symbol;Acc:HGNC:24343]
KLF15	KLF15	ENSCDRG00005017650	Kruppel like factor 15 [Source:HGNC Symbol;Acc:HGNC:14536]
ARID5B	ENSCDRG00005014544	ENSCDRG00005014544	AT-rich interaction domain 5B [Source:NCBI gene;Acc:105093856]
HEYL	HEYL	ENSCDRG00005012353	hes related family bHLH transcription factor with YRPW motif like [Source:NCBI gene;Acc:105103360]
ZSCAN12	ZSCAN12	ENSCDRG00005006033	zinc finger and SCAN domain containing 12 [Source:HGNC Symbol;Acc:HGNC:13172]
HEY1	HEY1	ENSCDRG00005014340	hes related family bHLH transcription factor with YRPW motif 1 [Source:HGNC Symbol;Acc:HGNC:4880]
BHLHE41	BHLHE41	ENSCDRG00005009146	basic helix-loop-helix family member e41 [Source:HGNC Symbol;Acc:HGNC:16617]
ZNF398	ZNF398	ENSCDRG00005012937	zinc finger protein 398 [Source:HGNC Symbol;Acc:HGNC:18373]
ZFX	ENSCDRG00005021670	ENSCDRG00005021670	zinc finger X-chromosomal protein-like [Source:NCBI gene;Acc:105103495]
NFIB	NFIB	ENSCDRG00005014901	nuclear factor I B [Source:HGNC Symbol;Acc:HGNC:7785]
ZNF18	ZNF18	ENSCDRG00005008936	zinc finger protein 18 [Source:NCBI gene;Acc:105095886]
ELK1	ELK1	ENSCDRG00005016075	ETS transcription factor ELK1 [Source:HGNC Symbol;Acc:HGNC:3321]
POGK	POGK	ENSCDRG00005004914	pogo transposable element derived with KRAB domain [Source:NCBI gene;Acc:105092718]
ZNF384	ZNF384	ENSCDRG00005018592	zinc finger protein 384 [Source:HGNC Symbol;Acc:HGNC:11955]
SETBP1	SETBP1	ENSCDRG00005016013	SET binding protein 1 [Source:HGNC Symbol;Acc:HGNC:15573]
ZNF326	ZNF326	ENSCDRG00005003095	zinc finger protein 326 [Source:NCBI gene;Acc:105085523]
ELF2	ELF2	ENSCDRG00005001499	E74 like ETS transcription factor 2 [Source:NCBI gene;Acc:105087081]
ZNF470	ZNF470	ENSCDRG00005011493	zinc finger protein 470 [Source:NCBI gene;Acc:105098768]
MBD3	MBD3	ENSCDRG00005009596	methyl-CpG binding domain protein 3 [Source:HGNC Symbol;Acc:HGNC:6918]
ZNF654	ZNF654	ENSCDRG00005003253	zinc finger protein 654 [Source:NCBI gene;Acc:105087764]
ATF6	ATF6	ENSCDRG00005018223	activating transcription factor 6 [Source:HGNC Symbol;Acc:HGNC:791]
E2F3	E2F3	ENSCDRG00005018356	E2F transcription factor 3 [Source:HGNC Symbol;Acc:HGNC:3115]
IRF9	IRF9	ENSCDRG00005016598	interferon regulatory factor 9 [Source:NCBI gene;Acc:105102416]
L3MBTL1	ENSCDRG00005011882	ENSCDRG00005011882	nan
ZNF366	ZNF366	ENSCDRG00005003227	zinc finger protein 366 [Source:HGNC Symbol;Acc:HGNC:18316]
MEIS3	MEIS3	ENSCDRG00005001000	Meis homeobox 3 [Source:NCBI gene;Acc:105098920]
CLOCK	CLOCK	ENSCDRG00005002007	clock circadian regulator [Source:HGNC Symbol;Acc:HGNC:2082]
ARNT	ARNT	ENSCDRG00005017808	aryl hydrocarbon receptor nuclear translocator [Source:NCBI gene;Acc:105103194]
JUN	JUN	ENSCDRG00005014307	Jun proto-oncogene, AP-1 transcription factor subunit [Source:HGNC Symbol;Acc:HGNC:6204]
FOXN2	FOXN2	ENSCDRG00005022381	forkhead box N2 [Source:HGNC Symbol;Acc:HGNC:5281]
ZNF436	ZNF436	ENSCDRG00005017814	zinc finger protein 436 [Source:NCBI gene;Acc:105088883]
ZNF16	ZNF16	ENSCDRG00005018675	zinc finger protein 16 [Source:HGNC Symbol;Acc:HGNC:12947]
BCL6	BCL6	ENSCDRG00005007418	BCL6 transcription repressor [Source:HGNC Symbol;Acc:HGNC:1001]
ZNF410	ZNF410	ENSCDRG00005008036	zinc finger protein 410 [Source:NCBI gene;Acc:105086119]
ZFHX2	ENSCDRG00005014496	ENSCDRG00005014496	nan
MXI1	MXI1	ENSCDRG00005006058	MAX interactor 1, dimerization protein [Source:NCBI gene;Acc:105091708]
RREB1	RREB1	ENSCDRG00005009166	ras responsive element binding protein 1 [Source:HGNC Symbol;Acc:HGNC:10449]
ZNF740	ZNF740	ENSCDRG00005005666	zinc finger protein 740 [Source:NCBI gene;Acc:105094573]
AC092835.1	ENSCDRG00005020172	ENSCDRG00005020172	nan
EBF3	EBF3	ENSCDRG00005003771	EBF transcription factor 3 [Source:HGNC Symbol;Acc:HGNC:19087]
ZNF510	ENSCDRG00005017342	ENSCDRG00005017342	nan
SOX6	SOX6	ENSCDRG00005016113	SRY-box transcription factor 6 [Source:NCBI gene;Acc:105086678]
TCF7L2	ENSCDRG00005021239	ENSCDRG00005021239	nan
ZNF250	ZNF250	ENSCDRG00005018650	zinc finger protein 250 [Source:HGNC Symbol;Acc:HGNC:13044]
TTF1	TTF1	ENSCDRG00005004487	transcription termination factor 1 [Source:NCBI gene;Acc:105085174]
ZNF711	ZNF711	ENSCDRG00005021254	zinc finger protein 711 [Source:NCBI gene;Acc:105091813]
ZNF12	ZNF12	ENSCDRG00005017904	zinc finger protein 12 [Source:NCBI gene;Acc:105099390]
FOXO6	FOXO6	ENSCDRG00005015434	forkhead box O6 [Source:HGNC Symbol;Acc:HGNC:24814]
HMGA1	ENSCDRG00005003857	ENSCDRG00005003857	high mobility group AT-hook 1 [Source:NCBI gene;Acc:105101367]
ZNF263	ZNF263	ENSCDRG00005018760	zinc finger protein 263 [Source:NCBI gene;Acc:105099678]
RFX1	RFX1	ENSCDRG00005016416	regulatory factor X1 [Source:HGNC Symbol;Acc:HGNC:9982]
RARA	RARA	ENSCDRG00005007055	retinoic acid receptor alpha [Source:NCBI gene;Acc:105099020]
RFX5	RFX5	ENSCDRG00005010605	regulatory factor X5 [Source:HGNC Symbol;Acc:HGNC:9986]
ZBTB18	ENSCDRG00005013085	ENSCDRG00005013085	nan
ZNF655	ZNF655	ENSCDRG00005011089	zinc finger protein 655 [Source:HGNC Symbol;Acc:HGNC:30899]
ZKSCAN5	ZKSCAN5	ENSCDRG00005011297	zinc finger with KRAB and SCAN domains 5 [Source:NCBI gene;Acc:105099355]
ZNF469	ZNF469	ENSCDRG00005020636	zinc finger protein 469 [Source:HGNC Symbol;Acc:HGNC:23216]
ZFP90	ZFP90	ENSCDRG00005017860	ZFP90 zinc finger protein [Source:HGNC Symbol;Acc:HGNC:23329]
CENPT	CENPT	ENSCDRG00005014640	centromere protein T [Source:NCBI gene;Acc:105088432]
EGR1	EGR1	ENSCDRG00005000981	early growth response 1 [Source:HGNC Symbol;Acc:HGNC:3238]
ZHX2	ZHX2	ENSCDRG00005021859	zinc fingers and homeoboxes 2 [Source:NCBI gene;Acc:105098326]
HOMEZ	HOMEZ	ENSCDRG00005010338	homeobox and leucine zipper encoding [Source:NCBI gene;Acc:105096985]
ZNF317	ZNF317	ENSCDRG00005003880	zinc finger protein 317 [Source:NCBI gene;Acc:105105397]
LEF1	LEF1	ENSCDRG00005012067	lymphoid enhancer binding factor 1 [Source:NCBI gene;Acc:105105289]
HLF	HLF	ENSCDRG00005022099	HLF transcription factor, PAR bZIP family member [Source:HGNC Symbol;Acc:HGNC:4977]
FOXJ2	FOXJ2	ENSCDRG00005021338	forkhead box J2 [Source:HGNC Symbol;Acc:HGNC:24818]
ZNF772	ZNF772	ENSCDRG00005005734	zinc finger protein 772 [Source:NCBI gene;Acc:105105033]
ETS1	ETS1	ENSCDRG00005018815	ETS proto-oncogene 1, transcription factor [Source:NCBI gene;Acc:105094269]
ZNF484	ZNF484	ENSCDRG00005009296	zinc finger protein 484 [Source:HGNC Symbol;Acc:HGNC:23385]
POU2F1	POU2F1	ENSCDRG00005005211	POU class 2 homeobox 1 [Source:NCBI gene;Acc:105092724]
PRDM10	PRDM10	ENSCDRG00005006756	PR/SET domain 10 [Source:HGNC Symbol;Acc:HGNC:13995]
TAL1	TAL1	ENSCDRG00005019418	TAL bHLH transcription factor 1, erythroid differentiation factor [Source:HGNC Symbol;Acc:HGNC:11556]
KLF7	KLF7	ENSCDRG00005016375	Kruppel like factor 7 [Source:NCBI gene;Acc:105093564]
ZNF746	ZNF746	ENSCDRG00005013225	zinc finger protein 746 [Source:HGNC Symbol;Acc:HGNC:21948]
SP2	SP2	ENSCDRG00005018756	Sp2 transcription factor [Source:NCBI gene;Acc:105106954]
NR3C2	NR3C2	ENSCDRG00005019699	nuclear receptor subfamily 3 group C member 2 [Source:HGNC Symbol;Acc:HGNC:7979]
JAZF1	JAZF1	ENSCDRG00005001369	JAZF zinc finger 1 [Source:HGNC Symbol;Acc:HGNC:28917]
RFX3	RFX3	ENSCDRG00005004007	regulatory factor X3 [Source:NCBI gene;Acc:105100275]
AKAP8	AKAP8	ENSCDRG00005003954	A-kinase anchoring protein 8 [Source:HGNC Symbol;Acc:HGNC:378]
PRDM4	PRDM4	ENSCDRG00005016292	PR/SET domain 4 [Source:NCBI gene;Acc:105101075]
ZNF362	ZNF362	ENSCDRG00005021012	zinc finger protein 362 [Source:HGNC Symbol;Acc:HGNC:18079]
ZBED6	ZBED6	ENSCDRG00005016653	zinc finger BED-type containing 6 [Source:NCBI gene;Acc:105098669]
CHAMP1	CHAMP1	ENSCDRG00005012265	chromosome alignment maintaining phosphoprotein 1 [Source:NCBI gene;Acc:105095490]
BACH1	BACH1	ENSCDRG00005001237	BTB domain and CNC homolog 1 [Source:HGNC Symbol;Acc:HGNC:935]
NFATC3	NFATC3	ENSCDRG00005017009	nuclear factor of activated T cells 3 [Source:HGNC Symbol;Acc:HGNC:7777]
SRF	SRF	ENSCDRG00005012609	serum response factor [Source:NCBI gene;Acc:105088616]
ZNF75A	ZNF75A	ENSCDRG00005018947	zinc finger protein 75a [Source:NCBI gene;Acc:105099675]
ZNF365	ZNF365	ENSCDRG00005014646	protein ZNF365 [Source:NCBI gene;Acc:105093858]
ZNF768	ZNF768	ENSCDRG00005010138	zinc finger protein 768 [Source:NCBI gene;Acc:105102735]
ZNF652	ZNF652	ENSCDRG00005016507	zinc finger protein 652 [Source:HGNC Symbol;Acc:HGNC:29147]
GTF2B	GTF2B	ENSCDRG00005014409	general transcription factor IIB [Source:NCBI gene;Acc:105084524]
ZNF397	ZNF397	ENSCDRG00005010610	zinc finger protein 397 [Source:HGNC Symbol;Acc:HGNC:18818]
NR2F2	NR2F2	ENSCDRG00005019929	nuclear receptor subfamily 2 group F member 2 [Source:HGNC Symbol;Acc:HGNC:7976]
PROX1	PROX1	ENSCDRG00005017410	prospero homeobox 1 [Source:NCBI gene;Acc:105099294]
CREB3L2	CREB3L2	ENSCDRG00005002405	cAMP responsive element binding protein 3 like 2 [Source:NCBI gene;Acc:105091622]
ZFAT	ZFAT	ENSCDRG00005007628	zinc finger and AT-hook domain containing [Source:HGNC Symbol;Acc:HGNC:19899]
ZNF804B	ZNF804B	ENSCDRG00005022011	zinc finger protein 804B [Source:NCBI gene;Acc:105087369]
PLAGL1	PLAGL1	ENSCDRG00005009030	PLAG1 like zinc finger 1 [Source:HGNC Symbol;Acc:HGNC:9046]
ZBTB10	ZBTB10	ENSCDRG00005016009	zinc finger and BTB domain containing 10 [Source:HGNC Symbol;Acc:HGNC:30953]
BHLHE40	BHLHE40	ENSCDRG00005007592	basic helix-loop-helix family member e40 [Source:HGNC Symbol;Acc:HGNC:1046]
ZNF518A	ZNF518A	ENSCDRG00005010426	zinc finger protein 518A [Source:HGNC Symbol;Acc:HGNC:29009]
IKZF2	IKZF2	ENSCDRG00005010931	IKAROS family zinc finger 2 [Source:HGNC Symbol;Acc:HGNC:13177]
ATF7	ATF7	ENSCDRG00005004669	activating transcription factor 7 [Source:HGNC Symbol;Acc:HGNC:792]
PCGF2	PCGF2	ENSCDRG00005019798	polycomb group ring finger 2 [Source:HGNC Symbol;Acc:HGNC:12929]
FOXO1	FOXO1	ENSCDRG00005021563	forkhead box O1 [Source:HGNC Symbol;Acc:HGNC:3819]
ZNF568	ZNF568	ENSCDRG00005001703	zinc finger protein 568 [Source:HGNC Symbol;Acc:HGNC:25392]
ZNF605	ZNF605	ENSCDRG00005019500	zinc finger protein 605 [Source:HGNC Symbol;Acc:HGNC:28068]
E4F1	E4F1	ENSCDRG00005015445	E4F transcription factor 1 [Source:HGNC Symbol;Acc:HGNC:3121]
ZNF586 // ZNF562 // ZNF561 // ZNF418	ENSCDRG00005005714	ENSCDRG00005005714	zinc finger protein 501-like [Source:NCBI gene;Acc:105105045]
ZNF710	ZNF710	ENSCDRG00005008912	zinc finger protein 710 [Source:HGNC Symbol;Acc:HGNC:25352]
ETS2	ETS2	ENSCDRG00005007775	ETS proto-oncogene 2, transcription factor [Source:NCBI gene;Acc:105104669]
AKAP8L	AKAP8L	ENSCDRG00005003903	A-kinase anchoring protein 8 like [Source:HGNC Symbol;Acc:HGNC:29857]
ZKSCAN2	ZKSCAN2	ENSCDRG00005005312	zinc finger with KRAB and SCAN domains 2 [Source:HGNC Symbol;Acc:HGNC:25677]
RXRA	RXRA	ENSCDRG00005022298	retinoid X receptor alpha [Source:HGNC Symbol;Acc:HGNC:10477]
ZNF76	ZNF76	ENSCDRG00005008400	zinc finger protein 76 [Source:NCBI gene;Acc:105101352]
NFKB1	NFKB1	ENSCDRG00005016500	nuclear factor kappa B subunit 1 [Source:NCBI gene;Acc:105089560]
ZFP14	ZFP14	ENSCDRG00005001793	zinc finger protein 14 homolog [Source:NCBI gene;Acc:105101193]
GTF2IRD1	GTF2IRD1	ENSCDRG00005018072	GTF2I repeat domain containing 1 [Source:HGNC Symbol;Acc:HGNC:4661]
TCF3	TCF3	ENSCDRG00005009370	transcription factor 3 [Source:HGNC Symbol;Acc:HGNC:11633]
MYNN	MYNN	ENSCDRG00005005165	myoneurin [Source:HGNC Symbol;Acc:HGNC:14955]
CARF	CARF	ENSCDRG00005019098	calcium responsive transcription factor [Source:HGNC Symbol;Acc:HGNC:14435]
NFYC	NFYC	ENSCDRG00005014542	nuclear transcription factor Y subunit gamma [Source:NCBI gene;Acc:105103382]
KCMF1	KCMF1	ENSCDRG00005016907	potassium channel modulatory factor 1 [Source:HGNC Symbol;Acc:HGNC:20589]
ZNF333	ZNF333	ENSCDRG00005013062	zinc finger protein 333 [Source:HGNC Symbol;Acc:HGNC:15624]
HSF2	HSF2	ENSCDRG00005001943	heat shock transcription factor 2 [Source:HGNC Symbol;Acc:HGNC:5225]
ZNF677	ENSCDRG00005001271	ENSCDRG00005001271	zinc finger protein 677-like [Source:NCBI gene;Acc:105091267]
SP100	ENSCDRG00005005170	ENSCDRG00005005170	nan
ANKZF1	ANKZF1	ENSCDRG00005000595	ankyrin repeat and zinc finger peptidyl tRNA hydrolase 1 [Source:HGNC Symbol;Acc:HGNC:25527]
ERF	ENSCDRG00005017683	ENSCDRG00005017683	nan
UBP1	UBP1	ENSCDRG00005012680	upstream binding protein 1 [Source:HGNC Symbol;Acc:HGNC:12507]
GZF1	GZF1	ENSCDRG00005019674	GDNF inducible zinc finger protein 1 [Source:HGNC Symbol;Acc:HGNC:15808]
ZNF875	ZNF875	ENSCDRG00005002063	zinc finger protein 875 [Source:NCBI gene;Acc:105096943]
ZNF197	ZNF197	ENSCDRG00005004238	zinc finger protein 197 [Source:HGNC Symbol;Acc:HGNC:12988]
ZNF667	ZNF667	ENSCDRG00005011161	zinc finger protein 667 [Source:HGNC Symbol;Acc:HGNC:28854]
USF1	USF1	ENSCDRG00005015871	upstream transcription factor 1 [Source:NCBI gene;Acc:105100121]
ZNF408	ZNF408	ENSCDRG00005009244	zinc finger protein 408 [Source:HGNC Symbol;Acc:HGNC:20041]
ZNF205	ZNF205	ENSCDRG00005018681	zinc finger protein 205 [Source:HGNC Symbol;Acc:HGNC:12996]
ZNF48	ZNF48	ENSCDRG00005012859	zinc finger protein 48 [Source:HGNC Symbol;Acc:HGNC:13114]
GLIS3	GLIS3	ENSCDRG00005004109	GLIS family zinc finger 3 [Source:HGNC Symbol;Acc:HGNC:28510]
GMEB1	GMEB1	ENSCDRG00005006797	glucocorticoid modulatory element binding protein 1 [Source:NCBI gene;Acc:105090386]
RORB	RORB	ENSCDRG00005000469	RAR related orphan receptor B [Source:HGNC Symbol;Acc:HGNC:10259]
FOXK2	FOXK2	ENSCDRG00005009467	forkhead box K2 [Source:HGNC Symbol;Acc:HGNC:6036]
ZNF555	ZNF555	ENSCDRG00005008365	zinc finger protein 555 [Source:HGNC Symbol;Acc:HGNC:28382]
ZFPM2	ZFPM2	ENSCDRG00005021070	zinc finger protein, FOG family member 2 [Source:HGNC Symbol;Acc:HGNC:16700]
FEZF2	FEZF2	ENSCDRG00005020488	FEZ family zinc finger 2 [Source:HGNC Symbol;Acc:HGNC:13506]
ZNF189	ZNF189	ENSCDRG00005014278	zinc finger protein 189 [Source:NCBI gene;Acc:105086875]
ZNF623	ZNF623	ENSCDRG00005006881	zinc finger protein 623 [Source:HGNC Symbol;Acc:HGNC:29084]
FOS	FOS	ENSCDRG00005001172	Fos proto-oncogene, AP-1 transcription factor subunit [Source:NCBI gene;Acc:105086086]
ZNF835	ENSCDRG00005001353	ENSCDRG00005001353	nan
ZNF521	ZNF521	ENSCDRG00005017464	zinc finger protein 521 [Source:NCBI gene;Acc:105086565]
AEBP2	AEBP2	ENSCDRG00005017999	AE binding protein 2 [Source:HGNC Symbol;Acc:HGNC:24051]
ZNF513	ZNF513	ENSCDRG00005009156	zinc finger protein 513 [Source:NCBI gene;Acc:105098544]
ZFP28	ZFP28	ENSCDRG00005011444	ZFP28 zinc finger protein [Source:HGNC Symbol;Acc:HGNC:17801]
ZNF226	ZNF226	ENSCDRG00005005721	zinc finger protein 226 [Source:HGNC Symbol;Acc:HGNC:13019]
GLI1	GLI1	ENSCDRG00005018398	GLI family zinc finger 1 [Source:NCBI gene;Acc:105100348]
REXO4	ENSCDRG00005000665	ENSCDRG00005000665	REX4 homolog, 3'-5' exonuclease [Source:HGNC Symbol;Acc:HGNC:12820]
ZNF17	ENSCDRG00005005687	ENSCDRG00005005687	nan
CGGBP1	CGGBP1	ENSCDRG00005003263	CGG triplet repeat binding protein 1 [Source:NCBI gene;Acc:105087765]
ZNF37A	ENSCDRG00005007655	ENSCDRG00005007655	nan
ZBTB7B	ZBTB7B	ENSCDRG00005004259	zinc finger and BTB domain containing 7B [Source:NCBI gene;Acc:105088964]
ZNF567	ZNF567	ENSCDRG00005010968	zinc finger protein 567 [Source:HGNC Symbol;Acc:HGNC:28696]
ZNF446	ZNF446	ENSCDRG00005010353	zinc finger protein 446 [Source:HGNC Symbol;Acc:HGNC:21036]
ZNF706	ENSCDRG00005015606	ENSCDRG00005015606	nan
TEAD1	TEAD1	ENSCDRG00005018251	TEA domain transcription factor 1 [Source:NCBI gene;Acc:105086695]
PKNOX2	PKNOX2	ENSCDRG00005016833	PBX/knotted 1 homeobox 2 [Source:NCBI gene;Acc:105094458]
ZSCAN26	ZSCAN26	ENSCDRG00005005970	zinc finger and SCAN domain containing 26 [Source:HGNC Symbol;Acc:HGNC:12978]
CREBZF	CREBZF	ENSCDRG00005006000	CREB/ATF bZIP transcription factor [Source:HGNC Symbol;Acc:HGNC:24905]
SMAD4	SMAD4	ENSCDRG00005009019	SMAD family member 4 [Source:HGNC Symbol;Acc:HGNC:6770]
KLF6	KLF6	ENSCDRG00005017438	Kruppel like factor 6 [Source:NCBI gene;Acc:105104492]
TRERF1	TRERF1	ENSCDRG00005007238	transcriptional regulating factor 1 [Source:HGNC Symbol;Acc:HGNC:18273]
ZNF777	ZNF777	ENSCDRG00005013186	zinc finger protein 777 [Source:HGNC Symbol;Acc:HGNC:22213]
ZNF385A	ZNF385A	ENSCDRG00005003527	zinc finger protein 385A [Source:HGNC Symbol;Acc:HGNC:17521]
FOXN3	FOXN3	ENSCDRG00005004025	forkhead box N3 [Source:NCBI gene;Acc:105096751]
SALL3	SALL3	ENSCDRG00005010105	spalt like transcription factor 3 [Source:HGNC Symbol;Acc:HGNC:10527]
RBAK	RBAK	ENSCDRG00005018032	RB associated KRAB zinc finger [Source:NCBI gene;Acc:105099391]
MTF2	MTF2	ENSCDRG00005002314	metal response element binding transcription factor 2 [Source:NCBI gene;Acc:105085345]
ZBTB1	ZBTB1	ENSCDRG00005001236	zinc finger and BTB domain containing 1 [Source:HGNC Symbol;Acc:HGNC:20259]
TSHZ2	TSHZ2	ENSCDRG00005016617	teashirt zinc finger homeobox 2 [Source:NCBI gene;Acc:105085066]
ZNF212	ZNF212	ENSCDRG00005013056	zinc finger protein 212 [Source:HGNC Symbol;Acc:HGNC:13004]
ZSCAN20	ENSCDRG00005021063	ENSCDRG00005021063	zinc finger and SCAN domain containing 20 [Source:NCBI gene;Acc:105085772]
ZNF684	ZNF684	ENSCDRG00005014415	exonuclease 5 [Source:NCBI gene;Acc:105103380]
ZNF496	ZNF496	ENSCDRG00005008945	zinc finger protein 496 [Source:NCBI gene;Acc:105104205]
ZNF606	ZNF606	ENSCDRG00005009573	zinc finger protein 606 [Source:HGNC Symbol;Acc:HGNC:25879]
MBD4	MBD4	ENSCDRG00005018206	methyl-CpG binding domain 4, DNA glycosylase [Source:NCBI gene;Acc:105093094]
ZNF276	ZNF276	ENSCDRG00005019848	zinc finger protein 276 [Source:HGNC Symbol;Acc:HGNC:23330]
ZNF574	ZNF574	ENSCDRG00005018127	zinc finger protein 574 [Source:NCBI gene;Acc:105090226]
IRF1	IRF1	ENSCDRG00005003873	interferon regulatory factor 1 [Source:NCBI gene;Acc:105090093]
KLF12	KLF12	ENSCDRG00005004291	Kruppel like factor 12 [Source:NCBI gene;Acc:105088011]
ZNF502	ZNF502	ENSCDRG00005004275	zinc finger protein 502 [Source:NCBI gene;Acc:105091309]
FLI1	FLI1	ENSCDRG00005018918	Fli-1 proto-oncogene, ETS transcription factor [Source:HGNC Symbol;Acc:HGNC:3749]
SMAD3	SMAD3	ENSCDRG00005002780	SMAD family member 3 [Source:HGNC Symbol;Acc:HGNC:6769]
NR4A1	NR4A1	ENSCDRG00005011894	nuclear receptor subfamily 4 group A member 1 [Source:HGNC Symbol;Acc:HGNC:7980]
ZNF618	ZNF618	ENSCDRG00005015925	zinc finger protein 618 [Source:HGNC Symbol;Acc:HGNC:29416]
CXXC4	CXXC4	ENSCDRG00005014613	CXXC finger protein 4 [Source:HGNC Symbol;Acc:HGNC:24593]
MAFG	MAFG	ENSCDRG00005008797	MAF bZIP transcription factor G [Source:NCBI gene;Acc:105106385]
MITF	MITF	ENSCDRG00005003570	melanocyte inducing transcription factor [Source:NCBI gene;Acc:105095263]
ZNF217	ZNF217	ENSCDRG00005016648	zinc finger protein 217 [Source:HGNC Symbol;Acc:HGNC:13009]
ZNF395	ZNF395	ENSCDRG00005019830	zinc finger protein 395 [Source:NCBI gene;Acc:105102119]
SP4	SP4	ENSCDRG00005006199	Sp4 transcription factor [Source:HGNC Symbol;Acc:HGNC:11209]
SNAPC2	SNAPC2	ENSCDRG00005013517	small nuclear RNA activating complex polypeptide 2 [Source:NCBI gene;Acc:105087573]
PRMT3	PRMT3	ENSCDRG00005009301	protein arginine methyltransferase 3 [Source:HGNC Symbol;Acc:HGNC:30163]
ZC3H8	ZC3H8	ENSCDRG00005009808	zinc finger CCCH-type containing 8 [Source:NCBI gene;Acc:105093065]
OLIG1	OLIG1	ENSCDRG00005002416	oligodendrocyte transcription factor 1 [Source:NCBI gene;Acc:105089872]
REST	ENSCDRG00005001370	ENSCDRG00005001370	nan
HIF3A	HIF3A	ENSCDRG00005011604	hypoxia inducible factor 3 subunit alpha [Source:HGNC Symbol;Acc:HGNC:15825]
ZSCAN25	ZSCAN25	ENSCDRG00005010978	zinc finger and SCAN domain containing 25 [Source:HGNC Symbol;Acc:HGNC:21961]
XPA	XPA	ENSCDRG00005000280	XPA, DNA damage recognition and repair factor [Source:HGNC Symbol;Acc:HGNC:12814]
E2F4	E2F4	ENSCDRG00005009938	E2F transcription factor 4 [Source:HGNC Symbol;Acc:HGNC:3118]
SOX5	SOX5	ENSCDRG00005019208	SRY-box transcription factor 5 [Source:HGNC Symbol;Acc:HGNC:11201]
DR1	DR1	ENSCDRG00005002183	down-regulator of transcription 1 [Source:HGNC Symbol;Acc:HGNC:3017]
ZNF41	ZNF41	ENSCDRG00005015786	zinc finger protein 41 [Source:NCBI gene;Acc:105101943]
GLI3	GLI3	ENSCDRG00005011370	GLI family zinc finger 3 [Source:HGNC Symbol;Acc:HGNC:4319]
ZNF696	ZNF696	ENSCDRG00005014265	zinc finger protein 696 [Source:HGNC Symbol;Acc:HGNC:25872]
THAP5	THAP5	ENSCDRG00005000623	THAP domain containing 5 [Source:NCBI gene;Acc:105085298]
ZNF704	ZNF704	ENSCDRG00005016195	zinc finger protein 704 [Source:HGNC Symbol;Acc:HGNC:32291]
ELF1	ELF1	ENSCDRG00005011557	E74 like ETS transcription factor 1 [Source:NCBI gene;Acc:105098493]
GTF2IRD2	ENSCDRG00005017453	ENSCDRG00005017453	Camelus dromedarius general transcription factor II-I repeat domain-containing protein 2 (LOC105089688), transcript variant X1, mRNA. Sequence ID: XM_031432770.1
NRF1	NRF1	ENSCDRG00005000576	nuclear respiratory factor 1 [Source:NCBI gene;Acc:105085379]
ETV5	ETV5	ENSCDRG00005004646	ETS variant transcription factor 5 [Source:NCBI gene;Acc:105085855]
PAX6	PAX6	ENSCDRG00005019478	paired box 6 [Source:NCBI gene;Acc:105106645]
DPF1	DPF1	ENSCDRG00005002380	double PHD fingers 1 [Source:HGNC Symbol;Acc:HGNC:20225]
ZNF207	ENSCDRG00005011484	ENSCDRG00005011484	nan
ZNF516	ZNF516	ENSCDRG00005011507	zinc finger protein 516 [Source:HGNC Symbol;Acc:HGNC:28990]
NPAS3	ENSCDRG00005015572	ENSCDRG00005015572	nan
ZNF74	ENSCDRG00005009059	ENSCDRG00005009059	nan
ZNF527	ZNF527	ENSCDRG00005002076	zinc finger protein 527 [Source:NCBI gene;Acc:105096940]
ZNF33B	ENSCDRG00005007364	ENSCDRG00005007364	zinc finger protein 33B [Source:NCBI gene;Acc:105097401]
ADNP2	ADNP2	ENSCDRG00005019800	ADNP homeobox 2 [Source:HGNC Symbol;Acc:HGNC:23803]
IKZF5	IKZF5	ENSCDRG00005007437	IKAROS family zinc finger 5 [Source:NCBI gene;Acc:105085761]
KLF5	KLF5	ENSCDRG00005004273	Kruppel like factor 5 [Source:NCBI gene;Acc:105088010]
ZSCAN29	ZSCAN29	ENSCDRG00005014188	zinc finger and SCAN domain containing 29 [Source:NCBI gene;Acc:105101727]
ELK4	ELK4	ENSCDRG00005012052	ETS transcription factor ELK4 [Source:NCBI gene;Acc:105098626]
TFEB	TFEB	ENSCDRG00005017674	transcription factor EB [Source:HGNC Symbol;Acc:HGNC:11753]
MLX	MLX	ENSCDRG00005005697	MAX dimerization protein MLX [Source:NCBI gene;Acc:105090467]
ZNF227	ZNF227	ENSCDRG00005005736	zinc finger protein 227 [Source:HGNC Symbol;Acc:HGNC:13020]
MBD2	MBD2	ENSCDRG00005021689	methyl-CpG binding domain protein 2 [Source:HGNC Symbol;Acc:HGNC:6917]
ZNF619	ZNF619	ENSCDRG00005020083	zinc finger protein 619 [Source:HGNC Symbol;Acc:HGNC:26910]
SMAD5	SMAD5	ENSCDRG00005002115	SMAD family member 5 [Source:NCBI gene;Acc:105090469]
ESRRA	ESRRA	ENSCDRG00005017767	estrogen related receptor alpha [Source:HGNC Symbol;Acc:HGNC:3471]
PHF19	PHF19	ENSCDRG00005011924	PHD finger protein 19 [Source:HGNC Symbol;Acc:HGNC:24566]
ZNF790	ZNF790	ENSCDRG00005002186	zinc finger protein 790 [Source:HGNC Symbol;Acc:HGNC:33114]
L3MBTL3	L3MBTL3	ENSCDRG00005000173	L3MBTL histone methyl-lysine binding protein 3 [Source:NCBI gene;Acc:105096333]
NFXL1	NFXL1	ENSCDRG00005003159	nuclear transcription factor, X-box binding like 1 [Source:HGNC Symbol;Acc:HGNC:18726]
PLSCR1	ENSCDRG00005013564	ENSCDRG00005013564	phospholipid scramblase 1 [Source:NCBI gene;Acc:105089513]
ZBTB5	ZBTB5	ENSCDRG00005001091	zinc finger and BTB domain containing 5 [Source:NCBI gene;Acc:105102264]
ZNF689	ZNF689	ENSCDRG00005010284	zinc finger protein 689 [Source:HGNC Symbol;Acc:HGNC:25173]
ZNF550	ENSCDRG00005005808	ENSCDRG00005005808	nan
ZFP82	ZFP82	ENSCDRG00005001809	ZFP82 zinc finger protein [Source:NCBI gene;Acc:105101198]
ZFP64	ZFP64	ENSCDRG00005016359	ZFP64 zinc finger protein [Source:NCBI gene;Acc:105085065]
TFDP1	TFDP1	ENSCDRG00005011177	transcription factor Dp-1 [Source:HGNC Symbol;Acc:HGNC:11749]
ZNF569	ZNF569	ENSCDRG00005002088	zinc finger protein 569 [Source:HGNC Symbol;Acc:HGNC:24737]
SP110	ENSCDRG00005005003	ENSCDRG00005005003	nan
TIGD5	TIGD5	ENSCDRG00005015329	tigger transposable element derived 5 [Source:HGNC Symbol;Acc:HGNC:18336]
NFATC2	NFATC2	ENSCDRG00005015695	nuclear factor of activated T cells 2 [Source:HGNC Symbol;Acc:HGNC:7776]
ZNF570	ZNF570	ENSCDRG00005002106	zinc finger protein 570 [Source:NCBI gene;Acc:105096938]
FOXP2	FOXP2	ENSCDRG00005001657	forkhead box P2 [Source:HGNC Symbol;Acc:HGNC:13875]
ZNF473	ZNF473	ENSCDRG00005011477	zinc finger protein 473 [Source:NCBI gene;Acc:105100179]
LIN54	LIN54	ENSCDRG00005003557	lin-54 DREAM MuvB core complex component [Source:NCBI gene;Acc:105091949]
ZNF7	ZNF7	ENSCDRG00005018526	zinc finger protein 7 [Source:NCBI gene;Acc:105104976]
NR2E1	NR2E1	ENSCDRG00005008907	nuclear receptor subfamily 2 group E member 1 [Source:HGNC Symbol;Acc:HGNC:7973]
ZNF865	ZNF865	ENSCDRG00005008990	zinc finger protein 865 [Source:HGNC Symbol;Acc:HGNC:38705]
ZNF34	ZNF34	ENSCDRG00005018638	zinc finger protein 34 [Source:HGNC Symbol;Acc:HGNC:13098]
TP53	TP53	ENSCDRG00005009237	tumor protein p53 [Source:NCBI gene;Acc:105103011]
ZNF782	ZNF782	ENSCDRG00005017381	zinc finger protein 782 [Source:HGNC Symbol;Acc:HGNC:33110]
JUNB	JUNB	ENSCDRG00005022198	JunB proto-oncogene, AP-1 transcription factor subunit [Source:NCBI gene;Acc:105100749]
SOHLH2	SOHLH2	ENSCDRG00005020803	Camelus dromedarius spermatogenesis and oogenesis specific basic helix-loop-helix 2 (SOHLH2), transcript variant X2, mRNA. Sequence ID: XM_031465888.1
PRDM15	PRDM15	ENSCDRG00005009685	PR/SET domain 15 [Source:HGNC Symbol;Acc:HGNC:13999]
POU2F2	POU2F2	ENSCDRG00005017912	POU class 2 homeobox 2 [Source:HGNC Symbol;Acc:HGNC:9213]
KLF2	ENSCDRG00005021486	ENSCDRG00005021486	nan
KLF10	KLF10	ENSCDRG00005016136	Kruppel like factor 10 [Source:NCBI gene;Acc:105090526]
MAFB	MAFB	ENSCDRG00005009652	MAF bZIP transcription factor B [Source:HGNC Symbol;Acc:HGNC:6408]
SMYD3	SMYD3	ENSCDRG00005010356	SET and MYND domain containing 3 [Source:NCBI gene;Acc:105099491]
ZNF311	ZNF311	ENSCDRG00005006221	zinc finger protein 311 [Source:NCBI gene;Acc:105084543]
AHR	ENSCDRG00005005491	ENSCDRG00005005491	aryl hydrocarbon receptor [Source:NCBI gene;Acc:105092885]
PKNOX1	PKNOX1	ENSCDRG00005012370	PBX/knotted 1 homeobox 1 [Source:HGNC Symbol;Acc:HGNC:9022]
ZNF287	ZNF287	ENSCDRG00005014328	zinc finger protein 287 [Source:NCBI gene;Acc:105085076]
ZIC2	ZIC2	ENSCDRG00005018069	Zic family member 2 [Source:HGNC Symbol;Acc:HGNC:12873]
NR2C1	NR2C1	ENSCDRG00005020214	nuclear receptor subfamily 2 group C member 1 [Source:NCBI gene;Acc:105097421]
CREB5	CREB5	ENSCDRG00005001440	cAMP responsive element binding protein 5 [Source:HGNC Symbol;Acc:HGNC:16844]
ZNF181	ZNF181	ENSCDRG00005013282	Camelus dromedarius zinc finger protein 181 (ZNF181), transcript variant X2, mRNA. Sequence ID: XM_031458600.1
RORC	RORC	ENSCDRG00005015191	RAR related orphan receptor C [Source:HGNC Symbol;Acc:HGNC:10260]
ZNF354A	ENSCDRG00005007068	ENSCDRG00005007068	zinc finger protein 354A [Source:NCBI gene;Acc:105099611]
ZNF23	ZNF23	ENSCDRG00005008865	zinc finger protein 23 [Source:HGNC Symbol;Acc:HGNC:13023]
ZBTB37	ZBTB37	ENSCDRG00005003941	zinc finger and BTB domain containing 37 [Source:HGNC Symbol;Acc:HGNC:28365]
ZNF280B	ZNF280B	ENSCDRG00005022115	zinc finger protein 280B [Source:HGNC Symbol;Acc:HGNC:23022]
IRF5	IRF5	ENSCDRG00005009623	interferon regulatory factor 5 [Source:NCBI gene;Acc:105085373]
ZNF583	ENSCDRG00005011224	ENSCDRG00005011224	zinc finger protein 583 [Source:NCBI gene;Acc:105098765]
E2F6	E2F6	ENSCDRG00005003569	E2F transcription factor 6 [Source:NCBI gene;Acc:105091255]
ZBTB17	ZBTB17	ENSCDRG00005003563	zinc finger and BTB domain containing 17 [Source:HGNC Symbol;Acc:HGNC:12936]
ZNF131	ZNF131	ENSCDRG00005014946	zinc finger protein 131 [Source:NCBI gene;Acc:105107040]
FOXN4	FOXN4	ENSCDRG00005010498	forkhead box N4 [Source:HGNC Symbol;Acc:HGNC:21399]
CSRNP1	CSRNP1	ENSCDRG00005019709	cysteine and serine rich nuclear protein 1 [Source:NCBI gene;Acc:105084643]
ZNF281	ZNF281	ENSCDRG00005011534	zinc finger protein 281 [Source:HGNC Symbol;Acc:HGNC:13075]
SPI1	SPI1	ENSCDRG00005001988	Spi-1 proto-oncogene [Source:NCBI gene;Acc:105106877]
ZNF565	ZNF565	ENSCDRG00005011131	zinc finger protein 565 [Source:HGNC Symbol;Acc:HGNC:26726]
SMAD1	SMAD1	ENSCDRG00005000018	SMAD family member 1 [Source:NCBI gene;Acc:105091210]
ZNF174	ZNF174	ENSCDRG00005006525	zinc finger protein 174 [Source:NCBI gene;Acc:105099672]
ZNF331	ZNF331	ENSCDRG00005001422	zinc finger protein 331 [Source:HGNC Symbol;Acc:HGNC:15489]
ZNF653	ZNF653	ENSCDRG00005013182	zinc finger protein 653 [Source:HGNC Symbol;Acc:HGNC:25196]
ZNF277	ZNF277	ENSCDRG00005001498	zinc finger protein 277 [Source:HGNC Symbol;Acc:HGNC:13070]
MXD4	MXD4	ENSCDRG00005004719	MAX dimerization protein 4 [Source:HGNC Symbol;Acc:HGNC:13906]
ZNF324 // ZNF324B	ENSCDRG00005010321	ENSCDRG00005010321	zinc finger protein 324A-like [Source:NCBI gene;Acc:105096795]
ZNF641	ZNF641	ENSCDRG00005010093	zinc finger protein 641 [Source:NCBI gene;Acc:105103796]
ZNF248	ZNF248	ENSCDRG00005007295	zinc finger protein 248 [Source:NCBI gene;Acc:105097399]
HNF4A	HNF4A	ENSCDRG00005013135	hepatocyte nuclear factor 4 alpha [Source:NCBI gene;Acc:105087113]
TEAD2	TEAD2	ENSCDRG00005006601	TEA domain transcription factor 2 [Source:NCBI gene;Acc:105100216]
NKRF	NKRF	ENSCDRG00005011784	NFKB repressing factor [Source:HGNC Symbol;Acc:HGNC:19374]
ZNF821	ZNF821	ENSCDRG00005007845	zinc finger protein 821 [Source:NCBI gene;Acc:105088380]
ZNF662	ZNF662	ENSCDRG00005003383	zinc finger protein 662 [Source:HGNC Symbol;Acc:HGNC:31930]
ARID3B	ARID3B	ENSCDRG00005005056	AT-rich interaction domain 3B [Source:HGNC Symbol;Acc:HGNC:14350]
ZNF341	ZNF341	ENSCDRG00005011605	zinc finger protein 341 [Source:HGNC Symbol;Acc:HGNC:15992]
DUX4	ENSCDRG00005020704	ENSCDRG00005020704	nan
ZNF639	ZNF639	ENSCDRG00005000309	zinc finger protein 639 [Source:NCBI gene;Acc:105085926]
LHX2	LHX2	ENSCDRG00005006859	LIM homeobox 2 [Source:HGNC Symbol;Acc:HGNC:6594]
IKZF4	IKZF4	ENSCDRG00005005019	IKAROS family zinc finger 4 [Source:NCBI gene;Acc:105086381]
TOPORS	TOPORS	ENSCDRG00005006545	TOP1 binding arginine/serine rich protein [Source:HGNC Symbol;Acc:HGNC:21653]
ZNF580	ZNF580	ENSCDRG00005009048	zinc finger protein 580 [Source:HGNC Symbol;Acc:HGNC:29473]
ZSCAN16	ZSCAN16	ENSCDRG00005005855	zinc finger and SCAN domain containing 16 [Source:HGNC Symbol;Acc:HGNC:20813]
ZNF624	ZNF624	ENSCDRG00005014283	zinc finger protein 624 [Source:NCBI gene;Acc:105085074]
ZNF543	ENSCDRG00005013149	ENSCDRG00005013149	nan
ELK3	ELK3	ENSCDRG00005019714	ETS transcription factor ELK3 [Source:HGNC Symbol;Acc:HGNC:3325]
TFDP2	TFDP2	ENSCDRG00005009411	transcription factor Dp-2 [Source:NCBI gene;Acc:105086325]
ZNF770	ZNF770	ENSCDRG00005001745	zinc finger protein 770 [Source:NCBI gene;Acc:105089988]
ZNF35	ZNF35	ENSCDRG00005004261	zinc finger protein 35 [Source:HGNC Symbol;Acc:HGNC:13099]
JDP2	JDP2	ENSCDRG00005001197	Jun dimerization protein 2 [Source:HGNC Symbol;Acc:HGNC:17546]
ZNF500	ZNF500	ENSCDRG00005009441	zinc finger protein 500 [Source:NCBI gene;Acc:105099814]
ZNF354B	ZNF354B	ENSCDRG00005006982	zinc finger protein 354B [Source:HGNC Symbol;Acc:HGNC:17197]
ZNF346	ZNF346	ENSCDRG00005010698	zinc finger protein 346 [Source:HGNC Symbol;Acc:HGNC:16403]
THAP7	THAP7	ENSCDRG00005010955	THAP domain containing 7 [Source:HGNC Symbol;Acc:HGNC:23190]
GABPA	GABPA	ENSCDRG00005000423	GA binding protein transcription factor subunit alpha [Source:NCBI gene;Acc:105086809]
NFKB2	NFKB2	ENSCDRG00005014133	nuclear factor kappa B subunit 2 [Source:HGNC Symbol;Acc:HGNC:7795]
GMEB2	GMEB2	ENSCDRG00005009783	glucocorticoid modulatory element binding protein 2 [Source:HGNC Symbol;Acc:HGNC:4371]
ZNF792	ZNF792	ENSCDRG00005011807	zinc finger protein 792 [Source:NCBI gene;Acc:105088026]
THAP9	THAP9	ENSCDRG00005003500	THAP domain containing 9 [Source:NCBI gene;Acc:105092187]
ZNF510	ENSCDRG00005017408	ENSCDRG00005017408	nan
MECOM	MECOM	ENSCDRG00005004370	MDS1 and EVI1 complex locus [Source:HGNC Symbol;Acc:HGNC:3498]
VDR	VDR	ENSCDRG00005011877	vitamin D receptor [Source:NCBI gene;Acc:105103804]
REST	ENSCDRG00005010708	ENSCDRG00005010708	nan
HMG20B	HMG20B	ENSCDRG00005005967	high mobility group 20B [Source:HGNC Symbol;Acc:HGNC:5002]
ARNTL	ARNTL	ENSCDRG00005018014	aryl hydrocarbon receptor nuclear translocator like [Source:NCBI gene;Acc:105086694]
MTERF4	MTERF4	ENSCDRG00005021768	mitochondrial transcription termination factor 4 [Source:HGNC Symbol;Acc:HGNC:28785]
ZNF214	ZNF214	ENSCDRG00005013736	zinc finger protein 214 [Source:HGNC Symbol;Acc:HGNC:13006]
ZNF454	ZNF454	ENSCDRG00005006909	zinc finger protein 454 [Source:HGNC Symbol;Acc:HGNC:21200]
ZNF200	ZNF200	ENSCDRG00005018734	zinc finger protein 200 [Source:NCBI gene;Acc:105099679]
PBX1	PBX1	ENSCDRG00005004337	PBX homeobox 1 [Source:HGNC Symbol;Acc:HGNC:8632]
RARG	RARG	ENSCDRG00005005534	retinoic acid receptor gamma [Source:NCBI gene;Acc:105094572]
ZNF510	ENSCDRG00005006572	ENSCDRG00005006572	nan
ZNF548	ENSCDRG00005005707	ENSCDRG00005005707	nan
ZNF235	ZNF235	ENSCDRG00005005741	zinc finger protein 235 [Source:HGNC Symbol;Acc:HGNC:12866]
ZNF234	ZNF234	ENSCDRG00005005693	zinc finger protein 234 [Source:HGNC Symbol;Acc:HGNC:13027]
MTF1	MTF1	ENSCDRG00005010175	metal regulatory transcription factor 1 [Source:NCBI gene;Acc:105086923]
PRDM16	PRDM16	ENSCDRG00005014074	PR/SET domain 16 [Source:HGNC Symbol;Acc:HGNC:14000]
PEG3	ENSCDRG00005012912	ENSCDRG00005012912	nan
ZIC1	ENSCDRG00005012769	ENSCDRG00005012769	nan
ZNF239	ZNF239	ENSCDRG00005018031	zinc finger protein 239 [Source:HGNC Symbol;Acc:HGNC:13031]
SATB2	SATB2	ENSCDRG00005010563	SATB homeobox 2 [Source:HGNC Symbol;Acc:HGNC:21637]
E2F5	E2F5	ENSCDRG00005017204	E2F transcription factor 5 [Source:HGNC Symbol;Acc:HGNC:3119]
HES4	HES4	ENSCDRG00005004825	hes family bHLH transcription factor 4 [Source:HGNC Symbol;Acc:HGNC:24149]
ZNF282	ENSCDRG00005013008	ENSCDRG00005013008	nan
SETDB2	SETDB2	ENSCDRG00005005649	SET domain bifurcated histone lysine methyltransferase 2 [Source:NCBI gene;Acc:105101932]
NFATC1	NFATC1	ENSCDRG00005009800	nuclear factor of activated T cells 1 [Source:HGNC Symbol;Acc:HGNC:7775]
BCL11A	BCL11A	ENSCDRG00005003770	BAF chromatin remodeling complex subunit BCL11A [Source:HGNC Symbol;Acc:HGNC:13221]
GLI4	GLI4	ENSCDRG00005014170	GLI family zinc finger 4 [Source:HGNC Symbol;Acc:HGNC:4320]
ZNF300	ZNF300	ENSCDRG00005001937	zinc finger protein 300 [Source:NCBI gene;Acc:105098470]
ZNF112	ENSCDRG00005005772	ENSCDRG00005005772	nan
ZNF514	ZNF514	ENSCDRG00005020191	zinc finger protein 514 [Source:HGNC Symbol;Acc:HGNC:25894]
ZNF75D	ZNF75D	ENSCDRG00005015246	zinc finger protein 75D [Source:HGNC Symbol;Acc:HGNC:13145]
ZNF274	ZNF274	ENSCDRG00005009749	zinc finger protein 274 [Source:HGNC Symbol;Acc:HGNC:13068]
EBF4	EBF4	ENSCDRG00005010379	EBF family member 4 [Source:HGNC Symbol;Acc:HGNC:29278]
THAP11	THAP11	ENSCDRG00005014821	THAP domain containing 11 [Source:HGNC Symbol;Acc:HGNC:23194]
AR	AR	ENSCDRG00005013801	androgen receptor [Source:HGNC Symbol;Acc:HGNC:644]
DNTTIP1	DNTTIP1	ENSCDRG00005018751	deoxynucleotidyltransferase terminal interacting protein 1 [Source:HGNC Symbol;Acc:HGNC:16160]
CREB1	CREB1	ENSCDRG00005016249	cAMP responsive element binding protein 1 [Source:NCBI gene;Acc:105093562]
ZNF438	ZNF438	ENSCDRG00005009205	zinc finger protein 438 [Source:NCBI gene;Acc:105086863]
TCF7L1	TCF7L1	ENSCDRG00005016823	transcription factor 7 like 1 [Source:HGNC Symbol;Acc:HGNC:11640]
CREB3L4	CREB3L4	ENSCDRG00005017685	cAMP responsive element binding protein 3 like 4 [Source:NCBI gene;Acc:105089327]
ZNF45	ZNF45	ENSCDRG00005005664	zinc finger protein 45 [Source:NCBI gene;Acc:105090249]
BNC2	BNC2	ENSCDRG00005000440	basonuclin 2 [Source:NCBI gene;Acc:105095952]
ZNF471	ZNF471	ENSCDRG00005011393	zinc finger protein 471 [Source:HGNC Symbol;Acc:HGNC:23226]
PURG	PURG	ENSCDRG00005018427	purine rich element binding protein G [Source:HGNC Symbol;Acc:HGNC:17930]
ZSCAN2	ZSCAN2	ENSCDRG00005013174	zinc finger and SCAN domain containing 2 [Source:HGNC Symbol;Acc:HGNC:20994]
ZNF773	ZNF773	ENSCDRG00005005758	zinc finger protein 773-like [Source:NCBI gene;Acc:105105032]
ZNF260	ZNF260	ENSCDRG00005001851	zinc finger protein 260 [Source:NCBI gene;Acc:105101196]
ZNF774	ZNF774	ENSCDRG00005013125	zinc finger protein 774 [Source:NCBI gene;Acc:105094702]
ZBTB33	ZBTB33	ENSCDRG00005013633	zinc finger and BTB domain containing 33 [Source:HGNC Symbol;Acc:HGNC:16682]
JRK	JRK	ENSCDRG00005013365	Jrk helix-turn-helix protein [Source:HGNC Symbol;Acc:HGNC:6199]
ZNF688	ZNF688	ENSCDRG00005010207	zinc finger protein 688 [Source:HGNC Symbol;Acc:HGNC:30489]
ZNF554	ZNF554	ENSCDRG00005008395	zinc finger protein 554 [Source:HGNC Symbol;Acc:HGNC:26629]
ZNF3	ZNF3	ENSCDRG00005010023	zinc finger protein 3 [Source:HGNC Symbol;Acc:HGNC:13089]
ZNF879	ZNF879	ENSCDRG00005006793	zinc finger protein 879 [Source:HGNC Symbol;Acc:HGNC:37273]
TBX3	TBX3	ENSCDRG00005015059	T-box transcription factor 3 [Source:HGNC Symbol;Acc:HGNC:11602]
CASZ1	CASZ1	ENSCDRG00005016022	castor zinc finger 1 [Source:HGNC Symbol;Acc:HGNC:26002]
GLIS2	GLIS2	ENSCDRG00005007951	GLIS family zinc finger 2 [Source:HGNC Symbol;Acc:HGNC:29450]
REL	REL	ENSCDRG00005003849	REL proto-oncogene, NF-kB subunit [Source:NCBI gene;Acc:105097239]
ZBTB24	ZBTB24	ENSCDRG00005006796	zinc finger and BTB domain containing 24 [Source:NCBI gene;Acc:105097109]
ZUP1	ZUP1	ENSCDRG00005002876	zinc finger containing ubiquitin peptidase 1 [Source:NCBI gene;Acc:105088333]
DACH2	DACH2	ENSCDRG00005021299	dachshund family transcription factor 2 [Source:NCBI gene;Acc:105092109]
NR1D1	NR1D1	ENSCDRG00005006182	nuclear receptor subfamily 1 group D member 1 [Source:NCBI gene;Acc:105099029]
ZNF143	ZNF143	ENSCDRG00005008243	zinc finger protein 143 [Source:HGNC Symbol;Acc:HGNC:12928]
ZNF546	ZNF546	ENSCDRG00005009967	zinc finger protein 546 [Source:HGNC Symbol;Acc:HGNC:28671]
ZNF184	ZNF184	ENSCDRG00005005477	zinc finger protein 184 [Source:NCBI gene;Acc:105106210]
ZNF132	ZNF132	ENSCDRG00005010294	zinc finger protein 132 [Source:HGNC Symbol;Acc:HGNC:12916]
ZNF829	ZNF829	ENSCDRG00005001680	zinc finger protein 829 [Source:NCBI gene;Acc:105101189]
ZNF233	ZNF233	ENSCDRG00005005755	zinc finger protein 233 [Source:HGNC Symbol;Acc:HGNC:30946]
ESRRB	ESRRB	ENSCDRG00005001673	estrogen related receptor beta [Source:NCBI gene;Acc:105086076]
HINFP	HINFP	ENSCDRG00005020790	histone H4 transcription factor [Source:HGNC Symbol;Acc:HGNC:17850]
SATB1	SATB1	ENSCDRG00005002136	SATB homeobox 1 [Source:HGNC Symbol;Acc:HGNC:10541]
ZNF599	ZNF599	ENSCDRG00005012866	zinc finger protein 599 [Source:NCBI gene;Acc:105096729]
HMGN3	HMGN3	ENSCDRG00005007299	high mobility group nucleosomal binding domain 3 [Source:HGNC Symbol;Acc:HGNC:12312]
MLXIPL	MLXIPL	ENSCDRG00005004016	MLX interacting protein like [Source:HGNC Symbol;Acc:HGNC:12744]
TBPL1	TBPL1	ENSCDRG00005021546	TATA-box binding protein like 1 [Source:NCBI gene;Acc:105096361]
ZSCAN30	ZSCAN30	ENSCDRG00005010555	zinc finger and SCAN domain containing 30 [Source:HGNC Symbol;Acc:HGNC:33517]
TCF7	TCF7	ENSCDRG00005003054	transcription factor 7 [Source:HGNC Symbol;Acc:HGNC:11639]
ZNF613	ZNF613	ENSCDRG00005000718	zinc finger protein 613 [Source:HGNC Symbol;Acc:HGNC:25827]
ERG	ERG	ENSCDRG00005007389	ETS transcription factor ERG [Source:NCBI gene;Acc:105104668]
ZFP57	ZFP57	ENSCDRG00005010482	ZFP57 zinc finger protein [Source:HGNC Symbol;Acc:HGNC:18791]
ZNF57	ENSCDRG00005022231	ENSCDRG00005022231	nan
ZBTB8A	ZBTB8A	ENSCDRG00005020626	zinc finger and BTB domain containing 8A [Source:NCBI gene;Acc:105085785]
ZBTB48	ZBTB48	ENSCDRG00005008815	zinc finger and BTB domain containing 48 [Source:HGNC Symbol;Acc:HGNC:4930]
ZNF2	ZNF2	ENSCDRG00005020181	zinc finger protein 2 [Source:HGNC Symbol;Acc:HGNC:12991]
L3MBTL4	L3MBTL4	ENSCDRG00005013404	L3MBTL histone methyl-lysine binding protein 4 [Source:HGNC Symbol;Acc:HGNC:26677]
ZFP62	ZFP62	ENSCDRG00005009945	ZFP62 zinc finger protein [Source:HGNC Symbol;Acc:HGNC:23241]
RORA	RORA	ENSCDRG00005010112	RAR related orphan receptor A [Source:HGNC Symbol;Acc:HGNC:10258]
ZFP30	ENSCDRG00005002201	ENSCDRG00005002201	ZFP30 zinc finger protein [Source:HGNC Symbol;Acc:HGNC:29555]
MYCL	MYCL	ENSCDRG00005013289	MYCL proto-oncogene, bHLH transcription factor [Source:HGNC Symbol;Acc:HGNC:7555]
ZNF764	ENSCDRG00005010160	ENSCDRG00005010160	Camelus dromedarius zinc finger protein 764-like (LOC105102792), transcript variant X3, mRNA. Sequence ID: XM_031432895.1
NR1H3	NR1H3	ENSCDRG00005006795	nuclear receptor subfamily 1 group H member 3 [Source:NCBI gene;Acc:105106874]
PRDM8	PRDM8	ENSCDRG00005002363	PR/SET domain 8 [Source:HGNC Symbol;Acc:HGNC:13993]
ZNF280C	ZNF280C	ENSCDRG00005009667	zinc finger protein 280C [Source:HGNC Symbol;Acc:HGNC:25955]
YBX3	YBX3	ENSCDRG00005009221	Y-box binding protein 3 [Source:HGNC Symbol;Acc:HGNC:2428]
TFAP4	TFAP4	ENSCDRG00005007912	transcription factor AP-4 [Source:NCBI gene;Acc:105099826]
ZFPM1	ZFPM1	ENSCDRG00005020620	zinc finger protein, FOG family member 1 [Source:HGNC Symbol;Acc:HGNC:19762]
ZNF304	ZNF304	ENSCDRG00005013219	zinc finger protein 304 [Source:HGNC Symbol;Acc:HGNC:13505]
NFYA	NFYA	ENSCDRG00005016192	nuclear transcription factor Y subunit alpha [Source:NCBI gene;Acc:105086741]
PRDM1	PRDM1	ENSCDRG00005010476	PR/SET domain 1 [Source:NCBI gene;Acc:105097136]
ZNF558	ENSCDRG00005013914	ENSCDRG00005013914	zinc finger protein 558 [Source:HGNC Symbol;Acc:HGNC:26422]
DBP	DBP	ENSCDRG00005002166	D-box binding PAR bZIP transcription factor [Source:HGNC Symbol;Acc:HGNC:2697]
ZBTB43	ZBTB43	ENSCDRG00005015839	zinc finger and BTB domain containing 43 [Source:NCBI gene;Acc:105092618]
ZNF396	ZNF396	ENSCDRG00005010416	zinc finger protein 396 [Source:HGNC Symbol;Acc:HGNC:18824]
KIN	KIN	ENSCDRG00005013334	Kin17 DNA and RNA binding protein [Source:HGNC Symbol;Acc:HGNC:6327]
RUNX2	RUNX2	ENSCDRG00005016851	RUNX family transcription factor 2 [Source:HGNC Symbol;Acc:HGNC:10472]
ZBTB9	ZBTB9	ENSCDRG00005021729	zinc finger and BTB domain containing 9 [Source:NCBI gene;Acc:105101378]
ELF4	ELF4	ENSCDRG00005008816	E74 like ETS transcription factor 4 [Source:NCBI gene;Acc:105098818]
EBF1	ENSCDRG00005000065	ENSCDRG00005000065	nan
PPARA	PPARA	ENSCDRG00005012319	peroxisome proliferator activated receptor alpha [Source:NCBI gene;Acc:105091841]
TP63	TP63	ENSCDRG00005007787	tumor protein p63 [Source:NCBI gene;Acc:105097542]
ZNF135	ZNF135	ENSCDRG00005009661	zinc finger protein 135 [Source:HGNC Symbol;Acc:HGNC:12919]
ZNF215	ZNF215	ENSCDRG00005013783	zinc finger protein 215 [Source:HGNC Symbol;Acc:HGNC:13007]
NR1I3	NR1I3	ENSCDRG00005017237	nuclear receptor subfamily 1 group I member 3 [Source:HGNC Symbol;Acc:HGNC:7969]
TEAD3	TEAD3	ENSCDRG00005008998	TEA domain transcription factor 3 [Source:NCBI gene;Acc:105101426]
ZNF202	ZNF202	ENSCDRG00005014421	zinc finger protein 202 [Source:NCBI gene;Acc:105094498]
ZNF808	ENSCDRG00005001245	ENSCDRG00005001245	nan
BACH2	BACH2	ENSCDRG00005017369	BTB domain and CNC homolog 2 [Source:HGNC Symbol;Acc:HGNC:14078]
ZNF316	ENSCDRG00005017008	ENSCDRG00005017008	nan
BCL6B	BCL6B	ENSCDRG00005018114	BCL6B transcription repressor [Source:HGNC Symbol;Acc:HGNC:1002]
LYL1	LYL1	ENSCDRG00005022168	LYL1 basic helix-loop-helix family member [Source:HGNC Symbol;Acc:HGNC:6734]
ZMAT1	ZMAT1	ENSCDRG00005014215	zinc finger matrin-type 1 [Source:HGNC Symbol;Acc:HGNC:29377]
ZNF394	ZNF394	ENSCDRG00005011366	zinc finger protein 394 [Source:NCBI gene;Acc:105099354]
JRKL	JRKL	ENSCDRG00005017005	JRK like [Source:NCBI gene;Acc:105087187]
C11orf95	C11orf95	ENSCDRG00005019367	chromosome 11 open reading frame 95 [Source:HGNC Symbol;Acc:HGNC:28449]
ZSCAN21	ZSCAN21	ENSCDRG00005010056	zinc finger and SCAN domain containing 21 [Source:HGNC Symbol;Acc:HGNC:13104]
OLIG2	OLIG2	ENSCDRG00005002406	oligodendrocyte transcription factor 2 [Source:HGNC Symbol;Acc:HGNC:9398]
ZNF8	ZNF8	ENSCDRG00005009879	zinc finger protein 8 [Source:HGNC Symbol;Acc:HGNC:13154]
POU6F2	ENSCDRG00005012656	ENSCDRG00005012656	nan
ZNF26	ZNF26	ENSCDRG00005019613	zinc finger protein 26 [Source:NCBI gene;Acc:105101625]
ZNF414	ZNF414	ENSCDRG00005010644	zinc finger protein 414 [Source:HGNC Symbol;Acc:HGNC:20630]
ZNF133	ZNF133	ENSCDRG00005003997	zinc finger protein 133 [Source:HGNC Symbol;Acc:HGNC:12917]
NR6A1	NR6A1	ENSCDRG00005017082	nuclear receptor subfamily 6 group A member 1 [Source:HGNC Symbol;Acc:HGNC:7985]
ZNF699	ZNF699	ENSCDRG00005004185	zinc finger protein 699 [Source:NCBI gene;Acc:105105402]
ZNF713	ZNF713	ENSCDRG00005015470	zinc finger protein 713 [Source:HGNC Symbol;Acc:HGNC:22043]
ZNF444	ENSCDRG00005010902	ENSCDRG00005010902	nan
ZNF789	ZNF789	ENSCDRG00005011225	zinc finger protein 789 [Source:HGNC Symbol;Acc:HGNC:27801]
ZNF467	ENSCDRG00005013467	ENSCDRG00005013467	nan
KLF4	KLF4	ENSCDRG00005011635	Kruppel like factor 4 [Source:NCBI gene;Acc:105087924]
ZNF382	ZNF382	ENSCDRG00005001869	zinc finger protein 382 [Source:HGNC Symbol;Acc:HGNC:17409]
INSM2	INSM2	ENSCDRG00005017254	INSM transcriptional repressor 2 [Source:HGNC Symbol;Acc:HGNC:17539]
ESRRG	ESRRG	ENSCDRG00005016328	estrogen related receptor gamma [Source:NCBI gene;Acc:105100131]
NFATC4	NFATC4	ENSCDRG00005006701	nuclear factor of activated T cells 4 [Source:NCBI gene;Acc:105102434]
ZNF404	ZNF404	ENSCDRG00005005646	zinc finger protein 404 [Source:HGNC Symbol;Acc:HGNC:19417]
ZNF830	ZNF830	ENSCDRG00005019235	zinc finger protein 830 [Source:HGNC Symbol;Acc:HGNC:28291]
PLAGL2	PLAGL2	ENSCDRG00005016873	PLAG1 like zinc finger 2 [Source:NCBI gene;Acc:105100831]
HEY2	HEY2	ENSCDRG00005001524	hes related family bHLH transcription factor with YRPW motif 2 [Source:NCBI gene;Acc:105096317]
FOSB	FOSB	ENSCDRG00005008193	FosB proto-oncogene, AP-1 transcription factor subunit [Source:HGNC Symbol;Acc:HGNC:3797]
MYRFL	MYRFL	ENSCDRG00005019536	myelin regulatory factor like [Source:HGNC Symbol;Acc:HGNC:26316]
TBP	TBP	ENSCDRG00005018423	TATA-box binding protein [Source:HGNC Symbol;Acc:HGNC:11588]
PRDM5	PRDM5	ENSCDRG00005003544	PR/SET domain 5 [Source:HGNC Symbol;Acc:HGNC:9349]
MAX	MAX	ENSCDRG00005001543	MYC associated factor X [Source:NCBI gene;Acc:105086182]
NKX6-2	NKX6-2	ENSCDRG00005002826	NK6 homeobox 2 [Source:HGNC Symbol;Acc:HGNC:19321]
BARX2	BARX2	ENSCDRG00005005682	BARX homeobox 2 [Source:HGNC Symbol;Acc:HGNC:956]
POU3F1	POU3F1	ENSCDRG00005010634	POU class 3 homeobox 1 [Source:HGNC Symbol;Acc:HGNC:9214]
CREB3L1	CREB3L1	ENSCDRG00005011173	cAMP responsive element binding protein 3 like 1 [Source:HGNC Symbol;Acc:HGNC:18856]
ZBTB25	ZBTB25	ENSCDRG00005001217	zinc finger and BTB domain containing 25 [Source:NCBI gene;Acc:105086196]
ZBED9	ZBED9	ENSCDRG00005006145	zinc finger BED-type containing 9 [Source:NCBI gene;Acc:105084580]
GLI2	GLI2	ENSCDRG00005011956	GLI family zinc finger 2 [Source:HGNC Symbol;Acc:HGNC:4318]
PBX3	PBX3	ENSCDRG00005015941	PBX homeobox 3 [Source:NCBI gene;Acc:105092621]
TGIF1	TGIF1	ENSCDRG00005010359	TGFB induced factor homeobox 1 [Source:NCBI gene;Acc:105086059]
ZNF529	ZNF529	ENSCDRG00005001859	zinc finger protein 529 [Source:HGNC Symbol;Acc:HGNC:29328]
THAP4	ENSCDRG00005000232	ENSCDRG00005000232	nan
ZBTB2	ZBTB2	ENSCDRG00005020809	zinc finger and BTB domain containing 2 [Source:NCBI gene;Acc:105100924]
ATF1	ATF1	ENSCDRG00005004036	activating transcription factor 1 [Source:NCBI gene;Acc:105097180]
ARID3A	ARID3A	ENSCDRG00005018171	AT-rich interaction domain 3A [Source:HGNC Symbol;Acc:HGNC:3031]
GRHL1	GRHL1	ENSCDRG00005021421	grainyhead like transcription factor 1 [Source:HGNC Symbol;Acc:HGNC:17923]
ATF3	ATF3	ENSCDRG00005018313	activating transcription factor 3 [Source:HGNC Symbol;Acc:HGNC:785]
ZBTB21	ENSCDRG00005010047	ENSCDRG00005010047	nan
GLMP	GLMP	ENSCDRG00005012477	glycosylated lysosomal membrane protein [Source:NCBI gene;Acc:105105649]
MEIS1	MEIS1	ENSCDRG00005006803	Meis homeobox 1 [Source:NCBI gene;Acc:105088930]
FOXS1	FOXS1	ENSCDRG00005016219	forkhead box S1 [Source:HGNC Symbol;Acc:HGNC:3735]
CREM	CREM	ENSCDRG00005016686	cAMP responsive element modulator [Source:NCBI gene;Acc:105085973]
ZNF846	ENSCDRG00005004292	ENSCDRG00005004292	nan
ZNF503	ZNF503	ENSCDRG00005018488	zinc finger protein 503 [Source:HGNC Symbol;Acc:HGNC:23589]
ZBTB22	ZBTB22	ENSCDRG00005021690	zinc finger and BTB domain containing 22 [Source:HGNC Symbol;Acc:HGNC:13085]
ZNF32	ZNF32	ENSCDRG00005017982	zinc finger protein 32 [Source:NCBI gene;Acc:105084469]
GTF3A	GTF3A	ENSCDRG00005021807	general transcription factor IIIA [Source:HGNC Symbol;Acc:HGNC:4662]
ZBTB39	ZBTB39	ENSCDRG00005016594	zinc finger and BTB domain containing 39 [Source:NCBI gene;Acc:105098300]
ZNF783	ZNF783	ENSCDRG00005013116	zinc finger family member 783 [Source:HGNC Symbol;Acc:HGNC:27222]
DACH1	DACH1	ENSCDRG00005003598	dachshund family transcription factor 1 [Source:HGNC Symbol;Acc:HGNC:2663]
HES1	HES1	ENSCDRG00005013252	hes family bHLH transcription factor 1 [Source:HGNC Symbol;Acc:HGNC:5192]
ZKSCAN4	ZKSCAN4	ENSCDRG00005005944	zinc finger with KRAB and SCAN domains 4 [Source:NCBI gene;Acc:105084553]
MZF1	MZF1	ENSCDRG00005010781	myeloid zinc finger 1 [Source:HGNC Symbol;Acc:HGNC:13108]
MSANTD1	MSANTD1	ENSCDRG00005002625	Myb/SANT DNA binding domain containing 1 [Source:HGNC Symbol;Acc:HGNC:33741]
ZNF385C	ZNF385C	ENSCDRG00005004221	zinc finger protein 385C [Source:HGNC Symbol;Acc:HGNC:33722]
ZNF10	ENSCDRG00005020183	ENSCDRG00005020183	nan
ZNF584	ZNF584	ENSCDRG00005010270	zinc finger protein 584 [Source:HGNC Symbol;Acc:HGNC:27318]
THAP3	THAP3	ENSCDRG00005009099	THAP domain containing 3 [Source:HGNC Symbol;Acc:HGNC:20855]
GRHL3	GRHL3	ENSCDRG00005003967	grainyhead like transcription factor 3 [Source:NCBI gene;Acc:105097279]
MEIS2	MEIS2	ENSCDRG00005001478	Meis homeobox 2 [Source:NCBI gene;Acc:105089993]
ZBTB7C	ZBTB7C	ENSCDRG00005012395	zinc finger and BTB domain containing 7C [Source:HGNC Symbol;Acc:HGNC:31700]
RELB	RELB	ENSCDRG00005006405	RELB proto-oncogene, NF-kB subunit [Source:HGNC Symbol;Acc:HGNC:9956]
SIX3	SIX3	ENSCDRG00005022157	SIX homeobox 3 [Source:HGNC Symbol;Acc:HGNC:10889]
ZFHX2	ENSCDRG00005014540	ENSCDRG00005014540	nan
MTERF3	MTERF3	ENSCDRG00005021236	mitochondrial transcription termination factor 3 [Source:HGNC Symbol;Acc:HGNC:24258]
NFYB	NFYB	ENSCDRG00005019339	nuclear transcription factor Y subunit beta [Source:NCBI gene;Acc:105097480]
ZNF597	ZNF597	ENSCDRG00005006563	zinc finger protein 597 [Source:NCBI gene;Acc:105099671]
ZNF71	ENSCDRG00005011573	ENSCDRG00005011573	nan
DPF3	DPF3	ENSCDRG00005005965	double PHD fingers 3 [Source:NCBI gene;Acc:105086255]
ZNF566	ZNF566	ENSCDRG00005001827	zinc finger protein 566 [Source:HGNC Symbol;Acc:HGNC:25919]
GATA2	GATA2	ENSCDRG00005010903	GATA binding protein 2 [Source:HGNC Symbol;Acc:HGNC:4171]
TIGD4	TIGD4	ENSCDRG00005018659	tigger transposable element derived 4 [Source:HGNC Symbol;Acc:HGNC:18335]
ZNF22	ZNF22	ENSCDRG00005017716	zinc finger protein 22 [Source:NCBI gene;Acc:105084523]
FOXJ1	FOXJ1	ENSCDRG00005004099	forkhead box J1 [Source:HGNC Symbol;Acc:HGNC:3816]
TBX5	TBX5	ENSCDRG00005014955	T-box transcription factor 5 [Source:NCBI gene;Acc:105104925]
ATOH8	ATOH8	ENSCDRG00005015499	atonal bHLH transcription factor 8 [Source:HGNC Symbol;Acc:HGNC:24126]
RFX8	RFX8	ENSCDRG00005016685	RFX family member 8, lacking RFX DNA binding domain [Source:HGNC Symbol;Acc:HGNC:37253]
ZNF180	ZNF180	ENSCDRG00005005828	zinc finger protein 180 [Source:HGNC Symbol;Acc:HGNC:12970]
ARNTL2	ARNTL2	ENSCDRG00005010535	aryl hydrocarbon receptor nuclear translocator like 2 [Source:HGNC Symbol;Acc:HGNC:18984]
SPIB	ENSCDRG00005013124	ENSCDRG00005013124	Spi-B transcription factor [Source:NCBI gene;Acc:105100172]
DDIT3	DDIT3	ENSCDRG00005018924	DNA damage inducible transcript 3 [Source:HGNC Symbol;Acc:HGNC:2726]
ZNF577	ZNF577	ENSCDRG00005000657	zinc finger protein 577 [Source:HGNC Symbol;Acc:HGNC:28673]
MYBL1	MYBL1	ENSCDRG00005020892	MYB proto-oncogene like 1 [Source:NCBI gene;Acc:105095834]
ZNF70	ZNF70	ENSCDRG00005021988	zinc finger protein 70 [Source:HGNC Symbol;Acc:HGNC:13140]
PRRX1	PRRX1	ENSCDRG00005011204	paired related homeobox 1 [Source:NCBI gene;Acc:105092754]
ESR2	ESR2	ENSCDRG00005001039	estrogen receptor 2 [Source:HGNC Symbol;Acc:HGNC:3468]
GATA3	GATA3	ENSCDRG00005013070	GATA binding protein 3 [Source:HGNC Symbol;Acc:HGNC:4172]
ZNF319	ZNF319	ENSCDRG00005005311	zinc finger protein 319 [Source:HGNC Symbol;Acc:HGNC:13644]
ZNF528 // ZNF83 // ZNF880	ENSCDRG00005001205	ENSCDRG00005001205	Camelus dromedarius zinc finger protein 160 (LOC105091271), transcript variant X6, misc_RNA. Sequence ID: XR_004138563.1
ZBTB45	ZBTB45	ENSCDRG00005010521	zinc finger and BTB domain containing 45 [Source:HGNC Symbol;Acc:HGNC:23715]
TIGD2	TIGD2	ENSCDRG00005001330	tigger transposable element derived 2 [Source:HGNC Symbol;Acc:HGNC:18333]
ZBTB34	ZBTB34	ENSCDRG00005015829	zinc finger and BTB domain containing 34 [Source:NCBI gene;Acc:105092617]
ZBTB46	ZBTB46	ENSCDRG00005010623	zinc finger and BTB domain containing 46 [Source:HGNC Symbol;Acc:HGNC:16094]
RUNX1	RUNX1	ENSCDRG00005002943	RUNX family transcription factor 1 [Source:HGNC Symbol;Acc:HGNC:10471]
ZIM2	ENSCDRG00005015450	ENSCDRG00005015450	nan
NFE2L3	NFE2L3	ENSCDRG00005000723	nuclear factor, erythroid 2 like 3 [Source:HGNC Symbol;Acc:HGNC:7783]
ZNF350	ENSCDRG00005000851	ENSCDRG00005000851	nan
NR2F6	NR2F6	ENSCDRG00005016096	nuclear receptor subfamily 2 group F member 6 [Source:NCBI gene;Acc:105101837]
NR4A2	NR4A2	ENSCDRG00005001248	nuclear receptor subfamily 4 group A member 2 [Source:HGNC Symbol;Acc:HGNC:7981]
TBX15	TBX15	ENSCDRG00005002975	T-box transcription factor 15 [Source:NCBI gene;Acc:105089600]
ZNF407	ENSCDRG00005011596	ENSCDRG00005011596	nan
ZSCAN31	ZSCAN31	ENSCDRG00005006014	zinc finger and SCAN domain containing 31 [Source:NCBI gene;Acc:105084551]
ZNF691	ZNF691	ENSCDRG00005006794	zinc finger protein 691 [Source:HGNC Symbol;Acc:HGNC:28028]
ZBTB14	ZBTB14	ENSCDRG00005012548	zinc finger and BTB domain containing 14 [Source:NCBI gene;Acc:105086011]
ARID5A	ARID5A	ENSCDRG00005019626	AT-rich interaction domain 5A [Source:HGNC Symbol;Acc:HGNC:17361]
SNAI2	SNAI2	ENSCDRG00005019580	snail family transcriptional repressor 2 [Source:NCBI gene;Acc:105095919]
NKX2-2	NKX2-2	ENSCDRG00005019726	NK2 homeobox 2 [Source:HGNC Symbol;Acc:HGNC:7835]
ZFP37	ZFP37	ENSCDRG00005005042	ZFP37 zinc finger protein [Source:NCBI gene;Acc:105096453]
ZNF582	ENSCDRG00005011252	ENSCDRG00005011252	nan
SCML4	SCML4	ENSCDRG00005009375	Scm polycomb group protein like 4 [Source:NCBI gene;Acc:105097124]
ZNF213	ZNF213	ENSCDRG00005018695	zinc finger protein 213 [Source:HGNC Symbol;Acc:HGNC:13005]
ETV4	ETV4	ENSCDRG00005012629	ETS variant transcription factor 4 [Source:NCBI gene;Acc:105101036]
ZBTB49	ZBTB49	ENSCDRG00005000134	zinc finger and BTB domain containing 49 [Source:HGNC Symbol;Acc:HGNC:19883]
ZNF286A	ENSCDRG00005014061	ENSCDRG00005014061	nan
ZFP69B	ZFP69B	ENSCDRG00005014292	ZFP69 zinc finger protein B [Source:NCBI gene;Acc:105103377]
ZNF425	ZNF425	ENSCDRG00005012890	zinc finger protein 425 [Source:HGNC Symbol;Acc:HGNC:20690]
ZFP2	ZFP2	ENSCDRG00005006933	ZFP2 zinc finger protein [Source:HGNC Symbol;Acc:HGNC:26138]
SP7	SP7	ENSCDRG00005005094	Sp7 transcription factor [Source:HGNC Symbol;Acc:HGNC:17321]
ZNF572	ZNF572	ENSCDRG00005004758	zinc finger protein 572 [Source:HGNC Symbol;Acc:HGNC:26758]
KLF8	KLF8	ENSCDRG00005011290	Kruppel like factor 8 [Source:NCBI gene;Acc:105093068]
GCM2	GCM2	ENSCDRG00005013490	glial cells missing transcription factor 2 [Source:NCBI gene;Acc:105101988]
MTERF1	MTERF1	ENSCDRG00005022042	mitochondrial transcription termination factor 1 [Source:NCBI gene;Acc:105087379]
CBX2	CBX2	ENSCDRG00005019007	chromobox 2 [Source:NCBI gene;Acc:105106245]
PPARG	PPARG	ENSCDRG00005017141	peroxisome proliferator activated receptor gamma [Source:NCBI gene;Acc:105093103]
ZNF575	ZNF575	ENSCDRG00005005260	zinc finger protein 575 [Source:HGNC Symbol;Acc:HGNC:27606]
ZNF775	ENSCDRG00005001660	ENSCDRG00005001660	nan
ZNF79	ZNF79	ENSCDRG00005014726	zinc finger protein 79 [Source:NCBI gene;Acc:105092611]
SLC2A4RG	ENSCDRG00005010553	ENSCDRG00005010553	nan
ZNF793	ENSCDRG00005002008	ENSCDRG00005002008	nan
SOX4	ENSCDRG00005018501	ENSCDRG00005018501	nan
LTF	LTF	ENSCDRG00005005940	Camelus dromedarius lactotransferrin (LTF), mRNA. [Source:RefSeq mRNA;Acc:NM_001303567]
DUX4	ENSCDRG00005020693	ENSCDRG00005020693	nan
ZBTB26	ZBTB26	ENSCDRG00005007665	zinc finger and BTB domain containing 26 [Source:NCBI gene;Acc:105092641]
SNAPC5	SNAPC5	ENSCDRG00005002604	small nuclear RNA activating complex polypeptide 5 [Source:NCBI gene;Acc:105093266]
MAFK	MAFK	ENSCDRG00005017684	MAF bZIP transcription factor K [Source:NCBI gene;Acc:105105862]
ETV7	ETV7	ENSCDRG00005011656	ETS variant transcription factor 7 [Source:NCBI gene;Acc:105101334]
TGIF2	TGIF2	ENSCDRG00005017363	TGFB induced factor homeobox 2 [Source:NCBI gene;Acc:105084981]
TP73	TP73	ENSCDRG00005014518	tumor protein p73 [Source:HGNC Symbol;Acc:HGNC:12003]
THAP2	THAP2	ENSCDRG00005017863	THAP domain containing 2 [Source:NCBI gene;Acc:105095998]
ZNF526	ZNF526	ENSCDRG00005017810	zinc finger protein 526 [Source:HGNC Symbol;Acc:HGNC:29415]
ZNF677	ENSCDRG00005001378	ENSCDRG00005001378	zinc finger protein 677-like [Source:NCBI gene;Acc:105091265]
PAX8	PAX8	ENSCDRG00005012432	paired box 8 [Source:NCBI gene;Acc:105104189]
MTERF2	MTERF2	ENSCDRG00005017725	mitochondrial transcription termination factor 2 [Source:NCBI gene;Acc:105102974]
NAIF1	NAIF1	ENSCDRG00005011787	nuclear apoptosis inducing factor 1 [Source:NCBI gene;Acc:105092589]
ZNF182	ZNF182	ENSCDRG00005016242	zinc finger protein 182 [Source:HGNC Symbol;Acc:HGNC:13001]
ZNF165	ZNF165	ENSCDRG00005005831	zinc finger protein 165 [Source:HGNC Symbol;Acc:HGNC:12953]
PURB	PURB	ENSCDRG00005002614	purine rich element binding protein B [Source:HGNC Symbol;Acc:HGNC:9702]
ZNF576	ZNF576	ENSCDRG00005005425	zinc finger protein 576 [Source:NCBI gene;Acc:105090239]
ZNF541	ZNF541	ENSCDRG00005001169	zinc finger protein 541 [Source:HGNC Symbol;Acc:HGNC:25294]
TSHZ3	TSHZ3	ENSCDRG00005021492	teashirt zinc finger homeobox 3 [Source:HGNC Symbol;Acc:HGNC:30700]
CTCFL	CTCFL	ENSCDRG00005018103	CCCTC-binding factor like [Source:HGNC Symbol;Acc:HGNC:16234]
EGR3	EGR3	ENSCDRG00005015507	early growth response 3 [Source:HGNC Symbol;Acc:HGNC:3240]
ZNF329	ZNF329	ENSCDRG00005009733	zinc finger protein 329 [Source:HGNC Symbol;Acc:HGNC:14209]
ZNF786	ENSCDRG00005012840	ENSCDRG00005012840	nan
ZBTB6	ZBTB6	ENSCDRG00005007683	zinc finger and BTB domain containing 6 [Source:NCBI gene;Acc:105092642]
ZMAT4	ZMAT4	ENSCDRG00005009014	zinc finger matrin-type 4 [Source:NCBI gene;Acc:105086422]
HNF1B	HNF1B	ENSCDRG00005009598	HNF1 homeobox B [Source:NCBI gene;Acc:105097858]
ZFP1	ZFP1	ENSCDRG00005013902	ZFP1 zinc finger protein [Source:HGNC Symbol;Acc:HGNC:23328]
PAX2	PAX2	ENSCDRG00005018578	paired box 2 [Source:NCBI gene;Acc:105084326]
SALL4	SALL4	ENSCDRG00005016240	spalt like transcription factor 4 [Source:HGNC Symbol;Acc:HGNC:15924]
MYC	MYC	ENSCDRG00005005140	MYC proto-oncogene, bHLH transcription factor [Source:NCBI gene;Acc:105096445]
ZNF668	ZNF668	ENSCDRG00005013032	zinc finger protein 668 [Source:NCBI gene;Acc:105102717]
IRX2	IRX2	ENSCDRG00005005106	iroquois homeobox 2 [Source:HGNC Symbol;Acc:HGNC:14359]
ZNF697	ZNF697	ENSCDRG00005002866	zinc finger protein 697 [Source:HGNC Symbol;Acc:HGNC:32034]
LHX5	LHX5	ENSCDRG00005014796	LIM homeobox 5 [Source:HGNC Symbol;Acc:HGNC:14216]
ZNF548	ENSCDRG00005010860	ENSCDRG00005010860	nan
MYBL2	MYBL2	ENSCDRG00005012214	MYB proto-oncogene like 2 [Source:NCBI gene;Acc:105087122]
ZNF771	ZNF771	ENSCDRG00005012888	zinc finger protein 771 [Source:HGNC Symbol;Acc:HGNC:29653]
ZNF497	ENSCDRG00005009999	ENSCDRG00005009999	nan
LHX6	LHX6	ENSCDRG00005009193	LIM homeobox 6 [Source:HGNC Symbol;Acc:HGNC:21735]
THAP6	THAP6	ENSCDRG00005000540	THAP domain containing 6 [Source:HGNC Symbol;Acc:HGNC:23189]
FOXN1	FOXN1	ENSCDRG00005014337	forkhead box N1 [Source:NCBI gene;Acc:105088185]
PGR	PGR	ENSCDRG00005000147	progesterone receptor [Source:HGNC Symbol;Acc:HGNC:8910]
IRF7	ENSCDRG00005008201	ENSCDRG00005008201	nan
DBX2	DBX2	ENSCDRG00005014422	developing brain homeobox 2 [Source:HGNC Symbol;Acc:HGNC:33186]
ZNF831	ZNF831	ENSCDRG00005019675	zinc finger protein 831 [Source:HGNC Symbol;Acc:HGNC:16167]
KLF11	KLF11	ENSCDRG00005021426	Kruppel like factor 11 [Source:NCBI gene;Acc:105091240]
ZNF614	ZNF614	ENSCDRG00005000836	zinc finger protein 614 [Source:HGNC Symbol;Acc:HGNC:24722]
ZNF322	ZNF322	ENSCDRG00005005278	zinc finger protein 322 [Source:NCBI gene;Acc:105089167]
NFIL3	NFIL3	ENSCDRG00005017210	nuclear factor, interleukin 3 regulated [Source:NCBI gene;Acc:105093600]
EGR2	EGR2	ENSCDRG00005014716	early growth response 2 [Source:NCBI gene;Acc:105093861]
ZNF449	ZNF449	ENSCDRG00005015299	zinc finger protein 449 [Source:NCBI gene;Acc:105104287]
ZNF750	ZNF750	ENSCDRG00005009187	zinc finger protein 750 [Source:HGNC Symbol;Acc:HGNC:25843]
ZNF649	ENSCDRG00005000676	ENSCDRG00005000676	nan
MYB	MYB	ENSCDRG00005018759	MYB proto-oncogene, transcription factor [Source:NCBI gene;Acc:105092030]
TBX2	TBX2	ENSCDRG00005005778	T-box transcription factor 2 [Source:HGNC Symbol;Acc:HGNC:11597]
ZNF354C	ZNF354C	ENSCDRG00005006750	zinc finger protein 354C [Source:NCBI gene;Acc:105100637]
ZNF81	ZNF81	ENSCDRG00005016226	zinc finger protein 81 [Source:HGNC Symbol;Acc:HGNC:13156]
ZNF620	ZNF620	ENSCDRG00005020120	zinc finger protein 620 [Source:HGNC Symbol;Acc:HGNC:28742]
IKZF1	ENSCDRG00005014861	ENSCDRG00005014861	nan
ESR1	ENSCDRG00005020770	ENSCDRG00005020770	nan
KLF16	ENSCDRG00005011721	ENSCDRG00005011721	nan
E2F8	E2F8	ENSCDRG00005010690	E2F transcription factor 8 [Source:NCBI gene;Acc:105095340]
ZNF177	ENSCDRG00005004057	ENSCDRG00005004057	nan
ANHX	ENSCDRG00005012234	ENSCDRG00005012234	nan
BCL11B	BCL11B	ENSCDRG00005002190	BAF chromatin remodeling complex subunit BCL11B [Source:HGNC Symbol;Acc:HGNC:13222]
POU2F3	POU2F3	ENSCDRG00005021288	POU class 2 homeobox 3 [Source:HGNC Symbol;Acc:HGNC:19864]
RARB	RARB	ENSCDRG00005003736	retinoic acid receptor beta [Source:NCBI gene;Acc:105095624]
ZNF674	ENSCDRG00005020827	ENSCDRG00005020827	nan
FOXM1	FOXM1	ENSCDRG00005022409	forkhead box M1 [Source:NCBI gene;Acc:105102948]
HIC1	HIC1	ENSCDRG00005009504	HIC ZBTB transcriptional repressor 1 [Source:HGNC Symbol;Acc:HGNC:4909]
ZNF596	ZNF596	ENSCDRG00005021702	zinc finger protein 596 [Source:HGNC Symbol;Acc:HGNC:27268]
CENPS	CENPS	ENSCDRG00005015858	centromere protein S [Source:NCBI gene;Acc:105107014]
SNAI1	SNAI1	ENSCDRG00005014607	snail family transcriptional repressor 1 [Source:NCBI gene;Acc:105087873]
AIRE	AIRE	ENSCDRG00005014671	autoimmune regulator [Source:HGNC Symbol;Acc:HGNC:360]
PAX4	PAX4	ENSCDRG00005005680	paired box 4 [Source:NCBI gene;Acc:105085429]
MYPOP	MYPOP	ENSCDRG00005011260	Myb related transcription factor, partner of profilin [Source:HGNC Symbol;Acc:HGNC:20178]
ZIC3	ZIC3	ENSCDRG00005011602	Zic family member 3 [Source:HGNC Symbol;Acc:HGNC:12874]
ZNF385B	ZNF385B	ENSCDRG00005005488	zinc finger protein 385B [Source:HGNC Symbol;Acc:HGNC:26332]
ALX3	ALX3	ENSCDRG00005001710	ALX homeobox 3 [Source:HGNC Symbol;Acc:HGNC:449]
TBX4	TBX4	ENSCDRG00005005700	T-box transcription factor 4 [Source:HGNC Symbol;Acc:HGNC:11603]
EMX2	EMX2	ENSCDRG00005016940	empty spiracles homeobox 2 [Source:HGNC Symbol;Acc:HGNC:3341]
EBF2	EBF2	ENSCDRG00005018634	EBF transcription factor 2 [Source:NCBI gene;Acc:105102372]
RXRG	RXRG	ENSCDRG00005004406	retinoid X receptor gamma [Source:NCBI gene;Acc:105092711]
HOXB3	HOXB3	ENSCDRG00005018104	homeobox B3 [Source:HGNC Symbol;Acc:HGNC:5114]
RAG1	RAG1	ENSCDRG00005014267	recombination activating 1 [Source:NCBI gene;Acc:105106824]
HSF4	HSF4	ENSCDRG00005009366	heat shock transcription factor 4 [Source:HGNC Symbol;Acc:HGNC:5227]
ZIC4	ZIC4	ENSCDRG00005013775	Zic family member 4 [Source:HGNC Symbol;Acc:HGNC:20393]
LMX1B	LMX1B	ENSCDRG00005015852	LIM homeobox transcription factor 1 beta [Source:HGNC Symbol;Acc:HGNC:6654]
BATF2	BATF2	ENSCDRG00005012539	basic leucine zipper ATF-like transcription factor 2 [Source:NCBI gene;Acc:105102625]
CEBPB	CEBPB	ENSCDRG00005014799	CCAAT enhancer binding protein beta [Source:HGNC Symbol;Acc:HGNC:1834]
TBX1	TBX1	ENSCDRG00005018736	T-box transcription factor 1 [Source:HGNC Symbol;Acc:HGNC:11592]
MYT1L	ENSCDRG00005014339	ENSCDRG00005014339	nan
TCFL5	TCFL5	ENSCDRG00005006962	transcription factor like 5 [Source:HGNC Symbol;Acc:HGNC:11646]
SPIC	SPIC	ENSCDRG00005015956	Spi-C transcription factor [Source:NCBI gene;Acc:105097454]
FOXA3	FOXA3	ENSCDRG00005011166	forkhead box A3 [Source:HGNC Symbol;Acc:HGNC:5023]
SOX15	SOX15	ENSCDRG00005008731	SRY-box transcription factor 15 [Source:HGNC Symbol;Acc:HGNC:11196]
PAX3	PAX3	ENSCDRG00005001926	paired box 3 [Source:NCBI gene;Acc:105098289]
ZXDC	ENSCDRG00005017119	ENSCDRG00005017119	nan
DLX1	DLX1	ENSCDRG00005000721	distal-less homeobox 1 [Source:NCBI gene;Acc:105091092]
ZNF385D	ZNF385D	ENSCDRG00005003324	zinc finger protein 385D [Source:HGNC Symbol;Acc:HGNC:26191]
YBX2	YBX2	ENSCDRG00005020806	Y-box binding protein 2 [Source:HGNC Symbol;Acc:HGNC:17948]
LHX9	LHX9	ENSCDRG00005012373	LIM homeobox 9 [Source:HGNC Symbol;Acc:HGNC:14222]
TEAD4	TEAD4	ENSCDRG00005022415	TEA domain transcription factor 4 [Source:HGNC Symbol;Acc:HGNC:11717]
FOXF1	FOXF1	ENSCDRG00005010196	forkhead box F1 [Source:HGNC Symbol;Acc:HGNC:3809]
RUNX3	RUNX3	ENSCDRG00005004492	RUNX family transcription factor 3 [Source:HGNC Symbol;Acc:HGNC:10473]
WT1	WT1	ENSCDRG00005019279	WT1 transcription factor [Source:HGNC Symbol;Acc:HGNC:12796]
MESP1	MESP1	ENSCDRG00005020745	mesoderm posterior bHLH transcription factor 1 [Source:HGNC Symbol;Acc:HGNC:29658]
TBX18	TBX18	ENSCDRG00005004740	T-box transcription factor 18 [Source:HGNC Symbol;Acc:HGNC:11595]
ZNF524	ZNF524	ENSCDRG00005008933	zinc finger protein 524 [Source:HGNC Symbol;Acc:HGNC:28322]
ZBTB32	ZBTB32	ENSCDRG00005014936	zinc finger and BTB domain containing 32 [Source:NCBI gene;Acc:105088050]
ZNF285	ZNF285	ENSCDRG00005005793	zinc finger protein 285 [Source:HGNC Symbol;Acc:HGNC:13079]
MEOX2	MEOX2	ENSCDRG00005005125	mesenchyme homeobox 2 [Source:HGNC Symbol;Acc:HGNC:7014]
ZFP69	ZFP69	ENSCDRG00005014364	ZFP69 zinc finger protein [Source:NCBI gene;Acc:105103376]
SOX7	SOX7	ENSCDRG00005010045	SRY-box transcription factor 7 [Source:HGNC Symbol;Acc:HGNC:18196]
ZNF175	ENSCDRG00005000365	ENSCDRG00005000365	nan
PCGF6	PCGF6	ENSCDRG00005012063	polycomb group ring finger 6 [Source:HGNC Symbol;Acc:HGNC:21156]
EHF	EHF	ENSCDRG00005017510	ETS homologous factor [Source:HGNC Symbol;Acc:HGNC:3246]
NR4A3	NR4A3	ENSCDRG00005015259	nuclear receptor subfamily 4 group A member 3 [Source:HGNC Symbol;Acc:HGNC:7982]
PAX7	PAX7	ENSCDRG00005006031	paired box 7 [Source:HGNC Symbol;Acc:HGNC:8621]
GATA1	GATA1	ENSCDRG00005017373	GATA binding protein 1 [Source:NCBI gene;Acc:105103306]
RFX6	RFX6	ENSCDRG00005002698	regulatory factor X6 [Source:NCBI gene;Acc:105088337]
ZFP30	ENSCDRG00005011104	ENSCDRG00005011104	nan
FOXP3	FOXP3	ENSCDRG00005019325	forkhead box P3 [Source:HGNC Symbol;Acc:HGNC:6106]
GATA4	GATA4	ENSCDRG00005010642	GATA binding protein 4 [Source:NCBI gene;Acc:105101923]
PHOX2A	PHOX2A	ENSCDRG00005000943	paired like homeobox 2A [Source:HGNC Symbol;Acc:HGNC:691]
PDX1	PDX1	ENSCDRG00005003496	pancreatic and duodenal homeobox 1 [Source:HGNC Symbol;Acc:HGNC:6107]
LIN28A	LIN28A	ENSCDRG00005005930	lin-28 homolog A [Source:NCBI gene;Acc:105100688]
HDX	HDX	ENSCDRG00005021225	highly divergent homeobox [Source:NCBI gene;Acc:105097178]
ZIC5	ZIC5	ENSCDRG00005018041	Zic family member 5 [Source:HGNC Symbol;Acc:HGNC:20322]
PLSCR1	ENSCDRG00005013279	ENSCDRG00005013279	nan
KLF13	ENSCDRG00005004122	ENSCDRG00005004122	nan
SOX17	SOX17	ENSCDRG00005020040	SRY-box transcription factor 17 [Source:HGNC Symbol;Acc:HGNC:18122]
EBF1	ENSCDRG00005000046	ENSCDRG00005000046	nan
E2F2	E2F2	ENSCDRG00005018277	E2F transcription factor 2 [Source:HGNC Symbol;Acc:HGNC:3114]
POU5F2	POU5F2	ENSCDRG00005013944	POU domain class 5, transcription factor 2 [Source:HGNC Symbol;Acc:HGNC:26367]
FAM170A	FAM170A	ENSCDRG00005005051	family with sequence similarity 170 member A [Source:NCBI gene;Acc:105102450]
BATF3	BATF3	ENSCDRG00005018273	basic leucine zipper ATF-like transcription factor 3 [Source:NCBI gene;Acc:105099305]
FEZF1	FEZF1	ENSCDRG00005004315	FEZ family zinc finger 1 [Source:HGNC Symbol;Acc:HGNC:22788]
GLIS1	GLIS1	ENSCDRG00005009662	GLIS family zinc finger 1 [Source:HGNC Symbol;Acc:HGNC:29525]
CEBPA	CEBPA	ENSCDRG00005017974	CCAAT enhancer binding protein alpha [Source:HGNC Symbol;Acc:HGNC:1833]
NKX2-1	ENSCDRG00005017830	ENSCDRG00005017830	NK2 homeobox 1 [Source:HGNC Symbol;Acc:HGNC:11825]
ZBTB8B	ENSCDRG00005020621	ENSCDRG00005020621	nan
MSC	MSC	ENSCDRG00005010164	musculin [Source:HGNC Symbol;Acc:HGNC:7321]
TFAP2C	TFAP2C	ENSCDRG00005017528	transcription factor AP-2 gamma [Source:HGNC Symbol;Acc:HGNC:11744]
ZNF345	ZNF345	ENSCDRG00005002179	zinc finger protein 345 [Source:HGNC Symbol;Acc:HGNC:16367]
HOXB5	HOXB5	ENSCDRG00005018055	homeobox B5 [Source:HGNC Symbol;Acc:HGNC:5116]
HOXC10	HOXC10	ENSCDRG00005004457	homeobox C10 [Source:HGNC Symbol;Acc:HGNC:5122]
ZNF296	ZNF296	ENSCDRG00005006724	zinc finger protein 296 [Source:HGNC Symbol;Acc:HGNC:15981]
SIM2	SIM2	ENSCDRG00005006306	SIM bHLH transcription factor 2 [Source:HGNC Symbol;Acc:HGNC:10883]
THAP8	THAP8	ENSCDRG00005011678	THAP domain containing 8 [Source:HGNC Symbol;Acc:HGNC:23191]
ETV2	ETV2	ENSCDRG00005015103	ETS variant transcription factor 2 [Source:HGNC Symbol;Acc:HGNC:3491]
E2F7	E2F7	ENSCDRG00005015968	E2F transcription factor 7 [Source:NCBI gene;Acc:105095973]
TFAP2B	TFAP2B	ENSCDRG00005009426	transcription factor AP-2 beta [Source:HGNC Symbol;Acc:HGNC:11743]
ZNF692	ENSCDRG00005007466	ENSCDRG00005007466	nan
IRX3	IRX3	ENSCDRG00005001552	iroquois homeobox 3 [Source:HGNC Symbol;Acc:HGNC:14360]
PAX5	PAX5	ENSCDRG00005001265	paired box 5 [Source:NCBI gene;Acc:105102268]
TERB1	TERB1	ENSCDRG00005006615	telomere repeat binding bouquet formation protein 1 [Source:NCBI gene;Acc:105093778]
ZSCAN9	ZSCAN9	ENSCDRG00005005922	zinc finger and SCAN domain containing 9 [Source:NCBI gene;Acc:105084556]
HHEX	HHEX	ENSCDRG00005015775	hematopoietically expressed homeobox [Source:HGNC Symbol;Acc:HGNC:4901]
CEBPG	CEBPG	ENSCDRG00005017885	CCAAT enhancer binding protein gamma [Source:NCBI gene;Acc:105096716]
LHX8	LHX8	ENSCDRG00005011024	LIM homeobox 8 [Source:HGNC Symbol;Acc:HGNC:28838]
FOSL1	FOSL1	ENSCDRG00005017990	FOS like 1, AP-1 transcription factor subunit [Source:NCBI gene;Acc:105102580]
OSR2	OSR2	ENSCDRG00005010609	odd-skipped related transciption factor 2 [Source:NCBI gene;Acc:105090544]
POU2AF1	POU2AF1	ENSCDRG00005021927	POU class 2 homeobox associating factor 1 [Source:NCBI gene;Acc:105093986]
NR5A1	NR5A1	ENSCDRG00005006378	nuclear receptor subfamily 5 group A member 1 [Source:NCBI gene;Acc:105092634]
GRHL2	GRHL2	ENSCDRG00005015641	grainyhead like transcription factor 2 [Source:NCBI gene;Acc:105090533]
PBX4	PBX4	ENSCDRG00005011358	PBX homeobox 4 [Source:HGNC Symbol;Acc:HGNC:13403]
THAP1	THAP1	ENSCDRG00005018753	THAP domain containing 1 [Source:NCBI gene;Acc:105094304]
EOMES	EOMES	ENSCDRG00005009669	eomesodermin [Source:HGNC Symbol;Acc:HGNC:3372]
STAT4	STAT4	ENSCDRG00005014639	signal transducer and activator of transcription 4 [Source:NCBI gene;Acc:105088786]
IRX5	IRX5	ENSCDRG00005001574	iroquois homeobox 5 [Source:HGNC Symbol;Acc:HGNC:14361]
ETV3L	ETV3L	ENSCDRG00005016634	ETS variant transcription factor 3 like [Source:NCBI gene;Acc:105105623]
FOXA2	FOXA2	ENSCDRG00005019700	forkhead box A2 [Source:HGNC Symbol;Acc:HGNC:5022]
FOXB1	FOXB1	ENSCDRG00005010590	forkhead box B1 [Source:NCBI gene;Acc:105102141]
NPAS4	NPAS4	ENSCDRG00005016371	neuronal PAS domain protein 4 [Source:NCBI gene;Acc:105104460]
HNF4G	HNF4G	ENSCDRG00005013295	hepatocyte nuclear factor 4 gamma [Source:HGNC Symbol;Acc:HGNC:5026]
MEOX1	MEOX1	ENSCDRG00005012880	mesenchyme homeobox 1 [Source:NCBI gene;Acc:105101037]
CEBPE	CEBPE	ENSCDRG00005009995	CCAAT enhancer binding protein epsilon [Source:NCBI gene;Acc:105096983]
TBX19	TBX19	ENSCDRG00005008159	T-box transcription factor 19 [Source:NCBI gene;Acc:105092734]
LHX4	LHX4	ENSCDRG00005011304	LIM homeobox 4 [Source:HGNC Symbol;Acc:HGNC:21734]
HOXB7	HOXB7	ENSCDRG00005018007	homeobox B7 [Source:NCBI gene;Acc:105095782]
TFAP2D	TFAP2D	ENSCDRG00005009248	transcription factor AP-2 delta [Source:HGNC Symbol;Acc:HGNC:15581]
HLX	HLX	ENSCDRG00005018290	H2.0 like homeobox [Source:HGNC Symbol;Acc:HGNC:4978]
PRDM14	PRDM14	ENSCDRG00005021157	PR/SET domain 14 [Source:NCBI gene;Acc:105103894]
NKX3-1	NKX3-1	ENSCDRG00005016364	NK3 homeobox 1 [Source:HGNC Symbol;Acc:HGNC:7838]
ZNF528 // ZNF83 // ZNF880	ENSCDRG00005001338	ENSCDRG00005001338	nan
ONECUT1	ONECUT1	ENSCDRG00005016311	one cut homeobox 1 [Source:HGNC Symbol;Acc:HGNC:8138]
DLX5	DLX5	ENSCDRG00005002916	distal-less homeobox 5 [Source:HGNC Symbol;Acc:HGNC:2918]
GCM1	GCM1	ENSCDRG00005012750	glial cells missing transcription factor 1 [Source:NCBI gene;Acc:105099538]
TBPL2	TBPL2	ENSCDRG00005002602	TATA-box binding protein like 2 [Source:NCBI gene;Acc:105091446]
GSX2	ENSCDRG00005002178	ENSCDRG00005002178	nan
RBPJL	RBPJL	ENSCDRG00005014489	recombination signal binding protein for immunoglobulin kappa J region like [Source:NCBI gene;Acc:105087818]
AHRR	ENSCDRG00005014008	ENSCDRG00005014008	nan
HOXC8	HOXC8	ENSCDRG00005004419	homeobox C8 [Source:HGNC Symbol;Acc:HGNC:5129]
NR5A2	NR5A2	ENSCDRG00005011572	nuclear receptor subfamily 5 group A member 2 [Source:HGNC Symbol;Acc:HGNC:7984]
EGR4	EGR4	ENSCDRG00005004141	early growth response 4 [Source:HGNC Symbol;Acc:HGNC:3241]
TFAP2A	TFAP2A	ENSCDRG00005011950	transcription factor AP-2 alpha [Source:HGNC Symbol;Acc:HGNC:11742]
ONECUT2	ONECUT2	ENSCDRG00005020043	one cut homeobox 2 [Source:HGNC Symbol;Acc:HGNC:8139]
MSX2	MSX2	ENSCDRG00005004133	msh homeobox 2 [Source:HGNC Symbol;Acc:HGNC:7392]
GBX2	GBX2	ENSCDRG00005014059	gastrulation brain homeobox 2 [Source:HGNC Symbol;Acc:HGNC:4186]
HESX1	HESX1	ENSCDRG00005017529	HESX homeobox 1 [Source:NCBI gene;Acc:105089790]
NKX2-6	ENSCDRG00005016389	ENSCDRG00005016389	nan
ASCL3	ASCL3	ENSCDRG00005009806	achaete-scute family bHLH transcription factor 3 [Source:NCBI gene;Acc:105093989]
VSX2	VSX2	ENSCDRG00005000228	visual system homeobox 2 [Source:NCBI gene;Acc:105086111]
IRX6	IRX6	ENSCDRG00005001597	iroquois homeobox 6 [Source:HGNC Symbol;Acc:HGNC:14675]
PROP1	PROP1	ENSCDRG00005007026	PROP paired-like homeobox 1 [Source:NCBI gene;Acc:105106108]
ALX4	ALX4	ENSCDRG00005012645	ALX homeobox 4 [Source:HGNC Symbol;Acc:HGNC:450]
CREB3L3	CREB3L3	ENSCDRG00005004679	cAMP responsive element binding protein 3 like 3 [Source:HGNC Symbol;Acc:HGNC:18855]
ZNF683	ZNF683	ENSCDRG00005005912	zinc finger protein 683 [Source:NCBI gene;Acc:105100686]
ELF3	ELF3	ENSCDRG00005020134	E74 like ETS transcription factor 3 [Source:NCBI gene;Acc:105103113]
ARID3C	ARID3C	ENSCDRG00005020175	AT-rich interaction domain 3C [Source:HGNC Symbol;Acc:HGNC:21209]
OTX2	OTX2	ENSCDRG00005003304	orthodenticle homeobox 2 [Source:NCBI gene;Acc:105091455]
NR1H4	NR1H4	ENSCDRG00005017007	nuclear receptor subfamily 1 group H member 4 [Source:HGNC Symbol;Acc:HGNC:7967]
NR0B1	NR0B1	ENSCDRG00005009532	nuclear receptor subfamily 0 group B member 1 [Source:HGNC Symbol;Acc:HGNC:7960]
TBX6	TBX6	ENSCDRG00005009554	T-box transcription factor 6 [Source:HGNC Symbol;Acc:HGNC:11605]
PITX1	PITX1	ENSCDRG00005002357	paired like homeodomain 1 [Source:HGNC Symbol;Acc:HGNC:9004]
BRF2	BRF2	ENSCDRG00005015581	BRF2 RNA polymerase III transcription initiation factor subunit [Source:HGNC Symbol;Acc:HGNC:17298]
TBX20	TBX20	ENSCDRG00005004357	T-box transcription factor 20 [Source:HGNC Symbol;Acc:HGNC:11598]
DMRTC2	DMRTC2	ENSCDRG00005018727	DMRT like family C2 [Source:HGNC Symbol;Acc:HGNC:13911]
HOXB6	HOXB6	ENSCDRG00005018029	homeobox B6 [Source:HGNC Symbol;Acc:HGNC:5117]
SOX21	SOX21	ENSCDRG00005013161	SRY-box transcription factor 21 [Source:HGNC Symbol;Acc:HGNC:11197]
TCF21	TCF21	ENSCDRG00005021553	transcription factor 21 [Source:NCBI gene;Acc:105096360]
POU5F1 // POU5F1B	ENSCDRG00005019992	ENSCDRG00005019992	nan
HOXA9	ENSCDRG00005001067	ENSCDRG00005001067	nan
OSR1	OSR1	ENSCDRG00005005052	odd-skipped related transcription factor 1 [Source:NCBI gene;Acc:105092988]
PAX9	PAX9	ENSCDRG00005017915	paired box 9 [Source:HGNC Symbol;Acc:HGNC:8623]
SIX4	SIX4	ENSCDRG00005005329	SIX homeobox 4 [Source:HGNC Symbol;Acc:HGNC:10890]
HES6	HES6	ENSCDRG00005016419	hes family bHLH transcription factor 6 [Source:HGNC Symbol;Acc:HGNC:18254]
NPAS1	NPAS1	ENSCDRG00005000700	neuronal PAS domain protein 1 [Source:HGNC Symbol;Acc:HGNC:7894]
HOXC4	HOXC4	ENSCDRG00005004352	homeobox C4 [Source:HGNC Symbol;Acc:HGNC:5126]
NEUROD4	NEUROD4	ENSCDRG00005010411	neuronal differentiation 4 [Source:NCBI gene;Acc:105100994]
ARID5B	ENSCDRG00005014475	ENSCDRG00005014475	nan
OTX1	OTX1	ENSCDRG00005005204	orthodenticle homeobox 1 [Source:HGNC Symbol;Acc:HGNC:8521]
ZNF501	ZNF501	ENSCDRG00005004300	zinc finger protein 501 [Source:NCBI gene;Acc:105091310]
BARX1	ENSCDRG00005017094	ENSCDRG00005017094	BARX homeobox 1 [Source:NCBI gene;Acc:105084677]
PLAG1	PLAG1	ENSCDRG00005020252	PLAG1 zinc finger [Source:NCBI gene;Acc:105097052]
HOXC11	HOXC11	ENSCDRG00005004473	homeobox C11 [Source:HGNC Symbol;Acc:HGNC:5123]
MEF2B	ENSCDRG00005012755	ENSCDRG00005012755	myocyte enhancer factor 2B [Source:HGNC Symbol;Acc:HGNC:6995]
LMX1A	LMX1A	ENSCDRG00005004381	LIM homeobox transcription factor 1 alpha [Source:HGNC Symbol;Acc:HGNC:6653]
MSX1	MSX1	ENSCDRG00005000274	msh homeobox 1 [Source:HGNC Symbol;Acc:HGNC:7391]
DLX6	DLX6	ENSCDRG00005002890	distal-less homeobox 6 [Source:HGNC Symbol;Acc:HGNC:2919]
HES7	HES7	ENSCDRG00005013805	hes family bHLH transcription factor 7 [Source:HGNC Symbol;Acc:HGNC:15977]
ZBED2	ZBED2	ENSCDRG00005017049	zinc finger BED-type containing 2 [Source:HGNC Symbol;Acc:HGNC:20710]
IRF6	IRF6	ENSCDRG00005019267	interferon regulatory factor 6 [Source:NCBI gene;Acc:105099326]
ISX	ISX	ENSCDRG00005020112	intestine specific homeobox [Source:HGNC Symbol;Acc:HGNC:28084]
TBX21	TBX21	ENSCDRG00005018980	T-box transcription factor 21 [Source:HGNC Symbol;Acc:HGNC:11599]
ZSCAN22	ENSCDRG00005009939	ENSCDRG00005009939	nan
CENPA	CENPA	ENSCDRG00005013201	centromere protein A [Source:HGNC Symbol;Acc:HGNC:1851]
MYCN	ENSCDRG00005004697	ENSCDRG00005004697	nan
FOXG1	ENSCDRG00005013058	ENSCDRG00005013058	nan
HOXC6	HOXC6	ENSCDRG00005004401	homeobox C6 [Source:NCBI gene;Acc:105094548]
NEUROD6	NEUROD6	ENSCDRG00005002913	neuronal differentiation 6 [Source:NCBI gene;Acc:105095854]
HSF5	HSF5	ENSCDRG00005022170	heat shock transcription factor 5 [Source:HGNC Symbol;Acc:HGNC:26862]
ZNF891	ZNF891	ENSCDRG00005020110	zinc finger protein 891 [Source:HGNC Symbol;Acc:HGNC:38709]
DRGX	DRGX	ENSCDRG00005016072	dorsal root ganglia homeobox [Source:NCBI gene;Acc:105093437]
MAFF	MAFF	ENSCDRG00005011815	MAF bZIP transcription factor F [Source:HGNC Symbol;Acc:HGNC:6780]
HMX2	HMX2	ENSCDRG00005007291	H6 family homeobox 2 [Source:HGNC Symbol;Acc:HGNC:5018]
FOXI1	FOXI1	ENSCDRG00005006523	forkhead box I1 [Source:HGNC Symbol;Acc:HGNC:3815]
BHLHA9	BHLHA9	ENSCDRG00005015178	basic helix-loop-helix family member a9 [Source:HGNC Symbol;Acc:HGNC:35126]
CRX	CRX	ENSCDRG00005001324	cone-rod homeobox [Source:NCBI gene;Acc:105098926]
BNC1	BNC1	ENSCDRG00005016432	basonuclin 1 [Source:HGNC Symbol;Acc:HGNC:1081]
MESP2	MESP2	ENSCDRG00005020753	mesoderm posterior bHLH transcription factor 2 [Source:HGNC Symbol;Acc:HGNC:29659]
TBX22	TBX22	ENSCDRG00005021148	T-box transcription factor 22 [Source:NCBI gene;Acc:105093742]
GBX1	GBX1	ENSCDRG00005010890	gastrulation brain homeobox 1 [Source:HGNC Symbol;Acc:HGNC:4185]
ZSCAN10	ZSCAN10	ENSCDRG00005018626	zinc finger and SCAN domain containing 10 [Source:HGNC Symbol;Acc:HGNC:12997]
NOBOX	NOBOX	ENSCDRG00005008289	NOBOX oogenesis homeobox [Source:NCBI gene;Acc:105095056]
FOXA1	FOXA1	ENSCDRG00005018167	forkhead box A1 [Source:HGNC Symbol;Acc:HGNC:5021]
DPRX	DPRX	ENSCDRG00005002083	divergent-paired related homeobox [Source:NCBI gene;Acc:105091280]
POU4F3	POU4F3	ENSCDRG00005006464	POU class 4 homeobox 3 [Source:NCBI gene;Acc:105097763]
POU5F1 // POU5F1B	ENSCDRG00005019105	ENSCDRG00005019105	nan
FOXH1	FOXH1	ENSCDRG00005018195	forkhead box H1 [Source:NCBI gene;Acc:105104986]
HOXA3	HOXA3	ENSCDRG00005000976	homeobox A3 [Source:HGNC Symbol;Acc:HGNC:5104]
ZNF268	ENSCDRG00005020312	ENSCDRG00005020312	nan
MYF6	MYF6	ENSCDRG00005009281	myogenic factor 6 [Source:HGNC Symbol;Acc:HGNC:7566]
ZBTB3	ZBTB3	ENSCDRG00005005155	zinc finger and BTB domain containing 3 [Source:HGNC Symbol;Acc:HGNC:22918]
ZNF391	ZNF391	ENSCDRG00005005460	zinc finger protein 391 [Source:NCBI gene;Acc:105106212]
SEBOX	SEBOX	ENSCDRG00005014870	SEBOX homeobox [Source:HGNC Symbol;Acc:HGNC:32942]
FEV	FEV	ENSCDRG00005000093	FEV transcription factor, ETS family member [Source:HGNC Symbol;Acc:HGNC:18562]
OVOL1	OVOL1	ENSCDRG00005004438	ovo like transcriptional repressor 1 [Source:HGNC Symbol;Acc:HGNC:8525]
NEUROG2	NEUROG2	ENSCDRG00005007881	neurogenin 2 [Source:HGNC Symbol;Acc:HGNC:13805]
SOX30	ENSCDRG00005000206	ENSCDRG00005000206	nan
PROX2	ENSCDRG00005000746	ENSCDRG00005000746	nan
IKZF3	IKZF3	ENSCDRG00005005535	IKAROS family zinc finger 3 [Source:NCBI gene;Acc:105099037]
ZNF488	ZNF488	ENSCDRG00005014182	zinc finger protein 488 [Source:NCBI gene;Acc:105104965]
HOXD11	HOXD11	ENSCDRG00005002440	homeobox D11 [Source:HGNC Symbol;Acc:HGNC:5134]
LIN28B	LIN28B	ENSCDRG00005011271	lin-28 homolog B [Source:NCBI gene;Acc:105097142]
ISL1	ISL1	ENSCDRG00005011661	ISL LIM homeobox 1 [Source:HGNC Symbol;Acc:HGNC:6132]
BATF	BATF	ENSCDRG00005001210	basic leucine zipper ATF-like transcription factor [Source:NCBI gene;Acc:105086083]
ESR1	ENSCDRG00005020779	ENSCDRG00005020779	nan
ZBTB44	ENSCDRG00005007297	ENSCDRG00005007297	nan
BARHL2	BARHL2	ENSCDRG00005003080	BarH like homeobox 2 [Source:HGNC Symbol;Acc:HGNC:954]
DMRT2	DMRT2	ENSCDRG00005003248	doublesex and mab-3 related transcription factor 2 [Source:NCBI gene;Acc:105105850]
GFI1	GFI1	ENSCDRG00005002667	growth factor independent 1 transcriptional repressor [Source:HGNC Symbol;Acc:HGNC:4237]
ZBTB42	ZBTB42	ENSCDRG00005000448	zinc finger and BTB domain containing 42 [Source:HGNC Symbol;Acc:HGNC:32550]
HOXD8	HOXD8	ENSCDRG00005002477	homeobox D8 [Source:HGNC Symbol;Acc:HGNC:5139]
DLX3	DLX3	ENSCDRG00005011379	distal-less homeobox 3 [Source:NCBI gene;Acc:105104828]
ASCL1	ASCL1	ENSCDRG00005009930	achaete-scute family bHLH transcription factor 1 [Source:HGNC Symbol;Acc:HGNC:738]
UNCX	ENSCDRG00005017942	ENSCDRG00005017942	nan
DMBX1	DMBX1	ENSCDRG00005019026	diencephalon/mesencephalon homeobox 1 [Source:HGNC Symbol;Acc:HGNC:19026]
DBX1	DBX1	ENSCDRG00005009814	developing brain homeobox 1 [Source:HGNC Symbol;Acc:HGNC:33185]
ZNF581	ZNF581	ENSCDRG00005009068	zinc finger protein 581 [Source:NCBI gene;Acc:105098756]
SHOX2	SHOX2	ENSCDRG00005002041	short stature homeobox 2 [Source:HGNC Symbol;Acc:HGNC:10854]
MXD3	ENSCDRG00005009604	ENSCDRG00005009604	MAX dimerization protein 3 [Source:HGNC Symbol;Acc:HGNC:14008]
SPZ1	SPZ1	ENSCDRG00005018521	spermatogenic leucine zipper 1 [Source:NCBI gene;Acc:105084833]
IRX4	IRX4	ENSCDRG00005005132	iroquois homeobox 4 [Source:HGNC Symbol;Acc:HGNC:6129]
HOXA11	HOXA11	ENSCDRG00005001112	homeobox A11 [Source:HGNC Symbol;Acc:HGNC:5101]
SPDEF	SPDEF	ENSCDRG00005004153	SAM pointed domain containing ETS transcription factor [Source:HGNC Symbol;Acc:HGNC:17257]
ONECUT3	ONECUT3	ENSCDRG00005009294	one cut homeobox 3 [Source:HGNC Symbol;Acc:HGNC:13399]
SIX1	SIX1	ENSCDRG00005005305	SIX homeobox 1 [Source:NCBI gene;Acc:105086220]
NEUROD1	NEUROD1	ENSCDRG00005006119	neuronal differentiation 1 [Source:NCBI gene;Acc:105098758]
ELF5	ELF5	ENSCDRG00005017592	E74 like ETS transcription factor 5 [Source:HGNC Symbol;Acc:HGNC:3320]
IRF4	IRF4	ENSCDRG00005013862	interferon regulatory factor 4 [Source:NCBI gene;Acc:105086054]
VSX1	VSX1	ENSCDRG00005019387	visual system homeobox 1 [Source:HGNC Symbol;Acc:HGNC:12723]
ZBED3	ZBED3	ENSCDRG00005000608	zinc finger BED-type containing 3 [Source:HGNC Symbol;Acc:HGNC:20711]
HOXA1	HOXA1	ENSCDRG00005000950	homeobox A1 [Source:NCBI gene;Acc:105102134]
ZNF426	ENSCDRG00005003955	ENSCDRG00005003955	nan
MYOD1	MYOD1	ENSCDRG00005014006	myogenic differentiation 1 [Source:HGNC Symbol;Acc:HGNC:7611]
ZNF367	ZNF367	ENSCDRG00005017980	zinc finger protein 367 [Source:HGNC Symbol;Acc:HGNC:18320]
NR2E3	NR2E3	ENSCDRG00005013043	nuclear receptor subfamily 2 group E member 3 [Source:HGNC Symbol;Acc:HGNC:7974]
SOX14	SOX14	ENSCDRG00005015122	SRY-box transcription factor 14 [Source:NCBI gene;Acc:105086294]
NFE2	NFE2	ENSCDRG00005004200	nuclear factor, erythroid 2 [Source:HGNC Symbol;Acc:HGNC:7780]
FOXB2	ENSCDRG00005012196	ENSCDRG00005012196	nan
FOXD4 // FOXD4L1 // FOXD4L4 // FOXD4L3 // FOXD4L5 // FOXD4L6	ENSCDRG00005002664	ENSCDRG00005002664	nan
HOXB1	HOXB1	ENSCDRG00005018147	homeobox B1 [Source:NCBI gene;Acc:105095785]
PITX2	PITX2	ENSCDRG00005008309	paired like homeodomain 2 [Source:NCBI gene;Acc:105089908]
ZNF432	ENSCDRG00005000686	ENSCDRG00005000686	nan
GFI1B	GFI1B	ENSCDRG00005003865	growth factor independent 1B transcriptional repressor [Source:NCBI gene;Acc:105085182]
TFEC	TFEC	ENSCDRG00005001818	transcription factor EC [Source:HGNC Symbol;Acc:HGNC:11754]
NKX2-3	NKX2-3	ENSCDRG00005003725	NK2 homeobox 3 [Source:HGNC Symbol;Acc:HGNC:7836]
ZNF157	ENSCDRG00005015734	ENSCDRG00005015734	nan
NKX1-2	ENSCDRG00005006736	ENSCDRG00005006736	NK1 homeobox 2 [Source:HGNC Symbol;Acc:HGNC:31652]
ZNF268	ENSCDRG00005007713	ENSCDRG00005007713	nan
NR1I2	NR1I2	ENSCDRG00005010792	nuclear receptor subfamily 1 group I member 2 [Source:HGNC Symbol;Acc:HGNC:7968]
NRL	NRL	ENSCDRG00005015387	neural retina leucine zipper [Source:HGNC Symbol;Acc:HGNC:8002]
DMRTA1	DMRTA1	ENSCDRG00005001683	DMRT like family A1 [Source:HGNC Symbol;Acc:HGNC:13826]
ASCL4	ASCL4	ENSCDRG00005016253	achaete-scute family bHLH transcription factor 4 [Source:HGNC Symbol;Acc:HGNC:24311]
ZNF648	ZNF648	ENSCDRG00005013424	zinc finger protein 648 [Source:HGNC Symbol;Acc:HGNC:18190]
SNAI3	SNAI3	ENSCDRG00005020562	snail family transcriptional repressor 3 [Source:HGNC Symbol;Acc:HGNC:18411]
NKX1-1	NKX1-1	ENSCDRG00005005367	NK1 homeobox 1 [Source:HGNC Symbol;Acc:HGNC:24975]
HIC2	ENSCDRG00005021967	ENSCDRG00005021967	nan
ZGLP1	ENSCDRG00005006783	ENSCDRG00005006783	nan
NKX6-3	NKX6-3	ENSCDRG00005020343	NK6 homeobox 3 [Source:HGNC Symbol;Acc:HGNC:26328]
GATA5	GATA5	ENSCDRG00005006581	GATA binding protein 5 [Source:HGNC Symbol;Acc:HGNC:15802]
NEUROD2	NEUROD2	ENSCDRG00005004578	neuronal differentiation 2 [Source:HGNC Symbol;Acc:HGNC:7763]
PRDM6	PRDM6	ENSCDRG00005004531	PR/SET domain 6 [Source:HGNC Symbol;Acc:HGNC:9350]
HOXA10	HOXA10	ENSCDRG00005001092	homeobox A10 [Source:HGNC Symbol;Acc:HGNC:5100]
PA2G4	ENSCDRG00005005251	ENSCDRG00005005251	nan
ZNF607	ENSCDRG00005002224	ENSCDRG00005002224	nan
TLX2	TLX2	ENSCDRG00005006934	T cell leukemia homeobox 2 [Source:HGNC Symbol;Acc:HGNC:5057]
HMX3	HMX3	ENSCDRG00005007324	H6 family homeobox 3 [Source:HGNC Symbol;Acc:HGNC:5019]
NANOG	ENSCDRG00005021352	ENSCDRG00005021352	Nanog homeobox [Source:NCBI gene;Acc:105098175]
DMRTA2	DMRTA2	ENSCDRG00005004641	DMRT like family A2 [Source:HGNC Symbol;Acc:HGNC:13908]
TIGD3	TIGD3	ENSCDRG00005009809	tigger transposable element derived 3 [Source:HGNC Symbol;Acc:HGNC:18334]
HAND1	HAND1	ENSCDRG00005001057	heart and neural crest derivatives expressed 1 [Source:HGNC Symbol;Acc:HGNC:4807]
KLF17	KLF17	ENSCDRG00005012704	Kruppel like factor 17 [Source:NCBI gene;Acc:105090933]
GATA6	GATA6	ENSCDRG00005019876	GATA binding protein 6 [Source:HGNC Symbol;Acc:HGNC:4174]
BARHL1	BARHL1	ENSCDRG00005004416	BarH like homeobox 1 [Source:HGNC Symbol;Acc:HGNC:953]
FOXI3	FOXI3	ENSCDRG00005013319	forkhead box I3 [Source:HGNC Symbol;Acc:HGNC:35123]
ERF	ENSCDRG00005006108	ENSCDRG00005006108	nan
PLSCR1	ENSCDRG00005013196	ENSCDRG00005013196	nan
HAND2	ENSCDRG00005011915	ENSCDRG00005011915	nan
HOXD9	HOXD9	ENSCDRG00005002467	homeobox D9 [Source:HGNC Symbol;Acc:HGNC:5140]
KLF14	ENSCDRG00005001303	ENSCDRG00005001303	nan
TFCP2L1	TFCP2L1	ENSCDRG00005011155	transcription factor CP2 like 1 [Source:HGNC Symbol;Acc:HGNC:17925]
LHX1	LHX1	ENSCDRG00005007226	LIM homeobox 1 [Source:HGNC Symbol;Acc:HGNC:6593]
FIGLA	FIGLA	ENSCDRG00005010856	folliculogenesis specific bHLH transcription factor [Source:HGNC Symbol;Acc:HGNC:24669]
MYOG	MYOG	ENSCDRG00005022070	myogenin [Source:HGNC Symbol;Acc:HGNC:7612]
ALX1	ALX1	ENSCDRG00005005138	ALX homeobox 1 [Source:NCBI gene;Acc:105084881]
SP9	SP9	ENSCDRG00005001817	Sp9 transcription factor [Source:HGNC Symbol;Acc:HGNC:30690]
TCF23	TCF23	ENSCDRG00005007579	transcription factor 23 [Source:NCBI gene;Acc:105098532]
HOXD3	HOXD3	ENSCDRG00005002512	homeobox D3 [Source:HGNC Symbol;Acc:HGNC:5137]
HOXA5	HOXA5	ENSCDRG00005001022	homeobox A5 [Source:HGNC Symbol;Acc:HGNC:5106]
SIX2	SIX2	ENSCDRG00005022173	SIX homeobox 2 [Source:HGNC Symbol;Acc:HGNC:10888]
HOXD12	HOXD12	ENSCDRG00005002432	homeobox D12 [Source:HGNC Symbol;Acc:HGNC:5135]
EMX1	EMX1	ENSCDRG00005018536	empty spiracles homeobox 1 [Source:HGNC Symbol;Acc:HGNC:3340]
SIX6	SIX6	ENSCDRG00005005287	SIX homeobox 6 [Source:NCBI gene;Acc:105086221]
NKX2-5	NKX2-5	ENSCDRG00005004925	NK2 homeobox 5 [Source:NCBI gene;Acc:105089367]
OVOL2	OVOL2	ENSCDRG00005004167	ovo like zinc finger 2 [Source:HGNC Symbol;Acc:HGNC:15804]
NEUROG3	NEUROG3	ENSCDRG00005007536	neurogenin 3 [Source:NCBI gene;Acc:105099879]
HOXD10	HOXD10	ENSCDRG00005002456	homeobox D10 [Source:HGNC Symbol;Acc:HGNC:5133]
PITX3	PITX3	ENSCDRG00005014430	paired like homeodomain 3 [Source:HGNC Symbol;Acc:HGNC:9006]
NOTO	NOTO	ENSCDRG00005003672	notochord homeobox [Source:HGNC Symbol;Acc:HGNC:31839]
NKX2-8	NKX2-8	ENSCDRG00005017891	NK2 homeobox 8 [Source:HGNC Symbol;Acc:HGNC:16364]
POU1F1	POU1F1	ENSCDRG00005003277	POU class 1 homeobox 1 [Source:NCBI gene;Acc:105087767]
DLX4	DLX4	ENSCDRG00005011355	distal-less homeobox 4 [Source:HGNC Symbol;Acc:HGNC:2917]
MNX1	MNX1	ENSCDRG00005015149	motor neuron and pancreas homeobox 1 [Source:HGNC Symbol;Acc:HGNC:4979]
GSC	GSC	ENSCDRG00005001518	goosecoid homeobox [Source:HGNC Symbol;Acc:HGNC:4612]
AHRR	ENSCDRG00005014135	ENSCDRG00005014135	nan
FOXI2	FOXI2	ENSCDRG00005004278	forkhead box I2 [Source:HGNC Symbol;Acc:HGNC:32448]
HOXC13	HOXC13	ENSCDRG00005004494	homeobox C13 [Source:HGNC Symbol;Acc:HGNC:5125]
OVOL3	OVOL3	ENSCDRG00005011414	ovo like zinc finger 3 [Source:HGNC Symbol;Acc:HGNC:14186]
HOXC9	HOXC9	ENSCDRG00005004435	homeobox C9 [Source:HGNC Symbol;Acc:HGNC:5130]
HES3	HES3	ENSCDRG00005016251	hes family bHLH transcription factor 3 [Source:HGNC Symbol;Acc:HGNC:26226]
TBXT	TBXT	ENSCDRG00005009061	T-box transcription factor T [Source:HGNC Symbol;Acc:HGNC:11515]
HOXB9	HOXB9	ENSCDRG00005017862	homeobox B9 [Source:HGNC Symbol;Acc:HGNC:5120]
EVX2	EVX2	ENSCDRG00005002358	even-skipped homeobox 2 [Source:HGNC Symbol;Acc:HGNC:3507]
IRF7	ENSCDRG00005018765	ENSCDRG00005018765	nan
TLX1	TLX1	ENSCDRG00005018131	T cell leukemia homeobox 1 [Source:HGNC Symbol;Acc:HGNC:5056]
HOXB2	HOXB2	ENSCDRG00005018121	homeobox B2 [Source:HGNC Symbol;Acc:HGNC:5113]
DMRT3	DMRT3	ENSCDRG00005003237	doublesex and mab-3 related transcription factor 3 [Source:HGNC Symbol;Acc:HGNC:13909]
MYF5	MYF5	ENSCDRG00005009235	myogenic factor 5 [Source:HGNC Symbol;Acc:HGNC:7565]
PRDM13	PRDM13	ENSCDRG00005014704	PR/SET domain 13 [Source:HGNC Symbol;Acc:HGNC:13998]
CDX4	CDX4	ENSCDRG00005020715	caudal type homeobox 4 [Source:HGNC Symbol;Acc:HGNC:1808]
TWIST1	TWIST1	ENSCDRG00005005895	twist family bHLH transcription factor 1 [Source:HGNC Symbol;Acc:HGNC:12428]
HOXD13	HOXD13	ENSCDRG00005002411	homeobox D13 [Source:HGNC Symbol;Acc:HGNC:5136]
POU3F4	POU3F4	ENSCDRG00005021206	POU class 3 homeobox 4 [Source:NCBI gene;Acc:105095303]
NEUROG1	NEUROG1	ENSCDRG00005002289	neurogenin 1 [Source:HGNC Symbol;Acc:HGNC:7764]
HOXA7	HOXA7	ENSCDRG00005001043	homeobox A7 [Source:HGNC Symbol;Acc:HGNC:5108]
LHX3	LHX3	ENSCDRG00005001876	LIM homeobox 3 [Source:HGNC Symbol;Acc:HGNC:6595]
BSX	BSX	ENSCDRG00005013454	brain specific homeobox [Source:NCBI gene;Acc:105094531]
NKX3-2	NKX3-2	ENSCDRG00005020825	NK3 homeobox 2 [Source:HGNC Symbol;Acc:HGNC:951]
SCRT2	SCRT2	ENSCDRG00005013980	scratch family transcriptional repressor 2 [Source:HGNC Symbol;Acc:HGNC:15952]
SP6	SP6	ENSCDRG00005018791	Sp6 transcription factor [Source:NCBI gene;Acc:105106953]
ZNF33A // ZNF33B	ENSCDRG00005018008	ENSCDRG00005018008	nan
ZNF705A	ENSCDRG00005021330	ENSCDRG00005021330	Camelus dromedarius zinc finger protein 705A-like (LOC116149250), mRNA. Sequence ID: XM_031440421.1
TLX3	TLX3	ENSCDRG00005005878	T cell leukemia homeobox 3 [Source:HGNC Symbol;Acc:HGNC:13532]
FOXR1	FOXR1	ENSCDRG00005020447	forkhead box R1 [Source:NCBI gene;Acc:105090158]
TIGD6	TIGD6	ENSCDRG00005002431	tigger transposable element derived 6 [Source:NCBI gene;Acc:105097030]
ZNF443 // ZNF563 // ZNF799 // ZNF700 // ZNF441 // ZNF44 // ZNF823 // ZNF442 // ZNF878	ENSCDRG00005022234	ENSCDRG00005022234	nan
ATOH7	ATOH7	ENSCDRG00005016787	atonal bHLH transcription factor 7 [Source:HGNC Symbol;Acc:HGNC:13907]
CDX2	ENSCDRG00005003530	ENSCDRG00005003530	nan
DUXA	DUXA	ENSCDRG00005012947	double homeobox A [Source:HGNC Symbol;Acc:HGNC:32179]
NHLH1	NHLH1	ENSCDRG00005014066	nescient helix-loop-helix 1 [Source:NCBI gene;Acc:105100133]
HOXC5	HOXC5	ENSCDRG00005004372	homeobox C5 [Source:HGNC Symbol;Acc:HGNC:5127]
NKX6-1	ENSCDRG00005004541	ENSCDRG00005004541	nan
SP8	SP8	ENSCDRG00005006175	Sp8 transcription factor [Source:HGNC Symbol;Acc:HGNC:19196]
FERD3L	FERD3L	ENSCDRG00005005910	Fer3 like bHLH transcription factor [Source:NCBI gene;Acc:105092893]
DLX2	DLX2	ENSCDRG00005000738	distal-less homeobox 2 [Source:HGNC Symbol;Acc:HGNC:2915]
LBX2	LBX2	ENSCDRG00005006852	ladybird homeobox 2 [Source:NCBI gene;Acc:105105956]
HOXD4	HOXD4	ENSCDRG00005002497	homeobox D4 [Source:HGNC Symbol;Acc:HGNC:5138]
HOXA6	HOXA6	ENSCDRG00005001033	homeobox A6 [Source:NCBI gene;Acc:105102135]
FOXR2	FOXR2	ENSCDRG00005011115	forkhead box R2 [Source:NCBI gene;Acc:105093066]
PTF1A	PTF1A	ENSCDRG00005017662	pancreas associated transcription factor 1a [Source:HGNC Symbol;Acc:HGNC:23734]
DMRT1	ENSCDRG00005003226	ENSCDRG00005003226	doublesex and mab-3 related transcription factor 1 [Source:HGNC Symbol;Acc:HGNC:2934]
RAX2	RAX2	ENSCDRG00005005226	retina and anterior neural fold homeobox 2 [Source:NCBI gene;Acc:105102646]
LBX1	LBX1	ENSCDRG00005018112	ladybird homeobox 1 [Source:HGNC Symbol;Acc:HGNC:16960]
HOXB13	HOXB13	ENSCDRG00005017741	homeobox B13 [Source:NCBI gene;Acc:105095779]
ISL2	ISL2	ENSCDRG00005019501	ISL LIM homeobox 2 [Source:HGNC Symbol;Acc:HGNC:18524]
GSX1	GSX1	ENSCDRG00005003464	GS homeobox 1 [Source:HGNC Symbol;Acc:HGNC:20374]
FOXL1	FOXL1	ENSCDRG00005009782	forkhead box L1 [Source:HGNC Symbol;Acc:HGNC:3817]
HES2	HES2	ENSCDRG00005007081	hes family bHLH transcription factor 2 [Source:NCBI gene;Acc:105100261]
POU4F1	POU4F1	ENSCDRG00005009798	POU class 4 homeobox 1 [Source:HGNC Symbol;Acc:HGNC:9218]
ASCL2	ASCL2	ENSCDRG00005021008	achaete-scute family bHLH transcription factor 2 [Source:HGNC Symbol;Acc:HGNC:739]
HOXC12	HOXC12	ENSCDRG00005004486	homeobox C12 [Source:HGNC Symbol;Acc:HGNC:5124]
FOXD3	FOXD3	ENSCDRG00005003471	forkhead box D3 [Source:HGNC Symbol;Acc:HGNC:3804]
TCF15	TCF15	ENSCDRG00005014056	transcription factor 15 [Source:NCBI gene;Acc:105100804]
KLF1	KLF1	ENSCDRG00005022188	Kruppel like factor 1 [Source:HGNC Symbol;Acc:HGNC:6345]
PAX1	PAX1	ENSCDRG00005019717	paired box 1 [Source:HGNC Symbol;Acc:HGNC:8615]
VENTX	VENTX	ENSCDRG00005002508	VENT homeobox [Source:HGNC Symbol;Acc:HGNC:13639]
EVX1	ENSCDRG00005001177	ENSCDRG00005001177	nan
ZSCAN32	ENSCDRG00005006463	ENSCDRG00005006463	nan
TCF24	TCF24	ENSCDRG00005020969	transcription factor 24 [Source:HGNC Symbol;Acc:HGNC:32275]
BHLHE23	BHLHE23	ENSCDRG00005007231	basic helix-loop-helix family member e23 [Source:HGNC Symbol;Acc:HGNC:16093]
MSGN1	MSGN1	ENSCDRG00005004972	mesogenin 1 [Source:NCBI gene;Acc:105105856]
ZFP42	ENSCDRG00005020608	ENSCDRG00005020608	nan
TAL2	TAL2	ENSCDRG00005012027	TAL bHLH transcription factor 2 [Source:NCBI gene;Acc:105087955]
HELT	HELT	ENSCDRG00005014948	helt bHLH transcription factor [Source:NCBI gene;Acc:105084437]
OLIG3	OLIG3	ENSCDRG00005014653	oligodendrocyte transcription factor 3 [Source:NCBI gene;Acc:105092041]
HOXA13	HOXA13	ENSCDRG00005001129	homeobox A13 [Source:HGNC Symbol;Acc:HGNC:5102]
PRRX2	PRRX2	ENSCDRG00005000450	paired related homeobox 2 [Source:HGNC Symbol;Acc:HGNC:21338]
ATOH1	ATOH1	ENSCDRG00005009854	atonal bHLH transcription factor 1 [Source:HGNC Symbol;Acc:HGNC:797]
POU4F2	POU4F2	ENSCDRG00005019973	POU class 4 homeobox 2 [Source:HGNC Symbol;Acc:HGNC:9219]
ZNF780A	ENSCDRG00005010028	ENSCDRG00005010028	nan
MAFA	MAFA	ENSCDRG00005014370	MAF bZIP transcription factor A [Source:HGNC Symbol;Acc:HGNC:23145]
MIXL1	MIXL1	ENSCDRG00005003819	Mix paired-like homeobox [Source:HGNC Symbol;Acc:HGNC:13363]
TWIST2	TWIST2	ENSCDRG00005016712	twist family bHLH transcription factor 2 [Source:HGNC Symbol;Acc:HGNC:20670]
ZNF80	ZNF80	ENSCDRG00005012883	zinc finger protein 80 [Source:NCBI gene;Acc:105093234]
TGIF2LX // TGIF2LY	ENSCDRG00005021401	ENSCDRG00005021401	nan
EN2	EN2	ENSCDRG00005014291	engrailed homeobox 2 [Source:HGNC Symbol;Acc:HGNC:3343]
SP5	SP5	ENSCDRG00005000112	Sp5 transcription factor [Source:HGNC Symbol;Acc:HGNC:14529]

## Sheet: b
Classification of camel SON basal genes - peptides
camel_ensembl_ids	camel_external_gene_names	camel_descriptions
ENSCDRG00005011041	PSAP	prosaposin [Source:NCBI gene;Acc:105092487]
ENSCDRG00005005574	HSP90AA1	heat shock protein 90 alpha family class A member 1 [Source:HGNC Symbol;Acc:HGNC:5253]
ENSCDRG00005000511	APP	amyloid beta precursor protein [Source:NCBI gene;Acc:105086807]
ENSCDRG00005018821	C3	complement C3 [Source:NCBI gene;Acc:105104550]
ENSCDRG00005016031	HSP90AB1	heat shock protein 90 alpha family class B member 1 [Source:NCBI gene;Acc:105088639]
ENSCDRG00005012287	CALM3	calmodulin 2 [Source:NCBI gene;Acc:105092364]
ENSCDRG00005014204	AGT	angiotensinogen [Source:NCBI gene;Acc:105104282]
ENSCDRG00005008476	LRP4	LDL receptor related protein 4 [Source:HGNC Symbol;Acc:HGNC:6696]
ENSCDRG00005022330	CALM2	calmodulin 2 [Source:NCBI gene;Acc:105092364]
ENSCDRG00005009803	VWF	von Willebrand factor [Source:HGNC Symbol;Acc:HGNC:12726]
ENSCDRG00005011753	PDYN	prodynorphin [Source:NCBI gene;Acc:105096049]
ENSCDRG00005017560	Pcsk1n	proprotein convertase subtilisin/kexin type 1 inhibitor [Source:HGNC Symbol;Acc:HGNC:17301]
ENSCDRG00005019340	TIMP2	TIMP metallopeptidase inhibitor 2 [Source:HGNC Symbol;Acc:HGNC:11821]
ENSCDRG00005008571	Chgb	chromogranin B [Source:NCBI gene;Acc:105101363]
ENSCDRG00005002844	HTT	huntingtin [Source:HGNC Symbol;Acc:HGNC:4851]
ENSCDRG00005012212	NCAN	neurocan [Source:NCBI gene;Acc:105103716]
ENSCDRG00005004942	CNTN1	contactin 1 [Source:NCBI gene;Acc:105084699]
ENSCDRG00005012848	COPA	coatomer protein complex subunit alpha [Source:HGNC Symbol;Acc:HGNC:2230]
ENSCDRG00005020154	CTNNB1	catenin beta 1 [Source:HGNC Symbol;Acc:HGNC:2514]
ENSCDRG00005004339	CALM1	calmodulin 2 [Source:NCBI gene;Acc:105092364]
ENSCDRG00005004625	COL4A1	collagen type IV alpha 1 chain [Source:HGNC Symbol;Acc:HGNC:2202]
ENSCDRG00005015818	TIMP3	TIMP metallopeptidase inhibitor 3 [Source:NCBI gene;Acc:105101079]
ENSCDRG00005004891	AGRN	agrin [Source:HGNC Symbol;Acc:HGNC:329]
ENSCDRG00005013800	LRRC4B	leucine rich repeat containing 4B [Source:HGNC Symbol;Acc:HGNC:25042]
ENSCDRG00005011499	GAS6	growth arrest specific 6 [Source:HGNC Symbol;Acc:HGNC:4168]
ENSCDRG00005011897	HSPD1	heat shock protein family D (Hsp60) member 1 [Source:NCBI gene;Acc:105088805]
ENSCDRG00005009200	PRNP	prion protein [Source:NCBI gene;Acc:105101461]
ENSCDRG00005019316	LGALS3BP	galectin 3 binding protein [Source:NCBI gene;Acc:105105801]
ENSCDRG00005007782	SPP1	secreted phosphoprotein 1 [Source:NCBI gene;Acc:105091573]
ENSCDRG00005019363	Dlc1	DLC1 Rho GTPase activating protein [Source:NCBI gene;Acc:105102357]
ENSCDRG00005000734	CHGA	chromogranin A [Source:HGNC Symbol;Acc:HGNC:1929]
ENSCDRG00005020900	YARS1	tyrosyl-tRNA synthetase 1 [Source:NCBI gene;Acc:105085782]
ENSCDRG00005008111	FN1	fibronectin 1 [Source:NCBI gene;Acc:105086605]
ENSCDRG00005015728	RAC1	Rac family small GTPase 1 [Source:HGNC Symbol;Acc:HGNC:9801]
ENSCDRG00005014790	VGF	VGF nerve growth factor inducible [Source:HGNC Symbol;Acc:HGNC:12684]
ENSCDRG00005017594	NRG1	neuregulin 1 [Source:NCBI gene;Acc:105095803]
ENSCDRG00005012316	COL1A1	collagen type I alpha 1 chain [Source:HGNC Symbol;Acc:HGNC:2197]
ENSCDRG00005007630	FGF1	fibroblast growth factor 1 [Source:HGNC Symbol;Acc:HGNC:3665]
ENSCDRG00005010161	COL3A1	collagen type III alpha 1 chain [Source:HGNC Symbol;Acc:HGNC:2201]
ENSCDRG00005015143	VEGFA	vascular endothelial growth factor A [Source:HGNC Symbol;Acc:HGNC:12680]
ENSCDRG00005022001	MIF	macrophage migration inhibitory factor [Source:HGNC Symbol;Acc:HGNC:7097]
ENSCDRG00005019854	FBN1	fibrillin 1 [Source:NCBI gene;Acc:105104860]
ENSCDRG00005001805	CSF1	colony stimulating factor 1 [Source:NCBI gene;Acc:105085658]
ENSCDRG00005001638	MMP2	matrix metallopeptidase 2 [Source:HGNC Symbol;Acc:HGNC:7166]
ENSCDRG00005008327	RAC3	Rac family small GTPase 3 [Source:HGNC Symbol;Acc:HGNC:9803]
ENSCDRG00005000348	VCAM1	vascular cell adhesion molecule 1 [Source:NCBI gene;Acc:105084935]
ENSCDRG00005007626	RARRES2	retinoic acid receptor responder 2 [Source:NCBI gene;Acc:105085207]
ENSCDRG00005018496	VEGFB	vascular endothelial growth factor B [Source:HGNC Symbol;Acc:HGNC:12681]
ENSCDRG00005003101	PROS1	protein S [Source:HGNC Symbol;Acc:HGNC:9456]
ENSCDRG00005009608	EFNB3	ephrin B3 [Source:NCBI gene;Acc:105103009]
ENSCDRG00005016190	TGFB1	transforming growth factor beta 1 [Source:HGNC Symbol;Acc:HGNC:11766]
ENSCDRG00005003364	TRH	thyrotropin releasing hormone [Source:HGNC Symbol;Acc:HGNC:12298]
ENSCDRG00005009429	LGALS1	galectin 1 [Source:HGNC Symbol;Acc:HGNC:6561]
ENSCDRG00005006763	CFLAR	CASP8 and FADD like apoptosis regulator [Source:NCBI gene;Acc:105099179]
ENSCDRG00005017083	CNTN5	contactin 5 [Source:HGNC Symbol;Acc:HGNC:2175]
ENSCDRG00005006128	CNTN4	contactin 4 [Source:HGNC Symbol;Acc:HGNC:2174]
ENSCDRG00005010525	HEBP1	heme binding protein 1 [Source:NCBI gene;Acc:105094250]
ENSCDRG00005018618	PDGFA	platelet derived growth factor subunit A [Source:HGNC Symbol;Acc:HGNC:8799]
ENSCDRG00005020315	KREMEN1	kringle containing transmembrane protein 1 [Source:HGNC Symbol;Acc:HGNC:17550]
ENSCDRG00005016484	SFRP2	secreted frizzled related protein 2 [Source:NCBI gene;Acc:105104142]
ENSCDRG00005005902	CNTN3	contactin 3 [Source:NCBI gene;Acc:105095276]
ENSCDRG00005006166	RB1	RB transcriptional corepressor 1 [Source:HGNC Symbol;Acc:HGNC:9884]
ENSCDRG00005009222	NPB	neuropeptide B [Source:HGNC Symbol;Acc:HGNC:30099]
ENSCDRG00005014617	ARHGDIB	Rho GDP dissociation inhibitor beta [Source:HGNC Symbol;Acc:HGNC:679]
ENSCDRG00005000515	ANXA1	annexin A1 [Source:NCBI gene;Acc:105106132]
ENSCDRG00005001697	PDGFD	platelet derived growth factor D [Source:HGNC Symbol;Acc:HGNC:30620]
ENSCDRG00005002319	PTN	pleiotrophin [Source:NCBI gene;Acc:105091620]
ENSCDRG00005004159	GDF11	growth differentiation factor 11 [Source:HGNC Symbol;Acc:HGNC:4216]
ENSCDRG00005017945	CXCL12	C-X-C motif chemokine ligand 12 [Source:NCBI gene;Acc:105084484]
ENSCDRG00005016816	TGFB2	transforming growth factor beta 2 [Source:NCBI gene;Acc:105100091]
ENSCDRG00005000068	DLL4	delta like canonical Notch ligand 4 [Source:NCBI gene;Acc:105096864]
ENSCDRG00005005284	EFNA1	ephrin A1 [Source:HGNC Symbol;Acc:HGNC:3221]
ENSCDRG00005014824	BMP5	bone morphogenetic protein 5 [Source:NCBI gene;Acc:105102117]
ENSCDRG00005007779	TNFSF12	TNF superfamily member 12 [Source:NCBI gene;Acc:105103023]
ENSCDRG00005020281	HBEGF	heparin binding EGF like growth factor [Source:NCBI gene;Acc:105098108]
ENSCDRG00005011611	TNFSF10	TNF superfamily member 10 [Source:NCBI gene;Acc:105085942]
ENSCDRG00005001558	TGFB3	transforming growth factor beta 3 [Source:NCBI gene;Acc:105086078]
ENSCDRG00005010583	TGFA	transforming growth factor alpha [Source:HGNC Symbol;Acc:HGNC:11765]
ENSCDRG00005011065	WIF1	WNT inhibitory factor 1 [Source:NCBI gene;Acc:105101101]
ENSCDRG00005013910	PDGFB	platelet derived growth factor subunit B [Source:NCBI gene;Acc:105091934]
ENSCDRG00005016018	WNT5A	Wnt family member 5A [Source:NCBI gene;Acc:105089783]
ENSCDRG00005011215	COL2A1	collagen type II alpha 1 chain [Source:NCBI gene;Acc:105103802]
ENSCDRG00005018771	CCL8	C-C motif chemokine ligand 8 [Source:NCBI gene;Acc:105088230]
ENSCDRG00005017580	BMP7	bone morphogenetic protein 7 [Source:HGNC Symbol;Acc:HGNC:1074]
ENSCDRG00005014185	WNT4	Wnt family member 4 [Source:HGNC Symbol;Acc:HGNC:12783]
ENSCDRG00005019383	NRG4	neuregulin 4 [Source:NCBI gene;Acc:105087221]
ENSCDRG00005013351	NMB	neuromedin B [Source:NCBI gene;Acc:105094707]
ENSCDRG00005020332	PENK	proenkephalin [Source:NCBI gene;Acc:105097049]
ENSCDRG00005003917	CX3CL1	C-X3-C motif chemokine ligand 1 [Source:HGNC Symbol;Acc:HGNC:10647]
ENSCDRG00005007384	Sst	somatostatin [Source:NCBI gene;Acc:105085836]
ENSCDRG00005007115	FRZB	frizzled related protein [Source:NCBI gene;Acc:105098896]
ENSCDRG00005006079	CNTN6	contactin 6 [Source:HGNC Symbol;Acc:HGNC:2176]
ENSCDRG00005005604	Flrt3	fibronectin leucine rich transmembrane protein 3 [Source:NCBI gene;Acc:105088313]
ENSCDRG00005013846	ANGPT4	angiopoietin 4 [Source:HGNC Symbol;Acc:HGNC:487]
ENSCDRG00005008913	SFRP1	secreted frizzled related protein 1 [Source:HGNC Symbol;Acc:HGNC:10776]
ENSCDRG00005019251	HGF	hepatocyte growth factor [Source:HGNC Symbol;Acc:HGNC:4893]
ENSCDRG00005014695	EFNB1	ephrin B1 [Source:NCBI gene;Acc:105087963]
ENSCDRG00005008716	EFNA5	ephrin A5 [Source:HGNC Symbol;Acc:HGNC:3225]
ENSCDRG00005011340	IL1B	interleukin 1 beta [Source:NCBI gene;Acc:105093155]
ENSCDRG00005012180	WNT7B	Wnt family member 7B [Source:HGNC Symbol;Acc:HGNC:12787]
ENSCDRG00005006653	PDGFC	platelet derived growth factor C [Source:NCBI gene;Acc:105101177]
ENSCDRG00005021518	KITLG	KIT ligand [Source:NCBI gene;Acc:105094866]
ENSCDRG00005007206	WNT9A	Wnt family member 9A [Source:HGNC Symbol;Acc:HGNC:12778]
ENSCDRG00005005116	ALOX5AP	arachidonate 5-lipoxygenase activating protein [Source:NCBI gene;Acc:105086596]
ENSCDRG00005021140	ANGPT1	angiopoietin 1 [Source:NCBI gene;Acc:105090509]
ENSCDRG00005000818	PGF	placental growth factor [Source:NCBI gene;Acc:105086095]
ENSCDRG00005002412	BMP3	bone morphogenetic protein 3 [Source:HGNC Symbol;Acc:HGNC:1070]
ENSCDRG00005002528	LGALS3	galectin 3 [Source:NCBI gene;Acc:105091443]
ENSCDRG00005004049	EFNB2	ephrin B2 [Source:NCBI gene;Acc:105094089]
ENSCDRG00005007136	WNT3A	Wnt family member 3A [Source:HGNC Symbol;Acc:HGNC:15983]
ENSCDRG00005008742	EGF	epidermal growth factor [Source:NCBI gene;Acc:105089905]
ENSCDRG00005000739	WNT2B	Wnt family member 2B [Source:HGNC Symbol;Acc:HGNC:12781]
ENSCDRG00005020348	CLUL1	clusterin like 1 [Source:NCBI gene;Acc:105086203]
ENSCDRG00005005262	EFNA3	ephrin A3 [Source:HGNC Symbol;Acc:HGNC:3223]
ENSCDRG00005021356	ANGPT2	angiopoietin 2 [Source:HGNC Symbol;Acc:HGNC:485]
ENSCDRG00005008769	ANGPTL1	angiopoietin like 1 [Source:HGNC Symbol;Acc:HGNC:489]
ENSCDRG00005016649	ADM2	adrenomedullin 2 [Source:NCBI gene;Acc:105090350]
ENSCDRG00005003414	THPO	thrombopoietin [Source:NCBI gene;Acc:105085874]
ENSCDRG00005006651	ICAM1	intercellular adhesion molecule 1 [Source:NCBI gene;Acc:105087642]
ENSCDRG00005010829	FST	follistatin [Source:HGNC Symbol;Acc:HGNC:3971]
ENSCDRG00005013281	SFRP4	secreted frizzled related protein 4 [Source:NCBI gene;Acc:105097359]
ENSCDRG00005007879	TNFSF13	TNF superfamily member 13 [Source:NCBI gene;Acc:105103021]
ENSCDRG00005022334	WNT5B	Wnt family member 5B [Source:HGNC Symbol;Acc:HGNC:16265]
ENSCDRG00005021212	VEGFC	vascular endothelial growth factor C [Source:HGNC Symbol;Acc:HGNC:12682]
ENSCDRG00005011609	INHBA	inhibin subunit beta A [Source:HGNC Symbol;Acc:HGNC:6066]
ENSCDRG00005018365	IAPP	islet amyloid polypeptide [Source:HGNC Symbol;Acc:HGNC:5329]
ENSCDRG00005011738	C5	complement C5 [Source:HGNC Symbol;Acc:HGNC:1331]
ENSCDRG00005002167	BMP4	bone morphogenetic protein 4 [Source:NCBI gene;Acc:105091431]
ENSCDRG00005020582	NDP	norrin cystine knot growth factor NDP [Source:NCBI gene;Acc:105085266]
ENSCDRG00005019815	PNOC	prepronociceptin [Source:HGNC Symbol;Acc:HGNC:9163]
ENSCDRG00005009920	MANSC1	MANSC domain containing 1 [Source:NCBI gene;Acc:105094239]
ENSCDRG00005004471	WNT7A	Wnt family member 7A [Source:HGNC Symbol;Acc:HGNC:12786]
ENSCDRG00005015961	TIMP1	TIMP metallopeptidase inhibitor 1 [Source:HGNC Symbol;Acc:HGNC:11820]
ENSCDRG00005004151	TNFSF13B	TNF superfamily member 13b [Source:HGNC Symbol;Acc:HGNC:11929]
ENSCDRG00005007423	FLT3LG	fms related tyrosine kinase 3 ligand [Source:HGNC Symbol;Acc:HGNC:3766]
ENSCDRG00005021938	TNFSF14	TNF superfamily member 14 [Source:HGNC Symbol;Acc:HGNC:11930]
ENSCDRG00005012168	IL1RN	interleukin 1 receptor antagonist [Source:NCBI gene;Acc:105104190]
ENSCDRG00005016611	TAC3	tachykinin precursor 3 [Source:HGNC Symbol;Acc:HGNC:11521]
ENSCDRG00005016102	FGB	fibrinogen beta chain [Source:NCBI gene;Acc:105089288]
ENSCDRG00005000828	HBB	hemoglobin subunit beta [Source:NCBI gene;Acc:105097953]
ENSCDRG00005014451	EDN1	endothelin 1 [Source:NCBI gene;Acc:105102504]
ENSCDRG00005014535	TNFSF8	TNF superfamily member 8 [Source:NCBI gene;Acc:105103746]
ENSCDRG00005020973	IGF2	insulin like growth factor 2 [Source:NCBI gene;Acc:105106402]
ENSCDRG00005009091	F2	coagulation factor II, thrombin [Source:HGNC Symbol;Acc:HGNC:3535]
ENSCDRG00005014210	FGF10	fibroblast growth factor 10 [Source:NCBI gene;Acc:105107148]
ENSCDRG00005004287	PROC	protein C, inactivator of coagulation factors Va and VIIIa [Source:HGNC Symbol;Acc:HGNC:9451]
ENSCDRG00005018347	INHBC	inhibin subunit beta C [Source:NCBI gene;Acc:105100349]
ENSCDRG00005016672	ANGPTL7	angiopoietin like 7 [Source:NCBI gene;Acc:105107023]
ENSCDRG00005007154	ADIPOQ	adiponectin, C1Q and collagen domain containing [Source:NCBI gene;Acc:105085843]
ENSCDRG00005017087	TIMP4	TIMP metallopeptidase inhibitor 4 [Source:NCBI gene;Acc:105093104]
ENSCDRG00005022350	IL18	interleukin 18 [Source:NCBI gene;Acc:105094167]
ENSCDRG00005003363	WNT9B	Wnt family member 9B [Source:HGNC Symbol;Acc:HGNC:12779]
ENSCDRG00005001267	RSPO3	R-spondin 3 [Source:NCBI gene;Acc:105096323]
ENSCDRG00005014849	EDA	ectodysplasin A [Source:HGNC Symbol;Acc:HGNC:3157]
ENSCDRG00005016708	CXCL16	C-X-C motif chemokine ligand 16 [Source:HGNC Symbol;Acc:HGNC:16642]
ENSCDRG00005005109	NTS	neurotensin [Source:NCBI gene;Acc:105084878]
ENSCDRG00005012251	INHBB	inhibin subunit beta B [Source:HGNC Symbol;Acc:HGNC:6067]
ENSCDRG00005019583	FGF7	fibroblast growth factor 7 [Source:NCBI gene;Acc:105104761]
ENSCDRG00005003858	CCL22	C-C motif chemokine ligand 22 [Source:NCBI gene;Acc:105093823]
ENSCDRG00005005282	IL33	interleukin 33 [Source:NCBI gene;Acc:105100405]
ENSCDRG00005011294	IL1A	interleukin 1 alpha [Source:NCBI gene;Acc:105093151]
ENSCDRG00005010126	IGF1	insulin like growth factor 1 [Source:NCBI gene;Acc:105097468]
ENSCDRG00005013333	TNFSF18	TNF superfamily member 18 [Source:NCBI gene;Acc:105092771]
ENSCDRG00005009718	TFPI	tissue factor pathway inhibitor [Source:NCBI gene;Acc:105099010]
ENSCDRG00005011415	BMP6	bone morphogenetic protein 6 [Source:HGNC Symbol;Acc:HGNC:1073]
ENSCDRG00005011301	CCL16	C-C motif chemokine ligand 16 [Source:HGNC Symbol;Acc:HGNC:10614]
ENSCDRG00005002983	IL17B	interleukin 17B [Source:NCBI gene;Acc:105097036]
ENSCDRG00005004734	CD274	CD274 molecule [Source:NCBI gene;Acc:105100414]
ENSCDRG00005017333	ANGPTL3	angiopoietin like 3 [Source:NCBI gene;Acc:105096282]
ENSCDRG00005007327	HAMP	hepcidin antimicrobial peptide [Source:NCBI gene;Acc:105088036]
ENSCDRG00005001706	INHA	inhibin subunit alpha [Source:NCBI gene;Acc:105096123]
ENSCDRG00005000136	SPINT1	serine peptidase inhibitor, Kunitz type 1 [Source:HGNC Symbol;Acc:HGNC:11246]
ENSCDRG00005020011	CXCL8	C-X-C motif chemokine ligand 8 [Source:NCBI gene;Acc:105091344]
ENSCDRG00005020186	LTA	lymphotoxin alpha [Source:NCBI gene;Acc:105087474]
ENSCDRG00005000075	WNT10A	Wnt family member 10A [Source:HGNC Symbol;Acc:HGNC:13829]
ENSCDRG00005018362	INHBE	inhibin subunit beta E [Source:NCBI gene;Acc:105100347]
ENSCDRG00005000063	WNT6	Wnt family member 6 [Source:HGNC Symbol;Acc:HGNC:12785]
ENSCDRG00005010053	CRLF1	cytokine receptor like factor 1 [Source:HGNC Symbol;Acc:HGNC:2364]
ENSCDRG00005016991	GIP	gastric inhibitory polypeptide [Source:HGNC Symbol;Acc:HGNC:4270]
ENSCDRG00005012098	EFNA2	ephrin A2 [Source:HGNC Symbol;Acc:HGNC:3222]
ENSCDRG00005018431	GNRH1	gonadotropin releasing hormone 1 [Source:NCBI gene;Acc:105102403]
ENSCDRG00005000308	AREG	amphiregulin [Source:HGNC Symbol;Acc:HGNC:651]
ENSCDRG00005005676	FGF18	fibroblast growth factor 18 [Source:HGNC Symbol;Acc:HGNC:3674]
ENSCDRG00005008086	RAC2	Rac family small GTPase 2 [Source:NCBI gene;Acc:105101582]
ENSCDRG00005015107	GHRL	ghrelin and obestatin prepropeptide [Source:HGNC Symbol;Acc:HGNC:18129]
ENSCDRG00005022134	NOG	noggin [Source:HGNC Symbol;Acc:HGNC:7866]
ENSCDRG00005001466	MMP13	matrix metallopeptidase 13 [Source:NCBI gene;Acc:105087166]
ENSCDRG00005020197	TNF	Camelus dromedarius tumor necrosis factor (TNF), mRNA. [Source:RefSeq mRNA;Acc:NM_001319880]
ENSCDRG00005018519	PRL	prolactin [Source:NCBI gene;Acc:105089122]
ENSCDRG00005002127	WNT2	Wnt family member 2 [Source:NCBI gene;Acc:105085323]
ENSCDRG00005008228	BMP10	bone morphogenetic protein 10 [Source:NCBI gene;Acc:105088919]
ENSCDRG00005003447	EDN3	endothelin 3 [Source:NCBI gene;Acc:105095661]
ENSCDRG00005020536	Adcyap1	adenylate cyclase activating polypeptide 1 [Source:NCBI gene;Acc:105086153]
ENSCDRG00005003473	GCG	glucagon [Source:NCBI gene;Acc:105093688]
ENSCDRG00005000959	CXCL10	C-X-C motif chemokine ligand 10 [Source:NCBI gene;Acc:105091530]
ENSCDRG00005016051	FGA	fibrinogen alpha chain [Source:HGNC Symbol;Acc:HGNC:3661]
ENSCDRG00005008262	IL27	interleukin 27 [Source:NCBI gene;Acc:105102800]
ENSCDRG00005000841	IL15	interleukin 15 [Source:NCBI gene;Acc:105087917]
ENSCDRG00005007146	GUCA1B	guanylate cyclase activator 1B [Source:NCBI gene;Acc:105086761]
ENSCDRG00005000030	CXCL5	C-X-C motif chemokine ligand 5 [Source:HGNC Symbol;Acc:HGNC:10642]
ENSCDRG00005006980	IL6	interleukin 6 [Source:HGNC Symbol;Acc:HGNC:6018]
ENSCDRG00005011413	IL37	interleukin 37 [Source:NCBI gene;Acc:105093752]
ENSCDRG00005017910	KREMEN2	kringle containing transmembrane protein 2 [Source:HGNC Symbol;Acc:HGNC:18797]
ENSCDRG00005020205	LTB	lymphotoxin beta [Source:NCBI gene;Acc:105087472]
ENSCDRG00005000328	BTC	betacellulin [Source:NCBI gene;Acc:105091417]
ENSCDRG00005019987	CCL21	C-C motif chemokine ligand 21 [Source:HGNC Symbol;Acc:HGNC:10620]
ENSCDRG00005002099	CXCL13	C-X-C motif chemokine ligand 13 [Source:HGNC Symbol;Acc:HGNC:10639]
ENSCDRG00005003744	IL13	interleukin 13 [Source:HGNC Symbol;Acc:HGNC:5973]
ENSCDRG00005007459	WNT1	Wnt family member 1 [Source:NCBI gene;Acc:105103785]
ENSCDRG00005005249	EFNA4	ephrin A4 [Source:HGNC Symbol;Acc:HGNC:3224]
ENSCDRG00005014878	LIF	LIF interleukin 6 family cytokine [Source:HGNC Symbol;Acc:HGNC:6596]
ENSCDRG00005000940	CXCL9	C-X-C motif chemokine ligand 9 [Source:NCBI gene;Acc:105091520]
ENSCDRG00005015999	FGG	fibrinogen gamma chain [Source:NCBI gene;Acc:105089286]
ENSCDRG00005015667	EPO	erythropoietin [Source:HGNC Symbol;Acc:HGNC:3415]
ENSCDRG00005003219	LEAP2	liver enriched antimicrobial peptide 2 [Source:NCBI gene;Acc:105090198]
ENSCDRG00005013747	RSPO4	R-spondin 4 [Source:NCBI gene;Acc:105104309]
ENSCDRG00005020365	CCK	cholecystokinin [Source:HGNC Symbol;Acc:HGNC:1569]
ENSCDRG00005009599	TNFSF11	TNF superfamily member 11 [Source:HGNC Symbol;Acc:HGNC:11926]
ENSCDRG00005002184	IFNK	interferon kappa [Source:HGNC Symbol;Acc:HGNC:21714]
ENSCDRG00005004686	NPFF	neuropeptide FF-amide peptide precursor [Source:NCBI gene;Acc:105094556]
ENSCDRG00005004472	EBI3	Epstein-Barr virus induced 3 [Source:NCBI gene;Acc:105105305]
ENSCDRG00005019356	VIP	vasoactive intestinal peptide [Source:NCBI gene;Acc:105100928]
ENSCDRG00005003896	WNT16	Wnt family member 16 [Source:HGNC Symbol;Acc:HGNC:16267]
ENSCDRG00005007497	WNT10B	Wnt family member 10B [Source:HGNC Symbol;Acc:HGNC:12775]
ENSCDRG00005001556	WNT8A	Wnt family member 8A [Source:HGNC Symbol;Acc:HGNC:12788]
ENSCDRG00005004193	CGA	glycoprotein hormones, alpha polypeptide [Source:HGNC Symbol;Acc:HGNC:1885]
ENSCDRG00005009389	IL24	interleukin 24 [Source:HGNC Symbol;Acc:HGNC:11346]
ENSCDRG00005021149	RSPO2	R-spondin 2 [Source:HGNC Symbol;Acc:HGNC:28583]
ENSCDRG00005014232	GDF10	growth differentiation factor 10 [Source:HGNC Symbol;Acc:HGNC:4215]
ENSCDRG00005003887	WNT11	Wnt family member 11 [Source:HGNC Symbol;Acc:HGNC:12776]
ENSCDRG00005019835	BEST3	bestrophin 3 [Source:NCBI gene;Acc:105094383]
ENSCDRG00005014850	OSM	oncostatin M [Source:HGNC Symbol;Acc:HGNC:8506]
ENSCDRG00005019247	GRP	gastrin releasing peptide [Source:HGNC Symbol;Acc:HGNC:4605]
ENSCDRG00005020833	CRH	corticotropin releasing hormone [Source:HGNC Symbol;Acc:HGNC:2355]
ENSCDRG00005002894	IL2	interleukin 2 [Source:HGNC Symbol;Acc:HGNC:6001]
ENSCDRG00005019137	WNT8B	Wnt family member 8B [Source:NCBI gene;Acc:105084321]
ENSCDRG00005005609	PROK2	prokineticin 2 [Source:HGNC Symbol;Acc:HGNC:18455]
ENSCDRG00005007532	CTSG	cathepsin G [Source:NCBI gene;Acc:105106639]
ENSCDRG00005010354	UTS2	urotensin 2 [Source:HGNC Symbol;Acc:HGNC:12636]
ENSCDRG00005003085	NTF4	neurotrophin 4 [Source:NCBI gene;Acc:105102886]
ENSCDRG00005006578	KNG1	kininogen 1 [Source:NCBI gene;Acc:105085847]
ENSCDRG00005022426	FGF23	fibroblast growth factor 23 [Source:HGNC Symbol;Acc:HGNC:3680]
ENSCDRG00005010878	Tac4	tachykinin precursor 4 [Source:NCBI gene;Acc:105104830]
ENSCDRG00005018730	CCL2	C-C motif chemokine ligand 2 [Source:NCBI gene;Acc:105088228]
ENSCDRG00005015453	EDN2	endothelin 2 [Source:NCBI gene;Acc:105105487]
ENSCDRG00005020001	CCL19	C-C motif chemokine ligand 19 [Source:NCBI gene;Acc:105085602]
ENSCDRG00005006853	NPPC	natriuretic peptide C [Source:HGNC Symbol;Acc:HGNC:7941]
ENSCDRG00005007763	BMP2	bone morphogenetic protein 2 [Source:HGNC Symbol;Acc:HGNC:1069]
ENSCDRG00005010575	IL12B	interleukin 12B [Source:NCBI gene;Acc:105099900]
ENSCDRG00005005841	LEP	leptin [Source:HGNC Symbol;Acc:HGNC:6553]
ENSCDRG00005003718	NGF	nerve growth factor [Source:NCBI gene;Acc:105089623]
ENSCDRG00005007365	ADM	adrenomedullin [Source:NCBI gene;Acc:105086615]
ENSCDRG00005010767	CD40LG	CD40 ligand [Source:NCBI gene;Acc:105101647]
ENSCDRG00005012368	ASIP	agouti signaling protein [Source:HGNC Symbol;Acc:HGNC:745]
ENSCDRG00005003716	IL4	Camelus dromedarius interleukin 4 (IL4), mRNA. [Source:RefSeq mRNA;Acc:NM_001303554]
ENSCDRG00005009641	RSPO1	R-spondin 1 [Source:NCBI gene;Acc:105086930]
ENSCDRG00005013296	CCL25	C-C motif chemokine ligand 25 [Source:NCBI gene;Acc:105087578]
ENSCDRG00005007099	CCL24	C-C motif chemokine ligand 24 [Source:NCBI gene;Acc:105089658]
ENSCDRG00005005115	HCRT	hypocretin neuropeptide precursor [Source:HGNC Symbol;Acc:HGNC:4847]
ENSCDRG00005009619	IL19	interleukin 19 [Source:NCBI gene;Acc:105098662]
ENSCDRG00005013707	IL7	interleukin 7 [Source:NCBI gene;Acc:105088534]
ENSCDRG00005014217	GDF2	growth differentiation factor 2 [Source:HGNC Symbol;Acc:HGNC:4217]
ENSCDRG00005007742	MSTN	myostatin [Source:NCBI gene;Acc:105099167]
ENSCDRG00005003838	IL5	interleukin 5 [Source:NCBI gene;Acc:105090101]
ENSCDRG00005002864	IL21	interleukin 21 [Source:NCBI gene;Acc:105093665]
ENSCDRG00005000775	CNTF	ciliary neurotrophic factor [Source:NCBI gene;Acc:105094923]
ENSCDRG00005011923	CLCF1	cardiotrophin like cytokine factor 1 [Source:HGNC Symbol;Acc:HGNC:17412]
ENSCDRG00005018789	GHRH	growth hormone releasing hormone [Source:NCBI gene;Acc:105084993]
ENSCDRG00005021808	WNT3	Wnt family member 3 [Source:NCBI gene;Acc:105090437]
ENSCDRG00005021034	GH1	Somatotropin [Source:UniProtKB/Swiss-Prot;Acc:Q7YRR6]
ENSCDRG00005022428	FGF6	fibroblast growth factor 6 [Source:NCBI gene;Acc:105091325]
ENSCDRG00005013571	NPW	neuropeptide W [Source:HGNC Symbol;Acc:HGNC:30509]
ENSCDRG00005009335	DKK1	dickkopf WNT signaling pathway inhibitor 1 [Source:NCBI gene;Acc:105085258]
ENSCDRG00005006189	INSL5	insulin like 5 [Source:NCBI gene;Acc:105096619]
ENSCDRG00005013390	TNFSF4	TNF superfamily member 4 [Source:HGNC Symbol;Acc:HGNC:11934]
ENSCDRG00005003240	GDF9	growth differentiation factor 9 [Source:NCBI gene;Acc:105090181]
ENSCDRG00005014771	CCL28	C-C motif chemokine ligand 28 [Source:HGNC Symbol;Acc:HGNC:17700]
ENSCDRG00005000692	NPVF	neuropeptide VF precursor [Source:NCBI gene;Acc:105095082]
ENSCDRG00005000983	CXCL11	C-X-C motif chemokine ligand 11 [Source:NCBI gene;Acc:105091539]
ENSCDRG00005000181	EPGN	epithelial mitogen [Source:HGNC Symbol;Acc:HGNC:17470]
ENSCDRG00005009495	IL20	interleukin 20 [Source:NCBI gene;Acc:105098661]
ENSCDRG00005000033	PPBP	pro-platelet basic protein [Source:HGNC Symbol;Acc:HGNC:9240]
ENSCDRG00005015592	GUCA2A	guanylate cyclase activator 2A [Source:NCBI gene;Acc:105105489]
ENSCDRG00005013967	IL22	interleukin 22 [Source:NCBI gene;Acc:105101110]
ENSCDRG00005002981	IL12A	interleukin 12A [Source:HGNC Symbol;Acc:HGNC:5969]
ENSCDRG00005012929	VEGFD	vascular endothelial growth factor D [Source:HGNC Symbol;Acc:HGNC:3708]
ENSCDRG00005010750	IL17A	interleukin 17A [Source:NCBI gene;Acc:105099542]
ENSCDRG00005017121	UCN3	urocortin 3 [Source:NCBI gene;Acc:105091363]
ENSCDRG00005002949	Tac1	tachykinin precursor 1 [Source:NCBI gene;Acc:105088715]
ENSCDRG00005001974	NMU	neuromedin U [Source:HGNC Symbol;Acc:HGNC:7859]
ENSCDRG00005021354	GDF3	growth differentiation factor 3 [Source:NCBI gene;Acc:105098174]
ENSCDRG00005012282	PTHLH	parathyroid hormone like hormone [Source:NCBI gene;Acc:105103937]
ENSCDRG00005009710	IL10	interleukin 10 [Source:NCBI gene;Acc:105098609]
ENSCDRG00005006021	CSF3	colony stimulating factor 3 [Source:HGNC Symbol;Acc:HGNC:2438]
ENSCDRG00005020058	BMP15	bone morphogenetic protein 15 [Source:NCBI gene;Acc:105104375]
ENSCDRG00005010289	PMCH	pro-melanin concentrating hormone [Source:NCBI gene;Acc:105097467]
ENSCDRG00005016381	RLN3	relaxin 3 [Source:NCBI gene;Acc:105100772]
ENSCDRG00005017350	FGF8	fibroblast growth factor 8 [Source:NCBI gene;Acc:105084385]
ENSCDRG00005021463	FGF4	fibroblast growth factor 4 [Source:HGNC Symbol;Acc:HGNC:3682]
ENSCDRG00005014580	TNFSF15	TNF superfamily member 15 [Source:HGNC Symbol;Acc:HGNC:11931]
ENSCDRG00005017750	PTH	parathyroid hormone [Source:HGNC Symbol;Acc:HGNC:9606]
ENSCDRG00005002202	IL9	interleukin 9 [Source:NCBI gene;Acc:105090427]
ENSCDRG00005006820	BDNF	brain derived neurotrophic factor [Source:HGNC Symbol;Acc:HGNC:1033]
ENSCDRG00005020139	FSHB	follicle stimulating hormone subunit beta [Source:NCBI gene;Acc:105106548]
ENSCDRG00005002376	FGF5	fibroblast growth factor 5 [Source:HGNC Symbol;Acc:HGNC:3683]
ENSCDRG00005013256	FASLG	Fas ligand [Source:NCBI gene;Acc:105092770]
ENSCDRG00005015564	GUCA2B	guanylate cyclase activator 2B [Source:HGNC Symbol;Acc:HGNC:4683]
ENSCDRG00005007629	IL11	interleukin 11 [Source:NCBI gene;Acc:105098782]
ENSCDRG00005011890	IL36G	interleukin 36 gamma [Source:HGNC Symbol;Acc:HGNC:15741]
ENSCDRG00005006847	PTH2	parathyroid hormone 2 [Source:HGNC Symbol;Acc:HGNC:30828]
ENSCDRG00005004297	NPS	neuropeptide S [Source:HGNC Symbol;Acc:HGNC:33940]
ENSCDRG00005008307	SCT	secretin [Source:HGNC Symbol;Acc:HGNC:10607]
ENSCDRG00005021224	GDF6	growth differentiation factor 6 [Source:HGNC Symbol;Acc:HGNC:4221]
ENSCDRG00005015901	CORT	cortistatin [Source:HGNC Symbol;Acc:HGNC:2257]
ENSCDRG00005006831	GUCA1A	guanylate cyclase activator 1A [Source:NCBI gene;Acc:105086760]
ENSCDRG00005013591	PYY	peptide YY [Source:NCBI gene;Acc:105101046]
ENSCDRG00005008013	UCN	urocortin [Source:HGNC Symbol;Acc:HGNC:12516]
ENSCDRG00005001446	Prok1	prokineticin 1 [Source:NCBI gene;Acc:105085667]
ENSCDRG00005000291	EREG	epiregulin [Source:HGNC Symbol;Acc:HGNC:3443]
ENSCDRG00005007077	CCL26	C-C motif chemokine ligand 26 [Source:HGNC Symbol;Acc:HGNC:10625]
ENSCDRG00005003452	MLN	motilin [Source:HGNC Symbol;Acc:HGNC:7141]
ENSCDRG00005018248	GDNF	glial cell derived neurotrophic factor [Source:NCBI gene;Acc:105086987]
ENSCDRG00005010775	IL17F	interleukin 17F [Source:HGNC Symbol;Acc:HGNC:16404]
ENSCDRG00005010895	IL25	interleukin 25 [Source:HGNC Symbol;Acc:HGNC:13765]
ENSCDRG00005011983	IL36A	interleukin 36 alpha [Source:HGNC Symbol;Acc:HGNC:15562]
ENSCDRG00005009117	NTF3	neurotrophin 3 [Source:HGNC Symbol;Acc:HGNC:8023]
ENSCDRG00005020018	CCL27	C-C motif chemokine ligand 27 [Source:HGNC Symbol;Acc:HGNC:10626]
ENSCDRG00005011267	OSTN	osteocrin [Source:NCBI gene;Acc:105101250]
ENSCDRG00005013273	UCN2	urocortin 2 [Source:NCBI gene;Acc:105087930]
ENSCDRG00005000185	CSF2	colony stimulating factor 2 [Source:NCBI gene;Acc:105090018]
ENSCDRG00005012099	IL36RN	interleukin 36 receptor antagonist [Source:HGNC Symbol;Acc:HGNC:15561]
ENSCDRG00005008050	APLN	apelin [Source:HGNC Symbol;Acc:HGNC:16665]
ENSCDRG00005007648	GAL	galanin and GMAP prepropeptide [Source:NCBI gene;Acc:105104401]
ENSCDRG00005003878	TSHB	thyroid stimulating hormone subunit beta [Source:HGNC Symbol;Acc:HGNC:12372]
ENSCDRG00005015261	GDF5	growth differentiation factor 5 [Source:NCBI gene;Acc:105085034]
ENSCDRG00005020593	IL17C	interleukin 17C [Source:HGNC Symbol;Acc:HGNC:5983]
ENSCDRG00005011760	AGRP	agouti related neuropeptide [Source:NCBI gene;Acc:105088443]
ENSCDRG00005004553	CCL20	C-C motif chemokine ligand 20 [Source:HGNC Symbol;Acc:HGNC:10619]
ENSCDRG00005004041	CCL17	C-C motif chemokine ligand 17 [Source:NCBI gene;Acc:105093819]
ENSCDRG00005011677	GAST	gastrin [Source:HGNC Symbol;Acc:HGNC:4164]
ENSCDRG00005020986	INS	insulin [Source:HGNC Symbol;Acc:HGNC:6081]
ENSCDRG00005015101	PRLH	prolactin releasing hormone [Source:NCBI gene;Acc:105102874]
ENSCDRG00005011361	Uts2b	urotensin 2B [Source:NCBI gene;Acc:105101251]
ENSCDRG00005021964	NRTN	neurturin [Source:HGNC Symbol;Acc:HGNC:8007]

## Sheet: c
Classification of camel SON basal genes - catalytic receptors
human_ortholog_name	HGNC name	Type	Family name	camel_ensembl_ids	camel_external_gene_names	camel_descriptions
ITGAL	integrin subunit alpha L	catalytic_receptor	Integrins	ENSCDRG00005008958	ITGAL	integrin subunit alpha L [Source:NCBI gene;Acc:105102736]
ITGA3	integrin subunit alpha 3	catalytic_receptor	Integrins	ENSCDRG00005011434	ITGA3	integrin subunit alpha 3 [Source:NCBI gene;Acc:105104827]
ITGA2B	integrin subunit alpha 2b	catalytic_receptor	Integrins	ENSCDRG00005003803	ITGA2B	Camelus dromedarius integrin subunit alpha 2b (ITGA2B), mRNA. [Source:RefSeq mRNA;Acc:NM_001303547]
IL20RA	interleukin 20 receptor subunit alpha	catalytic_receptor	IL-10 receptor family	ENSCDRG00005014767	IL20RA	interleukin 20 receptor subunit alpha [Source:HGNC Symbol;Acc:HGNC:6003]
NLRP2	NLR family pyrin domain containing 2	catalytic_receptor	NOD-like receptor family	ENSCDRG00005005858	ENSCDRG00005005858	nan
FAS	Fas cell surface death receptor	catalytic_receptor	Tumour necrosis factor (TNF) receptor family	ENSCDRG00005006938	FAS	Fas cell surface death receptor [Source:NCBI gene;Acc:105102832]
INSRR	insulin receptor related receptor	catalytic_receptor	Type II RTKs: Insulin receptor family	ENSCDRG00005015604	INSRR	insulin receptor related receptor [Source:HGNC Symbol;Acc:HGNC:6093]
IFNGR1	interferon gamma receptor 1	catalytic_receptor	Interferon receptor family	ENSCDRG00005014662	IFNGR1	interferon gamma receptor 1 [Source:NCBI gene;Acc:105092040]
TNFRSF1B	TNF receptor superfamily member 1B	catalytic_receptor	Tumour necrosis factor (TNF) receptor family	ENSCDRG00005018060	TNFRSF1B	TNF receptor superfamily member 1B [Source:HGNC Symbol;Acc:HGNC:11917]
MUSK	muscle associated receptor tyrosine kinase	catalytic_receptor	Type IX RTKs: MuSK	ENSCDRG00005007069	MUSK	muscle associated receptor tyrosine kinase [Source:HGNC Symbol;Acc:HGNC:7525]
FLT4	fms related receptor tyrosine kinase 4	catalytic_receptor	Type IV RTKs: VEGF (vascular endothelial growth factor) receptor family	ENSCDRG00005004434	FLT4	fms related tyrosine kinase 4 [Source:HGNC Symbol;Acc:HGNC:3767]
EPHA3	EPH receptor A3	catalytic_receptor	Type XIII RTKs: Ephrin receptor family	ENSCDRG00005003214	EPHA3	EPH receptor A3 [Source:NCBI gene;Acc:105087762]
ROS1	ROS proto-oncogene 1, receptor tyrosine kinase	catalytic_receptor	Type XVII RTKs: ROS receptors	ENSCDRG00005002608	ROS1	ROS proto-oncogene 1, receptor tyrosine kinase [Source:HGNC Symbol;Acc:HGNC:10261]
TNFRSF9	TNF receptor superfamily member 9	catalytic_receptor	Tumour necrosis factor (TNF) receptor family	ENSCDRG00005010519	TNFRSF9	TNF receptor superfamily member 9 [Source:NCBI gene;Acc:105106985]
PTPRN	protein tyrosine phosphatase receptor type N	catalytic_receptor	Receptor tyrosine phosphatase (RTP) family	ENSCDRG00005000951	PTPRN	protein tyrosine phosphatase receptor type N [Source:NCBI gene;Acc:105096111]
RELT	RELT TNF receptor	catalytic_receptor	Tumour necrosis factor (TNF) receptor family	ENSCDRG00005001998	RELT	RELT TNF receptor [Source:HGNC Symbol;Acc:HGNC:13764]
IL17RB	interleukin 17 receptor B	catalytic_receptor	IL-17 receptor family	ENSCDRG00005014997	IL17RB	interleukin 17 receptor B [Source:HGNC Symbol;Acc:HGNC:18015]
STYK1	serine/threonine/tyrosine kinase 1	catalytic_receptor	Type XX RTKs: STYK1	ENSCDRG00005009147	STYK1	serine/threonine/tyrosine kinase 1 [Source:HGNC Symbol;Acc:HGNC:18889]
PTPRU	protein tyrosine phosphatase receptor type U	catalytic_receptor	Receptor tyrosine phosphatase (RTP) family	ENSCDRG00005015095	PTPRU	protein tyrosine phosphatase receptor type U [Source:NCBI gene;Acc:105090393]
GUCY1B1	guanylate cyclase 1 soluble subunit beta 1	catalytic_receptor	Nitric oxide (NO)-sensitive (soluble) guanylyl cyclase	ENSCDRG00005006271	GUCY1B1	guanylate cyclase 1 soluble subunit beta 1 [Source:NCBI gene;Acc:105101179]
NGFR	nerve growth factor receptor	catalytic_receptor	Tumour necrosis factor (TNF) receptor family	ENSCDRG00005010099	NGFR	nerve growth factor receptor [Source:HGNC Symbol;Acc:HGNC:7809]
ERBB3	erb-b2 receptor tyrosine kinase 3	catalytic_receptor	Type I RTKs: ErbB (epidermal growth factor) receptor family	ENSCDRG00005005154	ERBB3	erb-b2 receptor tyrosine kinase 3 [Source:NCBI gene;Acc:105086379]
TIE1	tyrosine kinase with immunoglobulin like and EGF like domains 1	catalytic_receptor	Type XII RTKs: TIE family of angiopoietin receptors	ENSCDRG00005007344	TIE1	tyrosine kinase with immunoglobulin like and EGF like domains 1 [Source:NCBI gene;Acc:105090912]
FGFR2	fibroblast growth factor receptor 2	catalytic_receptor	Type V RTKs: FGF (fibroblast growth factor) receptor family	ENSCDRG00005014046	FGFR2	fibroblast growth factor receptor 2 [Source:NCBI gene;Acc:105104060]
TNFRSF1A	TNF receptor superfamily member 1A	catalytic_receptor	Tumour necrosis factor (TNF) receptor family	ENSCDRG00005010816	TNFRSF1A	TNF receptor superfamily member 1A [Source:HGNC Symbol;Acc:HGNC:11916]
TGFBR3	transforming growth factor beta receptor 3	catalytic_receptor	Type III receptor serine/threonine kinases	ENSCDRG00005002972	TGFBR3	transforming growth factor beta receptor 3 [Source:HGNC Symbol;Acc:HGNC:11774]
GUCY2C	guanylate cyclase 2C	catalytic_receptor	Transmembrane guanylyl cyclases	ENSCDRG00005012147	GUCY2C	guanylate cyclase 2C [Source:HGNC Symbol;Acc:HGNC:4688]
EPHA8	EPH receptor A8	catalytic_receptor	Type XIII RTKs: Ephrin receptor family	ENSCDRG00005014357	EPHA8	EPH receptor A8 [Source:NCBI gene;Acc:105088871]
IL4R	interleukin 4 receptor	catalytic_receptor	IL-2 receptor family	ENSCDRG00005005480	IL4R	interleukin 4 receptor [Source:NCBI gene;Acc:105098257]
FGFR1	fibroblast growth factor receptor 1	catalytic_receptor	Type V RTKs: FGF (fibroblast growth factor) receptor family	ENSCDRG00005013254	FGFR1	fibroblast growth factor receptor 1 [Source:HGNC Symbol;Acc:HGNC:3688]
ITGA8	integrin subunit alpha 8	catalytic_receptor	Integrins	ENSCDRG00005020385	ITGA8	integrin subunit alpha 8 [Source:HGNC Symbol;Acc:HGNC:6144]
PTPRH	protein tyrosine phosphatase receptor type H	catalytic_receptor	Receptor tyrosine phosphatase (RTP) family	ENSCDRG00005006566	ENSCDRG00005006566	nan
EPHA6	EPH receptor A6	catalytic_receptor	Type XIII RTKs: Ephrin receptor family	ENSCDRG00005002980	EPHA6	EPH receptor A6 [Source:HGNC Symbol;Acc:HGNC:19296]
PTPRC	protein tyrosine phosphatase receptor type C	catalytic_receptor	Receptor tyrosine phosphatase (RTP) family	ENSCDRG00005011706	PTPRC	protein tyrosine phosphatase receptor type C [Source:HGNC Symbol;Acc:HGNC:9666]
IL12RB2	interleukin 12 receptor subunit beta 2	catalytic_receptor	IL-12 receptor family	ENSCDRG00005006997	IL12RB2	interleukin 12 receptor subunit beta 2 [Source:HGNC Symbol;Acc:HGNC:5972]
ITGB5	integrin subunit beta 5	catalytic_receptor	Integrins	ENSCDRG00005020949	ITGB5	integrin subunit beta 5 [Source:NCBI gene;Acc:105090274]
ITGAE	integrin subunit alpha E	catalytic_receptor	Integrins	ENSCDRG00005014621	ITGAE	integrin subunit alpha E [Source:HGNC Symbol;Acc:HGNC:6147]
NLRC4	NLR family CARD domain containing 4	catalytic_receptor	NOD-like receptor family	ENSCDRG00005015298	NLRC4	NLR family CARD domain containing 4 [Source:HGNC Symbol;Acc:HGNC:16412]
IL5RA	interleukin 5 receptor subunit alpha	catalytic_receptor	IL-3 receptor family	ENSCDRG00005006219	IL5RA	interleukin 5 receptor subunit alpha [Source:NCBI gene;Acc:105093162]
ITGA6	integrin subunit alpha 6	catalytic_receptor	Integrins	ENSCDRG00005000778	ITGA6	integrin subunit alpha 6 [Source:HGNC Symbol;Acc:HGNC:6142]
NLRP1	NLR family pyrin domain containing 1	catalytic_receptor	NOD-like receptor family	ENSCDRG00005012391	NLRP1	NLR family pyrin domain containing 1 [Source:HGNC Symbol;Acc:HGNC:14374]
TYRO3	TYRO3 protein tyrosine kinase	catalytic_receptor	Type XI RTKs: TAM (TYRO3-, AXL- and MER-TK) receptor family	ENSCDRG00005019954	TYRO3	TYRO3 protein tyrosine kinase [Source:NCBI gene;Acc:105096852]
IL12RB1	interleukin 12 receptor subunit beta 1	catalytic_receptor	IL-12 receptor family	ENSCDRG00005012582	IL12RB1	interleukin 12 receptor subunit beta 1 [Source:HGNC Symbol;Acc:HGNC:5971]
CSF2RB	colony stimulating factor 2 receptor subunit beta	catalytic_receptor	IL-3 receptor family	ENSCDRG00005006650	ENSCDRG00005006650	nan
IL2RB	interleukin 2 receptor subunit beta	catalytic_receptor	IL-2 receptor family	ENSCDRG00005007983	IL2RB	interleukin 2 receptor subunit beta [Source:HGNC Symbol;Acc:HGNC:6009]
CD40	CD40 molecule	catalytic_receptor	Immune checkpoint catalytic receptors	ENSCDRG00005019713	CD40	CD40 molecule [Source:NCBI gene;Acc:105087849]
GUCY2F	guanylate cyclase 2F, retinal	catalytic_receptor	Transmembrane guanylyl cyclases	ENSCDRG00005016402	GUCY2F	guanylate cyclase 2F, retinal [Source:NCBI gene;Acc:105093187]
TLR8	toll like receptor 8	catalytic_receptor	Toll-like receptor family	ENSCDRG00005010375	TLR8	toll like receptor 8 [Source:HGNC Symbol;Acc:HGNC:15632]
FLT1	fms related receptor tyrosine kinase 1	catalytic_receptor	Type IV RTKs: VEGF (vascular endothelial growth factor) receptor family	ENSCDRG00005003978	FLT1	fms related tyrosine kinase 1 [Source:HGNC Symbol;Acc:HGNC:3763]
IL21R	interleukin 21 receptor	catalytic_receptor	IL-2 receptor family	ENSCDRG00005005522	IL21R	interleukin 21 receptor [Source:HGNC Symbol;Acc:HGNC:6006]
TNFRSF10A	TNF receptor superfamily member 10a	catalytic_receptor	Tumour necrosis factor (TNF) receptor family	ENSCDRG00005015821	ENSCDRG00005015821	nan
IL27RA	interleukin 27 receptor subunit alpha	catalytic_receptor	IL-6 receptor family	ENSCDRG00005016180	IL27RA	interleukin 27 receptor subunit alpha [Source:NCBI gene;Acc:105100790]
PTPRS	protein tyrosine phosphatase receptor type S	catalytic_receptor	Receptor tyrosine phosphatase (RTP) family	ENSCDRG00005021998	ENSCDRG00005021998	nan
ITGB8	integrin subunit beta 8	catalytic_receptor	Integrins	ENSCDRG00005006022	ITGB8	integrin subunit beta 8 [Source:NCBI gene;Acc:105092896]
MET	MET proto-oncogene, receptor tyrosine kinase	catalytic_receptor	Type X RTKs: HGF (hepatocyte growth factor) receptor family	ENSCDRG00005001975	MET	MET proto-oncogene, receptor tyrosine kinase [Source:HGNC Symbol;Acc:HGNC:7029]
NOD1	nucleotide binding oligomerization domain containing 1	catalytic_receptor	NOD-like receptor family	ENSCDRG00005002317	NOD1	nucleotide binding oligomerization domain containing 1 [Source:NCBI gene;Acc:105095844]
EPHB6	EPH receptor B6	catalytic_receptor	Type XIII RTKs: Ephrin receptor family	ENSCDRG00005006214	EPHB6	EPH receptor B6 [Source:HGNC Symbol;Acc:HGNC:3396]
PTPRZ1	protein tyrosine phosphatase receptor type Z1	catalytic_receptor	Receptor tyrosine phosphatase (RTP) family	ENSCDRG00005004019	PTPRZ1	protein tyrosine phosphatase receptor type Z1 [Source:HGNC Symbol;Acc:HGNC:9685]
TGFBR1	transforming growth factor beta receptor 1	catalytic_receptor	Type I receptor serine/threonine kinases	ENSCDRG00005015383	TGFBR1	transforming growth factor beta receptor 1 [Source:HGNC Symbol;Acc:HGNC:11772]
DDX58	DExD/H-box helicase 58	catalytic_receptor	RIG-I-like receptor family	ENSCDRG00005006587	DDX58	DExD/H-box helicase 58 [Source:NCBI gene;Acc:105085563]
BMPR1A	bone morphogenetic protein receptor type 1A	catalytic_receptor	Type I receptor serine/threonine kinases	ENSCDRG00005012764	BMPR1A	bone morphogenetic protein receptor type 1A [Source:NCBI gene;Acc:105100358]
DHX58	DExH-box helicase 58	catalytic_receptor	RIG-I-like receptor family	ENSCDRG00005004345	DHX58	DExH-box helicase 58 [Source:NCBI gene;Acc:105090451]
IL10RA	interleukin 10 receptor subunit alpha	catalytic_receptor	IL-10 receptor family	ENSCDRG00005019163	IL10RA	interleukin 10 receptor subunit alpha [Source:NCBI gene;Acc:105090182]
LTBR	lymphotoxin beta receptor	catalytic_receptor	Tumour necrosis factor (TNF) receptor family	ENSCDRG00005011011	ENSCDRG00005011011	nan
PTK7	protein tyrosine kinase 7 (inactive)	catalytic_receptor	Type VI RTKs: PTK7/CCK4	ENSCDRG00005010109	ENSCDRG00005010109	protein tyrosine kinase 7 (inactive) [Source:HGNC Symbol;Acc:HGNC:9618]
GHR	growth hormone receptor	catalytic_receptor	Prolactin receptor family	ENSCDRG00005015314	GHR	growth hormone receptor [Source:HGNC Symbol;Acc:HGNC:4263]
NPR3	natriuretic peptide receptor 3	catalytic_receptor	Transmembrane guanylyl cyclases	ENSCDRG00005002141	NPR3	natriuretic peptide receptor 3 [Source:HGNC Symbol;Acc:HGNC:7945]
PRLR	prolactin receptor	catalytic_receptor	Prolactin receptor family	ENSCDRG00005001501	PRLR	prolactin receptor [Source:HGNC Symbol;Acc:HGNC:9446]
LIFR	LIF receptor subunit alpha	catalytic_receptor	IL-6 receptor family	ENSCDRG00005017655	LIFR	LIF receptor subunit alpha [Source:NCBI gene;Acc:105106812]
PDGFRB	platelet derived growth factor receptor beta	catalytic_receptor	Type III RTKs: PDGFR, CSFR, Kit, FLT3 receptor family	ENSCDRG00005002306	PDGFRB	platelet derived growth factor receptor beta [Source:NCBI gene;Acc:105098486]
ACVR2B	activin A receptor type 2B	catalytic_receptor	Type II receptor serine/threonine kinases	ENSCDRG00005018161	ACVR2B	activin A receptor type 2B [Source:HGNC Symbol;Acc:HGNC:174]
ACVR1	activin A receptor type 1	catalytic_receptor	Type I receptor serine/threonine kinases	ENSCDRG00005001459	ACVR1	activin A receptor type 1 [Source:NCBI gene;Acc:105093706]
ITGB6	integrin subunit beta 6	catalytic_receptor	Integrins	ENSCDRG00005002560	ITGB6	integrin subunit beta 6 [Source:NCBI gene;Acc:105093695]
ITGA4	integrin subunit alpha 4	catalytic_receptor	Integrins	ENSCDRG00005005689	ITGA4	integrin subunit alpha 4 [Source:HGNC Symbol;Acc:HGNC:6140]
IFIH1	interferon induced with helicase C domain 1	catalytic_receptor	RIG-I-like receptor family	ENSCDRG00005003897	IFIH1	interferon induced with helicase C domain 1 [Source:NCBI gene;Acc:105093686]
IL1R2	interleukin 1 receptor type 2	catalytic_receptor	Immunoglobulin-like family of IL-1 receptors	ENSCDRG00005004827	IL1R2	interleukin 1 receptor type 2 [Source:NCBI gene;Acc:105099111]
IL1R1	interleukin 1 receptor type 1	catalytic_receptor	Immunoglobulin-like family of IL-1 receptors	ENSCDRG00005004754	IL1R1	interleukin 1 receptor type 1 [Source:HGNC Symbol;Acc:HGNC:5993]
IL1RL2	interleukin 1 receptor like 2	catalytic_receptor	Immunoglobulin-like family of IL-1 receptors	ENSCDRG00005004695	IL1RL2	interleukin 1 receptor like 2 [Source:HGNC Symbol;Acc:HGNC:5999]
IL1RL1	interleukin 1 receptor like 1	catalytic_receptor	Immunoglobulin-like family of IL-1 receptors	ENSCDRG00005004642	IL1RL1	interleukin 1 receptor like 1 [Source:NCBI gene;Acc:105099107]
IL18R1	interleukin 18 receptor 1	catalytic_receptor	Immunoglobulin-like family of IL-1 receptors	ENSCDRG00005004590	ENSCDRG00005004590	interleukin 18 receptor 1 [Source:HGNC Symbol;Acc:HGNC:5988]
EPHA4	EPH receptor A4	catalytic_receptor	Type XIII RTKs: Ephrin receptor family	ENSCDRG00005001845	EPHA4	EPH receptor A4 [Source:NCBI gene;Acc:105096126]
LEPR	leptin receptor	catalytic_receptor	IL-6 receptor family	ENSCDRG00005005388	LEPR	leptin receptor [Source:NCBI gene;Acc:105107130]
MPL	MPL proto-oncogene, thrombopoietin receptor	catalytic_receptor	Prolactin receptor family	ENSCDRG00005007475	MPL	MPL proto-oncogene, thrombopoietin receptor [Source:NCBI gene;Acc:105090910]
CSF3R	colony stimulating factor 3 receptor	catalytic_receptor	Prolactin receptor family	ENSCDRG00005008687	CSF3R	colony stimulating factor 3 receptor [Source:HGNC Symbol;Acc:HGNC:2439]
TEK	TEK receptor tyrosine kinase	catalytic_receptor	Type XII RTKs: TIE family of angiopoietin receptors	ENSCDRG00005001992	TEK	TEK receptor tyrosine kinase [Source:HGNC Symbol;Acc:HGNC:11724]
TNFRSF8	TNF receptor superfamily member 8	catalytic_receptor	Tumour necrosis factor (TNF) receptor family	ENSCDRG00005017963	TNFRSF8	TNF receptor superfamily member 8 [Source:HGNC Symbol;Acc:HGNC:11923]
ACVR2A	activin A receptor type 2A	catalytic_receptor	Type II receptor serine/threonine kinases	ENSCDRG00005021318	ACVR2A	activin A receptor type 2A [Source:NCBI gene;Acc:105084601]
FLT3	fms related receptor tyrosine kinase 3	catalytic_receptor	Type III RTKs: PDGFR, CSFR, Kit, FLT3 receptor family	ENSCDRG00005003607	FLT3	fms related tyrosine kinase 3 [Source:NCBI gene;Acc:105086582]
CNTFR	ciliary neurotrophic factor receptor	catalytic_receptor	IL-6 receptor family	ENSCDRG00005020238	CNTFR	ciliary neurotrophic factor receptor [Source:HGNC Symbol;Acc:HGNC:2170]
IL13RA2	interleukin 13 receptor subunit alpha 2	catalytic_receptor	IL-2 receptor family	ENSCDRG00005008060	IL13RA2	interleukin 13 receptor subunit alpha 2 [Source:NCBI gene;Acc:105105362]
ACVR1C	activin A receptor type 1C	catalytic_receptor	Type I receptor serine/threonine kinases	ENSCDRG00005001439	ACVR1C	activin A receptor type 1C [Source:NCBI gene;Acc:105093708]
IL9R	interleukin 9 receptor	catalytic_receptor	IL-2 receptor family	ENSCDRG00005007313	IL9R	interleukin 9 receptor [Source:HGNC Symbol;Acc:HGNC:6030]
GFRA4	GDNF family receptor alpha 4	catalytic_receptor	GDNF receptor family	ENSCDRG00005011570	GFRA4	GDNF family receptor alpha 4 [Source:HGNC Symbol;Acc:HGNC:13821]
PTPRB	protein tyrosine phosphatase receptor type B	catalytic_receptor	Receptor tyrosine phosphatase (RTP) family	ENSCDRG00005018779	PTPRB	protein tyrosine phosphatase receptor type B [Source:HGNC Symbol;Acc:HGNC:9665]
TNFRSF19	TNF receptor superfamily member 19	catalytic_receptor	Tumour necrosis factor (TNF) receptor family	ENSCDRG00005017517	TNFRSF19	TNF receptor superfamily member 19 [Source:HGNC Symbol;Acc:HGNC:11915]
KDR	kinase insert domain receptor	catalytic_receptor	Type IV RTKs: VEGF (vascular endothelial growth factor) receptor family	ENSCDRG00005002066	KDR	kinase insert domain receptor [Source:HGNC Symbol;Acc:HGNC:6307]
EDA2R	ectodysplasin A2 receptor	catalytic_receptor	Tumour necrosis factor (TNF) receptor family	ENSCDRG00005013728	EDA2R	ectodysplasin A2 receptor [Source:NCBI gene;Acc:105090654]
IL13RA1	interleukin 13 receptor subunit alpha 1	catalytic_receptor	IL-2 receptor family	ENSCDRG00005010522	IL13RA1	interleukin 13 receptor subunit alpha 1 [Source:NCBI gene;Acc:105093924]
PTPRE	protein tyrosine phosphatase receptor type E	catalytic_receptor	Receptor tyrosine phosphatase (RTP) family	ENSCDRG00005004037	PTPRE	protein tyrosine phosphatase receptor type E [Source:HGNC Symbol;Acc:HGNC:9669]
ITGB4	integrin subunit beta 4	catalytic_receptor	Integrins	ENSCDRG00005005589	ITGB4	integrin subunit beta 4 [Source:HGNC Symbol;Acc:HGNC:6158]
GUCY2D	guanylate cyclase 2D, retinal	catalytic_receptor	Transmembrane guanylyl cyclases	ENSCDRG00005012602	GUCY2D	guanylate cyclase 2D, retinal [Source:HGNC Symbol;Acc:HGNC:4689]
PTPRA	protein tyrosine phosphatase receptor type A	catalytic_receptor	Receptor tyrosine phosphatase (RTP) family	ENSCDRG00005009357	PTPRA	protein tyrosine phosphatase receptor type A [Source:NCBI gene;Acc:105096038]
EPHB2	EPH receptor B2	catalytic_receptor	Type XIII RTKs: Ephrin receptor family	ENSCDRG00005014531	EPHB2	EPH receptor B2 [Source:NCBI gene;Acc:105088876]
IL6ST	interleukin 6 signal transducer	catalytic_receptor	IL-6 receptor family	ENSCDRG00005006461	IL6ST	interleukin 6 signal transducer [Source:NCBI gene;Acc:105087138]
IL2RA	interleukin 2 receptor subunit alpha	catalytic_receptor	IL-2 receptor family	ENSCDRG00005015986	IL2RA	interleukin 2 receptor subunit alpha [Source:HGNC Symbol;Acc:HGNC:6008]
IL15RA	interleukin 15 receptor subunit alpha	catalytic_receptor	IL-2 receptor family	ENSCDRG00005016037	ENSCDRG00005016037	interleukin 15 receptor subunit alpha [Source:NCBI gene;Acc:105091356]
PDGFRA	platelet derived growth factor receptor alpha	catalytic_receptor	Type III RTKs: PDGFR, CSFR, Kit, FLT3 receptor family	ENSCDRG00005002143	PDGFRA	platelet derived growth factor receptor alpha [Source:NCBI gene;Acc:105103397]
EPHA7	EPH receptor A7	catalytic_receptor	Type XIII RTKs: Ephrin receptor family	ENSCDRG00005016323	EPHA7	EPH receptor A7 [Source:NCBI gene;Acc:105092264]
AMHR2	anti-Mullerian hormone receptor type 2	catalytic_receptor	Type II receptor serine/threonine kinases	ENSCDRG00005005034	AMHR2	anti-Mullerian hormone receptor type 2 [Source:HGNC Symbol;Acc:HGNC:465]
ITGA7	integrin subunit alpha 7	catalytic_receptor	Integrins	ENSCDRG00005009285	ENSCDRG00005009285	nan
ACVR1B	activin A receptor type 1B	catalytic_receptor	Type I receptor serine/threonine kinases	ENSCDRG00005012094	ACVR1B	activin A receptor type 1B [Source:HGNC Symbol;Acc:HGNC:172]
EDAR	ectodysplasin A receptor	catalytic_receptor	Tumour necrosis factor (TNF) receptor family	ENSCDRG00005017679	EDAR	ectodysplasin A receptor [Source:HGNC Symbol;Acc:HGNC:2895]
TLR4	toll like receptor 4	catalytic_receptor	Toll-like receptor family	ENSCDRG00005012955	TLR4	toll like receptor 4 [Source:HGNC Symbol;Acc:HGNC:11850]
IL11RA	interleukin 11 receptor subunit alpha	catalytic_receptor	IL-6 receptor family	ENSCDRG00005020048	ENSCDRG00005020048	interleukin 11 receptor subunit alpha [Source:NCBI gene;Acc:105085599]
ITGA11	integrin subunit alpha 11	catalytic_receptor	Integrins	ENSCDRG00005017386	ITGA11	integrin subunit alpha 11 [Source:HGNC Symbol;Acc:HGNC:6136]
ITGAV	integrin subunit alpha V	catalytic_receptor	Integrins	ENSCDRG00005008520	ITGAV	integrin subunit alpha V [Source:HGNC Symbol;Acc:HGNC:6150]
BMPR1B	bone morphogenetic protein receptor type 1B	catalytic_receptor	Type I receptor serine/threonine kinases	ENSCDRG00005008805	BMPR1B	bone morphogenetic protein receptor type 1B [Source:NCBI gene;Acc:105089530]
CD27	CD27 molecule	catalytic_receptor	Tumour necrosis factor (TNF) receptor family	ENSCDRG00005011099	ENSCDRG00005011099	CD27 molecule [Source:NCBI gene;Acc:105098222]
PTPRQ	protein tyrosine phosphatase receptor type Q	catalytic_receptor	Receptor tyrosine phosphatase (RTP) family	ENSCDRG00005009356	PTPRQ	protein tyrosine phosphatase receptor type Q [Source:HGNC Symbol;Acc:HGNC:9679]
ACVRL1	activin A receptor like type 1	catalytic_receptor	Type I receptor serine/threonine kinases	ENSCDRG00005012249	ACVRL1	activin A receptor like type 1 [Source:HGNC Symbol;Acc:HGNC:175]
ITGB7	integrin subunit beta 7	catalytic_receptor	Integrins	ENSCDRG00005005597	ITGB7	integrin subunit beta 7 [Source:HGNC Symbol;Acc:HGNC:6162]
IGF1R	insulin like growth factor 1 receptor	catalytic_receptor	Type II RTKs: Insulin receptor family	ENSCDRG00005019740	IGF1R	insulin like growth factor 1 receptor [Source:HGNC Symbol;Acc:HGNC:5465]
NTRK3	neurotrophic receptor tyrosine kinase 3	catalytic_receptor	Type VII RTKs: Neurotrophin receptor/Trk family	ENSCDRG00005020380	NTRK3	neurotrophic receptor tyrosine kinase 3 [Source:HGNC Symbol;Acc:HGNC:8033]
NLRC5	NLR family CARD domain containing 5	catalytic_receptor	NOD-like receptor family	ENSCDRG00005003296	NLRC5	NLR family CARD domain containing 5 [Source:NCBI gene;Acc:105102672]
TNFRSF11A	TNF receptor superfamily member 11a	catalytic_receptor	Tumour necrosis factor (TNF) receptor family	ENSCDRG00005017584	TNFRSF11A	TNF receptor superfamily member 11a [Source:HGNC Symbol;Acc:HGNC:11908]
ERBB2	erb-b2 receptor tyrosine kinase 2	catalytic_receptor	Type I RTKs: ErbB (epidermal growth factor) receptor family	ENSCDRG00005005002	ERBB2	erb-b2 receptor tyrosine kinase 2 [Source:HGNC Symbol;Acc:HGNC:3430]
IFNAR1	interferon alpha and beta receptor subunit 1	catalytic_receptor	Interferon receptor family	ENSCDRG00005002453	IFNAR1	interferon alpha and beta receptor subunit 1 [Source:HGNC Symbol;Acc:HGNC:5432]
NLRP12	NLR family pyrin domain containing 12	catalytic_receptor	NOD-like receptor family	ENSCDRG00005002104	NLRP12	NLR family pyrin domain containing 12 [Source:NCBI gene;Acc:105091262]
EPHA2	EPH receptor A2	catalytic_receptor	Type XIII RTKs: Ephrin receptor family	ENSCDRG00005003965	EPHA2	EPH receptor A2 [Source:HGNC Symbol;Acc:HGNC:3386]
IL22RA1	interleukin 22 receptor subunit alpha 1	catalytic_receptor	IL-10 receptor family	ENSCDRG00005003864	IL22RA1	interleukin 22 receptor subunit alpha 1 [Source:HGNC Symbol;Acc:HGNC:13700]
PTPRF	protein tyrosine phosphatase receptor type F	catalytic_receptor	Receptor tyrosine phosphatase (RTP) family	ENSCDRG00005008697	PTPRF	protein tyrosine phosphatase receptor type F [Source:NCBI gene;Acc:105090904]
ITGA10	integrin subunit alpha 10	catalytic_receptor	Integrins	ENSCDRG00005014118	ITGA10	peroxisomal biogenesis factor 11 beta [Source:NCBI gene;Acc:105105883]
ITGA9	integrin subunit alpha 9	catalytic_receptor	Integrins	ENSCDRG00005016528	ITGA9	integrin subunit alpha 9 [Source:NCBI gene;Acc:105090729]
PTPRG	protein tyrosine phosphatase receptor type G	catalytic_receptor	Receptor tyrosine phosphatase (RTP) family	ENSCDRG00005020404	PTPRG	protein tyrosine phosphatase receptor type G [Source:HGNC Symbol;Acc:HGNC:9671]
IL17RD	interleukin 17 receptor D	catalytic_receptor	IL-17 receptor family	ENSCDRG00005017374	IL17RD	interleukin 17 receptor D [Source:HGNC Symbol;Acc:HGNC:17616]
EPHA5	EPH receptor A5	catalytic_receptor	Type XIII RTKs: Ephrin receptor family	ENSCDRG00005016353	EPHA5	EPH receptor A5 [Source:HGNC Symbol;Acc:HGNC:3389]
OSMR	oncostatin M receptor	catalytic_receptor	IL-6 receptor family	ENSCDRG00005017567	OSMR	oncostatin M receptor [Source:NCBI gene;Acc:105106827]
GFRA3	GDNF family receptor alpha 3	catalytic_receptor	GDNF receptor family	ENSCDRG00005001308	GFRA3	GDNF family receptor alpha 3 [Source:NCBI gene;Acc:105091075]
TNFRSF21	TNF receptor superfamily member 21	catalytic_receptor	Tumour necrosis factor (TNF) receptor family	ENSCDRG00005018082	TNFRSF21	TNF receptor superfamily member 21 [Source:HGNC Symbol;Acc:HGNC:13469]
EGFR	epidermal growth factor receptor	catalytic_receptor	Type I RTKs: ErbB (epidermal growth factor) receptor family	ENSCDRG00005015677	EGFR	epidermal growth factor receptor [Source:HGNC Symbol;Acc:HGNC:3236]
EPHA1	EPH receptor A1	catalytic_receptor	Type XIII RTKs: Ephrin receptor family	ENSCDRG00005007411	EPHA1	EPH receptor A1 [Source:NCBI gene;Acc:105105519]
IL2RG	interleukin 2 receptor subunit gamma	catalytic_receptor	IL-2 receptor family	ENSCDRG00005016638	ENSCDRG00005016638	nan
NTRK2	neurotrophic receptor tyrosine kinase 2	catalytic_receptor	Type VII RTKs: Neurotrophin receptor/Trk family	ENSCDRG00005019324	NTRK2	neurotrophic receptor tyrosine kinase 2 [Source:HGNC Symbol;Acc:HGNC:8032]
PTPRJ	protein tyrosine phosphatase receptor type J	catalytic_receptor	Receptor tyrosine phosphatase (RTP) family	ENSCDRG00005001148	PTPRJ	protein tyrosine phosphatase receptor type J [Source:HGNC Symbol;Acc:HGNC:9673]
ITGB1	integrin subunit beta 1	catalytic_receptor	Integrins	ENSCDRG00005019390	ITGB1	integrin subunit beta 1 [Source:NCBI gene;Acc:105100650]
PTPRO	protein tyrosine phosphatase receptor type O	catalytic_receptor	Receptor tyrosine phosphatase (RTP) family	ENSCDRG00005014781	PTPRO	protein tyrosine phosphatase receptor type O [Source:HGNC Symbol;Acc:HGNC:9678]
GFRA1	GDNF family receptor alpha 1	catalytic_receptor	GDNF receptor family	ENSCDRG00005018886	GFRA1	GDNF family receptor alpha 1 [Source:NCBI gene;Acc:105095106]
GUCY1A2	guanylate cyclase 1 soluble subunit alpha 2	catalytic_receptor	Nitric oxide (NO)-sensitive (soluble) guanylyl cyclase	ENSCDRG00005020590	GUCY1A2	guanylate cyclase 1 soluble subunit alpha 2 [Source:HGNC Symbol;Acc:HGNC:4684]
PTPRK	protein tyrosine phosphatase receptor type K	catalytic_receptor	Receptor tyrosine phosphatase (RTP) family	ENSCDRG00005000789	PTPRK	protein tyrosine phosphatase receptor type K [Source:NCBI gene;Acc:105096329]
MERTK	MER proto-oncogene, tyrosine kinase	catalytic_receptor	Type XI RTKs: TAM (TYRO3-, AXL- and MER-TK) receptor family	ENSCDRG00005008922	MERTK	MER proto-oncogene, tyrosine kinase [Source:HGNC Symbol;Acc:HGNC:7027]
PTPRR	protein tyrosine phosphatase receptor type R	catalytic_receptor	Receptor tyrosine phosphatase (RTP) family	ENSCDRG00005018422	PTPRR	protein tyrosine phosphatase receptor type R [Source:HGNC Symbol;Acc:HGNC:9680]
PTPRD	protein tyrosine phosphatase receptor type D	catalytic_receptor	Receptor tyrosine phosphatase (RTP) family	ENSCDRG00005005639	PTPRD	protein tyrosine phosphatase receptor type D [Source:HGNC Symbol;Acc:HGNC:9668]
EPHB1	EPH receptor B1	catalytic_receptor	Type XIII RTKs: Ephrin receptor family	ENSCDRG00005013104	EPHB1	EPH receptor B1 [Source:HGNC Symbol;Acc:HGNC:3392]
ITGAD	integrin subunit alpha D	catalytic_receptor	Integrins	ENSCDRG00005014813	ENSCDRG00005014813	nan
KIT	KIT proto-oncogene, receptor tyrosine kinase	catalytic_receptor	Type III RTKs: PDGFR, CSFR, Kit, FLT3 receptor family	ENSCDRG00005002100	KIT	KIT proto-oncogene, receptor tyrosine kinase [Source:HGNC Symbol;Acc:HGNC:6342]
NLRP14	NLR family pyrin domain containing 14	catalytic_receptor	NOD-like receptor family	ENSCDRG00005013712	NLRP14	NLR family pyrin domain containing 14 [Source:HGNC Symbol;Acc:HGNC:22939]
IFNAR2	interferon alpha and beta receptor subunit 2	catalytic_receptor	Interferon receptor family	ENSCDRG00005002424	IFNAR2	interferon alpha and beta receptor subunit 2 [Source:NCBI gene;Acc:105089871]
IFNGR2	interferon gamma receptor 2	catalytic_receptor	Interferon receptor family	ENSCDRG00005002471	IFNGR2	interferon gamma receptor 2 [Source:HGNC Symbol;Acc:HGNC:5440]
NPR2	natriuretic peptide receptor 2	catalytic_receptor	Transmembrane guanylyl cyclases	ENSCDRG00005004561	NPR2	natriuretic peptide receptor 2 [Source:HGNC Symbol;Acc:HGNC:7944]
TNFRSF13C	TNF receptor superfamily member 13C	catalytic_receptor	Tumour necrosis factor (TNF) receptor family	ENSCDRG00005003774	TNFRSF13C	TNF receptor superfamily member 13C [Source:HGNC Symbol;Acc:HGNC:17755]
ITGB2	integrin subunit beta 2	catalytic_receptor	Integrins	ENSCDRG00005021886	ITGB2	integrin subunit beta 2 [Source:HGNC Symbol;Acc:HGNC:6155]
NLRX1	NLR family member X1	catalytic_receptor	NOD-like receptor family	ENSCDRG00005020813	NLRX1	NLR family member X1 [Source:NCBI gene;Acc:105090145]
IL6R	interleukin 6 receptor	catalytic_receptor	IL-6 receptor family	ENSCDRG00005019596	IL6R	interleukin 6 receptor [Source:NCBI gene;Acc:105089663]
FGFR4	fibroblast growth factor receptor 4	catalytic_receptor	Type V RTKs: FGF (fibroblast growth factor) receptor family	ENSCDRG00005010387	FGFR4	fibroblast growth factor receptor 4 [Source:NCBI gene;Acc:105099582]
ITGA5	integrin subunit alpha 5	catalytic_receptor	Integrins	ENSCDRG00005003372	ITGA5	integrin subunit alpha 5 [Source:NCBI gene;Acc:105101003]
IL23R	interleukin 23 receptor	catalytic_receptor	IL-12 receptor family	ENSCDRG00005006826	IL23R	interleukin 23 receptor [Source:NCBI gene;Acc:105096623]
NLRP3	NLR family pyrin domain containing 3	catalytic_receptor	NOD-like receptor family	ENSCDRG00005008859	NLRP3	NLR family pyrin domain containing 3 [Source:NCBI gene;Acc:105104203]
DDR2	discoidin domain receptor tyrosine kinase 2	catalytic_receptor	Type XVI RTKs: DDR (collagen receptor) family	ENSCDRG00005003991	DDR2	discoidin domain receptor tyrosine kinase 2 [Source:NCBI gene;Acc:105092700]
TGFBR2	transforming growth factor beta receptor 2	catalytic_receptor	Type II receptor serine/threonine kinases	ENSCDRG00005010511	TGFBR2	transforming growth factor beta receptor 2 [Source:HGNC Symbol;Acc:HGNC:11773]
IL17RE	interleukin 17 receptor E	catalytic_receptor	IL-17 receptor family	ENSCDRG00005011969	IL17RE	interleukin 17 receptor E [Source:HGNC Symbol;Acc:HGNC:18439]
IL17RC	interleukin 17 receptor C	catalytic_receptor	IL-17 receptor family	ENSCDRG00005012069	IL17RC	interleukin 17 receptor C [Source:NCBI gene;Acc:105093124]
RYK	receptor like tyrosine kinase	catalytic_receptor	Type XV RTKs: RYK	ENSCDRG00005012210	RYK	receptor like tyrosine kinase [Source:HGNC Symbol;Acc:HGNC:10481]
MST1R	macrophage stimulating 1 receptor	catalytic_receptor	Type X RTKs: HGF (hepatocyte growth factor) receptor family	ENSCDRG00005006950	MST1R	macrophage stimulating 1 receptor [Source:NCBI gene;Acc:105087596]
GUCY1A1	guanylate cyclase 1 soluble subunit alpha 1	catalytic_receptor	Nitric oxide (NO)-sensitive (soluble) guanylyl cyclase	ENSCDRG00005006240	GUCY1A1	guanylate cyclase 1 soluble subunit alpha 1 [Source:NCBI gene;Acc:105101181]
ITGA2	integrin subunit alpha 2	catalytic_receptor	Integrins	ENSCDRG00005011170	ITGA2	integrin subunit alpha 2 [Source:NCBI gene;Acc:105084263]
TLR3	toll like receptor 3	catalytic_receptor	Toll-like receptor family	ENSCDRG00005012086	TLR3	toll like receptor 3 [Source:NCBI gene;Acc:105102386]
IL22RA2	interleukin 22 receptor subunit alpha 2	catalytic_receptor	IL-10 receptor family	ENSCDRG00005014705	IL22RA2	interleukin 22 receptor subunit alpha 2 [Source:NCBI gene;Acc:105092085]
IL31RA	interleukin 31 receptor A	catalytic_receptor	IL-6 receptor family	ENSCDRG00005006643	IL31RA	interleukin 31 receptor A [Source:HGNC Symbol;Acc:HGNC:18969]
LMTK2	lemur tyrosine kinase 2	catalytic_receptor	Type XVIII RTKs: LMR family	ENSCDRG00005013925	LMTK2	lemur tyrosine kinase 2 [Source:HGNC Symbol;Acc:HGNC:17880]
TNFRSF11B	TNF receptor superfamily member 11b	catalytic_receptor	Tumour necrosis factor (TNF) receptor family	ENSCDRG00005021806	TNFRSF11B	TNF receptor superfamily member 11b [Source:HGNC Symbol;Acc:HGNC:11909]
RET	ret proto-oncogene	catalytic_receptor	Type XIV RTKs: RET	ENSCDRG00005007057	RET	ret proto-oncogene [Source:HGNC Symbol;Acc:HGNC:9967]
NOD2	nucleotide binding oligomerization domain containing 2	catalytic_receptor	NOD-like receptor family	ENSCDRG00005000930	NOD2	nucleotide binding oligomerization domain containing 2 [Source:NCBI gene;Acc:105097522]
AXL	AXL receptor tyrosine kinase	catalytic_receptor	Type XI RTKs: TAM (TYRO3-, AXL- and MER-TK) receptor family	ENSCDRG00005014877	AXL	AXL receptor tyrosine kinase [Source:NCBI gene;Acc:105093364]
NLRC3	NLR family CARD domain containing 3	catalytic_receptor	NOD-like receptor family	ENSCDRG00005007009	NLRC3	NLR family CARD domain containing 3 [Source:HGNC Symbol;Acc:HGNC:29889]
GFRA2	GDNF family receptor alpha 2	catalytic_receptor	GDNF receptor family	ENSCDRG00005007786	GFRA2	GDNF family receptor alpha 2 [Source:HGNC Symbol;Acc:HGNC:4244]
IL7R	interleukin 7 receptor	catalytic_receptor	IL-2 receptor family	ENSCDRG00005001012	IL7R	interleukin 7 receptor [Source:NCBI gene;Acc:105087002]
ROR2	receptor tyrosine kinase like orphan receptor 2	catalytic_receptor	Type VIII RTKs: ROR family	ENSCDRG00005017256	ROR2	receptor tyrosine kinase like orphan receptor 2 [Source:HGNC Symbol;Acc:HGNC:10257]
NPR1	natriuretic peptide receptor 1	catalytic_receptor	Transmembrane guanylyl cyclases	ENSCDRG00005016967	NPR1	natriuretic peptide receptor 1 [Source:HGNC Symbol;Acc:HGNC:7943]
ITGAM	integrin subunit alpha M	catalytic_receptor	Integrins	ENSCDRG00005014442	ITGAM	integrin subunit alpha M [Source:NCBI gene;Acc:105089721]
ALK	ALK receptor tyrosine kinase	catalytic_receptor	Type XIX RTKs: Leukocyte tyrosine kinase (LTK) receptor family	ENSCDRG00005013130	ALK	ALK receptor tyrosine kinase [Source:HGNC Symbol;Acc:HGNC:427]
INSR	insulin receptor	catalytic_receptor	Type II RTKs: Insulin receptor family	ENSCDRG00005016879	INSR	insulin receptor [Source:NCBI gene;Acc:105087555]
NLRP5	NLR family pyrin domain containing 5	catalytic_receptor	NOD-like receptor family	ENSCDRG00005010437	NLRP5	NLR family pyrin domain containing 5 [Source:HGNC Symbol;Acc:HGNC:21269]
PTPRM	protein tyrosine phosphatase receptor type M	catalytic_receptor	Receptor tyrosine phosphatase (RTP) family	ENSCDRG00005014275	PTPRM	protein tyrosine phosphatase receptor type M [Source:NCBI gene;Acc:105099388]
NLRP13	NLR family pyrin domain containing 13	catalytic_receptor	NOD-like receptor family	ENSCDRG00005010306	ENSCDRG00005010306	nan
TLR10	toll like receptor 10	catalytic_receptor	Toll-like receptor family	ENSCDRG00005010269	TLR10	toll like receptor 10 [Source:HGNC Symbol;Acc:HGNC:15634]
TLR1	toll like receptor 1	catalytic_receptor	Toll-like receptor family	ENSCDRG00005010240	TLR1	toll like receptor 1 [Source:HGNC Symbol;Acc:HGNC:11847]
TLR6	toll like receptor 6	catalytic_receptor	Toll-like receptor family	ENSCDRG00005010208	TLR6	toll like receptor 6 [Source:HGNC Symbol;Acc:HGNC:16711]
IL20RB	interleukin 20 receptor subunit beta	catalytic_receptor	IL-10 receptor family	ENSCDRG00005014994	IL20RB	interleukin 20 receptor subunit beta [Source:HGNC Symbol;Acc:HGNC:6004]
NLRP6	NLR family pyrin domain containing 6	catalytic_receptor	NOD-like receptor family	ENSCDRG00005003660	NLRP6	NLR family pyrin domain containing 6 [Source:HGNC Symbol;Acc:HGNC:22944]
IL17RA	interleukin 17 receptor A	catalytic_receptor	IL-17 receptor family	ENSCDRG00005021176	IL17RA	interleukin 17 receptor A [Source:HGNC Symbol;Acc:HGNC:5985]
ERBB4	erb-b2 receptor tyrosine kinase 4	catalytic_receptor	Type I RTKs: ErbB (epidermal growth factor) receptor family	ENSCDRG00005011281	ERBB4	erb-b2 receptor tyrosine kinase 4 [Source:NCBI gene;Acc:105099620]
CIITA	class II major histocompatibility complex transactivator	catalytic_receptor	NOD-like receptor family	ENSCDRG00005018981	CIITA	class II major histocompatibility complex transactivator [Source:HGNC Symbol;Acc:HGNC:7067]
AATK	apoptosis associated tyrosine kinase	catalytic_receptor	Type XVIII RTKs: LMR family	ENSCDRG00005012963	AATK	apoptosis associated tyrosine kinase [Source:HGNC Symbol;Acc:HGNC:21]
CSF1R	colony stimulating factor 1 receptor	catalytic_receptor	Type III RTKs: PDGFR, CSFR, Kit, FLT3 receptor family	ENSCDRG00005002338	CSF1R	colony stimulating factor 1 receptor [Source:NCBI gene;Acc:105098488]
EPHB3	EPH receptor B3	catalytic_receptor	Type XIII RTKs: Ephrin receptor family	ENSCDRG00005003581	EPHB3	EPH receptor B3 [Source:NCBI gene;Acc:105085869]
EPHA10	EPH receptor A10	catalytic_receptor	Type XIII RTKs: Ephrin receptor family	ENSCDRG00005009929	ENSCDRG00005009929	nan
SIGIRR	single Ig and TIR domain containing	catalytic_receptor	Immunoglobulin-like family of IL-1 receptors	ENSCDRG00005006812	SIGIRR	single Ig and TIR domain containing [Source:HGNC Symbol;Acc:HGNC:30575]
IL3RA	interleukin 3 receptor subunit alpha	catalytic_receptor	IL-3 receptor family	ENSCDRG00005017309	ENSCDRG00005017309	nan
IFNLR1	interferon lambda receptor 1	catalytic_receptor	IL-10 receptor family	ENSCDRG00005003900	ENSCDRG00005003900	nan
ROR1	receptor tyrosine kinase like orphan receptor 1	catalytic_receptor	Type VIII RTKs: ROR family	ENSCDRG00005003848	ROR1	receptor tyrosine kinase like orphan receptor 1 [Source:NCBI gene;Acc:105107134]
NLRP9	NLR family pyrin domain containing 9	catalytic_receptor	NOD-like receptor family	ENSCDRG00005010148	NLRP9	NLR family pyrin domain containing 9 [Source:HGNC Symbol;Acc:HGNC:22941]
TNFRSF4	TNF receptor superfamily member 4	catalytic_receptor	Tumour necrosis factor (TNF) receptor family	ENSCDRG00005005562	TNFRSF4	TNF receptor superfamily member 4 [Source:NCBI gene;Acc:105105585]
TNFRSF18	TNF receptor superfamily member 18	catalytic_receptor	Tumour necrosis factor (TNF) receptor family	ENSCDRG00005005545	ENSCDRG00005005545	nan
EPOR	erythropoietin receptor	catalytic_receptor	Prolactin receptor family	ENSCDRG00005012547	EPOR	erythropoietin receptor [Source:HGNC Symbol;Acc:HGNC:3416]
TLR5	toll like receptor 5	catalytic_receptor	Toll-like receptor family	ENSCDRG00005018968	TLR5	toll like receptor 5 [Source:NCBI gene;Acc:105099860]
GFRAL	GDNF family receptor alpha like	catalytic_receptor	GDNF receptor family	ENSCDRG00005014483	GFRAL	GDNF family receptor alpha like [Source:HGNC Symbol;Acc:HGNC:32789]
PTPRT	protein tyrosine phosphatase receptor type T	catalytic_receptor	Receptor tyrosine phosphatase (RTP) family	ENSCDRG00005010508	PTPRT	protein tyrosine phosphatase receptor type T [Source:HGNC Symbol;Acc:HGNC:9682]
EPHB4	EPH receptor B4	catalytic_receptor	Type XIII RTKs: Ephrin receptor family	ENSCDRG00005015268	EPHB4	EPH receptor B4 [Source:NCBI gene;Acc:105088565]
TLR7	toll like receptor 7	catalytic_receptor	Toll-like receptor family	ENSCDRG00005010320	TLR7	toll like receptor 7 [Source:NCBI gene;Acc:105100614]
CSF2RA	colony stimulating factor 2 receptor subunit alpha	catalytic_receptor	IL-3 receptor family	ENSCDRG00005017253	ENSCDRG00005017253	nan
NTRK1	neurotrophic receptor tyrosine kinase 1	catalytic_receptor	Type VII RTKs: Neurotrophin receptor/Trk family	ENSCDRG00005014638	NTRK1	neurotrophic receptor tyrosine kinase 1 [Source:HGNC Symbol;Acc:HGNC:8031]
BMPR2	bone morphogenetic protein receptor type 2	catalytic_receptor	Type II receptor serine/threonine kinases	ENSCDRG00005019320	BMPR2	bone morphogenetic protein receptor type 2 [Source:NCBI gene;Acc:105098972]
DDR1	discoidin domain receptor tyrosine kinase 1	catalytic_receptor	Type XVI RTKs: DDR (collagen receptor) family	ENSCDRG00005018401	DDR1	discoidin domain receptor tyrosine kinase 1 [Source:NCBI gene;Acc:105087491]
CRLF2	cytokine receptor like factor 2	catalytic_receptor	IL-2 receptor family	ENSCDRG00005017196	CRLF2	cytokine receptor like factor 2 [Source:HGNC Symbol;Acc:HGNC:14281]
ITGA1	integrin subunit alpha 1	catalytic_receptor	Integrins	ENSCDRG00005011314	ITGA1	integrin subunit alpha 1 [Source:NCBI gene;Acc:105084260]
TNFRSF25	TNF receptor superfamily member 25	catalytic_receptor	Tumour necrosis factor (TNF) receptor family	ENSCDRG00005007266	TNFRSF25	TNF receptor superfamily member 25 [Source:HGNC Symbol;Acc:HGNC:11910]
TLR9	toll like receptor 9	catalytic_receptor	Toll-like receptor family	ENSCDRG00005015908	ENSCDRG00005015908	nan
TNFRSF13B	TNF receptor superfamily member 13B	catalytic_receptor	Tumour necrosis factor (TNF) receptor family	ENSCDRG00005020617	TNFRSF13B	TNF receptor superfamily member 13B [Source:HGNC Symbol;Acc:HGNC:18153]
IL10RB	interleukin 10 receptor subunit beta	catalytic_receptor	IL-10 receptor family	ENSCDRG00005002438	ENSCDRG00005002438	interleukin 10 receptor subunit beta [Source:NCBI gene;Acc:105089870]
ITGB3	integrin subunit beta 3	catalytic_receptor	Integrins	ENSCDRG00005021709	ENSCDRG00005021709	nan

## Sheet: d
Classification of camel SON basal genes - enzymes
human_ortholog_name	HGNC name	Type	Family name	camel_ensembl_ids	camel_external_gene_names	camel_descriptions
FGR	FGR proto-oncogene, Src family tyrosine kinase	enzyme	Src family	ENSCDRG00005007737	FGR	FGR proto-oncogene, Src family tyrosine kinase [Source:HGNC Symbol;Acc:HGNC:3697]
CYP51A1	cytochrome P450 family 51 subfamily A member 1	enzyme	CYP39, CYP46 and CYP51 families	ENSCDRG00005022091	CYP51A1	cytochrome P450 family 51 subfamily A member 1 [Source:HGNC Symbol;Acc:HGNC:2649]
LAP3	leucine aminopeptidase 3	enzyme	M17: Leucyl aminopeptidase	ENSCDRG00005019557	LAP3	leucine aminopeptidase 3 [Source:NCBI gene;Acc:105098348]
CYP26B1	cytochrome P450 family 26 subfamily B member 1	enzyme	CYP24, CYP26 and CYP27 families	ENSCDRG00005018203	CYP26B1	cytochrome P450 family 26 subfamily B member 1 [Source:HGNC Symbol;Acc:HGNC:20581]
CASP10	caspase 10	enzyme	C14: Caspase	ENSCDRG00005006612	CASP10	caspase 10 [Source:HGNC Symbol;Acc:HGNC:1500]
KDM1A	lysine demethylase 1A	enzyme	1.14.11.- Histone demethylases	ENSCDRG00005014888	KDM1A	lysine demethylase 1A [Source:HGNC Symbol;Acc:HGNC:29079]
CAMKK1	calcium/calmodulin dependent protein kinase kinase 1	enzyme	Meta subfamily	ENSCDRG00005014884	CAMKK1	calcium/calmodulin dependent protein kinase kinase 1 [Source:NCBI gene;Acc:105095748]
PDK4	pyruvate dehydrogenase kinase 4	enzyme	PDHK family	ENSCDRG00005002723	PDK4	pyruvate dehydrogenase kinase 4 [Source:NCBI gene;Acc:105088722]
PRKAR2B	protein kinase cAMP-dependent type II regulatory subunit beta	enzyme	Protein kinase A (PKA) family	ENSCDRG00005007392	PRKAR2B	protein kinase cAMP-dependent type II regulatory subunit beta [Source:HGNC Symbol;Acc:HGNC:9392]
MPO	myeloperoxidase	enzyme	1.-.-.- Oxidoreductases	ENSCDRG00005022159	MPO	myeloperoxidase [Source:HGNC Symbol;Acc:HGNC:7218]
PON1	paraoxonase 1	enzyme	Paraoxonase (PON) family	ENSCDRG00005002595	PON1	paraoxonase 1 [Source:NCBI gene;Acc:105088728]
KMT2E	lysine methyltransferase 2E (inactive)	enzyme	2.1.1.43 Histone methyltransferases (HMTs)	ENSCDRG00005009824	KMT2E	lysine methyltransferase 2E [Source:NCBI gene;Acc:105093021]
PDK2	pyruvate dehydrogenase kinase 2	enzyme	PDHK family	ENSCDRG00005011691	PDK2	pyruvate dehydrogenase kinase 2 [Source:HGNC Symbol;Acc:HGNC:8810]
MAP3K14	mitogen-activated protein kinase kinase kinase 14	enzyme	STE-unique family	ENSCDRG00005006138	MAP3K14	mitogen-activated protein kinase kinase kinase 14 [Source:HGNC Symbol;Acc:HGNC:6853]
MAP3K9	mitogen-activated protein kinase kinase kinase 9	enzyme	MLK subfamily	ENSCDRG00005004539	MAP3K9	mitogen-activated protein kinase kinase kinase 9 [Source:HGNC Symbol;Acc:HGNC:6861]
KDM7A	lysine demethylase 7A	enzyme	1.14.11.- Histone demethylases	ENSCDRG00005003493	KDM7A	lysine demethylase 7A [Source:NCBI gene;Acc:105091644]
GGCT	gamma-glutamylcyclotransferase	enzyme	Leukotriene and lipoxin metabolism	ENSCDRG00005002345	ENSCDRG00005002345	gamma-glutamylcyclotransferase [Source:NCBI gene;Acc:105095846]
CDKL3	cyclin dependent kinase like 3	enzyme	Cyclin-dependent kinase-like (CDKL) family	ENSCDRG00005002942	CDKL3	cyclin dependent kinase like 3 [Source:HGNC Symbol;Acc:HGNC:15483]
MARK4	microtubule affinity regulating kinase 4	enzyme	MARK subfamily	ENSCDRG00005007201	MARK4	microtubule affinity regulating kinase 4 [Source:HGNC Symbol;Acc:HGNC:13538]
NOS2	nitric oxide synthase 2	enzyme	Nitric oxide synthases	ENSCDRG00005015637	NOS2	nitric oxide synthase 2 [Source:HGNC Symbol;Acc:HGNC:7873]
MATK	megakaryocyte-associated tyrosine kinase	enzyme	Csk family	ENSCDRG00005005153	MATK	megakaryocyte-associated tyrosine kinase [Source:NCBI gene;Acc:105102645]
NOX1	NADPH oxidase 1	enzyme	NADPH oxidases	ENSCDRG00005011525	NOX1	NADPH oxidase 1 [Source:HGNC Symbol;Acc:HGNC:7889]
PSMB1	proteasome 20S subunit beta 1	enzyme	T1: Proteasome	ENSCDRG00005018457	PSMB1	proteasome 20S subunit beta 1 [Source:NCBI gene;Acc:105093880]
CDKL5	cyclin dependent kinase like 5	enzyme	Cyclin-dependent kinase-like (CDKL) family	ENSCDRG00005015479	CDKL5	cyclin dependent kinase like 5 [Source:NCBI gene;Acc:105098065]
CAMK1G	calcium/calmodulin dependent protein kinase IG	enzyme	CAMK1 family	ENSCDRG00005007186	CAMK1G	calcium/calmodulin dependent protein kinase IG [Source:HGNC Symbol;Acc:HGNC:14585]
CDK11A	cyclin dependent kinase 11A	enzyme	PITSLRE subfamily	ENSCDRG00005007446	ENSCDRG00005007446	nan
ADAM22	ADAM metallopeptidase domain 22	enzyme	M12: Astacin/Adamalysin	ENSCDRG00005020902	ADAM22	ADAM metallopeptidase domain 22 [Source:HGNC Symbol;Acc:HGNC:201]
MMP25	matrix metallopeptidase 25	enzyme	M10: Matrix metallopeptidase	ENSCDRG00005018597	MMP25	matrix metallopeptidase 25 [Source:HGNC Symbol;Acc:HGNC:14246]
IYD	iodotyrosine deiodinase	enzyme	Thyroid hormone turnover	ENSCDRG00005020897	IYD	iodotyrosine deiodinase [Source:HGNC Symbol;Acc:HGNC:21071]
DYRK4	dual specificity tyrosine phosphorylation regulated kinase 4	enzyme	Dyrk1 subfamily	ENSCDRG00005022435	ENSCDRG00005022435	dual specificity tyrosine phosphorylation regulated kinase 4 [Source:HGNC Symbol;Acc:HGNC:3095]
PRSS3	serine protease 3	enzyme	S1: Chymotrypsin	ENSCDRG00005006071	ENSCDRG00005006071	anionic trypsin [Source:NCBI gene;Acc:105088684]
BTK	Bruton tyrosine kinase	enzyme	Tec family	ENSCDRG00005013150	BTK	Bruton tyrosine kinase [Source:NCBI gene;Acc:105085487]
FYN	FYN proto-oncogene, Src family tyrosine kinase	enzyme	Src family	ENSCDRG00005003505	FYN	FYN proto-oncogene, Src family tyrosine kinase [Source:NCBI gene;Acc:105099211]
PIK3C2A	phosphatidylinositol-4-phosphate 3-kinase catalytic subunit type 2 alpha	enzyme	Phosphatidylinositol-4-phosphate 3-kinase family	ENSCDRG00005015424	PIK3C2A	phosphatidylinositol-4-phosphate 3-kinase catalytic subunit type 2 alpha [Source:NCBI gene;Acc:105086672]
MAP4K3	mitogen-activated protein kinase kinase kinase kinase 3	enzyme	KHS subfamily	ENSCDRG00005015774	MAP4K3	mitogen-activated protein kinase kinase kinase kinase 3 [Source:HGNC Symbol;Acc:HGNC:6865]
ALOX5	arachidonate 5-lipoxygenase	enzyme	Lipoxygenases	ENSCDRG00005017469	ALOX5	arachidonate 5-lipoxygenase [Source:NCBI gene;Acc:105093424]
MAP4K5	mitogen-activated protein kinase kinase kinase kinase 5	enzyme	KHS subfamily	ENSCDRG00005000725	MAP4K5	mitogen-activated protein kinase kinase kinase kinase 5 [Source:HGNC Symbol;Acc:HGNC:6867]
CLK1	CDC like kinase 1	enzyme	CLK family	ENSCDRG00005007272	CLK1	CDC like kinase 1 [Source:NCBI gene;Acc:105099172]
CAPN1	calpain 1	enzyme	C2: Calpain	ENSCDRG00005010382	CAPN1	calpain 1 [Source:NCBI gene;Acc:105102612]
DPEP1	dipeptidase 1	enzyme	Leukotriene and lipoxin metabolism	ENSCDRG00005019995	DPEP1	dipeptidase 1 [Source:NCBI gene;Acc:105104341]
CYP24A1	cytochrome P450 family 24 subfamily A member 1	enzyme	CYP24, CYP26 and CYP27 families	ENSCDRG00005016933	CYP24A1	1,25-dihydroxyvitamin D(3) 24-hydroxylase, mitochondrial [Source:NCBI gene;Acc:105098859]
CYP3A43	cytochrome P450 family 3 subfamily A member 43	enzyme	CYP3 family	ENSCDRG00005010591	ENSCDRG00005010591	nan
PRKCH	protein kinase C eta	enzyme	Eta subfamily	ENSCDRG00005000082	ENSCDRG00005000082	nan
VRK2	VRK serine/threonine kinase 2	enzyme	Vaccina related kinase (VRK) family	ENSCDRG00005003465	VRK2	VRK serine/threonine kinase 2 [Source:NCBI gene;Acc:105097235]
BRD9	bromodomain containing 9	enzyme	Bromodomain kinase (BRDK) family	ENSCDRG00005013313	BRD9	bromodomain containing 9 [Source:HGNC Symbol;Acc:HGNC:25818]
MAP2K3	mitogen-activated protein kinase kinase 3	enzyme	STE7 family	ENSCDRG00005020669	MAP2K3	mitogen-activated protein kinase kinase 3 [Source:HGNC Symbol;Acc:HGNC:6843]
DAPK2	death associated protein kinase 2	enzyme	Death-associated kinase (DAPK) family	ENSCDRG00005000708	DAPK2	death associated protein kinase 2 [Source:HGNC Symbol;Acc:HGNC:2675]
NSMAF	neutral sphingomyelinase activation associated factor	enzyme	Neutral sphingomyelinase coupling factors	ENSCDRG00005020419	NSMAF	neutral sphingomyelinase activation associated factor [Source:HGNC Symbol;Acc:HGNC:8017]
CYP46A1	cytochrome P450 family 46 subfamily A member 1	enzyme	CYP39, CYP46 and CYP51 families	ENSCDRG00005002282	CYP46A1	cholesterol 24-hydroxylase [Source:NCBI gene;Acc:105095410]
USP2	ubiquitin specific peptidase 2	enzyme	C19: Ubiquitin-specific protease	ENSCDRG00005021255	USP2	ubiquitin specific peptidase 2 [Source:NCBI gene;Acc:105090134]
PI4K2B	phosphatidylinositol 4-kinase type 2 beta	enzyme	Phosphatidylinositol kinases	ENSCDRG00005015238	PI4K2B	phosphatidylinositol 4-kinase type 2 beta [Source:HGNC Symbol;Acc:HGNC:18215]
TRIO	trio Rho guanine nucleotide exchange factor	enzyme	Trio family	ENSCDRG00005002774	ENSCDRG00005002774	nan
INPP4A	inositol polyphosphate-4-phosphatase type I A	enzyme	Inositol polyphosphate phosphatases	ENSCDRG00005018375	INPP4A	inositol polyphosphate-4-phosphatase type I A [Source:HGNC Symbol;Acc:HGNC:6074]
PARP3	poly(ADP-ribose) polymerase family member 3	enzyme	Poly ADP-ribose polymerases	ENSCDRG00005013845	PARP3	poly(ADP-ribose) polymerase family member 3 [Source:HGNC Symbol;Acc:HGNC:273]
ADAM28	ADAM metallopeptidase domain 28	enzyme	M12: Astacin/Adamalysin	ENSCDRG00005016471	ADAM28	ADAM metallopeptidase domain 28 [Source:NCBI gene;Acc:105103044]
HDAC9	histone deacetylase 9	enzyme	3.5.1.- Histone deacetylases (HDACs)	ENSCDRG00005005657	HDAC9	histone deacetylase 9 [Source:HGNC Symbol;Acc:HGNC:14065]
RRM2B	ribonucleotide reductase regulatory TP53 inducible subunit M2B	enzyme	1.17.4.1 Ribonucleoside-diphosphate reductases	ENSCDRG00005015807	RRM2B	ribonucleotide reductase regulatory TP53 inducible subunit M2B [Source:NCBI gene;Acc:105090530]
ADAMTS6	ADAM metallopeptidase with thrombospondin type 1 motif 6	enzyme	M12: Astacin/Adamalysin	ENSCDRG00005006170	ADAMTS6	ADAM metallopeptidase with thrombospondin type 1 motif 6 [Source:NCBI gene;Acc:105084745]
MAPK9	mitogen-activated protein kinase 9	enzyme	JNK subfamily	ENSCDRG00005004915	MAPK9	mitogen-activated protein kinase 9 [Source:NCBI gene;Acc:105100625]
PIK3CB	phosphatidylinositol-4,5-bisphosphate 3-kinase catalytic subunit beta	enzyme	Phosphatidylinositol-4,5-bisphosphate 3-kinase family	ENSCDRG00005007566	PIK3CB	phosphatidylinositol-4,5-bisphosphate 3-kinase catalytic subunit beta [Source:HGNC Symbol;Acc:HGNC:8976]
PRSS8	serine protease 8	enzyme	S1: Chymotrypsin	ENSCDRG00005013480	PRSS8	serine protease 8 [Source:HGNC Symbol;Acc:HGNC:9491]
ENTPD2	ectonucleoside triphosphate diphosphohydrolase 2	enzyme	Hydrolases	ENSCDRG00005022266	ENTPD2	ectonucleoside triphosphate diphosphohydrolase 2 [Source:HGNC Symbol;Acc:HGNC:3364]
EIF2AK2	eukaryotic translation initiation factor 2 alpha kinase 2	enzyme	Other PEK family kinases	ENSCDRG00005017216	EIF2AK2	eukaryotic translation initiation factor 2 alpha kinase 2 [Source:HGNC Symbol;Acc:HGNC:9437]
KMT2C	lysine methyltransferase 2C	enzyme	2.1.1.43 Histone methyltransferases (HMTs)	ENSCDRG00005012745	KMT2C	lysine methyltransferase 2C [Source:HGNC Symbol;Acc:HGNC:13726]
F7	coagulation factor VII	enzyme	S1: Chymotrypsin	ENSCDRG00005009648	F7	coagulation factor VII [Source:NCBI gene;Acc:105091336]
CDK14	cyclin dependent kinase 14	enzyme	TAIRE subfamily	ENSCDRG00005022033	CDK14	cyclin dependent kinase 14 [Source:NCBI gene;Acc:105087375]
CAMK2B	calcium/calmodulin dependent protein kinase II beta	enzyme	CAMK2 family	ENSCDRG00005003656	CAMK2B	calcium/calmodulin dependent protein kinase II beta [Source:HGNC Symbol;Acc:HGNC:1461]
RIOK2	RIO kinase 2	enzyme	RIO2 subfamily	ENSCDRG00005008601	RIOK2	RIO kinase 2 [Source:NCBI gene;Acc:105100899]
TBXAS1	thromboxane A synthase 1	enzyme	CYP5, CYP7 and CYP8 families	ENSCDRG00005003325	TBXAS1	thromboxane A synthase 1 [Source:NCBI gene;Acc:105091642]
CDK17	cyclin dependent kinase 17	enzyme	TAIRE subfamily	ENSCDRG00005019682	CDK17	cyclin dependent kinase 17 [Source:NCBI gene;Acc:105097435]
WNK1	WNK lysine deficient protein kinase 1	enzyme	Wnk family	ENSCDRG00005022387	WNK1	WNK lysine deficient protein kinase 1 [Source:HGNC Symbol;Acc:HGNC:14540]
HDAC7	histone deacetylase 7	enzyme	3.5.1.- Histone deacetylases (HDACs)	ENSCDRG00005012006	HDAC7	histone deacetylase 7 [Source:HGNC Symbol;Acc:HGNC:14067]
TNK2	tyrosine kinase non receptor 2	enzyme	Ack family	ENSCDRG00005020108	TNK2	tyrosine kinase non receptor 2 [Source:HGNC Symbol;Acc:HGNC:19297]
SPHK2	sphingosine kinase 2	enzyme	Sphingosine kinase	ENSCDRG00005002154	SPHK2	sphingosine kinase 2 [Source:NCBI gene;Acc:105102906]
ADCK1	aarF domain containing kinase 1	enzyme	ABC1-B subfamily	ENSCDRG00005002093	ADCK1	aarF domain containing kinase 1 [Source:HGNC Symbol;Acc:HGNC:19038]
CASP8	caspase 8	enzyme	C14: Caspase	ENSCDRG00005006441	CASP8	caspase 8 [Source:NCBI gene;Acc:105099181]
HIPK2	homeodomain interacting protein kinase 2	enzyme	HIPK subfamily	ENSCDRG00005003145	HIPK2	homeodomain interacting protein kinase 2 [Source:NCBI gene;Acc:105091640]
CTSA	cathepsin A	enzyme	S10: Carboxypeptidase Y	ENSCDRG00005019078	CTSA	cathepsin A [Source:NCBI gene;Acc:105087842]
PKN2	protein kinase N2	enzyme	Protein kinase N (PKN) family	ENSCDRG00005014192	PKN2	protein kinase N2 [Source:HGNC Symbol;Acc:HGNC:9406]
MYLK	myosin light chain kinase	enzyme	Myosin Light Chain Kinase (MLCK) family	ENSCDRG00005006122	MYLK	myosin light chain kinase [Source:HGNC Symbol;Acc:HGNC:7590]
MAP2K4	mitogen-activated protein kinase kinase 4	enzyme	STE7 family	ENSCDRG00005009003	MAP2K4	mitogen-activated protein kinase kinase 4 [Source:HGNC Symbol;Acc:HGNC:6844]
SLK	STE20 like kinase	enzyme	SLK subfamily	ENSCDRG00005010331	SLK	STE20 like kinase [Source:NCBI gene;Acc:105095007]
PRKCQ	protein kinase C theta	enzyme	Delta subfamily	ENSCDRG00005014053	PRKCQ	protein kinase C theta [Source:HGNC Symbol;Acc:HGNC:9410]
CDK13	cyclin dependent kinase 13	enzyme	CRK7 subfamily	ENSCDRG00005012070	CDK13	cyclin dependent kinase 13 [Source:HGNC Symbol;Acc:HGNC:1733]
PDE4A	phosphodiesterase 4A	enzyme	Phosphodiesterases, 3',5'-cyclic nucleotide (PDEs)	ENSCDRG00005007237	PDE4A	phosphodiesterase 4A [Source:HGNC Symbol;Acc:HGNC:8780]
KDM4A	lysine demethylase 4A	enzyme	1.14.11.- Histone demethylases	ENSCDRG00005009834	ENSCDRG00005009834	nan
IDI1	isopentenyl-diphosphate delta isomerase 1	enzyme	Lanosterol biosynthesis pathway	ENSCDRG00005018970	IDI1	isopentenyl-diphosphate delta isomerase 1 [Source:HGNC Symbol;Acc:HGNC:5387]
PLPP1	phospholipid phosphatase 1	enzyme	Lipid phosphate phosphatases	ENSCDRG00005008478	PLPP1	phospholipid phosphatase 1 [Source:NCBI gene;Acc:105087144]
PKM	pyruvate kinase M1/2	enzyme	2.7.1.40 Pyruvate kinases	ENSCDRG00005010645	PARP6	nan
PRKCZ	protein kinase C zeta	enzyme	Iota subfamily	ENSCDRG00005011558	PRKCZ	protein kinase C zeta [Source:HGNC Symbol;Acc:HGNC:9412]
ROCK1	Rho associated coiled-coil containing protein kinase 1	enzyme	Rho kinase	ENSCDRG00005020081	ROCK1	Rho associated coiled-coil containing protein kinase 1 [Source:NCBI gene;Acc:105086272]
PDK3	pyruvate dehydrogenase kinase 3	enzyme	PDHK family	ENSCDRG00005021688	PDK3	pyruvate dehydrogenase kinase 3 [Source:NCBI gene;Acc:105103897]
HDAC4	histone deacetylase 4	enzyme	3.5.1.- Histone deacetylases (HDACs)	ENSCDRG00005016731	HDAC4	histone deacetylase 4 [Source:HGNC Symbol;Acc:HGNC:14063]
INPP5A	inositol polyphosphate-5-phosphatase A	enzyme	Inositol polyphosphate phosphatases	ENSCDRG00005002849	INPP5A	inositol polyphosphate-5-phosphatase A [Source:NCBI gene;Acc:105104581]
SIRT2	sirtuin 2	enzyme	3.5.1.- Histone deacetylases (HDACs)	ENSCDRG00005014318	SIRT2	sirtuin 2 [Source:HGNC Symbol;Acc:HGNC:10886]
MAST4	microtubule associated serine/threonine kinase family member 4	enzyme	MAST family	ENSCDRG00005005143	MAST4	microtubule associated serine/threonine kinase family member 4 [Source:HGNC Symbol;Acc:HGNC:19037]
ADAM7	ADAM metallopeptidase domain 7	enzyme	M12: Astacin/Adamalysin	ENSCDRG00005017257	ADAM7	ADAM metallopeptidase domain 7 [Source:NCBI gene;Acc:105103032]
MAOB	monoamine oxidase B	enzyme	Catecholamine turnover	ENSCDRG00005020569	MAOB	monoamine oxidase B [Source:NCBI gene;Acc:105085264]
PLA2G10	phospholipase A2 group X	enzyme	Phospholipase A<sub>2</sub>	ENSCDRG00005013514	PLA2G10	phospholipase A2 group X [Source:HGNC Symbol;Acc:HGNC:9029]
MAPK6	mitogen-activated protein kinase 6	enzyme	ERK subfamily	ENSCDRG00005017187	MAPK6	mitogen-activated protein kinase 6 [Source:NCBI gene;Acc:105086622]
RAB27A	RAB27A, member RAS oncogene family	enzyme	RAB subfamily	ENSCDRG00005016015	RAB27A	RAB27A, member RAS oncogene family [Source:NCBI gene;Acc:105088677]
JMJD6	jumonji domain containing 6, arginine demethylase and lysine hydroxylase	enzyme	1.14.11.- Histone demethylases	ENSCDRG00005021223	JMJD6	jumonji domain containing 6, arginine demethylase and lysine hydroxylase [Source:HGNC Symbol;Acc:HGNC:19355]
CHAT	choline O-acetyltransferase	enzyme	Acetylcholine turnover	ENSCDRG00005016217	CHAT	choline O-acetyltransferase [Source:NCBI gene;Acc:105093435]
TESK2	testis associated actin remodelling kinase 2	enzyme	TESK subfamily	ENSCDRG00005017947	TESK2	testis associated actin remodelling kinase 2 [Source:HGNC Symbol;Acc:HGNC:11732]
CSNK2A2	casein kinase 2 alpha 2	enzyme	Casein kinase 2 (CK2) family	ENSCDRG00005005512	CSNK2A2	casein kinase 2 alpha 2 [Source:HGNC Symbol;Acc:HGNC:2459]
CAMK2A	calcium/calmodulin dependent protein kinase II alpha	enzyme	CAMK2 family	ENSCDRG00005002212	CAMK2A	calcium/calmodulin dependent protein kinase II alpha [Source:HGNC Symbol;Acc:HGNC:1460]
MAP4K4	mitogen-activated protein kinase kinase kinase kinase 4	enzyme	MSN subfamily	ENSCDRG00005005064	MAP4K4	mitogen-activated protein kinase kinase kinase kinase 4 [Source:HGNC Symbol;Acc:HGNC:6866]
RPS6KA2	ribosomal protein S6 kinase A2	enzyme	RSK subfamily	ENSCDRG00005008268	RPS6KA2	ribosomal protein S6 kinase A2 [Source:HGNC Symbol;Acc:HGNC:10431]
TRIB2	tribbles pseudokinase 2	enzyme	Trbl family	ENSCDRG00005004180	TRIB2	tribbles pseudokinase 2 [Source:NCBI gene;Acc:105097173]
MYO3B	myosin IIIB	enzyme	NinaC subfamily	ENSCDRG00005011274	MYO3B	myosin IIIB [Source:HGNC Symbol;Acc:HGNC:15576]
PRKACA	protein kinase cAMP-activated catalytic subunit alpha	enzyme	Protein kinase A (PKA) family	ENSCDRG00005015856	PRKACA	protein kinase cAMP-activated catalytic subunit alpha [Source:NCBI gene;Acc:105100776]
RPS6KA6	ribosomal protein S6 kinase A6	enzyme	RSK subfamily	ENSCDRG00005021214	RPS6KA6	ribosomal protein S6 kinase A6 [Source:NCBI gene;Acc:105097177]
SPEG	striated muscle enriched protein kinase	enzyme	Trio family	ENSCDRG00005001244	SPEG	striated muscle enriched protein kinase [Source:HGNC Symbol;Acc:HGNC:16901]
MARK2	microtubule affinity regulating kinase 2	enzyme	MARK subfamily	ENSCDRG00005019188	MARK2	microtubule affinity regulating kinase 2 [Source:HGNC Symbol;Acc:HGNC:3332]
TRHDE	thyrotropin releasing hormone degrading enzyme	enzyme	M1: Aminopeptidase N	ENSCDRG00005017523	TRHDE	thyrotropin releasing hormone degrading enzyme [Source:HGNC Symbol;Acc:HGNC:30748]
STK10	serine/threonine kinase 10	enzyme	SLK subfamily	ENSCDRG00005005406	STK10	serine/threonine kinase 10 [Source:NCBI gene;Acc:105089375]
CYP2W1	cytochrome P450 family 2 subfamily W member 1	enzyme	CYP2 family	ENSCDRG00005018099	CYP2W1	cytochrome P450 2W1 [Source:NCBI gene;Acc:105105873]
ALPK1	alpha kinase 1	enzyme	Other alpha kinase family kinases	ENSCDRG00005007933	ALPK1	alpha kinase 1 [Source:HGNC Symbol;Acc:HGNC:20917]
PDE8A	phosphodiesterase 8A	enzyme	Phosphodiesterases, 3',5'-cyclic nucleotide (PDEs)	ENSCDRG00005014212	PDE8A	phosphodiesterase 8A [Source:HGNC Symbol;Acc:HGNC:8793]
KDM5A	lysine demethylase 5A	enzyme	1.14.11.- Histone demethylases	ENSCDRG00005022392	KDM5A	lysine demethylase 5A [Source:NCBI gene;Acc:105102938]
ADAM11	ADAM metallopeptidase domain 11	enzyme	M12: Astacin/Adamalysin	ENSCDRG00005004070	ADAM11	ADAM metallopeptidase domain 11 [Source:HGNC Symbol;Acc:HGNC:189]
PTGS2	prostaglandin-endoperoxide synthase 2	enzyme	Cyclooxygenase	ENSCDRG00005016525	PTGS2	prostaglandin-endoperoxide synthase 2 [Source:NCBI gene;Acc:105099289]
MAP3K13	mitogen-activated protein kinase kinase kinase 13	enzyme	LZK subfamily	ENSCDRG00005003966	MAP3K13	mitogen-activated protein kinase kinase kinase 13 [Source:HGNC Symbol;Acc:HGNC:6852]
EED	embryonic ectoderm development	enzyme	Neutral sphingomyelinase coupling factors	ENSCDRG00005007103	EED	embryonic ectoderm development [Source:NCBI gene;Acc:105097875]
CA12	carbonic anhydrase 12	enzyme	Carbonic anhydrases	ENSCDRG00005003913	CA12	carbonic anhydrase 12 [Source:NCBI gene;Acc:105101792]
MGLL	monoglyceride lipase	enzyme	2-Acylglycerol ester turnover	ENSCDRG00005011712	MGLL	monoglyceride lipase [Source:NCBI gene;Acc:105090112]
NUAK1	NUAK family kinase 1	enzyme	NuaK subfamily	ENSCDRG00005018419	NUAK1	NUAK family kinase 1 [Source:NCBI gene;Acc:105102967]
DPP8	dipeptidyl peptidase 8	enzyme	S9: Prolyl oligopeptidase	ENSCDRG00005001839	DPP8	dipeptidyl peptidase 8 [Source:HGNC Symbol;Acc:HGNC:16490]
NOX3	NADPH oxidase 3	enzyme	NADPH oxidases	ENSCDRG00005018725	NOX3	NADPH oxidase 3 [Source:NCBI gene;Acc:105100944]
TXK	TXK tyrosine kinase	enzyme	Tec family	ENSCDRG00005003102	TXK	TXK tyrosine kinase [Source:NCBI gene;Acc:105099939]
ACAT1	acetyl-CoA acetyltransferase 1	enzyme	Lanosterol biosynthesis pathway	ENSCDRG00005021788	ACAT1	acetyl-CoA acetyltransferase 1 [Source:NCBI gene;Acc:105096605]
MARK3	microtubule affinity regulating kinase 3	enzyme	MARK subfamily	ENSCDRG00005006645	MARK3	microtubule affinity regulating kinase 3 [Source:NCBI gene;Acc:105103448]
PLD1	phospholipase D1	enzyme	Phosphatidylcholine-specific phospholipase D	ENSCDRG00005008849	PLD1	phospholipase D1 [Source:HGNC Symbol;Acc:HGNC:9067]
ACACB	acetyl-CoA carboxylase beta	enzyme	Carboxylases	ENSCDRG00005009548	UNG	acetyl-CoA carboxylase beta [Source:NCBI gene;Acc:105105357]
NT5C2	5'-nucleotidase, cytosolic II	enzyme	Adenosine turnover	ENSCDRG00005012355	NT5C2	5'-nucleotidase, cytosolic II [Source:NCBI gene;Acc:105095018]
MAP2K7	mitogen-activated protein kinase kinase 7	enzyme	STE7 family	ENSCDRG00005013675	MAP2K7	mitogen-activated protein kinase kinase 7 [Source:HGNC Symbol;Acc:HGNC:6847]
PAK3	p21 (RAC1) activated kinase 3	enzyme	PAKA subfamily	ENSCDRG00005015076	PAK3	p21 (RAC1) activated kinase 3 [Source:HGNC Symbol;Acc:HGNC:8592]
SIRT6	sirtuin 6	enzyme	3.5.1.- Histone deacetylases (HDACs)	ENSCDRG00005004643	ENSCDRG00005004643	nan
TYR	tyrosinase	enzyme	1.-.-.- Oxidoreductases	ENSCDRG00005009674	TYR	tyrosinase [Source:HGNC Symbol;Acc:HGNC:12442]
NAALAD2	N-acetylated alpha-linked acidic dipeptidase 2	enzyme	M28: Aminopeptidase Y	ENSCDRG00005011284	NAALAD2	N-acetylated alpha-linked acidic dipeptidase 2 [Source:HGNC Symbol;Acc:HGNC:14526]
ARAF	A-Raf proto-oncogene, serine/threonine kinase	enzyme	RAF family	ENSCDRG00005015814	ARAF	A-Raf proto-oncogene, serine/threonine kinase [Source:HGNC Symbol;Acc:HGNC:646]
FAP	fibroblast activation protein alpha	enzyme	S9: Prolyl oligopeptidase	ENSCDRG00005003579	FAP	fibroblast activation protein alpha [Source:NCBI gene;Acc:105093687]
ACER3	alkaline ceramidase 3	enzyme	Alkaline ceramidases	ENSCDRG00005004836	ACER3	alkaline ceramidase 3 [Source:HGNC Symbol;Acc:HGNC:16066]
PIK3C3	phosphatidylinositol 3-kinase catalytic subunit type 3	enzyme	Phosphatidylinositol 3-kinase family	ENSCDRG00005003740	PIK3C3	phosphatidylinositol 3-kinase catalytic subunit type 3 [Source:HGNC Symbol;Acc:HGNC:8974]
SYNJ2	synaptojanin 2	enzyme	Inositol polyphosphate phosphatases	ENSCDRG00005016839	SYNJ2	synaptojanin 2 [Source:HGNC Symbol;Acc:HGNC:11504]
ADCY2	adenylate cyclase 2	enzyme	Adenylyl cyclases (ACs)	ENSCDRG00005004299	ADCY2	adenylate cyclase 2 [Source:HGNC Symbol;Acc:HGNC:233]
MKNK1	MAPK interacting serine/threonine kinase 1	enzyme	MKN subfamily	ENSCDRG00005019138	MKNK1	MAPK interacting serine/threonine kinase 1 [Source:NCBI gene;Acc:105092927]
RAPGEF3	Rap guanine nucleotide exchange factor 3	enzyme	Exchange protein activated by cyclic AMP (EPACs)	ENSCDRG00005012525	RAPGEF3	Rap guanine nucleotide exchange factor 3 [Source:HGNC Symbol;Acc:HGNC:16629]
SENP1	SUMO specific peptidase 1	enzyme	C48: Ulp1 endopeptidase	ENSCDRG00005011059	SENP1	SUMO specific peptidase 1 [Source:NCBI gene;Acc:105103801]
LIPE	lipase E, hormone sensitive type	enzyme	Hydrolases	ENSCDRG00005017218	LIPE	lipase E, hormone sensitive type [Source:NCBI gene;Acc:105090211]
FDFT1	farnesyl-diphosphate farnesyltransferase 1	enzyme	Lanosterol biosynthesis pathway	ENSCDRG00005010723	FDFT1	farnesyl-diphosphate farnesyltransferase 1 [Source:NCBI gene;Acc:105101899]
CPB2	carboxypeptidase B2	enzyme	M14: Carboxypeptidase A	ENSCDRG00005007487	CPB2	carboxypeptidase B2 [Source:NCBI gene;Acc:105089749]
PSEN1	presenilin 1	enzyme	A22: Presenilin	ENSCDRG00005006235	PSEN1	presenilin 1 [Source:NCBI gene;Acc:105086131]
MOK	MOK protein kinase	enzyme	RCK family	ENSCDRG00005005668	MOK	MOK protein kinase [Source:HGNC Symbol;Acc:HGNC:9833]
ARG2	arginase 2	enzyme	Arginase	ENSCDRG00005002812	ARG2	arginase 2 [Source:NCBI gene;Acc:105086166]
STK17B	serine/threonine kinase 17b	enzyme	Death-associated kinase (DAPK) family	ENSCDRG00005013318	STK17B	serine/threonine kinase 17b [Source:NCBI gene;Acc:105088796]
STRADB	STE20 related adaptor beta	enzyme	STLK subfamily	ENSCDRG00005021435	STRADB	STE20 related adaptor beta [Source:NCBI gene;Acc:105098961]
GSK3B	glycogen synthase kinase 3 beta	enzyme	GSK subfamily	ENSCDRG00005010672	GSK3B	glycogen synthase kinase 3 beta [Source:NCBI gene;Acc:105090321]
KAT6A	lysine acetyltransferase 6A	enzyme	2.3.1.48 Histone acetyltransferases (HATs)	ENSCDRG00005019843	ENSCDRG00005019843	nan
ULK2	unc-51 like autophagy activating kinase 2	enzyme	Unc-51-like kinase (ULK) family	ENSCDRG00005016642	ULK2	unc-51 like autophagy activating kinase 2 [Source:HGNC Symbol;Acc:HGNC:13480]
NCOA1	nuclear receptor coactivator 1	enzyme	2.3.1.48 Histone acetyltransferases (HATs)	ENSCDRG00005008961	NCOA1	nuclear receptor coactivator 1 [Source:NCBI gene;Acc:105100028]
PREP	prolyl endopeptidase	enzyme	S9: Prolyl oligopeptidase	ENSCDRG00005010990	PREP	prolyl endopeptidase [Source:NCBI gene;Acc:105097139]
MAP3K4	mitogen-activated protein kinase kinase kinase 4	enzyme	STE11 family	ENSCDRG00005011806	MAP3K4	mitogen-activated protein kinase kinase kinase 4 [Source:HGNC Symbol;Acc:HGNC:6856]
AKR1B1	aldo-keto reductase family 1 member B	enzyme	1.-.-.- Oxidoreductases	ENSCDRG00005001802	AKR1B1	aldo-keto reductase family 1 member B [Source:NCBI gene;Acc:105085402]
MAST2	microtubule associated serine/threonine kinase 2	enzyme	MAST family	ENSCDRG00005018575	MAST2	microtubule associated serine/threonine kinase 2 [Source:HGNC Symbol;Acc:HGNC:19035]
FOLH1	folate hydrolase 1	enzyme	M28: Aminopeptidase Y	ENSCDRG00005010235	FOLH1	folate hydrolase 1B [Source:NCBI gene;Acc:105088594]
EIF2AK1	eukaryotic translation initiation factor 2 alpha kinase 1	enzyme	Other PEK family kinases	ENSCDRG00005014748	EIF2AK1	eukaryotic translation initiation factor 2 alpha kinase 1 [Source:HGNC Symbol;Acc:HGNC:24921]
ITPKC	inositol-trisphosphate 3-kinase C	enzyme	Inositol 1,4,5-trisphosphate 3-kinases	ENSCDRG00005013084	ITPKC	inositol-trisphosphate 3-kinase C [Source:NCBI gene;Acc:105093350]
HSD17B2	hydroxysteroid 17-beta dehydrogenase 2	enzyme	1.-.-.- Oxidoreductases	ENSCDRG00005001133	HSD17B2	hydroxysteroid 17-beta dehydrogenase 2 [Source:NCBI gene;Acc:105089442]
NOX4	NADPH oxidase 4	enzyme	NADPH oxidases	ENSCDRG00005009765	NOX4	NADPH oxidase 4 [Source:NCBI gene;Acc:105088593]
ACHE	acetylcholinesterase (Cartwright blood group)	enzyme	Acetylcholine turnover	ENSCDRG00005014935	ACHE	acetylcholinesterase (Cartwright blood group) [Source:NCBI gene;Acc:105088569]
NLK	nemo like kinase	enzyme	nmo subfamily	ENSCDRG00005015472	NLK	nemo like kinase [Source:HGNC Symbol;Acc:HGNC:29858]
ADAMTS2	ADAM metallopeptidase with thrombospondin type 1 motif 2	enzyme	M12: Astacin/Adamalysin	ENSCDRG00005005953	ADAMTS2	ADAM metallopeptidase with thrombospondin type 1 motif 2 [Source:HGNC Symbol;Acc:HGNC:218]
MMP2	matrix metallopeptidase 2	enzyme	M10: Matrix metallopeptidase	ENSCDRG00005001638	MMP2	matrix metallopeptidase 2 [Source:HGNC Symbol;Acc:HGNC:7166]
AURKA	aurora kinase A	enzyme	Aurora kinase (Aur) family	ENSCDRG00005017220	AURKA	aurora kinase A [Source:NCBI gene;Acc:105098852]
FKBP1A	FKBP prolyl isomerase 1A	enzyme	5.2.-.- Cis-trans-isomerases	ENSCDRG00005013131	ENSCDRG00005013131	nan
CPXM1	carboxypeptidase X, M14 family member 1	enzyme	M14: Carboxypeptidase A	ENSCDRG00005010145	CPXM1	carboxypeptidase X, M14 family member 1 [Source:HGNC Symbol;Acc:HGNC:15771]
F11	coagulation factor XI	enzyme	S1: Chymotrypsin	ENSCDRG00005011714	F11	coagulation factor XI [Source:HGNC Symbol;Acc:HGNC:3529]
MAPKAPK5	MAPK activated protein kinase 5	enzyme	MAPKAPK subfamily	ENSCDRG00005005413	MAPKAPK5	MAPK activated protein kinase 5 [Source:NCBI gene;Acc:105102475]
RBBP9	RB binding protein 9, serine hydrolase	enzyme	3.1.1.- Carboxylic Ester Hydrolases	ENSCDRG00005003649	RBBP9	RB binding protein 9, serine hydrolase [Source:NCBI gene;Acc:105094132]
KDM2B	lysine demethylase 2B	enzyme	1.14.11.- Histone demethylases	ENSCDRG00005018719	KDM2B	lysine demethylase 2B [Source:NCBI gene;Acc:105102511]
TASP1	taspase 1	enzyme	T2: Glycosylasparaginase precursor	ENSCDRG00005006017	TASP1	taspase 1 [Source:NCBI gene;Acc:105088316]
SIRT4	sirtuin 4	enzyme	3.5.1.- Histone deacetylases (HDACs)	ENSCDRG00005018239	SIRT4	sirtuin 4 [Source:NCBI gene;Acc:105102000]
NOS1	nitric oxide synthase 1	enzyme	Nitric oxide synthases	ENSCDRG00005016703	NOS1	nitric oxide synthase 1 [Source:NCBI gene;Acc:105104911]
SPTLC1	serine palmitoyltransferase long chain base subunit 1	enzyme	Serine palmitoyltransferase	ENSCDRG00005017743	SPTLC1	serine palmitoyltransferase long chain base subunit 1 [Source:NCBI gene;Acc:105094537]
IRAK3	interleukin 1 receptor associated kinase 3	enzyme	Interleukin-1 receptor-associated kinase (IRAK) family	ENSCDRG00005012209	IRAK3	interleukin 1 receptor associated kinase 3 [Source:NCBI gene;Acc:105101095]
CERS4	ceramide synthase 4	enzyme	Ceramide synthase	ENSCDRG00005011543	CERS4	ceramide synthase 4 [Source:HGNC Symbol;Acc:HGNC:23747]
RAPGEF4	Rap guanine nucleotide exchange factor 4	enzyme	Exchange protein activated by cyclic AMP (EPACs)	ENSCDRG00005001089	RAPGEF4	Rap guanine nucleotide exchange factor 4 [Source:HGNC Symbol;Acc:HGNC:16626]
MAP3K20	mitogen-activated protein kinase kinase kinase 20	enzyme	MLK subfamily	ENSCDRG00005001310	MAP3K20	mitogen-activated protein kinase kinase kinase 20 [Source:HGNC Symbol;Acc:HGNC:17797]
CPA1	carboxypeptidase A1	enzyme	M14: Carboxypeptidase A	ENSCDRG00005001124	CPA1	carboxypeptidase A1 [Source:NCBI gene;Acc:105085388]
CMA1	chymase 1	enzyme	S1: Chymotrypsin	ENSCDRG00005007233	ENSCDRG00005007233	nan
COMT	catechol-O-methyltransferase	enzyme	Catecholamine turnover	ENSCDRG00005018572	COMT	catechol-O-methyltransferase [Source:NCBI gene;Acc:105106445]
HDAC6	histone deacetylase 6	enzyme	3.5.1.- Histone deacetylases (HDACs)	ENSCDRG00005017433	HDAC6	histone deacetylase 6 [Source:HGNC Symbol;Acc:HGNC:14064]
MAP3K1	mitogen-activated protein kinase kinase kinase 1	enzyme	STE11 family	ENSCDRG00005005939	MAP3K1	mitogen-activated protein kinase kinase kinase 1 [Source:HGNC Symbol;Acc:HGNC:6848]
PTGS1	prostaglandin-endoperoxide synthase 1	enzyme	Cyclooxygenase	ENSCDRG00005008480	PTGS1	prostaglandin-endoperoxide synthase 1 [Source:NCBI gene;Acc:105104317]
PDE6C	phosphodiesterase 6C	enzyme	Phosphodiesterases, 3',5'-cyclic nucleotide (PDEs)	ENSCDRG00005014502	PDE6C	phosphodiesterase 6C [Source:NCBI gene;Acc:105084241]
CYP26A1	cytochrome P450 family 26 subfamily A member 1	enzyme	CYP24, CYP26 and CYP27 families	ENSCDRG00005015291	CYP26A1	cytochrome P450 family 26 subfamily A member 1 [Source:HGNC Symbol;Acc:HGNC:2603]
MYO3A	myosin IIIA	enzyme	NinaC subfamily	ENSCDRG00005008724	MYO3A	myosin IIIA [Source:NCBI gene;Acc:105102076]
SRPK1	SRSF protein kinase 1	enzyme	SRPK family	ENSCDRG00005010390	SRPK1	SRSF protein kinase 1 [Source:NCBI gene;Acc:105101342]
PGC	progastricsin	enzyme	A1: Pepsin	ENSCDRG00005017765	PGC	progastricsin [Source:NCBI gene;Acc:105086751]
SIRT1	sirtuin 1	enzyme	3.5.1.- Histone deacetylases (HDACs)	ENSCDRG00005016069	SIRT1	sirtuin 1 [Source:HGNC Symbol;Acc:HGNC:14929]
JAK2	Janus kinase 2	enzyme	Janus kinase (JakA) family	ENSCDRG00005004520	JAK2	Janus kinase 2 [Source:NCBI gene;Acc:105101970]
ABL1	ABL proto-oncogene 1, non-receptor tyrosine kinase	enzyme	Abl family	ENSCDRG00005006992	ABL1	ABL proto-oncogene 1, non-receptor tyrosine kinase [Source:NCBI gene;Acc:105092528]
CDC7	cell division cycle 7	enzyme	CDC7 family	ENSCDRG00005003004	CDC7	cell division cycle 7 [Source:NCBI gene;Acc:105085464]
PCSK5	proprotein convertase subtilisin/kexin type 5	enzyme	S8: Subtilisin	ENSCDRG00005000104	PCSK5	proprotein convertase subtilisin/kexin type 5 [Source:NCBI gene;Acc:105087403]
MAST3	microtubule associated serine/threonine kinase 3	enzyme	MAST family	ENSCDRG00005012259	MAST3	microtubule associated serine/threonine kinase 3 [Source:HGNC Symbol;Acc:HGNC:19036]
MKNK2	MAPK interacting serine/threonine kinase 2	enzyme	MKN subfamily	ENSCDRG00005011258	MKNK2	MAPK interacting serine/threonine kinase 2 [Source:HGNC Symbol;Acc:HGNC:7111]
MMP11	matrix metallopeptidase 11	enzyme	M10: Matrix metallopeptidase	ENSCDRG00005021992	MMP11	matrix metallopeptidase 11 [Source:HGNC Symbol;Acc:HGNC:7157]
MAPK1	mitogen-activated protein kinase 1	enzyme	ERK subfamily	ENSCDRG00005021983	MAPK1	mitogen-activated protein kinase 1 [Source:HGNC Symbol;Acc:HGNC:6871]
GRK3	G protein-coupled receptor kinase 3	enzyme	Beta-adrenergic receptor kinases (&beta;ARKs)	ENSCDRG00005020843	GRK3	G protein-coupled receptor kinase 3 [Source:HGNC Symbol;Acc:HGNC:290]
PLA2G3	phospholipase A2 group III	enzyme	Phospholipase A<sub>2</sub>	ENSCDRG00005012238	PLA2G3	phospholipase A2 group III [Source:HGNC Symbol;Acc:HGNC:17934]
CYP2D6	cytochrome P450 family 2 subfamily D member 6	enzyme	CYP2 family	ENSCDRG00005004461	ENSCDRG00005004461	cytochrome P450 2D14 [Source:NCBI gene;Acc:105091879]
HMOX1	heme oxygenase 1	enzyme	Haem oxygenase	ENSCDRG00005020203	HMOX1	heme oxygenase 1 [Source:HGNC Symbol;Acc:HGNC:5013]
ACR	acrosin	enzyme	S1: Chymotrypsin	ENSCDRG00005004144	ACR	acrosin [Source:HGNC Symbol;Acc:HGNC:126]
CERK	ceramide kinase	enzyme	Ceramide kinase	ENSCDRG00005013310	CERK	ceramide kinase [Source:HGNC Symbol;Acc:HGNC:19256]
BRD1	bromodomain containing 1	enzyme	Bromodomain kinase (BRDK) family	ENSCDRG00005013817	BRD1	bromodomain containing 1 [Source:HGNC Symbol;Acc:HGNC:1102]
HDAC10	histone deacetylase 10	enzyme	3.5.1.- Histone deacetylases (HDACs)	ENSCDRG00005015046	HDAC10	histone deacetylase 10 [Source:NCBI gene;Acc:105090357]
CTSG	cathepsin G	enzyme	S1: Chymotrypsin	ENSCDRG00005007532	CTSG	cathepsin G [Source:NCBI gene;Acc:105106639]
GZMB	granzyme B	enzyme	S1: Chymotrypsin	ENSCDRG00005007583	GZMB	granzyme B [Source:HGNC Symbol;Acc:HGNC:4709]
PRMT5	protein arginine methyltransferase 5	enzyme	2.1.1.- Protein arginine N-methyltransferases	ENSCDRG00005007871	PRMT5	protein arginine methyltransferase 5 [Source:NCBI gene;Acc:105096972]
CDKL1	cyclin dependent kinase like 1	enzyme	Cyclin-dependent kinase-like (CDKL) family	ENSCDRG00005000667	CDKL1	cyclin dependent kinase like 1 [Source:NCBI gene;Acc:105091406]
SPTLC2	serine palmitoyltransferase long chain base subunit 2	enzyme	Serine palmitoyltransferase	ENSCDRG00005002026	SPTLC2	serine palmitoyltransferase long chain base subunit 2 [Source:HGNC Symbol;Acc:HGNC:11278]
LGMN	legumain	enzyme	C13: Legumain	ENSCDRG00005000627	LGMN	legumain [Source:NCBI gene;Acc:105095852]
VRK1	VRK serine/threonine kinase 1	enzyme	Vaccina related kinase (VRK) family	ENSCDRG00005002169	VRK1	VRK serine/threonine kinase 1 [Source:NCBI gene;Acc:105095457]
RPS6KA5	ribosomal protein S6 kinase A5	enzyme	MSK subfamily	ENSCDRG00005004764	RPS6KA5	ribosomal protein S6 kinase A5 [Source:HGNC Symbol;Acc:HGNC:10434]
PSMB5	proteasome 20S subunit beta 5	enzyme	T1: Proteasome	ENSCDRG00005008563	PSMB5	proteasome 20S subunit beta 5 [Source:NCBI gene;Acc:105096978]
MMP9	matrix metallopeptidase 9	enzyme	M10: Matrix metallopeptidase	ENSCDRG00005019520	MMP9	matrix metallopeptidase 9 [Source:HGNC Symbol;Acc:HGNC:7176]
ABHD12	abhydrolase domain containing 12, lysophospholipase	enzyme	2-Acylglycerol ester turnover	ENSCDRG00005018892	ABHD12	abhydrolase domain containing 12 [Source:HGNC Symbol;Acc:HGNC:15868]
SGK2	serum/glucocorticoid regulated kinase 2	enzyme	SGK family	ENSCDRG00005011945	SGK2	serum/glucocorticoid regulated kinase 2 [Source:NCBI gene;Acc:105087124]
STK4	serine/threonine kinase 4	enzyme	MST subfamily	ENSCDRG00005013973	STK4	serine/threonine kinase 4 [Source:NCBI gene;Acc:105087816]
CTSZ	cathepsin Z	enzyme	C1: Papain	ENSCDRG00005019619	CTSZ	cathepsin Z [Source:HGNC Symbol;Acc:HGNC:2547]
PTK6	protein tyrosine kinase 6	enzyme	Src family	ENSCDRG00005009530	ENSCDRG00005009530	nan
TRIB3	tribbles pseudokinase 3	enzyme	Trbl family	ENSCDRG00005014958	TRIB3	tribbles pseudokinase 3 [Source:HGNC Symbol;Acc:HGNC:16228]
CSNK2A1	casein kinase 2 alpha 1	enzyme	Casein kinase 2 (CK2) family	ENSCDRG00005014111	ENSCDRG00005014111	casein kinase 2 alpha 1 [Source:NCBI gene;Acc:105100805]
MYLK2	myosin light chain kinase 2	enzyme	Myosin Light Chain Kinase (MLCK) family	ENSCDRG00005016162	MYLK2	myosin light chain kinase 2 [Source:HGNC Symbol;Acc:HGNC:16243]
PLCB4	phospholipase C beta 4	enzyme	Phosphoinositide-specific phospholipase C	ENSCDRG00005006970	PLCB4	phospholipase C beta 4 [Source:HGNC Symbol;Acc:HGNC:9059]
HCK	HCK proto-oncogene, Src family tyrosine kinase	enzyme	Src family	ENSCDRG00005016747	HCK	HCK proto-oncogene, Src family tyrosine kinase [Source:NCBI gene;Acc:105100829]
PAK5	p21 (RAC1) activated kinase 5	enzyme	PAKB subfamily	ENSCDRG00005006805	PAK5	p21 (RAC1) activated kinase 5 [Source:NCBI gene;Acc:105101260]
AHCY	adenosylhomocysteinase	enzyme	Adenosine turnover	ENSCDRG00005012422	AHCY	adenosylhomocysteinase [Source:NCBI gene;Acc:105084945]
USP14	ubiquitin specific peptidase 14	enzyme	C19: Ubiquitin-specific protease	ENSCDRG00005020182	USP14	ubiquitin specific peptidase 14 [Source:NCBI gene;Acc:105086261]
LPIN2	lipin 2	enzyme	Lipid phosphate phosphatases	ENSCDRG00005009560	LPIN2	lipin 2 [Source:HGNC Symbol;Acc:HGNC:14450]
LIPG	lipase G, endothelial type	enzyme	Hydrolases	ENSCDRG00005010970	LIPG	lipase G, endothelial type [Source:NCBI gene;Acc:105097595]
RIOK3	RIO kinase 3	enzyme	RIO3 subfamily	ENSCDRG00005019730	RIOK3	RIO kinase 3 [Source:NCBI gene;Acc:105086442]
SUV39H1	suppressor of variegation 3-9 homolog 1	enzyme	2.1.1.43 Histone methyltransferases (HMTs)	ENSCDRG00005017272	SUV39H1	suppressor of variegation 3-9 homolog 1 [Source:NCBI gene;Acc:105103308]
F9	coagulation factor IX	enzyme	S1: Chymotrypsin	ENSCDRG00005012097	F9	coagulation factor IX [Source:NCBI gene;Acc:105086028]
BMX	BMX non-receptor tyrosine kinase	enzyme	Tec family	ENSCDRG00005013111	BMX	BMX non-receptor tyrosine kinase [Source:HGNC Symbol;Acc:HGNC:1079]
PIM2	Pim-2 proto-oncogene, serine/threonine kinase	enzyme	PIM family	ENSCDRG00005017861	PIM2	Pim-2 proto-oncogene, serine/threonine kinase [Source:HGNC Symbol;Acc:HGNC:8987]
CDK16	cyclin dependent kinase 16	enzyme	TAIRE subfamily	ENSCDRG00005009201	CDK16	cyclin dependent kinase 16 [Source:NCBI gene;Acc:105101948]
PORCN	porcupine O-acyltransferase	enzyme	Membrane bound O-acyltransferases	ENSCDRG00005016745	PORCN	porcupine O-acyltransferase [Source:NCBI gene;Acc:105103314]
STK24	serine/threonine kinase 24	enzyme	YSK subfamily	ENSCDRG00005016798	STK24	serine/threonine kinase 24 [Source:HGNC Symbol;Acc:HGNC:11403]
ACOD1	aconitate decarboxylase 1	enzyme	Itaconate biosynthesis	ENSCDRG00005005145	ACOD1	aconitate decarboxylase 1 [Source:NCBI gene;Acc:105103146]
MAPK3	mitogen-activated protein kinase 3	enzyme	ERK subfamily	ENSCDRG00005008768	MAPK3	mitogen-activated protein kinase 3 [Source:HGNC Symbol;Acc:HGNC:6877]
DHODH	dihydroorotate dehydrogenase (quinone)	enzyme	1.-.-.- Oxidoreductases	ENSCDRG00005007318	DHODH	dihydroorotate dehydrogenase (quinone) [Source:NCBI gene;Acc:105088382]
MMP15	matrix metallopeptidase 15	enzyme	M10: Matrix metallopeptidase	ENSCDRG00005005433	MMP15	matrix metallopeptidase 15 [Source:HGNC Symbol;Acc:HGNC:7161]
SMPD3	sphingomyelin phosphodiesterase 3	enzyme	Sphingomyelin phosphodiesterase	ENSCDRG00005017797	SMPD3	sphingomyelin phosphodiesterase 3 [Source:HGNC Symbol;Acc:HGNC:14240]
MLYCD	malonyl-CoA decarboxylase	enzyme	Decarboxylases	ENSCDRG00005001279	MLYCD	malonyl-CoA decarboxylase [Source:NCBI gene;Acc:105089447]
EEF2K	eukaryotic elongation factor 2 kinase	enzyme	eEF2K subfamily	ENSCDRG00005021025	EEF2K	eukaryotic elongation factor 2 kinase [Source:HGNC Symbol;Acc:HGNC:24615]
HMOX2	heme oxygenase 2	enzyme	Haem oxygenase	ENSCDRG00005008500	HMOX2	heme oxygenase 2 [Source:NCBI gene;Acc:105099820]
BCKDK	branched chain keto acid dehydrogenase kinase	enzyme	Pyruvate dehydrogenase kinase (PDHK) family	ENSCDRG00005013293	BCKDK	branched chain keto acid dehydrogenase kinase [Source:NCBI gene;Acc:105102713]
KAT8	lysine acetyltransferase 8	enzyme	2.3.1.48 Histone acetyltransferases (HATs)	ENSCDRG00005013384	KAT8	lysine acetyltransferase 8 [Source:HGNC Symbol;Acc:HGNC:17933]
CSK	C-terminal Src kinase	enzyme	Csk family	ENSCDRG00005004868	CSK	C-terminal Src kinase [Source:NCBI gene;Acc:105087258]
CTSH	cathepsin H	enzyme	C1: Papain	ENSCDRG00005018410	CTSH	cathepsin H [Source:HGNC Symbol;Acc:HGNC:2535]
SGK3	serum/glucocorticoid regulated kinase family member 3	enzyme	SGK family	ENSCDRG00005020926	ENSCDRG00005020926	serum/glucocorticoid regulated kinase family member 3 [Source:HGNC Symbol;Acc:HGNC:10812]
CA2	carbonic anhydrase 2	enzyme	Carbonic anhydrases	ENSCDRG00005017485	CA2	carbonic anhydrase 2 [Source:HGNC Symbol;Acc:HGNC:1373]
RIPK2	receptor interacting serine/threonine kinase 2	enzyme	Receptor interacting protein kinase (RIPK) family	ENSCDRG00005018065	RIPK2	receptor interacting serine/threonine kinase 2 [Source:NCBI gene;Acc:105087544]
CPQ	carboxypeptidase Q	enzyme	M14: Carboxypeptidase A	ENSCDRG00005021258	CPQ	carboxypeptidase Q [Source:HGNC Symbol;Acc:HGNC:16910]
IKBKB	inhibitor of nuclear factor kappa B kinase subunit beta	enzyme	IKK family	ENSCDRG00005019600	IKBKB	inhibitor of nuclear factor kappa B kinase subunit beta [Source:HGNC Symbol;Acc:HGNC:5960]
PLAT	plasminogen activator, tissue type	enzyme	S1: Chymotrypsin	ENSCDRG00005019705	PLAT	plasminogen activator, tissue type [Source:NCBI gene;Acc:105086430]
STK3	serine/threonine kinase 3	enzyme	MST subfamily	ENSCDRG00005010463	STK3	serine/threonine kinase 3 [Source:HGNC Symbol;Acc:HGNC:11406]
SQLE	squalene epoxidase	enzyme	Lanosterol biosynthesis pathway	ENSCDRG00005004790	SQLE	squalene epoxidase [Source:NCBI gene;Acc:105096439]
GSR	glutathione-disulfide reductase	enzyme	1.-.-.- Oxidoreductases	ENSCDRG00005018652	GSR	glutathione-disulfide reductase [Source:HGNC Symbol;Acc:HGNC:4623]
ADAM2	ADAM metallopeptidase domain 2	enzyme	M12: Astacin/Adamalysin	ENSCDRG00005010441	ADAM2	ADAM metallopeptidase domain 2 [Source:HGNC Symbol;Acc:HGNC:198]
ASAH1	N-acylsphingosine amidohydrolase 1	enzyme	Acid ceramidase	ENSCDRG00005020535	ASAH1	N-acylsphingosine amidohydrolase 1 [Source:HGNC Symbol;Acc:HGNC:735]
MAP4K1	mitogen-activated protein kinase kinase kinase kinase 1	enzyme	KHS subfamily	ENSCDRG00005006911	MAP4K1	nan
DOT1L	DOT1 like histone lysine methyltransferase	enzyme	2.1.1.43 Histone methyltransferases (HMTs)	ENSCDRG00005010124	DOT1L	DOT1 like histone lysine methyltransferase [Source:HGNC Symbol;Acc:HGNC:24948]
DMPK	DM1 protein kinase	enzyme	GEK subfamily	ENSCDRG00005010303	ENSCDRG00005010303	DM1 protein kinase [Source:HGNC Symbol;Acc:HGNC:2933]
VRK3	VRK serine/threonine kinase 3	enzyme	Vaccina related kinase (VRK) family	ENSCDRG00005011211	VRK3	VRK serine/threonine kinase 3 [Source:NCBI gene;Acc:105100181]
CASP14	caspase 14	enzyme	C14: Caspase	ENSCDRG00005011978	CASP14	caspase 14 [Source:NCBI gene;Acc:105105144]
AURKC	aurora kinase C	enzyme	Aurora kinase (Aur) family	ENSCDRG00005013041	AURKC	aurora kinase C [Source:HGNC Symbol;Acc:HGNC:11391]
DYRK1B	dual specificity tyrosine phosphorylation regulated kinase 1B	enzyme	Dyrk1 subfamily	ENSCDRG00005008207	DYRK1B	dual specificity tyrosine phosphorylation regulated kinase 1B [Source:NCBI gene;Acc:105093328]
AKT2	AKT serine/threonine kinase 2	enzyme	Akt (Protein kinase B, PKB) family	ENSCDRG00005010340	AKT2	AKT serine/threonine kinase 2 [Source:HGNC Symbol;Acc:HGNC:392]
PRKD2	protein kinase D2	enzyme	Protein kinase D (PKD) family	ENSCDRG00005000229	PRKD2	protein kinase D2 [Source:HGNC Symbol;Acc:HGNC:17293]
TYK2	tyrosine kinase 2	enzyme	Janus kinase (JakA) family	ENSCDRG00005007070	TYK2	tyrosine kinase 2 [Source:HGNC Symbol;Acc:HGNC:12440]
BCAT2	branched chain amino acid transaminase 2	enzyme	2.6.1.42 Branched-chain-amino-acid transaminase	ENSCDRG00005002599	BCAT2	branched chain amino acid transaminase 2 [Source:HGNC Symbol;Acc:HGNC:977]
MAST1	microtubule associated serine/threonine kinase 1	enzyme	MAST family	ENSCDRG00005022190	MAST1	microtubule associated serine/threonine kinase 1 [Source:NCBI gene;Acc:105100753]
JAK3	Janus kinase 3	enzyme	Janus kinase (JakA) family	ENSCDRG00005013213	JAK3	Janus kinase 3 [Source:HGNC Symbol;Acc:HGNC:6193]
PIK3R2	phosphoinositide-3-kinase regulatory subunit 2	enzyme	Phosphatidylinositol kinases	ENSCDRG00005011973	ENSCDRG00005011973	nan
PDE4C	phosphodiesterase 4C	enzyme	Phosphodiesterases, 3',5'-cyclic nucleotide (PDEs)	ENSCDRG00005011492	ENSCDRG00005011492	nan
GSK3A	glycogen synthase kinase 3 alpha	enzyme	GSK subfamily	ENSCDRG00005017728	ENSCDRG00005017728	nan
CDK6	cyclin dependent kinase 6	enzyme	CDK4 subfamily	ENSCDRG00005000596	CDK6	cyclin dependent kinase 6 [Source:NCBI gene;Acc:105088747]
PIK3CG	phosphatidylinositol-4,5-bisphosphate 3-kinase catalytic subunit gamma	enzyme	Phosphatidylinositol-4,5-bisphosphate 3-kinase family	ENSCDRG00005007700	PIK3CG	phosphatidylinositol-4,5-bisphosphate 3-kinase catalytic subunit gamma [Source:HGNC Symbol;Acc:HGNC:8978]
PON3	paraoxonase 3	enzyme	Paraoxonase (PON) family	ENSCDRG00005002624	PON3	paraoxonase 3 [Source:NCBI gene;Acc:105088725]
PON2	paraoxonase 2	enzyme	Paraoxonase (PON) family	ENSCDRG00005002647	PON2	paraoxonase 2 [Source:NCBI gene;Acc:105088724]
CPVL	carboxypeptidase vitellogenic like	enzyme	S10: Carboxypeptidase Y	ENSCDRG00005001591	CPVL	carboxypeptidase vitellogenic like [Source:HGNC Symbol;Acc:HGNC:14399]
CASP2	caspase 2	enzyme	C14: Caspase	ENSCDRG00005007066	CASP2	caspase 2 [Source:NCBI gene;Acc:105105559]
CYP3A5	cytochrome P450 family 3 subfamily A member 5	enzyme	CYP3 family	ENSCDRG00005010591	ENSCDRG00005010591	nan
IMPDH1	inosine monophosphate dehydrogenase 1	enzyme	1.-.-.- Oxidoreductases	ENSCDRG00005006025	IMPDH1	inosine monophosphate dehydrogenase 1 [Source:HGNC Symbol;Acc:HGNC:6052]
EZH2	enhancer of zeste 2 polycomb repressive complex 2 subunit	enzyme	2.1.1.43 Histone methyltransferases (HMTs)	ENSCDRG00005009728	EZH2	enhancer of zeste 2 polycomb repressive complex 2 subunit [Source:NCBI gene;Acc:105085196]
PRKAG2	protein kinase AMP-activated non-catalytic subunit gamma 2	enzyme	AMPK subfamily	ENSCDRG00005012173	PRKAG2	protein kinase AMP-activated non-catalytic subunit gamma 2 [Source:HGNC Symbol;Acc:HGNC:9386]
AEBP1	AE binding protein 1	enzyme	M14: Carboxypeptidase A	ENSCDRG00005010388	AEBP1	AE binding protein 1 [Source:HGNC Symbol;Acc:HGNC:303]
GCK	glucokinase	enzyme	Hexokinases	ENSCDRG00005009900	GCK	glucokinase [Source:HGNC Symbol;Acc:HGNC:4195]
LIMK1	LIM domain kinase 1	enzyme	LIMK subfamily	ENSCDRG00005018812	LIMK1	LIM domain kinase 1 [Source:HGNC Symbol;Acc:HGNC:6613]
KDM4C	lysine demethylase 4C	enzyme	1.14.11.- Histone demethylases	ENSCDRG00005005441	KDM4C	lysine demethylase 4C [Source:HGNC Symbol;Acc:HGNC:17071]
TESK1	testis associated actin remodelling kinase 1	enzyme	TESK subfamily	ENSCDRG00005005553	TESK1	testis associated actin remodelling kinase 1 [Source:HGNC Symbol;Acc:HGNC:11731]
CA9	carbonic anhydrase 9	enzyme	Carbonic anhydrases	ENSCDRG00005005379	CA9	carbonic anhydrase 9 [Source:HGNC Symbol;Acc:HGNC:1383]
PIP5K1B	phosphatidylinositol-4-phosphate 5-kinase type 1 beta	enzyme	Phosphatidylinositol phosphate kinases	ENSCDRG00005002534	PIP5K1B	phosphatidylinositol-4-phosphate 5-kinase type 1 beta [Source:NCBI gene;Acc:105105952]
PTGDS	prostaglandin D2 synthase	enzyme	Prostaglandin synthases	ENSCDRG00005022274	ENSCDRG00005022274	prostaglandin D2 synthase [Source:NCBI gene;Acc:105106194]
MAPK8	mitogen-activated protein kinase 8	enzyme	JNK subfamily	ENSCDRG00005014970	MAPK8	mitogen-activated protein kinase 8 [Source:NCBI gene;Acc:105094659]
TNKS2	tankyrase 2	enzyme	Poly ADP-ribose polymerases	ENSCDRG00005016655	TNKS2	tankyrase 2 [Source:HGNC Symbol;Acc:HGNC:15677]
MAP3K8	mitogen-activated protein kinase kinase kinase 8	enzyme	STE-unique family	ENSCDRG00005010773	MAP3K8	mitogen-activated protein kinase kinase kinase 8 [Source:HGNC Symbol;Acc:HGNC:6860]
XPNPEP1	X-prolyl aminopeptidase 1	enzyme	M24: Methionyl aminopeptidase	ENSCDRG00005006270	XPNPEP1	X-prolyl aminopeptidase 1 [Source:HGNC Symbol;Acc:HGNC:12822]
RPS6KB1	ribosomal protein S6 kinase B1	enzyme	p70 subfamily	ENSCDRG00005005247	RPS6KB1	ribosomal protein S6 kinase B1 [Source:NCBI gene;Acc:105097829]
CPD	carboxypeptidase D	enzyme	M14: Carboxypeptidase A	ENSCDRG00005015369	CPD	carboxypeptidase D [Source:HGNC Symbol;Acc:HGNC:2301]
KAT2A	lysine acetyltransferase 2A	enzyme	2.3.1.48 Histone acetyltransferases (HATs)	ENSCDRG00005004433	KAT2A	lysine acetyltransferase 2A [Source:HGNC Symbol;Acc:HGNC:4201]
EZH1	enhancer of zeste 1 polycomb repressive complex 2 subunit	enzyme	2.1.1.43 Histone methyltransferases (HMTs)	ENSCDRG00005006165	EZH1	enhancer of zeste 1 polycomb repressive complex 2 subunit [Source:NCBI gene;Acc:105090473]
ALOX12	arachidonate 12-lipoxygenase, 12S type	enzyme	Lipoxygenases	ENSCDRG00005017973	ALOX12	arachidonate 12-lipoxygenase, 12S type [Source:HGNC Symbol;Acc:HGNC:429]
HDAC5	histone deacetylase 5	enzyme	3.5.1.- Histone deacetylases (HDACs)	ENSCDRG00005013881	HDAC5	histone deacetylase 5 [Source:HGNC Symbol;Acc:HGNC:14068]
PRKAR1A	protein kinase cAMP-dependent type I regulatory subunit alpha	enzyme	Protein kinase A (PKA) family	ENSCDRG00005020041	PRKAR1A	protein kinase cAMP-dependent type I regulatory subunit alpha [Source:NCBI gene;Acc:105085703]
MAP2K6	mitogen-activated protein kinase kinase 6	enzyme	STE7 family	ENSCDRG00005003593	MAP2K6	mitogen-activated protein kinase kinase 6 [Source:HGNC Symbol;Acc:HGNC:6846]
MAPK10	mitogen-activated protein kinase 10	enzyme	JNK subfamily	ENSCDRG00005005394	MAPK10	mitogen-activated protein kinase 10 [Source:HGNC Symbol;Acc:HGNC:6872]
INPP4B	inositol polyphosphate-4-phosphatase type II B	enzyme	Inositol polyphosphate phosphatases	ENSCDRG00005000441	INPP4B	inositol polyphosphate-4-phosphatase type II B [Source:HGNC Symbol;Acc:HGNC:6075]
CPE	carboxypeptidase E	enzyme	M14: Carboxypeptidase A	ENSCDRG00005011907	CPE	carboxypeptidase E [Source:NCBI gene;Acc:105089282]
CPZ	carboxypeptidase Z	enzyme	M14: Carboxypeptidase A	ENSCDRG00005002249	CPZ	carboxypeptidase Z [Source:NCBI gene;Acc:105103340]
CTSC	cathepsin C	enzyme	C1: Papain	ENSCDRG00005009321	CTSC	cathepsin C [Source:HGNC Symbol;Acc:HGNC:2528]
KMT5B	lysine methyltransferase 5B	enzyme	2.1.1.43 Histone methyltransferases (HMTs)	ENSCDRG00005008575	KMT5B	lysine methyltransferase 5B [Source:NCBI gene;Acc:105104405]
HIPK3	homeodomain interacting protein kinase 3	enzyme	HIPK subfamily	ENSCDRG00005018642	HIPK3	homeodomain interacting protein kinase 3 [Source:HGNC Symbol;Acc:HGNC:4915]
MVK	mevalonate kinase	enzyme	Lanosterol biosynthesis pathway	ENSCDRG00005011437	MVK	mevalonate kinase [Source:HGNC Symbol;Acc:HGNC:7530]
CAMKK2	calcium/calmodulin dependent protein kinase kinase 2	enzyme	Meta subfamily	ENSCDRG00005016978	CAMKK2	calcium/calmodulin dependent protein kinase kinase 2 [Source:HGNC Symbol;Acc:HGNC:1470]
PTGES3	prostaglandin E synthase 3	enzyme	Prostaglandin synthases	ENSCDRG00005008722	PTGES3	prostaglandin E synthase 3 [Source:HGNC Symbol;Acc:HGNC:16049]
CYP27B1	cytochrome P450 family 27 subfamily B member 1	enzyme	CYP24, CYP26 and CYP27 families	ENSCDRG00005019909	CYP27B1	25-hydroxyvitamin D-1 alpha hydroxylase, mitochondrial [Source:NCBI gene;Acc:105100328]
METAP2	methionyl aminopeptidase 2	enzyme	M24: Methionyl aminopeptidase	ENSCDRG00005020004	METAP2	methionyl aminopeptidase 2 [Source:NCBI gene;Acc:105097425]
LTA4H	leukotriene A4 hydrolase	enzyme	Hydrolases	ENSCDRG00005019737	LTA4H	leukotriene A4 hydrolase [Source:NCBI gene;Acc:105097432]
PRMT8	protein arginine methyltransferase 8	enzyme	2.1.1.- Protein arginine N-methyltransferases	ENSCDRG00005022419	PRMT8	protein arginine methyltransferase 8 [Source:HGNC Symbol;Acc:HGNC:5188]
ALDH2	aldehyde dehydrogenase 2 family member	enzyme	1.-.-.- Oxidoreductases	ENSCDRG00005005643	ENSCDRG00005005643	nan
USP5	ubiquitin specific peptidase 5	enzyme	C19: Ubiquitin-specific protease	ENSCDRG00005019114	USP5	ubiquitin specific peptidase 5 [Source:NCBI gene;Acc:105098201]
PRKAB1	protein kinase AMP-activated non-catalytic subunit beta 1	enzyme	AMPK subfamily	ENSCDRG00005017280	PRKAB1	protein kinase AMP-activated non-catalytic subunit beta 1 [Source:NCBI gene;Acc:105104898]
FRK	fyn related Src family tyrosine kinase	enzyme	Src family	ENSCDRG00005003143	FRK	fyn related Src family tyrosine kinase [Source:NCBI gene;Acc:105088367]
MAK	male germ cell associated kinase	enzyme	RCK family	ENSCDRG00005012566	MAK	male germ cell associated kinase [Source:NCBI gene;Acc:105101783]
MAPK14	mitogen-activated protein kinase 14	enzyme	p38 subfamily	ENSCDRG00005010666	MAPK14	mitogen-activated protein kinase 14 [Source:NCBI gene;Acc:105101338]
STK38	serine/threonine kinase 38	enzyme	NDR family	ENSCDRG00005011917	STK38	serine/threonine kinase 38 [Source:NCBI gene;Acc:105101333]
CILK1	ciliogenesis associated kinase 1	enzyme	RCK family	ENSCDRG00005012148	CILK1	intestinal cell kinase [Source:HGNC Symbol;Acc:HGNC:21219]
ALDH5A1	aldehyde dehydrogenase 5 family member A1	enzyme	GABA turnover	ENSCDRG00005018841	ALDH5A1	aldehyde dehydrogenase 5 family member A1 [Source:NCBI gene;Acc:105089130]
VNN1	vanin 1	enzyme	Hydrolases	ENSCDRG00005021738	VNN1	vanin 1 [Source:NCBI gene;Acc:105096352]
TRIM38	tripartite motif containing 38	enzyme	2.3.2.27 RING-type E3 ubiquitin transferase	ENSCDRG00005003486	TRIM38	tripartite motif containing 38 [Source:NCBI gene;Acc:105089147]
PDE10A	phosphodiesterase 10A	enzyme	Phosphodiesterases, 3',5'-cyclic nucleotide (PDEs)	ENSCDRG00005009275	PDE10A	phosphodiesterase 10A [Source:NCBI gene;Acc:105086282]
SENP6	SUMO specific peptidase 6	enzyme	C48: Ulp1 endopeptidase	ENSCDRG00005020561	SENP6	SUMO specific peptidase 6 [Source:NCBI gene;Acc:105104945]
PRPF4B	pre-mRNA processing factor 4B	enzyme	PRP4 subfamily	ENSCDRG00005015684	PRPF4B	pre-mRNA processing factor 4B [Source:HGNC Symbol;Acc:HGNC:17346]
TTK	TTK protein kinase	enzyme	TTK family	ENSCDRG00005006825	TTK	TTK protein kinase [Source:NCBI gene;Acc:105103948]
HMGCS1	3-hydroxy-3-methylglutaryl-CoA synthase 1	enzyme	Lanosterol biosynthesis pathway	ENSCDRG00005014801	HMGCS1	3-hydroxy-3-methylglutaryl-CoA synthase 1 [Source:NCBI gene;Acc:105107063]
BRD8	bromodomain containing 8	enzyme	Bromodomain kinase (BRDK) family	ENSCDRG00005001489	BRD8	bromodomain-containing protein 8-like [Source:NCBI gene;Acc:105090610]
LOX	lysyl oxidase	enzyme	1.4.3.13 Lysyl oxidases	ENSCDRG00005004961	LOX	lysyl oxidase [Source:HGNC Symbol;Acc:HGNC:6664]
GZMK	granzyme K	enzyme	S1: Chymotrypsin	ENSCDRG00005010472	GZMK	granzyme K [Source:NCBI gene;Acc:105087150]
HMGCR	3-hydroxy-3-methylglutaryl-CoA reductase	enzyme	Lanosterol biosynthesis pathway	ENSCDRG00005002491	HMGCR	3-hydroxy-3-methylglutaryl-CoA reductase [Source:HGNC Symbol;Acc:HGNC:5006]
PDE8B	phosphodiesterase 8B	enzyme	Phosphodiesterases, 3',5'-cyclic nucleotide (PDEs)	ENSCDRG00005000565	ENSCDRG00005000565	nan
CLK4	CDC like kinase 4	enzyme	CLK family	ENSCDRG00005007120	CLK4	CDC like kinase 4 [Source:NCBI gene;Acc:105099609]
ITK	IL2 inducible T cell kinase	enzyme	Tec family	ENSCDRG00005000713	ITK	IL2 inducible T cell kinase [Source:NCBI gene;Acc:105095141]
LNPEP	leucyl and cystinyl aminopeptidase	enzyme	M1: Aminopeptidase N	ENSCDRG00005008715	LNPEP	leucyl and cystinyl aminopeptidase [Source:NCBI gene;Acc:105100897]
PDE4D	phosphodiesterase 4D	enzyme	Phosphodiesterases, 3',5'-cyclic nucleotide (PDEs)	ENSCDRG00005005353	PDE4D	phosphodiesterase 4D [Source:HGNC Symbol;Acc:HGNC:8783]
CSNK1A1	casein kinase 1 alpha 1	enzyme	Casein kinase 1 (CK1) family	ENSCDRG00005010428	ENSCDRG00005010428	nan
CRBN	cereblon	enzyme	E3 ubiquitin ligase components	ENSCDRG00005006474	CRBN	cereblon [Source:HGNC Symbol;Acc:HGNC:30185]
OGG1	8-oxoguanine DNA glycosylase	enzyme	DNA glycosylases	ENSCDRG00005011148	OGG1	8-oxoguanine DNA glycosylase [Source:NCBI gene;Acc:105093137]
PCCB	propionyl-CoA carboxylase subunit beta	enzyme	Carboxylases	ENSCDRG00005013666	PCCB	propionyl-CoA carboxylase subunit beta [Source:HGNC Symbol;Acc:HGNC:8654]
GRK7	G protein-coupled receptor kinase 7	enzyme	Opsin/rhodopsin kinases	ENSCDRG00005009268	GRK7	G protein-coupled receptor kinase 7 [Source:HGNC Symbol;Acc:HGNC:17031]
KAT2B	lysine acetyltransferase 2B	enzyme	2.3.1.48 Histone acetyltransferases (HATs)	ENSCDRG00005002364	KAT2B	lysine acetyltransferase 2B [Source:HGNC Symbol;Acc:HGNC:8638]
BCHE	butyrylcholinesterase	enzyme	Acetylcholine turnover	ENSCDRG00005003673	BCHE	butyrylcholinesterase [Source:HGNC Symbol;Acc:HGNC:983]
PRKAR2A	protein kinase cAMP-dependent type II regulatory subunit alpha	enzyme	Protein kinase A (PKA) family	ENSCDRG00005003620	PRKAR2A	solute carrier family 25 member 20 [Source:NCBI gene;Acc:105087874]
NEK11	NIMA related kinase 11	enzyme	NIMA (never in mitosis gene a)- related kinase (NEK) family	ENSCDRG00005000023	NEK11	NIMA related kinase 11 [Source:NCBI gene;Acc:105088765]
MAPKAPK3	MAPK activated protein kinase 3	enzyme	MAPKAPK subfamily	ENSCDRG00005010652	MAPKAPK3	MAPK activated protein kinase 3 [Source:NCBI gene;Acc:105087288]
PLCH1	phospholipase C eta 1	enzyme	Phosphoinositide-specific phospholipase C	ENSCDRG00005000373	PLCH1	phospholipase C eta 1 [Source:HGNC Symbol;Acc:HGNC:29185]
NEK4	NIMA related kinase 4	enzyme	NIMA (never in mitosis gene a)- related kinase (NEK) family	ENSCDRG00005011296	NEK4	NIMA related kinase 4 [Source:HGNC Symbol;Acc:HGNC:11399]
ADAM23	ADAM metallopeptidase domain 23	enzyme	M12: Astacin/Adamalysin	ENSCDRG00005016801	ADAM23	ADAM metallopeptidase domain 23 [Source:HGNC Symbol;Acc:HGNC:202]
PIKFYVE	phosphoinositide kinase, FYVE-type zinc finger containing	enzyme	1-phosphatidylinositol-3-phosphate 5-kinase family	ENSCDRG00005014910	PIKFYVE	phosphoinositide kinase, FYVE-type zinc finger containing [Source:NCBI gene;Acc:105093550]
ZAP70	zeta chain of T cell receptor associated protein kinase 70	enzyme	Syk family	ENSCDRG00005018964	ZAP70	zeta chain of T cell receptor associated protein kinase 70 [Source:HGNC Symbol;Acc:HGNC:12858]
NRBP1	nuclear receptor binding protein 1	enzyme	NRBP family	ENSCDRG00005009298	NRBP1	nuclear receptor binding protein 1 [Source:NCBI gene;Acc:105098548]
PSMD14	proteasome 26S subunit, non-ATPase 14	enzyme	M67: PSMD14 peptidase	ENSCDRG00005003019	PSMD14	proteasome 26S subunit, non-ATPase 14 [Source:NCBI gene;Acc:105093692]
PDE1A	phosphodiesterase 1A	enzyme	Phosphodiesterases, 3',5'-cyclic nucleotide (PDEs)	ENSCDRG00005006588	PDE1A	phosphodiesterase 1A [Source:HGNC Symbol;Acc:HGNC:8774]
PCSK4	proprotein convertase subtilisin/kexin type 4	enzyme	S8: Subtilisin	ENSCDRG00005010737	PCSK4	proprotein convertase subtilisin/kexin type 4 [Source:HGNC Symbol;Acc:HGNC:8746]
GLS	glutaminase	enzyme	3.5.1.2 Glutaminases	ENSCDRG00005015244	GLS	glutaminase [Source:HGNC Symbol;Acc:HGNC:4331]
GGCX	gamma-glutamyl carboxylase	enzyme	Carboxylases	ENSCDRG00005016233	GGCX	gamma-glutamyl carboxylase [Source:HGNC Symbol;Acc:HGNC:4247]
KDM3A	lysine demethylase 3A	enzyme	1.14.11.- Histone demethylases	ENSCDRG00005013998	KDM3A	lysine demethylase 3A [Source:NCBI gene;Acc:105104170]
PLCD4	phospholipase C delta 4	enzyme	Phosphoinositide-specific phospholipase C	ENSCDRG00005018172	PLCD4	phospholipase C delta 4 [Source:NCBI gene;Acc:105096083]
PRKAG3	protein kinase AMP-activated non-catalytic subunit gamma 3	enzyme	AMPK subfamily	ENSCDRG00005000055	PRKAG3	protein kinase AMP-activated non-catalytic subunit gamma 3 [Source:NCBI gene;Acc:105096091]
STK16	serine/threonine kinase 16	enzyme	NAK family	ENSCDRG00005000710	STK16	serine/threonine kinase 16 [Source:NCBI gene;Acc:105096108]
PASK	PAS domain containing serine/threonine kinase	enzyme	PASK subfamily	ENSCDRG00005021771	PASK	PAS domain containing serine/threonine kinase [Source:HGNC Symbol;Acc:HGNC:17270]
STK25	serine/threonine kinase 25	enzyme	YSK subfamily	ENSCDRG00005000090	STK25	serine/threonine kinase 25 [Source:HGNC Symbol;Acc:HGNC:11404]
TPO	thyroid peroxidase	enzyme	Thyroid hormone turnover	ENSCDRG00005013721	TPO	thyroid peroxidase [Source:HGNC Symbol;Acc:HGNC:12015]
PROC	protein C, inactivator of coagulation factors Va and VIIIa	enzyme	S1: Chymotrypsin	ENSCDRG00005004287	PROC	protein C, inactivator of coagulation factors Va and VIIIa [Source:HGNC Symbol;Acc:HGNC:9451]
ODC1	ornithine decarboxylase 1	enzyme	Decarboxylases	ENSCDRG00005021445	ODC1	ornithine decarboxylase 1 [Source:HGNC Symbol;Acc:HGNC:8109]
PRKD3	protein kinase D3	enzyme	Protein kinase D (PKD) family	ENSCDRG00005017670	PRKD3	protein kinase D3 [Source:NCBI gene;Acc:105103635]
QPCT	glutaminyl-peptide cyclotransferase	enzyme	M28: Aminopeptidase Y	ENSCDRG00005017715	QPCT	glutaminyl-peptide cyclotransferase [Source:NCBI gene;Acc:105103638]
AAK1	AP2 associated kinase 1	enzyme	NAK family	ENSCDRG00005008926	AAK1	AP2 associated kinase 1 [Source:HGNC Symbol;Acc:HGNC:19679]
SPR	sepiapterin reductase	enzyme	1.-.-.- Oxidoreductases	ENSCDRG00005018514	SPR	sepiapterin reductase [Source:NCBI gene;Acc:105101465]
MARK1	microtubule affinity regulating kinase 1	enzyme	MARK subfamily	ENSCDRG00005018133	MARK1	microtubule affinity regulating kinase 1 [Source:HGNC Symbol;Acc:HGNC:6896]
HDAC1	histone deacetylase 1	enzyme	3.5.1.- Histone deacetylases (HDACs)	ENSCDRG00005020541	HDAC1	histone deacetylase 1 [Source:NCBI gene;Acc:105085792]
ASH1L	ASH1 like histone lysine methyltransferase	enzyme	2.1.1.43 Histone methyltransferases (HMTs)	ENSCDRG00005008672	ASH1L	ASH1 like histone lysine methyltransferase [Source:NCBI gene;Acc:105088782]
MFN2	mitofusin 2	enzyme	Mitofusin proteins	ENSCDRG00005017822	MFN2	mitofusin 2 [Source:NCBI gene;Acc:105107041]
PLA2G4A	phospholipase A2 group IVA	enzyme	Phospholipase A<sub>2</sub>	ENSCDRG00005016646	PLA2G4A	phospholipase A2 group IVA [Source:NCBI gene;Acc:105099290]
PRDM2	PR/SET domain 2	enzyme	2.1.1.43 Histone methyltransferases (HMTs)	ENSCDRG00005019238	PRDM2	PR/SET domain 2 [Source:HGNC Symbol;Acc:HGNC:9347]
CTH	cystathionine gamma-lyase	enzyme	Hydrogen sulphide synthesis	ENSCDRG00005009028	CTH	cystathionine gamma-lyase [Source:NCBI gene;Acc:105096636]
TNNI3K	TNNI3 interacting kinase	enzyme	HH498 subfamily	ENSCDRG00005010113	ENSCDRG00005010113	serine/threonine-protein kinase TNNI3K [Source:NCBI gene;Acc:105096644]
NT5C1A	5'-nucleotidase, cytosolic IA	enzyme	Adenosine turnover	ENSCDRG00005012419	NT5C1A	5'-nucleotidase, cytosolic IA [Source:NCBI gene;Acc:105103361]
MTR	5-methyltetrahydrofolate-homocysteine methyltransferase	enzyme	Methionine turnover	ENSCDRG00005009139	MTR	5-methyltetrahydrofolate-homocysteine methyltransferase [Source:HGNC Symbol;Acc:HGNC:7468]
KMO	kynurenine 3-monooxygenase	enzyme	1.14.13.9 Kynurenine 3-monooxygenase	ENSCDRG00005014408	KMO	kynurenine 3-monooxygenase [Source:NCBI gene;Acc:105099274]
AKT3	AKT serine/threonine kinase 3	enzyme	Akt (Protein kinase B, PKB) family	ENSCDRG00005013167	ENSCDRG00005013167	AKT serine/threonine kinase 3 [Source:NCBI gene;Acc:105099264]
KDM5B	lysine demethylase 5B	enzyme	1.14.11.- Histone demethylases	ENSCDRG00005019703	KDM5B	lysine demethylase 5B [Source:NCBI gene;Acc:105105928]
PLA2G2D	phospholipase A2 group IID	enzyme	Phospholipase A<sub>2</sub>	ENSCDRG00005008427	PLA2G2D	phospholipase A2 group IID [Source:NCBI gene;Acc:105088847]
CDK18	cyclin dependent kinase 18	enzyme	TAIRE subfamily	ENSCDRG00005012275	CDK18	cyclin dependent kinase 18 [Source:HGNC Symbol;Acc:HGNC:8751]
ECE1	endothelin converting enzyme 1	enzyme	M13: Neprilysin	ENSCDRG00005011473	ECE1	endothelin converting enzyme 1 [Source:NCBI gene;Acc:105088862]
PIK3R3	phosphoinositide-3-kinase regulatory subunit 3	enzyme	Phosphatidylinositol kinases	ENSCDRG00005018616	ENSCDRG00005018616	phosphoinositide-3-kinase regulatory subunit 3 [Source:NCBI gene;Acc:105092913]
FAAH	fatty acid amide hydrolase	enzyme	Hydrolases	ENSCDRG00005019005	FAAH	fatty-acid amide hydrolase 1 [Source:NCBI gene;Acc:105092923]
HSD11B1	hydroxysteroid 11-beta dehydrogenase 1	enzyme	1.-.-.- Oxidoreductases	ENSCDRG00005006991	HSD11B1	hydroxysteroid 11-beta dehydrogenase 1 [Source:NCBI gene;Acc:105099329]
NEK2	NIMA related kinase 2	enzyme	NIMA (never in mitosis gene a)- related kinase (NEK) family	ENSCDRG00005018887	NEK2	NIMA related kinase 2 [Source:HGNC Symbol;Acc:HGNC:7745]
RPS6KA1	ribosomal protein S6 kinase A1	enzyme	RSK subfamily	ENSCDRG00005006116	RPS6KA1	ribosomal protein S6 kinase A1 [Source:HGNC Symbol;Acc:HGNC:10430]
CTSD	cathepsin D	enzyme	A1: Pepsin	ENSCDRG00005020893	CTSD	cathepsin D [Source:HGNC Symbol;Acc:HGNC:2529]
STK11	serine/threonine kinase 11	enzyme	LKB subfamily	ENSCDRG00005012564	STK11	serine/threonine kinase 11 [Source:NCBI gene;Acc:105104114]
KMT2A	lysine methyltransferase 2A	enzyme	2.1.1.43 Histone methyltransferases (HMTs)	ENSCDRG00005020014	ENSCDRG00005020014	lysine methyltransferase 2A [Source:NCBI gene;Acc:105090168]
MMP8	matrix metallopeptidase 8	enzyme	M10: Matrix metallopeptidase	ENSCDRG00005001367	MMP8	matrix metallopeptidase 8 [Source:NCBI gene;Acc:105087170]
CA14	carbonic anhydrase 14	enzyme	Carbonic anhydrases	ENSCDRG00005016386	CA14	carbonic anhydrase 14 [Source:NCBI gene;Acc:105103176]
SGK1	serum/glucocorticoid regulated kinase 1	enzyme	SGK family	ENSCDRG00005021488	SGK1	serum/glucocorticoid regulated kinase 1 [Source:NCBI gene;Acc:105096363]
ARG1	arginase 1	enzyme	Arginase	ENSCDRG00005021864	ARG1	arginase 1 [Source:HGNC Symbol;Acc:HGNC:663]
UCHL3	ubiquitin C-terminal hydrolase L3	enzyme	C12: Ubiquitin C-terminal hydrolase	ENSCDRG00005004566	UCHL3	ubiquitin C-terminal hydrolase L3 [Source:NCBI gene;Acc:105101769]
NEK6	NIMA related kinase 6	enzyme	NIMA (never in mitosis gene a)- related kinase (NEK) family	ENSCDRG00005006640	NEK6	NIMA related kinase 6 [Source:NCBI gene;Acc:105092637]
KDSR	3-ketodihydrosphingosine reductase	enzyme	3-ketodihydrosphingosine reductase	ENSCDRG00005016212	KDSR	3-ketodihydrosphingosine reductase [Source:NCBI gene;Acc:105089001]
NEK9	NIMA related kinase 9	enzyme	NIMA (never in mitosis gene a)- related kinase (NEK) family	ENSCDRG00005001099	NEK9	NIMA related kinase 9 [Source:HGNC Symbol;Acc:HGNC:18591]
DNMT3A	DNA methyltransferase 3 alpha	enzyme	2.1.1.- Methyltransferases	ENSCDRG00005010068	DNMT3A	DNA methyltransferase 3 alpha [Source:HGNC Symbol;Acc:HGNC:2978]
ATAD2B	ATPase family AAA domain containing 2B	enzyme	3.6.1.3 ATPases	ENSCDRG00005007580	ATAD2B	ATPase family AAA domain containing 2B [Source:HGNC Symbol;Acc:HGNC:29230]
IDE	insulin degrading enzyme	enzyme	M16: Pitrilysin	ENSCDRG00005015873	IDE	insulin degrading enzyme [Source:NCBI gene;Acc:105084233]
CPN1	carboxypeptidase N subunit 1	enzyme	M14: Carboxypeptidase A	ENSCDRG00005003276	CPN1	carboxypeptidase N subunit 1 [Source:NCBI gene;Acc:105084312]
ACAT2	acetyl-CoA acetyltransferase 2	enzyme	Lanosterol biosynthesis pathway	ENSCDRG00005015012	ACAT2	acetyl-CoA acetyltransferase 2 [Source:NCBI gene;Acc:105101767]
MASTL	microtubule associated serine/threonine kinase like	enzyme	MAST family	ENSCDRG00005011932	MASTL	microtubule associated serine/threonine kinase like [Source:NCBI gene;Acc:105102336]
KDM3B	lysine demethylase 3B	enzyme	1.14.11.- Histone demethylases	ENSCDRG00005001054	KDM3B	lysine demethylase 3B [Source:NCBI gene;Acc:105091085]
PTK2B	protein tyrosine kinase 2 beta	enzyme	Fak family	ENSCDRG00005019294	PTK2B	protein tyrosine kinase 2 beta [Source:NCBI gene;Acc:105102240]
EPHX2	epoxide hydrolase 2	enzyme	Hydrolases	ENSCDRG00005019465	EPHX2	epoxide hydrolase 2 [Source:NCBI gene;Acc:105102229]
SCPEP1	serine carboxypeptidase 1	enzyme	S10: Carboxypeptidase Y	ENSCDRG00005022141	SCPEP1	serine carboxypeptidase 1 [Source:NCBI gene;Acc:105097792]
TEX14	testis expressed 14, intercellular bridge forming factor	enzyme	NKF5 family	ENSCDRG00005022201	TEX14	testis expressed 14, intercellular bridge forming factor [Source:HGNC Symbol;Acc:HGNC:11737]
ADCY7	adenylate cyclase 7	enzyme	Adenylyl cyclases (ACs)	ENSCDRG00005000750	ADCY7	adenylate cyclase 7 [Source:HGNC Symbol;Acc:HGNC:238]
CAT	catalase	enzyme	1.-.-.- Oxidoreductases	ENSCDRG00005017656	CAT	catalase [Source:NCBI gene;Acc:105106806]
PIK3CA	phosphatidylinositol-4,5-bisphosphate 3-kinase catalytic subunit alpha	enzyme	Phosphatidylinositol-4,5-bisphosphate 3-kinase family	ENSCDRG00005000192	PIK3CA	phosphatidylinositol-4,5-bisphosphate 3-kinase catalytic subunit alpha [Source:HGNC Symbol;Acc:HGNC:8975]
CPXM2	carboxypeptidase X, M14 family member 2	enzyme	M14: Carboxypeptidase A	ENSCDRG00005006920	CPXM2	carboxypeptidase X, M14 family member 2 [Source:HGNC Symbol;Acc:HGNC:26977]
XPNPEP2	X-prolyl aminopeptidase 2	enzyme	M24: Methionyl aminopeptidase	ENSCDRG00005008101	XPNPEP2	X-prolyl aminopeptidase 2 [Source:NCBI gene;Acc:105098824]
OCRL	OCRL inositol polyphosphate-5-phosphatase	enzyme	Inositol polyphosphate phosphatases	ENSCDRG00005007667	OCRL	OCRL inositol polyphosphate-5-phosphatase [Source:HGNC Symbol;Acc:HGNC:8108]
PLG	plasminogen	enzyme	S1: Chymotrypsin	ENSCDRG00005013803	PLG	plasminogen [Source:HGNC Symbol;Acc:HGNC:9071]
NT5C3A	5'-nucleotidase, cytosolic IIIA	enzyme	Adenosine turnover	ENSCDRG00005003264	NT5C3A	5'-nucleotidase, cytosolic IIIA [Source:NCBI gene;Acc:105095862]
TAF1L	TATA-box binding protein associated factor 1 like	enzyme	TAF1 family	ENSCDRG00005017651	ENSCDRG00005017651	nan
TRIM24	tripartite motif containing 24	enzyme	TIF1 family	ENSCDRG00005002494	TRIM24	tripartite motif containing 24 [Source:HGNC Symbol;Acc:HGNC:11812]
PLAU	plasminogen activator, urokinase	enzyme	S1: Chymotrypsin	ENSCDRG00005017463	PLAU	plasminogen activator, urokinase [Source:NCBI gene;Acc:105092451]
CIT	citron rho-interacting serine/threonine kinase	enzyme	Other DMPK family kinases	ENSCDRG00005017393	CIT	citron rho-interacting serine/threonine kinase [Source:HGNC Symbol;Acc:HGNC:1985]
PKN1	protein kinase N1	enzyme	Protein kinase N (PKN) family	ENSCDRG00005014465	PKN1	protein kinase N1 [Source:HGNC Symbol;Acc:HGNC:9405]
MMP19	matrix metallopeptidase 19	enzyme	M10: Matrix metallopeptidase	ENSCDRG00005004332	MMP19	matrix metallopeptidase 19 [Source:HGNC Symbol;Acc:HGNC:7165]
PDE1B	phosphodiesterase 1B	enzyme	Phosphodiesterases, 3',5'-cyclic nucleotide (PDEs)	ENSCDRG00005010791	PDE1B	phosphodiesterase 1B [Source:NCBI gene;Acc:105100999]
CDK2	cyclin dependent kinase 2	enzyme	CDK1 subfamily	ENSCDRG00005004824	CDK2	cyclin dependent kinase 2 [Source:NCBI gene;Acc:105086385]
DBH	dopamine beta-hydroxylase	enzyme	Catecholamine turnover	ENSCDRG00005000427	DBH	dopamine beta-hydroxylase [Source:HGNC Symbol;Acc:HGNC:2689]
AMD1	adenosylmethionine decarboxylase 1	enzyme	Decarboxylases	ENSCDRG00005004169	AMD1	adenosylmethionine decarboxylase 1 [Source:HGNC Symbol;Acc:HGNC:457]
NRK	Nik related kinase	enzyme	MSN subfamily	ENSCDRG00005006254	NRK	Nik related kinase [Source:HGNC Symbol;Acc:HGNC:25391]
PLA2G12A	phospholipase A2 group XIIA	enzyme	Phospholipase A<sub>2</sub>	ENSCDRG00005009961	PLA2G12A	phospholipase A2 group XIIA [Source:NCBI gene;Acc:105089899]
COQ8B	coenzyme Q8B	enzyme	ABC1-B subfamily	ENSCDRG00005012960	COQ8B	coenzyme Q8B [Source:HGNC Symbol;Acc:HGNC:19041]
DNPEP	aspartyl aminopeptidase	enzyme	M18: Aminopeptidase I	ENSCDRG00005001108	DNPEP	aspartyl aminopeptidase [Source:NCBI gene;Acc:105096113]
NCOA3	nuclear receptor coactivator 3	enzyme	2.3.1.48 Histone acetyltransferases (HATs)	ENSCDRG00005011940	NCOA3	nuclear receptor coactivator 3 [Source:HGNC Symbol;Acc:HGNC:7670]
PLCG1	phospholipase C gamma 1	enzyme	Phosphoinositide-specific phospholipase C	ENSCDRG00005009801	PLCG1	phospholipase C gamma 1 [Source:HGNC Symbol;Acc:HGNC:9065]
PTGIS	prostaglandin I2 synthase	enzyme	CYP5, CYP7 and CYP8 families	ENSCDRG00005013978	PTGIS	prostaglandin I2 synthase [Source:HGNC Symbol;Acc:HGNC:9603]
PEPD	peptidase D	enzyme	M24: Methionyl aminopeptidase	ENSCDRG00005017266	PEPD	peptidase D [Source:NCBI gene;Acc:105096717]
SIRT5	sirtuin 5	enzyme	3.5.1.- Histone deacetylases (HDACs)	ENSCDRG00005014876	SIRT5	sirtuin 5 [Source:HGNC Symbol;Acc:HGNC:14933]
RIOK1	RIO kinase 1	enzyme	RIO1 subfamily	ENSCDRG00005010469	RIOK1	RIO kinase 1 [Source:NCBI gene;Acc:105100193]
GRK4	G protein-coupled receptor kinase 4	enzyme	GRK4 subfamily	ENSCDRG00005003589	GRK4	G protein-coupled receptor kinase 4 [Source:NCBI gene;Acc:105103924]
NT5C	5', 3'-nucleotidase, cytosolic	enzyme	Adenosine turnover	ENSCDRG00005007642	ENSCDRG00005007642	nan
GTF3C4	general transcription factor IIIC subunit 4	enzyme	2.3.1.48 Histone acetyltransferases (HATs)	ENSCDRG00005004253	GTF3C4	general transcription factor IIIC subunit 4 [Source:NCBI gene;Acc:105085177]
SRMS	src-related kinase lacking C-terminal regulatory tyrosine and N-terminal myristylation sites	enzyme	Src family	ENSCDRG00005009590	SRMS	src-related kinase lacking C-terminal regulatory tyrosine and N-terminal myristylation sites [Source:HGNC Symbol;Acc:HGNC:11298]
STK35	serine/threonine kinase 35	enzyme	NKF4 family	ENSCDRG00005011709	STK35	serine/threonine kinase 35 [Source:HGNC Symbol;Acc:HGNC:16254]
PCSK2	proprotein convertase subtilisin/kexin type 2	enzyme	S8: Subtilisin	ENSCDRG00005004757	PCSK2	proprotein convertase subtilisin/kexin type 2 [Source:NCBI gene;Acc:105094118]
MMP24	matrix metallopeptidase 24	enzyme	M10: Matrix metallopeptidase	ENSCDRG00005014966	MMP24	matrix metallopeptidase 24 [Source:HGNC Symbol;Acc:HGNC:7172]
KDM5C	lysine demethylase 5C	enzyme	1.14.11.- Histone demethylases	ENSCDRG00005020258	KDM5C	lysine demethylase 5C [Source:HGNC Symbol;Acc:HGNC:11114]
PSMB2	proteasome 20S subunit beta 2	enzyme	T1: Proteasome	ENSCDRG00005021286	PSMB2	proteasome 20S subunit beta 2 [Source:NCBI gene;Acc:105086959]
F10	coagulation factor X	enzyme	S1: Chymotrypsin	ENSCDRG00005009751	F10	coagulation factor X [Source:NCBI gene;Acc:105091338]
PRMT1	protein arginine methyltransferase 1	enzyme	2.1.1.- Protein arginine N-methyltransferases	ENSCDRG00005008397	PRMT1	protein arginine methyltransferase 1 [Source:NCBI gene;Acc:105100196]
WNK4	WNK lysine deficient protein kinase 4	enzyme	Wnk family	ENSCDRG00005006646	WNK4	WNK lysine deficient protein kinase 4 [Source:NCBI gene;Acc:105090476]
PRKCG	protein kinase C gamma	enzyme	Alpha subfamily	ENSCDRG00005002473	PRKCG	protein kinase C gamma [Source:NCBI gene;Acc:105103265]
SGPP1	sphingosine-1-phosphate phosphatase 1	enzyme	Sphingosine 1-phosphate phosphatase	ENSCDRG00005000570	SGPP1	sphingosine-1-phosphate phosphatase 1 [Source:NCBI gene;Acc:105086202]
MAP2K2	mitogen-activated protein kinase kinase 2	enzyme	STE7 family	ENSCDRG00005004746	ENSCDRG00005004746	mitogen-activated protein kinase kinase 2 [Source:NCBI gene;Acc:105105302]
DYRK2	dual specificity tyrosine phosphorylation regulated kinase 2	enzyme	Dyrk2 subfamily	ENSCDRG00005013304	DYRK2	dual specificity tyrosine phosphorylation regulated kinase 2 [Source:HGNC Symbol;Acc:HGNC:3093]
PLA2G5	phospholipase A2 group V	enzyme	Phospholipase A<sub>2</sub>	ENSCDRG00005008409	PLA2G5	phospholipase A2 group V [Source:HGNC Symbol;Acc:HGNC:9038]
PKMYT1	protein kinase, membrane associated tyrosine/threonine 1	enzyme	WEE family	ENSCDRG00005018081	PKMYT1	protein kinase, membrane associated tyrosine/threonine 1 [Source:HGNC Symbol;Acc:HGNC:29650]
KDM4B	lysine demethylase 4B	enzyme	1.14.11.- Histone demethylases	ENSCDRG00005022004	KDM4B	lysine demethylase 4B [Source:HGNC Symbol;Acc:HGNC:29136]
PPAT	phosphoribosyl pyrophosphate amidotransferase	enzyme	C44: Phosphoribosyl pyrophosphate amidotransferase	ENSCDRG00005001530	PPAT	phosphoribosyl pyrophosphate amidotransferase [Source:HGNC Symbol;Acc:HGNC:9238]
MPST	mercaptopyruvate sulfurtransferase	enzyme	Hydrogen sulphide synthesis	ENSCDRG00005007473	MPST	mercaptopyruvate sulfurtransferase [Source:HGNC Symbol;Acc:HGNC:7223]
CPA4	carboxypeptidase A4	enzyme	M14: Carboxypeptidase A	ENSCDRG00005000947	CPA4	carboxypeptidase A4 [Source:NCBI gene;Acc:105085387]
GAD1	glutamate decarboxylase 1	enzyme	Decarboxylases	ENSCDRG00005000194	GAD1	glutamate decarboxylase 1 [Source:NCBI gene;Acc:105091082]
HAT1	histone acetyltransferase 1	enzyme	2.3.1.48 Histone acetyltransferases (HATs)	ENSCDRG00005000642	HAT1	histone acetyltransferase 1 [Source:NCBI gene;Acc:105091090]
EIF2AK4	eukaryotic translation initiation factor 2 alpha kinase 4	enzyme	GCN2 subfamily	ENSCDRG00005001097	EIF2AK4	eukaryotic translation initiation factor 2 alpha kinase 4 [Source:NCBI gene;Acc:105096892]
TTBK2	tau tubulin kinase 2	enzyme	Tau tubulin kinase (TTBK) family	ENSCDRG00005015634	TTBK2	tau tubulin kinase 2 [Source:NCBI gene;Acc:105101733]
TPH1	tryptophan hydroxylase 1	enzyme	Amino acid hydroxylases	ENSCDRG00005013726	TPH1	tryptophan hydroxylase 1 [Source:NCBI gene;Acc:105086665]
PLD2	phospholipase D2	enzyme	Hydrolases	ENSCDRG00005016141	PLD2	phospholipase D2 [Source:NCBI gene;Acc:105101475]
KLK14	kallikrein related peptidase 14	enzyme	S1: Chymotrypsin	ENSCDRG00005015489	KLK14	kallikrein related peptidase 14 [Source:HGNC Symbol;Acc:HGNC:6362]
KLK8	kallikrein related peptidase 8	enzyme	S1: Chymotrypsin	ENSCDRG00005014734	KLK8	kallikrein related peptidase 8 [Source:NCBI gene;Acc:105100154]
RIPK3	receptor interacting serine/threonine kinase 3	enzyme	Receptor interacting protein kinase (RIPK) family	ENSCDRG00005006625	RIPK3	receptor interacting serine/threonine kinase 3 [Source:HGNC Symbol;Acc:HGNC:10021]
ADCY4	adenylate cyclase 4	enzyme	Adenylyl cyclases (ACs)	ENSCDRG00005006489	ADCY4	adenylate cyclase 4 [Source:NCBI gene;Acc:105102432]
PARP2	poly(ADP-ribose) polymerase 2	enzyme	Poly ADP-ribose polymerases	ENSCDRG00005000434	PARP2	poly(ADP-ribose) polymerase 2 [Source:NCBI gene;Acc:105097681]
EGLN3	egl-9 family hypoxia inducible factor 3	enzyme	Prolyl hydroxylases	ENSCDRG00005015624	EGLN3	egl-9 family hypoxia inducible factor 3 [Source:NCBI gene;Acc:105094177]
ACE2	angiotensin I converting enzyme 2	enzyme	M2: Angiotensin-converting (ACE and ACE2)	ENSCDRG00005013210	ACE2	angiotensin I converting enzyme 2 [Source:NCBI gene;Acc:105100402]
STK33	serine/threonine kinase 33	enzyme	CAMK-unique family	ENSCDRG00005011504	STK33	serine/threonine kinase 33 [Source:NCBI gene;Acc:105093982]
CYP2E1	cytochrome P450 family 2 subfamily E member 1	enzyme	CYP2 family	ENSCDRG00005002295	CYP2E1	cytochrome P450 2E1 [Source:NCBI gene;Acc:105096474]
PAK4	p21 (RAC1) activated kinase 4	enzyme	PAKB subfamily	ENSCDRG00005015593	PAK4	p21 (RAC1) activated kinase 4 [Source:HGNC Symbol;Acc:HGNC:16059]
TRIM28	tripartite motif containing 28	enzyme	TIF1 family	ENSCDRG00005010567	TRIM28	tripartite motif containing 28 [Source:HGNC Symbol;Acc:HGNC:16384]
MAP3K10	mitogen-activated protein kinase kinase kinase 10	enzyme	MLK subfamily	ENSCDRG00005010076	MAP3K10	mitogen-activated protein kinase kinase kinase 10 [Source:HGNC Symbol;Acc:HGNC:6849]
SMPDL3B	sphingomyelin phosphodiesterase acid like 3B	enzyme	Sphingomyelin phosphodiesterase	ENSCDRG00005008566	SMPDL3B	sphingomyelin phosphodiesterase acid like 3B [Source:NCBI gene;Acc:105103320]
DNMT1	DNA methyltransferase 1	enzyme	2.1.1.- Methyltransferases	ENSCDRG00005006428	DNMT1	DNA methyltransferase 1 [Source:NCBI gene;Acc:105087645]
PNCK	pregnancy up-regulated nonubiquitous CaM kinase	enzyme	CAMK1 family	ENSCDRG00005020913	PNCK	pregnancy up-regulated nonubiquitous CaM kinase [Source:HGNC Symbol;Acc:HGNC:13415]
LATS1	large tumor suppressor kinase 1	enzyme	NDR family	ENSCDRG00005020994	LATS1	large tumor suppressor kinase 1 [Source:NCBI gene;Acc:105100911]
ACSS2	acyl-CoA synthetase short chain family member 2	enzyme	Acyl-CoA synthetases	ENSCDRG00005013262	ACSS2	acyl-CoA synthetase short chain family member 2 [Source:HGNC Symbol;Acc:HGNC:15814]
F12	coagulation factor XII	enzyme	S1: Chymotrypsin	ENSCDRG00005009012	F12	coagulation factor XII [Source:NCBI gene;Acc:105099592]
IDO1	indoleamine 2,3-dioxygenase 1	enzyme	1.13.11.- Dioxygenases	ENSCDRG00005009435	IDO1	indoleamine 2,3-dioxygenase 1 [Source:NCBI gene;Acc:105105464]
AOC3	amine oxidase copper containing 3	enzyme	1.-.-.- Oxidoreductases	ENSCDRG00005010395	AOC3	membrane primary amine oxidase-like [Source:NCBI gene;Acc:105090483]
TOP2A	DNA topoisomerase II alpha	enzyme	DNA topoisomerases	ENSCDRG00005007292	TOP2A	DNA topoisomerase II alpha [Source:NCBI gene;Acc:105099019]
PRKAB2	protein kinase AMP-activated non-catalytic subunit beta 2	enzyme	AMPK subfamily	ENSCDRG00005001847	PRKAB2	protein kinase AMP-activated non-catalytic subunit beta 2 [Source:NCBI gene;Acc:105089467]
TRIM21	tripartite motif containing 21	enzyme	2.3.2.27 RING-type E3 ubiquitin transferase	ENSCDRG00005001404	TRIM21	tripartite motif containing 21 [Source:NCBI gene;Acc:105096501]
RAF1	Raf-1 proto-oncogene, serine/threonine kinase	enzyme	RAF family	ENSCDRG00005017576	RAF1	Raf-1 proto-oncogene, serine/threonine kinase [Source:NCBI gene;Acc:105093099]
PRKAA1	protein kinase AMP-activated catalytic subunit alpha 1	enzyme	AMPK subfamily	ENSCDRG00005016610	PRKAA1	protein kinase AMP-activated catalytic subunit alpha 1 [Source:HGNC Symbol;Acc:HGNC:9376]
INPP5K	inositol polyphosphate-5-phosphatase K	enzyme	Inositol polyphosphate phosphatases	ENSCDRG00005011674	INPP5K	inositol polyphosphate-5-phosphatase K [Source:NCBI gene;Acc:105088121]
DDC	dopa decarboxylase	enzyme	Catecholamine turnover	ENSCDRG00005014922	DDC	dopa decarboxylase [Source:HGNC Symbol;Acc:HGNC:2719]
KDM6B	lysine demethylase 6B	enzyme	1.14.11.- Histone demethylases	ENSCDRG00005010017	ENSCDRG00005010017	nan
PRMT7	protein arginine methyltransferase 7	enzyme	2.1.1.- Protein arginine N-methyltransferases	ENSCDRG00005017600	PRMT7	protein arginine methyltransferase 7 [Source:NCBI gene;Acc:105088413]
LPIN3	lipin 3	enzyme	Lipid phosphate phosphatases	ENSCDRG00005010005	LPIN3	lipin 3 [Source:NCBI gene;Acc:105085027]
CASP9	caspase 9	enzyme	C14: Caspase	ENSCDRG00005019814	CASP9	caspase 9 [Source:NCBI gene;Acc:105107056]
PDE6A	phosphodiesterase 6A	enzyme	Phosphodiesterases, 3',5'-cyclic nucleotide (PDEs)	ENSCDRG00005002480	PDE6A	phosphodiesterase 6A [Source:NCBI gene;Acc:105097028]
CDK8	cyclin dependent kinase 8	enzyme	CDK8 subfamily	ENSCDRG00005021779	CDK8	cyclin dependent kinase 8 [Source:NCBI gene;Acc:105090374]
PIK3C2B	phosphatidylinositol-4-phosphate 3-kinase catalytic subunit type 2 beta	enzyme	Phosphatidylinositol-4-phosphate 3-kinase family	ENSCDRG00005015375	PIK3C2B	phosphatidylinositol-4-phosphate 3-kinase catalytic subunit type 2 beta [Source:NCBI gene;Acc:105098645]
DSTYK	dual serine/threonine and tyrosine protein kinase	enzyme	Other-unique family	ENSCDRG00005012983	DSTYK	dual serine/threonine and tyrosine protein kinase [Source:HGNC Symbol;Acc:HGNC:29043]
DCLK1	doublecortin like kinase 1	enzyme	DCAMKL family	ENSCDRG00005020769	DCLK1	doublecortin like kinase 1 [Source:NCBI gene;Acc:105100903]
KL	klotho	enzyme	3.2.1.- Glycosidases	ENSCDRG00005020640	KL	klotho [Source:HGNC Symbol;Acc:HGNC:6344]
KMT5C	lysine methyltransferase 5C	enzyme	2.1.1.43 Histone methyltransferases (HMTs)	ENSCDRG00005007496	KMT5C	lysine methyltransferase 5C [Source:HGNC Symbol;Acc:HGNC:28405]
PDE6B	phosphodiesterase 6B	enzyme	Phosphodiesterases, 3',5'-cyclic nucleotide (PDEs)	ENSCDRG00005006524	PDE6B	phosphodiesterase 6B [Source:NCBI gene;Acc:105100794]
CSNK1G2	casein kinase 1 gamma 2	enzyme	Casein kinase 1 (CK1) family	ENSCDRG00005011384	CSNK1G2	casein kinase 1 gamma 2 [Source:HGNC Symbol;Acc:HGNC:2455]
CNDP2	carnosine dipeptidase 2	enzyme	M20: Carnosine dipeptidase	ENSCDRG00005011922	CNDP2	carnosine dipeptidase 2 [Source:HGNC Symbol;Acc:HGNC:24437]
ADCK2	aarF domain containing kinase 2	enzyme	ABC1-A subfamily	ENSCDRG00005004011	ADCK2	aarF domain containing kinase 2 [Source:NCBI gene;Acc:105091651]
KRAS	KRAS proto-oncogene, GTPase	enzyme	RAS subfamily	ENSCDRG00005020107	KRAS	KRAS proto-oncogene, GTPase [Source:NCBI gene;Acc:105100066]
IMPA1	inositol monophosphatase 1	enzyme	Inositol monophosphatase	ENSCDRG00005016420	IMPA1	inositol monophosphatase 1 [Source:HGNC Symbol;Acc:HGNC:6050]
CA1	carbonic anhydrase 1	enzyme	Carbonic anhydrases	ENSCDRG00005017325	CA1	carbonic anhydrase 1 [Source:NCBI gene;Acc:105088505]
ADAM20	ADAM metallopeptidase domain 20	enzyme	M12: Astacin/Adamalysin	ENSCDRG00005004170	ADAM20	ADAM metallopeptidase domain 20 [Source:HGNC Symbol;Acc:HGNC:199]
LOXL2	lysyl oxidase like 2	enzyme	1.4.3.13 Lysyl oxidases	ENSCDRG00005016177	LOXL2	lysyl oxidase like 2 [Source:HGNC Symbol;Acc:HGNC:6666]
ELP3	elongator acetyltransferase complex subunit 3	enzyme	2.3.1.48 Histone acetyltransferases (HATs)	ENSCDRG00005019750	ELP3	elongator acetyltransferase complex subunit 3 [Source:HGNC Symbol;Acc:HGNC:20696]
CDK7	cyclin dependent kinase 7	enzyme	CDK7 subfamily	ENSCDRG00005004563	CDK7	cyclin dependent kinase 7 [Source:NCBI gene;Acc:105084765]
IRAK2	interleukin 1 receptor associated kinase 2	enzyme	Interleukin-1 receptor-associated kinase (IRAK) family	ENSCDRG00005014940	IRAK2	interleukin 1 receptor associated kinase 2 [Source:NCBI gene;Acc:105093117]
CAMK1	calcium/calmodulin dependent protein kinase I	enzyme	CAMK1 family	ENSCDRG00005011303	ENSCDRG00005011303	calcium/calmodulin-dependent protein kinase type 1 [Source:NCBI gene;Acc:105106629]
CHIA	chitinase acidic	enzyme	Chitinases	ENSCDRG00005001168	CHIA	chitinase acidic [Source:NCBI gene;Acc:105100466]
HMGCS2	3-hydroxy-3-methylglutaryl-CoA synthase 2	enzyme	Lanosterol biosynthesis pathway	ENSCDRG00005002749	HMGCS2	3-hydroxy-3-methylglutaryl-CoA synthase 2 [Source:NCBI gene;Acc:105089471]
PTPN22	protein tyrosine phosphatase non-receptor type 22	enzyme	Protein tyrosine phosphatases non-receptor type (PTPN)	ENSCDRG00005005810	PTPN22	protein tyrosine phosphatase non-receptor type 22 [Source:NCBI gene;Acc:105085881]
ADAM30	ADAM metallopeptidase domain 30	enzyme	M12: Astacin/Adamalysin	ENSCDRG00005002687	ENSCDRG00005002687	nan
ROCK2	Rho associated coiled-coil containing protein kinase 2	enzyme	Rho kinase	ENSCDRG00005003503	ROCK2	Rho associated coiled-coil containing protein kinase 2 [Source:HGNC Symbol;Acc:HGNC:10252]
LPIN1	lipin 1	enzyme	Lipid phosphate phosphatases	ENSCDRG00005003875	LPIN1	lipin 1 [Source:NCBI gene;Acc:105097174]
ERN2	endoplasmic reticulum to nucleus signaling 2	enzyme	IRE family	ENSCDRG00005004205	ERN2	endoplasmic reticulum to nucleus signaling 2 [Source:NCBI gene;Acc:105094848]
STK26	serine/threonine kinase 26	enzyme	YSK subfamily	ENSCDRG00005012797	STK26	serine/threonine kinase 26 [Source:HGNC Symbol;Acc:HGNC:18174]
CYP2J2	cytochrome P450 family 2 subfamily J member 2	enzyme	CYP2 family	ENSCDRG00005014670	ENSCDRG00005014670	cytochrome P450 2J2-like [Source:NCBI gene;Acc:105092804]
DAGLA	diacylglycerol lipase alpha	enzyme	2-Acylglycerol ester turnover	ENSCDRG00005007887	DAGLA	diacylglycerol lipase alpha [Source:HGNC Symbol;Acc:HGNC:1165]
CLOCK	clock circadian regulator	enzyme	2.3.1.48 Histone acetyltransferases (HATs)	ENSCDRG00005002007	CLOCK	clock circadian regulator [Source:HGNC Symbol;Acc:HGNC:2082]
TPP2	tripeptidyl peptidase 2	enzyme	S8: Subtilisin	ENSCDRG00005019129	TPP2	tripeptidyl peptidase 2 [Source:NCBI gene;Acc:105094097]
CTSL	cathepsin L	enzyme	C1: Papain	ENSCDRG00005018728	CTSL	cathepsin L [Source:NCBI gene;Acc:105084695]
ADAM19	ADAM metallopeptidase domain 19	enzyme	M12: Astacin/Adamalysin	ENSCDRG00005000255	ADAM19	ADAM metallopeptidase domain 19 [Source:HGNC Symbol;Acc:HGNC:197]
TAOK3	TAO kinase 3	enzyme	TAO subfamily	ENSCDRG00005016981	TAOK3	TAO kinase 3 [Source:NCBI gene;Acc:105104906]
SRPK2	SRSF protein kinase 2	enzyme	SRPK family	ENSCDRG00005009448	SRPK2	SRSF protein kinase 2 [Source:HGNC Symbol;Acc:HGNC:11306]
NT5E	5'-nucleotidase ecto	enzyme	Adenosine turnover	ENSCDRG00005004651	NT5E	5'-nucleotidase ecto [Source:NCBI gene;Acc:105089243]
MAP3K7	mitogen-activated protein kinase kinase kinase 7	enzyme	TAK1 subfamily	ENSCDRG00005016534	MAP3K7	mitogen-activated protein kinase kinase kinase 7 [Source:NCBI gene;Acc:105095522]
CDK4	cyclin dependent kinase 4	enzyme	CDK4 subfamily	ENSCDRG00005019885	CDK4	cyclin dependent kinase 4 [Source:NCBI gene;Acc:105100330]
SMPD2	sphingomyelin phosphodiesterase 2	enzyme	Sphingomyelin phosphodiesterase	ENSCDRG00005007239	SMPD2	sphingomyelin phosphodiesterase 2 [Source:NCBI gene;Acc:105097111]
TEC	tec protein tyrosine kinase	enzyme	Tec family	ENSCDRG00005003076	TEC	tec protein tyrosine kinase [Source:NCBI gene;Acc:105099938]
CPM	carboxypeptidase M	enzyme	M14: Carboxypeptidase A	ENSCDRG00005015280	CPM	carboxypeptidase M [Source:HGNC Symbol;Acc:HGNC:2311]
MDM2	MDM2 proto-oncogene	enzyme	E3 ubiquitin ligase components	ENSCDRG00005014898	MDM2	MDM2 proto-oncogene [Source:NCBI gene;Acc:105101086]
EGLN1	egl-9 family hypoxia inducible factor 1	enzyme	Prolyl hydroxylases	ENSCDRG00005012530	ENSCDRG00005012530	egl-9 family hypoxia inducible factor 1 [Source:HGNC Symbol;Acc:HGNC:1232]
CYP27A1	cytochrome P450 family 27 subfamily A member 1	enzyme	CYP24, CYP26 and CYP27 families	ENSCDRG00005000044	CYP27A1	sterol 26-hydroxylase, mitochondrial [Source:NCBI gene;Acc:105096090]
SCYL2	SCY1 like pseudokinase 2	enzyme	SCY1 family	ENSCDRG00005017362	SCYL2	SCY1 like pseudokinase 2 [Source:NCBI gene;Acc:105097447]
NEK3	NIMA related kinase 3	enzyme	NIMA (never in mitosis gene a)- related kinase (NEK) family	ENSCDRG00005021602	NEK3	NIMA related kinase 3 [Source:HGNC Symbol;Acc:HGNC:7746]
SETDB2	SET domain bifurcated histone lysine methyltransferase 2	enzyme	2.1.1.43 Histone methyltransferases (HMTs)	ENSCDRG00005005649	SETDB2	SET domain bifurcated histone lysine methyltransferase 2 [Source:NCBI gene;Acc:105101932]
AOAH	acyloxyacyl hydrolase	enzyme	3.1.1.- Carboxylic Ester Hydrolases	ENSCDRG00005000414	AOAH	acyloxyacyl hydrolase [Source:NCBI gene;Acc:105095876]
ADAMTS7	ADAM metallopeptidase with thrombospondin type 1 motif 7	enzyme	M12: Astacin/Adamalysin	ENSCDRG00005018509	ADAMTS7	ADAM metallopeptidase with thrombospondin type 1 motif 7 [Source:HGNC Symbol;Acc:HGNC:223]
ALPK3	alpha kinase 3	enzyme	Other alpha kinase family kinases	ENSCDRG00005013825	ALPK3	alpha kinase 3 [Source:HGNC Symbol;Acc:HGNC:17574]
KAT7	lysine acetyltransferase 7	enzyme	2.3.1.48 Histone acetyltransferases (HATs)	ENSCDRG00005010423	KAT7	lysine acetyltransferase 7 [Source:NCBI gene;Acc:105104831]
BLK	BLK proto-oncogene, Src family tyrosine kinase	enzyme	Src family	ENSCDRG00005010466	BLK	BLK proto-oncogene, Src family tyrosine kinase [Source:HGNC Symbol;Acc:HGNC:1057]
RPS6KC1	ribosomal protein S6 kinase C1	enzyme	RSKL family	ENSCDRG00005017537	RPS6KC1	ribosomal protein S6 kinase C1 [Source:HGNC Symbol;Acc:HGNC:10439]
SMPD4	sphingomyelin phosphodiesterase 4	enzyme	Sphingomyelin phosphodiesterase	ENSCDRG00005010122	SMPD4	sphingomyelin phosphodiesterase 4 [Source:NCBI gene;Acc:105095230]
GAD2	glutamate decarboxylase 2	enzyme	Decarboxylases	ENSCDRG00005009327	GAD2	glutamate decarboxylase 2 [Source:HGNC Symbol;Acc:HGNC:4093]
CDK9	cyclin dependent kinase 9	enzyme	CDK9 subfamily	ENSCDRG00005013026	CDK9	cyclin dependent kinase 9 [Source:NCBI gene;Acc:105092598]
CTSV	cathepsin V	enzyme	C1: Papain	ENSCDRG00005017297	CTSV	cathepsin V [Source:HGNC Symbol;Acc:HGNC:2538]
PIM1	Pim-1 proto-oncogene, serine/threonine kinase	enzyme	PIM family	ENSCDRG00005012825	PIM1	Pim-1 proto-oncogene, serine/threonine kinase [Source:NCBI gene;Acc:105087031]
RIPK1	receptor interacting serine/threonine kinase 1	enzyme	Receptor interacting protein kinase (RIPK) family	ENSCDRG00005015351	RIPK1	receptor interacting serine/threonine kinase 1 [Source:HGNC Symbol;Acc:HGNC:10019]
PRCP	prolylcarboxypeptidase	enzyme	S28: Lysosomal Pro-Xaa carboxypeptidase	ENSCDRG00005000165	PRCP	prolylcarboxypeptidase [Source:NCBI gene;Acc:105097619]
GGH	gamma-glutamyl hydrolase	enzyme	C26: Gamma-glutamyl hydrolase	ENSCDRG00005020657	GGH	gamma-glutamyl hydrolase [Source:NCBI gene;Acc:105094475]
NEK1	NIMA related kinase 1	enzyme	NIMA (never in mitosis gene a)- related kinase (NEK) family	ENSCDRG00005013105	NEK1	NIMA related kinase 1 [Source:HGNC Symbol;Acc:HGNC:7744]
MMP7	matrix metallopeptidase 7	enzyme	M10: Matrix metallopeptidase	ENSCDRG00005001294	MMP7	matrix metallopeptidase 7 [Source:HGNC Symbol;Acc:HGNC:7174]
MMP20	matrix metallopeptidase 20	enzyme	M10: Matrix metallopeptidase	ENSCDRG00005001309	MMP20	matrix metallopeptidase 20 [Source:NCBI gene;Acc:105087172]
MMP27	matrix metallopeptidase 27	enzyme	M10: Matrix metallopeptidase	ENSCDRG00005001340	MMP27	matrix metallopeptidase 27 [Source:HGNC Symbol;Acc:HGNC:14250]
MMP13	matrix metallopeptidase 13	enzyme	M10: Matrix metallopeptidase	ENSCDRG00005001466	MMP13	matrix metallopeptidase 13 [Source:NCBI gene;Acc:105087166]
CASP1	caspase 1	enzyme	C14: Caspase	ENSCDRG00005001784	ENSCDRG00005001784	caspase 1 [Source:NCBI gene;Acc:105100418]
CASP5	caspase 5	enzyme	C14: Caspase	ENSCDRG00005001740	ENSCDRG00005001740	caspase-13-like [Source:NCBI gene;Acc:105100419]
MAP2K5	mitogen-activated protein kinase kinase 5	enzyme	STE7 family	ENSCDRG00005003152	MAP2K5	mitogen-activated protein kinase kinase 5 [Source:NCBI gene;Acc:105093278]
ITPKA	inositol-trisphosphate 3-kinase A	enzyme	Inositol 1,4,5-trisphosphate 3-kinases	ENSCDRG00005020039	ITPKA	inositol-trisphosphate 3-kinase A [Source:NCBI gene;Acc:105096854]
PLCB2	phospholipase C beta 2	enzyme	Phosphoinositide-specific phospholipase C	ENSCDRG00005000904	ENSCDRG00005000904	nan
PAK6	p21 (RAC1) activated kinase 6	enzyme	PAKB subfamily	ENSCDRG00005000964	PAK6	p21 (RAC1) activated kinase 6 [Source:HGNC Symbol;Acc:HGNC:16061]
ADAM10	ADAM metallopeptidase domain 10	enzyme	M12: Astacin/Adamalysin	ENSCDRG00005011988	ADAM10	ADAM metallopeptidase domain 10 [Source:NCBI gene;Acc:105088967]
DUOX1	dual oxidase 1	enzyme	NADPH oxidases	ENSCDRG00005008355	DUOX1	dual oxidase 1 [Source:HGNC Symbol;Acc:HGNC:3062]
CYP19A1	cytochrome P450 family 19 subfamily A member 1	enzyme	CYP11, CYP17, CYP19, CYP20 and CYP21 families	ENSCDRG00005018180	ENSCDRG00005018180	nan
ADCY3	adenylate cyclase 3	enzyme	Adenylyl cyclases (ACs)	ENSCDRG00005009564	ADCY3	adenylate cyclase 3 [Source:NCBI gene;Acc:105100030]
CYP1B1	cytochrome P450 family 1 subfamily B member 1	enzyme	CYP1 family	ENSCDRG00005007457	CYP1B1	cytochrome P450 1B1 [Source:NCBI gene;Acc:105103641]
PREPL	prolyl endopeptidase like	enzyme	S9: Prolyl oligopeptidase	ENSCDRG00005022007	PREPL	prolyl endopeptidase like [Source:NCBI gene;Acc:105103562]
FBXO11	F-box protein 11	enzyme	2.1.1.- Protein arginine N-methyltransferases	ENSCDRG00005022378	FBXO11	F-box protein 11 [Source:HGNC Symbol;Acc:HGNC:13590]
ENTPD1	ectonucleoside triphosphate diphosphohydrolase 1	enzyme	Hydrolases	ENSCDRG00005010855	ENTPD1	ectonucleoside triphosphate diphosphohydrolase 1 [Source:NCBI gene;Acc:105084264]
PLCE1	phospholipase C epsilon 1	enzyme	Phosphoinositide-specific phospholipase C	ENSCDRG00005013742	PLCE1	phospholipase C epsilon 1 [Source:NCBI gene;Acc:105084245]
ADAMTS14	ADAM metallopeptidase with thrombospondin type 1 motif 14	enzyme	M12: Astacin/Adamalysin	ENSCDRG00005009401	ADAMTS14	ADAM metallopeptidase with thrombospondin type 1 motif 14 [Source:HGNC Symbol;Acc:HGNC:14899]
CDK15	cyclin dependent kinase 15	enzyme	TAIRE subfamily	ENSCDRG00005019534	CDK15	cyclin dependent kinase 15 [Source:NCBI gene;Acc:105098967]
IDH1	isocitrate dehydrogenase (NADP(+)) 1	enzyme	1.1.1.42 Isocitrate dehydrogenases	ENSCDRG00005015742	IDH1	isocitrate dehydrogenase (NADP(+)) 1 [Source:NCBI gene;Acc:105093551]
SENP7	SUMO specific peptidase 7	enzyme	C48: Ulp1 endopeptidase	ENSCDRG00005001480	SENP7	SUMO specific peptidase 7 [Source:NCBI gene;Acc:105087720]
PRKG2	protein kinase cGMP-dependent 2	enzyme	Protein kinase G (PKG) family	ENSCDRG00005002430	PRKG2	protein kinase cGMP-dependent 2 [Source:NCBI gene;Acc:105091814]
PDE5A	phosphodiesterase 5A	enzyme	Phosphodiesterases, 3',5'-cyclic nucleotide (PDEs)	ENSCDRG00005003851	PDE5A	phosphodiesterase 5A [Source:NCBI gene;Acc:105093648]
NAAA	N-acylethanolamine acid amidase	enzyme	<i>N</i>-Acylethanolamine turnover	ENSCDRG00005000847	NAAA	N-acylethanolamine acid amidase [Source:HGNC Symbol;Acc:HGNC:736]
BMP2K	BMP2 inducible kinase	enzyme	Numb-associated kinase (NAK) family	ENSCDRG00005002238	BMP2K	BMP2 inducible kinase [Source:HGNC Symbol;Acc:HGNC:18041]
CDKL2	cyclin dependent kinase like 2	enzyme	Cyclin-dependent kinase-like (CDKL) family	ENSCDRG00005000615	CDKL2	cyclin dependent kinase like 2 [Source:NCBI gene;Acc:105091464]
ENPEP	glutamyl aminopeptidase	enzyme	M1: Aminopeptidase N	ENSCDRG00005008426	ENPEP	glutamyl aminopeptidase [Source:NCBI gene;Acc:105089907]
CASP6	caspase 6	enzyme	C14: Caspase	ENSCDRG00005010019	CASP6	caspase 6 [Source:HGNC Symbol;Acc:HGNC:1507]
PDE6H	phosphodiesterase 6H	enzyme	Phosphodiesterases, 3',5'-cyclic nucleotide (PDEs)	ENSCDRG00005014644	PDE6H	phosphodiesterase 6H [Source:NCBI gene;Acc:105096509]
PIK3C2G	phosphatidylinositol-4-phosphate 3-kinase catalytic subunit type 2 gamma	enzyme	Phosphatidylinositol-4-phosphate 3-kinase family	ENSCDRG00005015989	PIK3C2G	phosphatidylinositol-4-phosphate 3-kinase catalytic subunit type 2 gamma [Source:NCBI gene;Acc:105096498]
PLCZ1	phospholipase C zeta 1	enzyme	Phosphoinositide-specific phospholipase C	ENSCDRG00005016663	PLCZ1	phospholipase C zeta 1 [Source:HGNC Symbol;Acc:HGNC:19218]
TPH2	tryptophan hydroxylase 2	enzyme	Amino acid hydroxylases	ENSCDRG00005017639	TPH2	tryptophan hydroxylase 2 [Source:HGNC Symbol;Acc:HGNC:20692]
CELA1	chymotrypsin like elastase 1	enzyme	S1: Chymotrypsin	ENSCDRG00005013411	CELA1	chymotrypsin like elastase 1 [Source:NCBI gene;Acc:105107155]
CERS5	ceramide synthase 5	enzyme	Ceramide synthase	ENSCDRG00005004744	ENSCDRG00005004744	nan
MAP3K12	mitogen-activated protein kinase kinase kinase 12	enzyme	LZK subfamily	ENSCDRG00005004763	MAP3K12	mitogen-activated protein kinase kinase kinase 12 [Source:NCBI gene;Acc:105094560]
SETD1B	SET domain containing 1B, histone lysine methyltransferase	enzyme	2.1.1.43 Histone methyltransferases (HMTs)	ENSCDRG00005019576	SETD1B	SET domain containing 1B, histone lysine methyltransferase [Source:HGNC Symbol;Acc:HGNC:29187]
TSSK4	testis specific serine kinase 4	enzyme	Testis specific kinase (TSSK) family	ENSCDRG00005016998	TSSK4	testis specific serine kinase 4 [Source:HGNC Symbol;Acc:HGNC:19825]
ADAM21	ADAM metallopeptidase domain 21	enzyme	M12: Astacin/Adamalysin	ENSCDRG00005004155	ADAM21	ADAM metallopeptidase domain 21 [Source:NCBI gene;Acc:105086257]
DUOX2	dual oxidase 2	enzyme	NADPH oxidases	ENSCDRG00005008808	DUOX2	dual oxidase 2 [Source:HGNC Symbol;Acc:HGNC:13273]
HDC	histidine decarboxylase	enzyme	Decarboxylases	ENSCDRG00005019210	HDC	histidine decarboxylase [Source:NCBI gene;Acc:105102455]
NCOA2	nuclear receptor coactivator 2	enzyme	2.3.1.48 Histone acetyltransferases (HATs)	ENSCDRG00005021163	NCOA2	nuclear receptor coactivator 2 [Source:NCBI gene;Acc:105103892]
CYP11A1	cytochrome P450 family 11 subfamily A member 1	enzyme	CYP11, CYP17, CYP19, CYP20 and CYP21 families	ENSCDRG00005005258	CYP11A1	cytochrome P450 family 11 subfamily A member 1 [Source:HGNC Symbol;Acc:HGNC:2590]
CYP1A1	cytochrome P450 family 1 subfamily A member 1	enzyme	CYP1 family	ENSCDRG00005004932	CYP1A1	cytochrome P450 1A1 [Source:NCBI gene;Acc:105087262]
ADAMTS17	ADAM metallopeptidase with thrombospondin type 1 motif 17	enzyme	M12: Astacin/Adamalysin	ENSCDRG00005018609	ADAMTS17	ADAM metallopeptidase with thrombospondin type 1 motif 17 [Source:HGNC Symbol;Acc:HGNC:17109]
ULK3	unc-51 like kinase 3	enzyme	Unc-51-like kinase (ULK) family	ENSCDRG00005004725	ULK3	unc-51 like kinase 3 [Source:NCBI gene;Acc:105087255]
PCSK6	proprotein convertase subtilisin/kexin type 6	enzyme	S8: Subtilisin	ENSCDRG00005017712	PCSK6	proprotein convertase subtilisin/kexin type 6 [Source:HGNC Symbol;Acc:HGNC:8569]
CYP1A2	cytochrome P450 family 1 subfamily A member 2	enzyme	CYP1 family	ENSCDRG00005004910	CYP1A2	cytochrome P450 family 1 subfamily A member 2 [Source:HGNC Symbol;Acc:HGNC:2596]
ABHD2	abhydrolase domain containing 2, acylglycerol lipase	enzyme	2-Acylglycerol ester turnover	ENSCDRG00005020558	ABHD2	abhydrolase domain containing 2 [Source:NCBI gene;Acc:105094666]
FURIN	furin, paired basic amino acid cleaving enzyme	enzyme	S8: Subtilisin	ENSCDRG00005012204	FURIN	furin, paired basic amino acid cleaving enzyme [Source:NCBI gene;Acc:105094698]
MYLK3	myosin light chain kinase 3	enzyme	Myosin Light Chain Kinase (MLCK) family	ENSCDRG00005021954	MYLK3	myosin light chain kinase 3 [Source:HGNC Symbol;Acc:HGNC:29826]
ADAMTS18	ADAM metallopeptidase with thrombospondin type 1 motif 18	enzyme	M12: Astacin/Adamalysin	ENSCDRG00005015619	ADAMTS18	ADAM metallopeptidase with thrombospondin type 1 motif 18 [Source:HGNC Symbol;Acc:HGNC:17110]
NUDT7	nudix hydrolase 7	enzyme	Hydrolases	ENSCDRG00005015789	NUDT7	nudix hydrolase 7 [Source:NCBI gene;Acc:105091794]
GCSH	glycine cleavage system protein H	enzyme	Glycine recycling	ENSCDRG00005019029	#N/A	#N/A
MBTPS1	membrane bound transcription factor peptidase, site 1	enzyme	S8: Subtilisin	ENSCDRG00005001411	MBTPS1	membrane bound transcription factor peptidase, site 1 [Source:NCBI gene;Acc:105089450]
PDPK1	3-phosphoinositide dependent protein kinase 1	enzyme	PDK1 family	ENSCDRG00005016560	PDPK1	3-phosphoinositide dependent protein kinase 1 [Source:NCBI gene;Acc:105099701]
GALNS	galactosamine (N-acetyl)-6-sulfatase	enzyme	3.1.-.- Ester bond enzymes	ENSCDRG00005020434	GALNS	galactosamine (N-acetyl)-6-sulfatase [Source:HGNC Symbol;Acc:HGNC:4122]
KSR1	kinase suppressor of ras 1	enzyme	RAF family	ENSCDRG00005015991	KSR1	kinase suppressor of ras 1 [Source:HGNC Symbol;Acc:HGNC:6465]
CTRL	chymotrypsin like	enzyme	S1: Chymotrypsin	ENSCDRG00005015075	ENSCDRG00005015075	nan
NPEPPS	aminopeptidase puromycin sensitive	enzyme	M1: Aminopeptidase N	ENSCDRG00005019119	NPEPPS	aminopeptidase puromycin sensitive [Source:NCBI gene;Acc:105106945]
IMPA2	inositol monophosphatase 2	enzyme	Inositol monophosphatase	ENSCDRG00005020436	IMPA2	inositol monophosphatase 2 [Source:HGNC Symbol;Acc:HGNC:6051]
MINK1	misshapen like kinase 1	enzyme	MSN subfamily	ENSCDRG00005015239	MINK1	misshapen like kinase 1 [Source:HGNC Symbol;Acc:HGNC:17565]
PIK3R5	phosphoinositide-3-kinase regulatory subunit 5	enzyme	Phosphatidylinositol kinases	ENSCDRG00005016417	PIK3R5	phosphoinositide-3-kinase regulatory subunit 5 [Source:HGNC Symbol;Acc:HGNC:30035]
CSNK1D	casein kinase 1 delta	enzyme	Casein kinase 1 (CK1) family	ENSCDRG00005010301	CSNK1D	casein kinase 1 delta [Source:NCBI gene;Acc:105102221]
MAPK4	mitogen-activated protein kinase 4	enzyme	ERK subfamily	ENSCDRG00005009618	MAPK4	mitogen-activated protein kinase 4 [Source:HGNC Symbol;Acc:HGNC:6878]
PNMT	phenylethanolamine N-methyltransferase	enzyme	Catecholamine turnover	ENSCDRG00005004834	PNMT	phenylethanolamine N-methyltransferase [Source:HGNC Symbol;Acc:HGNC:9160]
PLPP2	phospholipid phosphatase 2	enzyme	Lipid phosphate phosphatases	ENSCDRG00005019551	PLPP2	phospholipid phosphatase 2 [Source:NCBI gene;Acc:105093401]
DPP9	dipeptidyl peptidase 9	enzyme	S9: Prolyl oligopeptidase	ENSCDRG00005022025	DPP9	dipeptidyl peptidase 9 [Source:HGNC Symbol;Acc:HGNC:18648]
SIRT3	sirtuin 3	enzyme	3.5.1.- Histone deacetylases (HDACs)	ENSCDRG00005003339	SIRT3	sirtuin 3 [Source:NCBI gene;Acc:105105732]
HUNK	hormonally up-regulated Neu-associated kinase	enzyme	HUNK subfamily	ENSCDRG00005001856	HUNK	hormonally up-regulated Neu-associated kinase [Source:HGNC Symbol;Acc:HGNC:13326]
SIK1	salt inducible kinase 1	enzyme	QIK subfamily	ENSCDRG00005012900	SIK1	salt inducible kinase 1 [Source:NCBI gene;Acc:105105909]
SCYL1	SCY1 like pseudokinase 1	enzyme	SCY1 family	ENSCDRG00005008708	SCYL1	SCY1 like pseudokinase 1 [Source:HGNC Symbol;Acc:HGNC:14372]
AKT1	AKT serine/threonine kinase 1	enzyme	Akt (Protein kinase B, PKB) family	ENSCDRG00005000405	AKT1	AKT serine/threonine kinase 1 [Source:HGNC Symbol;Acc:HGNC:391]
ADAMTS10	ADAM metallopeptidase with thrombospondin type 1 motif 10	enzyme	M12: Astacin/Adamalysin	ENSCDRG00005014083	ADAMTS10	ADAM metallopeptidase with thrombospondin type 1 motif 10 [Source:HGNC Symbol;Acc:HGNC:13201]
RNPEPL1	arginyl aminopeptidase like 1	enzyme	M1: Aminopeptidase N	ENSCDRG00005017490	RNPEPL1	arginyl aminopeptidase like 1 [Source:HGNC Symbol;Acc:HGNC:10079]
CARM1	coactivator associated arginine methyltransferase 1	enzyme	2.1.1.- Protein arginine N-methyltransferases	ENSCDRG00005009567	CARM1	coactivator associated arginine methyltransferase 1 [Source:HGNC Symbol;Acc:HGNC:23393]
PSMB6	proteasome 20S subunit beta 6	enzyme	T1: Proteasome	ENSCDRG00005016256	PSMB6	proteasome 20S subunit beta 6 [Source:NCBI gene;Acc:105101478]
PADI3	peptidyl arginine deiminase 3	enzyme	3.5.3.15 Peptidyl arginine deiminases (PADI)	ENSCDRG00005005341	PADI3	peptidyl arginine deiminase 3 [Source:HGNC Symbol;Acc:HGNC:18337]
PADI1	peptidyl arginine deiminase 1	enzyme	3.5.3.15 Peptidyl arginine deiminases (PADI)	ENSCDRG00005005209	PADI1	peptidyl arginine deiminase 1 [Source:HGNC Symbol;Acc:HGNC:18367]
PLK4	polo like kinase 4	enzyme	Polo-like kinase (PLK) family	ENSCDRG00005002326	PLK4	polo like kinase 4 [Source:NCBI gene;Acc:105087060]
MAP3K6	mitogen-activated protein kinase kinase kinase 6	enzyme	STE11 family	ENSCDRG00005007422	MAP3K6	mitogen-activated protein kinase kinase kinase 6 [Source:HGNC Symbol;Acc:HGNC:6858]
PRKACB	protein kinase cAMP-activated catalytic subunit beta	enzyme	Protein kinase A (PKA) family	ENSCDRG00005007007	PRKACB	protein kinase cAMP-activated catalytic subunit beta [Source:NCBI gene;Acc:105095035]
AZIN2	antizyme inhibitor 2	enzyme	Decarboxylases	ENSCDRG00005021000	AZIN2	antizyme inhibitor 2 [Source:HGNC Symbol;Acc:HGNC:29957]
ADCY10	adenylate cyclase 10	enzyme	Adenylyl cyclases (ACs)	ENSCDRG00005005498	ADCY10	adenylate cyclase 10 [Source:NCBI gene;Acc:105092727]
ABL2	ABL proto-oncogene 2, non-receptor tyrosine kinase	enzyme	Abl family	ENSCDRG00005009049	ABL2	ABL proto-oncogene 2, non-receptor tyrosine kinase [Source:NCBI gene;Acc:105099976]
SETDB1	SET domain bifurcated histone lysine methyltransferase 1	enzyme	2.1.1.43 Histone methyltransferases (HMTs)	ENSCDRG00005018003	SETDB1	SET domain bifurcated histone lysine methyltransferase 1 [Source:NCBI gene;Acc:105103196]
CTSK	cathepsin K	enzyme	C1: Papain	ENSCDRG00005017757	CTSK	cathepsin K [Source:NCBI gene;Acc:105103193]
PI4KB	phosphatidylinositol 4-kinase beta	enzyme	1-phosphatidylinositol 4-kinase family	ENSCDRG00005010094	PI4KB	phosphatidylinositol 4-kinase beta [Source:NCBI gene;Acc:105103215]
PIP5K1A	phosphatidylinositol-4-phosphate 5-kinase type 1 alpha	enzyme	Phosphatidylinositol phosphate kinases	ENSCDRG00005009542	PIP5K1A	phosphatidylinositol-4-phosphate 5-kinase type 1 alpha [Source:HGNC Symbol;Acc:HGNC:8994]
CERS2	ceramide synthase 2	enzyme	Ceramide synthase	ENSCDRG00005018124	CERS2	ceramide synthase 2 [Source:NCBI gene;Acc:105103195]
DYRK3	dual specificity tyrosine phosphorylation regulated kinase 3	enzyme	Dyrk2 subfamily	ENSCDRG00005009886	DYRK3	dual specificity tyrosine phosphorylation regulated kinase 3 [Source:NCBI gene;Acc:105098611]
SMYD2	SET and MYND domain containing 2	enzyme	2.1.1.43 Histone methyltransferases (HMTs)	ENSCDRG00005017161	SMYD2	SET and MYND domain containing 2 [Source:NCBI gene;Acc:105099293]
ADAM15	ADAM metallopeptidase domain 15	enzyme	M12: Astacin/Adamalysin	ENSCDRG00005004551	ADAM15	ADAM metallopeptidase domain 15 [Source:HGNC Symbol;Acc:HGNC:193]
PKLR	pyruvate kinase L/R	enzyme	2.7.1.40 Pyruvate kinases	ENSCDRG00005008136	PKLR	pyruvate kinase L/R [Source:HGNC Symbol;Acc:HGNC:9020]
DEGS1	delta 4-desaturase, sphingolipid 1	enzyme	Sphingolipid &Delta;<sup>4</sup>-desaturase	ENSCDRG00005019393	DEGS1	delta 4-desaturase, sphingolipid 1 [Source:NCBI gene;Acc:105099817]
ITPKB	inositol-trisphosphate 3-kinase B	enzyme	Inositol 1,4,5-trisphosphate 3-kinases	ENSCDRG00005004264	ITPKB	inositol-trisphosphate 3-kinase B [Source:HGNC Symbol;Acc:HGNC:6179]
CDC42BPA	CDC42 binding protein kinase alpha	enzyme	GEK subfamily	ENSCDRG00005004650	CDC42BPA	CDC42 binding protein kinase alpha [Source:NCBI gene;Acc:105099558]
PARP1	poly(ADP-ribose) polymerase 1	enzyme	Poly ADP-ribose polymerases	ENSCDRG00005004094	PARP1	poly(ADP-ribose) polymerase 1 [Source:NCBI gene;Acc:105099605]
PSEN2	presenilin 2	enzyme	A22: Presenilin	ENSCDRG00005004293	ENSCDRG00005004293	presenilin 2 [Source:NCBI gene;Acc:105099573]
REN	renin	enzyme	A1: Pepsin	ENSCDRG00005016286	REN	renin [Source:NCBI gene;Acc:105098650]
CPO	carboxypeptidase O	enzyme	M14: Carboxypeptidase A	ENSCDRG00005016423	CPO	carboxypeptidase O [Source:HGNC Symbol;Acc:HGNC:21011]
ECE2	endothelin converting enzyme 2	enzyme	M13: Neprilysin	ENSCDRG00005002940	ENSCDRG00005002940	endothelin converting enzyme 2 [Source:HGNC Symbol;Acc:HGNC:13275]
TBCK	TBC1 domain containing kinase	enzyme	TBCK family	ENSCDRG00005013156	TBCK	TBC1 domain containing kinase [Source:HGNC Symbol;Acc:HGNC:28261]
SETD7	SET domain containing 7, histone lysine methyltransferase	enzyme	2.1.1.43 Histone methyltransferases (HMTs)	ENSCDRG00005001339	SETD7	SET domain containing 7, histone lysine methyltransferase [Source:HGNC Symbol;Acc:HGNC:30412]
CYP4V2	cytochrome P450 family 4 subfamily V member 2	enzyme	CYP4 family	ENSCDRG00005011878	CYP4V2	cytochrome P450 family 4 subfamily V member 2 [Source:HGNC Symbol;Acc:HGNC:23198]
ADAMTS16	ADAM metallopeptidase with thrombospondin type 1 motif 16	enzyme	M12: Astacin/Adamalysin	ENSCDRG00005004962	ENSCDRG00005004962	nan
PLK2	polo like kinase 2	enzyme	Polo-like kinase (PLK) family	ENSCDRG00005005540	PLK2	polo like kinase 2 [Source:NCBI gene;Acc:105084720]
GZMA	granzyme A	enzyme	S1: Chymotrypsin	ENSCDRG00005010264	GZMA	granzyme A-like [Source:NCBI gene;Acc:105087148]
PIK3R1	phosphoinositide-3-kinase regulatory subunit 1	enzyme	Phosphatidylinositol kinases	ENSCDRG00005004828	PIK3R1	phosphoinositide-3-kinase regulatory subunit 1 [Source:NCBI gene;Acc:105084758]
ADAMTS19	ADAM metallopeptidase with thrombospondin type 1 motif 19	enzyme	M12: Astacin/Adamalysin	ENSCDRG00005002758	ADAMTS19	ADAM metallopeptidase with thrombospondin type 1 motif 19 [Source:HGNC Symbol;Acc:HGNC:17111]
MYLK4	myosin light chain kinase family member 4	enzyme	Myosin Light Chain Kinase (MLCK) family	ENSCDRG00005014815	MYLK4	myosin light chain kinase family member 4 [Source:NCBI gene;Acc:105086549]
PLA2G7	phospholipase A2 group VII	enzyme	Hydrolases	ENSCDRG00005017578	PLA2G7	phospholipase A2 group VII [Source:HGNC Symbol;Acc:HGNC:9040]
TTBK1	tau tubulin kinase 1	enzyme	Tau tubulin kinase (TTBK) family	ENSCDRG00005013065	TTBK1	tau tubulin kinase 1 [Source:HGNC Symbol;Acc:HGNC:19140]
CYP39A1	cytochrome P450 family 39 subfamily A member 1	enzyme	CYP39, CYP46 and CYP51 families	ENSCDRG00005017415	CYP39A1	cytochrome P450 family 39 subfamily A member 1 [Source:HGNC Symbol;Acc:HGNC:17449]
TLK2	tousled like kinase 2	enzyme	Tousled-like kinase (TLK) family	ENSCDRG00005021677	TLK2	tousled like kinase 2 [Source:HGNC Symbol;Acc:HGNC:11842]
CASK	calcium/calmodulin dependent serine protein kinase	enzyme	CASK family	ENSCDRG00005020425	CASK	calcium/calmodulin dependent serine protein kinase [Source:HGNC Symbol;Acc:HGNC:1497]
KDM6A	lysine demethylase 6A	enzyme	1.14.11.- Histone demethylases	ENSCDRG00005020633	ENSCDRG00005020633	lysine demethylase 6A [Source:HGNC Symbol;Acc:HGNC:12637]
HDAC8	histone deacetylase 8	enzyme	3.5.1.- Histone deacetylases (HDACs)	ENSCDRG00005010238	ENSCDRG00005010238	nan
TAF1	TATA-box binding protein associated factor 1	enzyme	TAF1 family	ENSCDRG00005017651	ENSCDRG00005017651	nan
FBXO10	F-box protein 10	enzyme	2.1.1.- Protein arginine N-methyltransferases	ENSCDRG00005001052	FBXO10	F-box protein 10 [Source:HGNC Symbol;Acc:HGNC:13589]
AOPEP	aminopeptidase O (putative)	enzyme	M1: Aminopeptidase N	ENSCDRG00005018584	AOPEP	aminopeptidase O (putative) [Source:HGNC Symbol;Acc:HGNC:1361]
UGCG	UDP-glucose ceramide glucosyltransferase	enzyme	Ceramide glucosyltransferase	ENSCDRG00005006026	UGCG	UDP-glucose ceramide glucosyltransferase [Source:NCBI gene;Acc:105096380]
PTGES2	prostaglandin E synthase 2	enzyme	Prostaglandin synthases	ENSCDRG00005010746	PTGES2	prostaglandin E synthase 2 [Source:HGNC Symbol;Acc:HGNC:17822]
PTGES	prostaglandin E synthase	enzyme	Prostaglandin synthases	ENSCDRG00005000446	PTGES	prostaglandin E synthase [Source:NCBI gene;Acc:105092543]
INPP5E	inositol polyphosphate-5-phosphatase E	enzyme	Inositol polyphosphate phosphatases	ENSCDRG00005001361	INPP5E	inositol polyphosphate-5-phosphatase E [Source:HGNC Symbol;Acc:HGNC:21474]
CAMK2G	calcium/calmodulin dependent protein kinase II gamma	enzyme	CAMK2 family	ENSCDRG00005017107	CAMK2G	calcium/calmodulin dependent protein kinase II gamma [Source:HGNC Symbol;Acc:HGNC:1463]
CYP17A1	cytochrome P450 family 17 subfamily A member 1	enzyme	CYP11, CYP17, CYP19, CYP20 and CYP21 families	ENSCDRG00005013042	CYP17A1	steroid 17-alpha-hydroxylase/17,20 lyase [Source:NCBI gene;Acc:105095024]
GSTO1	glutathione S-transferase omega 1	enzyme	2.5.1.18 Glutathione transferases	ENSCDRG00005008349	GSTO1	glutathione S-transferase omega 1 [Source:NCBI gene;Acc:105095004]
ADAM12	ADAM metallopeptidase domain 12	enzyme	M12: Astacin/Adamalysin	ENSCDRG00005004626	ADAM12	ADAM metallopeptidase domain 12 [Source:HGNC Symbol;Acc:HGNC:190]
PAK1	p21 (RAC1) activated kinase 1	enzyme	PAKA subfamily	ENSCDRG00005005198	PAK1	p21 (RAC1) activated kinase 1 [Source:HGNC Symbol;Acc:HGNC:8590]
ATM	ATM serine/threonine kinase	enzyme	Other PIKK family kinases	ENSCDRG00005021893	ATM	ATM serine/threonine kinase [Source:NCBI gene;Acc:105096603]
ST14	ST14 transmembrane serine protease matriptase	enzyme	S1: Chymotrypsin	ENSCDRG00005010957	ST14	suppression of tumorigenicity 14 [Source:HGNC Symbol;Acc:HGNC:11344]
ADAM33	ADAM metallopeptidase domain 33	enzyme	M12: Astacin/Adamalysin	ENSCDRG00005011259	ADAM33	ADAM metallopeptidase domain 33 [Source:HGNC Symbol;Acc:HGNC:15478]
PLCH2	phospholipase C eta 2	enzyme	Phosphoinositide-specific phospholipase C	ENSCDRG00005012801	PLCH2	phospholipase C eta 2 [Source:HGNC Symbol;Acc:HGNC:29037]
CHEK1	checkpoint kinase 1	enzyme	CHK1 subfamily	ENSCDRG00005017226	CHEK1	checkpoint kinase 1 [Source:NCBI gene;Acc:105094454]
PLCB3	phospholipase C beta 3	enzyme	Phosphoinositide-specific phospholipase C	ENSCDRG00005018129	PLCB3	phospholipase C beta 3 [Source:NCBI gene;Acc:105101545]
TAOK2	TAO kinase 2	enzyme	TAO subfamily	ENSCDRG00005010569	TAOK2	TAO kinase 2 [Source:NCBI gene;Acc:105102758]
MMP3	matrix metallopeptidase 3	enzyme	M10: Matrix metallopeptidase	ENSCDRG00005001425	MMP3	stromelysin-1-like [Source:NCBI gene;Acc:105087168]
LATS2	large tumor suppressor kinase 2	enzyme	NDR family	ENSCDRG00005017071	LATS2	large tumor suppressor kinase 2 [Source:HGNC Symbol;Acc:HGNC:6515]
CNDP1	carnosine dipeptidase 1	enzyme	M20: Carnosine dipeptidase	ENSCDRG00005011713	CNDP1	carnosine dipeptidase 1 [Source:NCBI gene;Acc:105105074]
PIP4K2A	phosphatidylinositol-5-phosphate 4-kinase type 2 alpha	enzyme	Phosphatidylinositol phosphate kinases	ENSCDRG00005018006	PIP4K2A	phosphatidylinositol-5-phosphate 4-kinase type 2 alpha [Source:NCBI gene;Acc:105084907]
TWF1	twinfilin actin binding protein 1	enzyme	Twinfilin subfamily	ENSCDRG00005003599	TWF1	twinfilin actin binding protein 1 [Source:NCBI gene;Acc:105097092]
CSNK1G3	casein kinase 1 gamma 3	enzyme	Casein kinase 1 (CK1) family	ENSCDRG00005004199	CSNK1G3	casein kinase 1 gamma 3 [Source:HGNC Symbol;Acc:HGNC:2456]
ADAMTS12	ADAM metallopeptidase with thrombospondin type 1 motif 12	enzyme	M12: Astacin/Adamalysin	ENSCDRG00005002046	ADAMTS12	ADAM metallopeptidase with thrombospondin type 1 motif 12 [Source:HGNC Symbol;Acc:HGNC:14605]
NEK7	NIMA related kinase 7	enzyme	NIMA (never in mitosis gene a)- related kinase (NEK) family	ENSCDRG00005012295	NEK7	NIMA related kinase 7 [Source:NCBI gene;Acc:105090827]
FER	FER tyrosine kinase	enzyme	Fer family	ENSCDRG00005008331	FER	FER tyrosine kinase [Source:NCBI gene;Acc:105095395]
ADAM8	ADAM metallopeptidase domain 8	enzyme	M12: Astacin/Adamalysin	ENSCDRG00005002413	ENSCDRG00005002413	nan
INPP1	inositol polyphosphate-1-phosphatase	enzyme	Inositol polyphosphate phosphatases	ENSCDRG00005007903	INPP1	inositol polyphosphate-1-phosphatase [Source:NCBI gene;Acc:105099189]
ADAM17	ADAM metallopeptidase domain 17	enzyme	M12: Astacin/Adamalysin	ENSCDRG00005021400	ADAM17	ADAM metallopeptidase domain 17 [Source:HGNC Symbol;Acc:HGNC:195]
TDO2	tryptophan 2,3-dioxygenase	enzyme	1.13.11.- Dioxygenases	ENSCDRG00005006542	TDO2	tryptophan 2,3-dioxygenase [Source:NCBI gene;Acc:105101186]
PDK1	pyruvate dehydrogenase kinase 1	enzyme	PDHK family	ENSCDRG00005000974	PDK1	pyruvate dehydrogenase kinase 1 [Source:HGNC Symbol;Acc:HGNC:8809]
PDE3B	phosphodiesterase 3B	enzyme	Phosphodiesterases, 3',5'-cyclic nucleotide (PDEs)	ENSCDRG00005017202	PDE3B	phosphodiesterase 3B [Source:HGNC Symbol;Acc:HGNC:8779]
UHMK1	U2AF homology motif kinase 1	enzyme	Other-unique family	ENSCDRG00005003824	UHMK1	U2AF homology motif kinase 1 [Source:HGNC Symbol;Acc:HGNC:19683]
SUV39H2	suppressor of variegation 3-9 homolog 2	enzyme	2.1.1.43 Histone methyltransferases (HMTs)	ENSCDRG00005020162	SUV39H2	suppressor of variegation 3-9 homolog 2 [Source:NCBI gene;Acc:105104521]
CAMK4	calcium/calmodulin dependent protein kinase IV	enzyme	CAMK1 family	ENSCDRG00005007383	CAMK4	calcium/calmodulin dependent protein kinase IV [Source:NCBI gene;Acc:105095388]
GGPS1	geranylgeranyl diphosphate synthase 1	enzyme	Lanosterol biosynthesis pathway	ENSCDRG00005007164	GGPS1	geranylgeranyl diphosphate synthase 1 [Source:NCBI gene;Acc:105088831]
STK32B	serine/threonine kinase 32B	enzyme	YANK family	ENSCDRG00005000325	STK32B	serine/threonine kinase 32B [Source:HGNC Symbol;Acc:HGNC:14217]
CPB1	carboxypeptidase B1	enzyme	M14: Carboxypeptidase A	ENSCDRG00005013895	CPB1	carboxypeptidase B1 [Source:HGNC Symbol;Acc:HGNC:2299]
TMPRSS11D	transmembrane serine protease 11D	enzyme	S1: Chymotrypsin	ENSCDRG00005017168	TMPRSS11D	transmembrane serine protease 11D [Source:NCBI gene;Acc:105101506]
DDAH1	dimethylarginine dimethylaminohydrolase 1	enzyme	Dimethylarginine dimethylaminohydrolases	ENSCDRG00005011995	DDAH1	dimethylarginine dimethylaminohydrolase 1 [Source:HGNC Symbol;Acc:HGNC:2715]
OTULIN	OTU deubiquitinase with linear linkage specificity	enzyme	C101: OTULIN peptidase	ENSCDRG00005002724	OTULIN	OTU deubiquitinase with linear linkage specificity [Source:HGNC Symbol;Acc:HGNC:25118]
CERS3	ceramide synthase 3	enzyme	Ceramide synthase	ENSCDRG00005018454	CERS3	ceramide synthase 3 [Source:HGNC Symbol;Acc:HGNC:23752]
PRKCA	protein kinase C alpha	enzyme	Delta subfamily	ENSCDRG00005020399	PRKCA	protein kinase C alpha [Source:NCBI gene;Acc:105092299]
LRRK1	leucine rich repeat kinase 1	enzyme	Leucine-rich repeat kinase (LRRK) family	ENSCDRG00005018052	LRRK1	leucine rich repeat kinase 1 [Source:NCBI gene;Acc:105093454]
UCHL1	ubiquitin C-terminal hydrolase L1	enzyme	C12: Ubiquitin C-terminal hydrolase	ENSCDRG00005008827	UCHL1	ubiquitin C-terminal hydrolase L1 [Source:HGNC Symbol;Acc:HGNC:12513]
TNIK	TRAF2 and NCK interacting kinase	enzyme	MSN subfamily	ENSCDRG00005005860	TNIK	TRAF2 and NCK interacting kinase [Source:HGNC Symbol;Acc:HGNC:30765]
OBSCN	obscurin, cytoskeletal calmodulin and titin-interacting RhoGEF	enzyme	Trio family	ENSCDRG00005006705	ENSCDRG00005006705	nan
PDE1C	phosphodiesterase 1C	enzyme	Phosphodiesterases, 3',5'-cyclic nucleotide (PDEs)	ENSCDRG00005003038	PDE1C	phosphodiesterase 1C [Source:NCBI gene;Acc:105095855]
ADAMTS1	ADAM metallopeptidase with thrombospondin type 1 motif 1	enzyme	M12: Astacin/Adamalysin	ENSCDRG00005000833	ADAMTS1	ADAM metallopeptidase with thrombospondin type 1 motif 1 [Source:HGNC Symbol;Acc:HGNC:217]
ADAMTS5	ADAM metallopeptidase with thrombospondin type 1 motif 5	enzyme	M12: Astacin/Adamalysin	ENSCDRG00005000852	ADAMTS5	ADAM metallopeptidase with thrombospondin type 1 motif 5 [Source:HGNC Symbol;Acc:HGNC:221]
CYP2U1	cytochrome P450 family 2 subfamily U member 1	enzyme	CYP2 family	ENSCDRG00005012785	CYP2U1	cytochrome P450 2U1 [Source:NCBI gene;Acc:105105287]
CDK19	cyclin dependent kinase 19	enzyme	CDK8 subfamily	ENSCDRG00005004310	CDK19	cyclin dependent kinase 19 [Source:NCBI gene;Acc:105097099]
TTN	titin	enzyme	Myosin Light Chain Kinase (MLCK) family	ENSCDRG00005003286	TTN	titin [Source:HGNC Symbol;Acc:HGNC:12403]
KDM8	lysine demethylase 8	enzyme	1.14.11.- Histone demethylases	ENSCDRG00005005397	KDM8	lysine demethylase 8 [Source:HGNC Symbol;Acc:HGNC:25840]
ADCY8	adenylate cyclase 8	enzyme	Adenylyl cyclases (ACs)	ENSCDRG00005005520	ADCY8	adenylate cyclase 8 [Source:HGNC Symbol;Acc:HGNC:239]
MMP16	matrix metallopeptidase 16	enzyme	M10: Matrix metallopeptidase	ENSCDRG00005017987	MMP16	matrix metallopeptidase 16 [Source:NCBI gene;Acc:105089491]
ADK	adenosine kinase	enzyme	Adenosine turnover	ENSCDRG00005017927	ADK	adenosine kinase [Source:NCBI gene;Acc:105092448]
ADAMTS3	ADAM metallopeptidase with thrombospondin type 1 motif 3	enzyme	M12: Astacin/Adamalysin	ENSCDRG00005019712	ADAMTS3	ADAM metallopeptidase with thrombospondin type 1 motif 3 [Source:NCBI gene;Acc:105091252]
KAT6B	lysine acetyltransferase 6B	enzyme	2.3.1.48 Histone acetyltransferases (HATs)	ENSCDRG00005018083	KAT6B	lysine acetyltransferase 6B [Source:HGNC Symbol;Acc:HGNC:17582]
SAMD8	sterile alpha motif domain containing 8	enzyme	Sphingomyelin synthase	ENSCDRG00005018320	SAMD8	sterile alpha motif domain containing 8 [Source:HGNC Symbol;Acc:HGNC:26320]
MAPK13	mitogen-activated protein kinase 13	enzyme	p38 subfamily	ENSCDRG00005010926	MAPK13	mitogen-activated protein kinase 13 [Source:NCBI gene;Acc:105101337]
ATAD2	ATPase family AAA domain containing 2	enzyme	3.6.1.3 ATPases	ENSCDRG00005003654	ATAD2	ATPase family AAA domain containing 2 [Source:HGNC Symbol;Acc:HGNC:30123]
PHKG2	phosphorylase kinase catalytic subunit gamma 2	enzyme	Phosphorylase kinase (PHK) family	ENSCDRG00005010871	PHKG2	phosphorylase kinase catalytic subunit gamma 2 [Source:NCBI gene;Acc:105102728]
BUB1B	BUB1 mitotic checkpoint serine/threonine kinase B	enzyme	Bub family	ENSCDRG00005001001	ENSCDRG00005001001	BUB1 mitotic checkpoint serine/threonine kinase B [Source:NCBI gene;Acc:105096887]
PDE6D	phosphodiesterase 6D	enzyme	Phosphodiesterases, 3',5'-cyclic nucleotide (PDEs)	ENSCDRG00005006577	PDE6D	phosphodiesterase 6D [Source:HGNC Symbol;Acc:HGNC:8788]
SMG1	SMG1 nonsense mediated mRNA decay associated PI3K related kinase	enzyme	SMG1 subfamily	ENSCDRG00005016153	SMG1	SMG1 nonsense mediated mRNA decay associated PI3K related kinase [Source:HGNC Symbol;Acc:HGNC:30045]
MMP14	matrix metallopeptidase 14	enzyme	M10: Matrix metallopeptidase	ENSCDRG00005007391	MMP14	matrix metallopeptidase 14 [Source:HGNC Symbol;Acc:HGNC:7160]
DYRK1A	dual specificity tyrosine phosphorylation regulated kinase 1A	enzyme	Dyrk1 subfamily	ENSCDRG00005007271	DYRK1A	dual specificity tyrosine phosphorylation regulated kinase 1A [Source:HGNC Symbol;Acc:HGNC:3091]
BRAF	B-Raf proto-oncogene, serine/threonine kinase	enzyme	RAF family	ENSCDRG00005004131	BRAF	B-Raf proto-oncogene, serine/threonine kinase [Source:HGNC Symbol;Acc:HGNC:1097]
PAFAH2	platelet activating factor acetylhydrolase 2	enzyme	Phospholipase A<sub>2</sub>	ENSCDRG00005005371	PAFAH2	platelet activating factor acetylhydrolase 2 [Source:NCBI gene;Acc:105100670]
HPD	4-hydroxyphenylpyruvate dioxygenase	enzyme	1.-.-.- Oxidoreductases	ENSCDRG00005019760	HPD	4-hydroxyphenylpyruvate dioxygenase [Source:HGNC Symbol;Acc:HGNC:5147]
XDH	xanthine dehydrogenase	enzyme	1.-.-.- Oxidoreductases	ENSCDRG00005014145	XDH	xanthine dehydrogenase [Source:NCBI gene;Acc:105095605]
CPA2	carboxypeptidase A2	enzyme	M14: Carboxypeptidase A	ENSCDRG00005000890	CPA2	carboxypeptidase A2 [Source:NCBI gene;Acc:105085436]
CPA5	carboxypeptidase A5	enzyme	M14: Carboxypeptidase A	ENSCDRG00005001058	CPA5	carboxypeptidase A5 [Source:NCBI gene;Acc:105085386]
PLA2G2F	phospholipase A2 group IIF	enzyme	Phospholipase A<sub>2</sub>	ENSCDRG00005008458	PLA2G2F	phospholipase A2 group IIF [Source:HGNC Symbol;Acc:HGNC:30040]
CDA	cytidine deaminase	enzyme	Pyrimidine salvage	ENSCDRG00005008712	CDA	cytidine deaminase [Source:NCBI gene;Acc:105088854]
PINK1	PTEN induced kinase 1	enzyme	NKF2 family	ENSCDRG00005008763	PINK1	PTEN induced kinase 1 [Source:HGNC Symbol;Acc:HGNC:14581]
ADAMTS4	ADAM metallopeptidase with thrombospondin type 1 motif 4	enzyme	M12: Astacin/Adamalysin	ENSCDRG00005016944	ADAMTS4	ADAM metallopeptidase with thrombospondin type 1 motif 4 [Source:NCBI gene;Acc:105100107]
SYNJ1	synaptojanin 1	enzyme	Inositol polyphosphate phosphatases	ENSCDRG00005002057	SYNJ1	synaptojanin 1 [Source:HGNC Symbol;Acc:HGNC:11503]
GART	phosphoribosylglycinamide formyltransferase, phosphoribosylglycinamide synthetase, phosphoribosylaminoimidazole synthetase	enzyme	2.1.2.- Hydroxymethyl-, formyl- and related transferases	ENSCDRG00005002522	GART	phosphoribosylglycinamide formyltransferase, phosphoribosylglycinamide synthetase, phosphoribosylaminoimidazole synthetase [Source:NCBI gene;Acc:105089861]
CBR1	carbonyl reductase 1	enzyme	Prostaglandin synthases	ENSCDRG00005003062	ENSCDRG00005003062	carbonyl reductase [NADPH] 1 [Source:NCBI gene;Acc:105089844]
PLA2G4D	phospholipase A2 group IVD	enzyme	Phospholipase A<sub>2</sub>	ENSCDRG00005018595	PLA2G4D	phospholipase A2 group IVD [Source:HGNC Symbol;Acc:HGNC:30038]
PADI4	peptidyl arginine deiminase 4	enzyme	3.5.3.15 Peptidyl arginine deiminases (PADI)	ENSCDRG00005005408	PADI4	peptidyl arginine deiminase 4 [Source:HGNC Symbol;Acc:HGNC:18368]
C1R	complement C1r	enzyme	S1: Chymotrypsin	ENSCDRG00005019633	C1R	complement C1r [Source:NCBI gene;Acc:105098187]
ACE	angiotensin I converting enzyme	enzyme	M2: Angiotensin-converting (ACE and ACE2)	ENSCDRG00005021606	ACE	angiotensin-converting enzyme-like [Source:NCBI gene;Acc:105090416]
PSKH1	protein serine kinase H1	enzyme	PSK family	ENSCDRG00005015034	PSKH1	protein serine kinase H1 [Source:NCBI gene;Acc:105088425]
KALRN	kalirin RhoGEF kinase	enzyme	Trio family	ENSCDRG00005020989	KALRN	kalirin RhoGEF kinase [Source:HGNC Symbol;Acc:HGNC:4814]
PDE9A	phosphodiesterase 9A	enzyme	Phosphodiesterases, 3',5'-cyclic nucleotide (PDEs)	ENSCDRG00005011646	PDE9A	phosphodiesterase 9A [Source:NCBI gene;Acc:105105843]
CBS	cystathionine beta-synthase	enzyme	Hydrogen sulphide synthesis	ENSCDRG00005012447	ENSCDRG00005012447	nan
LSS	lanosterol synthase	enzyme	Lanosterol biosynthesis pathway	ENSCDRG00005021905	LSS	lanosterol synthase [Source:NCBI gene;Acc:105090588]
PRMT2	protein arginine methyltransferase 2	enzyme	2.1.1.- Protein arginine N-methyltransferases	ENSCDRG00005006179	ENSCDRG00005006179	nan
ADAMTS13	ADAM metallopeptidase with thrombospondin type 1 motif 13	enzyme	M12: Astacin/Adamalysin	ENSCDRG00005000643	#N/A	#N/A
HIPK4	homeodomain interacting protein kinase 4	enzyme	HIPK subfamily	ENSCDRG00005010731	HIPK4	homeodomain interacting protein kinase 4 [Source:HGNC Symbol;Acc:HGNC:19007]
PKN3	protein kinase N3	enzyme	Protein kinase N (PKN) family	ENSCDRG00005001760	PKN3	protein kinase N3 [Source:HGNC Symbol;Acc:HGNC:17999]
BRSK1	BR serine/threonine kinase 1	enzyme	BRSK subfamily	ENSCDRG00005007267	BRSK1	BR serine/threonine kinase 1 [Source:HGNC Symbol;Acc:HGNC:18994]
TAOK1	TAO kinase 1	enzyme	TAO subfamily	ENSCDRG00005010067	TAOK1	TAO kinase 1 [Source:NCBI gene;Acc:105088156]
SIK3	SIK family kinase 3	enzyme	QIK subfamily	ENSCDRG00005017857	SIK3	SIK family kinase 3 [Source:NCBI gene;Acc:105090193]
NEK8	NIMA related kinase 8	enzyme	NIMA (never in mitosis gene a)- related kinase (NEK) family	ENSCDRG00005011984	NEK8	NIMA related kinase 8 [Source:HGNC Symbol;Acc:HGNC:13387]
PCSK7	proprotein convertase subtilisin/kexin type 7	enzyme	S8: Subtilisin	ENSCDRG00005018259	PCSK7	proprotein convertase subtilisin/kexin type 7 [Source:NCBI gene;Acc:105090191]
FDPS	farnesyl diphosphate synthase	enzyme	Lanosterol biosynthesis pathway	ENSCDRG00005008269	FDPS	farnesyl diphosphate synthase [Source:NCBI gene;Acc:105088801]
CYP3A4	cytochrome P450 family 3 subfamily A member 4	enzyme	CYP3 family	ENSCDRG00005010591	ENSCDRG00005010591	nan
CYP3A7	cytochrome P450 family 3 subfamily A member 7	enzyme	CYP3 family	ENSCDRG00005010591	ENSCDRG00005010591	nan
NAPEPLD	N-acyl phosphatidylethanolamine phospholipase D	enzyme	<i>N</i>-Acylethanolamine turnover	ENSCDRG00005015831	NAPEPLD	N-acyl phosphatidylethanolamine phospholipase D [Source:HGNC Symbol;Acc:HGNC:21683]
PLCD3	phospholipase C delta 3	enzyme	Phosphoinositide-specific phospholipase C	ENSCDRG00005004860	PLCD3	phospholipase C delta 3 [Source:HGNC Symbol;Acc:HGNC:9061]
ALOX15	arachidonate 15-lipoxygenase	enzyme	Lipoxygenases	ENSCDRG00005017756	ALOX15	arachidonate 15-lipoxygenase [Source:NCBI gene;Acc:105106001]
ADCY9	adenylate cyclase 9	enzyme	Adenylyl cyclases (ACs)	ENSCDRG00005007726	ADCY9	adenylate cyclase 9 [Source:NCBI gene;Acc:105099828]
RPS6KA4	ribosomal protein S6 kinase A4	enzyme	MSK subfamily	ENSCDRG00005017479	RPS6KA4	ribosomal protein S6 kinase A4 [Source:NCBI gene;Acc:105101551]
PLPP3	phospholipid phosphatase 3	enzyme	Lipid phosphate phosphatases	ENSCDRG00005013344	ENSCDRG00005013344	phospholipid phosphatase 3 [Source:NCBI gene;Acc:105092818]
PRKAA2	protein kinase AMP-activated catalytic subunit alpha 2	enzyme	AMPK subfamily	ENSCDRG00005013407	PRKAA2	protein kinase AMP-activated catalytic subunit alpha 2 [Source:HGNC Symbol;Acc:HGNC:9377]
JAK1	Janus kinase 1	enzyme	Janus kinase (JakA) family	ENSCDRG00005004601	JAK1	Janus kinase 1 [Source:HGNC Symbol;Acc:HGNC:6190]
CTRC	chymotrypsin C	enzyme	S1: Chymotrypsin	ENSCDRG00005019769	CTRC	chymotrypsin C [Source:NCBI gene;Acc:105107054]
TSSK3	testis specific serine kinase 3	enzyme	Testis specific kinase (TSSK) family	ENSCDRG00005020616	TSSK3	testis specific serine kinase 3 [Source:NCBI gene;Acc:105085789]
USP1	ubiquitin specific peptidase 1	enzyme	C19: Ubiquitin-specific protease	ENSCDRG00005016803	USP1	ubiquitin specific peptidase 1 [Source:HGNC Symbol;Acc:HGNC:12607]
PKDCC	protein kinase domain containing, cytoplasmic	enzyme	SgK493 family	ENSCDRG00005019651	PKDCC	protein kinase domain containing, cytoplasmic [Source:HGNC Symbol;Acc:HGNC:25123]
MAPKAPK2	MAPK activated protein kinase 2	enzyme	MAPKAPK subfamily	ENSCDRG00005009827	MAPKAPK2	MAPK activated protein kinase 2 [Source:HGNC Symbol;Acc:HGNC:6887]
CAPN2	calpain 2	enzyme	C2: Calpain	ENSCDRG00005019228	CAPN2	calpain 2 [Source:HGNC Symbol;Acc:HGNC:1479]
COQ8A	coenzyme Q8A	enzyme	ABC1-B subfamily	ENSCDRG00005004392	COQ8A	coenzyme Q8A [Source:NCBI gene;Acc:105099565]
SGPP2	sphingosine-1-phosphate phosphatase 2	enzyme	Sphingosine 1-phosphate phosphatase	ENSCDRG00005002215	SGPP2	sphingosine-1-phosphate phosphatase 2 [Source:HGNC Symbol;Acc:HGNC:19953]
HPGDS	hematopoietic prostaglandin D synthase	enzyme	Prostaglandin synthases	ENSCDRG00005009472	HPGDS	hematopoietic prostaglandin D synthase [Source:NCBI gene;Acc:105089526]
CTSS	cathepsin S	enzyme	C1: Papain	ENSCDRG00005017707	CTSS	cathepsin S [Source:NCBI gene;Acc:105103192]
PMVK	phosphomevalonate kinase	enzyme	Lanosterol biosynthesis pathway	ENSCDRG00005003806	PMVK	phosphomevalonate kinase [Source:NCBI gene;Acc:105089049]
HIPK1	homeodomain interacting protein kinase 1	enzyme	HIPK subfamily	ENSCDRG00005005505	HIPK1	homeodomain interacting protein kinase 1 [Source:HGNC Symbol;Acc:HGNC:19006]
STK36	serine/threonine kinase 36	enzyme	Unc-51-like kinase (ULK) family	ENSCDRG00005018460	STK36	serine/threonine kinase 36 [Source:HGNC Symbol;Acc:HGNC:17209]
NEK10	NIMA related kinase 10	enzyme	NIMA (never in mitosis gene a)- related kinase (NEK) family	ENSCDRG00005008796	NEK10	NIMA related kinase 10 [Source:HGNC Symbol;Acc:HGNC:18592]
HDAC11	histone deacetylase 11	enzyme	3.5.1.- Histone deacetylases (HDACs)	ENSCDRG00005004608	HDAC11	histone deacetylase 11 [Source:NCBI gene;Acc:105093074]
NUAK2	NUAK family kinase 2	enzyme	NuaK subfamily	ENSCDRG00005012604	NUAK2	NUAK family kinase 2 [Source:NCBI gene;Acc:105098633]
PRKCI	protein kinase C iota	enzyme	Iota subfamily	ENSCDRG00005005504	PRKCI	protein kinase C iota [Source:NCBI gene;Acc:105085957]
ADAMTS9	ADAM metallopeptidase with thrombospondin type 1 motif 9	enzyme	M12: Astacin/Adamalysin	ENSCDRG00005020777	ADAMTS9	ADAM metallopeptidase with thrombospondin type 1 motif 9 [Source:HGNC Symbol;Acc:HGNC:13202]
DCLK3	doublecortin like kinase 3	enzyme	DCAMKL family	ENSCDRG00005014456	DCLK3	doublecortin like kinase 3 [Source:NCBI gene;Acc:105090701]
ABHD6	abhydrolase domain containing 6, acylglycerol lipase	enzyme	2-Acylglycerol ester turnover	ENSCDRG00005019209	ABHD6	abhydrolase domain containing 6 [Source:NCBI gene;Acc:105089804]
CPA3	carboxypeptidase A3	enzyme	M14: Carboxypeptidase A	ENSCDRG00005013995	CPA3	carboxypeptidase A3 [Source:NCBI gene;Acc:105089508]
SNRK	SNF related kinase	enzyme	SNRK subfamily	ENSCDRG00005003529	SNRK	SNF related kinase [Source:HGNC Symbol;Acc:HGNC:30598]
BAP1	BRCA1 associated protein 1	enzyme	C12: Ubiquitin C-terminal hydrolase	ENSCDRG00005016383	BAP1	BRCA1 associated protein 1 [Source:NCBI gene;Acc:105093436]
PRKCD	protein kinase C delta	enzyme	Delta subfamily	ENSCDRG00005013096	PRKCD	protein kinase C delta [Source:HGNC Symbol;Acc:HGNC:9399]
SGMS2	sphingomyelin synthase 2	enzyme	Sphingomyelin synthase	ENSCDRG00005012842	SGMS2	sphingomyelin synthase 2 [Source:NCBI gene;Acc:105105285]
METAP1	methionyl aminopeptidase 1	enzyme	M24: Methionyl aminopeptidase	ENSCDRG00005006507	METAP1	methionyl aminopeptidase 1 [Source:HGNC Symbol;Acc:HGNC:15789]
APEH	acylaminoacyl-peptide hydrolase	enzyme	S9: Prolyl oligopeptidase	ENSCDRG00005005764	APEH	acylaminoacyl-peptide hydrolase [Source:NCBI gene;Acc:105087692]
CAMKV	CaM kinase like vesicle associated	enzyme	CAMK-unique family	ENSCDRG00005006662	CAMKV	CaM kinase like vesicle associated [Source:HGNC Symbol;Acc:HGNC:28788]
HPGD	15-hydroxyprostaglandin dehydrogenase	enzyme	Prostaglandin synthases	ENSCDRG00005011773	ENSCDRG00005011773	nan
PRMT9	protein arginine methyltransferase 9	enzyme	2.1.1.- Protein arginine N-methyltransferases	ENSCDRG00005019766	PRMT9	protein arginine methyltransferase 9 [Source:HGNC Symbol;Acc:HGNC:25099]
CASP3	caspase 3	enzyme	C14: Caspase	ENSCDRG00005015657	CASP3	caspase 3 [Source:NCBI gene;Acc:105084433]
ERAP1	endoplasmic reticulum aminopeptidase 1	enzyme	M1: Aminopeptidase N	ENSCDRG00005009185	ERAP1	endoplasmic reticulum aminopeptidase 1 [Source:HGNC Symbol;Acc:HGNC:18173]
ERAP2	endoplasmic reticulum aminopeptidase 2	enzyme	M1: Aminopeptidase N	ENSCDRG00005008923	ERAP2	endoplasmic reticulum aminopeptidase 2 [Source:HGNC Symbol;Acc:HGNC:29499]
KLKB1	kallikrein B1	enzyme	S1: Chymotrypsin	ENSCDRG00005011771	KLKB1	kallikrein B1 [Source:HGNC Symbol;Acc:HGNC:6371]
CGAS	cyclic GMP-AMP synthase	enzyme	Cyclic GMP-AMP synthase	ENSCDRG00005011491	CGAS	cyclic GMP-AMP synthase [Source:HGNC Symbol;Acc:HGNC:21367]
DAGLB	diacylglycerol lipase beta	enzyme	2-Acylglycerol ester turnover	ENSCDRG00005015756	DAGLB	diacylglycerol lipase beta [Source:HGNC Symbol;Acc:HGNC:28923]
STK17A	serine/threonine kinase 17a	enzyme	Death-associated kinase (DAPK) family	ENSCDRG00005010848	ENSCDRG00005010848	nan
CTSB	cathepsin B	enzyme	C1: Papain	ENSCDRG00005010951	CTSB	cathepsin B [Source:NCBI gene;Acc:105101888]
ADCY1	adenylate cyclase 1	enzyme	Adenylyl cyclases (ACs)	ENSCDRG00005010724	ENSCDRG00005010724	nan
PHKG1	phosphorylase kinase catalytic subunit gamma 1	enzyme	Phosphorylase kinase (PHK) family	ENSCDRG00005016062	PHKG1	phosphorylase kinase catalytic subunit gamma 1 [Source:NCBI gene;Acc:105089705]
NOS3	nitric oxide synthase 3	enzyme	Nitric oxide synthases	ENSCDRG00005008336	ENSCDRG00005008336	nan
CDK5	cyclin dependent kinase 5	enzyme	CDK5 subfamily	ENSCDRG00005009004	CDK5	cyclin dependent kinase 5 [Source:NCBI gene;Acc:105105662]
CPA6	carboxypeptidase A6	enzyme	M14: Carboxypeptidase A	ENSCDRG00005021051	CPA6	carboxypeptidase A6 [Source:NCBI gene;Acc:105096937]
KDM1B	lysine demethylase 1B	enzyme	1.14.11.- Histone demethylases	ENSCDRG00005017965	KDM1B	lysine demethylase 1B [Source:HGNC Symbol;Acc:HGNC:21577]
CYBB	cytochrome b-245 beta chain	enzyme	NADPH oxidases	ENSCDRG00005019198	CYBB	cytochrome b-245 heavy chain [Source:NCBI gene;Acc:105101594]
WNK2	WNK lysine deficient protein kinase 2	enzyme	Wnk family	ENSCDRG00005010400	WNK2	WNK lysine deficient protein kinase 2 [Source:HGNC Symbol;Acc:HGNC:14542]
MELK	maternal embryonic leucine zipper kinase	enzyme	MELK subfamily	ENSCDRG00005002575	MELK	maternal embryonic leucine zipper kinase [Source:NCBI gene;Acc:105102269]
INPPL1	inositol polyphosphate phosphatase like 1	enzyme	Inositol polyphosphate phosphatases	ENSCDRG00005000881	INPPL1	inositol polyphosphate phosphatase like 1 [Source:HGNC Symbol;Acc:HGNC:6080]
FAAH2	fatty acid amide hydrolase 2	enzyme	<i>N</i>-Acylethanolamine turnover	ENSCDRG00005011750	FAAH2	fatty acid amide hydrolase 2 [Source:HGNC Symbol;Acc:HGNC:26440]
NSD1	nuclear receptor binding SET domain protein 1	enzyme	2.1.1.43 Histone methyltransferases (HMTs)	ENSCDRG00005009974	NSD1	nuclear receptor binding SET domain protein 1 [Source:HGNC Symbol;Acc:HGNC:14234]
STK32C	serine/threonine kinase 32C	enzyme	YANK family	ENSCDRG00005002957	STK32C	serine/threonine kinase 32C [Source:HGNC Symbol;Acc:HGNC:21332]
CASP7	caspase 7	enzyme	C14: Caspase	ENSCDRG00005021128	CASP7	caspase 7 [Source:NCBI gene;Acc:105091687]
ADAMTS15	ADAM metallopeptidase with thrombospondin type 1 motif 15	enzyme	M12: Astacin/Adamalysin	ENSCDRG00005011889	ADAMTS15	ADAM metallopeptidase with thrombospondin type 1 motif 15 [Source:HGNC Symbol;Acc:HGNC:16305]
BRD7	bromodomain containing 7	enzyme	Bromodomain kinase (BRDK) family	ENSCDRG00005000831	BRD7	bromodomain containing 7 [Source:HGNC Symbol;Acc:HGNC:14310]
ASPG	asparaginase	enzyme	3.1.1.- Carboxylic Ester Hydrolases	ENSCDRG00005008457	ASPG	asparaginase [Source:NCBI gene;Acc:105105993]
SENP8	SUMO peptidase family member, NEDD8 specific	enzyme	C48: Ulp1 endopeptidase	ENSCDRG00005011655	SENP8	SUMO peptidase family member, NEDD8 specific [Source:HGNC Symbol;Acc:HGNC:22992]
SGPL1	sphingosine-1-phosphate lyase 1	enzyme	Sphingosine 1-phosphate lyase	ENSCDRG00005009700	SGPL1	sphingosine-1-phosphate lyase 1 [Source:NCBI gene;Acc:105099866]
SMPD1	sphingomyelin phosphodiesterase 1	enzyme	Sphingomyelin phosphodiesterase	ENSCDRG00005015860	SMPD1	sphingomyelin phosphodiesterase 1 [Source:NCBI gene;Acc:105097918]
ILK	integrin linked kinase	enzyme	ILK subfamily	ENSCDRG00005014817	ILK	integrin linked kinase [Source:NCBI gene;Acc:105097907]
MOGAT2	monoacylglycerol O-acyltransferase 2	enzyme	2.3.1.- Acyltransferases	ENSCDRG00005003678	MOGAT2	monoacylglycerol O-acyltransferase 2 [Source:HGNC Symbol;Acc:HGNC:23248]
WEE1	WEE1 G2 checkpoint kinase	enzyme	WEE family	ENSCDRG00005008090	WEE1	WEE1 G2 checkpoint kinase [Source:HGNC Symbol;Acc:HGNC:12761]
MAPK7	mitogen-activated protein kinase 7	enzyme	ERK subfamily	ENSCDRG00005017447	MAPK7	mitogen-activated protein kinase 7 [Source:HGNC Symbol;Acc:HGNC:6880]
PRKCB	protein kinase C beta	enzyme	Alpha subfamily	ENSCDRG00005004483	PRKCB	protein kinase C beta [Source:HGNC Symbol;Acc:HGNC:9395]
ANPEP	alanyl aminopeptidase, membrane	enzyme	M1: Aminopeptidase N	ENSCDRG00005020759	ANPEP	alanyl aminopeptidase, membrane [Source:NCBI gene;Acc:105094678]
PIP4K2C	phosphatidylinositol-5-phosphate 4-kinase type 2 gamma	enzyme	Phosphatidylinositol phosphate kinases	ENSCDRG00005019272	PIP4K2C	phosphatidylinositol-5-phosphate 4-kinase type 2 gamma [Source:HGNC Symbol;Acc:HGNC:23786]
CDK12	cyclin dependent kinase 12	enzyme	CRK7 subfamily	ENSCDRG00005004519	CDK12	cyclin dependent kinase 12 [Source:HGNC Symbol;Acc:HGNC:24224]
DPEP2	dipeptidase 2	enzyme	Leukotriene and lipoxin metabolism	ENSCDRG00005016754	DPEP2	dipeptidase 2-like [Source:NCBI gene;Acc:105088420]
RRM1	ribonucleotide reductase catalytic subunit M1	enzyme	1.17.4.1 Ribonucleoside-diphosphate reductases	ENSCDRG00005001431	RRM1	ribonucleotide reductase catalytic subunit M1 [Source:NCBI gene;Acc:105096519]
MMP26	matrix metallopeptidase 26	enzyme	M10: Matrix metallopeptidase	ENSCDRG00005001098	MMP26	matrix metallopeptidase 26 [Source:NCBI gene;Acc:105098043]
VKORC1	vitamin K epoxide reductase complex subunit 1	enzyme	1.-.-.- Oxidoreductases	ENSCDRG00005013244	VKORC1	vitamin K epoxide reductase complex subunit 1
CA4	carbonic anhydrase 4	enzyme	Carbonic anhydrases	ENSCDRG00005006611	CA4	carbonic anhydrase 4 [Source:NCBI gene;Acc:105097846]
MVD	mevalonate diphosphate decarboxylase	enzyme	Lanosterol biosynthesis pathway	ENSCDRG00005020571	MVD	mevalonate diphosphate decarboxylase [Source:HGNC Symbol;Acc:HGNC:7529]
RSKR	ribosomal protein S6 kinase related	enzyme	RSKR subfamily	ENSCDRG00005013678	RSKR	ribosomal protein S6 kinase related [Source:NCBI gene;Acc:105088181]
KMT2D	lysine methyltransferase 2D	enzyme	2.1.1.43 Histone methyltransferases (HMTs)	ENSCDRG00005006455	KMT2D	lysine methyltransferase 2D [Source:HGNC Symbol;Acc:HGNC:7133]
CYP2S1	cytochrome P450 family 2 subfamily S member 1	enzyme	CYP2 family	ENSCDRG00005014805	CYP2S1	cytochrome P450 family 2 subfamily S member 1 [Source:HGNC Symbol;Acc:HGNC:15654]
DAPK3	death associated protein kinase 3	enzyme	Death-associated kinase (DAPK) family	ENSCDRG00005004913	DAPK3	death associated protein kinase 3 [Source:HGNC Symbol;Acc:HGNC:2676]
KLK1	kallikrein 1	enzyme	S1: Chymotrypsin	ENSCDRG00005014393	KLK1	kallikrein 1 [Source:HGNC Symbol;Acc:HGNC:6357]
KLK4	kallikrein related peptidase 4	enzyme	S1: Chymotrypsin	ENSCDRG00005014534	KLK4	kallikrein related peptidase 4 [Source:NCBI gene;Acc:105100160]
KLK5	kallikrein related peptidase 5	enzyme	S1: Chymotrypsin	ENSCDRG00005014598	KLK5	kallikrein related peptidase 5 [Source:HGNC Symbol;Acc:HGNC:6366]
KLK6	kallikrein related peptidase 6	enzyme	S1: Chymotrypsin	ENSCDRG00005014634	KLK6	kallikrein related peptidase 6 [Source:NCBI gene;Acc:105100156]
ACER1	alkaline ceramidase 1	enzyme	Alkaline ceramidases	ENSCDRG00005021951	ACER1	alkaline ceramidase 1 [Source:NCBI gene;Acc:105091768]
CYP7A1	cytochrome P450 family 7 subfamily A member 1	enzyme	CYP5, CYP7 and CYP8 families	ENSCDRG00005020352	CYP7A1	cholesterol 7-alpha-monooxygenase [Source:NCBI gene;Acc:105093285]
ULK4	unc-51 like kinase 4	enzyme	Unc-51-like kinase (ULK) family	ENSCDRG00005020232	ULK4	unc-51 like kinase 4 [Source:HGNC Symbol;Acc:HGNC:15784]
NAALADL1	N-acetylated alpha-linked acidic dipeptidase like 1	enzyme	M28: Aminopeptidase Y	ENSCDRG00005011407	NAALADL1	N-acetylated alpha-linked acidic dipeptidase like 1 [Source:NCBI gene;Acc:105102621]
MAP4K2	mitogen-activated protein kinase kinase kinase kinase 2	enzyme	KHS subfamily	ENSCDRG00005013346	MAP4K2	mitogen-activated protein kinase kinase kinase kinase 2 [Source:HGNC Symbol;Acc:HGNC:6864]
PBK	PDZ binding kinase	enzyme	TOPK family	ENSCDRG00005019667	PBK	PDZ binding kinase [Source:HGNC Symbol;Acc:HGNC:18282]
PXK	PX domain containing serine/threonine kinase like	enzyme	Slob family	ENSCDRG00005019326	PXK	PX domain containing serine/threonine kinase like [Source:NCBI gene;Acc:105089806]
DEGS2	delta 4-desaturase, sphingolipid 2	enzyme	Sphingolipid &Delta;<sup>4</sup>-desaturase	ENSCDRG00005002441	DEGS2	delta 4-desaturase, sphingolipid 2 [Source:HGNC Symbol;Acc:HGNC:20113]
ATG4B	autophagy related 4B cysteine peptidase	enzyme	C54: Aut2 peptidase	ENSCDRG00005000273	ATG4B	autophagy related 4B cysteine peptidase [Source:HGNC Symbol;Acc:HGNC:20790]
MLKL	mixed lineage kinase domain like pseudokinase	enzyme	TKL-unique family	ENSCDRG00005013278	MLKL	mixed lineage kinase domain like pseudokinase [Source:NCBI gene;Acc:105094684]
BMP1	bone morphogenetic protein 1	enzyme	M12: Astacin/Adamalysin	ENSCDRG00005009906	BMP1	bone morphogenetic protein 1 [Source:HGNC Symbol;Acc:HGNC:1067]
FNTA	farnesyltransferase, CAAX box, alpha	enzyme	2.5.1.58 Protein farnesyltransferase	ENSCDRG00005018946	FNTA	farnesyltransferase, CAAX box, alpha [Source:HGNC Symbol;Acc:HGNC:3782]
ADAM9	ADAM metallopeptidase domain 9	enzyme	M12: Astacin/Adamalysin	ENSCDRG00005011143	ADAM9	ADAM metallopeptidase domain 9 [Source:NCBI gene;Acc:105105338]
ADAM18	ADAM metallopeptidase domain 18	enzyme	M12: Astacin/Adamalysin	ENSCDRG00005009541	ADAM18	ADAM metallopeptidase domain 18 [Source:HGNC Symbol;Acc:HGNC:196]
CA7	carbonic anhydrase 7	enzyme	Carbonic anhydrases	ENSCDRG00005007047	CA7	carbonic anhydrase 7 [Source:HGNC Symbol;Acc:HGNC:1381]
PLA2G4F	phospholipase A2 group IVF	enzyme	Phospholipase A<sub>2</sub>	ENSCDRG00005018547	PLA2G4F	phospholipase A2 group IVF [Source:HGNC Symbol;Acc:HGNC:27396]
INPP5D	inositol polyphosphate-5-phosphatase D	enzyme	Inositol polyphosphate phosphatases	ENSCDRG00005009359	INPP5D	inositol polyphosphate-5-phosphatase D [Source:NCBI gene;Acc:105105239]
MAP2K1	mitogen-activated protein kinase kinase 1	enzyme	STE7 family	ENSCDRG00005002580	MAP2K1	mitogen-activated protein kinase kinase 1 [Source:NCBI gene;Acc:105093267]
KLK7	kallikrein related peptidase 7	enzyme	S1: Chymotrypsin	ENSCDRG00005014676	KLK7	kallikrein related peptidase 7 [Source:NCBI gene;Acc:105100155]
CSNK1G1	casein kinase 1 gamma 1	enzyme	Casein kinase 1 (CK1) family	ENSCDRG00005000938	CSNK1G1	casein kinase 1 gamma 1 [Source:NCBI gene;Acc:105100524]
PCSK9	proprotein convertase subtilisin/kexin type 9	enzyme	S8: Subtilisin	ENSCDRG00005012635	PCSK9	proprotein convertase subtilisin/kexin type 9 [Source:NCBI gene;Acc:105092855]
STK32A	serine/threonine kinase 32A	enzyme	YANK family	ENSCDRG00005005822	STK32A	serine/threonine kinase 32A [Source:HGNC Symbol;Acc:HGNC:28317]
PTK2	protein tyrosine kinase 2	enzyme	Fak family	ENSCDRG00005009649	PTK2	protein tyrosine kinase 2 [Source:HGNC Symbol;Acc:HGNC:9611]
BUB1	BUB1 mitotic checkpoint serine/threonine kinase	enzyme	Bub family	ENSCDRG00005020333	BUB1	BUB1 mitotic checkpoint serine/threonine kinase [Source:NCBI gene;Acc:105092966]
BRD3	bromodomain containing 3	enzyme	Bromodomain kinase (BRDK) family	ENSCDRG00005000119	BRD3	bromodomain containing 3 [Source:HGNC Symbol;Acc:HGNC:1104]
MAP3K2	mitogen-activated protein kinase kinase kinase 2	enzyme	STE11 family	ENSCDRG00005004344	MAP3K2	mitogen-activated protein kinase kinase kinase 2 [Source:HGNC Symbol;Acc:HGNC:6854]
SIK2	salt inducible kinase 2	enzyme	QIK subfamily	ENSCDRG00005021980	SIK2	salt inducible kinase 2 [Source:HGNC Symbol;Acc:HGNC:21680]
ANKK1	ankyrin repeat and kinase domain containing 1	enzyme	Receptor interacting protein kinase (RIPK) family	ENSCDRG00005012156	ANKK1	ankyrin repeat and kinase domain containing 1 [Source:NCBI gene;Acc:105091738]
CDK1	cyclin dependent kinase 1	enzyme	CDK1 subfamily	ENSCDRG00005014195	CDK1	cyclin dependent kinase 1 [Source:NCBI gene;Acc:105093852]
DCLK2	doublecortin like kinase 2	enzyme	DCAMKL family	ENSCDRG00005019609	DCLK2	doublecortin like kinase 2 [Source:HGNC Symbol;Acc:HGNC:19002]
PFKFB3	6-phosphofructo-2-kinase/fructose-2,6-biphosphatase 3	enzyme	Sugar phosphatases	ENSCDRG00005014633	PFKFB3	6-phosphofructo-2-kinase/fructose-2,6-biphosphatase 3 [Source:HGNC Symbol;Acc:HGNC:8874]
CEL	carboxyl ester lipase	enzyme	3.1.1.- Carboxylic Ester Hydrolases	ENSCDRG00005003564	CEL	carboxyl ester lipase [Source:HGNC Symbol;Acc:HGNC:1848]
PPM1D	protein phosphatase, Mg2+/Mn2+ dependent 1D	enzyme	Metal-dependent protein phosphatase (PPM) family	ENSCDRG00005006091	PPM1D	protein phosphatase, Mg2+/Mn2+ dependent 1D [Source:HGNC Symbol;Acc:HGNC:9277]
PLA2G1B	phospholipase A2 group IB	enzyme	Phospholipase A<sub>2</sub>	ENSCDRG00005018265	PLA2G1B	phospholipase A2 group IB [Source:NCBI gene;Acc:105101999]
KYAT1	kynurenine aminotransferase 1	enzyme	Hydrogen sulphide synthesis	ENSCDRG00005001537	ENSCDRG00005001537	kynurenine aminotransferase 1 [Source:NCBI gene;Acc:105092558]
MFN1	mitofusin 1	enzyme	Mitofusin proteins	ENSCDRG00005000323	MFN1	mitofusin 1 [Source:NCBI gene;Acc:105085925]
PRKCE	protein kinase C epsilon	enzyme	Eta subfamily	ENSCDRG00005022256	PRKCE	protein kinase C epsilon [Source:NCBI gene;Acc:105103566]
CDC42BPG	CDC42 binding protein kinase gamma	enzyme	GEK subfamily	ENSCDRG00005012877	CDC42BPG	CDC42 binding protein kinase gamma [Source:HGNC Symbol;Acc:HGNC:29829]
GAA	glucosidase alpha, acid	enzyme	3.2.1.- Glycosidases	ENSCDRG00005018090	GAA	glucosidase alpha, acid [Source:HGNC Symbol;Acc:HGNC:4065]
PDE7B	phosphodiesterase 7B	enzyme	Phosphodiesterases, 3',5'-cyclic nucleotide (PDEs)	ENSCDRG00005018377	PDE7B	phosphodiesterase 7B [Source:HGNC Symbol;Acc:HGNC:8792]
KSR2	kinase suppressor of ras 2	enzyme	RAF family	ENSCDRG00005016782	KSR2	kinase suppressor of ras 2 [Source:HGNC Symbol;Acc:HGNC:18610]
PIK3CD	phosphatidylinositol-4,5-bisphosphate 3-kinase catalytic subunit delta	enzyme	Phosphatidylinositol-4,5-bisphosphate 3-kinase family	ENSCDRG00005012267	PIK3CD	phosphatidylinositol-4,5-bisphosphate 3-kinase catalytic subunit delta [Source:HGNC Symbol;Acc:HGNC:8977]
HDAC3	histone deacetylase 3	enzyme	3.5.1.- Histone deacetylases (HDACs)	ENSCDRG00005009144	HDAC3	histone deacetylase 3 [Source:NCBI gene;Acc:105090801]
PAH	phenylalanine hydroxylase	enzyme	Amino acid hydroxylases	ENSCDRG00005009962	PAH	phenylalanine hydroxylase [Source:HGNC Symbol;Acc:HGNC:8582]
GATM	glycine amidinotransferase	enzyme	Arginine:glycine amidinotransferase	ENSCDRG00005008146	GATM	glycine amidinotransferase [Source:NCBI gene;Acc:105101687]
RRM2	ribonucleotide reductase regulatory subunit M2	enzyme	1.17.4.1 Ribonucleoside-diphosphate reductases	ENSCDRG00005021436	RRM2	ribonucleotide reductase regulatory subunit M2 [Source:NCBI gene;Acc:105091241]
PTEN	phosphatase and tensin homolog	enzyme	Lipid phosphate phosphatases	ENSCDRG00005007749	PTEN	phosphatase and tensin homolog [Source:NCBI gene;Acc:105088956]
CYP4F11	cytochrome P450 family 4 subfamily F member 11	enzyme	CYP4 family	ENSCDRG00005021579	ENSCDRG00005021579	nan
CYP4F22	cytochrome P450 family 4 subfamily F member 22	enzyme	CYP4 family	ENSCDRG00005021598	CYP4F22	cytochrome P450 4F22 [Source:NCBI gene;Acc:105105134]
JMJD1C	jumonji domain containing 1C	enzyme	2.3.1.48 Histone acetyltransferases (HATs)	ENSCDRG00005014920	JMJD1C	jumonji domain containing 1C [Source:NCBI gene;Acc:105093864]
EIF2AK3	eukaryotic translation initiation factor 2 alpha kinase 3	enzyme	PEK subfamily	ENSCDRG00005013101	EIF2AK3	eukaryotic translation initiation factor 2 alpha kinase 3 [Source:NCBI gene;Acc:105104181]
CERS6	ceramide synthase 6	enzyme	Ceramide synthase	ENSCDRG00005008362	CERS6	ceramide synthase 6 [Source:NCBI gene;Acc:105091057]
SPTLC3	serine palmitoyltransferase long chain base subunit 3	enzyme	Serine palmitoyltransferase	ENSCDRG00005006217	ENSCDRG00005006217	nan
TP53RK	TP53 regulating kinase	enzyme	Bud32 family	ENSCDRG00005010195	TP53RK	TP53 regulating kinase [Source:HGNC Symbol;Acc:HGNC:16197]
PDE3A	phosphodiesterase 3A	enzyme	Phosphodiesterases, 3',5'-cyclic nucleotide (PDEs)	ENSCDRG00005018118	PDE3A	phosphodiesterase 3A [Source:NCBI gene;Acc:105096493]
SMPDL3A	sphingomyelin phosphodiesterase acid like 3A	enzyme	Sphingomyelin phosphodiesterase	ENSCDRG00005001863	SMPDL3A	sphingomyelin phosphodiesterase acid like 3A [Source:NCBI gene;Acc:105088361]
MOS	MOS proto-oncogene, serine/threonine kinase	enzyme	MOS family	ENSCDRG00005020244	MOS	MOS proto-oncogene, serine/threonine kinase [Source:NCBI gene;Acc:105097053]
CYP7B1	cytochrome P450 family 7 subfamily B member 1	enzyme	CYP5, CYP7 and CYP8 families	ENSCDRG00005020713	CYP7B1	25-hydroxycholesterol 7-alpha-hydroxylase [Source:NCBI gene;Acc:105094653]
METAP1D	methionyl aminopeptidase type 1D, mitochondrial	enzyme	M24: Methionyl aminopeptidase	ENSCDRG00005000687	METAP1D	methionyl aminopeptidase type 1D, mitochondrial [Source:HGNC Symbol;Acc:HGNC:32583]
LVRN	laeverin	enzyme	M1: Aminopeptidase N	ENSCDRG00005005784	LVRN	laeverin [Source:HGNC Symbol;Acc:HGNC:26904]
OXSR1	oxidative stress responsive kinase 1	enzyme	FRAY subfamily	ENSCDRG00005017858	OXSR1	oxidative stress responsive kinase 1 [Source:NCBI gene;Acc:105090691]
PHF8	PHD finger protein 8	enzyme	1.14.11.- Histone demethylases	ENSCDRG00005020670	PHF8	PHD finger protein 8 [Source:HGNC Symbol;Acc:HGNC:20672]
KAT5	lysine acetyltransferase 5	enzyme	2.3.1.48 Histone acetyltransferases (HATs)	ENSCDRG00005004500	KAT5	lysine acetyltransferase 5 [Source:NCBI gene;Acc:105102592]
GRK2	G protein-coupled receptor kinase 2	enzyme	Beta-adrenergic receptor kinases (&beta;ARKs)	ENSCDRG00005012468	GRK2	G protein-coupled receptor kinase 2 [Source:HGNC Symbol;Acc:HGNC:289]
HPSE	heparanase	enzyme	3.2.1.- Glycosidases	ENSCDRG00005003833	HPSE	heparanase [Source:HGNC Symbol;Acc:HGNC:5164]
KDM2A	lysine demethylase 2A	enzyme	1.14.11.- Histone demethylases	ENSCDRG00005012715	KDM2A	lysine demethylase 2A [Source:NCBI gene;Acc:105104438]
ADCK5	aarF domain containing kinase 5	enzyme	ABC1-B subfamily	ENSCDRG00005017394	ADCK5	aarF domain containing kinase 5 [Source:NCBI gene;Acc:105104993]
ADAMTS20	ADAM metallopeptidase with thrombospondin type 1 motif 20	enzyme	M12: Astacin/Adamalysin	ENSCDRG00005003815	ADAMTS20	ADAM metallopeptidase with thrombospondin type 1 motif 20 [Source:NCBI gene;Acc:105097095]
ADCY5	adenylate cyclase 5	enzyme	Adenylyl cyclases (ACs)	ENSCDRG00005006267	ADCY5	adenylate cyclase 5 [Source:HGNC Symbol;Acc:HGNC:236]
TNKS	tankyrase	enzyme	Poly ADP-ribose polymerases	ENSCDRG00005018988	TNKS	tankyrase [Source:HGNC Symbol;Acc:HGNC:11941]
MAP3K11	mitogen-activated protein kinase kinase kinase 11	enzyme	MLK subfamily	ENSCDRG00005005057	MAP3K11	mitogen-activated protein kinase kinase kinase 11 [Source:HGNC Symbol;Acc:HGNC:6850]
TRIB1	tribbles pseudokinase 1	enzyme	Trbl family	ENSCDRG00005005108	TRIB1	tribbles pseudokinase 1 [Source:HGNC Symbol;Acc:HGNC:16891]
PC	pyruvate carboxylase	enzyme	Carboxylases	ENSCDRG00005013184	PC	pyruvate carboxylase [Source:NCBI gene;Acc:105104442]
RCE1	Ras converting CAAX endopeptidase 1	enzyme	M79: Prenyl protease 2	ENSCDRG00005013931	RCE1	Ras converting CAAX endopeptidase 1 [Source:HGNC Symbol;Acc:HGNC:13721]
PLK3	polo like kinase 3	enzyme	Polo-like kinase (PLK) family	ENSCDRG00005014024	PLK3	polo like kinase 3 [Source:NCBI gene;Acc:105090883]
CTSF	cathepsin F	enzyme	C1: Papain	ENSCDRG00005015048	CTSF	cathepsin F [Source:HGNC Symbol;Acc:HGNC:2531]
ADCY6	adenylate cyclase 6	enzyme	Adenylyl cyclases (ACs)	ENSCDRG00005008996	ADCY6	adenylate cyclase 6 [Source:HGNC Symbol;Acc:HGNC:237]
TNK1	tyrosine kinase non receptor 1	enzyme	Ack family	ENSCDRG00005020924	TNK1	tyrosine kinase non receptor 1 [Source:HGNC Symbol;Acc:HGNC:11940]
BRSK2	BR serine/threonine kinase 2	enzyme	BRSK subfamily	ENSCDRG00005020830	ENSCDRG00005020830	nan
HRAS	HRas proto-oncogene, GTPase	enzyme	RAS subfamily	ENSCDRG00005007442	HRAS	HRas proto-oncogene, GTPase [Source:HGNC Symbol;Acc:HGNC:5173]
CA5A	carbonic anhydrase 5A	enzyme	Carbonic anhydrases	ENSCDRG00005020666	CA5A	carbonic anhydrase 5A [Source:NCBI gene;Acc:105104678]
ATR	ATR serine/threonine kinase	enzyme	ATR subfamily	ENSCDRG00005010671	ATR	ATR serine/threonine kinase [Source:NCBI gene;Acc:105086328]
PDIK1L	PDLIM1 interacting kinase 1 like	enzyme	NKF4 family	ENSCDRG00005005581	PDIK1L	PDLIM1 interacting kinase 1 like [Source:NCBI gene;Acc:105100677]
PCCA	propionyl-CoA carboxylase subunit alpha	enzyme	Carboxylases	ENSCDRG00005018123	PCCA	propionyl-CoA carboxylase subunit alpha [Source:HGNC Symbol;Acc:HGNC:8653]
PCSK1	proprotein convertase subtilisin/kexin type 1	enzyme	S8: Subtilisin	ENSCDRG00005011495	PCSK1	proprotein convertase subtilisin/kexin type 1 [Source:HGNC Symbol;Acc:HGNC:8743]
PNLIP	pancreatic lipase	enzyme	Hydrolases	ENSCDRG00005018716	PNLIP	pancreatic triacylglycerol lipase [Source:NCBI gene;Acc:105095102]
RPS6KB2	ribosomal protein S6 kinase B2	enzyme	p70 subfamily	ENSCDRG00005011373	RPS6KB2	ribosomal protein S6 kinase B2 [Source:NCBI gene;Acc:105104425]
YES1	YES proto-oncogene 1, Src family tyrosine kinase	enzyme	Src family	ENSCDRG00005020509	YES1	YES proto-oncogene 1, Src family tyrosine kinase [Source:NCBI gene;Acc:105086167]
SPHK1	sphingosine kinase 1	enzyme	Sphingosine kinase	ENSCDRG00005003776	SPHK1	sphingosine kinase 1 [Source:NCBI gene;Acc:105092188]
HSD11B2	hydroxysteroid 11-beta dehydrogenase 2	enzyme	1.-.-.- Oxidoreductases	ENSCDRG00005011575	HSD11B2	hydroxysteroid 11-beta dehydrogenase 2 [Source:HGNC Symbol;Acc:HGNC:5209]
RNPEP	arginyl aminopeptidase	enzyme	M1: Aminopeptidase N	ENSCDRG00005020217	RNPEP	arginyl aminopeptidase [Source:HGNC Symbol;Acc:HGNC:10078]
CLK2	CDC like kinase 2	enzyme	CLK family	ENSCDRG00005007685	CLK2	CDC like kinase 2 [Source:HGNC Symbol;Acc:HGNC:2069]
MAP3K19	mitogen-activated protein kinase kinase kinase 19	enzyme	STE20 subfamily	ENSCDRG00005016388	MAP3K19	mitogen-activated protein kinase kinase kinase 19 [Source:NCBI gene;Acc:105092383]
TYMS	thymidylate synthetase	enzyme	2.1.1.- Methyltransferases	ENSCDRG00005003000	#N/A	#N/A
DPP7	dipeptidyl peptidase 7	enzyme	S28: Lysosomal Pro-Xaa carboxypeptidase	ENSCDRG00005022261	DPP7	dipeptidyl peptidase 7 [Source:HGNC Symbol;Acc:HGNC:14892]
ACER2	alkaline ceramidase 2	enzyme	Alkaline ceramidases	ENSCDRG00005001013	ACER2	alkaline ceramidase 2 [Source:NCBI gene;Acc:105095941]
ULK1	unc-51 like autophagy activating kinase 1	enzyme	Unc-51-like kinase (ULK) family	ENSCDRG00005012605	ULK1	unc-51 like autophagy activating kinase 1 [Source:HGNC Symbol;Acc:HGNC:12558]
RPS6KA3	ribosomal protein S6 kinase A3	enzyme	RSK subfamily	ENSCDRG00005021577	RPS6KA3	ribosomal protein S6 kinase A3 [Source:HGNC Symbol;Acc:HGNC:10432]
NIM1K	NIM1 serine/threonine protein kinase	enzyme	NIM1 subfamily	ENSCDRG00005014864	NIM1K	NIM1 serine/threonine protein kinase [Source:NCBI gene;Acc:105107052]
HASPIN	histone H3 associated protein kinase	enzyme	Haspin family	ENSCDRG00005014791	HASPIN	histone H3 associated protein kinase [Source:HGNC Symbol;Acc:HGNC:19682]
GBA	glucosylceramidase beta	enzyme	3.2.1.- Glycosidases	ENSCDRG00005006922	GBA	glucosylceramidase beta [Source:HGNC Symbol;Acc:HGNC:4177]
IMPDH2	inosine monophosphate dehydrogenase 2	enzyme	1.-.-.- Oxidoreductases	ENSCDRG00005004218	IMPDH2	inosine monophosphate dehydrogenase 2 [Source:NCBI gene;Acc:105087813]
TSSK6	testis specific serine kinase 6	enzyme	Testis specific kinase (TSSK) family	ENSCDRG00005011623	TSSK6	testis specific serine kinase 6 [Source:NCBI gene;Acc:105103724]
ERN1	endoplasmic reticulum to nucleus signaling 1	enzyme	IRE family	ENSCDRG00005020928	ERN1	endoplasmic reticulum to nucleus signaling 1 [Source:HGNC Symbol;Acc:HGNC:3449]
CPN2	carboxypeptidase N subunit 2	enzyme	M14: Carboxypeptidase A	ENSCDRG00005013331	CPN2	carboxypeptidase N subunit 2 [Source:HGNC Symbol;Acc:HGNC:2313]
GAK	cyclin G associated kinase	enzyme	Numb-associated kinase (NAK) family	ENSCDRG00005006048	GAK	cyclin G associated kinase [Source:HGNC Symbol;Acc:HGNC:4113]
AURKB	aurora kinase B	enzyme	Aurora kinase (Aur) family	ENSCDRG00005014394	AURKB	aurora kinase B [Source:NCBI gene;Acc:105102991]
ALOXE3	arachidonate lipoxygenase 3	enzyme	Lipoxygenases	ENSCDRG00005013774	ALOXE3	arachidonate lipoxygenase 3 [Source:HGNC Symbol;Acc:HGNC:13743]
CLK3	CDC like kinase 3	enzyme	CLK family	ENSCDRG00005005008	CLK3	CDC like kinase 3 [Source:NCBI gene;Acc:105087265]
ALOX12B	arachidonate 12-lipoxygenase, 12R type	enzyme	Lipoxygenases	ENSCDRG00005013630	ALOX12B	arachidonate 12-lipoxygenase, 12R type [Source:NCBI gene;Acc:105103063]
ALOX15B	arachidonate 15-lipoxygenase type B	enzyme	Lipoxygenases	ENSCDRG00005012862	ALOX15B	arachidonate 15-lipoxygenase type B [Source:HGNC Symbol;Acc:HGNC:434]
TH	tyrosine hydroxylase	enzyme	Amino acid hydroxylases	ENSCDRG00005020996	TH	tyrosine hydroxylase [Source:HGNC Symbol;Acc:HGNC:11782]
F2	coagulation factor II, thrombin	enzyme	S1: Chymotrypsin	ENSCDRG00005009091	F2	coagulation factor II, thrombin [Source:HGNC Symbol;Acc:HGNC:3535]
PAK2	p21 (RAC1) activated kinase 2	enzyme	PAKA subfamily	ENSCDRG00005019813	PAK2	p21 (RAC1) activated kinase 2 [Source:NCBI gene;Acc:105101281]
CYP8B1	cytochrome P450 family 8 subfamily B member 1	enzyme	CYP5, CYP7 and CYP8 families	ENSCDRG00005020587	CYP8B1	5-beta-cholestane-3-alpha,7-alpha-diol 12-alpha-hydroxylase [Source:NCBI gene;Acc:105084606]
MAPK15	mitogen-activated protein kinase 15	enzyme	Erk7 subfamily	ENSCDRG00005006989	ENSCDRG00005006989	nan
EHMT1	euchromatic histone lysine methyltransferase 1	enzyme	2.1.1.43 Histone methyltransferases (HMTs)	ENSCDRG00005022171	EHMT1	euchromatic histone lysine methyltransferase 1 [Source:HGNC Symbol;Acc:HGNC:24650]
SETD2	SET domain containing 2, histone lysine methyltransferase	enzyme	2.1.1.43 Histone methyltransferases (HMTs)	ENSCDRG00005007882	SETD2	SET domain containing 2, histone lysine methyltransferase [Source:NCBI gene;Acc:105103636]
PRKAG1	protein kinase AMP-activated non-catalytic subunit gamma 1	enzyme	AMPK subfamily	ENSCDRG00005006815	PRKAG1	protein kinase AMP-activated non-catalytic subunit gamma 1 [Source:HGNC Symbol;Acc:HGNC:9385]
IDH2	isocitrate dehydrogenase (NADP(+)) 2	enzyme	1.1.1.42 Isocitrate dehydrogenases	ENSCDRG00005008978	IDH2	isocitrate dehydrogenase (NADP(+)) 2 [Source:HGNC Symbol;Acc:HGNC:5383]
BACE2	beta-secretase 2	enzyme	A1: Pepsin	ENSCDRG00005008744	BACE2	beta-secretase 2 [Source:HGNC Symbol;Acc:HGNC:934]
C1S	complement C1s	enzyme	S1: Chymotrypsin	ENSCDRG00005019604	C1S	complement C1s [Source:NCBI gene;Acc:105098188]
LIPF	lipase F, gastric type	enzyme	3.1.1.- Carboxylic Ester Hydrolases	ENSCDRG00005007510	LIPF	lipase F, gastric type [Source:HGNC Symbol;Acc:HGNC:6622]
FES	FES proto-oncogene, tyrosine kinase	enzyme	Fer family	ENSCDRG00005011337	FES	FES proto-oncogene, tyrosine kinase [Source:NCBI gene;Acc:105094697]
LIMK2	LIM domain kinase 2	enzyme	LIMK subfamily	ENSCDRG00005011800	LIMK2	LIM domain kinase 2 [Source:NCBI gene;Acc:105099426]
PLCB1	phospholipase C beta 1	enzyme	Phosphoinositide-specific phospholipase C	ENSCDRG00005007244	PLCB1	phospholipase C beta 1 [Source:NCBI gene;Acc:105101292]
LCK	LCK proto-oncogene, Src family tyrosine kinase	enzyme	Src family	ENSCDRG00005020518	LCK	LCK proto-oncogene, Src family tyrosine kinase [Source:NCBI gene;Acc:105085793]
ABAT	4-aminobutyrate aminotransferase	enzyme	GABA turnover	ENSCDRG00005009720	ABAT	4-aminobutyrate aminotransferase [Source:NCBI gene;Acc:105098591]
CAMK1D	calcium/calmodulin dependent protein kinase ID	enzyme	CAMK1 family	ENSCDRG00005019403	CAMK1D	calcium/calmodulin dependent protein kinase ID [Source:NCBI gene;Acc:105100308]
RIPK4	receptor interacting serine/threonine kinase 4	enzyme	Receptor interacting protein kinase (RIPK) family	ENSCDRG00005009625	RIPK4	receptor interacting serine/threonine kinase 4 [Source:NCBI gene;Acc:105101651]
TBK1	TANK binding kinase 1	enzyme	IKK family	ENSCDRG00005009688	TBK1	TANK binding kinase 1 [Source:NCBI gene;Acc:105089261]
CHEK2	checkpoint kinase 2	enzyme	CHK1 subfamily	ENSCDRG00005020458	CHEK2	checkpoint kinase 2 [Source:HGNC Symbol;Acc:HGNC:16627]
KMT5A	lysine methyltransferase 5A	enzyme	2.1.1.43 Histone methyltransferases (HMTs)	ENSCDRG00005022339	KMT5A	lysine methyltransferase 5A [Source:HGNC Symbol;Acc:HGNC:29489]
TMPRSS2	transmembrane serine protease 2	enzyme	S1: Chymotrypsin	ENSCDRG00005009423	TMPRSS2	transmembrane serine protease 2 [Source:NCBI gene;Acc:105101649]
IRAK1	interleukin 1 receptor associated kinase 1	enzyme	Interleukin-1 receptor-associated kinase (IRAK) family	ENSCDRG00005011306	IRAK1	interleukin 1 receptor associated kinase 1 [Source:HGNC Symbol;Acc:HGNC:6112]
PRKD1	protein kinase D1	enzyme	Protein kinase D (PKD) family	ENSCDRG00005013080	PRKD1	protein kinase D1 [Source:HGNC Symbol;Acc:HGNC:9407]
SRPK3	SRSF protein kinase 3	enzyme	SRPK family	ENSCDRG00005020984	SRPK3	SRSF protein kinase 3 [Source:HGNC Symbol;Acc:HGNC:11402]
PLA2G6	phospholipase A2 group VI	enzyme	Phospholipase A<sub>2</sub>	ENSCDRG00005011621	PLA2G6	phospholipase A2 group VI [Source:NCBI gene;Acc:105091954]
TOP1MT	DNA topoisomerase I mitochondrial	enzyme	DNA topoisomerases	ENSCDRG00005014284	ENSCDRG00005014284	nan
PDE4B	phosphodiesterase 4B	enzyme	Phosphodiesterases, 3',5'-cyclic nucleotide (PDEs)	ENSCDRG00005005526	PDE4B	phosphodiesterase 4B [Source:HGNC Symbol;Acc:HGNC:8781]
DGAT1	diacylglycerol O-acyltransferase 1	enzyme	2.3.1.- Acyltransferases	ENSCDRG00005016963	DGAT1	diacylglycerol O-acyltransferase 1 [Source:HGNC Symbol;Acc:HGNC:2843]
NT5C1B	5'-nucleotidase, cytosolic IB	enzyme	Adenosine turnover	ENSCDRG00005005015	ENSCDRG00005005015	nan
CA13	carbonic anhydrase 13	enzyme	Carbonic anhydrases	ENSCDRG00005017285	CA13	carbonic anhydrase 13 [Source:NCBI gene;Acc:105088506]
INPP5J	inositol polyphosphate-5-phosphatase J	enzyme	Inositol polyphosphate phosphatases	ENSCDRG00005012322	ENSCDRG00005012322	nan
NRBP2	nuclear receptor binding protein 2	enzyme	NRBP family	ENSCDRG00005009250	NRBP2	nuclear receptor binding protein 2 [Source:HGNC Symbol;Acc:HGNC:19339]
PRMT3	protein arginine methyltransferase 3	enzyme	2.1.1.- Protein arginine N-methyltransferases	ENSCDRG00005009301	PRMT3	protein arginine methyltransferase 3 [Source:HGNC Symbol;Acc:HGNC:30163]
CDK10	cyclin dependent kinase 10	enzyme	CDK10 subfamily	ENSCDRG00005019898	CDK10	cyclin dependent kinase 10 [Source:HGNC Symbol;Acc:HGNC:1770]
MAPK11	mitogen-activated protein kinase 11	enzyme	p38 subfamily	ENSCDRG00005015364	ENSCDRG00005015364	nan
PDE6G	phosphodiesterase 6G	enzyme	Phosphodiesterases, 3',5'-cyclic nucleotide (PDEs)	ENSCDRG00005010800	PDE6G	phosphodiesterase 6G [Source:NCBI gene;Acc:105105713]
PRKG1	protein kinase cGMP-dependent 1	enzyme	Protein kinase G (PKG) family	ENSCDRG00005009001	PRKG1	protein kinase cGMP-dependent 1 [Source:NCBI gene;Acc:105085256]
NAT8L	N-acetyltransferase 8 like	enzyme	2.3.1.- Acyltransferases	ENSCDRG00005004858	ENSCDRG00005004858	nan
GRK1	G protein-coupled receptor kinase 1	enzyme	Opsin/rhodopsin kinases	ENSCDRG00005011378	GRK1	G protein-coupled receptor kinase 1 [Source:HGNC Symbol;Acc:HGNC:10013]
CYP2R1	cytochrome P450 family 2 subfamily R member 1	enzyme	CYP2 family	ENSCDRG00005017151	CYP2R1	vitamin D 25-hydroxylase [Source:NCBI gene;Acc:105086686]
PIP5K1C	phosphatidylinositol-4-phosphate 5-kinase type 1 gamma	enzyme	Phosphatidylinositol phosphate kinases	ENSCDRG00005005583	PIP5K1C	phosphatidylinositol-4-phosphate 5-kinase type 1 gamma [Source:HGNC Symbol;Acc:HGNC:8996]
CYP4F2	cytochrome P450 family 4 subfamily F member 2	enzyme	CYP4 family	ENSCDRG00005021565	ENSCDRG00005021565	nan
KDM4D	lysine demethylase 4D	enzyme	1.14.11.- Histone demethylases	ENSCDRG00005016007	KDM4D	lysine demethylase 4D [Source:HGNC Symbol;Acc:HGNC:25498]
BACE1	beta-secretase 1	enzyme	A1: Pepsin	ENSCDRG00005018468	BACE1	beta-secretase 1 [Source:NCBI gene;Acc:105090186]
CYP4X1	cytochrome P450 family 4 subfamily X member 1	enzyme	CYP4 family	ENSCDRG00005019322	CYP4X1	cytochrome P450 family 4 subfamily X member 1 [Source:HGNC Symbol;Acc:HGNC:20244]
CYP4F8	cytochrome P450 family 4 subfamily F member 8	enzyme	CYP4 family	ENSCDRG00005021586	CYP4F8	cytochrome P450 family 4 subfamily F member 8 [Source:HGNC Symbol;Acc:HGNC:2648]
CYP4F3	cytochrome P450 family 4 subfamily F member 3	enzyme	CYP4 family	ENSCDRG00005021576	CYP4F3	docosahexaenoic acid omega-hydroxylase CYP4F3-like [Source:NCBI gene;Acc:105105129]
KATNA1	katanin catalytic subunit A1	enzyme	AAA ATPases	ENSCDRG00005021003	KATNA1	katanin catalytic subunit A1 [Source:NCBI gene;Acc:105100910]
PDE2A	phosphodiesterase 2A	enzyme	Phosphodiesterases, 3',5'-cyclic nucleotide (PDEs)	ENSCDRG00005001163	PDE2A	phosphodiesterase 2A [Source:NCBI gene;Acc:105096768]
CYP27C1	cytochrome P450 family 27 subfamily C member 1	enzyme	CYP24, CYP26 and CYP27 families	ENSCDRG00005004443	CYP27C1	cytochrome P450 27C1 [Source:NCBI gene;Acc:105084485]
BCR	BCR activator of RhoGEF and GTPase	enzyme	BCR family	ENSCDRG00005022061	BCR	BCR activator of RhoGEF and GTPase [Source:NCBI gene;Acc:105095188]
TMPRSS6	transmembrane serine protease 6	enzyme	S1: Chymotrypsin	ENSCDRG00005007670	TMPRSS6	transmembrane serine protease 6 [Source:NCBI gene;Acc:105101577]
PLCD1	phospholipase C delta 1	enzyme	Phosphoinositide-specific phospholipase C	ENSCDRG00005017073	PLCD1	phospholipase C delta 1 [Source:HGNC Symbol;Acc:HGNC:9060]
SIRT7	sirtuin 7	enzyme	3.5.1.- Histone deacetylases (HDACs)	ENSCDRG00005008861	SIRT7	sirtuin 7 [Source:HGNC Symbol;Acc:HGNC:14935]
SBK2	SH3 domain binding kinase family member 2	enzyme	NKF1 family	ENSCDRG00005008543	SBK2	SH3 domain binding kinase family member 2 [Source:HGNC Symbol;Acc:HGNC:34416]
CYP26C1	cytochrome P450 family 26 subfamily C member 1	enzyme	CYP24, CYP26 and CYP27 families	ENSCDRG00005015318	CYP26C1	cytochrome P450 family 26 subfamily C member 1 [Source:HGNC Symbol;Acc:HGNC:20577]
PLA2G4E	phospholipase A2 group IVE	enzyme	Phospholipase A<sub>2</sub>	ENSCDRG00005018656	PLA2G4E	phospholipase A2 group IVE [Source:NCBI gene;Acc:105101745]
MAPK12	mitogen-activated protein kinase 12	enzyme	p38 subfamily	ENSCDRG00005015256	MAPK12	mitogen-activated protein kinase 12 [Source:HGNC Symbol;Acc:HGNC:6874]
PRKAR1B	protein kinase cAMP-dependent type I regulatory subunit beta	enzyme	Protein kinase A (PKA) family	ENSCDRG00005018560	PRKAR1B	protein kinase cAMP-dependent type I regulatory subunit beta [Source:HGNC Symbol;Acc:HGNC:9390]
PLA2G2A	phospholipase A2 group IIA	enzyme	Hydrolases	ENSCDRG00005008305	PLA2G2A	phospholipase A2 group IIA [Source:NCBI gene;Acc:105088845]
DPYD	dihydropyrimidine dehydrogenase	enzyme	Nucleotide turnover	ENSCDRG00005001178	DPYD	dihydropyrimidine dehydrogenase [Source:HGNC Symbol;Acc:HGNC:3012]
IDO2	indoleamine 2,3-dioxygenase 2	enzyme	1.13.11.- Dioxygenases	ENSCDRG00005009189	IDO2	indoleamine 2,3-dioxygenase 2 [Source:NCBI gene;Acc:105105465]
PLA2G2E	phospholipase A2 group IIE	enzyme	Phospholipase A<sub>2</sub>	ENSCDRG00005008274	PLA2G2E	phospholipase A2 group IIE [Source:NCBI gene;Acc:105103971]
LRRK2	leucine rich repeat kinase 2	enzyme	Leucine-rich repeat kinase (LRRK) family	ENSCDRG00005005207	LRRK2	leucine rich repeat kinase 2 [Source:HGNC Symbol;Acc:HGNC:18618]
MAOA	monoamine oxidase A	enzyme	Catecholamine turnover	ENSCDRG00005020544	MAOA	monoamine oxidase A [Source:HGNC Symbol;Acc:HGNC:6833]
MMP23B	matrix metallopeptidase 23B	enzyme	M10: Matrix metallopeptidase	ENSCDRG00005007328	MMP23B	matrix metallopeptidase 23B [Source:HGNC Symbol;Acc:HGNC:7171]
STK40	serine/threonine kinase 40	enzyme	CAMK-unique family	ENSCDRG00005008254	STK40	serine/threonine kinase 40 [Source:HGNC Symbol;Acc:HGNC:21373]
XPNPEP3	X-prolyl aminopeptidase 3	enzyme	M24: Methionyl aminopeptidase	ENSCDRG00005016561	XPNPEP3	X-prolyl aminopeptidase 3 [Source:NCBI gene;Acc:105091914]
PPIA	peptidylprolyl isomerase A	enzyme	5.2.-.- Cis-trans-isomerases	ENSCDRG00005019174	ENSCDRG00005019174	nan
STK31	serine/threonine kinase 31	enzyme	Other-unique family	ENSCDRG00005000362	ENSCDRG00005000362	nan
TRRAP	transformation/transcription domain associated protein	enzyme	TRRAP subfamily	ENSCDRG00005012884	ENSCDRG00005012884	transformation/transcription domain associated protein [Source:HGNC Symbol;Acc:HGNC:12347]
PTPN1	protein tyrosine phosphatase non-receptor type 1	enzyme	Protein tyrosine phosphatases non-receptor type (PTPN)	ENSCDRG00005014827	PTPN1	protein tyrosine phosphatase non-receptor type 1 [Source:NCBI gene;Acc:105087880]
PIK3R4	phosphoinositide-3-kinase regulatory subunit 4	enzyme	Phosphatidylinositol kinases	ENSCDRG00005000341	PIK3R4	phosphoinositide-3-kinase regulatory subunit 4 [Source:NCBI gene;Acc:105088768]
MME	membrane metalloendopeptidase	enzyme	M13: Neprilysin	ENSCDRG00005000270	MME	membrane metalloendopeptidase [Source:NCBI gene;Acc:105094476]
HDAC2	histone deacetylase 2	enzyme	3.5.1.- Histone deacetylases (HDACs)	ENSCDRG00005003171	HDAC2	histone deacetylase 2 [Source:HGNC Symbol;Acc:HGNC:4853]
MMP1	matrix metallopeptidase 1	enzyme	M10: Matrix metallopeptidase	ENSCDRG00005001400	MMP1	matrix metallopeptidase 1 [Source:NCBI gene;Acc:105087169]
WNK3	WNK lysine deficient protein kinase 3	enzyme	Wnk family	ENSCDRG00005009083	WNK3	WNK lysine deficient protein kinase 3 [Source:HGNC Symbol;Acc:HGNC:14543]
DAPK1	death associated protein kinase 1	enzyme	Death-associated kinase (DAPK) family	ENSCDRG00005018762	DAPK1	death associated protein kinase 1 [Source:HGNC Symbol;Acc:HGNC:2674]
ADA	adenosine deaminase	enzyme	Adenosine turnover	ENSCDRG00005013531	ADA	adenosine deaminase [Source:NCBI gene;Acc:105087109]
CASP4	caspase 4	enzyme	C14: Caspase	ENSCDRG00005001740	ENSCDRG00005001740	caspase-13-like [Source:NCBI gene;Acc:105100419]
SRC	SRC proto-oncogene, non-receptor tyrosine kinase	enzyme	Src family	ENSCDRG00005018845	SRC	SRC proto-oncogene, non-receptor tyrosine kinase [Source:NCBI gene;Acc:105084996]
NEK5	NIMA related kinase 5	enzyme	NIMA (never in mitosis gene a)- related kinase (NEK) family	ENSCDRG00005021608	NEK5	NIMA related kinase 5 [Source:HGNC Symbol;Acc:HGNC:7748]
TRIM33	tripartite motif containing 33	enzyme	TIF1 family	ENSCDRG00005005176	TRIM33	tripartite motif containing 33 [Source:HGNC Symbol;Acc:HGNC:16290]
DIO3	iodothyronine deiodinase 3	enzyme	Thyroid hormone turnover	ENSCDRG00005005021	#N/A	#N/A
CYP2B6	cytochrome P450 family 2 subfamily B member 6	enzyme	CYP2 family	ENSCDRG00005014703	CYP2B6	cytochrome P450 2B4-like [Source:NCBI gene;Acc:105093363]
MAP3K5	mitogen-activated protein kinase kinase kinase 5	enzyme	STE11 family	ENSCDRG00005015332	MAP3K5	mitogen-activated protein kinase kinase kinase 5 [Source:NCBI gene;Acc:105092037]
CYP2F1	cytochrome P450 family 2 subfamily F member 1	enzyme	CYP2 family	ENSCDRG00005013510	CYP2F1	cytochrome P450 family 2 subfamily F member 1 [Source:HGNC Symbol;Acc:HGNC:2632]
ELANE	elastase, neutrophil expressed	enzyme	S1: Chymotrypsin	ENSCDRG00005018364	ELANE	elastase, neutrophil expressed [Source:HGNC Symbol;Acc:HGNC:3309]
DPP4	dipeptidyl peptidase 4	enzyme	S9: Prolyl oligopeptidase	ENSCDRG00005003295	ENSCDRG00005003295	nan
PHF2	PHD finger protein 2	enzyme	1.14.11.- Histone demethylases	ENSCDRG00005016927	PHF2	PHD finger protein 2 [Source:HGNC Symbol;Acc:HGNC:8920]
CFD	complement factor D	enzyme	3.4.21.46 Complement factor D	ENSCDRG00005018319	ENSCDRG00005018319	nan
CYP2A13	cytochrome P450 family 2 subfamily A member 13	enzyme	CYP2 family	ENSCDRG00005013573	ENSCDRG00005013573	cytochrome P450 2A13 [Source:NCBI gene;Acc:105093359]
PLCG2	phospholipase C gamma 2	enzyme	Phosphoinositide-specific phospholipase C	ENSCDRG00005001023	PLCG2	phospholipase C gamma 2 [Source:NCBI gene;Acc:105089440]
IRAK4	interleukin 1 receptor associated kinase 4	enzyme	Interleukin-1 receptor-associated kinase (IRAK) family	ENSCDRG00005003677	IRAK4	interleukin 1 receptor associated kinase 4 [Source:NCBI gene;Acc:105097094]
GRK6	G protein-coupled receptor kinase 6	enzyme	GRK4 subfamily	ENSCDRG00005008767	GRK6	G protein-coupled receptor kinase 6 [Source:NCBI gene;Acc:105099593]
CYP2A7	cytochrome P450 family 2 subfamily A member 7	enzyme	CYP2 family	ENSCDRG00005013573	ENSCDRG00005013573	cytochrome P450 2A13 [Source:NCBI gene;Acc:105093359]
RPS6KL1	ribosomal protein S6 kinase like 1	enzyme	RSKL family	ENSCDRG00005000787	RPS6KL1	ribosomal protein S6 kinase like 1 [Source:NCBI gene;Acc:105086097]
PIM3	Pim-3 proto-oncogene, serine/threonine kinase	enzyme	PIM family	ENSCDRG00005014206	PIM3	Pim-3 proto-oncogene, serine/threonine kinase [Source:HGNC Symbol;Acc:HGNC:19310]
OGA	O-GlcNAcase	enzyme	Hydrolases	ENSCDRG00005017195	OGA	O-GlcNAcase [Source:NCBI gene;Acc:105084341]
TLK1	tousled like kinase 1	enzyme	Tousled-like kinase (TLK) family	ENSCDRG00005000303	TLK1	tousled like kinase 1 [Source:HGNC Symbol;Acc:HGNC:11841]
MMP17	matrix metallopeptidase 17	enzyme	M10: Matrix metallopeptidase	ENSCDRG00005012401	MMP17	matrix metallopeptidase 17 [Source:HGNC Symbol;Acc:HGNC:7163]
STK39	serine/threonine kinase 39	enzyme	FRAY subfamily	ENSCDRG00005006583	STK39	serine/threonine kinase 39 [Source:HGNC Symbol;Acc:HGNC:17717]
TAT	tyrosine aminotransferase	enzyme	Catecholamine turnover	ENSCDRG00005008591	TAT	tyrosine aminotransferase [Source:NCBI gene;Acc:105088375]
CDC42BPB	CDC42 binding protein kinase beta	enzyme	GEK subfamily	ENSCDRG00005006234	CDC42BPB	CDC42 binding protein kinase beta [Source:HGNC Symbol;Acc:HGNC:1738]
MTOR	mechanistic target of rapamycin kinase	enzyme	FRAP subfamily	ENSCDRG00005016546	MTOR	mechanistic target of rapamycin kinase [Source:NCBI gene;Acc:105107024]
PNP	purine nucleoside phosphorylase	enzyme	2.4.2.1 Purine-nucleoside phosphorylase	ENSCDRG00005001806	PNP	purine nucleoside phosphorylase [Source:HGNC Symbol;Acc:HGNC:7892]
CES1	carboxylesterase 1	enzyme	Hydrolases	ENSCDRG00005001870	ENSCDRG00005001870	nan
STKLD1	serine/threonine kinase like domain containing 1	enzyme	Other-unique family	ENSCDRG00005000727	STKLD1	serine/threonine kinase like domain containing 1 [Source:HGNC Symbol;Acc:HGNC:28669]
GRK5	G protein-coupled receptor kinase 5	enzyme	GRK4 subfamily	ENSCDRG00005016297	GRK5	G protein-coupled receptor kinase 5 [Source:HGNC Symbol;Acc:HGNC:4544]
PRMT6	protein arginine methyltransferase 6	enzyme	2.1.1.- Protein arginine N-methyltransferases	ENSCDRG00005003982	PRMT6	protein arginine methyltransferase 6 [Source:NCBI gene;Acc:105085618]
TOP1	DNA topoisomerase I	enzyme	DNA topoisomerases	ENSCDRG00005009676	TOP1	DNA topoisomerase I [Source:NCBI gene;Acc:105085023]
MAP3K3	mitogen-activated protein kinase kinase kinase 3	enzyme	STE11 family	ENSCDRG00005021522	MAP3K3	mitogen-activated protein kinase kinase kinase 3 [Source:HGNC Symbol;Acc:HGNC:6855]
TGM2	transglutaminase 2	enzyme	2.3.2.13 Transglutaminases	ENSCDRG00005019249	TGM2	transglutaminase 2 [Source:NCBI gene;Acc:105085004]
SGMS1	sphingomyelin synthase 1	enzyme	Sphingomyelin synthase	ENSCDRG00005008417	SGMS1	sphingomyelin synthase 1 [Source:NCBI gene;Acc:105088962]
INPP5B	inositol polyphosphate-5-phosphatase B	enzyme	Inositol polyphosphate phosphatases	ENSCDRG00005010217	INPP5B	inositol polyphosphate-5-phosphatase B [Source:HGNC Symbol;Acc:HGNC:6077]
ASAH2B	N-acylsphingosine amidohydrolase 2B	enzyme	Neutral ceramidases	ENSCDRG00005008481	ENSCDRG00005008481	N-acylsphingosine amidohydrolase 2 [Source:HGNC Symbol;Acc:HGNC:18860]
BRD2	bromodomain containing 2	enzyme	Bromodomain kinase (BRDK) family	ENSCDRG00005021496	BRD2	bromodomain containing 2 [Source:HGNC Symbol;Acc:HGNC:1103]
PSMB8	proteasome 20S subunit beta 8	enzyme	T1: Proteasome	ENSCDRG00005021475	PSMB8	proteasome 20S subunit beta 8 [Source:NCBI gene;Acc:105101405]
STK19	serine/threonine kinase 19	enzyme	G11 family	ENSCDRG00005013204	STK19	serine/threonine kinase 19 [Source:HGNC Symbol;Acc:HGNC:11398]
EHMT2	euchromatic histone lysine methyltransferase 2	enzyme	2.1.1.43 Histone methyltransferases (HMTs)	ENSCDRG00005010474	EHMT2	euchromatic histone lysine methyltransferase 2 [Source:NCBI gene;Acc:105087443]
CSNK2B	casein kinase 2 beta	enzyme	Casein kinase 2 (CK2) family	ENSCDRG00005020319	CSNK2B	casein kinase 2 beta [Source:HGNC Symbol;Acc:HGNC:2460]
PRSS1	serine protease 1	enzyme	S1: Chymotrypsin	ENSCDRG00005006071	ENSCDRG00005006071	anionic trypsin [Source:NCBI gene;Acc:105088684]
CDKL4	cyclin dependent kinase like 4	enzyme	Cyclin-dependent kinase-like (CDKL) family	ENSCDRG00005015173	CDKL4	cyclin dependent kinase like 4 [Source:HGNC Symbol;Acc:HGNC:19287]
PDE7A	phosphodiesterase 7A	enzyme	Phosphodiesterases, 3',5'-cyclic nucleotide (PDEs)	ENSCDRG00005020748	PDE7A	phosphodiesterase 7A [Source:HGNC Symbol;Acc:HGNC:8791]
NT5M	5',3'-nucleotidase, mitochondrial	enzyme	Adenosine turnover	ENSCDRG00005020502	NT5M	5',3'-nucleotidase, mitochondrial [Source:HGNC Symbol;Acc:HGNC:15769]
TSSK2	testis specific serine kinase 2	enzyme	Testis specific kinase (TSSK) family	ENSCDRG00005019423	TSSK2	testis specific serine kinase 2 [Source:NCBI gene;Acc:105095236]
DIO1	iodothyronine deiodinase 1	enzyme	Thyroid hormone turnover	ENSCDRG00005010044	DIO1	iodothyronine deiodinase 1 [Source:HGNC Symbol;Acc:HGNC:2883]
STK38L	serine/threonine kinase 38 like	enzyme	NDR family	ENSCDRG00005010444	STK38L	serine/threonine kinase 38 like [Source:NCBI gene;Acc:105103518]
TSSK1B	testis specific serine kinase 1B	enzyme	Testis specific kinase (TSSK) family	ENSCDRG00005019438	TSSK1B	testis specific serine kinase 1B [Source:HGNC Symbol;Acc:HGNC:14968]
NRAS	NRAS proto-oncogene, GTPase	enzyme	RAS subfamily	ENSCDRG00005004935	NRAS	NRAS proto-oncogene, GTPase [Source:HGNC Symbol;Acc:HGNC:7989]
LTC4S	leukotriene C4 synthase	enzyme	Leukotriene and lipoxin metabolism	ENSCDRG00005005617	LTC4S	leukotriene C4 synthase [Source:HGNC Symbol;Acc:HGNC:6719]
CHUK	component of inhibitor of nuclear factor kappa B kinase complex	enzyme	IKK family	ENSCDRG00005019321	CHUK	component of inhibitor of nuclear factor kappa B kinase complex [Source:HGNC Symbol;Acc:HGNC:1974]
DDAH2	dimethylarginine dimethylaminohydrolase 2	enzyme	Dimethylarginine dimethylaminohydrolases	ENSCDRG00005020427	DDAH2	dimethylarginine dimethylaminohydrolase 2 [Source:NCBI gene;Acc:105087455]
CSNK1E	casein kinase 1 epsilon	enzyme	Casein kinase 1 (CK1) family	ENSCDRG00005011965	ENSCDRG00005011965	casein kinase 1 epsilon [Source:NCBI gene;Acc:105091951]
WEE2	WEE2 oocyte meiosis inhibiting kinase	enzyme	WEE family	ENSCDRG00005004501	WEE2	WEE2 oocyte meiosis inhibiting kinase [Source:NCBI gene;Acc:105097323]
PPME1	protein phosphatase methylesterase 1	enzyme	3.1.1.- Carboxylic Ester Hydrolases	ENSCDRG00005002613	PPME1	protein phosphatase methylesterase 1 [Source:HGNC Symbol;Acc:HGNC:30178]
NPEPL1	aminopeptidase like 1	enzyme	M17: Leucyl aminopeptidase	ENSCDRG00005019177	NPEPL1	aminopeptidase like 1 [Source:HGNC Symbol;Acc:HGNC:16244]
CERS1	ceramide synthase 1	enzyme	Ceramide synthase	ENSCDRG00005013600	CERS1	ceramide synthase 1 [Source:HGNC Symbol;Acc:HGNC:14253]
DHFR	dihydrofolate reductase	enzyme	1.-.-.- Oxidoreductases	ENSCDRG00005018379	ENSCDRG00005018379	dihydrofolate reductase [Source:NCBI gene;Acc:105084839]
CYP21A2	cytochrome P450 family 21 subfamily A member 2	enzyme	CYP11, CYP17, CYP19, CYP20 and CYP21 families	ENSCDRG00005021227	CYP21A2	cytochrome P450 family 21 subfamily A member 2 [Source:HGNC Symbol;Acc:HGNC:2600]
PSMB9	proteasome 20S subunit beta 9	enzyme	T1: Proteasome	ENSCDRG00005021480	PSMB9	proteasome 20S subunit beta 9 [Source:NCBI gene;Acc:105101404]
UGT1A1	UDP glucuronosyltransferase family 1 member A1	enzyme	UDP glucuronosyltransferases (UGT)	ENSCDRG00005011851	UGT1A1	UDP-glucuronosyltransferase 1-6-like [Source:NCBI gene;Acc:105105244]
PISD	phosphatidylserine decarboxylase	enzyme	Decarboxylases	ENSCDRG00005010080	PISD	phosphatidylserine decarboxylase [Source:HGNC Symbol;Acc:HGNC:8999]
PI4KA	phosphatidylinositol 4-kinase alpha	enzyme	1-phosphatidylinositol 4-kinase family	ENSCDRG00005012681	PI4KA	phosphatidylinositol 4-kinase alpha [Source:HGNC Symbol;Acc:HGNC:8983]
AMY2A	amylase alpha 2A	enzyme	3.2.1.- Glycosidases	ENSCDRG00005004032	ENSCDRG00005004032	pancreatic alpha-amylase [Source:NCBI gene;Acc:105085612]
CFB	complement factor B	enzyme	S1: Chymotrypsin	ENSCDRG00005012567	ENSCDRG00005012567	complement factor B [Source:NCBI gene;Acc:105087438]
PLA2G4B	phospholipase A2 group IVB	enzyme	Phospholipase A<sub>2</sub>	ENSCDRG00005019042	ENSCDRG00005019042	nan
TWF2	twinfilin actin binding protein 2	enzyme	Twinfilin subfamily	ENSCDRG00005015927	TWF2	twinfilin actin binding protein 2 [Source:HGNC Symbol;Acc:HGNC:9621]
CDK11B	cyclin dependent kinase 11B	enzyme	PITSLRE subfamily	ENSCDRG00005007446	ENSCDRG00005007446	nan
CDK3	cyclin dependent kinase 3	enzyme	CDK1 subfamily	ENSCDRG00005004773	CDK3	cyclin dependent kinase 3 [Source:HGNC Symbol;Acc:HGNC:1772]
PRKDC	protein kinase, DNA-activated, catalytic subunit	enzyme	Other PIKK family kinases	ENSCDRG00005009363	PRKDC	protein kinase, DNA-activated, catalytic subunit [Source:HGNC Symbol;Acc:HGNC:9413]
LYN	LYN proto-oncogene, Src family tyrosine kinase	enzyme	Src family	ENSCDRG00005020208	LYN	LYN proto-oncogene, Src family tyrosine kinase [Source:HGNC Symbol;Acc:HGNC:6735]
DPP3	dipeptidyl peptidase 3	enzyme	M49: Dipeptidyl-peptidase III	ENSCDRG00005015714	DPP3	dipeptidyl peptidase 3 [Source:HGNC Symbol;Acc:HGNC:3008]
CYP2A6	cytochrome P450 family 2 subfamily A member 6	enzyme	CYP2 family	ENSCDRG00005013573	ENSCDRG00005013573	cytochrome P450 2A13 [Source:NCBI gene;Acc:105093359]
PGA5	pepsinogen A5	enzyme	A1: Pepsin	ENSCDRG00005009757	ENSCDRG00005009757	Camelus dromedarius pepsin A-like (LOC105094886), mRNA. [Source:RefSeq mRNA;Acc:NM_001303576]
MGAM	maltase-glucoamylase	enzyme	3.2.1.- Glycosidases	ENSCDRG00005005484	MGAM	maltase-glucoamylase [Source:NCBI gene;Acc:105097331]
FNTB	farnesyltransferase, CAAX box, beta	enzyme	2.5.1.58 Protein farnesyltransferase	ENSCDRG00005001508	ENSCDRG00005001508	protein farnesyltransferase subunit beta [Source:NCBI gene;Acc:105086183]
MMP12	matrix metallopeptidase 12	enzyme	M10: Matrix metallopeptidase	ENSCDRG00005001447	MMP12	matrix metallopeptidase 12 [Source:NCBI gene;Acc:105087167]
IKBKE	inhibitor of nuclear factor kappa B kinase subunit epsilon	enzyme	IKK family	ENSCDRG00005010352	IKBKE	inhibitor of nuclear factor kappa B kinase subunit epsilon [Source:NCBI gene;Acc:105098613]
STRADA	STE20 related adaptor alpha	enzyme	STLK subfamily	ENSCDRG00005021250	STRADA	STE20 related adaptor alpha [Source:NCBI gene;Acc:105090409]
EGLN2	egl-9 family hypoxia inducible factor 2	enzyme	Prolyl hydroxylases	ENSCDRG00005013401	ENSCDRG00005013401	nan
MMP28	matrix metallopeptidase 28	enzyme	M10: Matrix metallopeptidase	ENSCDRG00005011722	MMP28	matrix metallopeptidase 28 [Source:HGNC Symbol;Acc:HGNC:14366]
PRSS2	serine protease 2	enzyme	S1: Chymotrypsin	ENSCDRG00005006071	ENSCDRG00005006071	anionic trypsin [Source:NCBI gene;Acc:105088684]
PIP4K2B	phosphatidylinositol-5-phosphate 4-kinase type 2 beta	enzyme	Phosphatidylinositol phosphate kinases	ENSCDRG00005019827	PIP4K2B	phosphatidylinositol-5-phosphate 4-kinase type 2 beta [Source:NCBI gene;Acc:105099063]
SRD5A2	steroid 5 alpha-reductase 2	enzyme	1.-.-.- Oxidoreductases	ENSCDRG00005014484	SRD5A2	steroid 5 alpha-reductase 2 [Source:HGNC Symbol;Acc:HGNC:11285]
ACACA	acetyl-CoA carboxylase alpha	enzyme	Carboxylases	ENSCDRG00005007352	ACACA	acetyl-CoA carboxylase alpha [Source:HGNC Symbol;Acc:HGNC:84]
PDE11A	phosphodiesterase 11A	enzyme	Phosphodiesterases, 3',5'-cyclic nucleotide (PDEs)	ENSCDRG00005002676	ENSCDRG00005002676	nan

## Sheet: e
Classification of camel SON basal genes - G protein coupled receptors
human_ortholog_name	HGNC name	Type	Family name	camel_ensembl_ids	camel_external_gene_names	camel_descriptions
CALCR	calcitonin receptor	gpcr	Calcitonin receptors	ENSCDRG00005000927	CALCR	calcitonin receptor [Source:NCBI gene;Acc:105088743]
TBXA2R	thromboxane A2 receptor	gpcr	Prostanoid receptors	ENSCDRG00005005933	TBXA2R	thromboxane A2 receptor [Source:NCBI gene;Acc:105102653]
CELSR3	cadherin EGF LAG seven-pass G-type receptor 3	gpcr	Adhesion Class GPCRs	ENSCDRG00005014606	CELSR3	cadherin EGF LAG seven-pass G-type receptor 3 [Source:HGNC Symbol;Acc:HGNC:3230]
GIPR	gastric inhibitory polypeptide receptor	gpcr	Glucagon receptor family	ENSCDRG00005009575	GIPR	gastric inhibitory polypeptide receptor [Source:HGNC Symbol;Acc:HGNC:4271]
GPRC5A	G protein-coupled receptor class C group 5 member A	gpcr	Class C Orphans	ENSCDRG00005010451	GPRC5A	G protein-coupled receptor class C group 5 member A [Source:NCBI gene;Acc:105094248]
ADGRA2	adhesion G protein-coupled receptor A2	gpcr	Adhesion Class GPCRs	ENSCDRG00005015621	ADGRA2	adhesion G protein-coupled receptor A2 [Source:HGNC Symbol;Acc:HGNC:17849]
CASR	calcium sensing receptor	gpcr	Calcium-sensing receptor	ENSCDRG00005007236	CASR	calcium sensing receptor [Source:HGNC Symbol;Acc:HGNC:1514]
PTGER3	prostaglandin E receptor 3	gpcr	Prostanoid receptors	ENSCDRG00005009342	PTGER3	prostaglandin E receptor 3 [Source:HGNC Symbol;Acc:HGNC:9595]
NPFFR2	neuropeptide FF receptor 2	gpcr	Neuropeptide FF/neuropeptide AF receptors	ENSCDRG00005019701	NPFFR2	neuropeptide FF receptor 2 [Source:NCBI gene;Acc:105091231]
LPAR2	lysophosphatidic acid receptor 2	gpcr	Lysophospholipid (LPA) receptors	ENSCDRG00005011318	LPAR2	lysophosphatidic acid receptor 2 [Source:NCBI gene;Acc:105103737]
CALCRL	calcitonin receptor like receptor	gpcr	Calcitonin receptors	ENSCDRG00005009544	CALCRL	calcitonin receptor like receptor [Source:HGNC Symbol;Acc:HGNC:16709]
GLP2R	glucagon like peptide 2 receptor	gpcr	Glucagon receptor family	ENSCDRG00005016987	GLP2R	glucagon like peptide 2 receptor [Source:NCBI gene;Acc:105099002]
ADGRF5	adhesion G protein-coupled receptor F5	gpcr	Adhesion Class GPCRs	ENSCDRG00005017711	ADGRF5	adhesion G protein-coupled receptor F5 [Source:NCBI gene;Acc:105101210]
DRD4	dopamine receptor D4	gpcr	Dopamine receptors	ENSCDRG00005008371	DRD4	dopamine receptor D4 [Source:HGNC Symbol;Acc:HGNC:3025]
ADGRL1	adhesion G protein-coupled receptor L1	gpcr	Adhesion Class GPCRs	ENSCDRG00005015480	ADGRL1	adhesion G protein-coupled receptor L1 [Source:NCBI gene;Acc:105100778]
TACR2	tachykinin receptor 2	gpcr	Tachykinin receptors	ENSCDRG00005007405	TACR2	tachykinin receptor 2 [Source:HGNC Symbol;Acc:HGNC:11527]
CELSR1	cadherin EGF LAG seven-pass G-type receptor 1	gpcr	Adhesion Class GPCRs	ENSCDRG00005012889	CELSR1	cadherin EGF LAG seven-pass G-type receptor 1 [Source:HGNC Symbol;Acc:HGNC:1850]
ADCYAP1R1	ADCYAP receptor type I	gpcr	VIP and PACAP receptors	ENSCDRG00005002835	ADCYAP1R1	ADCYAP receptor type I [Source:HGNC Symbol;Acc:HGNC:242]
P2RY10	P2Y receptor family member 10	gpcr	Class A Orphans	ENSCDRG00005021126	P2RY10	P2Y receptor family member 10 [Source:HGNC Symbol;Acc:HGNC:19906]
SCTR	secretin receptor	gpcr	Glucagon receptor family	ENSCDRG00005012956	SCTR	secretin receptor [Source:HGNC Symbol;Acc:HGNC:10608]
OPRK1	opioid receptor kappa 1	gpcr	Opioid receptors	ENSCDRG00005019845	OPRK1	opioid receptor kappa 1 [Source:HGNC Symbol;Acc:HGNC:8154]
BDKRB1	bradykinin receptor B1	gpcr	Bradykinin receptors	ENSCDRG00005001772	BDKRB1	bradykinin receptor B1 [Source:NCBI gene;Acc:105095510]
HRH3	histamine receptor H3	gpcr	Histamine receptors	ENSCDRG00005005077	HRH3	histamine receptor H3 [Source:HGNC Symbol;Acc:HGNC:5184]
NTSR1	neurotensin receptor 1	gpcr	Neurotensin receptors	ENSCDRG00005006734	NTSR1	neurotensin receptor 1 [Source:HGNC Symbol;Acc:HGNC:8039]
PROKR2	prokineticin receptor 2	gpcr	Prokineticin receptors	ENSCDRG00005008753	PROKR2	prokineticin receptor 2 [Source:HGNC Symbol;Acc:HGNC:15836]
GPR143	G protein-coupled receptor 143	gpcr	Other 7TM proteins	ENSCDRG00005019461	GPR143	G protein-coupled receptor 143 [Source:HGNC Symbol;Acc:HGNC:20145]
OPN1LW	opsin 1, long wave sensitive	gpcr	Opsin receptors	ENSCDRG00005011483	ENSCDRG00005011483	nan
GPR50	G protein-coupled receptor 50	gpcr	Class A Orphans	ENSCDRG00005017269	GPR50	G protein-coupled receptor 50 [Source:HGNC Symbol;Acc:HGNC:4506]
BRS3	bombesin receptor subtype 3	gpcr	Bombesin receptors	ENSCDRG00005010564	BRS3	bombesin receptor subtype 3 [Source:NCBI gene;Acc:105103832]
HTR2A	5-hydroxytryptamine receptor 2A	gpcr	5-Hydroxytryptamine receptors	ENSCDRG00005006846	HTR2A	5-hydroxytryptamine receptor 2A [Source:NCBI gene;Acc:105089744]
FZD3	frizzled class receptor 3	gpcr	Class Frizzled GPCRs	ENSCDRG00005019948	FZD3	frizzled class receptor 3 [Source:NCBI gene;Acc:105102079]
VIPR2	vasoactive intestinal peptide receptor 2	gpcr	VIP and PACAP receptors	ENSCDRG00005018115	VIPR2	vasoactive intestinal peptide receptor 2 [Source:HGNC Symbol;Acc:HGNC:12695]
CRHR2	corticotropin releasing hormone receptor 2	gpcr	Corticotropin-releasing factor receptors	ENSCDRG00005002457	CRHR2	corticotropin releasing hormone receptor 2 [Source:NCBI gene;Acc:105095848]
GHRHR	growth hormone releasing hormone receptor	gpcr	Glucagon receptor family	ENSCDRG00005002788	GHRHR	growth hormone releasing hormone receptor [Source:HGNC Symbol;Acc:HGNC:4266]
GNRHR	gonadotropin releasing hormone receptor	gpcr	Gonadotrophin-releasing hormone receptors	ENSCDRG00005017041	GNRHR	gonadotropin releasing hormone receptor [Source:HGNC Symbol;Acc:HGNC:4421]
CCKBR	cholecystokinin B receptor	gpcr	Cholecystokinin receptors	ENSCDRG00005015928	CCKBR	cholecystokinin B receptor [Source:NCBI gene;Acc:105097920]
GPRC5D	G protein-coupled receptor class C group 5 member D	gpcr	Class C Orphans	ENSCDRG00005010486	GPRC5D	G protein-coupled receptor class C group 5 member D [Source:HGNC Symbol;Acc:HGNC:13310]
FZD10	frizzled class receptor 10	gpcr	Class Frizzled GPCRs	ENSCDRG00005005248	FZD10	frizzled class receptor 10 [Source:HGNC Symbol;Acc:HGNC:4039]
ADGRD1	adhesion G protein-coupled receptor D1	gpcr	Adhesion Class GPCRs	ENSCDRG00005008511	ADGRD1	adhesion G protein-coupled receptor D1 [Source:HGNC Symbol;Acc:HGNC:19893]
OPRM1	opioid receptor mu 1	gpcr	Opioid receptors	ENSCDRG00005019256	OPRM1	opioid receptor mu 1 [Source:NCBI gene;Acc:105100935]
GLP1R	glucagon like peptide 1 receptor	gpcr	Glucagon receptor family	ENSCDRG00005014658	GLP1R	glucagon like peptide 1 receptor [Source:HGNC Symbol;Acc:HGNC:4324]
ADGRG6	adhesion G protein-coupled receptor G6	gpcr	Adhesion Class GPCRs	ENSCDRG00005011620	ADGRG6	adhesion G protein-coupled receptor G6 [Source:NCBI gene;Acc:105092056]
CCR6	C-C motif chemokine receptor 6	gpcr	Chemokine receptors	ENSCDRG00005007993	CCR6	C-C motif chemokine receptor 6 [Source:NCBI gene;Acc:105101448]
GRM6	glutamate metabotropic receptor 6	gpcr	Metabotropic glutamate receptors	ENSCDRG00005006835	GRM6	glutamate metabotropic receptor 6 [Source:HGNC Symbol;Acc:HGNC:4598]
HRH2	histamine receptor H2	gpcr	Histamine receptors	ENSCDRG00005004042	HRH2	histamine receptor H2 [Source:NCBI gene;Acc:105101939]
VIPR1	vasoactive intestinal peptide receptor 1	gpcr	VIP and PACAP receptors	ENSCDRG00005020388	VIPR1	vasoactive intestinal peptide receptor 1 [Source:NCBI gene;Acc:105084616]
TACR1	tachykinin receptor 1	gpcr	Tachykinin receptors	ENSCDRG00005008644	TACR1	tachykinin receptor 1 [Source:NCBI gene;Acc:105096268]
OPRD1	opioid receptor delta 1	gpcr	Opioid receptors	ENSCDRG00005006966	OPRD1	opioid receptor delta 1 [Source:HGNC Symbol;Acc:HGNC:8153]
ADGRL2	adhesion G protein-coupled receptor L2	gpcr	Adhesion Class GPCRs	ENSCDRG00005015074	ADGRL2	adhesion G protein-coupled receptor L2 [Source:HGNC Symbol;Acc:HGNC:18582]
CNR1	cannabinoid receptor 1	gpcr	Cannabinoid receptors	ENSCDRG00005018154	CNR1	cannabinoid receptor 1 [Source:NCBI gene;Acc:105095542]
GPR68	G protein-coupled receptor 68	gpcr	Class A Orphans	ENSCDRG00005005090	GPR68	G protein-coupled receptor 68 [Source:HGNC Symbol;Acc:HGNC:4519]
GPR31	G protein-coupled receptor 31	gpcr	Class A Orphans	ENSCDRG00005007976	GPR31	G protein-coupled receptor 31 [Source:HGNC Symbol;Acc:HGNC:4486]
ADRA1A	adrenoceptor alpha 1A	gpcr	Adrenoceptors	ENSCDRG00005019146	ADRA1A	adrenoceptor alpha 1A [Source:NCBI gene;Acc:105102306]
TAS2R10	taste 2 receptor member 10	gpcr	Taste 2 receptors	ENSCDRG00005009394	TAS2R10	taste 2 receptor member 10 [Source:NCBI gene;Acc:105094230]
TAS2R7	taste 2 receptor member 7	gpcr	Taste 2 receptors	ENSCDRG00005009318	TAS2R7	taste 2 receptor member 7 [Source:HGNC Symbol;Acc:HGNC:14913]
ADGRB2	adhesion G protein-coupled receptor B2	gpcr	Adhesion Class GPCRs	ENSCDRG00005017991	ADGRB2	adhesion G protein-coupled receptor B2 [Source:NCBI gene;Acc:105085808]
HCRTR1	hypocretin receptor 1	gpcr	Orexin receptors	ENSCDRG00005017596	HCRTR1	hypocretin receptor 1 [Source:NCBI gene;Acc:105085810]
CCRL2	C-C motif chemokine receptor like 2	gpcr	Chemokine receptors	ENSCDRG00005005906	CCRL2	C-C motif chemokine receptor like 2 [Source:HGNC Symbol;Acc:HGNC:1612]
CCR2	C-C motif chemokine receptor 2	gpcr	Chemokine receptors	ENSCDRG00005005891	CCR2	C-C motif chemokine receptor 2 [Source:NCBI gene;Acc:105103470]
GHSR	growth hormone secretagogue receptor	gpcr	Ghrelin receptor	ENSCDRG00005011555	GHSR	growth hormone secretagogue receptor [Source:HGNC Symbol;Acc:HGNC:4267]
CXCR4	C-X-C motif chemokine receptor 4	gpcr	Chemokine receptors	ENSCDRG00005018891	CXCR4	C-X-C motif chemokine receptor 4 [Source:NCBI gene;Acc:105092280]
OPN4	opsin 4	gpcr	Opsin receptors	ENSCDRG00005012026	ENSCDRG00005012026	opsin 4 [Source:NCBI gene;Acc:105104006]
PTGFR	prostaglandin F receptor	gpcr	Prostanoid receptors	ENSCDRG00005014602	PTGFR	prostaglandin F receptor [Source:NCBI gene;Acc:105096669]
ADGRE5	adhesion G protein-coupled receptor E5	gpcr	Adhesion Class GPCRs	ENSCDRG00005015305	ADGRE5	adhesion G protein-coupled receptor E5 [Source:HGNC Symbol;Acc:HGNC:1711]
GPR83	G protein-coupled receptor 83	gpcr	Class A Orphans	ENSCDRG00005014899	GPR83	G protein-coupled receptor 83 [Source:NCBI gene;Acc:105096543]
MC3R	melanocortin 3 receptor	gpcr	Melanocortin receptors	ENSCDRG00005017174	MC3R	melanocortin 3 receptor [Source:NCBI gene;Acc:105098854]
GRM4	glutamate metabotropic receptor 4	gpcr	Metabotropic glutamate receptors	ENSCDRG00005003578	GRM4	glutamate metabotropic receptor 4 [Source:NCBI gene;Acc:105101369]
OPN5	opsin 5	gpcr	Opsin receptors	ENSCDRG00005018260	OPN5	opsin 5 [Source:NCBI gene;Acc:105102163]
GPR18	G protein-coupled receptor 18	gpcr	Class A Orphans	ENSCDRG00005017829	GPR18	G protein-coupled receptor 18 [Source:NCBI gene;Acc:105089226]
PTGER2	prostaglandin E receptor 2	gpcr	Prostanoid receptors	ENSCDRG00005001414	PTGER2	prostaglandin E receptor 2 [Source:HGNC Symbol;Acc:HGNC:9594]
OPRL1	opioid related nociceptin receptor 1	gpcr	Opioid receptors	ENSCDRG00005012998	OPRL1	opioid related nociceptin receptor 1 [Source:NCBI gene;Acc:105103401]
NPBWR2	neuropeptides B and W receptor 2	gpcr	Neuropeptide W/neuropeptide B receptors	ENSCDRG00005013069	NPBWR2	neuropeptides B and W receptor 2 [Source:NCBI gene;Acc:105103424]
S1PR4	sphingosine-1-phosphate receptor 4	gpcr	Lysophospholipid (S1P) receptors	ENSCDRG00005007083	S1PR4	sphingosine-1-phosphate receptor 4 [Source:HGNC Symbol;Acc:HGNC:3170]
GRPR	gastrin releasing peptide receptor	gpcr	Bombesin receptors	ENSCDRG00005013764	GRPR	gastrin releasing peptide receptor [Source:NCBI gene;Acc:105094989]
GPR42	G protein-coupled receptor 42	gpcr	Class A Orphans	ENSCDRG00005006439	ENSCDRG00005006439	nan
FFAR2	free fatty acid receptor 2	gpcr	Free fatty acid receptors	ENSCDRG00005006351	FFAR2	free fatty acid receptor 2 [Source:HGNC Symbol;Acc:HGNC:4501]
CCR7	C-C motif chemokine receptor 7	gpcr	Chemokine receptors	ENSCDRG00005007460	CCR7	C-C motif chemokine receptor 7 [Source:NCBI gene;Acc:105099015]
AVPR2	arginine vasopressin receptor 2	gpcr	Vasopressin and oxytocin receptors	ENSCDRG00005009433	AVPR2	arginine vasopressin receptor 2 [Source:HGNC Symbol;Acc:HGNC:897]
ADGRE2	adhesion G protein-coupled receptor E2	gpcr	Adhesion Class GPCRs	ENSCDRG00005012580	ENSCDRG00005012580	nan
F2RL3	F2R like thrombin or trypsin receptor 3	gpcr	Proteinase-activated receptors	ENSCDRG00005021339	F2RL3	F2R like thrombin or trypsin receptor 3 [Source:HGNC Symbol;Acc:HGNC:3540]
ADORA2A	adenosine A2a receptor	gpcr	Adenosine receptors	ENSCDRG00005022047	ADORA2A	adenosine A2a receptor [Source:NCBI gene;Acc:105095191]
MCHR1	melanin concentrating hormone receptor 1	gpcr	Melanin-concentrating hormone receptors	ENSCDRG00005016289	MCHR1	melanin concentrating hormone receptor 1 [Source:HGNC Symbol;Acc:HGNC:4479]
SMO	smoothened, frizzled class receptor	gpcr	Class Frizzled GPCRs	ENSCDRG00005000133	ENSCDRG00005000133	nan
OPN1SW	opsin 1, short wave sensitive	gpcr	Opsin receptors	ENSCDRG00005006689	OPN1SW	opsin 1, short wave sensitive [Source:NCBI gene;Acc:105085366]
ACKR4	atypical chemokine receptor 4	gpcr	Chemokine receptors	ENSCDRG00005004955	ACKR4	atypical chemokine receptor 4 [Source:NCBI gene;Acc:105095635]
MAS1	MAS1 proto-oncogene, G protein-coupled receptor	gpcr	Class A Orphans	ENSCDRG00005014532	MAS1	MAS1 proto-oncogene, G protein-coupled receptor [Source:HGNC Symbol;Acc:HGNC:6899]
ADGRE3	adhesion G protein-coupled receptor E3	gpcr	Adhesion Class GPCRs	ENSCDRG00005013272	ADGRE3	adhesion G protein-coupled receptor E3 [Source:NCBI gene;Acc:105105978]
NMUR2	neuromedin U receptor 2	gpcr	Neuromedin U receptors	ENSCDRG00005001477	NMUR2	neuromedin U receptor 2 [Source:NCBI gene;Acc:105095157]
GPR12	G protein-coupled receptor 12	gpcr	Class A Orphans	ENSCDRG00005021787	GPR12	G protein-coupled receptor 12 [Source:HGNC Symbol;Acc:HGNC:4466]
CHRM3	cholinergic receptor muscarinic 3	gpcr	Acetylcholine receptors (muscarinic)	ENSCDRG00005016235	CHRM3	cholinergic receptor muscarinic 3 [Source:HGNC Symbol;Acc:HGNC:1952]
LGR6	leucine rich repeat containing G protein-coupled receptor 6	gpcr	Class A Orphans	ENSCDRG00005019877	LGR6	leucine rich repeat containing G protein-coupled receptor 6 [Source:HGNC Symbol;Acc:HGNC:19719]
RXFP2	relaxin family peptide receptor 2	gpcr	Relaxin family peptide receptors	ENSCDRG00005005532	RXFP2	relaxin family peptide receptor 2 [Source:HGNC Symbol;Acc:HGNC:17318]
HRH4	histamine receptor H4	gpcr	Histamine receptors	ENSCDRG00005017544	HRH4	histamine receptor H4 [Source:NCBI gene;Acc:105086550]
MTNR1B	melatonin receptor 1B	gpcr	Melatonin receptors	ENSCDRG00005011909	MTNR1B	melatonin receptor 1B [Source:NCBI gene;Acc:105094616]
APLNR	apelin receptor	gpcr	Apelin receptor	ENSCDRG00005002219	APLNR	apelin receptor [Source:HGNC Symbol;Acc:HGNC:339]
C5AR2	complement component 5a receptor 2	gpcr	Complement peptide receptors	ENSCDRG00005000932	C5AR2	complement component 5a receptor 2 [Source:HGNC Symbol;Acc:HGNC:4527]
ADGRB3	adhesion G protein-coupled receptor B3	gpcr	Adhesion Class GPCRs	ENSCDRG00005020890	ADGRB3	adhesion G protein-coupled receptor B3 [Source:HGNC Symbol;Acc:HGNC:945]
HTR1B	5-hydroxytryptamine receptor 1B	gpcr	5-Hydroxytryptamine receptors	ENSCDRG00005020265	HTR1B	5-hydroxytryptamine receptor 1B [Source:NCBI gene;Acc:105104748]
TAAR5	trace amine associated receptor 5	gpcr	Class A Orphans	ENSCDRG00005021823	TAAR5	trace amine associated receptor 5 [Source:NCBI gene;Acc:105096349]
NMBR	neuromedin B receptor	gpcr	Bombesin receptors	ENSCDRG00005012486	NMBR	neuromedin B receptor [Source:NCBI gene;Acc:105092054]
GPR55	G protein-coupled receptor 55	gpcr	Class A Orphans	ENSCDRG00005005515	GPR55	G protein-coupled receptor 55 [Source:NCBI gene;Acc:105093757]
HTR2B	5-hydroxytryptamine receptor 2B	gpcr	5-Hydroxytryptamine receptors	ENSCDRG00005005627	HTR2B	5-hydroxytryptamine receptor 2B [Source:NCBI gene;Acc:105093754]
EDNRB	endothelin receptor type B	gpcr	Endothelin receptors	ENSCDRG00005009727	EDNRB	endothelin receptor type B [Source:NCBI gene;Acc:105103153]
GABBR2	gamma-aminobutyric acid type B receptor subunit 2	gpcr	GABA<sub>B</sub> receptors	ENSCDRG00005000057	GABBR2	gamma-aminobutyric acid type B receptor subunit 2 [Source:HGNC Symbol;Acc:HGNC:4507]
HCRTR2	hypocretin receptor 2	gpcr	Orexin receptors	ENSCDRG00005014448	HCRTR2	hypocretin receptor 2 [Source:NCBI gene;Acc:105102121]
LHCGR	luteinizing hormone/choriogonadotropin receptor	gpcr	Glycoprotein hormone receptors	ENSCDRG00005022386	ENSCDRG00005022386	luteinizing hormone/choriogonadotropin receptor [Source:NCBI gene;Acc:105092350]
GPR87	G protein-coupled receptor 87	gpcr	Class A Orphans	ENSCDRG00005016755	GPR87	G protein-coupled receptor 87 [Source:HGNC Symbol;Acc:HGNC:4538]
LGR5	leucine rich repeat containing G protein-coupled receptor 5	gpcr	Class A Orphans	ENSCDRG00005018226	LGR5	leucine rich repeat containing G protein-coupled receptor 5 [Source:HGNC Symbol;Acc:HGNC:4504]
GPR84	G protein-coupled receptor 84	gpcr	Class A Orphans	ENSCDRG00005003688	GPR84	G protein-coupled receptor 84 [Source:NCBI gene;Acc:105101005]
LPAR6	lysophosphatidic acid receptor 6	gpcr	Lysophospholipid (LPA) receptors	ENSCDRG00005006495	LPAR6	lysophosphatidic acid receptor 6 [Source:NCBI gene;Acc:105101802]
SSTR1	somatostatin receptor 1	gpcr	Somatostatin receptors	ENSCDRG00005018396	SSTR1	somatostatin receptor 1 [Source:HGNC Symbol;Acc:HGNC:11330]
GPR65	G protein-coupled receptor 65	gpcr	Class A Orphans	ENSCDRG00005003153	GPR65	G protein-coupled receptor 65 [Source:NCBI gene;Acc:105105381]
CELSR2	cadherin EGF LAG seven-pass G-type receptor 2	gpcr	Adhesion Class GPCRs	ENSCDRG00005002740	CELSR2	cadherin EGF LAG seven-pass G-type receptor 2 [Source:HGNC Symbol;Acc:HGNC:3231]
GPR161	G protein-coupled receptor 161	gpcr	Class A Orphans	ENSCDRG00005007590	GPR161	G protein-coupled receptor 161 [Source:HGNC Symbol;Acc:HGNC:23694]
GPR17	G protein-coupled receptor 17	gpcr	Class A Orphans	ENSCDRG00005003850	GPR17	G protein-coupled receptor 17 [Source:NCBI gene;Acc:105084489]
PTH2R	parathyroid hormone 2 receptor	gpcr	Parathyroid hormone receptors	ENSCDRG00005014818	PTH2R	parathyroid hormone 2 receptor [Source:HGNC Symbol;Acc:HGNC:9609]
ACKR3	atypical chemokine receptor 3	gpcr	Chemokine receptors	ENSCDRG00005014249	ACKR3	atypical chemokine receptor 3 [Source:NCBI gene;Acc:105085551]
ACKR2	atypical chemokine receptor 2	gpcr	Chemokine receptors	ENSCDRG00005020580	ACKR2	atypical chemokine receptor 2 [Source:HGNC Symbol;Acc:HGNC:1565]
ADGRG7	adhesion G protein-coupled receptor G7	gpcr	Adhesion Class GPCRs	ENSCDRG00005002047	ADGRG7	adhesion G protein-coupled receptor G7 [Source:NCBI gene;Acc:105087726]
AGTR1	angiotensin II receptor type 1	gpcr	Angiotensin receptors	ENSCDRG00005013859	AGTR1	angiotensin II receptor type 1 [Source:HGNC Symbol;Acc:HGNC:336]
GPR6	G protein-coupled receptor 6	gpcr	Class A Orphans	ENSCDRG00005006404	GPR6	G protein-coupled receptor 6 [Source:NCBI gene;Acc:105097106]
TAAR2	trace amine associated receptor 2	gpcr	Class A Orphans	ENSCDRG00005021814	TAAR2	trace amine associated receptor 2 (gene/pseudogene) [Source:HGNC Symbol;Acc:HGNC:4514]
TAAR6	trace amine associated receptor 6	gpcr	Class A Orphans	ENSCDRG00005021828	TAAR6	trace amine associated receptor 6 [Source:HGNC Symbol;Acc:HGNC:20978]
TAAR8	trace amine associated receptor 8	gpcr	Class A Orphans	ENSCDRG00005021824	ENSCDRG00005021824	trace amine-associated receptor 8 [Source:NCBI gene;Acc:105096346]
[truncated: 223 more rows]

## Sheet: f
Classification of camel SON basal genes - nuclear hormone receptors
[truncated: 49 more rows]

## Sheet: g
Classification of camel SON basal genes - ion channels
[truncated: 265 more rows]

[truncated: 3 more sheets: h, i, j]
