# Supplementary material for: Transcriptomic plasticity of the hypothalamic osmoregulatory control centre of the Arabian dromedary camel
Source: Commun Biol. 2022 Sep 23;5:1008. doi: 10.1038/s42003-022-03857-0 (PMC9508118; doi:10.1038/s42003-022-03857-0)
Supplement: Supplementary file 7 — Supplementary Data S4 [file 42003_2022_3857_MOESM7_ESM.xlsx]

## Sheet: a
Gene ontology (GO) of all camel DEGs: biological processes (BPs)										Gene ontology (GO) of all camel DEGs: KEGG pathways
GO: BP term ID	Description	GeneRatio	BgRatio	pvalue	p.adjust	qvalue	geneID	Count		KEGG pathway ID	Description	GeneRatio	BgRatio	pvalue	p.adjust	qvalue	geneID	Count
GO:0050804	modulation of chemical synaptic transmission	18/183	439/15278	5.63314e-06	0.00624579	0.00561016	SLC7A11/CAMK2A/CHRM2/AGT/PRKCG/SYT9/LRP8/SLC4A8/SYN3/ATF4/DLG4/ADCY8/ARC/VGF/RNF216/UNC13A/SYT4/ADRA1A	18		hsa04141	Protein processing in endoplasmic reticulum	11/99	159/6840	1.63662e-05	0.00342055	0.00301484	SSR3/PDIA4/ATF4/P4HB/ERN1/RPN2/HSPA1B/SELENOS/PRKCSH/ERP29/CRYAB	11
GO:0099177	regulation of trans-synaptic signaling	18/183	440/15278	5.8126e-06	0.00624579	0.00561016	SLC7A11/CAMK2A/CHRM2/AGT/PRKCG/SYT9/LRP8/SLC4A8/SYN3/ATF4/DLG4/ADCY8/ARC/VGF/RNF216/UNC13A/SYT4/ADRA1A	18		hsa04911	Insulin secretion	7/99	82/6840	0.000168339	0.0170981	0.0150701	CCKAR/CAMK2A/ADCYAP1R1/RYR2/PRKCG/ATF4/ADCY8	7
GO:0050890	cognition	14/183	284/15278	8.38895e-06	0.00624579	0.00561016	KCNAB1/SLC7A11/B2M/FOS/AGT/PRKCG/NRXN2/MFSD2A/THRA/DLG4/OPRL1/ADCY8/ARC/SYT4	14		hsa05031	Amphetamine addiction	6/99	63/6840	0.000275522	0.0170981	0.0150701	CAMK2A/FOS/PRKCG/ATF4/PDYN/ARC	6
GO:0007611	learning or memory	13/183	246/15278	8.46313e-06	0.00624579	0.00561016	KCNAB1/SLC7A11/B2M/FOS/AGT/PRKCG/NRXN2/THRA/DLG4/OPRL1/ADCY8/ARC/SYT4	13		hsa05150	Staphylococcus aureus infection	6/99	65/6840	0.000327236	0.0170981	0.0150701	CFI/C1QA/C1QC/C1QB/HLA-DQB1/FCGR3B	6
GO:0051591	response to cAMP	8/183	89/15278	1.12297e-05	0.00663004	0.00595531	CITED1/FOS/IGFBP5/PTPRN/ASS1/COL1A1/NME1/VGF	8		hsa04725	Cholinergic synapse	7/99	106/6840	0.000813606	0.0299085	0.0263611	CAMK2A/FOS/CHRM2/PRKCG/ATF4/KCNQ2/ADCY8	7
GO:0048168	regulation of neuronal synaptic plasticity	6/183	48/15278	2.19865e-05	0.0108174	0.00971649	CAMK2A/AGT/DLG4/ARC/UNC13A/SYT4	6		hsa04261	Adrenergic signaling in cardiomyocytes	8/99	139/6840	0.000858618	0.0299085	0.0263611	ADRA1B/CAMK2A/AGT/RYR2/ATF4/ADCY8/CREM/ADRA1A	8
GO:0046928	regulation of neurotransmitter secretion	8/183	103/15278	3.27899e-05	0.0120377	0.0108127	CAMK2A/CHRM2/PRKCG/SYT9/SLC4A8/UNC13A/SYT4/ADRA1A	8		hsa04080	Neuroactive ligand-receptor interaction	12/99	308/6840	0.00153279	0.0453437	0.0399655	CCKAR/ADRA1B/ADCYAP1R1/CHRM2/AGT/GABBR2/NPB/CRHR1/THRA/PDYN/OPRL1/ADRA1A	12
GO:0007269	neurotransmitter secretion	10/183	169/15278	3.67004e-05	0.0120377	0.0108127	CAMK2A/CHRM2/PRKCG/NRXN2/SYT9/SLC4A8/SYN3/UNC13A/SYT4/ADRA1A	10		hsa04142	Lysosome	7/99	123/6840	0.00194225	0.0453437	0.0399655	GLA/FUCA1/ATP6V0B/CD63/CTSA/CTSS/GBA	7
GO:0099643	signal release from synapse	10/183	169/15278	3.67004e-05	0.0120377	0.0108127	CAMK2A/CHRM2/PRKCG/NRXN2/SYT9/SLC4A8/SYN3/UNC13A/SYT4/ADRA1A	10		hsa04713	Circadian entrainment	6/99	91/6840	0.0019526	0.0453437	0.0399655	CAMK2A/FOS/ADCYAP1R1/RYR2/PRKCG/ADCY8	6
GO:0014074	response to purine-containing compound	9/183	138/15278	4.24221e-05	0.012523	0.0112486	CITED1/FOS/IGFBP5/PTPRN/RYR2/ASS1/COL1A1/NME1/VGF	9		hsa05146	Amoebiasis	6/99	94/6840	0.00230368	0.0481468	0.0424361	COL3A1/PRKCG/COL1A1/LAMB3/LAMC2/SERPINB10	6
GO:0006836	neurotransmitter transport	11/183	222/15278	7.60301e-05	0.0200698	0.0180273	CAMK2A/SV2C/CHRM2/PRKCG/NRXN2/SYT9/SLC4A8/SYN3/UNC13A/SYT4/ADRA1A	11		hsa04610	Complement and coagulation cascades	5/99	75/6840	0.00445007	0.0796471	0.0702001	CFI/VSIG4/C1QA/C1QC/C1QB	5
GO:0051588	regulation of neurotransmitter transport	8/183	117/15278	8.15844e-05	0.0200698	0.0180273	CAMK2A/CHRM2/PRKCG/SYT9/SLC4A8/UNC13A/SYT4/ADRA1A	8		hsa04612	Antigen processing and presentation	4/99	47/6840	0.00457304	0.0796471	0.0702001	B2M/HSPA1B/HLA-DQB1/CTSS	4
GO:0046683	response to organophosphorus	8/183	123/15278	0.000115938	0.0263268	0.0236475	CITED1/FOS/IGFBP5/PTPRN/ASS1/COL1A1/NME1/VGF	8		hsa04020	Calcium signaling pathway	9/99	229/6840	0.00570399	0.0917026	0.0808258	CCKAR/ADRA1B/CAMK2A/CHRM2/RET/RYR2/PRKCG/ADCY8/ADRA1A	9
GO:0002920	regulation of humoral immune response	6/183	71/15278	0.000204364	0.0430915	0.0387062	CFI/VSIG4/KLK7/C1QA/C1QC/C1QB	6		hsa04512	ECM-receptor interaction	5/99	83/6840	0.00683793	0.102081	0.0899727	SPP1/SV2C/COL1A1/LAMB3/LAMC2	5
GO:0097066	response to thyroid hormone	4/183	26/15278	0.000242297	0.0476841	0.0428313	ANXA2/LMO2/CTSS/GBA	4		hsa05322	Systemic lupus erythematosus	5/99	87/6840	0.00831753	0.115891	0.102145	C1QA/C1QC/C1QB/HLA-DQB1/FCGR3B	5
GO:0098883	synapse pruning	3/183	11/15278	0.000259889	0.0479494	0.0430697	C1QA/C1QC/C1QB	3		hsa04925	Aldosterone synthesis and secretion	5/99	90/6840	0.0095637	0.117577	0.103631	CAMK2A/AGT/PRKCG/ATF4/ADCY8	5
GO:0010975	regulation of neuron projection development	16/183	491/15278	0.000281502	0.0488821	0.0439074	SPP1/SEMA5A/B2M/PLXNA4/RET/AGT/MFSD2A/LRP8/LGALS1/RAP1GAP2/NME1/DLG4/CPNE5/ARC/UNC13A/SYT4	16		hsa04974	Protein digestion and absorption	5/99	90/6840	0.0095637	0.117577	0.103631	COL3A1/SLC3A2/SLC38A2/COL1A1/ELN	5
GO:2000300	regulation of synaptic vesicle exocytosis	6/183	77/15278	0.000318862	0.0499485	0.0448653	CHRM2/PRKCG/SYT9/SLC4A8/SYT4/ADRA1A	6		hsa04720	Long-term potentiation	4/99	62/6840	0.0121333	0.140881	0.124171	CAMK2A/PRKCG/ATF4/ADCY8	4
GO:0048167	regulation of synaptic plasticity	9/183	181/15278	0.00033494	0.0499485	0.0448653	CAMK2A/AGT/ATF4/DLG4/ADCY8/ARC/VGF/UNC13A/SYT4	9		hsa04216	Ferroptosis	3/99	35/6840	0.0137671	0.151438	0.133476	SLC7A11/SAT1/SLC3A2	3
GO:0038003	opioid receptor signaling pathway	3/183	12/15278	0.000343469	0.0499485	0.0448653	OGFRL1/OPRL1/ADCY8	3		hsa05133	Pertussis	4/99	70/6840	0.0182759	0.190984	0.168331	FOS/C1QA/C1QC/C1QB	4
GO:0045666	positive regulation of neuron differentiation	13/183	355/15278	0.000355325	0.0499485	0.0448653	ETV5/SEMA5A/PLXNA4/RET/AGT/HEYL/LRP8/NME1/DLG4/RNF112/CPNE5/UNC13A/SYT4	13		hsa04918	Thyroid hormone synthesis	4/99	72/6840	0.0200647	0.199483	0.175822	PDIA4/PRKCG/ATF4/ADCY8	4
GO:0030199	collagen fibril organization	5/183	52/15278	0.000384541	0.0514237	0.0461903	ANXA2/COL3A1/COL1A1/ACAN/ADAMTS2	5		hsa04970	Salivary secretion	4/99	73/6840	0.0209982	0.199483	0.175822	ADRA1B/PRKCG/ADCY8/ADRA1A	4
GO:0001505	regulation of neurotransmitter levels	10/183	226/15278	0.000400659	0.0514237	0.0461903	CAMK2A/CHRM2/PRKCG/NRXN2/SYT9/SLC4A8/SYN3/UNC13A/SYT4/ADRA1A	10		hsa04024	cAMP signaling pathway	7/99	202/6840	0.0266849	0.237661	0.209472	CAMK2A/FOS/ADCYAP1R1/CHRM2/RYR2/GABBR2/ADCY8	7
GO:0030449	regulation of complement activation	5/183	53/15278	0.00042052	0.051724	0.0464601	CFI/VSIG4/C1QA/C1QC/C1QB	5		hsa00511	Other glycan degradation	2/99	18/6840	0.0272913	0.237661	0.209472	FUCA1/GBA	2
GO:0043434	response to peptide hormone	14/183	415/15278	0.000482803	0.0539937	0.0484989	CITED1/CAMK2A/IGFBP5/PTPRN/AGT/ATP6V0B/ASS1/RANGAP1/CRHR1/COL1A1/ADCY8/VGF/SELENOS/ECHDC3	14		hsa05110	Vibrio cholerae infection	3/99	46/6840	0.0284981	0.238244	0.209986	PDIA4/ATP6V0B/KDELR2	3
GO:0016079	synaptic vesicle exocytosis	7/183	116/15278	0.000490578	0.0539937	0.0484989	CHRM2/PRKCG/SYT9/SLC4A8/UNC13A/SYT4/ADRA1A	7		hsa05030	Cocaine addiction	3/99	47/6840	0.0301293	0.242193	0.213467	ATF4/DLG4/PDYN	3
GO:0070059	intrinsic apoptotic signaling pathway in response to endoplasmic reticulum stress	5/183	56/15278	0.000543788	0.0539937	0.0484989	CHAC1/ATF4/ERN1/SELENOS/ERP29	5		hsa04926	Relaxin signaling pathway	5/99	122/6840	0.0314945	0.242325	0.213582	FOS/COL3A1/ATF4/COL1A1/ADCY8	5
GO:0030198	extracellular matrix organization	13/183	372/15278	0.000552944	0.0539937	0.0484989	SPP1/ANXA2/COL3A1/AGT/KLK7/LCP1/COL1A1/LAMB3/ELN/CTSS/LAMC2/ACAN/ADAMTS2	13		hsa04915	Estrogen signaling pathway	5/99	123/6840	0.0324645	0.242325	0.213582	FOS/GABBR2/ATF4/HSPA1B/ADCY8	5
GO:0016137	glycoside metabolic process	3/183	14/15278	0.000558336	0.0539937	0.0484989	GLA/FUCA1/GBA	3		hsa04270	Vascular smooth muscle contraction	5/99	125/6840	0.0344604	0.248352	0.218895	ADRA1B/AGT/PRKCG/ADCY8/ADRA1A	5
GO:0051775	response to redox state	3/183	14/15278	0.000558336	0.0539937	0.0484989	SLC7A11/RYR2/SELENOS	3		hsa04614	Renin-angiotensin system	2/99	21/6840	0.0364255	0.248752	0.219248	AGT/CTSA	2
GO:0043062	extracellular structure organization	13/183	373/15278	0.000567007	0.0539937	0.0484989	SPP1/ANXA2/COL3A1/AGT/KLK7/LCP1/COL1A1/LAMB3/ELN/CTSS/LAMC2/ACAN/ADAMTS2	13		hsa04727	GABAergic synapse	4/99	87/6840	0.0368962	0.248752	0.219248	PRKCG/GABBR2/SLC38A2/ADCY8	4
GO:0002455	humoral immune response mediated by circulating immunoglobulin	5/183	59/15278	0.000692398	0.0638737	0.0573733	CFI/C1QA/C1QC/C1QB/HLA-DQB1	5		hsa04972	Pancreatic secretion	4/99	93/6840	0.0453641	0.296284	0.261142	CCKAR/RYR2/PRKCG/ADCY8	4
GO:0006687	glycosphingolipid metabolic process	5/183	61/15278	0.000807088	0.0717732	0.064469	GLA/ST6GALNAC5/CTSA/GBA/CREM	5		hsa04922	Glucagon signaling pathway	4/99	95/6840	0.0484094	0.301579	0.265809	SIK1/CAMK2A/PYGM/ATF4	4
GO:0010038	response to metal ion	12/183	340/15278	0.000826657	0.0717732	0.064469	PAM/B2M/FOS/RYR2/SYT9/C1QA/ASS1/ATF4/DLG4/CPNE5/ADCY8/SYT4	12		hsa05142	Chagas disease	4/99	96/6840	0.0499736	0.301579	0.265809	FOS/C1QA/C1QC/C1QB	4
GO:0007200	phospholipase C-activating G protein-coupled receptor signaling pathway	6/183	93/15278	0.000875657	0.0738554	0.0663392	CCKAR/ADRA1B/CHRM2/AGT/OPRL1/ADRA1A	6		hsa04213	Longevity regulating pathway - multiple species	3/99	59/6840	0.0534158	0.301579	0.265809	HSPA1B/ADCY8/CRYAB	3
GO:0048259	regulation of receptor-mediated endocytosis	6/183	95/15278	0.000978976	0.0802761	0.0721065	ANXA2/B2M/SFRP4/CD63/DLG4/ARC	6		hsa04927	Cortisol synthesis and secretion	3/99	59/6840	0.0534158	0.301579	0.265809	AGT/ATF4/ADCY8	3
GO:0019377	glycolipid catabolic process	3/183	17/15278	0.00101581	0.0809637	0.0727241	GLA/FUCA1/GBA	3		hsa04921	Oxytocin signaling pathway	5/99	142/6840	0.0544954	0.301579	0.265809	CAMK2A/FOS/RYR2/PRKCG/ADCY8	5
GO:0099003	vesicle-mediated transport in synapse	9/183	212/15278	0.00104424	0.0809637	0.0727241	CHRM2/PRKCG/SYT9/SLC4A8/SYN3/ARC/UNC13A/SYT4/ADRA1A	9		hsa05145	Toxoplasmosis	4/99	99/6840	0.0548325	0.301579	0.265809	HSPA1B/HLA-DQB1/LAMB3/LAMC2	4
GO:0001941	postsynaptic membrane organization	4/183	38/15278	0.00106964	0.0809637	0.0727241	ETV5/SLC7A11/NRXN2/DLG4	4		hsa04929	GnRH secretion	3/99	61/6840	0.0579418	0.305954	0.269665	SPP1/PRKCG/GABBR2	3
GO:0071248	cellular response to metal ion	8/183	172/15278	0.00110459	0.0815188	0.0732227	B2M/FOS/SYT9/ATF4/DLG4/CPNE5/ADCY8/SYT4	8		hsa04934	Cushing syndrome	5/99	146/6840	0.0600196	0.305954	0.269665	CAMK2A/AGT/ATF4/CRHR1/ADCY8	5
GO:0032355	response to estradiol	7/183	134/15278	0.00115374	0.0830695	0.0746156	PAM/ADCYAP1R1/AGT/ASS1/COL1A1/OPRL1/CRYAB	7		hsa05152	Tuberculosis	5/99	146/6840	0.0600196	0.305954	0.269665	CAMK2A/ATP6V0B/HLA-DQB1/CTSS/FCGR3B	5
GO:0007565	female pregnancy	8/183	175/15278	0.00123421	0.0867475	0.0779193	SPP1/PAM/FOS/IGFBP5/AGT/ACVR1B/SLC38A2/CRHR1	8		hsa04928	Parathyroid hormone synthesis, secretion and action	4/99	103/6840	0.0616961	0.307011	0.270597	FOS/PRKCG/ATF4/ADCY8	4
GO:0050808	synapse organization	13/183	409/15278	0.00131855	0.0877474	0.0788175	ETV5/SLC7A11/LRRC4B/NRXN2/C1QA/C1QC/C1QB/LRP8/DLG4/MDGA1/ARC/UNC13A/LRTM2	13		hsa05140	Leishmaniasis	3/99	64/6840	0.0650597	0.316221	0.278714	FOS/HLA-DQB1/FCGR3B	3
GO:0006664	glycolipid metabolic process	6/183	101/15278	0.00134583	0.0877474	0.0788175	GLA/FUCA1/ST6GALNAC5/CTSA/GBA/CREM	6		hsa04940	Type I diabetes mellitus	2/99	30/6840	0.0694213	0.329751	0.29064	PTPRN/HLA-DQB1	2
GO:0010959	regulation of metal ion transport	12/183	361/15278	0.0013822	0.0877474	0.0788175	KCNAB1/SIK1/CAMK2A/B2M/DPP10/ADCYAP1R1/AGT/RYR2/CD63/ATF4/CRHR1/OPRL1	12		hsa04724	Glutamatergic synapse	4/99	109/6840	0.0728046	0.338137	0.298031	PRKCG/SLC38A2/DLG4/ADCY8	4
GO:1903509	liposaccharide metabolic process	6/183	102/15278	0.00141598	0.0877474	0.0788175	GLA/FUCA1/ST6GALNAC5/CTSA/GBA/CREM	6		hsa04935	Growth hormone synthesis, secretion and action	4/99	113/6840	0.0807409	0.366845	0.323333	FOS/PRKCG/ATF4/ADCY8	4
GO:0150146	cell junction disassembly	3/183	19/15278	0.00142226	0.0877474	0.0788175	C1QA/C1QC/C1QB	3		hsa04971	Gastric acid secretion	3/99	72/6840	0.0858774	0.38188	0.336586	CAMK2A/PRKCG/ADCY8	3
GO:0007612	learning	7/183	139/15278	0.00142679	0.0877474	0.0788175	SLC7A11/FOS/AGT/NRXN2/DLG4/OPRL1/ARC	7		hsa00250	Alanine, aspartate and glutamate metabolism	2/99	35/6840	0.0906957	0.394904	0.348065	ASRGL1/ASS1	2
GO:0042493	response to drug	12/183	367/15278	0.0015883	0.0956873	0.0859493	PAM/B2M/FOS/ADCYAP1R1/RET/LRP8/ASS1/LGALS1/COL1A1/NME1/RPN2/ADRA1A	12		hsa05323	Rheumatoid arthritis	3/99	75/6840	0.0943317	0.402354	0.354631	FOS/ATP6V0B/HLA-DQB1	3
GO:0010976	positive regulation of neuron projection development	10/183	272/15278	0.00165154	0.097507	0.0875838	SEMA5A/PLXNA4/RET/AGT/LRP8/NME1/DLG4/CPNE5/UNC13A/SYT4	10		hsa04145	Phagosome	4/99	123/6840	0.102364	0.42788	0.377129	ATP6V0B/HLA-DQB1/CTSS/FCGR3B	4
GO:0006956	complement activation	5/183	73/15278	0.00181572	0.105098	0.0944027	CFI/VSIG4/C1QA/C1QC/C1QB	5		hsa04210	Apoptosis	4/99	125/6840	0.106981	0.429983	0.378982	FOS/ATF4/ERN1/CTSS	4
GO:0060537	muscle tissue development	12/183	375/15278	0.00190197	0.106834	0.0959614	KCNAB1/SIK1/FOS/COL3A1/IGFBP5/AGT/RYR2/HEYL/PGM5/ELN/FHOD3/ADRA1A	12		hsa04728	Dopaminergic synapse	4/99	125/6840	0.106981	0.429983	0.378982	CAMK2A/FOS/PRKCG/ATF4	4
GO:1903861	positive regulation of dendrite extension	3/183	21/15278	0.00191808	0.106834	0.0959614	CPNE5/UNC13A/SYT4	3		hsa04010	MAPK signaling pathway	7/99	287/6840	0.121315	0.469425	0.413747	DUSP9/FOS/PRKCG/ATF4/RASGRP3/HSPA1B/EFNA3	7
GO:0071277	cellular response to calcium ion	5/183	75/15278	0.00204674	0.111763	0.100389	FOS/SYT9/CPNE5/ADCY8/SYT4	5		hsa05020	Prion disease	6/99	234/6840	0.122739	0.469425	0.413747	RYR2/C1QA/C1QC/C1QB/ATF4/HSPA1B	6
GO:0098693	regulation of synaptic vesicle cycle	6/183	110/15278	0.0020823	0.111763	0.100389	CHRM2/PRKCG/SYT9/SLC4A8/SYT4/ADRA1A	6		hsa05171	Coronavirus disease - COVID-19	5/99	184/6840	0.127517	0.469425	0.413747	FOS/PRKCG/C1QA/C1QC/C1QB	5
GO:0099504	synaptic vesicle cycle	8/183	191/15278	0.00214466	0.113054	0.101549	CHRM2/PRKCG/SYT9/SLC4A8/SYN3/UNC13A/SYT4/ADRA1A	8		hsa00970	Aminoacyl-tRNA biosynthesis	2/99	43/6840	0.127973	0.469425	0.413747	TARS1/LARS2	2
GO:0001956	positive regulation of neurotransmitter secretion	3/183	22/15278	0.00220151	0.114015	0.102412	SYT9/SLC4A8/UNC13A	3		hsa04912	GnRH signaling pathway	3/99	86/6840	0.128025	0.469425	0.413747	CAMK2A/ATF4/ADCY8	3
GO:0030100	regulation of endocytosis	8/183	194/15278	0.00236272	0.118946	0.106841	ANXA2/B2M/SFRP4/CDH13/CD63/DLG4/ARC/SYT4	8		hsa00983	Drug metabolism - other enzymes	2/99	44/6840	0.132858	0.478746	0.421962	NME1/UCK2	2
GO:0006958	complement activation, classical pathway	4/183	47/15278	0.00237732	0.118946	0.106841	CFI/C1QA/C1QC/C1QB	4		hsa05032	Morphine addiction	3/99	89/6840	0.137876	0.488408	0.430478	PRKCG/GABBR2/ADCY8	3
GO:0048791	calcium ion-regulated exocytosis of neurotransmitter	3/183	23/15278	0.00250959	0.119824	0.10763	SYT9/UNC13A/SYT4	3		hsa05414	Dilated cardiomyopathy	3/99	91/6840	0.144584	0.491898	0.433554	AGT/RYR2/ADCY8	3
GO:1903859	regulation of dendrite extension	3/183	23/15278	0.00250959	0.119824	0.10763	CPNE5/UNC13A/SYT4	3		hsa04510	Focal adhesion	5/99	193/6840	0.147187	0.491898	0.433554	SPP1/PRKCG/COL1A1/LAMB3/LAMC2	5
GO:1901652	response to peptide	14/183	494/15278	0.00252927	0.119824	0.10763	CITED1/CAMK2A/IGFBP5/PTPRN/AGT/ATP6V0B/ASS1/RANGAP1/CRHR1/COL1A1/ADCY8/VGF/SELENOS/ECHDC3	14		hsa04750	Inflammatory mediator regulation of TRP channels	3/99	92/6840	0.147978	0.491898	0.433554	CAMK2A/PRKCG/ADCY8	3
GO:0001558	regulation of cell growth	12/183	389/15278	0.00257271	0.119824	0.10763	SPP1/SEMA5A/IGFBP5/PLXNA4/AGT/MFSD2A/ACVR1B/HSPA1B/CPNE5/UNC13A/SYT4/CRYAB	12		hsa00130	Ubiquinone and other terpenoid-quinone biosynthesis	1/99	6840-11-01	0.148275	0.491898	0.433554	VKORC1	1
GO:0071241	cellular response to inorganic substance	8/183	197/15278	0.00259781	0.119824	0.10763	B2M/FOS/SYT9/ATF4/DLG4/CPNE5/ADCY8/SYT4	8		hsa00600	Sphingolipid metabolism	2/99	48/6840	0.1528	0.497886	0.438831	GLA/GBA	2
GO:0044706	multi-multicellular organism process	8/183	199/15278	0.00276444	0.123988	0.11137	SPP1/PAM/FOS/IGFBP5/AGT/ACVR1B/SLC38A2/CRHR1	8		hsa05231	Choline metabolism in cancer	3/99	94/6840	0.154845	0.497886	0.438831	DGKG/FOS/PRKCG	3
GO:0048260	positive regulation of receptor-mediated endocytosis	4/183	49/15278	0.00277208	0.123988	0.11137	ANXA2/B2M/SFRP4/CD63	4		hsa04916	Melanogenesis	3/99	95/6840	0.158316	0.501332	0.441869	CAMK2A/PRKCG/ADCY8	3
GO:0060384	innervation	3/183	24/15278	0.00284304	0.125263	0.112516	RET/PRKCG/UNC13A	3		hsa05166	Human T-cell leukemia virus 1 infection	5/99	199/6840	0.160987	0.501826	0.442304	B2M/FOS/ATF4/HLA-DQB1/ADCY8	5
GO:0006457	protein folding	8/183	203/15278	0.00312271	0.135135	0.121382	PPIB/B2M/PDIA4/P4HB/HSPA1B/PRKCSH/ERP29/CRYAB	8		hsa05200	Pathways in cancer	10/99	486/6840	0.163909	0.501826	0.442304	CAMK2A/FOS/RET/AGT/PRKCG/HEYL/RASGRP3/ADCY8/LAMB3/LAMC2	10
GO:0050878	regulation of body fluid levels	13/183	452/15278	0.00315864	0.135135	0.121382	DGKG/SLC7A11/ANXA5/PAM/ANXA2/COL3A1/PRKCG/COL1A1/NME1/OPRL1/ADCY8/VKORC1/GBA	13		hsa00240	Pyrimidine metabolism	2/99	51/6840	0.168118	0.501826	0.442304	NME1/UCK2	2
GO:0016049	cell growth	13/183	453/15278	0.00321856	0.135731	0.121918	SPP1/SEMA5A/IGFBP5/PLXNA4/AGT/MFSD2A/ACVR1B/HSPA1B/CPNE5/UNC13A/SYT4/CRYAB/ADRA1A	13		hsa04933	AGE-RAGE signaling pathway in diabetic complications	3/99	99/6840	0.172434	0.501826	0.442304	COL3A1/AGT/COL1A1	3
GO:0050769	positive regulation of neurogenesis	13/183	455/15278	0.00334117	0.138917	0.12478	ETV5/SEMA5A/PLXNA4/RET/AGT/HEYL/LRP8/NME1/DLG4/RNF112/CPNE5/UNC13A/SYT4	13		hsa00604	Glycosphingolipid biosynthesis - ganglio series	1/99	13/6840	0.172793	0.501826	0.442304	ST6GALNAC5	1
GO:0002090	regulation of receptor internalization	4/183	52/15278	0.00344496	0.141243	0.126869	SFRP4/CD63/DLG4/ARC	4		hsa04015	Rap1 signaling pathway	5/99	204/6840	0.172878	0.501826	0.442304	PRKCG/RAP1GAP/RASGRP3/ADCY8/EFNA3	5
GO:0006817	phosphate ion transport	3/183	26/15278	0.00358862	0.142736	0.12821	SFRP4/ATF4/SLC20A1	3		hsa04151	PI3K-Akt signaling pathway	7/99	320/6840	0.180328	0.514945	0.453867	SPP1/CHRM2/ATF4/COL1A1/LAMB3/EFNA3/LAMC2	7
GO:0010460	positive regulation of heart rate	3/183	26/15278	0.00358862	0.142736	0.12821	ADRA1B/RYR2/ADRA1A	3		hsa04022	cGMP-PKG signaling pathway	4/99	154/6840	0.183443	0.514945	0.453867	ADRA1B/ATF4/ADCY8/ADRA1A	4
GO:0099173	postsynapse organization	7/183	164/15278	0.00362641	0.142736	0.12821	ETV5/SLC7A11/LRRC4B/NRXN2/LRP8/DLG4/ARC	7		hsa00603	Glycosphingolipid biosynthesis - globo and isoglobo series	1/99	14/6840	0.184789	0.514945	0.453867	GLA	1
GO:0050806	positive regulation of synaptic transmission	7/183	165/15278	0.00374968	0.145645	0.130823	SYT9/SLC4A8/DLG4/ADCY8/ARC/UNC13A/ADRA1A	7		hsa04066	HIF-1 signaling pathway	3/99	104/6840	0.190565	0.524054	0.461896	CAMK2A/PRKCG/ALDOC	3
GO:0033032	regulation of myeloid cell apoptotic process	3/183	27/15278	0.00400197	0.151459	0.136046	SLC7A11/THRA/SELENOS	3		hsa04730	Long-term depression	2/99	57/6840	0.199459	0.541389	0.477175	PRKCG/CRHR1	2
GO:0051590	positive regulation of neurotransmitter transport	3/183	27/15278	0.00400197	0.151459	0.136046	SYT9/SLC4A8/UNC13A	3		hsa00561	Glycerolipid metabolism	2/99	58/6840	0.204753	0.548634	0.483561	DGKG/GLA	2
GO:0030900	forebrain development	11/183	360/15278	0.0041336	0.154461	0.138741	SLC7A11/CCKAR/SEMA5A/B2M/COL3A1/PLXNA4/CHD5/MFSD2A/LRP8/SLC38A2/NME1	11		hsa04137	Mitophagy - animal	2/99	61/6840	0.220725	0.583943	0.514682	CITED2/ATF4	2
GO:0043113	receptor clustering	4/183	55/15278	0.00422111	0.155094	0.13931	ETV5/SLC7A11/NRXN2/DLG4	4		hsa04924	Renin secretion	2/99	63/6840	0.231432	0.604616	0.532902	ADCYAP1R1/AGT	2
GO:0016064	immunoglobulin mediated immune response	6/183	127/15278	0.00425562	0.155094	0.13931	CFI/FGL2/C1QA/C1QC/C1QB/HLA-DQB1	6		hsa04611	Platelet activation	3/99	116/6840	0.235837	0.606405	0.534479	COL3A1/COL1A1/ADCY8	3
GO:0019724	B cell mediated immunity	6/183	129/15278	0.00459217	0.165318	0.148494	CFI/FGL2/C1QA/C1QC/C1QB/HLA-DQB1	6		hsa04360	Axon guidance	4/99	172/6840	0.237919	0.606405	0.534479	CAMK2A/SEMA5A/PLXNA4/EFNA3	4
GO:0051051	negative regulation of transport	12/183	420/15278	0.00475334	0.166679	0.149716	KCNAB1/SFRP4/ATF4/RANGAP1/CRHR1/DLG4/OPRL1/SELENOS/CABP1/ERP29/SYT4/CRYAB	12		hsa04742	Taste transduction	2/99	65/6840	0.242173	0.609808	0.537479	GABBR2/ADCY8	2
GO:0009991	response to extracellular stimulus	13/183	475/15278	0.00478977	0.166679	0.149716	SIK1/SPP1/FOS/PRKCG/NUCB2/MFSD2A/ASS1/SLC38A2/ATF4/COL1A1/VGF/GBA/TLE5	13		hsa04662	B cell receptor signaling pathway	2/99	67/6840	0.252937	0.619284	0.545831	FOS/RASGRP3	2
GO:0061098	positive regulation of protein tyrosine kinase activity	4/183	57/15278	0.00479935	0.166679	0.149716	AGT/LRP8/DLG4/ADRA1A	4		hsa00220	Arginine biosynthesis	1/99	20/6840	0.25323	0.619284	0.545831	ASS1	1
GO:0051668	localization within membrane	5/183	92/15278	0.00495626	0.170127	0.152813	ETV5/SLC7A11/CDH13/NRXN2/DLG4	5		hsa05165	Human papillomavirus infection	6/99	298/6840	0.262012	0.619284	0.545831	SPP1/HEYL/ATP6V0B/COL1A1/LAMB3/LAMC2	6
GO:0048588	developmental cell growth	8/183	220/15278	0.00506532	0.171724	0.154248	SPP1/SEMA5A/PLXNA4/AGT/CPNE5/UNC13A/SYT4/ADRA1A	8		hsa05170	Human immunodeficiency virus 1 infection	4/99	180/6840	0.263293	0.619284	0.545831	B2M/FOS/PRKCG/SAMHD1	4
GO:0006979	response to oxidative stress	12/183	424/15278	0.00511913	0.171724	0.154248	ETV5/SLC7A11/FOS/PTPRN/ATF4/P4HB/COL1A1/RNF112/HSPA1B/PPP1R15B/SELENOS/CRYAB	12		hsa05214	Glioma	2/99	69/6840	0.263714	0.619284	0.545831	CAMK2A/PRKCG	2
GO:1904062	regulation of cation transmembrane transport	10/183	320/15278	0.00527367	0.17492	0.157119	KCNAB1/DPP10/AGT/RYR2/CD63/CRHR1/DLG4/OPRL1/ARC/CTSS	10		hsa05223	Non-small cell lung cancer	2/99	69/6840	0.263714	0.619284	0.545831	RET/PRKCG	2
GO:0010661	positive regulation of muscle cell apoptotic process	3/183	30/15278	0.00541091	0.175528	0.157664	CAMK2A/AGT/ATF4	3		hsa01230	Biosynthesis of amino acids	2/99	70/6840	0.269105	0.624921	0.550799	ASS1/ALDOC	2
GO:0031338	regulation of vesicle fusion	3/183	30/15278	0.00541091	0.175528	0.157664	ANXA2/SYT9/SYT4	3		hsa05310	Asthma	1/99	22/6840	0.274754	0.627628	0.553185	HLA-DQB1	1
GO:0043312	neutrophil degranulation	12/183	431/15278	0.00581316	0.186527	0.167544	GLA/ANXA2/B2M/FGL2/FUCA1/CD63/ALDOC/CTSA/HSPA1B/CTSS/FCGR3B/SERPINB10	12		hsa04514	Cell adhesion molecules	3/99	127/6840	0.278836	0.627628	0.553185	LRRC4B/NRXN2/HLA-DQB1	3
GO:0033028	myeloid cell apoptotic process	3/183	31/15278	0.00593851	0.1885	0.169316	SLC7A11/THRA/SELENOS	3		hsa04371	Apelin signaling pathway	3/99	128/6840	0.28279	0.627628	0.553185	SPP1/RYR2/ADCY8	3
GO:0002283	neutrophil activation involved in immune response	12/183	433/15278	0.00602462	0.189199	0.169944	GLA/ANXA2/B2M/FGL2/FUCA1/CD63/ALDOC/CTSA/HSPA1B/CTSS/FCGR3B/SERPINB10	12		hsa00534	Glycosaminoglycan biosynthesis - heparan sulfate / heparin	1/99	23/6840	0.285285	0.627628	0.553185	GLCE	1
GO:0051592	response to calcium ion	6/183	138/15278	0.00635369	0.196547	0.176544	FOS/RYR2/SYT9/CPNE5/ADCY8/SYT4	6		hsa05332	Graft-versus-host disease	1/99	23/6840	0.285285	0.627628	0.553185	HLA-DQB1	1
GO:0034976	response to endoplasmic reticulum stress	9/183	278/15278	0.00639176	0.196547	0.176544	CHAC1/PDIA4/ATF4/P4HB/ERN1/PPP1R15B/SELENOS/SDF2L1/ERP29	9		hsa01240	Biosynthesis of cofactors	3/99	130/6840	0.290714	0.631335	0.556453	AFMID/NME1/VKORC1	3
GO:0042119	neutrophil activation	12/183	442/15278	0.00705303	0.201667	0.181143	GLA/ANXA2/B2M/FGL2/FUCA1/CD63/ALDOC/CTSA/HSPA1B/CTSS/FCGR3B/SERPINB10	12		hsa05163	Human cytomegalovirus infection	4/99	190/6840	0.295698	0.631335	0.556453	B2M/PRKCG/ATF4/ADCY8	4
GO:0045777	positive regulation of blood pressure	3/183	33/15278	0.00708329	0.201667	0.181143	ADRA1B/AGT/ADRA1A	3		hsa04721	Synaptic vesicle cycle	2/99	75/6840	0.296033	0.631335	0.556453	ATP6V0B/UNC13A	2
GO:0002446	neutrophil mediated immunity	12/183	444/15278	0.00729936	0.201667	0.181143	GLA/ANXA2/B2M/FGL2/FUCA1/CD63/ALDOC/CTSA/HSPA1B/CTSS/FCGR3B/SERPINB10	12		hsa05017	Spinocerebellar ataxia	3/99	133/6840	0.302631	0.638887	0.563109	PRKCG/ERN1/PDYN	3
GO:0001976	nervous system process involved in regulation of systemic arterial blood pressure	2/183	11/15278	0.00730973	0.201667	0.181143	AGT/ADRA1A	2		hsa05330	Allograft rejection	1/99	25/6840	0.305895	0.63932	0.563491	HLA-DQB1	1
GO:0006241	CTP biosynthetic process	2/183	11/15278	0.00730973	0.201667	0.181143	NME1/UCK2	2		hsa04540	Gap junction	2/99	80/6840	0.322825	0.641288	0.565224	PRKCG/ADCY8	2
GO:0031340	positive regulation of vesicle fusion	2/183	11/15278	0.00730973	0.201667	0.181143	ANXA2/SYT9	2		hsa04072	Phospholipase D signaling pathway	3/99	139/6840	0.326531	0.641288	0.565224	DGKG/AGT/ADCY8	3
GO:0031915	positive regulation of synaptic plasticity	2/183	11/15278	0.00730973	0.201667	0.181143	ADCY8/UNC13A	2		hsa05205	Proteoglycans in cancer	4/99	200/6840	0.328604	0.641288	0.565224	CAMK2A/PRKCG/CD63/COL1A1	4
GO:0043589	skin morphogenesis	2/183	11/15278	0.00730973	0.201667	0.181143	COL1A1/GBA	2		hsa04932	Non-alcoholic fatty liver disease	3/99	140/6840	0.330518	0.641288	0.565224	FOS/ATF4/ERN1	3
GO:0045760	positive regulation of action potential	2/183	11/15278	0.00730973	0.201667	0.181143	GBA/ADRA1A	2		hsa04012	ErbB signaling pathway	2/99	82/6840	0.333479	0.641288	0.565224	CAMK2A/PRKCG	2
GO:0046036	CTP metabolic process	2/183	11/15278	0.00730973	0.201667	0.181143	NME1/UCK2	2		hsa04620	Toll-like receptor signaling pathway	2/99	82/6840	0.333479	0.641288	0.565224	SPP1/FOS	2
GO:2000302	positive regulation of synaptic vesicle exocytosis	2/183	11/15278	0.00730973	0.201667	0.181143	SYT9/SLC4A8	2		hsa00030	Pentose phosphate pathway	1/99	28/6840	0.335711	0.641288	0.565224	ALDOC	1
GO:0007187	G protein-coupled receptor signaling pathway, coupled to cyclic nucleotide second messenger	8/183	235/15278	0.00745	0.202983	0.182326	ADRA1B/ADCYAP1R1/CHRM2/AGT/CRHR1/OPRL1/ADCY8/ADRA1A	8		hsa05320	Autoimmune thyroid disease	1/99	28/6840	0.335711	0.641288	0.565224	HLA-DQB1	1
GO:0031668	cellular response to extracellular stimulus	8/183	236/15278	0.00763467	0.202983	0.182326	SIK1/FOS/MFSD2A/SLC38A2/ATF4/COL1A1/GBA/TLE5	8		hsa04658	Th1 and Th2 cell differentiation	2/99	84/6840	0.344085	0.641288	0.565224	FOS/HLA-DQB1	2
GO:0036230	granulocyte activation	12/183	447/15278	0.00768152	0.202983	0.182326	GLA/ANXA2/B2M/FGL2/FUCA1/CD63/ALDOC/CTSA/HSPA1B/CTSS/FCGR3B/SERPINB10	12		hsa00052	Galactose metabolism	1/99	29/6840	0.345366	0.641288	0.565224	GLA	1
GO:0007202	activation of phospholipase C activity	3/183	34/15278	0.00770127	0.202983	0.182326	ADCYAP1R1/AGT/ADRA1A	3		hsa00630	Glyoxylate and dicarboxylate metabolism	1/99	29/6840	0.345366	0.641288	0.565224	AFMID	1
GO:0097484	dendrite extension	3/183	34/15278	0.00770127	0.202983	0.182326	CPNE5/UNC13A/SYT4	3		hsa05161	Hepatitis B	3/99	144/6840	0.346459	0.641288	0.565224	FOS/PRKCG/ATF4	3
GO:0007568	aging	9/183	287/15278	0.00780733	0.203958	0.183201	B2M/FOS/IGFBP5/AGT/C1QA/ASS1/RPN2/CRYAB/ADRA1A	9		hsa04211	Longevity regulating pathway	2/99	85/6840	0.349369	0.641288	0.565224	ATF4/ADCY8	2
GO:0035966	response to topologically incorrect protein	7/183	191/15278	0.00821767	0.207187	0.186102	CHAC1/ATF4/ERN1/HSPA1B/PPP1R15B/SELENOS/SDF2L1	7		hsa00051	Fructose and mannose metabolism	1/99	30/6840	0.354881	0.641288	0.565224	ALDOC	1
GO:0046466	membrane lipid catabolic process	3/183	35/15278	0.00835011	0.207187	0.186102	GLA/FUCA1/GBA	3		hsa00500	Starch and sucrose metabolism	1/99	30/6840	0.354881	0.641288	0.565224	PYGM	1
GO:1901658	glycosyl compound catabolic process	3/183	35/15278	0.00835011	0.207187	0.186102	GLA/FUCA1/GBA	3		hsa05143	African trypanosomiasis	1/99	31/6840	0.364259	0.641288	0.565224	PRKCG	1
GO:0048511	rhythmic process	9/183	291/15278	0.00850835	0.207187	0.186102	SIK1/PAM/PTPRN/DBP/PRKCG/ASS1/ATF4/OPRL1/CREM	9		hsa04650	Natural killer cell mediated cytotoxicity	2/99	88/6840	0.365135	0.641288	0.565224	PRKCG/FCGR3B	2
GO:0006983	ER overload response	2/183	12/15278	0.00870299	0.207187	0.186102	PPP1R15B/SELENOS	2		hsa05222	Small cell lung cancer	2/99	88/6840	0.365135	0.641288	0.565224	LAMB3/LAMC2	2
GO:0007494	midgut development	2/183	12/15278	0.00870299	0.207187	0.186102	RET/ASS1	2		hsa05410	Hypertrophic cardiomyopathy	2/99	88/6840	0.365135	0.641288	0.565224	AGT/RYR2	2
GO:0009209	pyrimidine ribonucleoside triphosphate biosynthetic process	2/183	12/15278	0.00870299	0.207187	0.186102	NME1/UCK2	2		hsa04666	Fc gamma R-mediated phagocytosis	2/99	89/6840	0.370359	0.645043	0.568534	PRKCG/FCGR3B	2
GO:0016188	synaptic vesicle maturation	2/183	12/15278	0.00870299	0.207187	0.186102	DLG4/UNC13A	2		hsa01522	Endocrine resistance	2/99	90/6840	0.375567	0.648707	0.571764	FOS/ADCY8	2
GO:0031581	hemidesmosome assembly	2/183	12/15278	0.00870299	0.207187	0.186102	LAMB3/LAMC2	2		hsa05215	Prostate cancer	2/99	91/6840	0.380758	0.652282	0.574915	ETV5/ATF4	2
GO:0051639	actin filament network formation	2/183	12/15278	0.00870299	0.207187	0.186102	LCP1/FHOD3	2		hsa04310	Wnt signaling pathway	3/99	155/6840	0.390076	0.662812	0.584196	CAMK2A/SFRP4/PRKCG	3
GO:0072578	neurotransmitter-gated ion channel clustering	2/183	12/15278	0.00870299	0.207187	0.186102	SLC7A11/DLG4	2		hsa04070	Phosphatidylinositol signaling system	2/99	94/6840	0.396221	0.667824	0.588613	DGKG/PRKCG	2
GO:0002790	peptide secretion	12/183	456/15278	0.0089232	0.209465	0.188148	PAM/PTPRN/SCG2/PDIA4/AGT/SYT9/CRHR1/MYRIP/ADCY8/VGF/ERP29/SYT4	12		hsa04960	Aldosterone-regulated sodium reabsorption	1/99	36/6840	0.409164	0.684123	0.602979	PRKCG	1
GO:0015807	L-amino acid transport	4/183	68/15278	0.00894056	0.209465	0.188148	SLC7A11/AGT/SLC3A2/SLC38A2	4		hsa04659	Th17 cell differentiation	2/99	98/6840	0.416564	0.687497	0.605953	FOS/HLA-DQB1	2
GO:0046879	hormone secretion	9/183	298/15278	0.0098492	0.222654	0.199995	SPP1/CCKAR/PTPRN/AGT/SYT9/CRHR1/MYRIP/ADCY8/VGF	9		hsa05216	Thyroid cancer	1/99	37/6840	0.417761	0.687497	0.605953	RET	1
GO:0009208	pyrimidine ribonucleoside triphosphate metabolic process	2/183	13/15278	0.0102049	0.222654	0.199995	NME1/UCK2	2		hsa05022	Pathways of neurodegeneration - multiple diseases	7/99	426/6840	0.421244	0.687812	0.606231	CAMK2A/RYR2/PRKCG/ATF4/ERN1/DLG4/PDYN	7
GO:0048172	regulation of short-term neuronal synaptic plasticity	2/183	13/15278	0.0102049	0.222654	0.199995	UNC13A/SYT4	2		hsa00513	Various types of N-glycan biosynthesis	1/99	39/6840	0.434585	0.704095	0.620583	RPN2	1
GO:1900452	regulation of long-term synaptic depression	2/183	13/15278	0.0102049	0.222654	0.199995	ADCY8/ARC	2		hsa00380	Tryptophan metabolism	1/99	40/6840	0.442816	0.706477	0.622682	AFMID	1
GO:0046209	nitric oxide metabolic process	4/183	71/15278	0.0103768	0.222654	0.199995	GLA/AGT/ASS1/SELENOS	4		hsa04672	Intestinal immune network for IgA production	1/99	40/6840	0.442816	0.706477	0.622682	HLA-DQB1	1
GO:1901657	glycosyl compound metabolic process	5/183	110/15278	0.0103925	0.222654	0.199995	GLA/FUCA1/NME1/GBA/UCK2	5		hsa04668	TNF signaling pathway	2/99	106/6840	0.4562	0.719097	0.633805	FOS/ATF4	2
GO:0009612	response to mechanical stimulus	7/183	200/15278	0.0104314	0.222654	0.199995	FOS/COL3A1/AGT/RYR2/NRXN2/SLC38A2/COL1A1	7		hsa04913	Ovarian steroidogenesis	1/99	42/6840	0.458923	0.719097	0.633805	ADCY8	1
GO:0089718	amino acid import across plasma membrane	3/183	38/15278	0.010485	0.222654	0.199995	SLC7A11/AGT/SLC3A2	3		hsa04931	Insulin resistance	2/99	107/6840	0.461048	0.719097	0.633805	AGT/PYGM	2
GO:1903305	regulation of regulated secretory pathway	6/183	154/15278	0.0106252	0.222654	0.199995	CHRM2/PRKCG/SYT9/SLC4A8/SYT4/ADRA1A	6		hsa04114	Oocyte meiosis	2/99	108/6840	0.465871	0.721238	0.635692	CAMK2A/ADCY8	2
GO:0014706	striated muscle tissue development	10/183	356/15278	0.0107786	0.222654	0.199995	KCNAB1/SIK1/FOS/AGT/RYR2/HEYL/PGM5/ELN/FHOD3/ADRA1A	10		hsa04380	Osteoclast differentiation	2/99	109/6840	0.47067	0.723309	0.637517	FOS/FCGR3B	2
GO:0010817	regulation of hormone levels	12/183	470/15278	0.0111606	0.222654	0.199995	SPP1/CCKAR/PCSK1/PTPRN/AGT/SYT9/CRHR1/SCPEP1/MYRIP/PCSK2/ADCY8/VGF	12		hsa00480	Glutathione metabolism	1/99	45/6840	0.482223	0.730323	0.643699	CHAC1	1
GO:0140353	lipid export from cell	3/183	39/15278	0.0112604	0.222654	0.199995	SPP1/AGT/CRHR1	3		hsa05416	Viral myocarditis	1/99	45/6840	0.482223	0.730323	0.643699	HLA-DQB1	1
GO:0035967	cellular response to topologically incorrect protein	6/183	156/15278	0.0112743	0.222654	0.199995	ATF4/ERN1/HSPA1B/PPP1R15B/SELENOS/SDF2L1	6		hsa04722	Neurotrophin signaling pathway	2/99	113/6840	0.489607	0.731152	0.64443	CAMK2A/ATF4	2
GO:0071496	cellular response to external stimulus	9/183	305/15278	0.011344	0.222654	0.199995	SIK1/FOS/AGT/MFSD2A/SLC38A2/ATF4/COL1A1/GBA/TLE5	9		hsa00330	Arginine and proline metabolism	1/99	46/6840	0.489767	0.731152	0.64443	SAT1	1
GO:0008306	associative learning	4/183	73/15278	0.0114126	0.222654	0.199995	SLC7A11/FOS/AGT/OPRL1	4		hsa05134	Legionellosis	1/99	48/6840	0.504529	0.744102	0.655844	HSPA1B	1
GO:0043627	response to estrogen	4/183	73/15278	0.0114126	0.222654	0.199995	CITED1/PTPRN/CITED2/GBA	4		hsa05162	Measles	2/99	117/6840	0.508122	0.744102	0.655844	FOS/HSPA1B	2
GO:0009914	hormone transport	9/183	307/15278	0.0118008	0.222654	0.199995	SPP1/CCKAR/PTPRN/AGT/SYT9/CRHR1/MYRIP/ADCY8/VGF	9		hsa00510	N-Glycan biosynthesis	1/99	49/6840	0.511751	0.744102	0.655844	RPN2	1
GO:0007158	neuron cell-cell adhesion	2/183	14/15278	0.0118126	0.222654	0.199995	RET/NRXN2	2		hsa04919	Thyroid hormone signaling pathway	2/99	118/6840	0.512683	0.744102	0.655844	PRKCG/THRA	2
GO:0010663	positive regulation of striated muscle cell apoptotic process	2/183	14/15278	0.0118126	0.222654	0.199995	CAMK2A/AGT	2		hsa04961	Endocrine and other factor-regulated calcium reabsorption	1/99	50/6840	0.518869	0.747887	0.65918	PRKCG	1
GO:0010666	positive regulation of cardiac muscle cell apoptotic process	2/183	14/15278	0.0118126	0.222654	0.199995	CAMK2A/AGT	2		hsa00230	Purine metabolism	2/99	122/6840	0.530652	0.754465	0.664978	NME1/ADCY8	2
GO:0032328	alanine transport	2/183	14/15278	0.0118126	0.222654	0.199995	SLC3A2/SLC38A2	2		hsa05418	Fluid shear stress and atherosclerosis	2/99	122/6840	0.530652	0.754465	0.664978	FOS/ASS1	2
GO:0038092	nodal signaling pathway	2/183	14/15278	0.0118126	0.222654	0.199995	CITED2/ACVR1B	2		hsa04217	Necroptosis	2/99	124/6840	0.539469	0.756905	0.667128	CAMK2A/PYGM	2
GO:0043558	regulation of translational initiation in response to stress	2/183	14/15278	0.0118126	0.222654	0.199995	ATF4/PPP1R15B	2		hsa04923	Regulation of lipolysis in adipocytes	1/99	53/6840	0.539612	0.756905	0.667128	ADCY8	1
GO:0099171	presynaptic modulation of chemical synaptic transmission	2/183	14/15278	0.0118126	0.222654	0.199995	PRKCG/SYT9	2		hsa04370	VEGF signaling pathway	1/99	55/6840	0.552946	0.770438	0.679056	PRKCG	1
GO:0150011	regulation of neuron projection arborization	2/183	14/15278	0.0118126	0.222654	0.199995	MFSD2A/DLG4	2		hsa00010	Glycolysis / Gluconeogenesis	1/99	56/6840	0.559469	0.772803	0.681141	ALDOC	1
GO:1901386	negative regulation of voltage-gated calcium channel activity	2/183	14/15278	0.0118126	0.222654	0.199995	CRHR1/OPRL1	2		hsa04330	Notch signaling pathway	1/99	57/6840	0.565897	0.772803	0.681141	HEYL	1
GO:0021675	nerve development	4/183	74/15278	0.0119545	0.222654	0.199995	PLXNA4/RET/PRKCG/UNC13A	4		hsa05321	Inflammatory bowel disease	1/99	57/6840	0.565897	0.772803	0.681141	HLA-DQB1	1
GO:2001057	reactive nitrogen species metabolic process	4/183	74/15278	0.0119545	0.222654	0.199995	GLA/AGT/ASS1/SELENOS	4		hsa05135	Yersinia infection	2/99	131/6840	0.569434	0.772803	0.681141	ARHGEF28/FOS	2
GO:0071375	cellular response to peptide hormone stimulus	9/183	308/15278	0.0120343	0.222654	0.199995	CAMK2A/AGT/ATP6V0B/ASS1/RANGAP1/CRHR1/ADCY8/SELENOS/ECHDC3	9		hsa04550	Signaling pathways regulating pluripotency of stem cells	2/99	134/6840	0.581845	0.784552	0.691496	DUSP9/ACVR1B	2
GO:0022604	regulation of cell morphogenesis	12/183	475/15278	0.0120571	0.222654	0.199995	SPP1/SEMA5A/PLXNA4/RET/MFSD2A/LRP8/P4HB/DLG4/CPNE5/ARC/UNC13A/SYT4	12		hsa04723	Retrograde endocannabinoid signaling	2/99	135/6840	0.585924	0.784988	0.69188	PRKCG/ADCY8	2
GO:0009268	response to pH	3/183	40/15278	0.012068	0.222654	0.199995	PAM/CTSS/GBA	3		hsa05120	Epithelial cell signaling in Helicobacter pylori infection	1/99	62/6840	0.596674	0.787395	0.694002	ATP6V0B	1
GO:0033574	response to testosterone	3/183	40/15278	0.012068	0.222654	0.199995	SPP1/NME1/GBA	3		hsa05012	Parkinson disease	3/99	212/6840	0.597329	0.787395	0.694002	CAMK2A/ATF4/ERN1	3
GO:0045823	positive regulation of heart contraction	3/183	40/15278	0.012068	0.222654	0.199995	ADRA1B/RYR2/ADRA1A	3		hsa04613	Neutrophil extracellular trap formation	2/99	140/6840	0.605883	0.787395	0.694002	PRKCG/FCGR3B	2
GO:1904707	positive regulation of vascular associated smooth muscle cell proliferation	3/183	40/15278	0.012068	0.222654	0.199995	IGFBP5/AGT/ERN1	3		hsa05230	Central carbon metabolism in cancer	1/99	64/6840	0.608371	0.787395	0.694002	RET	1
GO:0009306	protein secretion	11/183	419/15278	0.0122756	0.225077	0.202172	PAM/PTPRN/SCG2/PDIA4/AGT/SYT9/MYRIP/ADCY8/VGF/ERP29/SYT4	11		hsa05034	Alcoholism	2/99	142/6840	0.613664	0.787395	0.694002	ATF4/PDYN	2
GO:0043299	leukocyte degranulation	12/183	477/15278	0.0124309	0.22598	0.202982	GLA/ANXA2/B2M/FGL2/FUCA1/CD63/ALDOC/CTSA/HSPA1B/CTSS/FCGR3B/SERPINB10	12		hsa05224	Breast cancer	2/99	142/6840	0.613664	0.787395	0.694002	FOS/HEYL	2
GO:0035592	establishment of protein localization to extracellular region	11/183	420/15278	0.0124779	0.22598	0.202982	PAM/PTPRN/SCG2/PDIA4/AGT/SYT9/MYRIP/ADCY8/VGF/ERP29/SYT4	11		hsa04917	Prolactin signaling pathway	1/99	65/6840	0.614093	0.787395	0.694002	FOS	1
GO:0007623	circadian rhythm	7/183	209/15278	0.013051	0.233798	0.210004	SIK1/DBP/PRKCG/ASS1/ATF4/OPRL1/CREM	7		hsa04976	Bile secretion	1/99	67/6840	0.62529	0.792601	0.698591	ADCY8	1
GO:0043270	positive regulation of ion transport	8/183	260/15278	0.0131854	0.233798	0.210004	CAMK2A/ADCYAP1R1/AGT/RYR2/ATF4/ARC/CTSS/SYT4	8		hsa04014	Ras signaling pathway	3/99	221/6840	0.625738	0.792601	0.698591	PRKCG/RASGRP3/EFNA3	3
GO:0051047	positive regulation of secretion	9/183	313/15278	0.0132539	0.233798	0.210004	SPP1/AGT/SYT9/SLC4A8/MYRIP/OPRL1/ADCY8/UNC13A/SYT4	9		hsa04150	mTOR signaling pathway	2/99	151/6840	0.647242	0.814901	0.718245	PRKCG/SLC3A2	2
GO:0046479	glycosphingolipid catabolic process	2/183	15/15278	0.0135235	0.233798	0.210004	GLA/GBA	2		hsa05100	Bacterial invasion of epithelial cells	1/99	72/6840	0.651894	0.815843	0.719076	SEPTIN3	1
GO:0051969	regulation of transmission of nerve impulse	2/183	15/15278	0.0135235	0.233798	0.210004	AGT/GBA	2		hsa01521	EGFR tyrosine kinase inhibitor resistance	1/99	76/6840	0.671823	0.830835	0.73229	PRKCG	1
GO:2000846	regulation of corticosteroid hormone secretion	2/183	15/15278	0.0135235	0.233798	0.210004	AGT/CRHR1	2		hsa05412	Arrhythmogenic right ventricular cardiomyopathy	1/99	76/6840	0.671823	0.830835	0.73229	RYR2	1
GO:0006959	humoral immune response	7/183	211/15278	0.0136921	0.233798	0.210004	CFI/VSIG4/KLK7/C1QA/C1QC/C1QB/HLA-DQB1	7		hsa04260	Cardiac muscle contraction	1/99	80/6840	0.690623	0.841172	0.741401	RYR2	1
GO:0071692	protein localization to extracellular region	11/183	426/15278	0.0137457	0.233798	0.210004	PAM/PTPRN/SCG2/PDIA4/AGT/SYT9/MYRIP/ADCY8/VGF/ERP29/SYT4	11		hsa04657	IL-17 signaling pathway	1/99	81/6840	0.695154	0.841172	0.741401	FOS	1
GO:0043090	amino acid import	3/183	42/15278	0.0137808	0.233798	0.210004	SLC7A11/AGT/SLC3A2	3		hsa05202	Transcriptional misregulation in cancer	2/99	167/6840	0.701242	0.841172	0.741401	ETV5/LMO2	2
GO:0045776	negative regulation of blood pressure	3/183	42/15278	0.0137808	0.233798	0.210004	SCPEP1/OPRL1/ADRA1A	3		hsa05169	Epstein-Barr virus infection	2/99	169/6840	0.707493	0.841172	0.741401	B2M/HLA-DQB1	2
GO:0071827	plasma lipoprotein particle organization	3/183	42/15278	0.0137808	0.233798	0.210004	AGT/MFSD2A/P4HB	3		hsa04914	Progesterone-mediated oocyte maturation	1/99	84/6840	0.708356	0.841172	0.741401	ADCY8	1
GO:0007162	negative regulation of cell adhesion	8/183	264/15278	0.0143403	0.239677	0.215286	VSIG4/SEMA5A/FGL2/PLXNA4/CDH13/ASS1/LGALS1/COL1A1	8		hsa05210	Colorectal cancer	1/99	84/6840	0.708356	0.841172	0.741401	FOS	1
GO:0031346	positive regulation of cell projection organization	10/183	373/15278	0.0145507	0.239677	0.215286	SEMA5A/PLXNA4/RET/AGT/LRP8/NME1/DLG4/CPNE5/UNC13A/SYT4	10		hsa05235	PD-L1 expression and PD-1 checkpoint pathway in cancer	1/99	84/6840	0.708356	0.841172	0.741401	FOS	1
GO:0048638	regulation of developmental growth	9/183	318/15278	0.0145633	0.239677	0.215286	SPP1/DUSP9/SEMA5A/PPIB/PLXNA4/MFSD2A/CPNE5/UNC13A/SYT4	9		hsa04640	Hematopoietic cell lineage	1/99	85/6840	0.712629	0.841466	0.74166	HLA-DQB1	1
GO:0002275	myeloid cell activation involved in immune response	12/183	488/15278	0.0146484	0.239677	0.215286	GLA/ANXA2/B2M/FGL2/FUCA1/CD63/ALDOC/CTSA/HSPA1B/CTSS/FCGR3B/SERPINB10	12		hsa04350	TGF-beta signaling pathway	1/99	87/6840	0.720992	0.846558	0.746147	ACVR1B	1
GO:0035722	interleukin-12-mediated signaling pathway	3/183	43/15278	0.0146863	0.239677	0.215286	ANXA2/LCP1/P4HB	3		hsa00564	Glycerophospholipid metabolism	1/99	94/6840	0.748406	0.873838	0.770192	DGKG	1
GO:2001258	negative regulation of cation channel activity	3/183	43/15278	0.0146863	0.239677	0.215286	KCNAB1/CRHR1/OPRL1	3		hsa04660	T cell receptor signaling pathway	1/99	101/6840	0.773152	0.896604	0.790258	FOS	1
GO:0007188	adenylate cyclase-modulating G protein-coupled receptor signaling pathway	7/183	214/15278	0.0146957	0.239677	0.215286	ADRA1B/ADCYAP1R1/CHRM2/CRHR1/OPRL1/ADCY8/ADRA1A	7		hsa04726	Serotonergic synapse	1/99	102/6840	0.776485	0.896604	0.790258	PRKCG	1
GO:2001257	regulation of cation channel activity	6/183	166/15278	0.0149446	0.242397	0.217729	KCNAB1/CRHR1/DLG4/OPRL1/ARC/CTSS	6		hsa04670	Leukocyte transendothelial migration	1/99	106/6840	0.789337	0.906436	0.798924	PRKCG	1
GO:0006750	glutathione biosynthetic process	2/183	16/15278	0.0153349	0.24338	0.218611	SLC7A11/CHAC1	2		hsa05206	MicroRNAs in cancer	2/99	206/6840	0.804799	0.911981	0.803811	PRKCG/EFNA3	2
GO:0009148	pyrimidine nucleoside triphosphate biosynthetic process	2/183	16/15278	0.0153349	0.24338	0.218611	NME1/UCK2	2		hsa00190	Oxidative phosphorylation	1/99	112/6840	0.807256	0.911981	0.803811	ATP6V0B	1
GO:0035930	corticosteroid hormone secretion	2/183	16/15278	0.0153349	0.24338	0.218611	AGT/CRHR1	2		hsa01200	Carbon metabolism	1/99	112/6840	0.807256	0.911981	0.803811	ALDOC	1
GO:1900451	positive regulation of glutamate receptor signaling pathway	2/183	16/15278	0.0153349	0.24338	0.218611	ARC/UNC13A	2		hsa04071	Sphingolipid signaling pathway	1/99	116/6840	0.818355	0.914632	0.806148	PRKCG	1
GO:0009409	response to cold	3/183	44/15278	0.0156248	0.244044	0.219208	FOS/THRA/VGF	3		hsa04152	AMPK signaling pathway	1/99	116/6840	0.818355	0.914632	0.806148	ADRA1A	1
GO:0019748	secondary metabolic process	3/183	44/15278	0.0156248	0.244044	0.219208	SLC7A11/CITED1/PAM	3		hsa03040	Spliceosome	1/99	124/6840	0.83869	0.931948	0.82141	HSPA1B	1
GO:0071349	cellular response to interleukin-12	3/183	44/15278	0.0156248	0.244044	0.219208	ANXA2/LCP1/P4HB	3		hsa05132	Salmonella infection	2/99	225/6840	0.842766	0.931948	0.82141	ANXA2/FOS	2
GO:0002444	myeloid leukocyte mediated immunity	12/183	494/15278	0.0159787	0.246613	0.221516	GLA/ANXA2/B2M/FGL2/FUCA1/CD63/ALDOC/CTSA/HSPA1B/CTSS/FCGR3B/SERPINB10	12		hsa04910	Insulin signaling pathway	1/99	131/6840	0.854623	0.940086	0.828582	PYGM	1
GO:0071333	cellular response to glucose stimulus	5/183	123/15278	0.0162207	0.246613	0.221516	PTPRN/LGALS1/ERN1/NME1/ADCY8	5		hsa04140	Autophagy - animal	1/99	135/6840	0.863018	0.94435	0.83234	ERN1	1
GO:0070671	response to interleukin-12	3/183	45/15278	0.0165963	0.246613	0.221516	ANXA2/LCP1/P4HB	3		hsa04060	Cytokine-cytokine receptor interaction	2/99	241/6840	0.86946	0.945199	0.833089	TNFRSF9/ACVR1B	2
GO:0071825	protein-lipid complex subunit organization	3/183	45/15278	0.0165963	0.246613	0.221516	AGT/MFSD2A/P4HB	3		hsa05164	Influenza A	1/99	140/6840	0.872839	0.945199	0.833089	HLA-DQB1	1
GO:0006986	response to unfolded protein	6/183	170/15278	0.0166214	0.246613	0.221516	CHAC1/ATF4/ERN1/HSPA1B/PPP1R15B/SELENOS	6		hsa04390	Hippo signaling pathway	1/99	149/6840	0.888793	0.953473	0.840382	DLG4	1
GO:0050807	regulation of synapse organization	7/183	220/15278	0.0168586	0.246613	0.221516	ETV5/SLC7A11/LRRC4B/LRP8/MDGA1/ARC/LRTM2	7		hsa05225	Hepatocellular carcinoma	1/99	151/6840	0.89206	0.953473	0.840382	PRKCG	1
GO:0097006	regulation of plasma lipoprotein particle levels	4/183	82/15278	0.016888	0.246613	0.221516	ANXA2/AGT/MFSD2A/P4HB	4		hsa03013	RNA transport	1/99	155/6840	0.898311	0.953473	0.840382	RANGAP1	1
GO:0042593	glucose homeostasis	7/183	221/15278	0.0172398	0.246613	0.221516	IGFBP5/PTPRN/LGALS1/ERN1/NME1/ADCY8/VGF	7		hsa05167	Kaposi sarcoma-associated herpesvirus infection	1/99	158/6840	0.902763	0.953473	0.840382	FOS	1
GO:0035994	response to muscle stretch	2/183	17/15278	0.0172441	0.246613	0.221516	FOS/RYR2	2		hsa05016	Huntington disease	2/99	268/6840	0.905324	0.953473	0.840382	ERN1/DLG4	2
GO:0045956	positive regulation of calcium ion-dependent exocytosis	2/183	17/15278	0.0172441	0.246613	0.221516	SYT9/SYT4	2		hsa04740	Olfactory transduction	2/99	274/6840	0.911947	0.953473	0.840382	CAMK2A/OR2D2	2
GO:0071625	vocalization behavior	2/183	17/15278	0.0172441	0.246613	0.221516	NRXN2/DLG4	2		hsa04062	Chemokine signaling pathway	1/99	165/6840	0.912414	0.953473	0.840382	ADCY8	1
GO:0090036	regulation of protein kinase C signaling	2/183	17/15278	0.0172441	0.246613	0.221516	DGKG/ADRA1A	2		hsa05203	Viral carcinogenesis	1/99	170/6840	0.918721	0.954248	0.841065	ATF4	1
GO:0097067	cellular response to thyroid hormone stimulus	2/183	17/15278	0.0172441	0.246613	0.221516	LMO2/CTSS	2		hsa05130	Pathogenic Escherichia coli infection	1/99	173/6840	0.922288	0.954248	0.841065	FOS	1
GO:0097107	postsynaptic density assembly	2/183	17/15278	0.0172441	0.246613	0.221516	LRRC4B/NRXN2	2		hsa05168	Herpes simplex virus 1 infection	2/99	297/6840	0.933552	0.961144	0.847143	B2M/HLA-DQB1	2
GO:1990000	amyloid fibril formation	2/183	17/15278	0.0172441	0.246613	0.221516	B2M/CRYAB	2		hsa05014	Amyotrophic lateral sclerosis	2/99	320/6840	0.950115	0.962199	0.848072	ATF4/ERN1	2
GO:0071331	cellular response to hexose stimulus	5/183	125/15278	0.0172767	0.246613	0.221516	PTPRN/LGALS1/ERN1/NME1/ADCY8	5		hsa04714	Thermogenesis	1/99	205/6840	0.951906	0.962199	0.848072	ADCY8	1
GO:1905897	regulation of response to endoplasmic reticulum stress	4/183	83/15278	0.0175816	0.246613	0.221516	ERN1/PPP1R15B/SELENOS/ERP29	4		hsa04810	Regulation of actin cytoskeleton	1/99	208/6840	0.954028	0.962199	0.848072	CHRM2	1
GO:0010863	positive regulation of phospholipase C activity	3/183	46/15278	0.017601	0.246613	0.221516	ADCYAP1R1/AGT/ADRA1A	3		hsa05010	Alzheimer disease	2/99	329/6840	0.955468	0.962199	0.848072	ATF4/ERN1	2
GO:0045646	regulation of erythrocyte differentiation	3/183	46/15278	0.017601	0.246613	0.221516	B2M/ACVR1B/HSPA1B	3		hsa05131	Shigellosis	1/99	220/6840	0.961625	0.962199	0.848072	SEPTIN3	1
GO:0050919	negative chemotaxis	3/183	46/15278	0.017601	0.246613	0.221516	SEMA5A/PLXNA4/LRTM2	3		hsa04144	Endocytosis	1/99	221/6840	0.962199	0.962199	0.848072	HSPA1B	1
GO:0031667	response to nutrient levels	11/183	442/15278	0.0176048	0.246613	0.221516	SIK1/SPP1/PRKCG/NUCB2/MFSD2A/ASS1/SLC38A2/ATF4/COL1A1/VGF/GBA	11
GO:0033500	carbohydrate homeostasis	7/183	222/15278	0.0176271	0.246613	0.221516	IGFBP5/PTPRN/LGALS1/ERN1/NME1/ADCY8/VGF	7
GO:0071326	cellular response to monosaccharide stimulus	5/183	126/15278	0.0178214	0.248155	0.222901	PTPRN/LGALS1/ERN1/NME1/ADCY8	5
GO:0003333	amino acid transmembrane transport	4/183	84/15278	0.0182927	0.253522	0.227721	SLC7A11/AGT/SLC3A2/SLC38A2	4
GO:0009066	aspartate family amino acid metabolic process	3/183	47/15278	0.018639	0.257114	0.230948	ASRGL1/ASS1/ATF4	3
GO:0006677	glycosylceramide metabolic process	2/183	18/15278	0.0192486	0.25946	0.233056	GLA/GBA	2
GO:0019184	nonribosomal peptide biosynthetic process	2/183	18/15278	0.0192486	0.25946	0.233056	SLC7A11/CHAC1	2
GO:0032095	regulation of response to food	2/183	18/15278	0.0192486	0.25946	0.233056	PRKCG/NUCB2	2
GO:1904754	positive regulation of vascular associated smooth muscle cell migration	2/183	18/15278	0.0192486	0.25946	0.233056	IGFBP5/AGT	2
GO:2000831	regulation of steroid hormone secretion	2/183	18/15278	0.0192486	0.25946	0.233056	AGT/CRHR1	2
GO:0003044	regulation of systemic arterial blood pressure mediated by a chemical signal	3/183	48/15278	0.0197103	0.262909	0.236153	ADRA1B/AGT/ADRA1A	3
GO:1900274	regulation of phospholipase C activity	3/183	48/15278	0.0197103	0.262909	0.236153	ADCYAP1R1/AGT/ADRA1A	3
GO:0030308	negative regulation of cell growth	6/183	177/15278	0.0198607	0.262909	0.236153	SPP1/SEMA5A/AGT/ACVR1B/HSPA1B/CRYAB	6
GO:0031345	negative regulation of cell projection organization	6/183	177/15278	0.0198607	0.262909	0.236153	SPP1/SEMA5A/B2M/RAP1GAP/LGALS1/RAP1GAP2	6
GO:0045926	negative regulation of growth	7/183	228/15278	0.0200808	0.263762	0.236919	SPP1/SEMA5A/IGFBP5/AGT/ACVR1B/HSPA1B/CRYAB	7
GO:0034765	regulation of ion transmembrane transport	11/183	451/15278	0.0201038	0.263762	0.236919	KCNAB1/DPP10/AGT/RYR2/CD63/CRHR1/DLG4/KCNQ2/OPRL1/ARC/CTSS	11
GO:0006094	gluconeogenesis	4/183	88/15278	0.021315	0.269883	0.242417	SIK1/ATF4/ALDOC/SELENOS	4
GO:0061097	regulation of protein tyrosine kinase activity	4/183	88/15278	0.021315	0.269883	0.242417	AGT/LRP8/DLG4/ADRA1A	4
GO:0001502	cartilage condensation	2/183	19/15278	0.0213458	0.269883	0.242417	THRA/ACAN	2
GO:0009147	pyrimidine nucleoside triphosphate metabolic process	2/183	19/15278	0.0213458	0.269883	0.242417	NME1/UCK2	2
GO:0009220	pyrimidine ribonucleotide biosynthetic process	2/183	19/15278	0.0213458	0.269883	0.242417	NME1/UCK2	2
GO:0032793	positive regulation of CREB transcription factor activity	2/183	19/15278	0.0213458	0.269883	0.242417	LRP8/ADCY8	2
GO:0043555	regulation of translation in response to stress	2/183	19/15278	0.0213458	0.269883	0.242417	ATF4/PPP1R15B	2
GO:0071243	cellular response to arsenic-containing substance	2/183	19/15278	0.0213458	0.269883	0.242417	SLC38A2/ATF4	2
GO:0050803	regulation of synapse structure or activity	7/183	231/15278	0.0213931	0.269883	0.242417	ETV5/SLC7A11/LRRC4B/LRP8/MDGA1/ARC/LRTM2	7
GO:0006984	ER-nucleus signaling pathway	3/183	50/15278	0.021953	0.271709	0.244057	ATF4/PPP1R15B/SELENOS	3
GO:0014897	striated muscle hypertrophy	4/183	89/15278	0.0221154	0.271709	0.244057	IGFBP5/AGT/RYR2/ADRA1A	4
GO:0006816	calcium ion transport	10/183	400/15278	0.0224624	0.271709	0.244057	CAMK2A/ANXA2/ADCYAP1R1/AGT/RYR2/SLC3A2/CRHR1/SLC24A3/OPRL1/ADRA1A	10
GO:0007189	adenylate cyclase-activating G protein-coupled receptor signaling pathway	5/183	134/15278	0.0225912	0.271709	0.244057	ADRA1B/CRHR1/OPRL1/ADCY8/ADRA1A	5
GO:0071322	cellular response to carbohydrate stimulus	5/183	134/15278	0.0225912	0.271709	0.244057	PTPRN/LGALS1/ERN1/NME1/ADCY8	5
GO:0034599	cellular response to oxidative stress	8/183	288/15278	0.0228659	0.271709	0.244057	ETV5/SLC7A11/FOS/ATF4/P4HB/RNF112/HSPA1B/SELENOS	8
GO:0036473	cell death in response to oxidative stress	4/183	90/15278	0.0229341	0.271709	0.244057	SLC7A11/ATF4/P4HB/RNF112	4
GO:0009749	response to glucose	6/183	183/15278	0.0229595	0.271709	0.244057	PTPRN/LGALS1/ERN1/NME1/ADCY8/SELENOS	6
GO:0090183	regulation of kidney development	3/183	51/15278	0.0231245	0.271709	0.244057	CITED1/RET/AGT	3
GO:1903307	positive regulation of regulated secretory pathway	3/183	51/15278	0.0231245	0.271709	0.244057	SYT9/SLC4A8/SYT4	3
GO:0043687	post-translational protein modification	9/183	345/15278	0.0233386	0.271709	0.244057	SPP1/SCG3/IGFBP5/SCG2/LGALS1/P4HB/VGF/PRKCSH/FBXL16	9
GO:0006925	inflammatory cell apoptotic process	2/183	20/15278	0.0235333	0.271709	0.244057	SLC7A11/SELENOS	2
GO:0010866	regulation of triglyceride biosynthetic process	2/183	20/15278	0.0235333	0.271709	0.244057	SIK1/MFSD2A	2
GO:0042026	protein refolding	2/183	20/15278	0.0235333	0.271709	0.244057	B2M/HSPA1B	2
GO:0042402	cellular biogenic amine catabolic process	2/183	20/15278	0.0235333	0.271709	0.244057	SAT1/AFMID	2
GO:0042438	melanin biosynthetic process	2/183	20/15278	0.0235333	0.271709	0.244057	SLC7A11/CITED1	2
GO:0046514	ceramide catabolic process	2/183	20/15278	0.0235333	0.271709	0.244057	GLA/GBA	2
GO:0051957	positive regulation of amino acid transport	2/183	20/15278	0.0235333	0.271709	0.244057	AGT/SYT4	2
GO:0098698	postsynaptic specialization assembly	2/183	20/15278	0.0235333	0.271709	0.244057	LRRC4B/NRXN2	2
GO:0021537	telencephalon development	7/183	236/15278	0.023711	0.271709	0.244057	SLC7A11/COL3A1/PLXNA4/MFSD2A/LRP8/SLC38A2/NME1	7
GO:0014896	muscle hypertrophy	4/183	91/15278	0.0237709	0.271709	0.244057	IGFBP5/AGT/RYR2/ADRA1A	4
GO:0019319	hexose biosynthetic process	4/183	91/15278	0.0237709	0.271709	0.244057	SIK1/ATF4/ALDOC/SELENOS	4
GO:0048661	positive regulation of smooth muscle cell proliferation	4/183	91/15278	0.0237709	0.271709	0.244057	IGFBP5/AGT/CDH13/ERN1	4
GO:0050777	negative regulation of immune response	5/183	136/15278	0.023901	0.271709	0.244057	VSIG4/COL3A1/FGL2/SAMHD1/SELENOS	5
GO:0019933	cAMP-mediated signaling	6/183	185/15278	0.0240608	0.271709	0.244057	ADRA1B/ADCYAP1R1/CRHR1/OPRL1/ADCY8/ADRA1A	6
GO:1903532	positive regulation of secretion by cell	8/183	291/15278	0.0241388	0.271709	0.244057	SPP1/AGT/SYT9/SLC4A8/MYRIP/ADCY8/UNC13A/SYT4	8
GO:0050433	regulation of catecholamine secretion	3/183	52/15278	0.0243294	0.271709	0.244057	AGT/SYT9/SYT4	3
GO:0098900	regulation of action potential	3/183	52/15278	0.0243294	0.271709	0.244057	RYR2/GBA/ADRA1A	3
GO:1903793	positive regulation of anion transport	3/183	52/15278	0.0243294	0.271709	0.244057	AGT/ATF4/SYT4	3
GO:0034620	cellular response to unfolded protein	5/183	137/15278	0.0245738	0.271709	0.244057	ATF4/ERN1/HSPA1B/PPP1R15B/SELENOS	5
GO:0007204	positive regulation of cytosolic calcium ion concentration	8/183	292/15278	0.0245739	0.271709	0.244057	ADRA1B/ADCYAP1R1/AGT/RYR2/DLG4/OPRL1/ADCY8/ADRA1A	8
GO:0051090	regulation of DNA-binding transcription factor activity	10/183	407/15278	0.0249449	0.271709	0.244057	SIK1/CAMK2A/FOS/SFRP4/AGT/HEYL/LRP8/HSPA1B/ADCY8/NWD1	10
GO:0016358	dendrite development	7/183	239/15278	0.025182	0.271709	0.244057	CAMK2A/KLHL1/MFSD2A/LRP8/DLG4/ARC/LAMC2	7
GO:0009746	response to hexose	6/183	187/15278	0.025197	0.271709	0.244057	PTPRN/LGALS1/ERN1/NME1/ADCY8/SELENOS	6
GO:0002027	regulation of heart rate	4/183	93/15278	0.0254998	0.271709	0.244057	ADRA1B/AGT/RYR2/ADRA1A	4
GO:0018208	peptidyl-proline modification	3/183	53/15278	0.0255676	0.271709	0.244057	PPIB/FKBP11/P4HB	3
GO:0019318	hexose metabolic process	7/183	240/15278	0.0256859	0.271709	0.244057	SIK1/FUCA1/PGM5/ATF4/ALDOC/SELENOS/CREM	7
GO:1901654	response to ketone	6/183	188/15278	0.0257783	0.271709	0.244057	SPP1/FOS/ASS1/NME1/ADCY8/GBA	6
GO:0006582	melanin metabolic process	2/183	21/15278	0.0258086	0.271709	0.244057	SLC7A11/CITED1	2
GO:0009218	pyrimidine ribonucleotide metabolic process	2/183	21/15278	0.0258086	0.271709	0.244057	NME1/UCK2	2
GO:0035929	steroid hormone secretion	2/183	21/15278	0.0258086	0.271709	0.244057	AGT/CRHR1	2
GO:0036499	PERK-mediated unfolded protein response	2/183	21/15278	0.0258086	0.271709	0.244057	ATF4/PPP1R15B	2
GO:0044342	type B pancreatic cell proliferation	2/183	21/15278	0.0258086	0.271709	0.244057	IGFBP5/PTPRN	2
GO:0046823	negative regulation of nucleocytoplasmic transport	2/183	21/15278	0.0258086	0.271709	0.244057	RANGAP1/CABP1	2
GO:0140467	integrated stress response signaling	2/183	21/15278	0.0258086	0.271709	0.244057	ATF4/PPP1R15B	2
GO:1903204	negative regulation of oxidative stress-induced neuron death	2/183	21/15278	0.0258086	0.271709	0.244057	SLC7A11/ATF4	2
GO:0001678	cellular glucose homeostasis	5/183	139/15278	0.0259559	0.271709	0.244057	PTPRN/LGALS1/ERN1/NME1/ADCY8	5
GO:0043271	negative regulation of ion transport	5/183	139/15278	0.0259559	0.271709	0.244057	KCNAB1/SFRP4/ATF4/CRHR1/OPRL1	5
GO:0032412	regulation of ion transmembrane transporter activity	7/183	241/15278	0.0261967	0.273261	0.245451	KCNAB1/RYR2/CRHR1/DLG4/OPRL1/ARC/CTSS	7
GO:0050432	catecholamine secretion	3/183	54/15278	0.0268392	0.278977	0.250586	AGT/SYT9/SYT4	3
GO:0007596	blood coagulation	8/183	298/15278	0.027301	0.280826	0.252247	DGKG/SLC7A11/ANXA5/ANXA2/COL3A1/PRKCG/COL1A1/VKORC1	8
GO:0007631	feeding behavior	4/183	95/15278	0.0273025	0.280826	0.252247	FOS/AGT/NPB/OPRL1	4
GO:0045807	positive regulation of endocytosis	4/183	95/15278	0.0273025	0.280826	0.252247	ANXA2/B2M/SFRP4/CD63	4
GO:0034284	response to monosaccharide	6/183	191/15278	0.0275758	0.28233	0.253597	PTPRN/LGALS1/ERN1/NME1/ADCY8/SELENOS	6
GO:0032102	negative regulation of response to external stimulus	9/183	356/15278	0.0278213	0.28233	0.253597	SPP1/VSIG4/SEMA5A/ANXA2/FGL2/NUCB2/SAMHD1/GBA/SELENOS	9
GO:0009310	amine catabolic process	2/183	22/15278	0.0281693	0.28233	0.253597	SAT1/AFMID	2
GO:0044550	secondary metabolite biosynthetic process	2/183	22/15278	0.0281693	0.28233	0.253597	SLC7A11/CITED1	2
GO:0098743	cell aggregation	2/183	22/15278	0.0281693	0.28233	0.253597	THRA/ACAN	2
GO:2000209	regulation of anoikis	2/183	22/15278	0.0281693	0.28233	0.253597	SIK1/TLE5	2
GO:0043266	regulation of potassium ion transport	4/183	96/15278	0.0282318	0.28233	0.253597	KCNAB1/DPP10/CD63/ATF4	4
GO:0050817	coagulation	8/183	300/15278	0.0282551	0.28233	0.253597	DGKG/SLC7A11/ANXA5/ANXA2/COL3A1/PRKCG/COL1A1/VKORC1	8
GO:0002449	lymphocyte mediated immunity	7/183	245/15278	0.0283095	0.28233	0.253597	CFI/B2M/FGL2/C1QA/C1QC/C1QB/HLA-DQB1	7
GO:0044070	regulation of anion transport	4/183	97/15278	0.0291797	0.286288	0.257153	SFRP4/AGT/ATF4/SYT4	4
GO:0046364	monosaccharide biosynthetic process	4/183	97/15278	0.0291797	0.286288	0.257153	SIK1/ATF4/ALDOC/SELENOS	4
GO:0046545	development of primary female sexual characteristics	4/183	97/15278	0.0291797	0.286288	0.257153	PTPRN/ADCYAP1R1/ACVR1B/VGF	4
GO:0019932	second-messenger-mediated signaling	10/183	418/15278	0.0292372	0.286288	0.257153	ADRA1B/ADCYAP1R1/AGT/RYR2/CDH13/CRHR1/SAMD14/OPRL1/ADCY8/ADRA1A	10
GO:0032387	negative regulation of intracellular transport	3/183	56/15278	0.0294823	0.286288	0.257153	RANGAP1/CABP1/CRYAB	3
GO:0045428	regulation of nitric oxide biosynthetic process	3/183	56/15278	0.0294823	0.286288	0.257153	GLA/AGT/ASS1	3
GO:0050918	positive chemotaxis	3/183	56/15278	0.0294823	0.286288	0.257153	SEMA5A/SCG2/CDH13	3
GO:0061077	chaperone-mediated protein folding	3/183	56/15278	0.0294823	0.286288	0.257153	PPIB/PDIA4/HSPA1B	3
GO:0007599	hemostasis	8/183	303/15278	0.0297291	0.287739	0.258456	DGKG/SLC7A11/ANXA5/ANXA2/COL3A1/PRKCG/COL1A1/VKORC1	8
GO:0006874	cellular calcium ion homeostasis	10/183	420/15278	0.0300708	0.28942	0.259966	ADRA1B/ADCYAP1R1/AGT/RYR2/ATF4/DLG4/SLC24A3/OPRL1/ADCY8/ADRA1A	10
GO:0006643	membrane lipid metabolic process	6/183	195/15278	0.0300989	0.28942	0.259966	GLA/FUCA1/ST6GALNAC5/CTSA/GBA/CREM	6
GO:0030168	platelet activation	5/183	145/15278	0.0303973	0.289646	0.26017	DGKG/SLC7A11/COL3A1/PRKCG/COL1A1	5
GO:0002092	positive regulation of receptor internalization	2/183	23/15278	0.030613	0.289646	0.26017	SFRP4/CD63	2
GO:0014850	response to muscle activity	2/183	23/15278	0.030613	0.289646	0.26017	AGT/RYR2	2
GO:0072215	regulation of metanephros development	2/183	23/15278	0.030613	0.289646	0.26017	CITED1/RET	2
GO:0072337	modified amino acid transport	2/183	23/15278	0.030613	0.289646	0.26017	SLC7A11/SLC38A2	2
GO:0060541	respiratory system development	6/183	196/15278	0.0307526	0.290037	0.26052	KCNAB1/SLC7A11/IGFBP5/ASS1/THRA/ADAMTS2	6
GO:1902475	L-alpha-amino acid transmembrane transport	3/183	57/15278	0.0308535	0.290062	0.260543	SLC7A11/AGT/SLC3A2	3
GO:0060996	dendritic spine development	4/183	99/15278	0.0311317	0.290368	0.260817	CAMK2A/LRP8/DLG4/ARC	4
GO:1904019	epithelial cell apoptotic process	4/183	99/15278	0.0311317	0.290368	0.260817	SEMA5A/SCG2/SFRP4/RYR2	4
GO:0048660	regulation of smooth muscle cell proliferation	5/183	146/15278	0.0311811	0.290368	0.260817	IGFBP5/AGT/CDH13/ERN1/ELN	5
GO:0090066	regulation of anatomical structure size	11/183	484/15278	0.0315409	0.292006	0.262289	SPP1/ADRA1B/SEMA5A/PLXNA4/RET/AGT/RAP1GAP2/SCPEP1/ELN/FHOD3/ADRA1A	11
GO:0000187	activation of MAPK activity	5/183	147/15278	0.0319775	0.292006	0.262289	DUSP9/RET/AGT/ERN1/ERP29	5
GO:0006865	amino acid transport	5/183	147/15278	0.0319775	0.292006	0.262289	SLC7A11/AGT/SLC3A2/SLC38A2/SYT4	5
GO:0010977	negative regulation of neuron projection development	5/183	147/15278	0.0319775	0.292006	0.262289	SPP1/SEMA5A/B2M/LGALS1/RAP1GAP2	5
GO:0031214	biomineral tissue development	5/183	147/15278	0.0319775	0.292006	0.262289	SPP1/ATF4/COL1A1/SLC24A3/SLC20A1	5
GO:0110148	biomineralization	5/183	147/15278	0.0319775	0.292006	0.262289	SPP1/ATF4/COL1A1/SLC24A3/SLC20A1	5
GO:0019229	regulation of vasoconstriction	3/183	58/15278	0.0322579	0.292006	0.262289	ADRA1B/AGT/ADRA1A	3
GO:0022898	regulation of transmembrane transporter activity	7/183	252/15278	0.0322798	0.292006	0.262289	KCNAB1/RYR2/CRHR1/DLG4/OPRL1/ARC/CTSS	7
GO:0048659	smooth muscle cell proliferation	5/183	148/15278	0.0327866	0.292006	0.262289	IGFBP5/AGT/CDH13/ERN1/ELN	5
GO:0046883	regulation of hormone secretion	7/183	253/15278	0.0328759	0.292006	0.262289	SPP1/CCKAR/AGT/SYT9/CRHR1/MYRIP/ADCY8	7
GO:1901653	cellular response to peptide	9/183	367/15278	0.0328804	0.292006	0.262289	CAMK2A/AGT/ATP6V0B/ASS1/RANGAP1/CRHR1/ADCY8/SELENOS/ECHDC3	9
GO:0002026	regulation of the force of heart contraction	2/183	24/15278	0.0331376	0.292006	0.262289	RYR2/ADRA1A	2
GO:0032104	regulation of response to extracellular stimulus	2/183	24/15278	0.0331376	0.292006	0.262289	PRKCG/NUCB2	2
GO:0032107	regulation of response to nutrient levels	2/183	24/15278	0.0331376	0.292006	0.262289	PRKCG/NUCB2	2
GO:0034377	plasma lipoprotein particle assembly	2/183	24/15278	0.0331376	0.292006	0.262289	MFSD2A/P4HB	2
GO:0050927	positive regulation of positive chemotaxis	2/183	24/15278	0.0331376	0.292006	0.262289	SCG2/CDH13	2
GO:0071377	cellular response to glucagon stimulus	2/183	24/15278	0.0331376	0.292006	0.262289	ASS1/ADCY8	2
GO:0071880	adenylate cyclase-activating adrenergic receptor signaling pathway	2/183	24/15278	0.0331376	0.292006	0.262289	ADRA1B/ADRA1A	2
GO:0002262	myeloid cell homeostasis	5/183	149/15278	0.0336084	0.293416	0.263556	SLC7A11/B2M/ACVR1B/THRA/HSPA1B	5
GO:0010518	positive regulation of phospholipase activity	3/183	59/15278	0.0336951	0.293416	0.263556	ADCYAP1R1/AGT/ADRA1A	3
GO:0045454	cell redox homeostasis	3/183	59/15278	0.0336951	0.293416	0.263556	PDIA4/P4HB/SELENOS	3
GO:1903902	positive regulation of viral life cycle	3/183	59/15278	0.0336951	0.293416	0.263556	PPIB/LGALS1/P4HB	3
GO:0009267	cellular response to starvation	5/183	150/15278	0.0344429	0.299046	0.268612	SIK1/MFSD2A/SLC38A2/ATF4/GBA	5
GO:0055074	calcium ion homeostasis	10/183	431/15278	0.0349591	0.302637	0.271838	ADRA1B/ADCYAP1R1/AGT/RYR2/ATF4/DLG4/SLC24A3/OPRL1/ADCY8/ADRA1A	10
GO:1900449	regulation of glutamate receptor signaling pathway	3/183	60/15278	0.0351653	0.302839	0.27202	DLG4/ARC/UNC13A	3
GO:0099175	regulation of postsynapse organization	4/183	103/15278	0.0352618	0.302839	0.27202	SLC7A11/LRRC4B/LRP8/ARC	4
GO:0006665	sphingolipid metabolic process	5/183	151/15278	0.0352902	0.302839	0.27202	GLA/ST6GALNAC5/CTSA/GBA/CREM	5
GO:0048169	regulation of long-term neuronal synaptic plasticity	2/183	25/15278	0.0357406	0.303179	0.272325	AGT/DLG4	2
GO:0050926	regulation of positive chemotaxis	2/183	25/15278	0.0357406	0.303179	0.272325	SCG2/CDH13	2
GO:1904385	cellular response to angiotensin	2/183	25/15278	0.0357406	0.303179	0.272325	CAMK2A/AGT	2
GO:1904861	excitatory synapse assembly	2/183	25/15278	0.0357406	0.303179	0.272325	LRRC4B/NRXN2	2
GO:0002460	adaptive immune response based on somatic recombination of immune receptors built from immunoglobulin superfamily domains	7/183	258/15278	0.035967	0.304225	0.273265	CFI/B2M/FGL2/C1QA/C1QC/C1QB/HLA-DQB1	7
GO:0031960	response to corticosteroid	5/183	152/15278	0.0361503	0.304902	0.273873	PAM/FOS/ASS1/COL1A1/GBA	5
GO:0006006	glucose metabolic process	6/183	204/15278	0.0363177	0.305442	0.274357	SIK1/PGM5/ATF4/ALDOC/SELENOS/CREM	6
GO:0060997	dendritic spine morphogenesis	3/183	61/15278	0.0366681	0.307512	0.276217	LRP8/DLG4/ARC	3
GO:0016051	carbohydrate biosynthetic process	6/183	205/15278	0.0370559	0.308138	0.27678	SIK1/ADCYAP1R1/ST6GALNAC5/ATF4/ALDOC/SELENOS	6
GO:0031669	cellular response to nutrient levels	6/183	205/15278	0.0370559	0.308138	0.27678	SIK1/MFSD2A/SLC38A2/ATF4/COL1A1/GBA	6
GO:0045137	development of primary sexual characteristics	6/183	205/15278	0.0370559	0.308138	0.27678	MAMLD1/PTPRN/ADCYAP1R1/CITED2/ACVR1B/VGF	6
GO:0017156	calcium-ion regulated exocytosis	3/183	62/15278	0.0382035	0.31244	0.280643	SYT9/UNC13A/SYT4	3
GO:0031646	positive regulation of nervous system process	3/183	62/15278	0.0382035	0.31244	0.280643	DLG4/OPRL1/GBA	3
GO:1904705	regulation of vascular associated smooth muscle cell proliferation	3/183	62/15278	0.0382035	0.31244	0.280643	IGFBP5/AGT/ERN1	3
GO:1990874	vascular associated smooth muscle cell proliferation	3/183	62/15278	0.0382035	0.31244	0.280643	IGFBP5/AGT/ERN1	3
GO:0006221	pyrimidine nucleotide biosynthetic process	2/183	26/15278	0.03842	0.31244	0.280643	NME1/UCK2	2
GO:0140058	neuron projection arborization	2/183	26/15278	0.03842	0.31244	0.280643	MFSD2A/DLG4	2
GO:1900078	positive regulation of cellular response to insulin stimulus	2/183	26/15278	0.03842	0.31244	0.280643	AGT/ECHDC3	2
GO:1900120	regulation of receptor binding	2/183	26/15278	0.03842	0.31244	0.280643	ANXA2/B2M	2
GO:0034341	response to interferon-gamma	5/183	155/15278	0.0388079	0.314727	0.282698	CITED1/CAMK2A/B2M/ASS1/HLA-DQB1	5
GO:0032409	regulation of transporter activity	7/183	263/15278	0.039245	0.316455	0.28425	KCNAB1/RYR2/CRHR1/DLG4/OPRL1/ARC/CTSS	7
GO:0019935	cyclic-nucleotide-mediated signaling	6/183	208/15278	0.0393281	0.316455	0.28425	ADRA1B/ADCYAP1R1/CRHR1/OPRL1/ADCY8/ADRA1A	6
GO:0002697	regulation of immune effector process	9/183	380/15278	0.0396439	0.316455	0.28425	CFI/VSIG4/B2M/FGL2/KLK7/C1QA/C1QC/C1QB/RNF216	9
GO:0031623	receptor internalization	4/183	107/15278	0.0396948	0.316455	0.28425	SFRP4/CD63/DLG4/ARC	4
GO:0021543	pallium development	5/183	156/15278	0.0397196	0.316455	0.28425	COL3A1/MFSD2A/LRP8/SLC38A2/NME1	5
GO:0030307	positive regulation of cell growth	5/183	156/15278	0.0397196	0.316455	0.28425	SEMA5A/MFSD2A/CPNE5/UNC13A/SYT4	5
GO:0014743	regulation of muscle hypertrophy	3/183	63/15278	0.0397713	0.316455	0.28425	IGFBP5/AGT/ADRA1A	3
GO:0005996	monosaccharide metabolic process	7/183	264/15278	0.0399234	0.316811	0.28457	SIK1/FUCA1/PGM5/ATF4/ALDOC/SELENOS/CREM	7
GO:0070838	divalent metal ion transport	10/183	443/15278	0.0408985	0.319707	0.287171	CAMK2A/ANXA2/ADCYAP1R1/AGT/RYR2/SLC3A2/CRHR1/SLC24A3/OPRL1/ADRA1A	10
GO:0003180	aortic valve morphogenesis	2/183	27/15278	0.0411734	0.319707	0.287171	HEYL/ELN	2
GO:0007214	gamma-aminobutyric acid signaling pathway	2/183	27/15278	0.0411734	0.319707	0.287171	GABBR2/ATF4	2
GO:0008045	motor neuron axon guidance	2/183	27/15278	0.0411734	0.319707	0.287171	PLXNA4/LAMC2	2
GO:0065005	protein-lipid complex assembly	2/183	27/15278	0.0411734	0.319707	0.287171	MFSD2A/P4HB	2
GO:0071875	adrenergic receptor signaling pathway	2/183	27/15278	0.0411734	0.319707	0.287171	ADRA1B/ADRA1A	2
GO:0099560	synaptic membrane adhesion	2/183	27/15278	0.0411734	0.319707	0.287171	LRRC4B/MDGA1	2
GO:1903203	regulation of oxidative stress-induced neuron death	2/183	27/15278	0.0411734	0.319707	0.287171	SLC7A11/ATF4	2
GO:0097193	intrinsic apoptotic signaling pathway	7/183	266/15278	0.041303	0.319707	0.287171	CHAC1/ATF4/P4HB/ERN1/SELENOS/AEN/ERP29	7
GO:0042698	ovulation cycle	3/183	64/15278	0.0413713	0.319707	0.287171	PAM/PTPRN/OPRL1	3
GO:0060538	skeletal muscle organ development	5/183	158/15278	0.0415819	0.320496	0.287879	KCNAB1/FOS/HEYL/ASS1/ELN	5
GO:0072503	cellular divalent inorganic cation homeostasis	10/183	446/15278	0.0424856	0.32424	0.291243	ADRA1B/ADCYAP1R1/AGT/RYR2/ATF4/DLG4/SLC24A3/OPRL1/ADCY8/ADRA1A	10
GO:0009266	response to temperature stimulus	6/183	212/15278	0.042493	0.32424	0.291243	CAMK2A/FOS/THRA/HSPA1B/VGF/CRYAB	6
GO:0017157	regulation of exocytosis	6/183	212/15278	0.042493	0.32424	0.291243	CHRM2/PRKCG/SYT9/SLC4A8/SYT4/ADRA1A	6
GO:0051480	regulation of cytosolic calcium ion concentration	8/183	326/15278	0.0428192	0.32424	0.291243	ADRA1B/ADCYAP1R1/AGT/RYR2/DLG4/OPRL1/ADCY8/ADRA1A	8
GO:0032413	negative regulation of ion transmembrane transporter activity	3/183	65/15278	0.0430034	0.32424	0.291243	KCNAB1/CRHR1/OPRL1	3
GO:0060333	interferon-gamma-mediated signaling pathway	3/183	65/15278	0.0430034	0.32424	0.291243	CAMK2A/B2M/HLA-DQB1	3
GO:0046660	female sex differentiation	4/183	110/15278	0.0432189	0.32424	0.291243	PTPRN/ADCYAP1R1/ACVR1B/VGF	4
GO:0007411	axon guidance	7/183	269/15278	0.0434301	0.32424	0.291243	SEMA5A/PLXNA4/RET/RAP1GAP/EFNA3/LAMC2/LRTM2	7
GO:0032868	response to insulin	7/183	269/15278	0.0434301	0.32424	0.291243	CITED1/PTPRN/AGT/ATP6V0B/VGF/SELENOS/ECHDC3	7
GO:0009074	aromatic amino acid family catabolic process	2/183	28/15278	0.0439988	0.32424	0.291243	ASRGL1/AFMID	2
GO:0030511	positive regulation of transforming growth factor beta receptor signaling pathway	2/183	28/15278	0.0439988	0.32424	0.291243	CITED1/CITED2	2
GO:0046596	regulation of viral entry into host cell	2/183	28/15278	0.0439988	0.32424	0.291243	LGALS1/P4HB	2
GO:0048265	response to pain	2/183	28/15278	0.0439988	0.32424	0.291243	RET/PRKCG	2
GO:1900101	regulation of endoplasmic reticulum unfolded protein response	2/183	28/15278	0.0439988	0.32424	0.291243	ERN1/PPP1R15B	2
GO:1902235	regulation of endoplasmic reticulum stress-induced intrinsic apoptotic signaling pathway	2/183	28/15278	0.0439988	0.32424	0.291243	SELENOS/ERP29	2
GO:1903846	positive regulation of cellular response to transforming growth factor beta stimulus	2/183	28/15278	0.0439988	0.32424	0.291243	CITED1/CITED2	2
GO:1990776	response to angiotensin	2/183	28/15278	0.0439988	0.32424	0.291243	CAMK2A/AGT	2
GO:0000302	response to reactive oxygen species	6/183	214/15278	0.0441339	0.32424	0.291243	FOS/PTPRN/COL1A1/RNF112/PPP1R15B/CRYAB	6
GO:0097485	neuron projection guidance	7/183	270/15278	0.0441546	0.32424	0.291243	SEMA5A/PLXNA4/RET/RAP1GAP/EFNA3/LAMC2/LRTM2	7
GO:0032368	regulation of lipid transport	4/183	111/15278	0.0444316	0.324659	0.291618	SPP1/ANXA2/AGT/CRHR1	4
GO:0055007	cardiac muscle cell differentiation	4/183	111/15278	0.0444316	0.324659	0.291618	SIK1/AGT/FHOD3/ADRA1A	4
GO:0072511	divalent inorganic cation transport	10/183	450/15278	0.0446667	0.324774	0.291722	CAMK2A/ANXA2/ADCYAP1R1/AGT/RYR2/SLC3A2/CRHR1/SLC24A3/OPRL1/ADRA1A	10
GO:0071230	cellular response to amino acid stimulus	3/183	66/15278	0.0446674	0.324774	0.291722	COL3A1/ASS1/COL1A1	3
GO:0021700	developmental maturation	7/183	271/15278	0.0448869	0.325568	0.292436	PTPRN/RET/C1QA/CD63/DLG4/UNC13A/SYT4	7
GO:0003014	renal system process	4/183	112/15278	0.0456632	0.330387	0.296764	AGT/OPRL1/ADCY8/ADRA1A	4
GO:0009743	response to carbohydrate	6/183	216/15278	0.0458141	0.330668	0.297017	PTPRN/LGALS1/ERN1/NME1/ADCY8/SELENOS	6
GO:0006809	nitric oxide biosynthetic process	3/183	67/15278	0.0463632	0.33211	0.298311	GLA/AGT/ASS1	3
GO:0051260	protein homooligomerization	5/183	163/15278	0.0464663	0.33211	0.298311	B2M/RNF112/SAMHD1/ADCY8/ARC	5
GO:0060292	long-term synaptic depression	2/183	29/15278	0.0468941	0.33211	0.298311	ADCY8/ARC	2
GO:0099068	postsynapse assembly	2/183	29/15278	0.0468941	0.33211	0.298311	LRRC4B/NRXN2	2
GO:1904738	vascular associated smooth muscle cell migration	2/183	29/15278	0.0468941	0.33211	0.298311	IGFBP5/AGT	2
GO:1904752	regulation of vascular associated smooth muscle cell migration	2/183	29/15278	0.0468941	0.33211	0.298311	IGFBP5/AGT	2
GO:2000352	negative regulation of endothelial cell apoptotic process	2/183	29/15278	0.0468941	0.33211	0.298311	SEMA5A/SCG2	2
GO:0034763	negative regulation of transmembrane transport	4/183	113/15278	0.0469138	0.33211	0.298311	KCNAB1/CRHR1/OPRL1/SELENOS	4
GO:0048639	positive regulation of developmental growth	5/183	164/15278	0.0474824	0.335331	0.301204	SEMA5A/PPIB/CPNE5/UNC13A/SYT4	5
GO:0050768	negative regulation of neurogenesis	7/183	275/15278	0.0478943	0.337432	0.303092	SPP1/SEMA5A/B2M/COL3A1/LGALS1/RAP1GAP2/SYT4	7
GO:1990138	neuron projection extension	5/183	165/15278	0.0485118	0.339904	0.305312	SEMA5A/PLXNA4/CPNE5/UNC13A/SYT4	5
GO:0010517	regulation of phospholipase activity	3/183	69/15278	0.0498488	0.339904	0.305312	ADCYAP1R1/AGT/ADRA1A	3
GO:0015800	acidic amino acid transport	3/183	69/15278	0.0498488	0.339904	0.305312	SLC7A11/SLC38A2/SYT4	3
GO:0051937	catecholamine transport	3/183	69/15278	0.0498488	0.339904	0.305312	AGT/SYT9/SYT4	3
GO:0003298	physiological muscle hypertrophy	2/183	30/15278	0.0498572	0.339904	0.305312	AGT/ADRA1A	2
GO:0003301	physiological cardiac muscle hypertrophy	2/183	30/15278	0.0498572	0.339904	0.305312	AGT/ADRA1A	2
GO:0010613	positive regulation of cardiac muscle hypertrophy	2/183	30/15278	0.0498572	0.339904	0.305312	AGT/ADRA1A	2
GO:0030149	sphingolipid catabolic process	2/183	30/15278	0.0498572	0.339904	0.305312	GLA/GBA	2
GO:0036475	neuron death in response to oxidative stress	2/183	30/15278	0.0498572	0.339904	0.305312	SLC7A11/ATF4	2
GO:0045648	positive regulation of erythrocyte differentiation	2/183	30/15278	0.0498572	0.339904	0.305312	ACVR1B/HSPA1B	2
GO:0061049	cell growth involved in cardiac muscle cell development	2/183	30/15278	0.0498572	0.339904	0.305312	AGT/ADRA1A	2
GO:0070528	protein kinase C signaling	2/183	30/15278	0.0498572	0.339904	0.305312	DGKG/ADRA1A	2
GO:0071711	basement membrane organization	2/183	30/15278	0.0498572	0.339904	0.305312	LAMB3/CTSS	2
GO:0097106	postsynaptic density organization	2/183	30/15278	0.0498572	0.339904	0.305312	LRRC4B/NRXN2	2
GO:0062197	cellular response to chemical stress	8/183	337/15278	0.050252	0.341806	0.307021	ETV5/SLC7A11/FOS/ATF4/P4HB/RNF112/HSPA1B/SELENOS	8
GO:0042752	regulation of circadian rhythm	4/183	116/15278	0.0507793	0.344599	0.309529	SIK1/PRKCG/OPRL1/CREM	4
GO:1903201	regulation of oxidative stress-induced cell death	3/183	70/15278	0.0516384	0.347783	0.31239	SLC7A11/ATF4/P4HB	3
GO:0006813	potassium ion transport	6/183	223/15278	0.0520064	0.347783	0.31239	KCNAB1/DPP10/CD63/ATF4/SLC24A3/KCNQ2	6
GO:0030218	erythrocyte differentiation	4/183	117/15278	0.0521055	0.347783	0.31239	B2M/ACVR1B/THRA/HSPA1B	4
GO:0008217	regulation of blood pressure	5/183	169/15278	0.0527606	0.347783	0.31239	ADRA1B/AGT/SCPEP1/OPRL1/ADRA1A	5
GO:0003176	aortic valve development	2/183	31/15278	0.052886	0.347783	0.31239	HEYL/ELN	2
GO:0014072	response to isoquinoline alkaloid	2/183	31/15278	0.052886	0.347783	0.31239	PRKCG/ADCY8	2
GO:0014742	positive regulation of muscle hypertrophy	2/183	31/15278	0.052886	0.347783	0.31239	AGT/ADRA1A	2
GO:0043276	anoikis	2/183	31/15278	0.052886	0.347783	0.31239	SIK1/TLE5	2
GO:0043278	response to morphine	2/183	31/15278	0.052886	0.347783	0.31239	PRKCG/ADCY8	2
GO:0045761	regulation of adenylate cyclase activity	2/183	31/15278	0.052886	0.347783	0.31239	GABBR2/CRHR1	2
GO:0048841	regulation of axon extension involved in axon guidance	2/183	31/15278	0.052886	0.347783	0.31239	SEMA5A/PLXNA4	2
GO:0071312	cellular response to alkaloid	2/183	31/15278	0.052886	0.347783	0.31239	RYR2/ADCY8	2
GO:1901020	negative regulation of calcium ion transmembrane transporter activity	2/183	31/15278	0.052886	0.347783	0.31239	CRHR1/OPRL1	2
GO:0072507	divalent inorganic cation homeostasis	10/183	464/15278	0.052898	0.347783	0.31239	ADRA1B/ADCYAP1R1/AGT/RYR2/ATF4/DLG4/SLC24A3/OPRL1/ADCY8/ADRA1A	10
GO:0010660	regulation of muscle cell apoptotic process	3/183	71/15278	0.0534587	0.348367	0.312914	CAMK2A/AGT/ATF4	3
GO:0043407	negative regulation of MAP kinase activity	3/183	71/15278	0.0534587	0.348367	0.312914	DUSP9/AGT/GBA	3
GO:0050805	negative regulation of synaptic transmission	3/183	71/15278	0.0534587	0.348367	0.312914	ADCY8/ARC/SYT4	3
GO:1903524	positive regulation of blood circulation	3/183	71/15278	0.0534587	0.348367	0.312914	ADRA1B/RYR2/ADRA1A	3
GO:0045637	regulation of myeloid cell differentiation	6/183	225/15278	0.0538652	0.350242	0.314599	B2M/FOS/C1QC/ACVR1B/NME1/HSPA1B	6
GO:0030968	endoplasmic reticulum unfolded protein response	4/183	119/15278	0.0548144	0.352344	0.316486	ATF4/ERN1/PPP1R15B/SELENOS	4
GO:0003151	outflow tract morphogenesis	3/183	72/15278	0.0553097	0.352344	0.316486	CITED2/HEYL/ELN	3
GO:0009064	glutamine family amino acid metabolic process	3/183	72/15278	0.0553097	0.352344	0.316486	SLC7A11/ASRGL1/ASS1	3
GO:0033555	multicellular organismal response to stress	3/183	72/15278	0.0553097	0.352344	0.316486	ADCYAP1R1/RET/PRKCG	3
GO:0060193	positive regulation of lipase activity	3/183	72/15278	0.0553097	0.352344	0.316486	ADCYAP1R1/AGT/ADRA1A	3
GO:0060395	SMAD protein signal transduction	3/183	72/15278	0.0553097	0.352344	0.316486	CITED1/FOS/BTBD11	3
GO:0071229	cellular response to acid chemical	3/183	72/15278	0.0553097	0.352344	0.316486	COL3A1/ASS1/COL1A1	3
GO:1900034	regulation of cellular response to heat	3/183	72/15278	0.0553097	0.352344	0.316486	CAMK2A/HSPA1B/CRYAB	3
GO:0060560	developmental growth involved in morphogenesis	6/183	227/15278	0.0557639	0.352344	0.316486	SPP1/SEMA5A/PLXNA4/CPNE5/UNC13A/SYT4	6
GO:0007616	long-term memory	2/183	32/15278	0.0559787	0.352344	0.316486	ADCY8/ARC	2
GO:0033120	positive regulation of RNA splicing	2/183	32/15278	0.0559787	0.352344	0.316486	SLC38A2/ERN1	2
GO:0043243	positive regulation of protein-containing complex disassembly	2/183	32/15278	0.0559787	0.352344	0.316486	SEMA5A/GBA	2
GO:0045907	positive regulation of vasoconstriction	2/183	32/15278	0.0559787	0.352344	0.316486	ADRA1B/ADRA1A	2
GO:0046685	response to arsenic-containing substance	2/183	32/15278	0.0559787	0.352344	0.316486	SLC38A2/ATF4	2
GO:0099084	postsynaptic specialization organization	2/183	32/15278	0.0559787	0.352344	0.316486	LRRC4B/NRXN2	2
GO:0006814	sodium ion transport	6/183	228/15278	0.0567284	0.355546	0.319362	SIK1/SLC3A2/SLC4A8/SLC38A2/SLC24A3/SLC20A1	6
GO:0090257	regulation of muscle system process	6/183	228/15278	0.0567284	0.355546	0.319362	ADRA1B/IGFBP5/CHRM2/AGT/RYR2/ADRA1A	6
GO:0048678	response to axon injury	3/183	73/15278	0.057191	0.35693	0.320606	SPP1/LGALS1/RANGAP1	3
GO:0055013	cardiac muscle cell development	3/183	73/15278	0.057191	0.35693	0.320606	AGT/FHOD3/ADRA1A	3
GO:0008016	regulation of heart contraction	6/183	230/15278	0.0586873	0.360664	0.32396	ADRA1B/CHRM2/AGT/RYR2/THRA/ADRA1A	6
GO:0032410	negative regulation of transporter activity	3/183	74/15278	0.0591024	0.360664	0.32396	KCNAB1/CRHR1/OPRL1	3
GO:0010039	response to iron ion	2/183	33/15278	0.0591333	0.360664	0.32396	B2M/C1QA	2
GO:0016486	peptide hormone processing	2/183	33/15278	0.0591333	0.360664	0.32396	PCSK1/PCSK2	2
GO:0033762	response to glucagon	2/183	33/15278	0.0591333	0.360664	0.32396	ASS1/ADCY8	2
GO:0034405	response to fluid shear stress	2/183	33/15278	0.0591333	0.360664	0.32396	CITED2/ASS1	2
GO:0043267	negative regulation of potassium ion transport	2/183	33/15278	0.0591333	0.360664	0.32396	KCNAB1/ATF4	2
GO:0060416	response to growth hormone	2/183	33/15278	0.0591333	0.360664	0.32396	IGFBP5/ASS1	2
GO:0070306	lens fiber cell differentiation	2/183	33/15278	0.0591333	0.360664	0.32396	SLC7A11/ATF4	2
GO:0140448	signaling receptor ligand precursor processing	2/183	33/15278	0.0591333	0.360664	0.32396	PCSK1/PCSK2	2
GO:1905606	regulation of presynapse assembly	2/183	33/15278	0.0591333	0.360664	0.32396	LRRC4B/MDGA1	2
GO:0008361	regulation of cell size	5/183	175/15278	0.0595289	0.361583	0.324785	SPP1/SEMA5A/PLXNA4/RET/RAP1GAP2	5
GO:2000377	regulation of reactive oxygen species metabolic process	5/183	175/15278	0.0595289	0.361583	0.324785	GLA/AGT/ASS1/SELENOS/CRYAB	5
GO:0051924	regulation of calcium ion transport	6/183	232/15278	0.0606863	0.367008	0.329658	CAMK2A/ADCYAP1R1/AGT/RYR2/CRHR1/OPRL1	6
GO:0003018	vascular process in circulatory system	5/183	176/15278	0.0607031	0.367008	0.329658	ADRA1B/AGT/MFSD2A/SCPEP1/ADRA1A	5
GO:0010657	muscle cell apoptotic process	3/183	75/15278	0.0610436	0.367008	0.329658	CAMK2A/AGT/ATF4	3
GO:0022617	extracellular matrix disassembly	3/183	75/15278	0.0610436	0.367008	0.329658	KLK7/LCP1/CTSS	3
GO:0071260	cellular response to mechanical stimulus	3/183	75/15278	0.0610436	0.367008	0.329658	AGT/SLC38A2/COL1A1	3
GO:0034101	erythrocyte homeostasis	4/183	124/15278	0.061914	0.37107	0.333307	B2M/ACVR1B/THRA/HSPA1B	4
GO:0032228	regulation of synaptic transmission, GABAergic	2/183	34/15278	0.0623478	0.37107	0.333307	SYN3/ADRA1A	2
GO:0033363	secretory granule organization	2/183	34/15278	0.0623478	0.37107	0.333307	PTPRN/SYT4	2
GO:0052372	modulation by symbiont of entry into host	2/183	34/15278	0.0623478	0.37107	0.333307	LGALS1/P4HB	2
GO:0099174	regulation of presynapse organization	2/183	34/15278	0.0623478	0.37107	0.333307	LRRC4B/MDGA1	2
GO:0042310	vasoconstriction	3/183	76/15278	0.0630144	0.373984	0.335924	ADRA1B/AGT/ADRA1A	3
GO:1901136	carbohydrate derivative catabolic process	5/183	178/15278	0.0630907	0.373984	0.335924	GLA/FUCA1/SAMHD1/GBA/ACAN	5
GO:0031330	negative regulation of cellular catabolic process	6/183	235/15278	0.0637603	0.37687	0.338517	ANXA2/TENT5A/PRKCG/MFSD2A/CTSA/ADRA1A	6
GO:0015850	organic hydroxy compound transport	6/183	236/15278	0.0648051	0.37687	0.338517	SPP1/ANXA2/AGT/SYT9/CRHR1/SYT4	6
GO:0043588	skin development	7/183	295/15278	0.0648397	0.37687	0.338517	COL3A1/IGFBP5/KRT78/ACVR1B/COL1A1/GBA/ADAMTS2	7
GO:0014031	mesenchymal cell development	3/183	77/15278	0.0650145	0.37687	0.338517	SEMA5A/RET/HEYL	3
GO:0021766	hippocampus development	3/183	77/15278	0.0650145	0.37687	0.338517	MFSD2A/LRP8/NME1	3
GO:0055117	regulation of cardiac muscle contraction	3/183	77/15278	0.0650145	0.37687	0.338517	ADRA1B/RYR2/ADRA1A	3
GO:0007190	activation of adenylate cyclase activity	2/183	35/15278	0.0656204	0.37687	0.338517	CRHR1/ADCY8	2
GO:0009163	nucleoside biosynthetic process	2/183	35/15278	0.0656204	0.37687	0.338517	NME1/UCK2	2
GO:0014046	dopamine secretion	2/183	35/15278	0.0656204	0.37687	0.338517	SYT9/SYT4	2
GO:0014059	regulation of dopamine secretion	2/183	35/15278	0.0656204	0.37687	0.338517	SYT9/SYT4	2
GO:0032094	response to food	2/183	35/15278	0.0656204	0.37687	0.338517	PRKCG/NUCB2	2
GO:0032892	positive regulation of organic acid transport	2/183	35/15278	0.0656204	0.37687	0.338517	AGT/SYT4	2
GO:0050931	pigment cell differentiation	2/183	35/15278	0.0656204	0.37687	0.338517	CITED1/CD63	2
GO:0051955	regulation of amino acid transport	2/183	35/15278	0.0656204	0.37687	0.338517	AGT/SYT4	2
GO:0072528	pyrimidine-containing compound biosynthetic process	2/183	35/15278	0.0656204	0.37687	0.338517	NME1/UCK2	2
GO:1903170	negative regulation of calcium ion transmembrane transport	2/183	35/15278	0.0656204	0.37687	0.338517	CRHR1/OPRL1	2
GO:0051961	negative regulation of nervous system development	7/183	297/15278	0.0667114	0.380602	0.341868	SPP1/SEMA5A/B2M/COL3A1/LGALS1/RAP1GAP2/SYT4	7
GO:0048732	gland development	9/183	421/15278	0.0669769	0.380602	0.341868	ETV5/PAM/IGFBP5/CITED2/DBP/ASS1/THRA/NME1/PRKCSH	9
GO:0002088	lens development in camera-type eye	3/183	78/15278	0.0670437	0.380602	0.341868	SLC7A11/ATF4/CRYAB	3
GO:0048145	regulation of fibroblast proliferation	3/183	78/15278	0.0670437	0.380602	0.341868	ANXA2/AGT/C1QL4	3
GO:1904035	regulation of epithelial cell apoptotic process	3/183	78/15278	0.0670437	0.380602	0.341868	SEMA5A/SCG2/SFRP4	3
GO:1904063	negative regulation of cation transmembrane transport	3/183	78/15278	0.0670437	0.380602	0.341868	KCNAB1/CRHR1/OPRL1	3
GO:0010769	regulation of cell morphogenesis involved in differentiation	7/183	298/15278	0.0676594	0.382626	0.343687	SPP1/SEMA5A/PLXNA4/RET/LRP8/P4HB/ARC	7
GO:0098656	anion transmembrane transport	7/183	298/15278	0.0676594	0.382626	0.343687	SLC7A11/AGT/SLC3A2/SLC4A8/SLC38A2/SLC24A3/SLC20A1	7
GO:0000413	protein peptidyl-prolyl isomerization	2/183	36/15278	0.0689492	0.383037	0.344056	PPIB/FKBP11	2
GO:0048846	axon extension involved in axon guidance	2/183	36/15278	0.0689492	0.383037	0.344056	SEMA5A/PLXNA4	2
GO:0051954	positive regulation of amine transport	2/183	36/15278	0.0689492	0.383037	0.344056	AGT/SYT4	2
GO:0071709	membrane assembly	2/183	36/15278	0.0689492	0.383037	0.344056	ANXA2/NRXN2	2
GO:0072210	metanephric nephron development	2/183	36/15278	0.0689492	0.383037	0.344056	CITED1/RET	2
GO:1901385	regulation of voltage-gated calcium channel activity	2/183	36/15278	0.0689492	0.383037	0.344056	CRHR1/OPRL1	2
GO:1902284	neuron projection extension involved in neuron projection guidance	2/183	36/15278	0.0689492	0.383037	0.344056	SEMA5A/PLXNA4	2
GO:1905314	semi-lunar valve development	2/183	36/15278	0.0689492	0.383037	0.344056	HEYL/ELN	2
GO:0048144	fibroblast proliferation	3/183	79/15278	0.0691015	0.383037	0.344056	ANXA2/AGT/C1QL4	3
GO:0055006	cardiac cell development	3/183	79/15278	0.0691015	0.383037	0.344056	AGT/FHOD3/ADRA1A	3
GO:0007264	small GTPase mediated signal transduction	10/183	488/15278	0.0692445	0.383037	0.344056	ARHGAP36/ARHGEF28/COL3A1/ADCYAP1R1/CDH13/NUCB2/RAP1GAP/RASGRP3/RAP1GAP2/ADRA1A	10
GO:0043112	receptor metabolic process	5/183	183/15278	0.0692893	0.383037	0.344056	ANXA2/SFRP4/CD63/DLG4/ARC	5
GO:1903900	regulation of viral life cycle	4/183	130/15278	0.0710427	0.390413	0.350681	PPIB/LGALS1/P4HB/BTBD17	4
GO:0006890	retrograde vesicle-mediated transport, Golgi to endoplasmic reticulum	3/183	80/15278	0.0711879	0.390413	0.350681	RAB6B/KDELR2/TMED3	3
GO:0015844	monoamine transport	3/183	80/15278	0.0711879	0.390413	0.350681	AGT/SYT9/SYT4	3
GO:1901379	regulation of potassium ion transmembrane transport	3/183	80/15278	0.0711879	0.390413	0.350681	KCNAB1/DPP10/CD63	3
GO:0045927	positive regulation of growth	6/183	242/15278	0.0712847	0.390413	0.350681	SEMA5A/PPIB/MFSD2A/CPNE5/UNC13A/SYT4	6
GO:0050679	positive regulation of epithelial cell proliferation	5/183	185/15278	0.07186	0.392835	0.352856	SEMA5A/PTPRN/SCG2/CDH13/NME1	5
GO:0090184	positive regulation of kidney development	2/183	37/15278	0.0723325	0.393958	0.353866	RET/AGT	2
GO:1901659	glycosyl compound biosynthetic process	2/183	37/15278	0.0723325	0.393958	0.353866	NME1/UCK2	2
GO:1901214	regulation of neuron death	7/183	303/15278	0.0725213	0.394113	0.354004	SLC7A11/CITED1/FOS/PRKCG/C1QA/ATF4/GBA	7
GO:0031333	negative regulation of protein-containing complex assembly	4/183	131/15278	0.0726278	0.394113	0.354004	THRA/GBA/FHOD3/CRYAB	4
GO:0007193	adenylate cyclase-inhibiting G protein-coupled receptor signaling pathway	3/183	81/15278	0.0733023	0.395591	0.355333	CHRM2/OPRL1/ADCY8	3
GO:0097061	dendritic spine organization	3/183	81/15278	0.0733023	0.395591	0.355333	LRP8/DLG4/ARC	3
GO:0097756	negative regulation of blood vessel diameter	3/183	81/15278	0.0733023	0.395591	0.355333	ADRA1B/AGT/ADRA1A	3
GO:0030072	peptide hormone secretion	6/183	244/15278	0.0735249	0.396068	0.355761	PTPRN/SYT9/CRHR1/MYRIP/ADCY8/VGF	6
GO:0035296	regulation of tube diameter	4/183	132/15278	0.0742309	0.397694	0.357222	ADRA1B/AGT/SCPEP1/ADRA1A	4
GO:0042542	response to hydrogen peroxide	4/183	132/15278	0.0742309	0.397694	0.357222	COL1A1/RNF112/PPP1R15B/CRYAB	4
GO:0097746	regulation of blood vessel diameter	4/183	132/15278	0.0742309	0.397694	0.357222	ADRA1B/AGT/SCPEP1/ADRA1A	4
GO:0007517	muscle organ development	8/183	367/15278	0.0745951	0.398425	0.357878	KCNAB1/FOS/COL3A1/RYR2/HEYL/ASS1/ELN/CRYAB	8
GO:0006749	glutathione metabolic process	2/183	38/15278	0.0757684	0.398425	0.357878	SLC7A11/CHAC1	2
GO:0014911	positive regulation of smooth muscle cell migration	2/183	38/15278	0.0757684	0.398425	0.357878	IGFBP5/AGT	2
GO:0071526	semaphorin-plexin signaling pathway	2/183	38/15278	0.0757684	0.398425	0.357878	SEMA5A/PLXNA4	2
GO:0090207	regulation of triglyceride metabolic process	2/183	38/15278	0.0757684	0.398425	0.357878	SIK1/MFSD2A	2
GO:0007266	Rho protein signal transduction	4/183	133/15278	0.0758519	0.398425	0.357878	ARHGEF28/COL3A1/CDH13/ADRA1A	4
GO:0031644	regulation of nervous system process	4/183	133/15278	0.0758519	0.398425	0.357878	AGT/DLG4/OPRL1/GBA	4
GO:0035150	regulation of tube size	4/183	133/15278	0.0758519	0.398425	0.357878	ADRA1B/AGT/SCPEP1/ADRA1A	4
GO:0051224	negative regulation of protein transport	4/183	133/15278	0.0758519	0.398425	0.357878	RANGAP1/CABP1/ERP29/SYT4	4
GO:0072006	nephron development	4/183	133/15278	0.0758519	0.398425	0.357878	CITED1/RET/AGT/HEYL	4
GO:0072073	kidney epithelium development	4/183	133/15278	0.0758519	0.398425	0.357878	CITED1/RET/AGT/HEYL	4
GO:0007626	locomotory behavior	5/183	189/15278	0.077157	0.403377	0.362326	ETV5/KLHL1/DLG4/OPRL1/ADCY8	5
GO:0030879	mammary gland development	4/183	134/15278	0.0774907	0.403377	0.362326	ETV5/PAM/IGFBP5/NME1	4
GO:0002832	negative regulation of response to biotic stimulus	3/183	83/15278	0.0776145	0.403377	0.362326	VSIG4/FGL2/SAMHD1	3
GO:0035023	regulation of Rho protein signal transduction	3/183	83/15278	0.0776145	0.403377	0.362326	ARHGEF28/COL3A1/ADRA1A	3
GO:0050818	regulation of coagulation	3/183	83/15278	0.0776145	0.403377	0.362326	ANXA5/ANXA2/VKORC1	3
GO:1900407	regulation of cellular response to oxidative stress	3/183	83/15278	0.0776145	0.403377	0.362326	SLC7A11/ATF4/P4HB	3
GO:0001889	liver development	4/183	135/15278	0.0791472	0.407599	0.366118	CITED2/DBP/ASS1/PRKCSH	4
GO:0010665	regulation of cardiac muscle cell apoptotic process	2/183	39/15278	0.0792554	0.407599	0.366118	CAMK2A/AGT	2
GO:0019432	triglyceride biosynthetic process	2/183	39/15278	0.0792554	0.407599	0.366118	SIK1/MFSD2A	2
GO:0045429	positive regulation of nitric oxide biosynthetic process	2/183	39/15278	0.0792554	0.407599	0.366118	AGT/ASS1	2
GO:0071548	response to dexamethasone	2/183	39/15278	0.0792554	0.407599	0.366118	ASS1/GBA	2
GO:1902991	regulation of amyloid precursor protein catabolic process	2/183	39/15278	0.0792554	0.407599	0.366118	EFNA3/UNC13A	2
GO:1901019	regulation of calcium ion transmembrane transporter activity	3/183	84/15278	0.0798116	0.409746	0.368047	RYR2/CRHR1/OPRL1	3
GO:0007548	sex differentiation	6/183	250/15278	0.0804854	0.412488	0.370509	MAMLD1/PTPRN/ADCYAP1R1/CITED2/ACVR1B/VGF	6
GO:1904950	negative regulation of establishment of protein localization	4/183	136/15278	0.0808213	0.413491	0.371411	RANGAP1/CABP1/ERP29/SYT4	4
GO:0060348	bone development	5/183	192/15278	0.0812648	0.414238	0.372082	PPIB/ANXA2/SFRP4/COL1A1/VKORC1	5
GO:1901605	alpha-amino acid metabolic process	5/183	192/15278	0.0812648	0.414238	0.372082	SLC7A11/ASRGL1/ASS1/ATF4/AFMID	5
GO:0001523	retinoid metabolic process	3/183	85/15278	0.0820356	0.414238	0.372082	LRP8/SCPEP1/CYP4V2	3
GO:0003073	regulation of systemic arterial blood pressure	3/183	85/15278	0.0820356	0.414238	0.372082	ADRA1B/AGT/ADRA1A	3
GO:0043502	regulation of muscle adaptation	3/183	85/15278	0.0820356	0.414238	0.372082	IGFBP5/AGT/ADRA1A	3
GO:0045921	positive regulation of exocytosis	3/183	85/15278	0.0820356	0.414238	0.372082	SYT9/SLC4A8/SYT4	3
GO:0051384	response to glucocorticoid	4/183	137/15278	0.082513	0.414238	0.372082	PAM/FOS/ASS1/GBA	4
GO:0071346	cellular response to interferon-gamma	4/183	137/15278	0.082513	0.414238	0.372082	CAMK2A/B2M/ASS1/HLA-DQB1	4
GO:1904064	positive regulation of cation transmembrane transport	4/183	137/15278	0.082513	0.414238	0.372082	AGT/RYR2/ARC/CTSS	4
GO:0042594	response to starvation	5/183	193/15278	0.0826596	0.414238	0.372082	SIK1/MFSD2A/SLC38A2/ATF4/GBA	5
GO:0006220	pyrimidine nucleotide metabolic process	2/183	40/15278	0.0827916	0.414238	0.372082	NME1/UCK2	2
GO:0009072	aromatic amino acid family metabolic process	2/183	40/15278	0.0827916	0.414238	0.372082	ASRGL1/AFMID	2
GO:1904407	positive regulation of nitric oxide metabolic process	2/183	40/15278	0.0827916	0.414238	0.372082	AGT/ASS1	2
GO:0006898	receptor-mediated endocytosis	6/183	253/15278	0.0841001	0.418173	0.375616	ANXA2/B2M/SFRP4/CD63/DLG4/ARC	6
GO:0061008	hepaticobiliary system development	4/183	138/15278	0.084222	0.418173	0.375616	CITED2/DBP/ASS1/PRKCSH	4
GO:0003300	cardiac muscle hypertrophy	3/183	86/15278	0.0842863	0.418173	0.375616	AGT/RYR2/ADRA1A	3
GO:0007589	body fluid secretion	3/183	86/15278	0.0842863	0.418173	0.375616	PAM/ANXA2/NME1	3
GO:0072080	nephron tubule development	3/183	86/15278	0.0842863	0.418173	0.375616	CITED1/AGT/HEYL	3
GO:0051056	regulation of small GTPase mediated signal transduction	7/183	315/15278	0.0850169	0.418686	0.376077	ARHGAP36/ARHGEF28/COL3A1/ADCYAP1R1/RAP1GAP/RAP1GAP2/ADRA1A	7
GO:0035051	cardiocyte differentiation	4/183	139/15278	0.0859484	0.418686	0.376077	SIK1/AGT/FHOD3/ADRA1A	4
GO:1905039	carboxylic acid transmembrane transport	4/183	139/15278	0.0859484	0.418686	0.376077	SLC7A11/AGT/SLC3A2/SLC38A2	4
GO:0010662	regulation of striated muscle cell apoptotic process	2/183	41/15278	0.0863753	0.418686	0.376077	CAMK2A/AGT	2
GO:0017158	regulation of calcium ion-dependent exocytosis	2/183	41/15278	0.0863753	0.418686	0.376077	SYT9/SYT4	2
GO:0032924	activin receptor signaling pathway	2/183	41/15278	0.0863753	0.418686	0.376077	CITED2/ACVR1B	2
GO:0035307	positive regulation of protein dephosphorylation	2/183	41/15278	0.0863753	0.418686	0.376077	PPP1R15B/GBA	2
GO:0044091	membrane biogenesis	2/183	41/15278	0.0863753	0.418686	0.376077	ANXA2/NRXN2	2
GO:0046189	phenol-containing compound biosynthetic process	2/183	41/15278	0.0863753	0.418686	0.376077	SLC7A11/CITED1	2
GO:0048286	lung alveolus development	2/183	41/15278	0.0863753	0.418686	0.376077	SLC7A11/IGFBP5	2
GO:0048483	autonomic nervous system development	2/183	41/15278	0.0863753	0.418686	0.376077	PLXNA4/RET	2
GO:0072595	maintenance of protein localization in organelle	2/183	41/15278	0.0863753	0.418686	0.376077	RANGAP1/KDELR2	2
GO:1904036	negative regulation of epithelial cell apoptotic process	2/183	41/15278	0.0863753	0.418686	0.376077	SEMA5A/SCG2	2
GO:2001222	regulation of neuron migration	2/183	41/15278	0.0863753	0.418686	0.376077	CAMK2A/COL3A1	2
GO:0051952	regulation of amine transport	3/183	87/15278	0.0865632	0.418909	0.376277	AGT/SYT9/SYT4	3
GO:0010721	negative regulation of cell development	7/183	317/15278	0.0872127	0.420879	0.378047	SPP1/SEMA5A/B2M/COL3A1/LGALS1/RAP1GAP2/SYT4	7
GO:1903825	organic acid transmembrane transport	4/183	140/15278	0.0876921	0.420879	0.378047	SLC7A11/AGT/SLC3A2/SLC38A2	4
GO:0061326	renal tubule development	3/183	88/15278	0.0888661	0.420879	0.378047	CITED1/AGT/HEYL	3
GO:0010659	cardiac muscle cell apoptotic process	2/183	42/15278	0.090005	0.420879	0.378047	CAMK2A/AGT	2
GO:0015804	neutral amino acid transport	2/183	42/15278	0.090005	0.420879	0.378047	SLC3A2/SLC38A2	2
GO:0035094	response to nicotine	2/183	42/15278	0.090005	0.420879	0.378047	SLC7A11/B2M	2
GO:0042149	cellular response to glucose starvation	2/183	42/15278	0.090005	0.420879	0.378047	SIK1/ATF4	2
GO:0060412	ventricular septum morphogenesis	2/183	42/15278	0.090005	0.420879	0.378047	CITED2/HEYL	2
GO:0090317	negative regulation of intracellular protein transport	2/183	42/15278	0.090005	0.420879	0.378047	RANGAP1/CABP1	2
GO:1902667	regulation of axon guidance	2/183	42/15278	0.090005	0.420879	0.378047	SEMA5A/PLXNA4	2
GO:0106027	neuron projection organization	3/183	89/15278	0.0911946	0.420879	0.378047	LRP8/DLG4/ARC	3
GO:1903426	regulation of reactive oxygen species biosynthetic process	3/183	89/15278	0.0911946	0.420879	0.378047	GLA/AGT/ASS1	3
GO:0071805	potassium ion transmembrane transport	5/183	199/15278	0.0912942	0.420879	0.378047	KCNAB1/DPP10/CD63/SLC24A3/KCNQ2	5
GO:0016485	protein processing	5/183	200/15278	0.0927771	0.420879	0.378047	PCSK1/CHAC1/PCSK2/CTSS/ADAMTS2	5
GO:1901215	negative regulation of neuron death	5/183	200/15278	0.0927771	0.420879	0.378047	SLC7A11/CITED1/PRKCG/ATF4/GBA	5
GO:0007178	transmembrane receptor protein serine/threonine kinase signaling pathway	7/183	322/15278	0.0928428	0.420879	0.378047	CITED1/FOS/COL3A1/SFRP4/CITED2/ACVR1B/BTBD11	7
GO:0060047	heart contraction	6/183	260/15278	0.0928796	0.420879	0.378047	ADRA1B/CHRM2/AGT/RYR2/THRA/ADRA1A	6
GO:1905952	regulation of lipid localization	4/183	143/15278	0.0930252	0.420879	0.378047	SPP1/ANXA2/AGT/CRHR1	4
GO:0030099	myeloid cell differentiation	8/183	386/15278	0.0931637	0.420879	0.378047	ANXA2/B2M/FOS/C1QC/ACVR1B/THRA/NME1/HSPA1B	8
GO:0034766	negative regulation of ion transmembrane transport	3/183	90/15278	0.0935484	0.420879	0.378047	KCNAB1/CRHR1/OPRL1	3
GO:0010677	negative regulation of cellular carbohydrate metabolic process	2/183	43/15278	0.0936791	0.420879	0.378047	SIK1/SELENOS	2
GO:0030574	collagen catabolic process	2/183	43/15278	0.0936791	0.420879	0.378047	CTSS/ADAMTS2	2
GO:0044060	regulation of endocrine process	2/183	43/15278	0.0936791	0.420879	0.378047	AGT/CRHR1	2
GO:0085029	extracellular matrix assembly	2/183	43/15278	0.0936791	0.420879	0.378047	AGT/LAMB3	2
GO:2001239	regulation of extrinsic apoptotic signaling pathway in absence of ligand	2/183	43/15278	0.0936791	0.420879	0.378047	RET/HSPA1B	2
GO:0006520	cellular amino acid metabolic process	7/183	323/15278	0.0939929	0.420879	0.378047	SLC7A11/TARS1/ASRGL1/ASS1/ATF4/AFMID/LARS2	7
GO:0030073	insulin secretion	5/183	202/15278	0.0957801	0.420879	0.378047	PTPRN/SYT9/MYRIP/ADCY8/VGF	5
GO:0006942	regulation of striated muscle contraction	3/183	91/15278	0.0959272	0.420879	0.378047	ADRA1B/RYR2/ADRA1A	3
GO:0016101	diterpenoid metabolic process	3/183	91/15278	0.0959272	0.420879	0.378047	LRP8/SCPEP1/CYP4V2	3
GO:1901655	cellular response to ketone	3/183	91/15278	0.0959272	0.420879	0.378047	SPP1/ASS1/ADCY8	3
GO:0048545	response to steroid hormone	7/183	325/15278	0.0963169	0.420879	0.378047	SPP1/PAM/FOS/HEYL/ASS1/COL1A1/GBA	7
GO:0007409	axonogenesis	9/183	455/15278	0.096966	0.420879	0.378047	SPP1/CCKAR/SEMA5A/PLXNA4/RET/RAP1GAP/EFNA3/LAMC2/LRTM2	9
GO:0033002	muscle cell proliferation	5/183	203/15278	0.0973001	0.420879	0.378047	IGFBP5/AGT/CDH13/ERN1/ELN	5
GO:0002762	negative regulation of myeloid leukocyte differentiation	2/183	44/15278	0.097396	0.420879	0.378047	C1QC/NME1	2
GO:0006418	tRNA aminoacylation for protein translation	2/183	44/15278	0.097396	0.420879	0.378047	TARS1/LARS2	2
GO:0010658	striated muscle cell apoptotic process	2/183	44/15278	0.097396	0.420879	0.378047	CAMK2A/AGT	2
GO:0014047	glutamate secretion	2/183	44/15278	0.097396	0.420879	0.378047	SLC38A2/SYT4	2
GO:0022602	ovulation cycle process	2/183	44/15278	0.097396	0.420879	0.378047	PAM/PTPRN	2
GO:0034198	cellular response to amino acid starvation	2/183	44/15278	0.097396	0.420879	0.378047	SLC38A2/ATF4	2
GO:0042398	cellular modified amino acid biosynthetic process	2/183	44/15278	0.097396	0.420879	0.378047	SLC7A11/CHAC1	2
GO:0060443	mammary gland morphogenesis	2/183	44/15278	0.097396	0.420879	0.378047	ETV5/IGFBP5	2
GO:0051146	striated muscle cell differentiation	6/183	264/15278	0.0981113	0.420879	0.378047	SIK1/IGFBP5/AGT/PGM5/FHOD3/ADRA1A	6
GO:1902882	regulation of response to oxidative stress	3/183	92/15278	0.0983306	0.420879	0.378047	SLC7A11/ATF4/P4HB	3
GO:0002440	production of molecular mediator of immune response	5/183	205/15278	0.100377	0.420879	0.378047	B2M/FGL2/KLK7/SAMHD1/HLA-DQB1	5
GO:0001657	ureteric bud development	3/183	93/15278	0.100758	0.420879	0.378047	CITED1/RET/AGT	3
GO:0006672	ceramide metabolic process	3/183	93/15278	0.100758	0.420879	0.378047	GLA/ST6GALNAC5/GBA	3
GO:0006835	dicarboxylic acid transport	3/183	93/15278	0.100758	0.420879	0.378047	SLC7A11/SLC38A2/SYT4	3
GO:0007218	neuropeptide signaling pathway	3/183	93/15278	0.100758	0.420879	0.378047	NPB/PDYN/OPRL1	3
GO:0060191	regulation of lipase activity	3/183	93/15278	0.100758	0.420879	0.378047	ADCYAP1R1/AGT/ADRA1A	3
GO:1901216	positive regulation of neuron death	3/183	93/15278	0.100758	0.420879	0.378047	FOS/C1QA/ATF4	3
GO:1902106	negative regulation of leukocyte differentiation	3/183	93/15278	0.100758	0.420879	0.378047	FGL2/C1QC/NME1	3
GO:0010043	response to zinc ion	2/183	45/15278	0.101154	0.420879	0.378047	PAM/ASS1	2
GO:0014075	response to amine	2/183	45/15278	0.101154	0.420879	0.378047	ASS1/NME1	2
GO:0031279	regulation of cyclase activity	2/183	45/15278	0.101154	0.420879	0.378047	GABBR2/CRHR1	2
GO:0032715	negative regulation of interleukin-6 production	2/183	45/15278	0.101154	0.420879	0.378047	GBA/SELENOS	2
GO:0048066	developmental pigmentation	2/183	45/15278	0.101154	0.420879	0.378047	CITED1/CD63	2
GO:0060986	endocrine hormone secretion	2/183	45/15278	0.101154	0.420879	0.378047	AGT/CRHR1	2
GO:0050673	epithelial cell proliferation	8/183	394/15278	0.101713	0.420879	0.378047	SEMA5A/B2M/IGFBP5/PTPRN/SCG2/CDH13/ERN1/NME1	8
GO:0007519	skeletal muscle tissue development	4/183	148/15278	0.102248	0.420879	0.378047	KCNAB1/FOS/HEYL/ELN	4
GO:0045639	positive regulation of myeloid cell differentiation	3/183	94/15278	0.10321	0.420879	0.378047	FOS/ACVR1B/HSPA1B	3
GO:0060419	heart growth	3/183	94/15278	0.10321	0.420879	0.378047	DUSP9/AGT/ADRA1A	3
GO:0072163	mesonephric epithelium development	3/183	94/15278	0.10321	0.420879	0.378047	CITED1/RET/AGT	3
GO:0072164	mesonephric tubule development	3/183	94/15278	0.10321	0.420879	0.378047	CITED1/RET/AGT	3
GO:0048738	cardiac muscle tissue development	5/183	207/15278	0.103502	0.420879	0.378047	SIK1/AGT/RYR2/FHOD3/ADRA1A	5
GO:0010770	positive regulation of cell morphogenesis involved in differentiation	4/183	149/15278	0.104141	0.420879	0.378047	SEMA5A/PLXNA4/LRP8/P4HB	4
GO:0006111	regulation of gluconeogenesis	2/183	46/15278	0.104952	0.420879	0.378047	SIK1/SELENOS	2
GO:0007595	lactation	2/183	46/15278	0.104952	0.420879	0.378047	PAM/NME1	2
GO:0043039	tRNA aminoacylation	2/183	46/15278	0.104952	0.420879	0.378047	TARS1/LARS2	2
GO:0045668	negative regulation of osteoblast differentiation	2/183	46/15278	0.104952	0.420879	0.378047	CITED1/IGFBP5	2
GO:0099054	presynapse assembly	2/183	46/15278	0.104952	0.420879	0.378047	LRRC4B/MDGA1	2
GO:1900271	regulation of long-term synaptic potentiation	2/183	46/15278	0.104952	0.420879	0.378047	ADCY8/ARC	2
GO:1903573	negative regulation of response to endoplasmic reticulum stress	2/183	46/15278	0.104952	0.420879	0.378047	PPP1R15B/SELENOS	2
GO:0031348	negative regulation of defense response	5/183	208/15278	0.105082	0.420879	0.378047	VSIG4/FGL2/SAMHD1/GBA/SELENOS	5
GO:0097191	extrinsic apoptotic signaling pathway	5/183	208/15278	0.105082	0.420879	0.378047	SCG2/RET/AGT/ACVR1B/HSPA1B	5
GO:0015837	amine transport	3/183	95/15278	0.105685	0.420879	0.378047	AGT/SYT9/SYT4	3
GO:0043255	regulation of carbohydrate biosynthetic process	3/183	95/15278	0.105685	0.420879	0.378047	SIK1/ADCYAP1R1/SELENOS	3
GO:2001236	regulation of extrinsic apoptotic signaling pathway	4/183	150/15278	0.106051	0.420879	0.378047	SCG2/RET/AGT/HSPA1B	4
GO:0003015	heart process	6/183	270/15278	0.106247	0.420879	0.378047	ADRA1B/CHRM2/AGT/RYR2/THRA/ADRA1A	6
GO:0034767	positive regulation of ion transmembrane transport	4/183	151/15278	0.107976	0.420879	0.378047	AGT/RYR2/ARC/CTSS	4
GO:0006906	vesicle fusion	3/183	96/15278	0.108184	0.420879	0.378047	ANXA2/SYT9/SYT4	3
GO:0007215	glutamate receptor signaling pathway	3/183	96/15278	0.108184	0.420879	0.378047	DLG4/ARC/UNC13A	3
GO:0035335	peptidyl-tyrosine dephosphorylation	3/183	96/15278	0.108184	0.420879	0.378047	DUSP9/PTPRN/PTPRT	3
GO:0071868	cellular response to monoamine stimulus	3/183	96/15278	0.108184	0.420879	0.378047	CHRM2/RYR2/ATF4	3
GO:0071870	cellular response to catecholamine stimulus	3/183	96/15278	0.108184	0.420879	0.378047	CHRM2/RYR2/ATF4	3
GO:0006654	phosphatidic acid biosynthetic process	2/183	47/15278	0.108788	0.420879	0.378047	DGKG/ABHD8	2
GO:0009311	oligosaccharide metabolic process	2/183	47/15278	0.108788	0.420879	0.378047	GLA/ST6GALNAC5	2
GO:0035176	social behavior	2/183	47/15278	0.108788	0.420879	0.378047	NRXN2/DLG4	2
GO:0042551	neuron maturation	2/183	47/15278	0.108788	0.420879	0.378047	RET/C1QA	2
GO:0043038	amino acid activation	2/183	47/15278	0.108788	0.420879	0.378047	TARS1/LARS2	2
GO:0046460	neutral lipid biosynthetic process	2/183	47/15278	0.108788	0.420879	0.378047	SIK1/MFSD2A	2
GO:0046463	acylglycerol biosynthetic process	2/183	47/15278	0.108788	0.420879	0.378047	SIK1/MFSD2A	2
GO:0051339	regulation of lyase activity	2/183	47/15278	0.108788	0.420879	0.378047	GABBR2/CRHR1	2
GO:0051932	synaptic transmission, GABAergic	2/183	47/15278	0.108788	0.420879	0.378047	SYN3/ADRA1A	2
GO:0061001	regulation of dendritic spine morphogenesis	2/183	47/15278	0.108788	0.420879	0.378047	LRP8/ARC	2
GO:0070741	response to interleukin-6	2/183	47/15278	0.108788	0.420879	0.378047	CITED1/PTPRT	2
GO:1990928	response to amino acid starvation	2/183	47/15278	0.108788	0.420879	0.378047	SLC38A2/ATF4	2
GO:0001649	osteoblast differentiation	5/183	211/15278	0.109896	0.420879	0.378047	SPP1/CITED1/IGFBP5/ATF4/COL1A1	5
GO:0045665	negative regulation of neuron differentiation	5/183	211/15278	0.109896	0.420879	0.378047	SPP1/SEMA5A/B2M/LGALS1/RAP1GAP2	5
GO:0009141	nucleoside triphosphate metabolic process	3/183	97/15278	0.110705	0.420879	0.378047	NME1/SAMHD1/UCK2	3
GO:0043279	response to alkaloid	3/183	97/15278	0.110705	0.420879	0.378047	RYR2/PRKCG/ADCY8	3
GO:0001764	neuron migration	4/183	153/15278	0.111874	0.420879	0.378047	CCKAR/CAMK2A/COL3A1/MDGA1	4
GO:0048146	positive regulation of fibroblast proliferation	2/183	48/15278	0.112661	0.420879	0.378047	ANXA2/AGT	2
GO:2001238	positive regulation of extrinsic apoptotic signaling pathway	2/183	48/15278	0.112661	0.420879	0.378047	RET/AGT	2
GO:0001823	mesonephros development	3/183	98/15278	0.113249	0.420879	0.378047	CITED1/RET/AGT	3
GO:0034404	nucleobase-containing small molecule biosynthetic process	3/183	98/15278	0.113249	0.420879	0.378047	NME1/SAMHD1/UCK2	3
GO:1901890	positive regulation of cell junction assembly	3/183	98/15278	0.113249	0.420879	0.378047	AGT/LRRC4B/LRTM2	3
GO:1903522	regulation of blood circulation	6/183	275/15278	0.113288	0.420879	0.378047	ADRA1B/CHRM2/AGT/RYR2/THRA/ADRA1A	6
GO:0031589	cell-substrate adhesion	7/183	339/15278	0.113468	0.420879	0.378047	COL3A1/CDH13/CD63/LGALS1/P4HB/COL1A1/LAMB3	7
GO:0001553	luteinization	1/183	10/15278	0.113557	0.420879	0.378047	PTPRN	1
GO:0002291	T cell activation via T cell receptor contact with antigen bound to MHC molecule on antigen presenting cell	1/183	10/15278	0.113557	0.420879	0.378047	FGL2	1
GO:0002468	dendritic cell antigen processing and presentation	1/183	10/15278	0.113557	0.420879	0.378047	FGL2	1
GO:0002475	antigen processing and presentation via MHC class Ib	1/183	10/15278	0.113557	0.420879	0.378047	B2M	1
GO:0002483	antigen processing and presentation of endogenous peptide antigen	1/183	10/15278	0.113557	0.420879	0.378047	B2M	1
GO:0002604	regulation of dendritic cell antigen processing and presentation	1/183	10/15278	0.113557	0.420879	0.378047	FGL2	1
GO:0003084	positive regulation of systemic arterial blood pressure	1/183	10/15278	0.113557	0.420879	0.378047	ADRA1A	1
GO:0006171	cAMP biosynthetic process	1/183	10/15278	0.113557	0.420879	0.378047	ADCY8	1
GO:0006222	UMP biosynthetic process	1/183	10/15278	0.113557	0.420879	0.378047	UCK2	1
GO:0006569	tryptophan catabolic process	1/183	10/15278	0.113557	0.420879	0.378047	AFMID	1
GO:0007512	adult heart development	1/183	10/15278	0.113557	0.420879	0.378047	ADRA1A	1
GO:0008655	pyrimidine-containing compound salvage	1/183	10/15278	0.113557	0.420879	0.378047	UCK2	1
GO:0009173	pyrimidine ribonucleoside monophosphate metabolic process	1/183	10/15278	0.113557	0.420879	0.378047	UCK2	1
GO:0009174	pyrimidine ribonucleoside monophosphate biosynthetic process	1/183	10/15278	0.113557	0.420879	0.378047	UCK2	1
GO:0010459	negative regulation of heart rate	1/183	10/15278	0.113557	0.420879	0.378047	ADRA1A	1
GO:0010998	regulation of translational initiation by eIF2 alpha phosphorylation	1/183	10/15278	0.113557	0.420879	0.378047	PPP1R15B	1
GO:0014041	regulation of neuron maturation	1/183	10/15278	0.113557	0.420879	0.378047	RET	1
GO:0015697	quaternary ammonium group transport	1/183	10/15278	0.113557	0.420879	0.378047	SLC38A2	1
GO:0015808	L-alanine transport	1/183	10/15278	0.113557	0.420879	0.378047	SLC3A2	1
GO:0016081	synaptic vesicle docking	1/183	10/15278	0.113557	0.420879	0.378047	UNC13A	1
GO:0019755	one-carbon compound transport	1/183	10/15278	0.113557	0.420879	0.378047	SLC14A1	1
GO:0019885	antigen processing and presentation of endogenous peptide antigen via MHC class I	1/183	10/15278	0.113557	0.420879	0.378047	B2M	1
GO:0021559	trigeminal nerve development	1/183	10/15278	0.113557	0.420879	0.378047	PLXNA4	1
GO:0021561	facial nerve development	1/183	10/15278	0.113557	0.420879	0.378047	PLXNA4	1
GO:0021604	cranial nerve structural organization	1/183	10/15278	0.113557	0.420879	0.378047	PLXNA4	1
GO:0021610	facial nerve morphogenesis	1/183	10/15278	0.113557	0.420879	0.378047	PLXNA4	1
GO:0030202	heparin metabolic process	1/183	10/15278	0.113557	0.420879	0.378047	GLCE	1
GO:0030259	lipid glycosylation	1/183	10/15278	0.113557	0.420879	0.378047	GBA	1
GO:0030388	fructose 1,6-bisphosphate metabolic process	1/183	10/15278	0.113557	0.420879	0.378047	ALDOC	1
GO:0031630	regulation of synaptic vesicle fusion to presynaptic active zone membrane	1/183	10/15278	0.113557	0.420879	0.378047	SYT9	1
GO:0032377	regulation of intracellular lipid transport	1/183	10/15278	0.113557	0.420879	0.378047	ANXA2	1
GO:0032380	regulation of intracellular sterol transport	1/183	10/15278	0.113557	0.420879	0.378047	ANXA2	1
GO:0032383	regulation of intracellular cholesterol transport	1/183	10/15278	0.113557	0.420879	0.378047	ANXA2	1
GO:0033197	response to vitamin E	1/183	10/15278	0.113557	0.420879	0.378047	COL1A1	1
GO:0035860	glial cell-derived neurotrophic factor receptor signaling pathway	1/183	10/15278	0.113557	0.420879	0.378047	RET	1
GO:0035933	glucocorticoid secretion	1/183	10/15278	0.113557	0.420879	0.378047	CRHR1	1
GO:0036490	regulation of translation in response to endoplasmic reticulum stress	1/183	10/15278	0.113557	0.420879	0.378047	PPP1R15B	1
GO:0042436	indole-containing compound catabolic process	1/183	10/15278	0.113557	0.420879	0.378047	AFMID	1
GO:0042447	hormone catabolic process	1/183	10/15278	0.113557	0.420879	0.378047	SPP1	1
GO:0042789	mRNA transcription by RNA polymerase II	1/183	10/15278	0.113557	0.420879	0.378047	ATF4	1
GO:0043097	pyrimidine nucleoside salvage	1/183	10/15278	0.113557	0.420879	0.378047	UCK2	1
GO:0043380	regulation of memory T cell differentiation	1/183	10/15278	0.113557	0.420879	0.378047	FGL2	1
GO:0046049	UMP metabolic process	1/183	10/15278	0.113557	0.420879	0.378047	UCK2	1
GO:0046218	indolalkylamine catabolic process	1/183	10/15278	0.113557	0.420879	0.378047	AFMID	1
GO:0060346	bone trabecula formation	1/183	10/15278	0.113557	0.420879	0.378047	COL1A1	1
GO:0070213	protein auto-ADP-ribosylation	1/183	10/15278	0.113557	0.420879	0.378047	PARP8	1
GO:0071104	response to interleukin-9	1/183	10/15278	0.113557	0.420879	0.378047	CITED1	1
GO:0071394	cellular response to testosterone stimulus	1/183	10/15278	0.113557	0.420879	0.378047	SPP1	1
GO:0071888	macrophage apoptotic process	1/183	10/15278	0.113557	0.420879	0.378047	SELENOS	1
GO:0086016	AV node cell action potential	1/183	10/15278	0.113557	0.420879	0.378047	RYR2	1
GO:0086027	AV node cell to bundle of His cell signaling	1/183	10/15278	0.113557	0.420879	0.378047	RYR2	1
GO:0086070	SA node cell to atrial cardiac muscle cell communication	1/183	10/15278	0.113557	0.420879	0.378047	RYR2	1
GO:0090084	negative regulation of inclusion body assembly	1/183	10/15278	0.113557	0.420879	0.378047	HSPA1B	1
GO:0090649	response to oxygen-glucose deprivation	1/183	10/15278	0.113557	0.420879	0.378047	ATF4	1
GO:0097050	type B pancreatic cell apoptotic process	1/183	10/15278	0.113557	0.420879	0.378047	RYR2	1
GO:0097104	postsynaptic membrane assembly	1/183	10/15278	0.113557	0.420879	0.378047	NRXN2	1
GO:0098722	asymmetric stem cell division	1/183	10/15278	0.113557	0.420879	0.378047	ETV5	1
GO:1902023	L-arginine transport	1/183	10/15278	0.113557	0.420879	0.378047	AGT	1
GO:1902287	semaphorin-plexin signaling pathway involved in axon guidance	1/183	10/15278	0.113557	0.420879	0.378047	PLXNA4	1
GO:1903431	positive regulation of cell maturation	1/183	10/15278	0.113557	0.420879	0.378047	RET	1
GO:1903897	regulation of PERK-mediated unfolded protein response	1/183	10/15278	0.113557	0.420879	0.378047	PPP1R15B	1
GO:1905245	regulation of aspartic-type peptidase activity	1/183	10/15278	0.113557	0.420879	0.378047	EFNA3	1
GO:1905461	positive regulation of vascular associated smooth muscle cell apoptotic process	1/183	10/15278	0.113557	0.420879	0.378047	ATF4	1
GO:2000644	regulation of receptor catabolic process	1/183	10/15278	0.113557	0.420879	0.378047	ANXA2	1
GO:2001241	positive regulation of extrinsic apoptotic signaling pathway in absence of ligand	1/183	10/15278	0.113557	0.420879	0.378047	RET	1
GO:0043433	negative regulation of DNA-binding transcription factor activity	4/183	154/15278	0.113847	0.420879	0.378047	SIK1/SFRP4/HEYL/NWD1	4
GO:0009636	response to toxic substance	5/183	214/15278	0.114815	0.420879	0.378047	SLC7A11/FOS/ASS1/ATF4/SELENOS	5
GO:0006721	terpenoid metabolic process	3/183	99/15278	0.115815	0.420879	0.378047	LRP8/SCPEP1/CYP4V2	3
GO:0055002	striated muscle cell development	4/183	155/15278	0.115834	0.420879	0.378047	AGT/PGM5/FHOD3/ADRA1A	4
GO:0070997	neuron death	7/183	341/15278	0.116042	0.420879	0.378047	SLC7A11/CITED1/FOS/PRKCG/C1QA/ATF4/GBA	7
GO:0051259	protein complex oligomerization	5/183	215/15278	0.116478	0.420879	0.378047	B2M/RNF112/SAMHD1/ADCY8/ARC	5
GO:0015872	dopamine transport	2/183	49/15278	0.116569	0.420879	0.378047	SYT9/SYT4	2
GO:0042987	amyloid precursor protein catabolic process	2/183	49/15278	0.116569	0.420879	0.378047	EFNA3/UNC13A	2
GO:0045912	negative regulation of carbohydrate metabolic process	2/183	49/15278	0.116569	0.420879	0.378047	SIK1/SELENOS	2
GO:0046473	phosphatidic acid metabolic process	2/183	49/15278	0.116569	0.420879	0.378047	DGKG/ABHD8	2
GO:0051703	intraspecies interaction between organisms	2/183	49/15278	0.116569	0.420879	0.378047	NRXN2/DLG4	2
GO:0071398	cellular response to fatty acid	2/183	49/15278	0.116569	0.420879	0.378047	ASS1/NME1	2
GO:0099172	presynapse organization	2/183	49/15278	0.116569	0.420879	0.378047	LRRC4B/MDGA1	2
GO:1903428	positive regulation of reactive oxygen species biosynthetic process	2/183	49/15278	0.116569	0.420879	0.378047	AGT/ASS1	2
GO:2000351	regulation of endothelial cell apoptotic process	2/183	49/15278	0.116569	0.420879	0.378047	SEMA5A/SCG2	2
GO:0098742	cell-cell adhesion via plasma-membrane adhesion molecules	5/183	216/15278	0.118153	0.420879	0.378047	RET/LRRC4B/CDH13/PTPRT/MDGA1	5
GO:0001938	positive regulation of endothelial cell proliferation	3/183	100/15278	0.118403	0.420879	0.378047	SEMA5A/SCG2/CDH13	3
GO:0032414	positive regulation of ion transmembrane transporter activity	3/183	100/15278	0.118403	0.420879	0.378047	RYR2/ARC/CTSS	3
GO:0071867	response to monoamine	3/183	100/15278	0.118403	0.420879	0.378047	CHRM2/RYR2/ATF4	3
GO:0071869	response to catecholamine	3/183	100/15278	0.118403	0.420879	0.378047	CHRM2/RYR2/ATF4	3
GO:0008544	epidermis development	7/183	343/15278	0.118647	0.420879	0.378047	IGFBP5/SFRP4/KLK7/KRT78/ACVR1B/LAMB3/LAMC2	7
GO:0003179	heart valve morphogenesis	2/183	50/15278	0.120512	0.420879	0.378047	HEYL/ELN	2
GO:0007528	neuromuscular junction development	2/183	50/15278	0.120512	0.420879	0.378047	ETV5/UNC13A	2
GO:0043949	regulation of cAMP-mediated signaling	2/183	50/15278	0.120512	0.420879	0.378047	ADCYAP1R1/OPRL1	2
GO:0044273	sulfur compound catabolic process	2/183	50/15278	0.120512	0.420879	0.378047	CHAC1/ACAN	2
GO:0071320	cellular response to cAMP	2/183	50/15278	0.120512	0.420879	0.378047	IGFBP5/ASS1	2
GO:0021761	limbic system development	3/183	101/15278	0.121013	0.420879	0.378047	MFSD2A/LRP8/NME1	3
GO:0051963	regulation of synapse assembly	3/183	101/15278	0.121013	0.420879	0.378047	LRRC4B/MDGA1/LRTM2	3
GO:0072009	nephron epithelium development	3/183	101/15278	0.121013	0.420879	0.378047	CITED1/AGT/HEYL	3
GO:0090100	positive regulation of transmembrane receptor protein serine/threonine kinase signaling pathway	3/183	101/15278	0.121013	0.420879	0.378047	CITED1/CITED2/ACVR1B	3
GO:0090174	organelle membrane fusion	3/183	102/15278	0.123643	0.420879	0.378047	ANXA2/SYT9/SYT4	3
GO:0000050	urea cycle	1/183	11/15278	0.124182	0.420879	0.378047	ASS1	1
GO:0001765	membrane raft assembly	1/183	11/15278	0.124182	0.420879	0.378047	ANXA2	1
GO:0002674	negative regulation of acute inflammatory response	1/183	11/15278	0.124182	0.420879	0.378047	SELENOS	1
GO:0002862	negative regulation of inflammatory response to antigenic stimulus	1/183	11/15278	0.124182	0.420879	0.378047	SELENOS	1
GO:0006534	cysteine metabolic process	1/183	11/15278	0.124182	0.420879	0.378047	SLC7A11	1
GO:0006558	L-phenylalanine metabolic process	1/183	11/15278	0.124182	0.420879	0.378047	ASRGL1	1
GO:0006559	L-phenylalanine catabolic process	1/183	11/15278	0.124182	0.420879	0.378047	ASRGL1	1
GO:0006857	oligopeptide transport	1/183	11/15278	0.124182	0.420879	0.378047	SLC7A11	1
GO:0009629	response to gravity	1/183	11/15278	0.124182	0.420879	0.378047	FOS	1
GO:0014745	negative regulation of muscle adaptation	1/183	11/15278	0.124182	0.420879	0.378047	IGFBP5	1
GO:0014820	tonic smooth muscle contraction	1/183	11/15278	0.124182	0.420879	0.378047	AGT	1
GO:0016264	gap junction assembly	1/183	11/15278	0.124182	0.420879	0.378047	AGT	1
GO:0018401	peptidyl-proline hydroxylation to 4-hydroxy-L-proline	1/183	11/15278	0.124182	0.420879	0.378047	P4HB	1
GO:0032253	dense core granule localization	1/183	11/15278	0.124182	0.420879	0.378047	SYT4	1
GO:0033139	regulation of peptidyl-serine phosphorylation of STAT protein	1/183	11/15278	0.124182	0.420879	0.378047	RET	1
GO:0033860	regulation of NAD(P)H oxidase activity	1/183	11/15278	0.124182	0.420879	0.378047	AGT	1
GO:0035092	sperm chromatin condensation	1/183	11/15278	0.124182	0.420879	0.378047	CHD5	1
GO:0035845	photoreceptor cell outer segment organization	1/183	11/15278	0.124182	0.420879	0.378047	MFSD2A	1
GO:0038063	collagen-activated tyrosine kinase receptor signaling pathway	1/183	11/15278	0.124182	0.420879	0.378047	COL1A1	1
GO:0043379	memory T cell differentiation	1/183	11/15278	0.124182	0.420879	0.378047	FGL2	1
GO:0043455	regulation of secondary metabolic process	1/183	11/15278	0.124182	0.420879	0.378047	SLC7A11	1
GO:0043476	pigment accumulation	1/183	11/15278	0.124182	0.420879	0.378047	CD63	1
GO:0043482	cellular pigment accumulation	1/183	11/15278	0.124182	0.420879	0.378047	CD63	1
GO:0043619	regulation of transcription from RNA polymerase II promoter in response to oxidative stress	1/183	11/15278	0.124182	0.420879	0.378047	ATF4	1
GO:0046322	negative regulation of fatty acid oxidation	1/183	11/15278	0.124182	0.420879	0.378047	MFSD2A	1
GO:0046929	negative regulation of neurotransmitter secretion	1/183	11/15278	0.124182	0.420879	0.378047	SYT4	1
GO:0048021	regulation of melanin biosynthetic process	1/183	11/15278	0.124182	0.420879	0.378047	SLC7A11	1
GO:0060453	regulation of gastric acid secretion	1/183	11/15278	0.124182	0.420879	0.378047	OPRL1	1
GO:0061314	Notch signaling involved in heart development	1/183	11/15278	0.124182	0.420879	0.378047	HEYL	1
GO:0070189	kynurenine metabolic process	1/183	11/15278	0.124182	0.420879	0.378047	AFMID	1
GO:0070431	nucleotide-binding oligomerization domain containing 2 signaling pathway	1/183	11/15278	0.124182	0.420879	0.378047	HSPA1B	1
GO:0071281	cellular response to iron ion	1/183	11/15278	0.124182	0.420879	0.378047	B2M	1
GO:0071415	cellular response to purine-containing compound	1/183	11/15278	0.124182	0.420879	0.378047	RYR2	1
GO:0071803	positive regulation of podosome assembly	1/183	11/15278	0.124182	0.420879	0.378047	LCP1	1
GO:0086067	AV node cell to bundle of His cell communication	1/183	11/15278	0.124182	0.420879	0.378047	RYR2	1
GO:0090193	positive regulation of glomerulus development	1/183	11/15278	0.124182	0.420879	0.378047	RET	1
GO:0090715	immunological memory formation process	1/183	11/15278	0.124182	0.420879	0.378047	FGL2	1
GO:0097201	negative regulation of transcription from RNA polymerase II promoter in response to stress	1/183	11/15278	0.124182	0.420879	0.378047	CITED2	1
GO:0098917	retrograde trans-synaptic signaling	1/183	11/15278	0.124182	0.420879	0.378047	SYT4	1
GO:0099519	dense core granule cytoskeletal transport	1/183	11/15278	0.124182	0.420879	0.378047	SYT4	1
GO:0106070	regulation of adenylate cyclase-activating G protein-coupled receptor signaling pathway	1/183	11/15278	0.124182	0.420879	0.378047	OPRL1	1
GO:0106074	aminoacyl-tRNA metabolism involved in translational fidelity	1/183	11/15278	0.124182	0.420879	0.378047	LARS2	1
GO:0150104	transport across blood-brain barrier	1/183	11/15278	0.124182	0.420879	0.378047	MFSD2A	1
GO:1900376	regulation of secondary metabolite biosynthetic process	1/183	11/15278	0.124182	0.420879	0.378047	SLC7A11	1
GO:1901070	guanosine-containing compound biosynthetic process	1/183	11/15278	0.124182	0.420879	0.378047	NME1	1
GO:1901950	dense core granule transport	1/183	11/15278	0.124182	0.420879	0.378047	SYT4	1
GO:1902221	erythrose 4-phosphate/phosphoenolpyruvate family amino acid metabolic process	1/183	11/15278	0.124182	0.420879	0.378047	ASRGL1	1
GO:1902222	erythrose 4-phosphate/phosphoenolpyruvate family amino acid catabolic process	1/183	11/15278	0.124182	0.420879	0.378047	ASRGL1	1
GO:1902260	negative regulation of delayed rectifier potassium channel activity	1/183	11/15278	0.124182	0.420879	0.378047	KCNAB1	1
GO:1902285	semaphorin-plexin signaling pathway involved in neuron projection guidance	1/183	11/15278	0.124182	0.420879	0.378047	PLXNA4	1
GO:1903025	regulation of RNA polymerase II regulatory region sequence-specific DNA binding	1/183	11/15278	0.124182	0.420879	0.378047	ZNF593	1
GO:1903909	regulation of receptor clustering	1/183	11/15278	0.124182	0.420879	0.378047	SLC7A11	1
GO:1904321	response to forskolin	1/183	11/15278	0.124182	0.420879	0.378047	ADCY8	1
GO:1904322	cellular response to forskolin	1/183	11/15278	0.124182	0.420879	0.378047	ADCY8	1
GO:1904350	regulation of protein catabolic process in the vacuole	1/183	11/15278	0.124182	0.420879	0.378047	GBA	1
GO:1990440	positive regulation of transcription from RNA polymerase II promoter in response to endoplasmic reticulum stress	1/183	11/15278	0.124182	0.420879	0.378047	ATF4	1
GO:2001223	negative regulation of neuron migration	1/183	11/15278	0.124182	0.420879	0.378047	COL3A1	1
GO:0045824	negative regulation of innate immune response	2/183	51/15278	0.124487	0.420945	0.378106	VSIG4/SAMHD1	2
GO:0050819	negative regulation of coagulation	2/183	51/15278	0.124487	0.420945	0.378106	ANXA5/ANXA2	2
GO:0002250	adaptive immune response	8/183	415/15278	0.126171	0.424761	0.381534	CFI/B2M/FGL2/C1QA/C1QC/C1QB/HLA-DQB1/CTSS	8
GO:0006939	smooth muscle contraction	3/183	103/15278	0.126295	0.424761	0.381534	CHRM2/AGT/ADRA1A	3
GO:0032963	collagen metabolic process	3/183	103/15278	0.126295	0.424761	0.381534	COL1A1/CTSS/ADAMTS2	3
GO:0006937	regulation of muscle contraction	4/183	161/15278	0.128076	0.424761	0.381534	ADRA1B/CHRM2/RYR2/ADRA1A	4
GO:0051851	modulation by host of symbiont process	2/183	52/15278	0.128493	0.424761	0.381534	PPIB/ANXA2	2
GO:1900408	negative regulation of cellular response to oxidative stress	2/183	52/15278	0.128493	0.424761	0.381534	SLC7A11/ATF4	2
GO:1903202	negative regulation of oxidative stress-induced cell death	2/183	52/15278	0.128493	0.424761	0.381534	SLC7A11/ATF4	2
GO:0021987	cerebral cortex development	3/183	104/15278	0.128967	0.424761	0.381534	COL3A1/LRP8/SLC38A2	3
GO:0048524	positive regulation of viral process	3/183	104/15278	0.128967	0.424761	0.381534	PPIB/LGALS1/P4HB	3
GO:0001501	skeletal system development	9/183	485/15278	0.128994	0.424761	0.381534	PPIB/ANXA2/COL3A1/SFRP4/COL1A1/THRA/VKORC1/ACAN/TLE5	9
GO:0001935	endothelial cell proliferation	4/183	162/15278	0.130168	0.424761	0.381534	SEMA5A/SCG2/CDH13/ERN1	4
GO:0071560	cellular response to transforming growth factor beta stimulus	5/183	223/15278	0.13019	0.424761	0.381534	CITED1/FOS/COL3A1/CITED2/COL1A1	5
GO:0043500	muscle adaptation	3/183	105/15278	0.131659	0.424761	0.381534	IGFBP5/AGT/ADRA1A	3
GO:0015698	inorganic anion transport	4/183	163/15278	0.132273	0.424761	0.381534	SFRP4/SLC4A8/ATF4/SLC20A1	4
GO:0001755	neural crest cell migration	2/183	53/15278	0.132529	0.424761	0.381534	SEMA5A/RET	2
GO:0007566	embryo implantation	2/183	53/15278	0.132529	0.424761	0.381534	SPP1/ACVR1B	2
GO:0046686	response to cadmium ion	2/183	53/15278	0.132529	0.424761	0.381534	B2M/FOS	2
GO:0051289	protein homotetramerization	2/183	53/15278	0.132529	0.424761	0.381534	B2M/SAMHD1	2
GO:0032411	positive regulation of transporter activity	3/183	106/15278	0.13437	0.424761	0.381534	RYR2/ARC/CTSS	3
GO:0043409	negative regulation of MAPK cascade	4/183	164/15278	0.134393	0.424761	0.381534	DUSP9/AGT/C1QL4/GBA	4
GO:0001574	ganglioside biosynthetic process	1/183	12/15278	0.13468	0.424761	0.381534	ST6GALNAC5	1
GO:0002921	negative regulation of humoral immune response	1/183	12/15278	0.13468	0.424761	0.381534	VSIG4	1
GO:0006568	tryptophan metabolic process	1/183	12/15278	0.13468	0.424761	0.381534	AFMID	1
GO:0009143	nucleoside triphosphate catabolic process	1/183	12/15278	0.13468	0.424761	0.381534	SAMHD1	1
GO:0009151	purine deoxyribonucleotide metabolic process	1/183	12/15278	0.13468	0.424761	0.381534	SAMHD1	1
GO:0010232	vascular transport	1/183	12/15278	0.13468	0.424761	0.381534	MFSD2A	1
GO:0010872	regulation of cholesterol esterification	1/183	12/15278	0.13468	0.424761	0.381534	AGT	1
GO:0015803	branched-chain amino acid transport	1/183	12/15278	0.13468	0.424761	0.381534	SLC3A2	1
GO:0015809	arginine transport	1/183	12/15278	0.13468	0.424761	0.381534	AGT	1
GO:0016446	somatic hypermutation of immunoglobulin genes	1/183	12/15278	0.13468	0.424761	0.381534	SAMHD1	1
GO:0019627	urea metabolic process	1/183	12/15278	0.13468	0.424761	0.381534	ASS1	1
GO:0030836	positive regulation of actin filament depolymerization	1/183	12/15278	0.13468	0.424761	0.381534	SEMA5A	1
GO:0031223	auditory behavior	1/183	12/15278	0.13468	0.424761	0.381534	NRXN2	1
GO:0032096	negative regulation of response to food	1/183	12/15278	0.13468	0.424761	0.381534	NUCB2	1
GO:0032099	negative regulation of appetite	1/183	12/15278	0.13468	0.424761	0.381534	NUCB2	1
GO:0032230	positive regulation of synaptic transmission, GABAergic	1/183	12/15278	0.13468	0.424761	0.381534	ADRA1A	1
GO:0035641	locomotory exploration behavior	1/183	12/15278	0.13468	0.424761	0.381534	DLG4	1
GO:0035815	positive regulation of renal sodium excretion	1/183	12/15278	0.13468	0.424761	0.381534	AGT	1
GO:0042340	keratan sulfate catabolic process	1/183	12/15278	0.13468	0.424761	0.381534	ACAN	1
GO:0043568	positive regulation of insulin-like growth factor receptor signaling pathway	1/183	12/15278	0.13468	0.424761	0.381534	IGFBP5	1
GO:0044090	positive regulation of vacuole organization	1/183	12/15278	0.13468	0.424761	0.381534	ANXA2	1
GO:0048245	eosinophil chemotaxis	1/183	12/15278	0.13468	0.424761	0.381534	SCG2	1
GO:0048484	enteric nervous system development	1/183	12/15278	0.13468	0.424761	0.381534	RET	1
GO:0055062	phosphate ion homeostasis	1/183	12/15278	0.13468	0.424761	0.381534	SFRP4	1
GO:0060856	establishment of blood-brain barrier	1/183	12/15278	0.13468	0.424761	0.381534	MFSD2A	1
GO:0061450	trophoblast cell migration	1/183	12/15278	0.13468	0.424761	0.381534	ACVR1B	1
GO:0061469	regulation of type B pancreatic cell proliferation	1/183	12/15278	0.13468	0.424761	0.381534	PTPRN	1
GO:0070278	extracellular matrix constituent secretion	1/183	12/15278	0.13468	0.424761	0.381534	AGT	1
GO:0071107	response to parathyroid hormone	1/183	12/15278	0.13468	0.424761	0.381534	CITED1	1
GO:0071287	cellular response to manganese ion	1/183	12/15278	0.13468	0.424761	0.381534	ATF4	1
GO:0071340	skeletal muscle acetylcholine-gated channel clustering	1/183	12/15278	0.13468	0.424761	0.381534	ETV5	1
GO:0071712	ER-associated misfolded protein catabolic process	1/183	12/15278	0.13468	0.424761	0.381534	SDF2L1	1
GO:0071941	nitrogen cycle metabolic process	1/183	12/15278	0.13468	0.424761	0.381534	ASS1	1
GO:0072505	divalent inorganic anion homeostasis	1/183	12/15278	0.13468	0.424761	0.381534	SFRP4	1
GO:0072506	trivalent inorganic anion homeostasis	1/183	12/15278	0.13468	0.424761	0.381534	SFRP4	1
GO:0090713	immunological memory process	1/183	12/15278	0.13468	0.424761	0.381534	FGL2	1
GO:0098787	mRNA cleavage involved in mRNA processing	1/183	12/15278	0.13468	0.424761	0.381534	ERN1	1
GO:0099149	regulation of postsynaptic neurotransmitter receptor internalization	1/183	12/15278	0.13468	0.424761	0.381534	ARC	1
GO:0099151	regulation of postsynaptic density assembly	1/183	12/15278	0.13468	0.424761	0.381534	LRRC4B	1
GO:1901163	regulation of trophoblast cell migration	1/183	12/15278	0.13468	0.424761	0.381534	ACVR1B	1
GO:1903961	positive regulation of anion transmembrane transport	1/183	12/15278	0.13468	0.424761	0.381534	AGT	1
GO:1990403	embryonic brain development	1/183	12/15278	0.13468	0.424761	0.381534	RNF112	1
GO:2000774	positive regulation of cellular senescence	1/183	12/15278	0.13468	0.424761	0.381534	B2M	1
GO:0046148	pigment biosynthetic process	2/183	54/15278	0.136594	0.428626	0.385005	SLC7A11/CITED1	2
GO:0051926	negative regulation of calcium ion transport	2/183	54/15278	0.136594	0.428626	0.385005	CRHR1/OPRL1	2
GO:0060688	regulation of morphogenesis of a branching structure	2/183	54/15278	0.136594	0.428626	0.385005	ETV5/AGT	2
GO:1902883	negative regulation of response to oxidative stress	2/183	54/15278	0.136594	0.428626	0.385005	SLC7A11/ATF4	2
GO:0009895	negative regulation of catabolic process	6/183	291/15278	0.13735	0.428626	0.385005	ANXA2/TENT5A/PRKCG/MFSD2A/CTSA/ADRA1A	6
GO:0035725	sodium ion transmembrane transport	4/183	166/15278	0.138674	0.428626	0.385005	SLC3A2/SLC4A8/SLC24A3/SLC20A1	4
GO:0044272	sulfur compound biosynthetic process	4/183	166/15278	0.138674	0.428626	0.385005	SLC7A11/CHAC1/ACAN/GLCE	4
GO:0032535	regulation of cellular component size	7/183	358/15278	0.139137	0.428626	0.385005	SPP1/SEMA5A/PLXNA4/RET/RAP1GAP2/ELN/FHOD3	7
GO:0061387	regulation of extent of cell growth	3/183	108/15278	0.139851	0.428626	0.385005	SPP1/SEMA5A/PLXNA4	3
GO:0006576	cellular biogenic amine metabolic process	2/183	55/15278	0.140687	0.428626	0.385005	SAT1/AFMID	2
GO:0035306	positive regulation of dephosphorylation	2/183	55/15278	0.140687	0.428626	0.385005	PPP1R15B/GBA	2
GO:0072577	endothelial cell apoptotic process	2/183	55/15278	0.140687	0.428626	0.385005	SEMA5A/SCG2	2
GO:0061564	axon development	9/183	495/15278	0.140792	0.428626	0.385005	SPP1/CCKAR/SEMA5A/PLXNA4/RET/RAP1GAP/EFNA3/LAMC2/LRTM2	9
GO:0071559	response to transforming growth factor beta	5/183	229/15278	0.140935	0.428626	0.385005	CITED1/FOS/COL3A1/CITED2/COL1A1	5
GO:0030004	cellular monovalent inorganic cation homeostasis	3/183	109/15278	0.14262	0.428626	0.385005	AGT/ATP6V0B/SLC4A8	3
GO:1903409	reactive oxygen species biosynthetic process	3/183	109/15278	0.14262	0.428626	0.385005	GLA/AGT/ASS1	3
GO:0046777	protein autophosphorylation	5/183	230/15278	0.142762	0.428626	0.385005	SIK1/CAMK2A/PRKCG/ACVR1B/ERN1	5
GO:0055001	muscle cell development	4/183	168/15278	0.14301	0.428626	0.385005	AGT/PGM5/FHOD3/ADRA1A	4
GO:0001658	branching involved in ureteric bud morphogenesis	2/183	56/15278	0.144806	0.428626	0.385005	CITED1/AGT	2
GO:0002091	negative regulation of receptor internalization	1/183	13/15278	0.145053	0.428626	0.385005	DLG4	1
GO:0002566	somatic diversification of immune receptors via somatic mutation	1/183	13/15278	0.145053	0.428626	0.385005	SAMHD1	1
GO:0002864	regulation of acute inflammatory response to antigenic stimulus	1/183	13/15278	0.145053	0.428626	0.385005	SELENOS	1
GO:0003337	mesenchymal to epithelial transition involved in metanephros morphogenesis	1/183	13/15278	0.145053	0.428626	0.385005	CITED1	1
GO:0005513	detection of calcium ion	1/183	13/15278	0.145053	0.428626	0.385005	RYR2	1
GO:0006004	fucose metabolic process	1/183	13/15278	0.145053	0.428626	0.385005	FUCA1	1
GO:0006596	polyamine biosynthetic process	1/183	13/15278	0.145053	0.428626	0.385005	SAT1	1
GO:0006957	complement activation, alternative pathway	1/183	13/15278	0.145053	0.428626	0.385005	VSIG4	1
GO:0010958	regulation of amino acid import across plasma membrane	1/183	13/15278	0.145053	0.428626	0.385005	AGT	1
GO:0010988	regulation of low-density lipoprotein particle clearance	1/183	13/15278	0.145053	0.428626	0.385005	ANXA2	1
GO:0014061	regulation of norepinephrine secretion	1/183	13/15278	0.145053	0.428626	0.385005	AGT	1
GO:0014733	regulation of skeletal muscle adaptation	1/183	13/15278	0.145053	0.428626	0.385005	IGFBP5	1
GO:0015801	aromatic amino acid transport	1/183	13/15278	0.145053	0.428626	0.385005	SLC3A2	1
GO:0016322	neuron remodeling	1/183	13/15278	0.145053	0.428626	0.385005	C1QA	1
GO:0021527	spinal cord association neuron differentiation	1/183	13/15278	0.145053	0.428626	0.385005	MDGA1	1
GO:0032530	regulation of microvillus organization	1/183	13/15278	0.145053	0.428626	0.385005	RAP1GAP	1
GO:0033169	histone H3-K9 demethylation	1/183	13/15278	0.145053	0.428626	0.385005	HR	1
GO:0033604	negative regulation of catecholamine secretion	1/183	13/15278	0.145053	0.428626	0.385005	SYT4	1
GO:0034616	response to laminar fluid shear stress	1/183	13/15278	0.145053	0.428626	0.385005	ASS1	1
GO:0035810	positive regulation of urine volume	1/183	13/15278	0.145053	0.428626	0.385005	OPRL1	1
GO:0035864	response to potassium ion	1/183	13/15278	0.145053	0.428626	0.385005	DLG4	1
GO:0042308	negative regulation of protein import into nucleus	1/183	13/15278	0.145053	0.428626	0.385005	CABP1	1
GO:0042976	activation of Janus kinase activity	1/183	13/15278	0.145053	0.428626	0.385005	AGT	1
GO:0045475	locomotor rhythm	1/183	13/15278	0.145053	0.428626	0.385005	OPRL1	1
GO:0046512	sphingosine biosynthetic process	1/183	13/15278	0.145053	0.428626	0.385005	GBA	1
GO:0046520	sphingoid biosynthetic process	1/183	13/15278	0.145053	0.428626	0.385005	GBA	1
GO:0050930	induction of positive chemotaxis	1/183	13/15278	0.145053	0.428626	0.385005	SCG2	1
GO:0051386	regulation of neurotrophin TRK receptor signaling pathway	1/183	13/15278	0.145053	0.428626	0.385005	AGT	1
GO:0060452	positive regulation of cardiac muscle contraction	1/183	13/15278	0.145053	0.428626	0.385005	ADRA1A	1
GO:0061430	bone trabecula morphogenesis	1/183	13/15278	0.145053	0.428626	0.385005	COL1A1	1
GO:0070669	response to interleukin-2	1/183	13/15278	0.145053	0.428626	0.385005	CITED1	1
GO:0070986	left/right axis specification	1/183	13/15278	0.145053	0.428626	0.385005	CITED2	1
GO:0071872	cellular response to epinephrine stimulus	1/183	13/15278	0.145053	0.428626	0.385005	RYR2	1
GO:0098712	L-glutamate import across plasma membrane	1/183	13/15278	0.145053	0.428626	0.385005	SLC7A11	1
GO:0099150	regulation of postsynaptic specialization assembly	1/183	13/15278	0.145053	0.428626	0.385005	LRRC4B	1
GO:0150052	regulation of postsynapse assembly	1/183	13/15278	0.145053	0.428626	0.385005	LRRC4B	1
GO:1900102	negative regulation of endoplasmic reticulum unfolded protein response	1/183	13/15278	0.145053	0.428626	0.385005	PPP1R15B	1
GO:1900103	positive regulation of endoplasmic reticulum unfolded protein response	1/183	13/15278	0.145053	0.428626	0.385005	ERN1	1
GO:1901626	regulation of postsynaptic membrane organization	1/183	13/15278	0.145053	0.428626	0.385005	SLC7A11	1
GO:1903789	regulation of amino acid transmembrane transport	1/183	13/15278	0.145053	0.428626	0.385005	AGT	1
GO:1903817	negative regulation of voltage-gated potassium channel activity	1/183	13/15278	0.145053	0.428626	0.385005	KCNAB1	1
GO:1904590	negative regulation of protein import	1/183	13/15278	0.145053	0.428626	0.385005	CABP1	1
GO:1904925	positive regulation of autophagy of mitochondrion in response to mitochondrial depolarization	1/183	13/15278	0.145053	0.428626	0.385005	GBA	1
GO:1990822	basic amino acid transmembrane transport	1/183	13/15278	0.145053	0.428626	0.385005	AGT	1
GO:0043200	response to amino acid	3/183	110/15278	0.145407	0.429241	0.385558	COL3A1/ASS1/COL1A1	3
GO:0007416	synapse assembly	4/183	170/15278	0.147399	0.432911	0.388855	LRRC4B/NRXN2/MDGA1/LRTM2	4
GO:0070482	response to oxygen levels	7/183	364/15278	0.147789	0.432911	0.388855	PAM/RYR2/CITED2/ATF4/P4HB/COL1A1/CRYAB	7
GO:0051928	positive regulation of calcium ion transport	3/183	111/15278	0.148212	0.432911	0.388855	CAMK2A/ADCYAP1R1/RYR2	3
GO:0002381	immunoglobulin production involved in immunoglobulin mediated immune response	2/183	57/15278	0.148949	0.432911	0.388855	FGL2/HLA-DQB1	2
GO:0007588	excretion	2/183	57/15278	0.148949	0.432911	0.388855	AGT/ADRA1A	2
GO:0030166	proteoglycan biosynthetic process	2/183	57/15278	0.148949	0.432911	0.388855	ACAN/GLCE	2
GO:0050994	regulation of lipid catabolic process	2/183	57/15278	0.148949	0.432911	0.388855	MFSD2A/THRA	2
GO:0097755	positive regulation of blood vessel diameter	2/183	57/15278	0.148949	0.432911	0.388855	AGT/SCPEP1	2
GO:0030324	lung development	4/183	171/15278	0.149613	0.432911	0.388855	SLC7A11/IGFBP5/THRA/ADAMTS2	4
GO:0002761	regulation of myeloid leukocyte differentiation	3/183	112/15278	0.151034	0.432911	0.388855	FOS/C1QC/NME1	3
GO:0034605	cellular response to heat	3/183	112/15278	0.151034	0.432911	0.388855	CAMK2A/HSPA1B/CRYAB	3
GO:0006027	glycosaminoglycan catabolic process	2/183	58/15278	0.153117	0.432911	0.388855	FUCA1/ACAN	2
GO:0032507	maintenance of protein location in cell	2/183	58/15278	0.153117	0.432911	0.388855	RANGAP1/KDELR2	2
GO:2000378	negative regulation of reactive oxygen species metabolic process	2/183	58/15278	0.153117	0.432911	0.388855	GLA/CRYAB	2
GO:0001921	positive regulation of receptor recycling	1/183	14/15278	0.155303	0.432911	0.388855	ANXA2	1
GO:0003214	cardiac left ventricle morphogenesis	1/183	14/15278	0.155303	0.432911	0.388855	RYR2	1
GO:0007567	parturition	1/183	14/15278	0.155303	0.432911	0.388855	CRHR1	1
GO:0007635	chemosensory behavior	1/183	14/15278	0.155303	0.432911	0.388855	PRKCG	1
GO:0007638	mechanosensory behavior	1/183	14/15278	0.155303	0.432911	0.388855	NRXN2	1
GO:0009130	pyrimidine nucleoside monophosphate biosynthetic process	1/183	14/15278	0.155303	0.432911	0.388855	UCK2	1
GO:0009404	toxin metabolic process	1/183	14/15278	0.155303	0.432911	0.388855	PAM	1
GO:0014048	regulation of glutamate secretion	1/183	14/15278	0.155303	0.432911	0.388855	SYT4	1
GO:0014874	response to stimulus involved in regulation of muscle adaptation	1/183	14/15278	0.155303	0.432911	0.388855	AGT	1
GO:0030852	regulation of granulocyte differentiation	1/183	14/15278	0.155303	0.432911	0.388855	C1QC	1
GO:0032105	negative regulation of response to extracellular stimulus	1/183	14/15278	0.155303	0.432911	0.388855	NUCB2	1
GO:0032108	negative regulation of response to nutrient levels	1/183	14/15278	0.155303	0.432911	0.388855	NUCB2	1
GO:0032802	low-density lipoprotein particle receptor catabolic process	1/183	14/15278	0.155303	0.432911	0.388855	ANXA2	1
GO:0034374	low-density lipoprotein particle remodeling	1/183	14/15278	0.155303	0.432911	0.388855	AGT	1
GO:0035358	regulation of peroxisome proliferator activated receptor signaling pathway	1/183	14/15278	0.155303	0.432911	0.388855	CITED2	1
GO:0035435	phosphate ion transmembrane transport	1/183	14/15278	0.155303	0.432911	0.388855	SLC20A1	1
GO:0035437	maintenance of protein localization in endoplasmic reticulum	1/183	14/15278	0.155303	0.432911	0.388855	KDELR2	1
GO:0038065	collagen-activated signaling pathway	1/183	14/15278	0.155303	0.432911	0.388855	COL1A1	1
GO:0038166	angiotensin-activated signaling pathway	1/183	14/15278	0.155303	0.432911	0.388855	CAMK2A	1
GO:0042762	regulation of sulfur metabolic process	1/183	14/15278	0.155303	0.432911	0.388855	SLC7A11	1
GO:0043173	nucleotide salvage	1/183	14/15278	0.155303	0.432911	0.388855	UCK2	1
GO:0044794	positive regulation by host of viral process	1/183	14/15278	0.155303	0.432911	0.388855	PPIB	1
GO:0044849	estrous cycle	1/183	14/15278	0.155303	0.432911	0.388855	OPRL1	1
GO:0045019	negative regulation of nitric oxide biosynthetic process	1/183	14/15278	0.155303	0.432911	0.388855	GLA	1
GO:0045898	regulation of RNA polymerase II transcription preinitiation complex assembly	1/183	14/15278	0.155303	0.432911	0.388855	THRA	1
GO:0046325	negative regulation of glucose import	1/183	14/15278	0.155303	0.432911	0.388855	SELENOS	1
GO:0048243	norepinephrine secretion	1/183	14/15278	0.155303	0.432911	0.388855	AGT	1
GO:0048368	lateral mesoderm development	1/183	14/15278	0.155303	0.432911	0.388855	CITED2	1
GO:0048681	negative regulation of axon regeneration	1/183	14/15278	0.155303	0.432911	0.388855	SPP1	1
GO:0050746	regulation of lipoprotein metabolic process	1/183	14/15278	0.155303	0.432911	0.388855	GBA	1
GO:0051284	positive regulation of sequestering of calcium ion	1/183	14/15278	0.155303	0.432911	0.388855	RYR2	1
GO:0051589	negative regulation of neurotransmitter transport	1/183	14/15278	0.155303	0.432911	0.388855	SYT4	1
GO:0051938	L-glutamate import	1/183	14/15278	0.155303	0.432911	0.388855	SLC7A11	1
GO:0060732	positive regulation of inositol phosphate biosynthetic process	1/183	14/15278	0.155303	0.432911	0.388855	ADCYAP1R1	1
GO:0061684	chaperone-mediated autophagy	1/183	14/15278	0.155303	0.432911	0.388855	CTSA	1
GO:0070307	lens fiber cell development	1/183	14/15278	0.155303	0.432911	0.388855	ATF4	1
GO:0072216	positive regulation of metanephros development	1/183	14/15278	0.155303	0.432911	0.388855	RET	1
GO:0072350	tricarboxylic acid metabolic process	1/183	14/15278	0.155303	0.432911	0.388855	ASS1	1
GO:0090192	regulation of glomerulus development	1/183	14/15278	0.155303	0.432911	0.388855	RET	1
GO:0099550	trans-synaptic signaling, modulating synaptic transmission	1/183	14/15278	0.155303	0.432911	0.388855	SYT4	1
GO:1901673	regulation of mitotic spindle assembly	1/183	14/15278	0.155303	0.432911	0.388855	HSPA1B	1
GO:1904406	negative regulation of nitric oxide metabolic process	1/183	14/15278	0.155303	0.432911	0.388855	GLA	1
GO:1904923	regulation of autophagy of mitochondrion in response to mitochondrial depolarization	1/183	14/15278	0.155303	0.432911	0.388855	GBA	1
GO:2001028	positive regulation of endothelial cell chemotaxis	1/183	14/15278	0.155303	0.432911	0.388855	SEMA5A	1
GO:2001044	regulation of integrin-mediated signaling pathway	1/183	14/15278	0.155303	0.432911	0.388855	CD63	1
GO:0050731	positive regulation of peptidyl-tyrosine phosphorylation	4/183	174/15278	0.156331	0.435368	0.391061	AGT/LRP8/DLG4/ADRA1A	4
GO:0003170	heart valve development	2/183	59/15278	0.157307	0.43726	0.392761	HEYL/ELN	2
GO:0009201	ribonucleoside triphosphate biosynthetic process	2/183	59/15278	0.157307	0.43726	0.392761	NME1/UCK2	2
GO:0030323	respiratory tube development	4/183	175/15278	0.158596	0.439641	0.3949	SLC7A11/IGFBP5/THRA/ADAMTS2	4
GO:0007613	memory	3/183	115/15278	0.159603	0.439641	0.3949	ADCY8/ARC/SYT4	3
GO:1903706	regulation of hemopoiesis	8/183	441/15278	0.160315	0.439641	0.3949	B2M/FOS/FGL2/LMO2/C1QC/ACVR1B/NME1/HSPA1B	8
GO:0007179	transforming growth factor beta receptor signaling pathway	4/183	176/15278	0.160872	0.439641	0.3949	CITED1/FOS/COL3A1/CITED2	4
GO:0006940	regulation of smooth muscle contraction	2/183	60/15278	0.161519	0.439641	0.3949	CHRM2/ADRA1A	2
GO:0010611	regulation of cardiac muscle hypertrophy	2/183	60/15278	0.161519	0.439641	0.3949	AGT/ADRA1A	2
GO:0010812	negative regulation of cell-substrate adhesion	2/183	60/15278	0.161519	0.439641	0.3949	LGALS1/COL1A1	2
GO:0032835	glomerulus development	2/183	60/15278	0.161519	0.439641	0.3949	RET/HEYL	2
GO:0032890	regulation of organic acid transport	2/183	60/15278	0.161519	0.439641	0.3949	AGT/SYT4	2
GO:0046173	polyol biosynthetic process	2/183	60/15278	0.161519	0.439641	0.3949	ADCYAP1R1/GBA	2
GO:0055081	anion homeostasis	2/183	60/15278	0.161519	0.439641	0.3949	SLC7A11/SFRP4	2
GO:1903038	negative regulation of leukocyte cell-cell adhesion	3/183	116/15278	0.162493	0.439641	0.3949	VSIG4/FGL2/ASS1	3
GO:0045667	regulation of osteoblast differentiation	3/183	117/15278	0.165397	0.439641	0.3949	CITED1/IGFBP5/ATF4	3
GO:0046718	viral entry into host cell	3/183	117/15278	0.165397	0.439641	0.3949	LGALS1/P4HB/HSPA1B	3
GO:0070972	protein localization to endoplasmic reticulum	3/183	117/15278	0.165397	0.439641	0.3949	SSR3/RYR2/KDELR2	3
GO:0006000	fructose metabolic process	1/183	15/15278	0.16543	0.439641	0.3949	ALDOC	1
GO:0006595	polyamine metabolic process	1/183	15/15278	0.16543	0.439641	0.3949	SAT1	1
GO:0007625	grooming behavior	1/183	15/15278	0.16543	0.439641	0.3949	DLG4	1
GO:0009129	pyrimidine nucleoside monophosphate metabolic process	1/183	15/15278	0.16543	0.439641	0.3949	UCK2	1
GO:0010867	positive regulation of triglyceride biosynthetic process	1/183	15/15278	0.16543	0.439641	0.3949	MFSD2A	1
GO:0031000	response to caffeine	1/183	15/15278	0.16543	0.439641	0.3949	RYR2	1
GO:0032252	secretory granule localization	1/183	15/15278	0.16543	0.439641	0.3949	SYT4	1
GO:0032769	negative regulation of monooxygenase activity	1/183	15/15278	0.16543	0.439641	0.3949	GLA	1
GO:0032930	positive regulation of superoxide anion generation	1/183	15/15278	0.16543	0.439641	0.3949	AGT	1
GO:0033033	negative regulation of myeloid cell apoptotic process	1/183	15/15278	0.16543	0.439641	0.3949	SELENOS	1
GO:0034433	steroid esterification	1/183	15/15278	0.16543	0.439641	0.3949	AGT	1
GO:0034434	sterol esterification	1/183	15/15278	0.16543	0.439641	0.3949	AGT	1
GO:0034435	cholesterol esterification	1/183	15/15278	0.16543	0.439641	0.3949	AGT	1
GO:0042501	serine phosphorylation of STAT protein	1/183	15/15278	0.16543	0.439641	0.3949	RET	1
GO:0043174	nucleoside salvage	1/183	15/15278	0.16543	0.439641	0.3949	UCK2	1
GO:0044827	modulation by host of viral genome replication	1/183	15/15278	0.16543	0.439641	0.3949	PPIB	1
GO:0045989	positive regulation of striated muscle contraction	1/183	15/15278	0.16543	0.439641	0.3949	ADRA1A	1
GO:0046134	pyrimidine nucleoside biosynthetic process	1/183	15/15278	0.16543	0.439641	0.3949	UCK2	1
GO:0060339	negative regulation of type I interferon-mediated signaling pathway	1/183	15/15278	0.16543	0.439641	0.3949	SAMHD1	1
GO:0060766	negative regulation of androgen receptor signaling pathway	1/183	15/15278	0.16543	0.439641	0.3949	HEYL	1
GO:0070571	negative regulation of neuron projection regeneration	1/183	15/15278	0.16543	0.439641	0.3949	SPP1	1
GO:0070831	basement membrane assembly	1/183	15/15278	0.16543	0.439641	0.3949	LAMB3	1
GO:0071801	regulation of podosome assembly	1/183	15/15278	0.16543	0.439641	0.3949	LCP1	1
GO:0090083	regulation of inclusion body assembly	1/183	15/15278	0.16543	0.439641	0.3949	HSPA1B	1
GO:0090343	positive regulation of cell aging	1/183	15/15278	0.16543	0.439641	0.3949	B2M	1
GO:0097091	synaptic vesicle clustering	1/183	15/15278	0.16543	0.439641	0.3949	SYN3	1
GO:1900424	regulation of defense response to bacterium	1/183	15/15278	0.16543	0.439641	0.3949	KLK7	1
GO:1901201	regulation of extracellular matrix assembly	1/183	15/15278	0.16543	0.439641	0.3949	AGT	1
GO:1904889	regulation of excitatory synapse assembly	1/183	15/15278	0.16543	0.439641	0.3949	LRRC4B	1
GO:1905146	lysosomal protein catabolic process	1/183	15/15278	0.16543	0.439641	0.3949	GBA	1
GO:1905288	vascular associated smooth muscle cell apoptotic process	1/183	15/15278	0.16543	0.439641	0.3949	ATF4	1
GO:1905459	regulation of vascular associated smooth muscle cell apoptotic process	1/183	15/15278	0.16543	0.439641	0.3949	ATF4	1
GO:1905874	regulation of postsynaptic density organization	1/183	15/15278	0.16543	0.439641	0.3949	LRRC4B	1
GO:0021953	central nervous system neuron differentiation	4/183	178/15278	0.165461	0.439641	0.3949	B2M/PLXNA4/CHD5/MDGA1	4
GO:0035773	insulin secretion involved in cellular response to glucose stimulus	2/183	61/15278	0.165751	0.440015	0.395236	PTPRN/ADCY8	2
GO:0001503	ossification	7/183	377/15278	0.167384	0.44395	0.39877	SPP1/CITED1/IGFBP5/ATF4/COL1A1/THRA/SLC24A3	7
GO:0006720	isoprenoid metabolic process	3/183	118/15278	0.168318	0.445627	0.400276	LRP8/SCPEP1/CYP4V2	3
GO:0007156	homophilic cell adhesion via plasma membrane adhesion molecules	3/183	118/15278	0.168318	0.445627	0.400276	RET/CDH13/PTPRT	3
GO:0048872	homeostasis of number of cells	5/183	244/15278	0.169397	0.447528	0.401984	SLC7A11/B2M/ACVR1B/THRA/HSPA1B	5
GO:0030239	myofibril assembly	2/183	62/15278	0.170003	0.447528	0.401984	PGM5/FHOD3	2
GO:0035924	cellular response to vascular endothelial growth factor stimulus	2/183	62/15278	0.170003	0.447528	0.401984	CD63/ERN1	2
GO:0051965	positive regulation of synapse assembly	2/183	62/15278	0.170003	0.447528	0.401984	LRRC4B/LRTM2	2
GO:0060675	ureteric bud morphogenesis	2/183	62/15278	0.170003	0.447528	0.401984	CITED1/AGT	2
GO:0071300	cellular response to retinoic acid	2/183	62/15278	0.170003	0.447528	0.401984	RET/COL1A1	2
GO:0050770	regulation of axonogenesis	4/183	180/15278	0.170097	0.447528	0.401984	SPP1/SEMA5A/PLXNA4/RET	4
GO:2001233	regulation of apoptotic signaling pathway	7/183	379/15278	0.170497	0.447612	0.402059	SCG2/RET/AGT/P4HB/HSPA1B/SELENOS/ERP29	7
GO:0030522	intracellular receptor signaling pathway	5/183	245/15278	0.171371	0.447612	0.402059	CITED2/HEYL/THRA/HSPA1B/CREM	5
GO:0045861	negative regulation of proteolysis	6/183	312/15278	0.172227	0.447612	0.402059	ANXA2/CHAC1/AGT/PRKCG/SERPINB10/CRYAB	6
GO:0042177	negative regulation of protein catabolic process	3/183	120/15278	0.174203	0.447612	0.402059	ANXA2/PRKCG/CTSA	3
GO:1904892	regulation of receptor signaling pathway via STAT	3/183	120/15278	0.174203	0.447612	0.402059	RET/AGT/PTPRT	3
GO:0006026	aminoglycan catabolic process	2/183	63/15278	0.174272	0.447612	0.402059	FUCA1/ACAN	2
GO:0035914	skeletal muscle cell differentiation	2/183	63/15278	0.174272	0.447612	0.402059	FOS/HEYL	2
GO:0040014	regulation of multicellular organism growth	2/183	63/15278	0.174272	0.447612	0.402059	PPIB/MFSD2A	2
GO:0046513	ceramide biosynthetic process	2/183	63/15278	0.174272	0.447612	0.402059	ST6GALNAC5/GBA	2
GO:0050891	multicellular organismal water homeostasis	2/183	63/15278	0.174272	0.447612	0.402059	ADCY8/GBA	2
GO:0060135	maternal process involved in female pregnancy	2/183	63/15278	0.174272	0.447612	0.402059	SPP1/PAM	2
GO:0072171	mesonephric tubule morphogenesis	2/183	63/15278	0.174272	0.447612	0.402059	CITED1/AGT	2
GO:0043406	positive regulation of MAP kinase activity	5/183	247/15278	0.175345	0.447612	0.402059	DUSP9/RET/AGT/ERN1/ERP29	5
GO:0000394	RNA splicing, via endonucleolytic cleavage and ligation	1/183	16/15278	0.175436	0.447612	0.402059	ERN1	1
GO:0001780	neutrophil homeostasis	1/183	16/15278	0.175436	0.447612	0.402059	SLC7A11	1
GO:0002922	positive regulation of humoral immune response	1/183	16/15278	0.175436	0.447612	0.402059	KLK7	1
GO:0006450	regulation of translational fidelity	1/183	16/15278	0.175436	0.447612	0.402059	LARS2	1
GO:0009084	glutamine family amino acid biosynthetic process	1/183	16/15278	0.175436	0.447612	0.402059	ASS1	1
GO:0009299	mRNA transcription	1/183	16/15278	0.175436	0.447612	0.402059	ATF4	1
GO:0009312	oligosaccharide biosynthetic process	1/183	16/15278	0.175436	0.447612	0.402059	ST6GALNAC5	1
GO:0010919	regulation of inositol phosphate biosynthetic process	1/183	16/15278	0.175436	0.447612	0.402059	ADCYAP1R1	1
GO:0019511	peptidyl-proline hydroxylation	1/183	16/15278	0.175436	0.447612	0.402059	P4HB	1
GO:0021783	preganglionic parasympathetic fiber development	1/183	16/15278	0.175436	0.447612	0.402059	PLXNA4	1
GO:0030033	microvillus assembly	1/183	16/15278	0.175436	0.447612	0.402059	RAP1GAP	1
GO:0034393	positive regulation of smooth muscle cell apoptotic process	1/183	16/15278	0.175436	0.447612	0.402059	ATF4	1
GO:0048532	anatomical structure arrangement	1/183	16/15278	0.175436	0.447612	0.402059	PLXNA4	1
GO:0060252	positive regulation of glial cell proliferation	1/183	16/15278	0.175436	0.447612	0.402059	ETV5	1
GO:0060850	regulation of transcription involved in cell fate commitment	1/183	16/15278	0.175436	0.447612	0.402059	CHD5	1
GO:0071871	response to epinephrine	1/183	16/15278	0.175436	0.447612	0.402059	RYR2	1
GO:0072224	metanephric glomerulus development	1/183	16/15278	0.175436	0.447612	0.402059	RET	1
GO:0072283	metanephric renal vesicle morphogenesis	1/183	16/15278	0.175436	0.447612	0.402059	CITED1	1
GO:0072677	eosinophil migration	1/183	16/15278	0.175436	0.447612	0.402059	SCG2	1
GO:0090185	negative regulation of kidney development	1/183	16/15278	0.175436	0.447612	0.402059	CITED1	1
GO:1900121	negative regulation of receptor binding	1/183	16/15278	0.175436	0.447612	0.402059	B2M	1
GO:1905939	regulation of gonad development	1/183	16/15278	0.175436	0.447612	0.402059	CITED2	1
GO:0032147	activation of protein kinase activity	6/183	314/15278	0.175728	0.44797	0.40238	DUSP9/RET/AGT/ERN1/ADCY8/ERP29	6
GO:0002377	immunoglobulin production	3/183	121/15278	0.177168	0.450862	0.404978	FGL2/SAMHD1/HLA-DQB1	3
GO:0002576	platelet degranulation	3/183	121/15278	0.177168	0.450862	0.404978	ANXA5/SCG3/CD63	3
GO:0072593	reactive oxygen species metabolic process	5/183	248/15278	0.177346	0.450926	0.405036	GLA/AGT/ASS1/SELENOS/CRYAB	5
GO:0032370	positive regulation of lipid transport	2/183	64/15278	0.17856	0.453231	0.407107	SPP1/ANXA2	2
GO:0042440	pigment metabolic process	2/183	64/15278	0.17856	0.453231	0.407107	SLC7A11/CITED1	2
GO:0016050	vesicle organization	6/183	316/15278	0.179258	0.454456	0.408206	ANXA2/PTPRN/SYT9/DLG4/UNC13A/SYT4	6
GO:0030258	lipid modification	5/183	249/15278	0.179355	0.454456	0.408206	DGKG/AGT/MFSD2A/GBA/CYP4V2	5
GO:0042445	hormone metabolic process	4/183	184/15278	0.179504	0.454456	0.408206	SPP1/PCSK1/SCPEP1/PCSK2	4
GO:0003231	cardiac ventricle development	3/183	122/15278	0.180146	0.455302	0.408966	RYR2/CITED2/HEYL	3
GO:0097530	granulocyte migration	3/183	122/15278	0.180146	0.455302	0.408966	PPIB/SCG2/GP2	3
GO:0051091	positive regulation of DNA-binding transcription factor activity	5/183	250/15278	0.181373	0.456275	0.40984	CAMK2A/AGT/LRP8/HSPA1B/ADCY8	5
GO:0071356	cellular response to tumor necrosis factor	5/183	250/15278	0.181373	0.456275	0.40984	TNFRSF9/ASS1/COL1A1/HSPA1B/GBA	5
GO:0014910	regulation of smooth muscle cell migration	2/183	65/15278	0.182863	0.456275	0.40984	IGFBP5/AGT	2
GO:1903779	regulation of cardiac conduction	2/183	65/15278	0.182863	0.456275	0.40984	AGT/RYR2	2
GO:0050792	regulation of viral process	4/183	186/15278	0.184272	0.456275	0.40984	PPIB/LGALS1/P4HB/BTBD17	4
GO:0043405	regulation of MAP kinase activity	6/183	319/15278	0.184607	0.456275	0.40984	DUSP9/RET/AGT/ERN1/GBA/ERP29	6
GO:0003085	negative regulation of systemic arterial blood pressure	1/183	17/15278	0.185323	0.456275	0.40984	ADRA1A	1
GO:0003184	pulmonary valve morphogenesis	1/183	17/15278	0.185323	0.456275	0.40984	HEYL	1
GO:0003198	epithelial to mesenchymal transition involved in endocardial cushion formation	1/183	17/15278	0.185323	0.456275	0.40984	HEYL	1
GO:0006491	N-glycan processing	1/183	17/15278	0.185323	0.456275	0.40984	PRKCSH	1
GO:0006586	indolalkylamine metabolic process	1/183	17/15278	0.185323	0.456275	0.40984	AFMID	1
GO:0009200	deoxyribonucleoside triphosphate metabolic process	1/183	17/15278	0.185323	0.456275	0.40984	SAMHD1	1
GO:0010744	positive regulation of macrophage derived foam cell differentiation	1/183	17/15278	0.185323	0.456275	0.40984	AGT	1
GO:0019883	antigen processing and presentation of endogenous antigen	1/183	17/15278	0.185323	0.456275	0.40984	B2M	1
GO:0033194	response to hydroperoxide	1/183	17/15278	0.185323	0.456275	0.40984	RNF112	1
GO:0034199	activation of protein kinase A activity	1/183	17/15278	0.185323	0.456275	0.40984	ADCY8	1
GO:0035813	regulation of renal sodium excretion	1/183	17/15278	0.185323	0.456275	0.40984	AGT	1
GO:0045721	negative regulation of gluconeogenesis	1/183	17/15278	0.185323	0.456275	0.40984	SIK1	1
GO:0048486	parasympathetic nervous system development	1/183	17/15278	0.185323	0.456275	0.40984	PLXNA4	1
GO:0051412	response to corticosterone	1/183	17/15278	0.185323	0.456275	0.40984	FOS	1
GO:0051767	nitric-oxide synthase biosynthetic process	1/183	17/15278	0.185323	0.456275	0.40984	SELENOS	1
GO:0051769	regulation of nitric-oxide synthase biosynthetic process	1/183	17/15278	0.185323	0.456275	0.40984	SELENOS	1
GO:0060080	inhibitory postsynaptic potential	1/183	17/15278	0.185323	0.456275	0.40984	INSYN2A	1
GO:0072189	ureter development	1/183	17/15278	0.185323	0.456275	0.40984	RET	1
GO:0090190	positive regulation of branching involved in ureteric bud morphogenesis	1/183	17/15278	0.185323	0.456275	0.40984	AGT	1
GO:0098911	regulation of ventricular cardiac muscle cell action potential	1/183	17/15278	0.185323	0.456275	0.40984	RYR2	1
GO:1901881	positive regulation of protein depolymerization	1/183	17/15278	0.185323	0.456275	0.40984	SEMA5A	1
GO:1902236	negative regulation of endoplasmic reticulum stress-induced intrinsic apoptotic signaling pathway	1/183	17/15278	0.185323	0.456275	0.40984	SELENOS	1
GO:1905331	negative regulation of morphogenesis of an epithelium	1/183	17/15278	0.185323	0.456275	0.40984	CITED1	1
GO:2000678	negative regulation of transcription regulatory region DNA binding	1/183	17/15278	0.185323	0.456275	0.40984	ZNF593	1
GO:2000696	regulation of epithelial cell differentiation involved in kidney development	1/183	17/15278	0.185323	0.456275	0.40984	CITED1	1
GO:0003206	cardiac chamber morphogenesis	3/183	124/15278	0.186144	0.457534	0.410971	RYR2/CITED2/HEYL	3
GO:0046887	positive regulation of hormone secretion	3/183	124/15278	0.186144	0.457534	0.410971	SPP1/MYRIP/ADCY8	3
GO:0038034	signal transduction in absence of ligand	2/183	66/15278	0.187182	0.459318	0.412574	RET/HSPA1B	2
GO:0097192	extrinsic apoptotic signaling pathway in absence of ligand	2/183	66/15278	0.187182	0.459318	0.412574	RET/HSPA1B	2
GO:0050708	regulation of protein secretion	6/183	321/15278	0.188207	0.461452	0.414491	PAM/SYT9/MYRIP/ADCY8/ERP29/SYT4	6
GO:0016042	lipid catabolic process	6/183	322/15278	0.190018	0.462175	0.41514	SPP1/GLA/FUCA1/MFSD2A/THRA/GBA	6
GO:0003208	cardiac ventricle morphogenesis	2/183	67/15278	0.191514	0.462175	0.41514	RYR2/HEYL	2
GO:0005977	glycogen metabolic process	2/183	67/15278	0.191514	0.462175	0.41514	PYGM/SELENOS	2
GO:0050795	regulation of behavior	2/183	67/15278	0.191514	0.462175	0.41514	DLG4/OPRL1	2
GO:0099072	regulation of postsynaptic membrane neurotransmitter receptor levels	2/183	67/15278	0.191514	0.462175	0.41514	DLG4/ARC	2
GO:0150076	neuroinflammatory response	2/183	67/15278	0.191514	0.462175	0.41514	C1QA/ADCY8	2
GO:0001101	response to acid chemical	3/183	126/15278	0.192194	0.462175	0.41514	COL3A1/ASS1/COL1A1	3
GO:0044106	cellular amine metabolic process	3/183	126/15278	0.192194	0.462175	0.41514	SLC7A11/SAT1/AFMID	3
GO:0046942	carboxylic acid transport	6/183	324/15278	0.19366	0.462175	0.41514	SLC7A11/AGT/SLC3A2/MFSD2A/SLC38A2/SYT4	6
GO:0001696	gastric acid secretion	1/183	18/15278	0.195092	0.462175	0.41514	OPRL1	1
GO:0002577	regulation of antigen processing and presentation	1/183	18/15278	0.195092	0.462175	0.41514	FGL2	1
GO:0006670	sphingosine metabolic process	1/183	18/15278	0.195092	0.462175	0.41514	GBA	1
GO:0006833	water transport	1/183	18/15278	0.195092	0.462175	0.41514	SLC14A1	1
GO:0006883	cellular sodium ion homeostasis	1/183	18/15278	0.195092	0.462175	0.41514	AGT	1
GO:0007221	positive regulation of transcription of Notch receptor target	1/183	18/15278	0.195092	0.462175	0.41514	HEYL	1
GO:0008356	asymmetric cell division	1/183	18/15278	0.195092	0.462175	0.41514	ETV5	1
GO:0009264	deoxyribonucleotide catabolic process	1/183	18/15278	0.195092	0.462175	0.41514	SAMHD1	1
GO:0015802	basic amino acid transport	1/183	18/15278	0.195092	0.462175	0.41514	AGT	1
GO:0021756	striatum development	1/183	18/15278	0.195092	0.462175	0.41514	SLC7A11	1
GO:0032928	regulation of superoxide anion generation	1/183	18/15278	0.195092	0.462175	0.41514	AGT	1
GO:0033630	positive regulation of cell adhesion mediated by integrin	1/183	18/15278	0.195092	0.462175	0.41514	RET	1
GO:0035269	protein O-linked mannosylation	1/183	18/15278	0.195092	0.462175	0.41514	SDF2L1	1
GO:0036035	osteoclast development	1/183	18/15278	0.195092	0.462175	0.41514	ANXA2	1
GO:0043031	negative regulation of macrophage activation	1/183	18/15278	0.195092	0.462175	0.41514	VSIG4	1
GO:0045780	positive regulation of bone resorption	1/183	18/15278	0.195092	0.462175	0.41514	SPP1	1
GO:0045947	negative regulation of translational initiation	1/183	18/15278	0.195092	0.462175	0.41514	ATF4	1
GO:0046852	positive regulation of bone remodeling	1/183	18/15278	0.195092	0.462175	0.41514	SPP1	1
GO:0048485	sympathetic nervous system development	1/183	18/15278	0.195092	0.462175	0.41514	PLXNA4	1
GO:0055003	cardiac myofibril assembly	1/183	18/15278	0.195092	0.462175	0.41514	FHOD3	1
GO:0060004	reflex	1/183	18/15278	0.195092	0.462175	0.41514	ADRA1A	1
GO:0071404	cellular response to low-density lipoprotein particle stimulus	1/183	18/15278	0.195092	0.462175	0.41514	CDH13	1
GO:0071498	cellular response to fluid shear stress	1/183	18/15278	0.195092	0.462175	0.41514	ASS1	1
GO:0072077	renal vesicle morphogenesis	1/183	18/15278	0.195092	0.462175	0.41514	CITED1	1
GO:0086014	atrial cardiac muscle cell action potential	1/183	18/15278	0.195092	0.462175	0.41514	RYR2	1
GO:0086026	atrial cardiac muscle cell to AV node cell signaling	1/183	18/15278	0.195092	0.462175	0.41514	RYR2	1
GO:0086066	atrial cardiac muscle cell to AV node cell communication	1/183	18/15278	0.195092	0.462175	0.41514	RYR2	1
GO:0097503	sialylation	1/183	18/15278	0.195092	0.462175	0.41514	ST6GALNAC5	1
GO:1902259	regulation of delayed rectifier potassium channel activity	1/183	18/15278	0.195092	0.462175	0.41514	KCNAB1	1
GO:0006638	neutral lipid metabolic process	3/183	127/15278	0.195238	0.462175	0.41514	DGKG/SIK1/MFSD2A	3
GO:0006639	acylglycerol metabolic process	3/183	127/15278	0.195238	0.462175	0.41514	DGKG/SIK1/MFSD2A	3
GO:0006073	cellular glucan metabolic process	2/183	68/15278	0.195861	0.462175	0.41514	PYGM/SELENOS	2
GO:0042982	amyloid precursor protein metabolic process	2/183	68/15278	0.195861	0.462175	0.41514	EFNA3/UNC13A	2
GO:0043967	histone H4 acetylation	2/183	68/15278	0.195861	0.462175	0.41514	CHD5/USP22	2
GO:0044042	glucan metabolic process	2/183	68/15278	0.195861	0.462175	0.41514	PYGM/SELENOS	2
GO:0070373	negative regulation of ERK1 and ERK2 cascade	2/183	68/15278	0.195861	0.462175	0.41514	DUSP9/C1QL4	2
GO:0072078	nephron tubule morphogenesis	2/183	68/15278	0.195861	0.462175	0.41514	CITED1/AGT	2
GO:2001259	positive regulation of cation channel activity	2/183	68/15278	0.195861	0.462175	0.41514	ARC/CTSS	2
GO:0015849	organic acid transport	6/183	327/15278	0.199172	0.469614	0.421822	SLC7A11/AGT/SLC3A2/MFSD2A/SLC38A2/SYT4	6
GO:0042060	wound healing	8/183	468/15278	0.199867	0.470205	0.422352	DGKG/SLC7A11/ANXA5/ANXA2/COL3A1/PRKCG/COL1A1/VKORC1	8
GO:0014823	response to activity	2/183	69/15278	0.200219	0.470205	0.422352	AGT/RYR2	2
GO:0032024	positive regulation of insulin secretion	2/183	69/15278	0.200219	0.470205	0.422352	MYRIP/ADCY8	2
GO:0050771	negative regulation of axonogenesis	2/183	69/15278	0.200219	0.470205	0.422352	SPP1/SEMA5A	2
GO:0060761	negative regulation of response to cytokine stimulus	2/183	69/15278	0.200219	0.470205	0.422352	SAMHD1/TLE5	2
GO:0002573	myeloid leukocyte differentiation	4/183	193/15278	0.201279	0.470355	0.422487	ANXA2/FOS/C1QC/NME1	4
GO:0044409	entry into host	3/183	129/15278	0.20136	0.470355	0.422487	LGALS1/P4HB/HSPA1B	3
GO:1901888	regulation of cell junction assembly	4/183	194/15278	0.203746	0.470355	0.422487	AGT/LRRC4B/MDGA1/LRTM2	4
GO:0060485	mesenchyme development	5/183	261/15278	0.204109	0.470355	0.422487	SEMA5A/RET/CITED2/HEYL/COL1A1	5
GO:0001508	action potential	3/183	130/15278	0.204438	0.470355	0.422487	RYR2/GBA/ADRA1A	3
GO:0060048	cardiac muscle contraction	3/183	130/15278	0.204438	0.470355	0.422487	ADRA1B/RYR2/ADRA1A	3
GO:0071901	negative regulation of protein serine/threonine kinase activity	3/183	130/15278	0.204438	0.470355	0.422487	DUSP9/AGT/GBA	3
GO:0009142	nucleoside triphosphate biosynthetic process	2/183	70/15278	0.204589	0.470355	0.422487	NME1/UCK2	2
GO:0019226	transmission of nerve impulse	2/183	70/15278	0.204589	0.470355	0.422487	AGT/GBA	2
GO:0030279	negative regulation of ossification	2/183	70/15278	0.204589	0.470355	0.422487	CITED1/IGFBP5	2
GO:0060415	muscle tissue morphogenesis	2/183	70/15278	0.204589	0.470355	0.422487	COL3A1/RYR2	2
GO:0072088	nephron epithelium morphogenesis	2/183	70/15278	0.204589	0.470355	0.422487	CITED1/AGT	2
GO:1900076	regulation of cellular response to insulin stimulus	2/183	70/15278	0.204589	0.470355	0.422487	AGT/ECHDC3	2
GO:0002683	negative regulation of immune system process	7/183	400/15278	0.20466	0.470355	0.422487	VSIG4/COL3A1/FGL2/C1QC/NME1/SAMHD1/SELENOS	7
GO:0002726	positive regulation of T cell cytokine production	1/183	19/15278	0.204745	0.470355	0.422487	B2M	1
GO:0007039	protein catabolic process in the vacuole	1/183	19/15278	0.204745	0.470355	0.422487	GBA	1
GO:0007194	negative regulation of adenylate cyclase activity	1/183	19/15278	0.204745	0.470355	0.422487	GABBR2	1
GO:0007213	G protein-coupled acetylcholine receptor signaling pathway	1/183	19/15278	0.204745	0.470355	0.422487	CHRM2	1
GO:0010042	response to manganese ion	1/183	19/15278	0.204745	0.470355	0.422487	ATF4	1
GO:0010829	negative regulation of glucose transmembrane transport	1/183	19/15278	0.204745	0.470355	0.422487	SELENOS	1
GO:0010984	regulation of lipoprotein particle clearance	1/183	19/15278	0.204745	0.470355	0.422487	ANXA2	1
GO:0034312	diol biosynthetic process	1/183	19/15278	0.204745	0.470355	0.422487	GBA	1
GO:0035812	renal sodium excretion	1/183	19/15278	0.204745	0.470355	0.422487	AGT	1
GO:0043950	positive regulation of cAMP-mediated signaling	1/183	19/15278	0.204745	0.470355	0.422487	ADCYAP1R1	1
GO:0046386	deoxyribose phosphate catabolic process	1/183	19/15278	0.204745	0.470355	0.422487	SAMHD1	1
GO:0071397	cellular response to cholesterol	1/183	19/15278	0.204745	0.470355	0.422487	LRP8	1
GO:0071800	podosome assembly	1/183	19/15278	0.204745	0.470355	0.422487	LCP1	1
GO:0072087	renal vesicle development	1/183	19/15278	0.204745	0.470355	0.422487	CITED1	1
GO:0034764	positive regulation of transmembrane transport	4/183	195/15278	0.206223	0.473119	0.424971	AGT/RYR2/ARC/CTSS	4
GO:0048565	digestive tract development	3/183	131/15278	0.207528	0.473119	0.424971	COL3A1/RET/ASS1	3
GO:0050921	positive regulation of chemotaxis	3/183	131/15278	0.207528	0.473119	0.424971	SEMA5A/SCG2/CDH13	3
GO:1903707	negative regulation of hemopoiesis	3/183	131/15278	0.207528	0.473119	0.424971	FGL2/C1QC/NME1	3
GO:0014015	positive regulation of gliogenesis	2/183	71/15278	0.20897	0.473119	0.424971	ETV5/RNF112	2
GO:0030104	water homeostasis	2/183	71/15278	0.20897	0.473119	0.424971	ADCY8/GBA	2
GO:0051702	interaction with symbiont	2/183	71/15278	0.20897	0.473119	0.424971	PPIB/ANXA2	2
GO:0051604	protein maturation	5/183	264/15278	0.210471	0.473119	0.424971	PCSK1/CHAC1/PCSK2/CTSS/ADAMTS2	5
GO:0003281	ventricular septum development	2/183	72/15278	0.21336	0.473119	0.424971	CITED2/HEYL	2
GO:0006446	regulation of translational initiation	2/183	72/15278	0.21336	0.473119	0.424971	ATF4/PPP1R15B	2
GO:0006826	iron ion transport	2/183	72/15278	0.21336	0.473119	0.424971	B2M/ATP6V0B	2
GO:0007492	endoderm development	2/183	72/15278	0.21336	0.473119	0.424971	ARC/LAMB3	2
GO:0014909	smooth muscle cell migration	2/183	72/15278	0.21336	0.473119	0.424971	IGFBP5/AGT	2
GO:0061333	renal tubule morphogenesis	2/183	72/15278	0.21336	0.473119	0.424971	CITED1/AGT	2
GO:0072028	nephron morphogenesis	2/183	72/15278	0.21336	0.473119	0.424971	CITED1/AGT	2
GO:0043903	regulation of symbiotic process	4/183	198/15278	0.213705	0.473119	0.424971	PPIB/LGALS1/P4HB/BTBD17	4
GO:0030534	adult behavior	3/183	133/15278	0.213738	0.473119	0.424971	SLC7A11/NRXN2/KLHL1	3
GO:0048284	organelle fusion	3/183	133/15278	0.213738	0.473119	0.424971	ANXA2/SYT9/SYT4	3
GO:0002089	lens morphogenesis in camera-type eye	1/183	20/15278	0.214282	0.473119	0.424971	ATF4	1
GO:0006379	mRNA cleavage	1/183	20/15278	0.214282	0.473119	0.424971	ERN1	1
GO:0006525	arginine metabolic process	1/183	20/15278	0.214282	0.473119	0.424971	ASS1	1
GO:0007530	sex determination	1/183	20/15278	0.214282	0.473119	0.424971	CITED2	1
GO:0007617	mating behavior	1/183	20/15278	0.214282	0.473119	0.424971	THRA	1
GO:0010881	regulation of cardiac muscle contraction by regulation of the release of sequestered calcium ion	1/183	20/15278	0.214282	0.473119	0.424971	RYR2	1
GO:0016082	synaptic vesicle priming	1/183	20/15278	0.214282	0.473119	0.424971	UNC13A	1
GO:0016540	protein autoprocessing	1/183	20/15278	0.214282	0.473119	0.424971	PCSK2	1
GO:0021516	dorsal spinal cord development	1/183	20/15278	0.214282	0.473119	0.424971	MDGA1	1
GO:0030878	thyroid gland development	1/183	20/15278	0.214282	0.473119	0.424971	THRA	1
GO:0031998	regulation of fatty acid beta-oxidation	1/183	20/15278	0.214282	0.473119	0.424971	MFSD2A	1
GO:0032516	positive regulation of phosphoprotein phosphatase activity	1/183	20/15278	0.214282	0.473119	0.424971	PPP1R15B	1
GO:0034104	negative regulation of tissue remodeling	1/183	20/15278	0.214282	0.473119	0.424971	AGT	1
GO:0035809	regulation of urine volume	1/183	20/15278	0.214282	0.473119	0.424971	OPRL1	1
GO:0042451	purine nucleoside biosynthetic process	1/183	20/15278	0.214282	0.473119	0.424971	NME1	1
GO:0042455	ribonucleoside biosynthetic process	1/183	20/15278	0.214282	0.473119	0.424971	NME1	1
GO:0042573	retinoic acid metabolic process	1/183	20/15278	0.214282	0.473119	0.424971	SCPEP1	1
GO:0044062	regulation of excretion	1/183	20/15278	0.214282	0.473119	0.424971	AGT	1
GO:0045056	transcytosis	1/183	20/15278	0.214282	0.473119	0.424971	MFSD2A	1
GO:0046129	purine ribonucleoside biosynthetic process	1/183	20/15278	0.214282	0.473119	0.424971	NME1	1
GO:0046519	sphingoid metabolic process	1/183	20/15278	0.214282	0.473119	0.424971	GBA	1
GO:0048670	regulation of collateral sprouting	1/183	20/15278	0.214282	0.473119	0.424971	SPP1	1
GO:0055093	response to hyperoxia	1/183	20/15278	0.214282	0.473119	0.424971	COL1A1	1
GO:0060231	mesenchymal to epithelial transition	1/183	20/15278	0.214282	0.473119	0.424971	CITED1	1
GO:0061003	positive regulation of dendritic spine morphogenesis	1/183	20/15278	0.214282	0.473119	0.424971	LRP8	1
GO:0061213	positive regulation of mesonephros development	1/183	20/15278	0.214282	0.473119	0.424971	AGT	1
GO:0070262	peptidyl-serine dephosphorylation	1/183	20/15278	0.214282	0.473119	0.424971	PPP1R15B	1
GO:0070734	histone H3-K27 methylation	1/183	20/15278	0.214282	0.473119	0.424971	CHD5	1
GO:0098780	response to mitochondrial depolarisation	1/183	20/15278	0.214282	0.473119	0.424971	GBA	1
GO:0098884	postsynaptic neurotransmitter receptor internalization	1/183	20/15278	0.214282	0.473119	0.424971	ARC	1
GO:0140239	postsynaptic endocytosis	1/183	20/15278	0.214282	0.473119	0.424971	ARC	1
GO:1903055	positive regulation of extracellular matrix organization	1/183	20/15278	0.214282	0.473119	0.424971	AGT	1
GO:1903599	positive regulation of autophagy of mitochondrion	1/183	20/15278	0.214282	0.473119	0.424971	GBA	1
GO:2001026	regulation of endothelial cell chemotaxis	1/183	20/15278	0.214282	0.473119	0.424971	SEMA5A	1
GO:0008406	gonad development	4/183	199/15278	0.216216	0.477033	0.428486	MAMLD1/PTPRN/CITED2/VGF	4
GO:0009308	amine metabolic process	3/183	134/15278	0.216858	0.478092	0.429437	SLC7A11/SAT1/AFMID	3
GO:0009199	ribonucleoside triphosphate metabolic process	2/183	73/15278	0.217759	0.478293	0.429617	NME1/UCK2	2
GO:0014032	neural crest cell development	2/183	73/15278	0.217759	0.478293	0.429617	SEMA5A/RET	2
GO:0060411	cardiac septum morphogenesis	2/183	73/15278	0.217759	0.478293	0.429617	CITED2/HEYL	2
GO:0072527	pyrimidine-containing compound metabolic process	2/183	73/15278	0.217759	0.478293	0.429617	NME1/UCK2	2
GO:0099601	regulation of neurotransmitter receptor activity	2/183	73/15278	0.217759	0.478293	0.429617	DLG4/ARC	2
GO:0050900	leukocyte migration	7/183	408/15278	0.218327	0.478541	0.429841	SLC7A11/PPIB/SCG2/RET/SLC3A2/COL1A1/GP2	7
GO:0006936	muscle contraction	6/183	338/15278	0.219868	0.478541	0.429841	ADRA1B/CHRM2/AGT/RYR2/CRYAB/ADRA1A	6
GO:0034329	cell junction assembly	7/183	409/15278	0.220058	0.478541	0.429841	AGT/LRRC4B/NRXN2/MDGA1/LAMB3/LAMC2/LRTM2	7
GO:0001822	kidney development	5/183	269/15278	0.221216	0.478541	0.429841	CITED1/RET/AGT/HEYL/ASS1	5
GO:0019882	antigen processing and presentation	4/183	201/15278	0.221263	0.478541	0.429841	B2M/FGL2/HLA-DQB1/CTSS	4
GO:0050678	regulation of epithelial cell proliferation	6/183	339/15278	0.221786	0.478541	0.429841	SEMA5A/B2M/PTPRN/SCG2/CDH13/NME1	6
GO:0031397	negative regulation of protein ubiquitination	2/183	74/15278	0.222166	0.478541	0.429841	PRKCG/HSPA1B	2
GO:0035050	embryonic heart tube development	2/183	74/15278	0.222166	0.478541	0.429841	RYR2/CITED2	2
GO:0050688	regulation of defense response to virus	2/183	74/15278	0.222166	0.478541	0.429841	FGL2/RNF216	2
GO:0034612	response to tumor necrosis factor	5/183	270/15278	0.223385	0.478541	0.429841	TNFRSF9/ASS1/COL1A1/HSPA1B/GBA	5
GO:0001573	ganglioside metabolic process	1/183	21/15278	0.223706	0.478541	0.429841	ST6GALNAC5	1
GO:0001916	positive regulation of T cell mediated cytotoxicity	1/183	21/15278	0.223706	0.478541	0.429841	B2M	1
GO:0001919	regulation of receptor recycling	1/183	21/15278	0.223706	0.478541	0.429841	ANXA2	1
GO:0003177	pulmonary valve development	1/183	21/15278	0.223706	0.478541	0.429841	HEYL	1
GO:0005980	glycogen catabolic process	1/183	21/15278	0.223706	0.478541	0.429841	PYGM	1
GO:0007289	spermatid nucleus differentiation	1/183	21/15278	0.223706	0.478541	0.429841	CHD5	1
GO:0009068	aspartate family amino acid catabolic process	1/183	21/15278	0.223706	0.478541	0.429841	ASRGL1	1
GO:0009190	cyclic nucleotide biosynthetic process	1/183	21/15278	0.223706	0.478541	0.429841	ADCY8	1
GO:0031280	negative regulation of cyclase activity	1/183	21/15278	0.223706	0.478541	0.429841	GABBR2	1
GO:0035357	peroxisome proliferator activated receptor signaling pathway	1/183	21/15278	0.223706	0.478541	0.429841	CITED2	1
GO:0035584	calcium-mediated signaling using intracellular calcium source	1/183	21/15278	0.223706	0.478541	0.429841	RYR2	1
GO:0045649	regulation of macrophage differentiation	1/183	21/15278	0.223706	0.478541	0.429841	C1QC	1
GO:0045943	positive regulation of transcription by RNA polymerase I	1/183	21/15278	0.223706	0.478541	0.429841	ATF4	1
GO:0052652	cyclic purine nucleotide metabolic process	1/183	21/15278	0.223706	0.478541	0.429841	ADCY8	1
GO:0060487	lung epithelial cell differentiation	1/183	21/15278	0.223706	0.478541	0.429841	THRA	1
GO:0060972	left/right pattern formation	1/183	21/15278	0.223706	0.478541	0.429841	CITED2	1
GO:0090169	regulation of spindle assembly	1/183	21/15278	0.223706	0.478541	0.429841	HSPA1B	1
GO:0090189	regulation of branching involved in ureteric bud morphogenesis	1/183	21/15278	0.223706	0.478541	0.429841	AGT	1
GO:0099633	protein localization to postsynaptic specialization membrane	1/183	21/15278	0.223706	0.478541	0.429841	DLG4	1
GO:0099645	neurotransmitter receptor localization to postsynaptic specialization membrane	1/183	21/15278	0.223706	0.478541	0.429841	DLG4	1
GO:1901017	negative regulation of potassium ion transmembrane transporter activity	1/183	21/15278	0.223706	0.478541	0.429841	KCNAB1	1
GO:1901522	positive regulation of transcription from RNA polymerase II promoter involved in cellular response to chemical stimulus	1/183	21/15278	0.223706	0.478541	0.429841	ATF4	1
GO:1901798	positive regulation of signal transduction by p53 class mediator	1/183	21/15278	0.223706	0.478541	0.429841	CHD5	1
GO:1903306	negative regulation of regulated secretory pathway	1/183	21/15278	0.223706	0.478541	0.429841	SYT4	1
GO:2000311	regulation of AMPA receptor activity	1/183	21/15278	0.223706	0.478541	0.429841	ARC	1
GO:0036293	response to decreased oxygen levels	6/183	340/15278	0.223708	0.478541	0.429841	PAM/RYR2/CITED2/ATF4/P4HB/CRYAB	6
GO:0009144	purine nucleoside triphosphate metabolic process	2/183	75/15278	0.226581	0.483984	0.43473	NME1/SAMHD1	2
GO:2000243	positive regulation of reproductive process	2/183	75/15278	0.226581	0.483984	0.43473	CITED2/ACVR1B	2
GO:0050920	regulation of chemotaxis	4/183	204/15278	0.22889	0.485096	0.435728	SEMA5A/SCG2/PLXNA4/CDH13	4
GO:0010675	regulation of cellular carbohydrate metabolic process	3/183	138/15278	0.229432	0.485096	0.435728	SIK1/ADCYAP1R1/SELENOS	3
GO:0090287	regulation of cellular response to growth factor stimulus	5/183	273/15278	0.229931	0.485096	0.435728	CITED1/SFRP4/AGT/CITED2/CD63	5
GO:0009314	response to radiation	7/183	415/15278	0.23055	0.485096	0.435728	SIK1/SLC7A11/FOS/COL3A1/ATF4/AEN/CRYAB	7
GO:0045638	negative regulation of myeloid cell differentiation	2/183	76/15278	0.231001	0.485096	0.435728	C1QC/NME1	2
GO:0060998	regulation of dendritic spine development	2/183	76/15278	0.231001	0.485096	0.435728	LRP8/ARC	2
GO:1903363	negative regulation of cellular protein catabolic process	2/183	76/15278	0.231001	0.485096	0.435728	ANXA2/PRKCG	2
GO:0010810	regulation of cell-substrate adhesion	4/183	205/15278	0.231448	0.485096	0.435728	CDH13/LGALS1/P4HB/COL1A1	4
GO:0043254	regulation of protein-containing complex assembly	7/183	416/15278	0.232315	0.485096	0.435728	LCP1/THRA/HSPA1B/ELN/GBA/FHOD3/CRYAB	7
GO:0002313	mature B cell differentiation involved in immune response	1/183	22/15278	0.233017	0.485096	0.435728	LGALS1	1
GO:0002438	acute inflammatory response to antigenic stimulus	1/183	22/15278	0.233017	0.485096	0.435728	SELENOS	1
GO:0003071	renal system process involved in regulation of systemic arterial blood pressure	1/183	22/15278	0.233017	0.485096	0.435728	AGT	1
GO:0009251	glucan catabolic process	1/183	22/15278	0.233017	0.485096	0.435728	PYGM	1
GO:0009309	amine biosynthetic process	1/183	22/15278	0.233017	0.485096	0.435728	SAT1	1
GO:0015813	L-glutamate transmembrane transport	1/183	22/15278	0.233017	0.485096	0.435728	SLC7A11	1
GO:0015874	norepinephrine transport	1/183	22/15278	0.233017	0.485096	0.435728	AGT	1
GO:0030325	adrenal gland development	1/183	22/15278	0.233017	0.485096	0.435728	CITED2	1
GO:0031629	synaptic vesicle fusion to presynaptic active zone membrane	1/183	22/15278	0.233017	0.485096	0.435728	SYT9	1
GO:0032098	regulation of appetite	1/183	22/15278	0.233017	0.485096	0.435728	NUCB2	1
GO:0032703	negative regulation of interleukin-2 production	1/183	22/15278	0.233017	0.485096	0.435728	VSIG4	1
GO:0032799	low-density lipoprotein receptor particle metabolic process	1/183	22/15278	0.233017	0.485096	0.435728	ANXA2	1
GO:0035024	negative regulation of Rho protein signal transduction	1/183	22/15278	0.233017	0.485096	0.435728	ADRA1A	1
GO:0035162	embryonic hemopoiesis	1/183	22/15278	0.233017	0.485096	0.435728	ATF4	1
GO:0035970	peptidyl-threonine dephosphorylation	1/183	22/15278	0.233017	0.485096	0.435728	DUSP9	1
GO:0042401	cellular biogenic amine biosynthetic process	1/183	22/15278	0.233017	0.485096	0.435728	SAT1	1
GO:0042537	benzene-containing compound metabolic process	1/183	22/15278	0.233017	0.485096	0.435728	AFMID	1
GO:0046039	GTP metabolic process	1/183	22/15278	0.233017	0.485096	0.435728	NME1	1
GO:0046058	cAMP metabolic process	1/183	22/15278	0.233017	0.485096	0.435728	ADCY8	1
GO:0048799	animal organ maturation	1/183	22/15278	0.233017	0.485096	0.435728	RET	1
GO:0050995	negative regulation of lipid catabolic process	1/183	22/15278	0.233017	0.485096	0.435728	MFSD2A	1
GO:0051457	maintenance of protein location in nucleus	1/183	22/15278	0.233017	0.485096	0.435728	RANGAP1	1
GO:0060479	lung cell differentiation	1/183	22/15278	0.233017	0.485096	0.435728	THRA	1
GO:0071218	cellular response to misfolded protein	1/183	22/15278	0.233017	0.485096	0.435728	SDF2L1	1
GO:0086064	cell communication by electrical coupling involved in cardiac conduction	1/183	22/15278	0.233017	0.485096	0.435728	RYR2	1
GO:1900746	regulation of vascular endothelial growth factor signaling pathway	1/183	22/15278	0.233017	0.485096	0.435728	CD63	1
GO:1903429	regulation of cell maturation	1/183	22/15278	0.233017	0.485096	0.435728	RET	1
GO:0010507	negative regulation of autophagy	2/183	77/15278	0.235428	0.48805	0.438381	CTSA/ADRA1A	2
GO:0034103	regulation of tissue remodeling	2/183	77/15278	0.235428	0.48805	0.438381	SPP1/AGT	2
GO:0048644	muscle organ morphogenesis	2/183	77/15278	0.235428	0.48805	0.438381	COL3A1/RYR2	2
GO:0048864	stem cell development	2/183	77/15278	0.235428	0.48805	0.438381	SEMA5A/RET	2
GO:0051057	positive regulation of small GTPase mediated signal transduction	2/183	77/15278	0.235428	0.48805	0.438381	COL3A1/ADCYAP1R1	2
GO:0070542	response to fatty acid	2/183	77/15278	0.235428	0.48805	0.438381	ASS1/NME1	2
GO:0097696	receptor signaling pathway via STAT	3/183	140/15278	0.23577	0.488416	0.438711	RET/AGT/PTPRT	3
GO:0002791	regulation of peptide secretion	6/183	348/15278	0.239285	0.491089	0.441111	PAM/SYT9/MYRIP/ADCY8/ERP29/SYT4	6
GO:0034109	homotypic cell-cell adhesion	2/183	78/15278	0.239859	0.491089	0.441111	SLC7A11/LGALS1	2
GO:2000106	regulation of leukocyte apoptotic process	2/183	78/15278	0.239859	0.491089	0.441111	SLC7A11/SELENOS	2
GO:0072001	renal system development	5/183	278/15278	0.240964	0.491089	0.441111	CITED1/RET/AGT/HEYL/ASS1	5
GO:0002831	regulation of response to biotic stimulus	6/183	349/15278	0.241256	0.491089	0.441111	VSIG4/FGL2/KLK7/LRP8/SAMHD1/RNF216	6
GO:1902532	negative regulation of intracellular signal transduction	8/183	494/15278	0.241321	0.491089	0.441111	DGKG/DUSP9/AGT/C1QL4/OPRL1/GBA/SELENOS/ADRA1A	8
GO:0002861	regulation of inflammatory response to antigenic stimulus	1/183	23/15278	0.242217	0.491089	0.441111	SELENOS	1
GO:0006688	glycosphingolipid biosynthetic process	1/183	23/15278	0.242217	0.491089	0.441111	ST6GALNAC5	1
GO:0007274	neuromuscular synaptic transmission	1/183	23/15278	0.242217	0.491089	0.441111	ETV5	1
GO:0007413	axonal fasciculation	1/183	23/15278	0.242217	0.491089	0.441111	SEMA5A	1
GO:0016578	histone deubiquitination	1/183	23/15278	0.242217	0.491089	0.441111	USP22	1
GO:0032925	regulation of activin receptor signaling pathway	1/183	23/15278	0.242217	0.491089	0.441111	ACVR1B	1
GO:0034505	tooth mineralization	1/183	23/15278	0.242217	0.491089	0.441111	COL1A1	1
GO:0035268	protein mannosylation	1/183	23/15278	0.242217	0.491089	0.441111	SDF2L1	1
GO:0043501	skeletal muscle adaptation	1/183	23/15278	0.242217	0.491089	0.441111	IGFBP5	1
GO:0043951	negative regulation of cAMP-mediated signaling	1/183	23/15278	0.242217	0.491089	0.441111	OPRL1	1
GO:0044247	cellular polysaccharide catabolic process	1/183	23/15278	0.242217	0.491089	0.441111	PYGM	1
GO:0045606	positive regulation of epidermal cell differentiation	1/183	23/15278	0.242217	0.491089	0.441111	SFRP4	1
GO:0045822	negative regulation of heart contraction	1/183	23/15278	0.242217	0.491089	0.441111	ADRA1A	1
GO:0046628	positive regulation of insulin receptor signaling pathway	1/183	23/15278	0.242217	0.491089	0.441111	AGT	1
GO:0048261	negative regulation of receptor-mediated endocytosis	1/183	23/15278	0.242217	0.491089	0.441111	DLG4	1
GO:0048745	smooth muscle tissue development	1/183	23/15278	0.242217	0.491089	0.441111	COL3A1	1
GO:0051350	negative regulation of lyase activity	1/183	23/15278	0.242217	0.491089	0.441111	GABBR2	1
GO:0060444	branching involved in mammary gland duct morphogenesis	1/183	23/15278	0.242217	0.491089	0.441111	ETV5	1
GO:0070841	inclusion body assembly	1/183	23/15278	0.242217	0.491089	0.441111	HSPA1B	1
GO:0090208	positive regulation of triglyceride metabolic process	1/183	23/15278	0.242217	0.491089	0.441111	MFSD2A	1
GO:0099500	vesicle fusion to plasma membrane	1/183	23/15278	0.242217	0.491089	0.441111	SYT9	1
GO:0106030	neuron projection fasciculation	1/183	23/15278	0.242217	0.491089	0.441111	SEMA5A	1
GO:1900273	positive regulation of long-term synaptic potentiation	1/183	23/15278	0.242217	0.491089	0.441111	ADCY8	1
GO:1902993	positive regulation of amyloid precursor protein catabolic process	1/183	23/15278	0.242217	0.491089	0.441111	EFNA3	1
GO:2000050	regulation of non-canonical Wnt signaling pathway	1/183	23/15278	0.242217	0.491089	0.441111	SFRP4	1
GO:0042692	muscle cell differentiation	6/183	350/15278	0.243231	0.492806	0.442654	SIK1/IGFBP5/AGT/PGM5/FHOD3/ADRA1A	6
GO:0030193	regulation of blood coagulation	2/183	79/15278	0.244294	0.494281	0.443979	ANXA2/VKORC1	2
GO:0051262	protein tetramerization	2/183	79/15278	0.244294	0.494281	0.443979	B2M/SAMHD1	2
GO:0048813	dendrite morphogenesis	3/183	143/15278	0.245334	0.495028	0.44465	LRP8/DLG4/ARC	3
GO:0055123	digestive system development	3/183	143/15278	0.245334	0.495028	0.44465	COL3A1/RET/ASS1	3
GO:0090263	positive regulation of canonical Wnt signaling pathway	3/183	143/15278	0.245334	0.495028	0.44465	SEMA5A/SFRP4/COL1A1	3
GO:1903169	regulation of calcium ion transmembrane transport	3/183	143/15278	0.245334	0.495028	0.44465	RYR2/CRHR1/OPRL1	3
GO:0048705	skeletal system morphogenesis	4/183	211/15278	0.246937	0.495896	0.445429	SFRP4/COL1A1/THRA/ACAN	4
GO:0048762	mesenchymal cell differentiation	4/183	211/15278	0.246937	0.495896	0.445429	SEMA5A/RET/HEYL/COL1A1	4
GO:0003012	muscle system process	7/183	425/15278	0.248405	0.495896	0.445429	ADRA1B/IGFBP5/CHRM2/AGT/RYR2/CRYAB/ADRA1A	7
GO:0048754	branching morphogenesis of an epithelial tube	3/183	144/15278	0.248536	0.495896	0.445429	ETV5/CITED1/AGT	3
GO:0006112	energy reserve metabolic process	2/183	80/15278	0.248733	0.495896	0.445429	PYGM/SELENOS	2
GO:0050709	negative regulation of protein secretion	2/183	80/15278	0.248733	0.495896	0.445429	ERP29/SYT4	2
GO:1900046	regulation of hemostasis	2/183	80/15278	0.248733	0.495896	0.445429	ANXA2/VKORC1	2
GO:1903351	cellular response to dopamine	2/183	80/15278	0.248733	0.495896	0.445429	CHRM2/ATF4	2
GO:0002021	response to dietary excess	1/183	24/15278	0.251308	0.495896	0.445429	VGF	1
GO:0003181	atrioventricular valve morphogenesis	1/183	24/15278	0.251308	0.495896	0.445429	HEYL	1
GO:0003272	endocardial cushion formation	1/183	24/15278	0.251308	0.495896	0.445429	HEYL	1
GO:0008209	androgen metabolic process	1/183	24/15278	0.251308	0.495896	0.445429	SPP1	1
GO:0010447	response to acidic pH	1/183	24/15278	0.251308	0.495896	0.445429	CTSS	1
GO:0015949	nucleobase-containing small molecule interconversion	1/183	24/15278	0.251308	0.495896	0.445429	NME1	1
GO:0021544	subpallium development	1/183	24/15278	0.251308	0.495896	0.445429	SLC7A11	1
GO:0021895	cerebral cortex neuron differentiation	1/183	24/15278	0.251308	0.495896	0.445429	CHD5	1
GO:0021952	central nervous system projection neuron axonogenesis	1/183	24/15278	0.251308	0.495896	0.445429	PLXNA4	1
GO:0032366	intracellular sterol transport	1/183	24/15278	0.251308	0.495896	0.445429	ANXA2	1
GO:0032367	intracellular cholesterol transport	1/183	24/15278	0.251308	0.495896	0.445429	ANXA2	1
GO:0032528	microvillus organization	1/183	24/15278	0.251308	0.495896	0.445429	RAP1GAP	1
GO:0035640	exploration behavior	1/183	24/15278	0.251308	0.495896	0.445429	DLG4	1
GO:0035902	response to immobilization stress	1/183	24/15278	0.251308	0.495896	0.445429	FOS	1
GO:0036003	positive regulation of transcription from RNA polymerase II promoter in response to stress	1/183	24/15278	0.251308	0.495896	0.445429	ATF4	1
GO:0036315	cellular response to sterol	1/183	24/15278	0.251308	0.495896	0.445429	LRP8	1
GO:0042430	indole-containing compound metabolic process	1/183	24/15278	0.251308	0.495896	0.445429	AFMID	1
GO:0043171	peptide catabolic process	1/183	24/15278	0.251308	0.495896	0.445429	CHAC1	1
GO:0043567	regulation of insulin-like growth factor receptor signaling pathway	1/183	24/15278	0.251308	0.495896	0.445429	IGFBP5	1
GO:0051123	RNA polymerase II preinitiation complex assembly	1/183	24/15278	0.251308	0.495896	0.445429	THRA	1
GO:0051788	response to misfolded protein	1/183	24/15278	0.251308	0.495896	0.445429	SDF2L1	1
GO:0060561	apoptotic process involved in morphogenesis	1/183	24/15278	0.251308	0.495896	0.445429	CRYAB	1
GO:0061217	regulation of mesonephros development	1/183	24/15278	0.251308	0.495896	0.445429	AGT	1
GO:0072273	metanephric nephron morphogenesis	1/183	24/15278	0.251308	0.495896	0.445429	CITED1	1
GO:1902547	regulation of cellular response to vascular endothelial growth factor stimulus	1/183	24/15278	0.251308	0.495896	0.445429	CD63	1
GO:0030203	glycosaminoglycan metabolic process	3/183	145/15278	0.251745	0.496095	0.445608	FUCA1/ACAN/GLCE	3
GO:0098739	import across plasma membrane	3/183	145/15278	0.251745	0.496095	0.445608	SLC7A11/AGT/SLC3A2	3
GO:0097305	response to alcohol	4/183	213/15278	0.252152	0.496565	0.446031	FOS/ADCYAP1R1/LRP8/ADCY8	4
GO:0001942	hair follicle development	2/183	81/15278	0.253174	0.496921	0.44635	IGFBP5/ACVR1B	2
GO:0050886	endocrine process	2/183	81/15278	0.253174	0.496921	0.44635	AGT/CRHR1	2
GO:0097306	cellular response to alcohol	2/183	81/15278	0.253174	0.496921	0.44635	LRP8/ADCY8	2
GO:0140029	exocytic process	2/183	81/15278	0.253174	0.496921	0.44635	SYT9/UNC13A	2
GO:1903350	response to dopamine	2/183	81/15278	0.253174	0.496921	0.44635	CHRM2/ATF4	2
GO:0032869	cellular response to insulin stimulus	4/183	214/15278	0.254768	0.498621	0.447877	AGT/ATP6V0B/SELENOS/ECHDC3	4
GO:0051092	positive regulation of NF-kappaB transcription factor activity	3/183	146/15278	0.25496	0.498621	0.447877	CAMK2A/AGT/HSPA1B	3
GO:0098657	import into cell	4/183	215/15278	0.257389	0.498621	0.447877	SLC7A11/AGT/SLC3A2/ARC	4
GO:0043087	regulation of GTPase activity	7/183	430/15278	0.257491	0.498621	0.447877	ARHGAP36/PLXNA4/RAP1GAP/RANGAP1/RASGRP3/RAP1GAP2/ADAP2	7
GO:0006029	proteoglycan metabolic process	2/183	82/15278	0.257617	0.498621	0.447877	ACAN/GLCE	2
GO:0014033	neural crest cell differentiation	2/183	82/15278	0.257617	0.498621	0.447877	SEMA5A/RET	2
GO:0032436	positive regulation of proteasomal ubiquitin-dependent protein catabolic process	2/183	82/15278	0.257617	0.498621	0.447877	HSPA1B/GBA	2
GO:0035418	protein localization to synapse	2/183	82/15278	0.257617	0.498621	0.447877	NRXN2/DLG4	2
GO:0050772	positive regulation of axonogenesis	2/183	82/15278	0.257617	0.498621	0.447877	SEMA5A/PLXNA4	2
GO:0010951	negative regulation of endopeptidase activity	4/183	216/15278	0.260016	0.498621	0.447877	ANXA2/AGT/SERPINB10/CRYAB	4
GO:0000188	inactivation of MAPK activity	1/183	25/15278	0.260289	0.498621	0.447877	DUSP9	1
GO:0000272	polysaccharide catabolic process	1/183	25/15278	0.260289	0.498621	0.447877	PYGM	1
GO:0001958	endochondral ossification	1/183	25/15278	0.260289	0.498621	0.447877	COL1A1	1
GO:0010882	regulation of cardiac muscle contraction by calcium ion signaling	1/183	25/15278	0.260289	0.498621	0.447877	RYR2	1
GO:0010955	negative regulation of protein processing	1/183	25/15278	0.260289	0.498621	0.447877	CHAC1	1
GO:0010996	response to auditory stimulus	1/183	25/15278	0.260289	0.498621	0.447877	NRXN2	1
GO:0014829	vascular associated smooth muscle contraction	1/183	25/15278	0.260289	0.498621	0.447877	AGT	1
GO:0015012	heparan sulfate proteoglycan biosynthetic process	1/183	25/15278	0.260289	0.498621	0.447877	GLCE	1
GO:0031579	membrane raft organization	1/183	25/15278	0.260289	0.498621	0.447877	ANXA2	1
GO:0034311	diol metabolic process	1/183	25/15278	0.260289	0.498621	0.447877	GBA	1
GO:0034368	protein-lipid complex remodeling	1/183	25/15278	0.260289	0.498621	0.447877	AGT	1
GO:0034369	plasma lipoprotein particle remodeling	1/183	25/15278	0.260289	0.498621	0.447877	AGT	1
GO:0036075	replacement ossification	1/183	25/15278	0.260289	0.498621	0.447877	COL1A1	1
GO:0042044	fluid transport	1/183	25/15278	0.260289	0.498621	0.447877	SLC14A1	1
GO:0042219	cellular modified amino acid catabolic process	1/183	25/15278	0.260289	0.498621	0.447877	CHAC1	1
GO:0042730	fibrinolysis	1/183	25/15278	0.260289	0.498621	0.447877	ANXA2	1
GO:0044788	modulation by host of viral process	1/183	25/15278	0.260289	0.498621	0.447877	PPIB	1
GO:0045922	negative regulation of fatty acid metabolic process	1/183	25/15278	0.260289	0.498621	0.447877	MFSD2A	1
GO:0046339	diacylglycerol metabolic process	1/183	25/15278	0.260289	0.498621	0.447877	DGKG	1
GO:0046697	decidualization	1/183	25/15278	0.260289	0.498621	0.447877	SPP1	1
GO:0048143	astrocyte activation	1/183	25/15278	0.260289	0.498621	0.447877	C1QA	1
GO:0048843	negative regulation of axon extension involved in axon guidance	1/183	25/15278	0.260289	0.498621	0.447877	SEMA5A	1
GO:0050687	negative regulation of defense response to virus	1/183	25/15278	0.260289	0.498621	0.447877	FGL2	1
GO:0060765	regulation of androgen receptor signaling pathway	1/183	25/15278	0.260289	0.498621	0.447877	HEYL	1
GO:0072202	cell differentiation involved in metanephros development	1/183	25/15278	0.260289	0.498621	0.447877	CITED1	1
GO:1901380	negative regulation of potassium ion transmembrane transport	1/183	25/15278	0.260289	0.498621	0.447877	KCNAB1	1
GO:1903318	negative regulation of protein maturation	1/183	25/15278	0.260289	0.498621	0.447877	CHAC1	1
GO:0055067	monovalent inorganic cation homeostasis	3/183	148/15278	0.261406	0.499101	0.448308	AGT/ATP6V0B/SLC4A8	3
GO:0022404	molting cycle process	2/183	83/15278	0.262062	0.499101	0.448308	IGFBP5/ACVR1B	2
GO:0022405	hair cycle process	2/183	83/15278	0.262062	0.499101	0.448308	IGFBP5/ACVR1B	2
GO:0032092	positive regulation of protein binding	2/183	83/15278	0.262062	0.499101	0.448308	ANXA2/B2M	2
GO:0051453	regulation of intracellular pH	2/183	83/15278	0.262062	0.499101	0.448308	ATP6V0B/SLC4A8	2
GO:0051817	modulation of process of other organism involved in symbiotic interaction	2/183	83/15278	0.262062	0.499101	0.448308	PPIB/ANXA2	2
GO:0060291	long-term synaptic potentiation	2/183	83/15278	0.262062	0.499101	0.448308	ADCY8/ARC	2
GO:1903035	negative regulation of response to wounding	2/183	83/15278	0.262062	0.499101	0.448308	SPP1/ANXA2	2
GO:1903321	negative regulation of protein modification by small protein conjugation or removal	2/183	83/15278	0.262062	0.499101	0.448308	PRKCG/HSPA1B	2
GO:0043547	positive regulation of GTPase activity	6/183	360/15278	0.263241	0.501023	0.450034	ARHGAP36/RAP1GAP/RANGAP1/RASGRP3/RAP1GAP2/ADAP2	6
GO:0001936	regulation of endothelial cell proliferation	3/183	149/15278	0.264638	0.502258	0.451144	SEMA5A/SCG2/CDH13	3
GO:0009408	response to heat	3/183	149/15278	0.264638	0.502258	0.451144	CAMK2A/HSPA1B/CRYAB	3
GO:0060402	calcium ion transport into cytosol	3/183	149/15278	0.264638	0.502258	0.451144	ADCYAP1R1/RYR2/ADRA1A	3
GO:0009798	axis specification	2/183	84/15278	0.266507	0.502258	0.451144	CITED1/CITED2	2
GO:0019886	antigen processing and presentation of exogenous peptide antigen via MHC class II	2/183	84/15278	0.266507	0.502258	0.451144	HLA-DQB1/CTSS	2
GO:0045069	regulation of viral genome replication	2/183	84/15278	0.266507	0.502258	0.451144	PPIB/BTBD17	2
GO:0045445	myoblast differentiation	2/183	84/15278	0.266507	0.502258	0.451144	KCNAB1/LGALS1	2
GO:0045833	negative regulation of lipid metabolic process	2/183	84/15278	0.266507	0.502258	0.451144	SIK1/MFSD2A	2
GO:0098773	skin epidermis development	2/183	84/15278	0.266507	0.502258	0.451144	IGFBP5/ACVR1B	2
GO:0002478	antigen processing and presentation of exogenous peptide antigen	3/183	150/15278	0.267874	0.502258	0.451144	B2M/HLA-DQB1/CTSS	3
GO:0003081	regulation of systemic arterial blood pressure by renin-angiotensin	1/183	26/15278	0.269164	0.502258	0.451144	AGT	1
GO:0003171	atrioventricular valve development	1/183	26/15278	0.269164	0.502258	0.451144	HEYL	1
GO:0006706	steroid catabolic process	1/183	26/15278	0.269164	0.502258	0.451144	SPP1	1
GO:0007020	microtubule nucleation	1/183	26/15278	0.269164	0.502258	0.451144	HSPA1B	1
GO:0007628	adult walking behavior	1/183	26/15278	0.269164	0.502258	0.451144	KLHL1	1
GO:0009065	glutamine family amino acid catabolic process	1/183	26/15278	0.269164	0.502258	0.451144	ASRGL1	1
GO:0018146	keratan sulfate biosynthetic process	1/183	26/15278	0.269164	0.502258	0.451144	ACAN	1
GO:0030318	melanocyte differentiation	1/183	26/15278	0.269164	0.502258	0.451144	CITED1	1
GO:0031069	hair follicle morphogenesis	1/183	26/15278	0.269164	0.502258	0.451144	IGFBP5	1
GO:0033561	regulation of water loss via skin	1/183	26/15278	0.269164	0.502258	0.451144	GBA	1
GO:0034110	regulation of homotypic cell-cell adhesion	1/183	26/15278	0.269164	0.502258	0.451144	LGALS1	1
GO:0034367	protein-containing complex remodeling	1/183	26/15278	0.269164	0.502258	0.451144	AGT	1
GO:0043153	entrainment of circadian clock by photoperiod	1/183	26/15278	0.269164	0.502258	0.451144	SIK1	1
GO:0045672	positive regulation of osteoclast differentiation	1/183	26/15278	0.269164	0.502258	0.451144	FOS	1
GO:0048679	regulation of axon regeneration	1/183	26/15278	0.269164	0.502258	0.451144	SPP1	1
GO:0051953	negative regulation of amine transport	1/183	26/15278	0.269164	0.502258	0.451144	SYT4	1
GO:0055083	monovalent inorganic anion homeostasis	1/183	26/15278	0.269164	0.502258	0.451144	SFRP4	1
GO:0060343	trabecula formation	1/183	26/15278	0.269164	0.502258	0.451144	COL1A1	1
GO:0070076	histone lysine demethylation	1/183	26/15278	0.269164	0.502258	0.451144	HR	1
GO:0090383	phagosome acidification	1/183	26/15278	0.269164	0.502258	0.451144	ATP6V0B	1
GO:0098664	G protein-coupled serotonin receptor signaling pathway	1/183	26/15278	0.269164	0.502258	0.451144	CHRM2	1
GO:0044242	cellular lipid catabolic process	4/183	220/15278	0.270576	0.503671	0.452413	GLA/FUCA1/MFSD2A/GBA	4
GO:0001656	metanephros development	2/183	85/15278	0.270952	0.503671	0.452413	CITED1/RET	2
GO:0014812	muscle cell migration	2/183	85/15278	0.270952	0.503671	0.452413	IGFBP5/AGT	2
GO:0045185	maintenance of protein location	2/183	85/15278	0.270952	0.503671	0.452413	RANGAP1/KDELR2	2
GO:0050773	regulation of dendrite development	3/183	151/15278	0.271116	0.503671	0.452413	MFSD2A/LRP8/ARC	3
GO:0052126	movement in host environment	3/183	151/15278	0.271116	0.503671	0.452413	LGALS1/P4HB/HSPA1B	3
GO:2001242	regulation of intrinsic apoptotic signaling pathway	3/183	151/15278	0.271116	0.503671	0.452413	P4HB/SELENOS/ERP29	3
GO:0150063	visual system development	6/183	364/15278	0.271365	0.503816	0.452544	SLC7A11/RET/C1QA/MFSD2A/ATF4/CRYAB	6
GO:0009615	response to virus	5/183	292/15278	0.27257	0.504587	0.453236	FGL2/CHRM2/BTBD17/SAMHD1/RNF216	5
GO:0002792	negative regulation of peptide secretion	2/183	86/15278	0.275396	0.504587	0.453236	ERP29/SYT4	2
GO:0033273	response to vitamin	2/183	86/15278	0.275396	0.504587	0.453236	SPP1/COL1A1	2
GO:0042058	regulation of epidermal growth factor receptor signaling pathway	2/183	86/15278	0.275396	0.504587	0.453236	AGT/CDH13	2
GO:0048013	ephrin receptor signaling pathway	2/183	86/15278	0.275396	0.504587	0.453236	ARHGEF28/EFNA3	2
GO:0060349	bone morphogenesis	2/183	86/15278	0.275396	0.504587	0.453236	SFRP4/COL1A1	2
GO:1905954	positive regulation of lipid localization	2/183	86/15278	0.275396	0.504587	0.453236	SPP1/ANXA2	2
GO:0006469	negative regulation of protein kinase activity	4/183	222/15278	0.275885	0.504587	0.453236	DUSP9/AGT/PTPRT/GBA	4
GO:0001914	regulation of T cell mediated cytotoxicity	1/183	27/15278	0.277933	0.504587	0.453236	B2M	1
GO:0006735	NADH regeneration	1/183	27/15278	0.277933	0.504587	0.453236	ALDOC	1
GO:0007143	female meiotic nuclear division	1/183	27/15278	0.277933	0.504587	0.453236	MARF1	1
GO:0007263	nitric oxide mediated signal transduction	1/183	27/15278	0.277933	0.504587	0.453236	AGT	1
GO:0010880	regulation of release of sequestered calcium ion into cytosol by sarcoplasmic reticulum	1/183	27/15278	0.277933	0.504587	0.453236	RYR2	1
GO:0014912	negative regulation of smooth muscle cell migration	1/183	27/15278	0.277933	0.504587	0.453236	IGFBP5	1
GO:0016577	histone demethylation	1/183	27/15278	0.277933	0.504587	0.453236	HR	1
GO:0018126	protein hydroxylation	1/183	27/15278	0.277933	0.504587	0.453236	P4HB	1
GO:0019098	reproductive behavior	1/183	27/15278	0.277933	0.504587	0.453236	THRA	1
GO:0021602	cranial nerve morphogenesis	1/183	27/15278	0.277933	0.504587	0.453236	PLXNA4	1
GO:0030970	retrograde protein transport, ER to cytosol	1/183	27/15278	0.277933	0.504587	0.453236	SELENOS	1
GO:0032373	positive regulation of sterol transport	1/183	27/15278	0.277933	0.504587	0.453236	ANXA2	1
GO:0032376	positive regulation of cholesterol transport	1/183	27/15278	0.277933	0.504587	0.453236	ANXA2	1
GO:0035767	endothelial cell chemotaxis	1/183	27/15278	0.277933	0.504587	0.453236	SEMA5A	1
GO:0036296	response to increased oxygen levels	1/183	27/15278	0.277933	0.504587	0.453236	COL1A1	1
GO:0048668	collateral sprouting	1/183	27/15278	0.277933	0.504587	0.453236	SPP1	1
GO:0055094	response to lipoprotein particle	1/183	27/15278	0.277933	0.504587	0.453236	CDH13	1
GO:0060351	cartilage development involved in endochondral bone morphogenesis	1/183	27/15278	0.277933	0.504587	0.453236	COL1A1	1
GO:0061621	canonical glycolysis	1/183	27/15278	0.277933	0.504587	0.453236	ALDOC	1
GO:0061718	glucose catabolic process to pyruvate	1/183	27/15278	0.277933	0.504587	0.453236	ALDOC	1
GO:0070723	response to cholesterol	1/183	27/15278	0.277933	0.504587	0.453236	LRP8	1
GO:0099590	neurotransmitter receptor internalization	1/183	27/15278	0.277933	0.504587	0.453236	ARC	1
GO:0120033	negative regulation of plasma membrane bounded cell projection assembly	1/183	27/15278	0.277933	0.504587	0.453236	RAP1GAP	1
GO:1902175	regulation of oxidative stress-induced intrinsic apoptotic signaling pathway	1/183	27/15278	0.277933	0.504587	0.453236	P4HB	1
GO:1902668	negative regulation of axon guidance	1/183	27/15278	0.277933	0.504587	0.453236	SEMA5A	1
GO:1902932	positive regulation of alcohol biosynthetic process	1/183	27/15278	0.277933	0.504587	0.453236	ADCYAP1R1	1
GO:1903513	endoplasmic reticulum to cytosol transport	1/183	27/15278	0.277933	0.504587	0.453236	SELENOS	1
GO:2000463	positive regulation of excitatory postsynaptic potential	1/183	27/15278	0.277933	0.504587	0.453236	DLG4	1
GO:0055017	cardiac muscle tissue growth	2/183	87/15278	0.27984	0.507736	0.456064	AGT/ADRA1A	2
GO:0048880	sensory system development	6/183	369/15278	0.281606	0.510627	0.458661	SLC7A11/RET/C1QA/MFSD2A/ATF4/CRYAB	6
GO:0070588	calcium ion transmembrane transport	5/183	297/15278	0.284073	0.5112	0.459176	ANXA2/RYR2/CRHR1/SLC24A3/OPRL1	5
GO:0051100	negative regulation of binding	3/183	155/15278	0.284122	0.5112	0.459176	B2M/ZNF593/TLE5	3
GO:0002495	antigen processing and presentation of peptide antigen via MHC class II	2/183	88/15278	0.284281	0.5112	0.459176	HLA-DQB1/CTSS	2
GO:0035821	modulation of process of other organism	2/183	88/15278	0.284281	0.5112	0.459176	PPIB/ANXA2	2
GO:0060993	kidney morphogenesis	2/183	88/15278	0.284281	0.5112	0.459176	CITED1/AGT	2
GO:0002063	chondrocyte development	1/183	28/15278	0.286597	0.5112	0.459176	ACAN	1
GO:0002335	mature B cell differentiation	1/183	28/15278	0.286597	0.5112	0.459176	LGALS1	1
GO:0006515	protein quality control for misfolded or incompletely synthesized proteins	1/183	28/15278	0.286597	0.5112	0.459176	SDF2L1	1
GO:0007205	protein kinase C-activating G protein-coupled receptor signaling pathway	1/183	28/15278	0.286597	0.5112	0.459176	DGKG	1
GO:0009435	NAD biosynthetic process	1/183	28/15278	0.286597	0.5112	0.459176	AFMID	1
GO:0010575	positive regulation of vascular endothelial growth factor production	1/183	28/15278	0.286597	0.5112	0.459176	ATF4	1
GO:0010743	regulation of macrophage derived foam cell differentiation	1/183	28/15278	0.286597	0.5112	0.459176	AGT	1
GO:0018200	peptidyl-glutamic acid modification	1/183	28/15278	0.286597	0.5112	0.459176	VKORC1	1
GO:0021680	cerebellar Purkinje cell layer development	1/183	28/15278	0.286597	0.5112	0.459176	KLHL1	1
GO:0031116	positive regulation of microtubule polymerization	1/183	28/15278	0.286597	0.5112	0.459176	HSPA1B	1
GO:0032958	inositol phosphate biosynthetic process	1/183	28/15278	0.286597	0.5112	0.459176	ADCYAP1R1	1
GO:0034390	smooth muscle cell apoptotic process	1/183	28/15278	0.286597	0.5112	0.459176	ATF4	1
GO:0034391	regulation of smooth muscle cell apoptotic process	1/183	28/15278	0.286597	0.5112	0.459176	ATF4	1
GO:0048147	negative regulation of fibroblast proliferation	1/183	28/15278	0.286597	0.5112	0.459176	C1QL4	1
GO:0050690	regulation of defense response to virus by virus	1/183	28/15278	0.286597	0.5112	0.459176	B2M	1
GO:0051085	chaperone cofactor-dependent protein refolding	1/183	28/15278	0.286597	0.5112	0.459176	HSPA1B	1
GO:0051385	response to mineralocorticoid	1/183	28/15278	0.286597	0.5112	0.459176	FOS	1
GO:0061620	glycolytic process through glucose-6-phosphate	1/183	28/15278	0.286597	0.5112	0.459176	ALDOC	1
GO:0071276	cellular response to cadmium ion	1/183	28/15278	0.286597	0.5112	0.459176	FOS	1
GO:0090659	walking behavior	1/183	28/15278	0.286597	0.5112	0.459176	KLHL1	1
GO:0095500	acetylcholine receptor signaling pathway	1/183	28/15278	0.286597	0.5112	0.459176	CHRM2	1
GO:1904893	negative regulation of receptor signaling pathway via STAT	1/183	28/15278	0.286597	0.5112	0.459176	PTPRT	1
GO:0002504	antigen processing and presentation of peptide or polysaccharide antigen via MHC class II	2/183	89/15278	0.28872	0.514363	0.462017	HLA-DQB1/CTSS	2
GO:0002702	positive regulation of production of molecular mediator of immune response	2/183	89/15278	0.28872	0.514363	0.462017	B2M/KLK7	2
GO:0010498	proteasomal protein catabolic process	7/183	447/15278	0.289071	0.514654	0.462278	PRKCG/HSPA1B/RNF216/GBA/SELENOS/SDF2L1/FBXL16	7
GO:0010466	negative regulation of peptidase activity	4/183	227/15278	0.289231	0.514654	0.462278	ANXA2/AGT/SERPINB10/CRYAB	4
GO:0006022	aminoglycan metabolic process	3/183	157/15278	0.290646	0.515872	0.463372	FUCA1/ACAN/GLCE	3
GO:0006470	protein dephosphorylation	5/183	300/15278	0.29102	0.515872	0.463372	DUSP9/PTPRN/PTPRT/PPP1R15B/GBA	5
GO:0019058	viral life cycle	5/183	300/15278	0.29102	0.515872	0.463372	PPIB/LGALS1/P4HB/BTBD17/HSPA1B	5
GO:0090092	regulation of transmembrane receptor protein serine/threonine kinase signaling pathway	4/183	228/15278	0.291912	0.515872	0.463372	CITED1/SFRP4/CITED2/ACVR1B	4
GO:0009100	glycoprotein metabolic process	6/183	374/15278	0.291934	0.515872	0.463372	ST6GALNAC5/RPN2/ACAN/GLCE/PRKCSH/SDF2L1	6
GO:0030641	regulation of cellular pH	2/183	90/15278	0.293155	0.515872	0.463372	ATP6V0B/SLC4A8	2
GO:0043648	dicarboxylic acid metabolic process	2/183	90/15278	0.293155	0.515872	0.463372	SLC7A11/ASS1	2
GO:0072599	establishment of protein localization to endoplasmic reticulum	2/183	90/15278	0.293155	0.515872	0.463372	SSR3/RYR2	2
GO:2000379	positive regulation of reactive oxygen species metabolic process	2/183	90/15278	0.293155	0.515872	0.463372	AGT/ASS1	2
GO:0019884	antigen processing and presentation of exogenous antigen	3/183	158/15278	0.293912	0.515872	0.463372	B2M/HLA-DQB1/CTSS	3
GO:0043542	endothelial cell migration	4/183	229/15278	0.294596	0.515872	0.463372	SEMA5A/SCG2/AGT/CDH13	4
GO:0002724	regulation of T cell cytokine production	1/183	29/15278	0.295158	0.515872	0.463372	B2M	1
GO:0005979	regulation of glycogen biosynthetic process	1/183	29/15278	0.295158	0.515872	0.463372	SELENOS	1
GO:0006482	protein demethylation	1/183	29/15278	0.295158	0.515872	0.463372	HR	1
GO:0006891	intra-Golgi vesicle-mediated transport	1/183	29/15278	0.295158	0.515872	0.463372	RAB6B	1
GO:0008214	protein dealkylation	1/183	29/15278	0.295158	0.515872	0.463372	HR	1
GO:0009394	2'-deoxyribonucleotide metabolic process	1/183	29/15278	0.295158	0.515872	0.463372	SAMHD1	1
GO:0010644	cell communication by electrical coupling	1/183	29/15278	0.295158	0.515872	0.463372	RYR2	1
GO:0010962	regulation of glucan biosynthetic process	1/183	29/15278	0.295158	0.515872	0.463372	SELENOS	1
GO:0014808	release of sequestered calcium ion into cytosol by sarcoplasmic reticulum	1/183	29/15278	0.295158	0.515872	0.463372	RYR2	1
GO:0018149	peptide cross-linking	1/183	29/15278	0.295158	0.515872	0.463372	COL3A1	1
GO:0036474	cell death in response to hydrogen peroxide	1/183	29/15278	0.295158	0.515872	0.463372	RNF112	1
GO:0040018	positive regulation of multicellular organism growth	1/183	29/15278	0.295158	0.515872	0.463372	PPIB	1
GO:0045940	positive regulation of steroid metabolic process	1/183	29/15278	0.295158	0.515872	0.463372	AGT	1
GO:0045987	positive regulation of smooth muscle contraction	1/183	29/15278	0.295158	0.515872	0.463372	ADRA1A	1
GO:0061615	glycolytic process through fructose-6-phosphate	1/183	29/15278	0.295158	0.515872	0.463372	ALDOC	1
GO:0070570	regulation of neuron projection regeneration	1/183	29/15278	0.295158	0.515872	0.463372	SPP1	1
GO:0071402	cellular response to lipoprotein particle stimulus	1/183	29/15278	0.295158	0.515872	0.463372	CDH13	1
GO:0086019	cell-cell signaling involved in cardiac conduction	1/183	29/15278	0.295158	0.515872	0.463372	RYR2	1
GO:0098901	regulation of cardiac muscle cell action potential	1/183	29/15278	0.295158	0.515872	0.463372	RYR2	1
GO:0048771	tissue remodeling	3/183	159/15278	0.297181	0.519099	0.466271	SPP1/IGFBP5/AGT	3
GO:0062014	negative regulation of small molecule metabolic process	2/183	91/15278	0.297587	0.519502	0.466633	SIK1/MFSD2A	2
GO:0061025	membrane fusion	3/183	160/15278	0.300452	0.520788	0.467789	ANXA2/SYT9/SYT4	3
GO:0008585	female gonad development	2/183	92/15278	0.302015	0.520788	0.467789	PTPRN/VGF	2
GO:0030316	osteoclast differentiation	2/183	92/15278	0.302015	0.520788	0.467789	ANXA2/FOS	2
GO:0048814	regulation of dendrite morphogenesis	2/183	92/15278	0.302015	0.520788	0.467789	LRP8/ARC	2
GO:1901184	regulation of ERBB signaling pathway	2/183	92/15278	0.302015	0.520788	0.467789	AGT/CDH13	2
GO:1901617	organic hydroxy compound biosynthetic process	4/183	232/15278	0.302667	0.520788	0.467789	SLC7A11/CITED1/ADCYAP1R1/GBA	4
GO:0006213	pyrimidine nucleoside metabolic process	1/183	30/15278	0.303617	0.520788	0.467789	UCK2	1
GO:0006356	regulation of transcription by RNA polymerase I	1/183	30/15278	0.303617	0.520788	0.467789	ATF4	1
GO:0007210	serotonin receptor signaling pathway	1/183	30/15278	0.303617	0.520788	0.467789	CHRM2	1
GO:0009648	photoperiodism	1/183	30/15278	0.303617	0.520788	0.467789	SIK1	1
GO:0018279	protein N-linked glycosylation via asparagine	1/183	30/15278	0.303617	0.520788	0.467789	RPN2	1
GO:0021591	ventricular system development	1/183	30/15278	0.303617	0.520788	0.467789	SLC7A11	1
GO:0042755	eating behavior	1/183	30/15278	0.303617	0.520788	0.467789	OPRL1	1
GO:0045920	negative regulation of exocytosis	1/183	30/15278	0.303617	0.520788	0.467789	SYT4	1
GO:0046688	response to copper ion	1/183	30/15278	0.303617	0.520788	0.467789	PAM	1
GO:0048730	epidermis morphogenesis	1/183	30/15278	0.303617	0.520788	0.467789	IGFBP5	1
GO:0060251	regulation of glial cell proliferation	1/183	30/15278	0.303617	0.520788	0.467789	ETV5	1
GO:0060325	face morphogenesis	1/183	30/15278	0.303617	0.520788	0.467789	COL1A1	1
GO:0062208	positive regulation of pattern recognition receptor signaling pathway	1/183	30/15278	0.303617	0.520788	0.467789	HSPA1B	1
GO:0070670	response to interleukin-4	1/183	30/15278	0.303617	0.520788	0.467789	CITED1	1
GO:0071295	cellular response to vitamin	1/183	30/15278	0.303617	0.520788	0.467789	COL1A1	1
GO:0071480	cellular response to gamma radiation	1/183	30/15278	0.303617	0.520788	0.467789	CRYAB	1
GO:0071549	cellular response to dexamethasone stimulus	1/183	30/15278	0.303617	0.520788	0.467789	ASS1	1
GO:0098760	response to interleukin-7	1/183	30/15278	0.303617	0.520788	0.467789	P4HB	1
GO:0098761	cellular response to interleukin-7	1/183	30/15278	0.303617	0.520788	0.467789	P4HB	1
GO:1900181	negative regulation of protein localization to nucleus	1/183	30/15278	0.303617	0.520788	0.467789	CABP1	1
GO:1903514	release of sequestered calcium ion into cytosol by endoplasmic reticulum	1/183	30/15278	0.303617	0.520788	0.467789	RYR2	1
GO:1903792	negative regulation of anion transport	1/183	30/15278	0.303617	0.520788	0.467789	SFRP4	1
GO:1905144	response to acetylcholine	1/183	30/15278	0.303617	0.520788	0.467789	CHRM2	1
GO:1905145	cellular response to acetylcholine	1/183	30/15278	0.303617	0.520788	0.467789	CHRM2	1
GO:0009101	glycoprotein biosynthetic process	5/183	306/15278	0.305004	0.522864	0.469653	ST6GALNAC5/RPN2/ACAN/GLCE/SDF2L1	5
GO:0043473	pigmentation	2/183	93/15278	0.306439	0.523266	0.470014	CITED1/CD63	2
GO:0044264	cellular polysaccharide metabolic process	2/183	93/15278	0.306439	0.523266	0.470014	PYGM/SELENOS	2
GO:0006575	cellular modified amino acid metabolic process	3/183	162/15278	0.306999	0.523266	0.470014	SLC7A11/CHAC1/ASS1	3
GO:0002237	response to molecule of bacterial origin	5/183	307/15278	0.307345	0.523266	0.470014	CITED1/B2M/FOS/ASS1/SELENOS	5
GO:0071214	cellular response to abiotic stimulus	5/183	307/15278	0.307345	0.523266	0.470014	AGT/SLC38A2/ATF4/COL1A1/CRYAB	5
GO:0104004	cellular response to environmental stimulus	5/183	307/15278	0.307345	0.523266	0.470014	AGT/SLC38A2/ATF4/COL1A1/CRYAB	5
GO:0070085	glycosylation	4/183	234/15278	0.308062	0.523266	0.470014	ST6GALNAC5/RPN2/GBA/SDF2L1	4
GO:1903034	regulation of response to wounding	3/183	163/15278	0.310275	0.523266	0.470014	SPP1/ANXA2/VKORC1	3
GO:0002526	acute inflammatory response	2/183	94/15278	0.310857	0.523266	0.470014	ASS1/SELENOS	2
GO:0009116	nucleoside metabolic process	2/183	94/15278	0.310857	0.523266	0.470014	NME1/UCK2	2
GO:0010522	regulation of calcium ion transport into cytosol	2/183	94/15278	0.310857	0.523266	0.470014	ADCYAP1R1/RYR2	2
GO:0030516	regulation of axon extension	2/183	94/15278	0.310857	0.523266	0.470014	SEMA5A/PLXNA4	2
GO:0090277	positive regulation of peptide hormone secretion	2/183	94/15278	0.310857	0.523266	0.470014	MYRIP/ADCY8	2
GO:0001881	receptor recycling	1/183	31/15278	0.311975	0.523266	0.470014	ANXA2	1
GO:0003091	renal water homeostasis	1/183	31/15278	0.311975	0.523266	0.470014	ADCY8	1
GO:0003338	metanephros morphogenesis	1/183	31/15278	0.311975	0.523266	0.470014	CITED1	1
GO:0009649	entrainment of circadian clock	1/183	31/15278	0.311975	0.523266	0.470014	SIK1	1
GO:0018196	peptidyl-asparagine modification	1/183	31/15278	0.311975	0.523266	0.470014	RPN2	1
GO:0019359	nicotinamide nucleotide biosynthetic process	1/183	31/15278	0.311975	0.523266	0.470014	AFMID	1
GO:0019363	pyridine nucleotide biosynthetic process	1/183	31/15278	0.311975	0.523266	0.470014	AFMID	1
GO:0019692	deoxyribose phosphate metabolic process	1/183	31/15278	0.311975	0.523266	0.470014	SAMHD1	1
GO:0021955	central nervous system neuron axonogenesis	1/183	31/15278	0.311975	0.523266	0.470014	PLXNA4	1
GO:0030201	heparan sulfate proteoglycan metabolic process	1/183	31/15278	0.311975	0.523266	0.470014	GLCE	1
GO:0030431	sleep	1/183	31/15278	0.311975	0.523266	0.470014	FOS	1
GO:0031297	replication fork processing	1/183	31/15278	0.311975	0.523266	0.470014	SAMHD1	1
GO:0042311	vasodilation	1/183	31/15278	0.311975	0.523266	0.470014	AGT	1
GO:0042339	keratan sulfate metabolic process	1/183	31/15278	0.311975	0.523266	0.470014	ACAN	1
GO:0042554	superoxide anion generation	1/183	31/15278	0.311975	0.523266	0.470014	AGT	1
GO:0046320	regulation of fatty acid oxidation	1/183	31/15278	0.311975	0.523266	0.470014	MFSD2A	1
GO:0048384	retinoic acid receptor signaling pathway	1/183	31/15278	0.311975	0.523266	0.470014	CREM	1
GO:0051930	regulation of sensory perception of pain	1/183	31/15278	0.311975	0.523266	0.470014	OPRL1	1
GO:0060236	regulation of mitotic spindle organization	1/183	31/15278	0.311975	0.523266	0.470014	HSPA1B	1
GO:0060603	mammary gland duct morphogenesis	1/183	31/15278	0.311975	0.523266	0.470014	ETV5	1
GO:0061311	cell surface receptor signaling pathway involved in heart development	1/183	31/15278	0.311975	0.523266	0.470014	HEYL	1
GO:0070423	nucleotide-binding oligomerization domain containing signaling pathway	1/183	31/15278	0.311975	0.523266	0.470014	HSPA1B	1
GO:0090322	regulation of superoxide metabolic process	1/183	31/15278	0.311975	0.523266	0.470014	AGT	1
GO:0098801	regulation of renal system process	1/183	31/15278	0.311975	0.523266	0.470014	AGT	1
GO:0110111	negative regulation of animal organ morphogenesis	1/183	31/15278	0.311975	0.523266	0.470014	CITED1	1
GO:0050730	regulation of peptidyl-tyrosine phosphorylation	4/183	236/15278	0.313468	0.525018	0.471588	AGT/LRP8/DLG4/ADRA1A	4
GO:0007584	response to nutrient	3/183	164/15278	0.313553	0.525018	0.471588	SPP1/ASS1/COL1A1	3
GO:0051897	positive regulation of protein kinase B signaling	3/183	164/15278	0.313553	0.525018	0.471588	SEMA5A/IGFBP5/RET	3
GO:0002286	T cell activation involved in immune response	2/183	95/15278	0.315269	0.526938	0.473312	FGL2/LCP1	2
GO:0042116	macrophage activation	2/183	95/15278	0.315269	0.526938	0.473312	VSIG4/C1QA	2
GO:1990266	neutrophil migration	2/183	95/15278	0.315269	0.526938	0.473312	PPIB/GP2	2
GO:0060562	epithelial tube morphogenesis	5/183	311/15278	0.316735	0.526938	0.473312	ETV5/CITED1/RET/AGT/RYR2	5
GO:0003205	cardiac chamber development	3/183	165/15278	0.316831	0.526938	0.473312	RYR2/CITED2/HEYL	3
GO:0048002	antigen processing and presentation of peptide antigen	3/183	165/15278	0.316831	0.526938	0.473312	B2M/HLA-DQB1/CTSS	3
GO:0060759	regulation of response to cytokine stimulus	3/183	165/15278	0.316831	0.526938	0.473312	SAMHD1/HSPA1B/TLE5	3
GO:0043010	camera-type eye development	5/183	312/15278	0.319089	0.526938	0.473312	SLC7A11/RET/MFSD2A/ATF4/CRYAB	5
GO:0010771	negative regulation of cell morphogenesis involved in differentiation	2/183	96/15278	0.319675	0.526938	0.473312	SPP1/SEMA5A	2
GO:0036503	ERAD pathway	2/183	96/15278	0.319675	0.526938	0.473312	SELENOS/SDF2L1	2
GO:2000060	positive regulation of ubiquitin-dependent protein catabolic process	2/183	96/15278	0.319675	0.526938	0.473312	HSPA1B/GBA	2
GO:0035265	organ growth	3/183	166/15278	0.32011	0.526938	0.473312	DUSP9/AGT/ADRA1A	3
GO:0006298	mismatch repair	1/183	32/15278	0.320232	0.526938	0.473312	PRKCG	1
GO:0006536	glutamate metabolic process	1/183	32/15278	0.320232	0.526938	0.473312	SLC7A11	1
GO:0030851	granulocyte differentiation	1/183	32/15278	0.320232	0.526938	0.473312	C1QC	1
GO:0031112	positive regulation of microtubule polymerization or depolymerization	1/183	32/15278	0.320232	0.526938	0.473312	HSPA1B	1
GO:0035025	positive regulation of Rho protein signal transduction	1/183	32/15278	0.320232	0.526938	0.473312	COL3A1	1
GO:0035872	nucleotide-binding domain, leucine rich repeat containing receptor signaling pathway	1/183	32/15278	0.320232	0.526938	0.473312	HSPA1B	1
GO:0036314	response to sterol	1/183	32/15278	0.320232	0.526938	0.473312	LRP8	1
GO:0043094	cellular metabolic compound salvage	1/183	32/15278	0.320232	0.526938	0.473312	UCK2	1
GO:0048665	neuron fate specification	1/183	32/15278	0.320232	0.526938	0.473312	MYT1L	1
GO:0051482	positive regulation of cytosolic calcium ion concentration involved in phospholipase C-activating G protein-coupled signaling pathway	1/183	32/15278	0.320232	0.526938	0.473312	OPRL1	1
GO:0051931	regulation of sensory perception	1/183	32/15278	0.320232	0.526938	0.473312	OPRL1	1
GO:0060317	cardiac epithelial to mesenchymal transition	1/183	32/15278	0.320232	0.526938	0.473312	HEYL	1
GO:0097502	mannosylation	1/183	32/15278	0.320232	0.526938	0.473312	SDF2L1	1
GO:1901099	negative regulation of signal transduction in absence of ligand	1/183	32/15278	0.320232	0.526938	0.473312	HSPA1B	1
GO:1903427	negative regulation of reactive oxygen species biosynthetic process	1/183	32/15278	0.320232	0.526938	0.473312	GLA	1
GO:1903523	negative regulation of blood circulation	1/183	32/15278	0.320232	0.526938	0.473312	ADRA1A	1
GO:1903959	regulation of anion transmembrane transport	1/183	32/15278	0.320232	0.526938	0.473312	AGT	1
GO:1905332	positive regulation of morphogenesis of an epithelium	1/183	32/15278	0.320232	0.526938	0.473312	AGT	1
GO:2001240	negative regulation of extrinsic apoptotic signaling pathway in absence of ligand	1/183	32/15278	0.320232	0.526938	0.473312	HSPA1B	1
GO:0022407	regulation of cell-cell adhesion	6/183	389/15278	0.323355	0.531244	0.47718	VSIG4/FGL2/CITED2/ASS1/LGALS1/MDGA1	6
GO:0006941	striated muscle contraction	3/183	167/15278	0.323389	0.531244	0.47718	ADRA1B/RYR2/ADRA1A	3
GO:0022408	negative regulation of cell-cell adhesion	3/183	167/15278	0.323389	0.531244	0.47718	VSIG4/FGL2/ASS1	3
GO:1903362	regulation of cellular protein catabolic process	4/183	240/15278	0.324304	0.532181	0.478021	ANXA2/PRKCG/HSPA1B/GBA	4
GO:0001655	urogenital system development	5/183	315/15278	0.326163	0.532181	0.478021	CITED1/RET/AGT/HEYL/ASS1	5
GO:0003007	heart morphogenesis	4/183	241/15278	0.327017	0.532181	0.478021	RYR2/CITED2/HEYL/ELN	4
GO:0033673	negative regulation of kinase activity	4/183	241/15278	0.327017	0.532181	0.478021	DUSP9/AGT/PTPRT/GBA	4
GO:0006471	protein ADP-ribosylation	1/183	33/15278	0.328392	0.532181	0.478021	PARP8	1
GO:0009156	ribonucleoside monophosphate biosynthetic process	1/183	33/15278	0.328392	0.532181	0.478021	UCK2	1
GO:0009262	deoxyribonucleotide metabolic process	1/183	33/15278	0.328392	0.532181	0.478021	SAMHD1	1
GO:0010922	positive regulation of phosphatase activity	1/183	33/15278	0.328392	0.532181	0.478021	PPP1R15B	1
GO:0017144	drug metabolic process	1/183	33/15278	0.328392	0.532181	0.478021	VKORC1	1
GO:0019362	pyridine nucleotide metabolic process	1/183	33/15278	0.328392	0.532181	0.478021	AFMID	1
GO:0032801	receptor catabolic process	1/183	33/15278	0.328392	0.532181	0.478021	ANXA2	1
GO:0035774	positive regulation of insulin secretion involved in cellular response to glucose stimulus	1/183	33/15278	0.328392	0.532181	0.478021	ADCY8	1
GO:0035909	aorta morphogenesis	1/183	33/15278	0.328392	0.532181	0.478021	COL3A1	1
GO:0043330	response to exogenous dsRNA	1/183	33/15278	0.328392	0.532181	0.478021	SLC3A2	1
GO:0046496	nicotinamide nucleotide metabolic process	1/183	33/15278	0.328392	0.532181	0.478021	AFMID	1
GO:0048011	neurotrophin TRK receptor signaling pathway	1/183	33/15278	0.328392	0.532181	0.478021	AGT	1
GO:0051084	'de novo' posttranslational protein folding	1/183	33/15278	0.328392	0.532181	0.478021	HSPA1B	1
GO:0060338	regulation of type I interferon-mediated signaling pathway	1/183	33/15278	0.328392	0.532181	0.478021	SAMHD1	1
GO:0070873	regulation of glycogen metabolic process	1/183	33/15278	0.328392	0.532181	0.478021	SELENOS	1
GO:0072525	pyridine-containing compound biosynthetic process	1/183	33/15278	0.328392	0.532181	0.478021	AFMID	1
GO:1904037	positive regulation of epithelial cell apoptotic process	1/183	33/15278	0.328392	0.532181	0.478021	SFRP4	1
GO:0021549	cerebellum development	2/183	98/15278	0.328466	0.532181	0.478021	KLHL1/MYO16	2
GO:0042303	molting cycle	2/183	98/15278	0.328466	0.532181	0.478021	IGFBP5/ACVR1B	2
GO:0042633	hair cycle	2/183	98/15278	0.328466	0.532181	0.478021	IGFBP5/ACVR1B	2
GO:2001237	negative regulation of extrinsic apoptotic signaling pathway	2/183	98/15278	0.328466	0.532181	0.478021	SCG2/HSPA1B	2
GO:2000027	regulation of animal organ morphogenesis	4/183	242/15278	0.329732	0.533411	0.479126	ETV5/CITED1/AGT/CITED2	4
GO:0002285	lymphocyte activation involved in immune response	3/183	169/15278	0.329948	0.533411	0.479126	FGL2/LCP1/LGALS1	3
GO:0016241	regulation of macroautophagy	3/183	169/15278	0.329948	0.533411	0.479126	ATP6V0B/ERN1/GBA	3
GO:0060401	cytosolic calcium ion transport	3/183	169/15278	0.329948	0.533411	0.479126	ADCYAP1R1/RYR2/ADRA1A	3
GO:0006024	glycosaminoglycan biosynthetic process	2/183	99/15278	0.332851	0.53722	0.482548	ACAN/GLCE	2
GO:0006885	regulation of pH	2/183	99/15278	0.332851	0.53722	0.482548	ATP6V0B/SLC4A8	2
GO:0007044	cell-substrate junction assembly	2/183	99/15278	0.332851	0.53722	0.482548	LAMB3/LAMC2	2
GO:0003203	endocardial cushion morphogenesis	1/183	34/15278	0.336454	0.537815	0.483082	HEYL	1
GO:0007618	mating	1/183	34/15278	0.336454	0.537815	0.483082	THRA	1
GO:0010742	macrophage derived foam cell differentiation	1/183	34/15278	0.336454	0.537815	0.483082	AGT	1
GO:0014741	negative regulation of muscle hypertrophy	1/183	34/15278	0.336454	0.537815	0.483082	IGFBP5	1
GO:0016339	calcium-dependent cell-cell adhesion via plasma membrane cell adhesion molecules	1/183	34/15278	0.336454	0.537815	0.483082	CDH13	1
GO:0019228	neuronal action potential	1/183	34/15278	0.336454	0.537815	0.483082	GBA	1
GO:0033572	transferrin transport	1/183	34/15278	0.336454	0.537815	0.483082	ATP6V0B	1
GO:0034383	low-density lipoprotein particle clearance	1/183	34/15278	0.336454	0.537815	0.483082	ANXA2	1
GO:0035633	maintenance of blood-brain barrier	1/183	34/15278	0.336454	0.537815	0.483082	MFSD2A	1
GO:0048536	spleen development	1/183	34/15278	0.336454	0.537815	0.483082	CITED2	1
GO:0051354	negative regulation of oxidoreductase activity	1/183	34/15278	0.336454	0.537815	0.483082	GLA	1
GO:0070296	sarcoplasmic reticulum calcium ion transport	1/183	34/15278	0.336454	0.537815	0.483082	RYR2	1
GO:0086005	ventricular cardiac muscle cell action potential	1/183	34/15278	0.336454	0.537815	0.483082	RYR2	1
GO:0090077	foam cell differentiation	1/183	34/15278	0.336454	0.537815	0.483082	AGT	1
GO:0097009	energy homeostasis	1/183	34/15278	0.336454	0.537815	0.483082	MFSD2A	1
GO:1902742	apoptotic process involved in development	1/183	34/15278	0.336454	0.537815	0.483082	CRYAB	1
GO:0050796	regulation of insulin secretion	3/183	171/15278	0.336507	0.537815	0.483082	SYT9/MYRIP/ADCY8	3
GO:0051099	positive regulation of binding	3/183	171/15278	0.336507	0.537815	0.483082	ANXA2/B2M/NME1	3
GO:0006641	triglyceride metabolic process	2/183	100/15278	0.337228	0.537815	0.483082	SIK1/MFSD2A	2
GO:0032526	response to retinoic acid	2/183	100/15278	0.337228	0.537815	0.483082	RET/COL1A1	2
GO:0071887	leukocyte apoptotic process	2/183	100/15278	0.337228	0.537815	0.483082	SLC7A11/SELENOS	2
GO:1901606	alpha-amino acid catabolic process	2/183	100/15278	0.337228	0.537815	0.483082	ASRGL1/AFMID	2
GO:0015711	organic anion transport	7/183	473/15278	0.33894	0.540255	0.485274	SLC7A11/AGT/SLC3A2/MFSD2A/SLC4A8/SLC38A2/SYT4	7
GO:0008064	regulation of actin polymerization or depolymerization	3/183	172/15278	0.339785	0.541017	0.485958	SEMA5A/ELN/FHOD3	3
GO:0009260	ribonucleotide biosynthetic process	3/183	172/15278	0.339785	0.541017	0.485958	NME1/ADCY8/UCK2	3
GO:0071902	positive regulation of protein serine/threonine kinase activity	5/183	321/15278	0.340359	0.541563	0.486449	DUSP9/RET/AGT/ERN1/ERP29	5
GO:0009165	nucleotide biosynthetic process	4/183	246/15278	0.340604	0.541563	0.486449	AFMID/NME1/ADCY8/UCK2	4
GO:0007229	integrin-mediated signaling pathway	2/183	101/15278	0.341596	0.541563	0.486449	COL3A1/CD63	2
GO:0018958	phenol-containing compound metabolic process	2/183	101/15278	0.341596	0.541563	0.486449	SLC7A11/CITED1	2
GO:0030148	sphingolipid biosynthetic process	2/183	101/15278	0.341596	0.541563	0.486449	ST6GALNAC5/GBA	2
GO:0032091	negative regulation of protein binding	2/183	101/15278	0.341596	0.541563	0.486449	B2M/TLE5	2
GO:0034446	substrate adhesion-dependent cell spreading	2/183	101/15278	0.341596	0.541563	0.486449	P4HB/LAMB3	2
GO:0071621	granulocyte chemotaxis	2/183	101/15278	0.341596	0.541563	0.486449	PPIB/SCG2	2
GO:0002253	activation of immune response	6/183	398/15278	0.342446	0.541632	0.486511	CFI/VSIG4/C1QA/C1QC/C1QB/HLA-DQB1	6
GO:0030832	regulation of actin filament length	3/183	173/15278	0.343062	0.541632	0.486511	SEMA5A/ELN/FHOD3	3
GO:0050821	protein stabilization	3/183	173/15278	0.343062	0.541632	0.486511	PPIB/HSPA1B/CRYAB	3
GO:1905330	regulation of morphogenesis of an epithelium	3/183	173/15278	0.343062	0.541632	0.486511	ETV5/CITED1/AGT	3
GO:0001913	T cell mediated cytotoxicity	1/183	35/15278	0.344419	0.541632	0.486511	B2M	1
GO:0006007	glucose catabolic process	1/183	35/15278	0.344419	0.541632	0.486511	ALDOC	1
GO:0009069	serine family amino acid metabolic process	1/183	35/15278	0.344419	0.541632	0.486511	SLC7A11	1
GO:0010259	multicellular organism aging	1/183	35/15278	0.344419	0.541632	0.486511	CRYAB	1
GO:0033144	negative regulation of intracellular steroid hormone receptor signaling pathway	1/183	35/15278	0.344419	0.541632	0.486511	HEYL	1
GO:0034105	positive regulation of tissue remodeling	1/183	35/15278	0.344419	0.541632	0.486511	SPP1	1
GO:0060323	head morphogenesis	1/183	35/15278	0.344419	0.541632	0.486511	COL1A1	1
GO:0070897	transcription preinitiation complex assembly	1/183	35/15278	0.344419	0.541632	0.486511	THRA	1
GO:0090224	regulation of spindle organization	1/183	35/15278	0.344419	0.541632	0.486511	HSPA1B	1
GO:0098751	bone cell development	1/183	35/15278	0.344419	0.541632	0.486511	ANXA2	1
GO:1905898	positive regulation of response to endoplasmic reticulum stress	1/183	35/15278	0.344419	0.541632	0.486511	ERN1	1
GO:0001933	negative regulation of protein phosphorylation	6/183	399/15278	0.344575	0.541632	0.486511	DUSP9/AGT/C1QL4/PTPRT/PPP1R15B/GBA	6
GO:0048871	multicellular organismal homeostasis	7/183	476/15278	0.344781	0.541667	0.486542	SPP1/B2M/MFSD2A/ATF4/THRA/ADCY8/GBA	7
GO:0150115	cell-substrate junction organization	2/183	102/15278	0.345955	0.542933	0.48768	LAMB3/LAMC2	2
GO:1902414	protein localization to cell junction	2/183	102/15278	0.345955	0.542933	0.48768	NRXN2/DLG4	2
GO:1901293	nucleoside phosphate biosynthetic process	4/183	249/15278	0.348767	0.546485	0.49087	AFMID/NME1/ADCY8/UCK2	4
GO:0030177	positive regulation of Wnt signaling pathway	3/183	175/15278	0.349612	0.546485	0.49087	SEMA5A/SFRP4/COL1A1	3
GO:0005976	polysaccharide metabolic process	2/183	103/15278	0.350304	0.546485	0.49087	PYGM/SELENOS	2
GO:0019395	fatty acid oxidation	2/183	103/15278	0.350304	0.546485	0.49087	MFSD2A/CYP4V2	2
GO:0043618	regulation of transcription from RNA polymerase II promoter in response to stress	2/183	103/15278	0.350304	0.546485	0.49087	CITED2/ATF4	2
GO:1901800	positive regulation of proteasomal protein catabolic process	2/183	103/15278	0.350304	0.546485	0.49087	HSPA1B/GBA	2
GO:1903510	mucopolysaccharide metabolic process	2/183	103/15278	0.350304	0.546485	0.49087	ACAN/GLCE	2
GO:0010506	regulation of autophagy	5/183	326/15278	0.352227	0.546485	0.49087	ATP6V0B/ERN1/CTSA/GBA/ADRA1A	5
GO:0001893	maternal placenta development	1/183	36/15278	0.35229	0.546485	0.49087	SPP1	1
GO:0002043	blood vessel endothelial cell proliferation involved in sprouting angiogenesis	1/183	36/15278	0.35229	0.546485	0.49087	SEMA5A	1
GO:0010737	protein kinase A signaling	1/183	36/15278	0.35229	0.546485	0.49087	LCP1	1
GO:0033280	response to vitamin D	1/183	36/15278	0.35229	0.546485	0.49087	SPP1	1
GO:0043902	positive regulation of multi-organism process	1/183	36/15278	0.35229	0.546485	0.49087	ACVR1B	1
GO:0044058	regulation of digestive system process	1/183	36/15278	0.35229	0.546485	0.49087	OPRL1	1
GO:0045070	positive regulation of viral genome replication	1/183	36/15278	0.35229	0.546485	0.49087	PPIB	1
GO:0045742	positive regulation of epidermal growth factor receptor signaling pathway	1/183	36/15278	0.35229	0.546485	0.49087	AGT	1
GO:0048009	insulin-like growth factor receptor signaling pathway	1/183	36/15278	0.35229	0.546485	0.49087	IGFBP5	1
GO:0050775	positive regulation of dendrite morphogenesis	1/183	36/15278	0.35229	0.546485	0.49087	LRP8	1
GO:0060428	lung epithelium development	1/183	36/15278	0.35229	0.546485	0.49087	THRA	1
GO:1901068	guanosine-containing compound metabolic process	1/183	36/15278	0.35229	0.546485	0.49087	NME1	1
GO:2000273	positive regulation of signaling receptor activity	1/183	36/15278	0.35229	0.546485	0.49087	ARC	1
GO:2000310	regulation of NMDA receptor activity	1/183	36/15278	0.35229	0.546485	0.49087	DLG4	1
GO:0061136	regulation of proteasomal protein catabolic process	3/183	176/15278	0.352885	0.546834	0.491183	PRKCG/HSPA1B/GBA	3
GO:0061138	morphogenesis of a branching epithelium	3/183	176/15278	0.352885	0.546834	0.491183	ETV5/CITED1/AGT	3
GO:0010927	cellular component assembly involved in morphogenesis	2/183	104/15278	0.354644	0.548695	0.492855	PGM5/FHOD3	2
GO:0034754	cellular hormone metabolic process	2/183	104/15278	0.354644	0.548695	0.492855	SPP1/SCPEP1	2
GO:0050868	negative regulation of T cell activation	2/183	104/15278	0.354644	0.548695	0.492855	VSIG4/FGL2	2
GO:0045017	glycerolipid biosynthetic process	4/183	252/15278	0.356933	0.551732	0.495583	DGKG/SIK1/MFSD2A/ABHD8	4
GO:0001666	response to hypoxia	5/183	328/15278	0.356981	0.551732	0.495583	PAM/RYR2/CITED2/P4HB/CRYAB	5
GO:0034504	protein localization to nucleus	4/183	253/15278	0.359655	0.553314	0.497004	AGT/RANGAP1/COL1A1/CABP1	4
GO:0000578	embryonic axis specification	1/183	37/15278	0.360067	0.553314	0.497004	CITED1	1
GO:0003156	regulation of animal organ formation	1/183	37/15278	0.360067	0.553314	0.497004	CITED2	1
GO:0006458	'de novo' protein folding	1/183	37/15278	0.360067	0.553314	0.497004	HSPA1B	1
GO:0006656	phosphatidylcholine biosynthetic process	1/183	37/15278	0.360067	0.553314	0.497004	MFSD2A	1
GO:0032885	regulation of polysaccharide biosynthetic process	1/183	37/15278	0.360067	0.553314	0.497004	SELENOS	1
GO:0045746	negative regulation of Notch signaling pathway	1/183	37/15278	0.360067	0.553314	0.497004	CHAC1	1
GO:0050850	positive regulation of calcium-mediated signaling	1/183	37/15278	0.360067	0.553314	0.497004	CDH13	1
GO:0060260	regulation of transcription initiation from RNA polymerase II promoter	1/183	37/15278	0.360067	0.553314	0.497004	THRA	1
GO:0098926	postsynaptic signal transduction	1/183	37/15278	0.360067	0.553314	0.497004	CHRM2	1
GO:1900026	positive regulation of substrate adhesion-dependent cell spreading	1/183	37/15278	0.360067	0.553314	0.497004	P4HB	1
GO:0048608	reproductive structure development	6/183	407/15278	0.361653	0.555304	0.498792	SPP1/CITED1/MAMLD1/PTPRN/CITED2/VGF	6
GO:0040013	negative regulation of locomotion	5/183	330/15278	0.361738	0.555304	0.498792	SEMA5A/COL3A1/IGFBP5/CITED2/PTPRT	5
GO:0046390	ribose phosphate biosynthetic process	3/183	179/15278	0.362692	0.55648	0.499848	NME1/ADCY8/UCK2	3
GO:0006023	aminoglycan biosynthetic process	2/183	106/15278	0.363293	0.556534	0.499897	ACAN/GLCE	2
GO:0030282	bone mineralization	2/183	106/15278	0.363293	0.556534	0.499897	ATF4/SLC24A3	2
GO:0048640	negative regulation of developmental growth	2/183	106/15278	0.363293	0.556534	0.499897	SPP1/SEMA5A	2
GO:0001667	ameboidal-type cell migration	6/183	408/15278	0.363792	0.55701	0.500323	SEMA5A/SCG2/RET/AGT/CDH13/ACVR1B	6
GO:0007265	Ras protein signal transduction	5/183	331/15278	0.364117	0.557218	0.500511	ARHGEF28/COL3A1/CDH13/RASGRP3/ADRA1A	5
GO:0051271	negative regulation of cellular component movement	5/183	332/15278	0.366497	0.558723	0.501863	SEMA5A/COL3A1/IGFBP5/CITED2/PTPRT	5
GO:0022037	metencephalon development	2/183	107/15278	0.367602	0.558723	0.501863	KLHL1/MYO16	2
GO:0046822	regulation of nucleocytoplasmic transport	2/183	107/15278	0.367602	0.558723	0.501863	RANGAP1/CABP1	2
GO:0051341	regulation of oxidoreductase activity	2/183	107/15278	0.367602	0.558723	0.501863	GLA/AGT	2
GO:0000096	sulfur amino acid metabolic process	1/183	38/15278	0.36775	0.558723	0.501863	SLC7A11	1
GO:0007223	Wnt signaling pathway, calcium modulating pathway	1/183	38/15278	0.36775	0.558723	0.501863	CAMK2A	1
GO:0007257	activation of JUN kinase activity	1/183	38/15278	0.36775	0.558723	0.501863	ERN1	1
GO:0010574	regulation of vascular endothelial growth factor production	1/183	38/15278	0.36775	0.558723	0.501863	ATF4	1
GO:0016601	Rac protein signal transduction	1/183	38/15278	0.36775	0.558723	0.501863	CDH13	1
GO:0050691	regulation of defense response to virus by host	1/183	38/15278	0.36775	0.558723	0.501863	RNF216	1
GO:0071364	cellular response to epidermal growth factor stimulus	1/183	38/15278	0.36775	0.558723	0.501863	COL1A1	1
GO:0072524	pyridine-containing compound metabolic process	1/183	38/15278	0.36775	0.558723	0.501863	AFMID	1
GO:1901021	positive regulation of calcium ion transmembrane transporter activity	1/183	38/15278	0.36775	0.558723	0.501863	RYR2	1
GO:1901186	positive regulation of ERBB signaling pathway	1/183	38/15278	0.36775	0.558723	0.501863	AGT	1
GO:0048017	inositol lipid-mediated signaling	3/183	181/15278	0.369218	0.560665	0.503607	AGT/MYO16/ADAP2	3
GO:0061458	reproductive system development	6/183	411/15278	0.370214	0.561888	0.504705	SPP1/CITED1/MAMLD1/PTPRN/CITED2/VGF	6
GO:0018107	peptidyl-threonine phosphorylation	2/183	108/15278	0.371899	0.563576	0.506221	CAMK2A/ACVR1B	2
GO:0034440	lipid oxidation	2/183	108/15278	0.371899	0.563576	0.506221	MFSD2A/CYP4V2	2
GO:0043620	regulation of DNA-templated transcription in response to stress	2/183	108/15278	0.371899	0.563576	0.506221	CITED2/ATF4	2
GO:0051346	negative regulation of hydrolase activity	6/183	413/15278	0.374498	0.565023	0.507522	CAMK2A/ANXA2/AGT/MARF1/SERPINB10/CRYAB	6
GO:0001990	regulation of systemic arterial blood pressure by hormone	1/183	39/15278	0.375342	0.565023	0.507522	AGT	1
GO:0006734	NADH metabolic process	1/183	39/15278	0.375342	0.565023	0.507522	ALDOC	1
GO:0006953	acute-phase response	1/183	39/15278	0.375342	0.565023	0.507522	ASS1	1
GO:0009187	cyclic nucleotide metabolic process	1/183	39/15278	0.375342	0.565023	0.507522	ADCY8	1
GO:0015701	bicarbonate transport	1/183	39/15278	0.375342	0.565023	0.507522	SLC4A8	1
GO:0030866	cortical actin cytoskeleton organization	1/183	39/15278	0.375342	0.565023	0.507522	FHOD3	1
GO:0038179	neurotrophin signaling pathway	1/183	39/15278	0.375342	0.565023	0.507522	AGT	1
GO:0043331	response to dsRNA	1/183	39/15278	0.375342	0.565023	0.507522	SLC3A2	1
GO:0045684	positive regulation of epidermis development	1/183	39/15278	0.375342	0.565023	0.507522	SFRP4	1
GO:0046825	regulation of protein export from nucleus	1/183	39/15278	0.375342	0.565023	0.507522	RANGAP1	1
GO:0086004	regulation of cardiac muscle cell contraction	1/183	39/15278	0.375342	0.565023	0.507522	RYR2	1
GO:1902895	positive regulation of pri-miRNA transcription by RNA polymerase II	1/183	39/15278	0.375342	0.565023	0.507522	FOS	1
GO:0051216	cartilage development	3/183	183/15278	0.375733	0.565138	0.507625	COL1A1/THRA/ACAN	3
GO:0003279	cardiac septum development	2/183	109/15278	0.376185	0.565138	0.507625	CITED2/HEYL	2
GO:0019079	viral genome replication	2/183	109/15278	0.376185	0.565138	0.507625	PPIB/BTBD17	2
GO:0099565	chemical synaptic transmission, postsynaptic	2/183	109/15278	0.376185	0.565138	0.507625	INSYN2A/DLG4	2
GO:1902115	regulation of organelle assembly	3/183	184/15278	0.378985	0.569056	0.511144	LRRC4B/LCP1/HSPA1B	3
GO:0002521	leukocyte differentiation	7/183	494/15278	0.380039	0.570349	0.512305	ANXA2/B2M/FOS/FGL2/C1QC/LGALS1/NME1	7
GO:0010595	positive regulation of endothelial cell migration	2/183	110/15278	0.380458	0.570687	0.512609	SEMA5A/AGT	2
GO:0009755	hormone-mediated signaling pathway	3/183	185/15278	0.382234	0.571074	0.512956	HEYL/CRHR1/THRA	3
GO:0097529	myeloid leukocyte migration	3/183	185/15278	0.382234	0.571074	0.512956	PPIB/SCG2/GP2	3
GO:0001974	blood vessel remodeling	1/183	40/15278	0.382844	0.571074	0.512956	AGT	1
GO:0002369	T cell cytokine production	1/183	40/15278	0.382844	0.571074	0.512956	B2M	1
GO:0002673	regulation of acute inflammatory response	1/183	40/15278	0.382844	0.571074	0.512956	SELENOS	1
GO:0019731	antibacterial humoral response	1/183	40/15278	0.382844	0.571074	0.512956	KLK7	1
GO:0030521	androgen receptor signaling pathway	1/183	40/15278	0.382844	0.571074	0.512956	HEYL	1
GO:0038084	vascular endothelial growth factor signaling pathway	1/183	40/15278	0.382844	0.571074	0.512956	CD63	1
GO:0045005	DNA-dependent DNA replication maintenance of fidelity	1/183	40/15278	0.382844	0.571074	0.512956	SAMHD1	1
GO:0045124	regulation of bone resorption	1/183	40/15278	0.382844	0.571074	0.512956	SPP1	1
GO:2000772	regulation of cellular senescence	1/183	40/15278	0.382844	0.571074	0.512956	B2M	1
GO:0010906	regulation of glucose metabolic process	2/183	111/15278	0.38472	0.572714	0.51443	SIK1/SELENOS	2
GO:0017015	regulation of transforming growth factor beta receptor signaling pathway	2/183	111/15278	0.38472	0.572714	0.51443	CITED1/CITED2	2
GO:0031109	microtubule polymerization or depolymerization	2/183	111/15278	0.38472	0.572714	0.51443	HSPA1B/CRYAB	2
GO:1903828	negative regulation of cellular protein localization	2/183	111/15278	0.38472	0.572714	0.51443	RANGAP1/CABP1	2
GO:0032386	regulation of intracellular transport	5/183	341/15278	0.387918	0.577184	0.518445	ANXA2/LCP1/RANGAP1/CABP1/CRYAB	5
GO:1903708	positive regulation of hemopoiesis	3/183	187/15278	0.388721	0.57804	0.519214	FOS/ACVR1B/HSPA1B	3
GO:0046425	regulation of receptor signaling pathway via JAK-STAT	2/183	112/15278	0.388968	0.57804	0.519214	RET/AGT	2
GO:0051403	stress-activated MAPK cascade	4/183	264/15278	0.389561	0.57804	0.519214	DUSP9/AGT/ERN1/CRYAB	4
GO:0032881	regulation of polysaccharide metabolic process	1/183	41/15278	0.390255	0.57804	0.519214	SELENOS	1
GO:0035987	endodermal cell differentiation	1/183	41/15278	0.390255	0.57804	0.519214	LAMB3	1
GO:0045214	sarcomere organization	1/183	41/15278	0.390255	0.57804	0.519214	FHOD3	1
GO:0045773	positive regulation of axon extension	1/183	41/15278	0.390255	0.57804	0.519214	SEMA5A	1
GO:0046717	acid secretion	1/183	41/15278	0.390255	0.57804	0.519214	OPRL1	1
GO:2000648	positive regulation of stem cell proliferation	1/183	41/15278	0.390255	0.57804	0.519214	CITED1	1
GO:1902105	regulation of leukocyte differentiation	4/183	265/15278	0.392273	0.580737	0.521636	FOS/FGL2/C1QC/NME1	4
GO:0002698	negative regulation of immune effector process	2/183	113/15278	0.393204	0.581304	0.522145	VSIG4/FGL2	2
GO:1903844	regulation of cellular response to transforming growth factor beta stimulus	2/183	113/15278	0.393204	0.581304	0.522145	CITED1/CITED2	2
GO:0042391	regulation of membrane potential	6/183	422/15278	0.393791	0.581304	0.522145	INSYN2A/RYR2/SLC4A8/DLG4/GBA/ADRA1A	6
GO:0030278	regulation of ossification	3/183	189/15278	0.395191	0.581304	0.522145	CITED1/IGFBP5/ATF4	3
[truncated: 954 more rows]

## Sheet: b
Gene ontology (GO) of common DEGs between camel and rat: biological processes (BPs)										Gene ontology (GO) of common DEGs between camel and rat: KEGG pathways
GO: BP term ID	Description	GeneRatio	BgRatio	pvalue	p.adjust	qvalue	geneID	Count		KEGG pathway ID	Description	GeneRatio	BgRatio	pvalue	p.adjust	qvalue	geneID	Count
GO:0051591	response to cAMP	6/80	89/15278	7.00868e-06	0.00706324	0.00646344	VGF/CITED1/FOS/PTPRN/IGFBP5/NME1	6		hsa04141	Protein processing in endoplasmic reticulum	7/43	159/6840	5.12287e-05	0.0073257	0.00663276	CRYAB/P4HB/PRKCSH/PDIA4/ERP29/RPN2/ATF4	7
GO:0014074	response to purine-containing compound	7/80	138/15278	7.72361e-06	0.00706324	0.00646344	VGF/CITED1/FOS/PTPRN/IGFBP5/NME1/RYR2	7		hsa04725	Cholinergic synapse	4/43	106/6840	0.00422706	0.255696	0.23151	FOS/KCNQ2/ADCY8/ATF4	4
GO:0046683	response to organophosphorus	6/80	123/15278	4.45105e-05	0.0271366	0.0248322	VGF/CITED1/FOS/PTPRN/IGFBP5/NME1	6		hsa05031	Amphetamine addiction	3/43	63/6840	0.00707087	0.255696	0.23151	PDYN/FOS/ATF4	3
GO:0045666	positive regulation of neuron differentiation	9/80	355/15278	9.67854e-05	0.0442551	0.040497	ETV5/RET/RNF112/NME1/PLXNA4/LRP8/UNC13A/HEYL/SYT4	9		hsa04915	Estrogen signaling pathway	4/43	123/6840	0.00715233	0.255696	0.23151	FOS/ADCY8/GABBR2/ATF4	4
GO:0048791	calcium ion-regulated exocytosis of neurotransmitter	3/80	23/15278	0.000227028	0.0765718	0.0700694	SYT9/UNC13A/SYT4	3		hsa04918	Thyroid hormone synthesis	3/43	72/6840	0.0102123	0.260088	0.235487	PDIA4/ADCY8/ATF4	3
GO:0006817	phosphate ion transport	3/80	26/15278	0.000329548	0.0765718	0.0700694	SLC20A1/ATF4/SFRP4	3		hsa04261	Adrenergic signaling in cardiomyocytes	4/43	139/6840	0.0109128	0.260088	0.235487	CREM/ADCY8/RYR2/ATF4	4
GO:0009306	protein secretion	9/80	419/15278	0.00033382	0.0765718	0.0700694	VGF/PAM/PTPRN/SYT9/SCG2/PDIA4/ERP29/ADCY8/SYT4	9		hsa04911	Insulin secretion	3/43	82/6840	0.0145209	0.288062	0.260815	ADCY8/RYR2/ATF4	3
GO:0035592	establishment of protein localization to extracellular region	9/80	420/15278	0.000339697	0.0765718	0.0700694	VGF/PAM/PTPRN/SYT9/SCG2/PDIA4/ERP29/ADCY8/SYT4	9		hsa04727	GABAergic synapse	3/43	87/6840	0.0170076	0.288062	0.260815	SLC38A2/ADCY8/GABBR2	3
GO:0071692	protein localization to extracellular region	9/80	426/15278	0.000376789	0.0765718	0.0700694	VGF/PAM/PTPRN/SYT9/SCG2/PDIA4/ERP29/ADCY8/SYT4	9		hsa04713	Circadian entrainment	3/43	91/6840	0.0191589	0.288062	0.260815	FOS/ADCY8/RYR2	3
GO:0043627	response to estrogen	4/80	73/15278	0.00057671	0.0898936	0.08226	CITED1/PTPRN/GBA/CITED2	4		hsa04216	Ferroptosis	2/43	35/6840	0.0201442	0.288062	0.260815	SAT1/SLC3A2	2
GO:0050769	positive regulation of neurogenesis	9/80	455/15278	0.000606554	0.0898936	0.08226	ETV5/RET/RNF112/NME1/PLXNA4/LRP8/UNC13A/HEYL/SYT4	9		hsa04928	Parathyroid hormone synthesis, secretion and action	3/43	103/6840	0.0264826	0.297307	0.269185	FOS/ADCY8/ATF4	3
GO:0002790	peptide secretion	9/80	456/15278	0.000616167	0.0898936	0.08226	VGF/PAM/PTPRN/SYT9/SCG2/PDIA4/ERP29/ADCY8/SYT4	9		hsa00983	Drug metabolism - other enzymes	2/43	44/6840	0.0309103	0.297307	0.269185	UCK2/NME1	2
GO:0071277	cellular response to calcium ion	4/80	75/15278	0.000638938	0.0898936	0.08226	FOS/SYT9/ADCY8/SYT4	4		hsa05110	Vibrio cholerae infection	2/43	46/6840	0.0335532	0.297307	0.269185	PDIA4/KDELR2	2
GO:0051592	response to calcium ion	5/80	138/15278	0.000781012	0.100002	0.0915103	FOS/SYT9/ADCY8/RYR2/SYT4	5		hsa04935	Growth hormone synthesis, secretion and action	3/43	113/6840	0.0335833	0.297307	0.269185	FOS/ADCY8/ATF4	3
GO:0048511	rhythmic process	7/80	291/15278	0.000820139	0.100002	0.0915103	PAM/CREM/PTPRN/SIK1/OPRL1/DBP/ATF4	7		hsa05030	Cocaine addiction	2/43	47/6840	0.0349069	0.297307	0.269185	PDYN/ATF4	2
GO:0006241	CTP biosynthetic process	2/80	11/15278	0.00144433	0.139564	0.127712	UCK2/NME1	2		hsa00600	Sphingolipid metabolism	2/43	48/6840	0.0362816	0.297307	0.269185	GLA/GBA	2
GO:0031915	positive regulation of synaptic plasticity	2/80	11/15278	0.00144433	0.139564	0.127712	ADCY8/UNC13A	2		hsa04024	cAMP signaling pathway	4/43	202/6840	0.0371545	0.297307	0.269185	FOS/ADCY8/RYR2/GABBR2	4
GO:0046036	CTP metabolic process	2/80	11/15278	0.00144433	0.139564	0.127712	UCK2/NME1	2		hsa00240	Pyrimidine metabolism	2/43	51/6840	0.0405293	0.297307	0.269185	c	2
GO:0009409	response to cold	3/80	44/15278	0.00156872	0.139564	0.127712	VGF/FOS/THRA	3		hsa04926	Relaxin signaling pathway	3/43	122/6840	0.0407416	0.297307	0.269185	FOS/ADCY8/ATF4	3
GO:0048732	gland development	8/80	421/15278	0.00159384	0.139564	0.127712	PAM/ETV5/IGFBP5/PRKCSH/NME1/THRA/CITED2/DBP	8		hsa04142	Lysosome	3/43	123/6840	0.0415814	0.297307	0.269185	CD63/GLA/GBA	3
GO:0009209	pyrimidine ribonucleoside triphosphate biosynthetic process	2/80	12/15278	0.00172732	0.139564	0.127712	UCK2/NME1	2		hsa04213	Longevity regulating pathway - multiple species	2/43	59/6840	0.0527099	0.338499	0.306481	CRYAB/ADCY8	2
GO:0038003	opioid receptor signaling pathway	2/80	12/15278	0.00172732	0.139564	0.127712	OPRL1/ADCY8	2		hsa04927	Cortisol synthesis and secretion	2/43	59/6840	0.0527099	0.338499	0.306481	ADCY8/ATF4	2
GO:0007611	learning or memory	6/80	246/15278	0.00182358	0.139564	0.127712	FOS/KCNAB1/OPRL1/ADCY8/SYT4/THRA	6		hsa04137	Mitophagy - animal	2/43	61/6840	0.0559367	0.338499	0.306481	CITED2/ATF4	2
GO:0010038	response to metal ion	7/80	340/15278	0.00200863	0.139564	0.127712	PAM/FOS/SYT9/ADCY8/RYR2/SYT4/ATF4	7		hsa04720	Long-term potentiation	2/43	62/6840	0.0575758	0.338499	0.306481	ADCY8/ATF4	2
GO:0009208	pyrimidine ribonucleoside triphosphate metabolic process	2/80	13/15278	0.00203446	0.139564	0.127712	UCK2/NME1	2		hsa04921	Oxytocin signaling pathway	3/43	142/6840	0.0591782	0.338499	0.306481	FOS/ADCY8/RYR2	3
GO:0048172	regulation of short-term neuronal synaptic plasticity	2/80	13/15278	0.00203446	0.139564	0.127712	UNC13A/SYT4	2		hsa04742	Taste transduction	2/43	65/6840	0.0625928	0.344261	0.311697	ADCY8/GABBR2	2
GO:0071248	cellular response to metal ion	5/80	172/15278	0.00207656	0.139564	0.127712	FOS/SYT9/ADCY8/SYT4/ATF4	5		hsa00603	Glycosphingolipid biosynthesis - globo and isoglobo series	1/43	14/6840	0.0845814	0.442533	0.400674	GLA	1
GO:0007565	female pregnancy	5/80	175/15278	0.00223901	0.139564	0.127712	PAM/FOS/IGFBP5/SLC38A2/ACVR1B	5		hsa04211	Longevity regulating pathway	2/43	85/6840	0.0994005	0.442533	0.400674	ADCY8/ATF4	2
GO:0016137	glycoside metabolic process	2/80	14/15278	0.00236549	0.139564	0.127712	GLA/GBA	2		hsa04912	GnRH signaling pathway	2/43	86/6840	0.101375	0.442533	0.400674	ADCY8/ATF4	2
GO:0032328	alanine transport	2/80	14/15278	0.00236549	0.139564	0.127712	SLC38A2/SLC3A2	2		hsa05032	Morphine addiction	2/43	89/6840	0.107362	0.442533	0.400674	ADCY8/GABBR2	2
GO:0038092	nodal signaling pathway	2/80	14/15278	0.00236549	0.139564	0.127712	ACVR1B/CITED2	2		hsa00511	Other glycan degradation	1/43	18/6840	0.107436	0.442533	0.400674	GBA	1
GO:0048167	regulation of synaptic plasticity	5/80	181/15278	0.00259146	0.146329	0.133903	VGF/ADCY8/UNC13A/SYT4/ATF4	5		hsa01522	Endocrine resistance	2/43	90/6840	0.109379	0.442533	0.400674	FOS/ADCY8	2
GO:1901657	glycosyl compound metabolic process	4/80	110/15278	0.00264334	0.146329	0.133903	UCK2/GLA/NME1/GBA	4		hsa04925	Aldosterone synthesis and secretion	2/43	90/6840	0.109379	0.442533	0.400674	ADCY8/ATF4	2
GO:0046479	glycosphingolipid catabolic process	2/80	15/15278	0.00272016	0.146329	0.133903	GLA/GBA	2		hsa04974	Protein digestion and absorption	2/43	90/6840	0.109379	0.442533	0.400674	SLC38A2/SLC3A2	2
GO:0010976	positive regulation of neuron projection development	6/80	272/15278	0.00301159	0.153717	0.140663	RET/NME1/PLXNA4/LRP8/UNC13A/SYT4	6		hsa05215	Prostate cancer	2/43	91/6840	0.111407	0.442533	0.400674	ETV5/ATF4	2
GO:0009148	pyrimidine nucleoside triphosphate biosynthetic process	2/80	16/15278	0.00309822	0.153717	0.140663	UCK2/NME1	2		hsa05414	Dilated cardiomyopathy	2/43	91/6840	0.111407	0.442533	0.400674	ADCY8/RYR2	2
GO:0070059	intrinsic apoptotic signaling pathway in response to endoplasmic reticulum stress	3/80	56/15278	0.00313884	0.153717	0.140663	ERP29/CHAC1/ATF4	3		hsa04972	Pancreatic secretion	2/43	93/6840	0.115492	0.44636	0.404139	ADCY8/RYR2	2
GO:0060537	muscle tissue development	7/80	375/15278	0.00346781	0.153717	0.140663	FOS/IGFBP5/KCNAB1/SIK1/FHOD3/RYR2/HEYL	7		hsa04922	Glucagon signaling pathway	2/43	95/6840	0.119615	0.450132	0.407554	SIK1/ATF4	2
GO:0019377	glycolipid catabolic process	2/80	17/15278	0.00349943	0.153717	0.140663	GLA/GBA	2		hsa04080	Neuroactive ligand-receptor interaction	4/43	308/6840	0.126599	0.460084	0.416564	PDYN/OPRL1/GABBR2/THRA	4
GO:0035994	response to muscle stretch	2/80	17/15278	0.00349943	0.153717	0.140663	FOS/RYR2	2		hsa05166	Human T-cell leukemia virus 1 infection	3/43	199/6840	0.128695	0.460084	0.416564	FOS/ADCY8/ATF4	3
GO:0045956	positive regulation of calcium ion-dependent exocytosis	2/80	17/15278	0.00349943	0.153717	0.140663	SYT9/SYT4	2		hsa00534	Glycosaminoglycan biosynthesis - heparan sulfate / heparin	1/43	23/6840	0.135221	0.471625	0.427014	GLCE	1
GO:0050890	cognition	6/80	284/15278	0.00372288	0.153717	0.140663	FOS/KCNAB1/OPRL1/ADCY8/SYT4/THRA	6		hsa04668	TNF signaling pathway	2/43	106/6840	0.142919	0.486606	0.440578	FOS/ATF4	2
GO:0071241	cellular response to inorganic substance	5/80	197/15278	0.00372696	0.153717	0.140663	FOS/SYT9/ADCY8/SYT4/ATF4	5		hsa04724	Glutamatergic synapse	2/43	109/6840	0.149438	0.496968	0.44996	SLC38A2/ADCY8	2
GO:0044706	multi-multicellular organism process	5/80	199/15278	0.00389047	0.153717	0.140663	PAM/FOS/IGFBP5/SLC38A2/ACVR1B	5		hsa00030	Pentose phosphate pathway	1/43	28/6840	0.162161	0.51628	0.467446	ALDOC	1
GO:0006677	glycosylceramide metabolic process	2/80	18/15278	0.00392353	0.153717	0.140663	GLA/GBA	2		hsa00052	Galactose metabolism	1/43	29/6840	0.16745	0.51628	0.467446	GLA	1
GO:0006687	glycosphingolipid metabolic process	3/80	61/15278	0.0039997	0.153717	0.140663	CREM/GLA/GBA	3		hsa00051	Fructose and mannose metabolism	1/43	30/6840	0.172706	0.51628	0.467446	ALDOC	1
GO:0017156	calcium-ion regulated exocytosis	3/80	62/15278	0.00418738	0.153717	0.140663	SYT9/UNC13A/SYT4	3		hsa04940	Type I diabetes mellitus	1/43	30/6840	0.172706	0.51628	0.467446	PTPRN	1
GO:0006457	protein folding	5/80	203/15278	0.00423286	0.153717	0.140663	CRYAB/P4HB/PRKCSH/PDIA4/ERP29	5		hsa04020	Calcium signaling pathway	3/43	229/6840	0.173297	0.51628	0.467446	RET/ADCY8/RYR2	3
GO:0009147	pyrimidine nucleoside triphosphate metabolic process	2/80	19/15278	0.00437029	0.153717	0.140663	UCK2/NME1	2		hsa00230	Purine metabolism	2/43	122/6840	0.178335	0.51909	0.469989	ADCY8/NME1	2
GO:0009220	pyrimidine ribonucleotide biosynthetic process	2/80	19/15278	0.00437029	0.153717	0.140663	UCK2/NME1	2		hsa04210	Apoptosis	2/43	125/6840	0.18513	0.51909	0.469989	FOS/ATF4	2
GO:0032793	positive regulation of CREB transcription factor activity	2/80	19/15278	0.00437029	0.153717	0.140663	ADCY8/LRP8	2		hsa04728	Dopaminergic synapse	2/43	125/6840	0.18513	0.51909	0.469989	FOS/ATF4	2
GO:0071243	cellular response to arsenic-containing substance	2/80	19/15278	0.00437029	0.153717	0.140663	SLC38A2/ATF4	2		hsa04371	Apelin signaling pathway	2/43	128/6840	0.191964	0.5279	0.477966	ADCY8/RYR2	2
GO:0042698	ovulation cycle	3/80	64/15278	0.0045786	0.158005	0.144587	PAM/PTPRN/OPRL1	3		hsa05135	Yersinia infection	2/43	131/6840	0.198833	0.536474	0.485729	FOS/ARHGEF28	2
GO:0007623	circadian rhythm	5/80	209/15278	0.00478612	0.160934	0.147268	CREM/SIK1/OPRL1/DBP/ATF4	5		hsa05216	Thyroid cancer	1/43	37/6840	0.208602	0.547586	0.49579	RET	1
GO:0046514	ceramide catabolic process	2/80	20/15278	0.00483946	0.160934	0.147268	GLA/GBA	2		hsa00513	Various types of N-glycan biosynthesis	1/43	39/6840	0.218576	0.547586	0.49579	RPN2	1
GO:0031333	negative regulation of protein-containing complex assembly	4/80	131/15278	0.0049395	0.161328	0.147628	CRYAB/FHOD3/GBA/THRA	4		hsa04932	Non-alcoholic fatty liver disease	2/43	140/6840	0.219617	0.547586	0.49579	FOS/ATF4	2
GO:0009218	pyrimidine ribonucleotide metabolic process	2/80	21/15278	0.00533079	0.162203	0.148429	UCK2/NME1	2		hsa05034	Alcoholism	2/43	142/6840	0.224265	0.547586	0.49579	PDYN/ATF4	2
GO:0044342	type B pancreatic cell proliferation	2/80	21/15278	0.00533079	0.162203	0.148429	PTPRN/IGFBP5	2		hsa05224	Breast cancer	2/43	142/6840	0.224265	0.547586	0.49579	FOS/HEYL	2
GO:1903861	positive regulation of dendrite extension	2/80	21/15278	0.00533079	0.162203	0.148429	UNC13A/SYT4	2		hsa05161	Hepatitis B	2/43	144/6840	0.228921	0.547586	0.49579	FOS/ATF4	2
GO:0030879	mammary gland development	4/80	134/15278	0.00535004	0.162203	0.148429	PAM/ETV5/IGFBP5/NME1	4		hsa04913	Ovarian steroidogenesis	1/43	42/6840	0.233306	0.547586	0.49579	ADCY8	1
GO:0051090	regulation of DNA-binding transcription factor activity	7/80	407/15278	0.00540974	0.162203	0.148429	FOS/SIK1/NWD1/ADCY8/LRP8/HEYL/SFRP4	7		hsa04934	Cushing syndrome	2/43	146/6840	0.233586	0.547586	0.49579	ADCY8/ATF4	2
GO:0001956	positive regulation of neurotransmitter secretion	2/80	22/15278	0.00584405	0.167161	0.152966	SYT9/UNC13A	2		hsa00970	Aminoacyl-tRNA biosynthesis	1/43	43/6840	0.238156	0.549295	0.497338	TARS1	1
GO:0042593	glucose homeostasis	5/80	221/15278	0.00604401	0.167161	0.152966	VGF/PTPRN/IGFBP5/ADCY8/NME1	5		hsa00480	Glutathione metabolism	1/43	45/6840	0.247766	0.555557	0.503007	CHAC1	1
GO:0043271	negative regulation of ion transport	4/80	139/15278	0.00608401	0.167161	0.152966	KCNAB1/OPRL1/ATF4/SFRP4	4		hsa04022	cGMP-PKG signaling pathway	2/43	154/6840	0.252303	0.555557	0.503007	ADCY8/ATF4	2
GO:0033500	carbohydrate homeostasis	5/80	222/15278	0.00615838	0.167161	0.152966	VGF/PTPRN/IGFBP5/ADCY8/NME1	5		hsa00330	Arginine and proline metabolism	1/43	46/6840	0.252526	0.555557	0.503007	SAT1	1
GO:0060395	SMAD protein signal transduction	3/80	72/15278	0.00636102	0.167161	0.152966	CITED1/FOS/BTBD11	3		hsa00510	N-Glycan biosynthesis	1/43	49/6840	0.266631	0.574405	0.520072	RPN2	1
GO:0002092	positive regulation of receptor internalization	2/80	23/15278	0.00637901	0.167161	0.152966	CD63/SFRP4	2		hsa04010	MAPK signaling pathway	3/43	287/6840	0.269127	0.574405	0.520072	FOS/EFNA3/ATF4	3
GO:0072215	regulation of metanephros development	2/80	23/15278	0.00637901	0.167161	0.152966	CITED1/RET	2		hsa05202	Transcriptional misregulation in cancer	2/43	167/6840	0.282813	0.590722	0.534846	ETV5/LMO2	2
GO:1903859	regulation of dendrite extension	2/80	23/15278	0.00637901	0.167161	0.152966	UNC13A/SYT4	2		hsa04923	Regulation of lipolysis in adipocytes	1/43	53/6840	0.285034	0.590722	0.534846	ADCY8	1
GO:0051051	negative regulation of transport	7/80	420/15278	0.00639763	0.167161	0.152966	CRYAB/KCNAB1/OPRL1/ERP29/SYT4/ATF4/SFRP4	7		hsa04360	Axon guidance	2/43	172/6840	0.294542	0.601283	0.544408	PLXNA4/EFNA3	2
GO:0006979	response to oxidative stress	7/80	424/15278	0.00672716	0.169132	0.154769	ETV5/FOS/CRYAB/PTPRN/RNF112/P4HB/ATF4	7		hsa00010	Glycolysis / Gluconeogenesis	1/43	56/6840	0.298539	0.601283	0.544408	ALDOC	1
GO:0007178	transmembrane receptor protein serine/threonine kinase signaling pathway	6/80	322/15278	0.00680857	0.169132	0.154769	CITED1/FOS/ACVR1B/BTBD11/CITED2/SFRP4	6		hsa04330	Notch signaling pathway	1/43	57/6840	0.302985	0.601762	0.544842	HEYL	1
GO:0021675	nerve development	3/80	74/15278	0.00686251	0.169132	0.154769	RET/PLXNA4/UNC13A	3		hsa00561	Glycerolipid metabolism	1/43	58/6840	0.307404	0.602175	0.545215	GLA	1
GO:0050927	positive regulation of positive chemotaxis	2/80	24/15278	0.00693542	0.169132	0.154769	SCG2/CDH13	2		hsa04929	GnRH secretion	1/43	61/6840	0.320496	0.602863	0.545839	GABBR2	1
GO:0060384	innervation	2/80	24/15278	0.00693542	0.169132	0.154769	RET/UNC13A	2		hsa05140	Leishmaniasis	1/43	64/6840	0.333347	0.602863	0.545839	FOS	1
GO:0050926	regulation of positive chemotaxis	2/80	25/15278	0.00751305	0.180808	0.165454	SCG2/CDH13	2		hsa05230	Central carbon metabolism in cancer	1/43	64/6840	0.333347	0.602863	0.545839	RET	1
GO:0031668	cellular response to extracellular stimulus	5/80	236/15278	0.00792376	0.182306	0.166825	FOS/SLC38A2/SIK1/GBA/ATF4	5		hsa05163	Human cytomegalovirus infection	2/43	190/6840	0.336534	0.602863	0.545839	ADCY8/ATF4	2
GO:0009267	cellular response to starvation	4/80	150/15278	0.00792818	0.182306	0.166825	SLC38A2/SIK1/GBA/ATF4	4		hsa04917	Prolactin signaling pathway	1/43	65/6840	0.337577	0.602863	0.545839	FOS	1
GO:0050804	modulation of chemical synaptic transmission	7/80	439/15278	0.00807675	0.182306	0.166825	VGF/SYT9/ADCY8/LRP8/UNC13A/SYT4/ATF4	7		hsa04662	B cell receptor signaling pathway	1/43	67/6840	0.34596	0.602863	0.545839	FOS	1
GO:0006221	pyrimidine nucleotide biosynthetic process	2/80	26/15278	0.00811168	0.182306	0.166825	UCK2/NME1	2		hsa04976	Bile secretion	1/43	67/6840	0.34596	0.602863	0.545839	ADCY8	1
GO:0097066	response to thyroid hormone	2/80	26/15278	0.00811168	0.182306	0.166825	LMO2/GBA	2		hsa05223	Non-small cell lung cancer	1/43	69/6840	0.354239	0.602863	0.545839	RET	1
GO:0099177	regulation of trans-synaptic signaling	7/80	440/15278	0.00817335	0.182306	0.166825	VGF/SYT9/ADCY8/LRP8/UNC13A/SYT4/ATF4	7		hsa01230	Biosynthesis of amino acids	1/43	70/6840	0.35834	0.602863	0.545839	ALDOC	1
GO:0043433	negative regulation of DNA-binding transcription factor activity	4/80	154/15278	0.0086806	0.186869	0.171001	SIK1/NWD1/HEYL/SFRP4	4		hsa05133	Pertussis	1/43	70/6840	0.35834	0.602863	0.545839	FOS	1
GO:0007214	gamma-aminobutyric acid signaling pathway	2/80	27/15278	0.00873107	0.186869	0.171001	GABBR2/ATF4	2		hsa05200	Pathways in cancer	4/43	486/6840	0.3655	0.602863	0.545839	FOS/RET/ADCY8/HEYL	4
GO:0051590	positive regulation of neurotransmitter transport	2/80	27/15278	0.00873107	0.186869	0.171001	SYT9/UNC13A	2		hsa04971	Gastric acid secretion	1/43	72/6840	0.366466	0.602863	0.545839	ADCY8	1
GO:0036293	response to decreased oxygen levels	6/80	340/15278	0.00878665	0.186869	0.171001	PAM/CRYAB/P4HB/RYR2/CITED2/ATF4	6		hsa04015	Rap1 signaling pathway	2/43	204/6840	0.368747	0.602863	0.545839	ADCY8/EFNA3	2
GO:0030511	positive regulation of transforming growth factor beta receptor signaling pathway	2/80	28/15278	0.00937099	0.193229	0.17682	CITED1/CITED2	2		hsa04970	Salivary secretion	1/43	73/6840	0.370491	0.602863	0.545839	ADCY8	1
GO:1903846	positive regulation of cellular response to transforming growth factor beta stimulus	2/80	28/15278	0.00937099	0.193229	0.17682	CITED1/CITED2	2		hsa04721	Synaptic vesicle cycle	1/43	75/6840	0.378466	0.602863	0.545839	UNC13A	1
GO:0043687	post-translational protein modification	6/80	345/15278	0.00940259	0.193229	0.17682	VGF/IGFBP5/P4HB/SCG2/PRKCSH/SCG3	6		hsa05323	Rheumatoid arthritis	1/43	75/6840	0.378466	0.602863	0.545839	FOS	1
GO:0030149	sphingolipid catabolic process	2/80	30/15278	0.0107115	0.21529	0.197008	GLA/GBA	2		hsa05412	Arrhythmogenic right ventricular cardiomyopathy	1/43	76/6840	0.382417	0.602863	0.545839	RYR2	1
GO:0031338	regulation of vesicle fusion	2/80	30/15278	0.0107115	0.21529	0.197008	SYT9/SYT4	2		hsa04260	Cardiac muscle contraction	1/43	80/6840	0.397975	0.602863	0.545839	RYR2	1
GO:0014706	striated muscle tissue development	6/80	356/15278	0.0108657	0.216015	0.197672	FOS/KCNAB1/SIK1/FHOD3/RYR2/HEYL	6		hsa04540	Gap junction	1/43	80/6840	0.397975	0.602863	0.545839	ADCY8	1
GO:0006094	gluconeogenesis	3/80	88/15278	0.0110267	0.216857	0.198442	SIK1/ALDOC/ATF4	3		hsa04657	IL-17 signaling pathway	1/43	81/6840	0.401805	0.602863	0.545839	FOS	1
GO:0071312	cellular response to alkaloid	2/80	31/15278	0.0114117	0.21958	0.200933	ADCY8/RYR2	2		hsa04620	Toll-like receptor signaling pathway	1/43	82/6840	0.405611	0.602863	0.545839	FOS	1
GO:0010959	regulation of metal ion transport	6/80	361/15278	0.0115816	0.21958	0.200933	CD63/KCNAB1/SIK1/OPRL1/RYR2/ATF4	6		hsa04658	Th1 and Th2 cell differentiation	1/43	84/6840	0.413151	0.602863	0.545839	FOS	1
GO:0036473	cell death in response to oxidative stress	3/80	90/15278	0.0117173	0.21958	0.200933	RNF112/P4HB/ATF4	3		hsa04914	Progesterone-mediated oocyte maturation	1/43	84/6840	0.413151	0.602863	0.545839	ADCY8	1
GO:0070482	response to oxygen levels	6/80	364/15278	0.0120269	0.21958	0.200933	PAM/CRYAB/P4HB/RYR2/CITED2/ATF4	6		hsa05210	Colorectal cancer	1/43	84/6840	0.413151	0.602863	0.545839	FOS	1
GO:0019319	hexose biosynthetic process	3/80	91/15278	0.0120718	0.21958	0.200933	SIK1/ALDOC/ATF4	3		hsa05235	PD-L1 expression and PD-1 checkpoint pathway in cancer	1/43	84/6840	0.413151	0.602863	0.545839	FOS	1
GO:0009991	response to extracellular stimulus	7/80	475/15278	0.0121237	0.21958	0.200933	VGF/FOS/SLC38A2/SIK1/NUCB2/GBA/ATF4	7		hsa04350	TGF-beta signaling pathway	1/43	87/6840	0.424287	0.611972	0.554086	ACVR1B	1
GO:0046685	response to arsenic-containing substance	2/80	32/15278	0.0121315	0.21958	0.200933	SLC38A2/ATF4	2		hsa05410	Hypertrophic cardiomyopathy	1/43	88/6840	0.427953	0.611972	0.554086	RYR2	1
GO:0042493	response to drug	6/80	367/15278	0.0124842	0.21958	0.200933	PAM/FOS/RET/NME1/LRP8/RPN2	6		hsa05020	Prion disease	2/43	234/6840	0.43568	0.616853	0.558505	RYR2/ATF4	2
GO:0097193	intrinsic apoptotic signaling pathway	5/80	266/15278	0.0128374	0.21958	0.200933	AEN/P4HB/ERP29/CHAC1/ATF4	5		hsa04750	Inflammatory mediator regulation of TRP channels	1/43	92/6840	0.44239	0.620213	0.561547	ADCY8	1
GO:0016486	peptide hormone processing	2/80	33/15278	0.0128707	0.21958	0.200933	PCSK1/PCSK2	2		hsa05231	Choline metabolism in cancer	1/43	94/6840	0.449474	0.621669	0.562866	FOS	1
GO:0043267	negative regulation of potassium ion transport	2/80	33/15278	0.0128707	0.21958	0.200933	KCNAB1/ATF4	2		hsa04916	Melanogenesis	1/43	95/6840	0.452983	0.621669	0.562866	ADCY8	1
GO:0140448	signaling receptor ligand precursor processing	2/80	33/15278	0.0128707	0.21958	0.200933	PCSK1/PCSK2	2		hsa05142	Chagas disease	1/43	96/6840	0.45647	0.621669	0.562866	FOS	1
GO:0031346	positive regulation of cell projection organization	6/80	373/15278	0.0134353	0.21958	0.200933	RET/NME1/PLXNA4/LRP8/UNC13A/SYT4	6		hsa04659	Th17 cell differentiation	1/43	98/6840	0.46338	0.625126	0.565995	FOS	1
GO:0033363	secretory granule organization	2/80	34/15278	0.0136291	0.21958	0.200933	PTPRN/SYT4	2		hsa04660	T cell receptor signaling pathway	1/43	101/6840	0.473584	0.63292	0.573053	FOS	1
GO:0097484	dendrite extension	2/80	34/15278	0.0136291	0.21958	0.200933	UNC13A/SYT4	2		hsa04066	HIF-1 signaling pathway	1/43	104/6840	0.483598	0.640319	0.579752	ALDOC	1
GO:0021700	developmental maturation	5/80	271/15278	0.0138198	0.21958	0.200933	CD63/PTPRN/RET/UNC13A/SYT4	5		hsa04114	Oocyte meiosis	1/43	108/6840	0.496661	0.648608	0.587257	ADCY8	1
GO:0043266	regulation of potassium ion transport	3/80	96/15278	0.0139365	0.21958	0.200933	CD63/KCNAB1/ATF4	3		hsa04380	Osteoclast differentiation	1/43	109/6840	0.499876	0.648608	0.587257	FOS	1
GO:0044070	regulation of anion transport	3/80	97/15278	0.014328	0.21958	0.200933	SYT4/ATF4/SFRP4	3		hsa05022	Pathways of neurodegeneration - multiple diseases	3/43	426/6840	0.506856	0.648608	0.587257	PDYN/RYR2/ATF4	3
GO:0046364	monosaccharide biosynthetic process	3/80	97/15278	0.014328	0.21958	0.200933	SIK1/ALDOC/ATF4	3		hsa01200	Carbon metabolism	1/43	112/6840	0.509401	0.648608	0.587257	ALDOC	1
GO:0046545	development of primary female sexual characteristics	3/80	97/15278	0.014328	0.21958	0.200933	VGF/PTPRN/ACVR1B	3		hsa04722	Neurotrophin signaling pathway	1/43	113/6840	0.512537	0.648608	0.587257	ATF4	1
GO:0009163	nucleoside biosynthetic process	2/80	35/15278	0.0144065	0.21958	0.200933	UCK2/NME1	2		hsa04611	Platelet activation	1/43	116/6840	0.521826	0.650802	0.589243	ADCY8	1
GO:0014046	dopamine secretion	2/80	35/15278	0.0144065	0.21958	0.200933	SYT9/SYT4	2		hsa05162	Measles	1/43	117/6840	0.524884	0.650802	0.589243	FOS	1
GO:0014059	regulation of dopamine secretion	2/80	35/15278	0.0144065	0.21958	0.200933	SYT9/SYT4	2		hsa04919	Thyroid hormone signaling pathway	1/43	118/6840	0.527923	0.650802	0.589243	THRA	1
GO:0046466	membrane lipid catabolic process	2/80	35/15278	0.0144065	0.21958	0.200933	GLA/GBA	2		hsa05418	Fluid shear stress and atherosclerosis	1/43	122/6840	0.53989	0.659865	0.597449	FOS	1
GO:0050931	pigment cell differentiation	2/80	35/15278	0.0144065	0.21958	0.200933	CITED1/CD63	2		hsa04270	Vascular smooth muscle contraction	1/43	125/6840	0.54867	0.664913	0.602019	ADCY8	1
GO:0072528	pyrimidine-containing compound biosynthetic process	2/80	35/15278	0.0144065	0.21958	0.200933	UCK2/NME1	2		hsa04514	Cell adhesion molecules	1/43	127/6840	0.554432	0.66625	0.60323	LRRC4B	1
GO:1901658	glycosyl compound catabolic process	2/80	35/15278	0.0144065	0.21958	0.200933	GLA/GBA	2		hsa01240	Biosynthesis of cofactors	1/43	130/6840	0.562941	0.670554	0.607127	NME1	1
GO:1904019	epithelial cell apoptotic process	3/80	99/15278	0.0151296	0.227194	0.207901	SCG2/RYR2/SFRP4	3		hsa05017	Spinocerebellar ataxia	1/43	133/6840	0.571291	0.670554	0.607127	PDYN	1
GO:0072210	metanephric nephron development	2/80	36/15278	0.0152027	0.227194	0.207901	CITED1/RET	2		hsa04550	Signaling pathways regulating pluripotency of stem cells	1/43	134/6840	0.574039	0.670554	0.607127	ACVR1B	1
GO:0034976	response to endoplasmic reticulum stress	5/80	278/15278	0.0152788	0.227194	0.207901	P4HB/PDIA4/ERP29/CHAC1/ATF4	5		hsa04723	Retrograde endocannabinoid signaling	1/43	135/6840	0.57677	0.670554	0.607127	ADCY8	1
GO:0006664	glycolipid metabolic process	3/80	101/15278	0.0159562	0.231753	0.212073	CREM/GLA/GBA	3		hsa04072	Phospholipase D signaling pathway	1/43	139/6840	0.587526	0.67755	0.613461	ADCY8	1
GO:0090100	positive regulation of transmembrane receptor protein serine/threonine kinase signaling pathway	3/80	101/15278	0.0159562	0.231753	0.212073	CITED1/ACVR1B/CITED2	3		hsa04151	PI3K-Akt signaling pathway	2/43	320/6840	0.604511	0.69156	0.626146	EFNA3/ATF4	2
GO:1901659	glycosyl compound biosynthetic process	2/80	37/15278	0.0160175	0.231753	0.212073	UCK2/NME1	2		hsa04150	mTOR signaling pathway	1/43	151/6840	0.618215	0.701625	0.635258	SLC3A2	1
GO:0050679	positive regulation of epithelial cell proliferation	4/80	185/15278	0.0161237	0.231753	0.212073	PTPRN/SCG2/CDH13/NME1	4		hsa04310	Wnt signaling pathway	1/43	155/6840	0.62794	0.70705	0.640171	SFRP4	1
GO:0001558	regulation of cell growth	6/80	389/15278	0.0162189	0.231753	0.212073	CRYAB/IGFBP5/ACVR1B/PLXNA4/UNC13A/SYT4	6		hsa05167	Kaposi sarcoma-associated herpesvirus infection	1/43	158/6840	0.635074	0.709497	0.642386	FOS	1
GO:1903509	liposaccharide metabolic process	3/80	102/15278	0.0163789	0.232225	0.212505	CREM/GLA/GBA	3		hsa04062	Chemokine signaling pathway	1/43	165/6840	0.651206	0.72188	0.653597	ADCY8	1
GO:0046928	regulation of neurotransmitter secretion	3/80	103/15278	0.0168078	0.236473	0.216392	SYT9/UNC13A/SYT4	3		hsa05203	Viral carcinogenesis	1/43	170/6840	0.6623	0.72853	0.659619	ATF4	1
GO:1901654	response to ketone	4/80	188/15278	0.0170045	0.237413	0.217253	FOS/ADCY8/NME1/GBA	4		hsa05130	Pathogenic Escherichia coli infection	1/43	173/6840	0.66879	0.730053	0.660998	FOS	1
GO:0034599	cellular response to oxidative stress	5/80	288/15278	0.0175373	0.242998	0.222363	ETV5/FOS/RNF112/P4HB/ATF4	5		hsa05170	Human immunodeficiency virus 1 infection	1/43	180/6840	0.683464	0.740419	0.670383	FOS	1
GO:1902991	regulation of amyloid precursor protein catabolic process	2/80	39/15278	0.0177017	0.243432	0.22276	UNC13A/EFNA3	2		hsa05171	Coronavirus disease - COVID-19	1/43	184/6840	0.691562	0.743559	0.673226	FOS	1
GO:0042594	response to starvation	4/80	193/15278	0.0185384	0.247928	0.226875	SLC38A2/SIK1/GBA/ATF4	4		hsa05205	Proteoglycans in cancer	1/43	200/6840	0.721977	0.770318	0.697454	CD63	1
GO:0006220	pyrimidine nucleotide metabolic process	2/80	40/15278	0.0185709	0.247928	0.226875	UCK2/NME1	2		hsa04714	Thermogenesis	1/43	205/6840	0.730866	0.770318	0.697454	ADCY8	1
GO:0009268	response to pH	2/80	40/15278	0.0185709	0.247928	0.226875	PAM/GBA	2		hsa05206	MicroRNAs in cancer	1/43	206/6840	0.73261	0.770318	0.697454	EFNA3	1
GO:0033574	response to testosterone	2/80	40/15278	0.0185709	0.247928	0.226875	NME1/GBA	2		hsa05012	Parkinson disease	1/43	212/6840	0.742846	0.775379	0.702036	ATF4	1
GO:0030100	regulation of endocytosis	4/80	194/15278	0.0188552	0.2499	0.228679	CD63/CDH13/SYT4/SFRP4	4		hsa04014	Ras signaling pathway	1/43	221/6840	0.757486	0.784931	0.710684	EFNA3	1
GO:0017158	regulation of calcium ion-dependent exocytosis	2/80	41/15278	0.0194578	0.252399	0.230966	SYT9/SYT4	2		hsa05132	Salmonella infection	1/43	225/6840	0.763728	0.785706	0.711386	FOS	1
GO:0032924	activin receptor signaling pathway	2/80	41/15278	0.0194578	0.252399	0.230966	ACVR1B/CITED2	2		hsa04060	Cytokine-cytokine receptor interaction	1/43	241/6840	0.787164	0.804032	0.727979	ACVR1B	1
GO:0048483	autonomic nervous system development	2/80	41/15278	0.0194578	0.252399	0.230966	RET/PLXNA4	2		hsa05165	Human papillomavirus infection	1/43	298/6840	0.853608	0.865716	0.783828	HEYL	1
GO:0046660	female sex differentiation	3/80	110/15278	0.0199865	0.256844	0.235033	VGF/PTPRN/ACVR1B	3		hsa05014	Amyotrophic lateral sclerosis	1/43	320/6840	0.873407	0.879558	0.796361	ATF4	1
GO:0015804	neutral amino acid transport	2/80	42/15278	0.0203621	0.256844	0.235033	SLC38A2/SLC3A2	2		hsa05010	Alzheimer disease	1/43	329/6840	0.880731	0.880731	0.797423	ATF4	1
GO:0042149	cellular response to glucose starvation	2/80	42/15278	0.0203621	0.256844	0.235033	SIK1/ATF4	2
GO:0060412	ventricular septum morphogenesis	2/80	42/15278	0.0203621	0.256844	0.235033	HEYL/CITED2	2
GO:2001258	negative regulation of cation channel activity	2/80	43/15278	0.0212838	0.26393	0.241518	KCNAB1/OPRL1	2
GO:0030073	insulin secretion	4/80	202/15278	0.021511	0.26393	0.241518	VGF/PTPRN/SYT9/ADCY8	4
GO:0071496	cellular response to external stimulus	5/80	305/15278	0.0218671	0.26393	0.241518	FOS/SLC38A2/SIK1/GBA/ATF4	5
GO:0006006	glucose metabolic process	4/80	204/15278	0.0222091	0.26393	0.241518	CREM/SIK1/ALDOC/ATF4	4
GO:0014047	glutamate secretion	2/80	44/15278	0.0222227	0.26393	0.241518	SLC38A2/SYT4	2
GO:0019748	secondary metabolic process	2/80	44/15278	0.0222227	0.26393	0.241518	CITED1/PAM	2
GO:0022602	ovulation cycle process	2/80	44/15278	0.0222227	0.26393	0.241518	PAM/PTPRN	2
GO:0034198	cellular response to amino acid starvation	2/80	44/15278	0.0222227	0.26393	0.241518	SLC38A2/ATF4	2
GO:0060443	mammary gland morphogenesis	2/80	44/15278	0.0222227	0.26393	0.241518	ETV5/IGFBP5	2
GO:0031669	cellular response to nutrient levels	4/80	205/15278	0.0225632	0.264539	0.242075	SLC38A2/SIK1/GBA/ATF4	4
GO:0045137	development of primary sexual characteristics	4/80	205/15278	0.0225632	0.264539	0.242075	VGF/PTPRN/ACVR1B/CITED2	4
GO:0016079	synaptic vesicle exocytosis	3/80	116/15278	0.0229571	0.26575	0.243183	SYT9/UNC13A/SYT4	3
GO:0042752	regulation of circadian rhythm	3/80	116/15278	0.0229571	0.26575	0.243183	CREM/SIK1/OPRL1	3
GO:0048066	developmental pigmentation	2/80	45/15278	0.0231784	0.266096	0.243499	CITED1/CD63	2
GO:0045667	regulation of osteoblast differentiation	3/80	117/15278	0.0234743	0.266096	0.243499	CITED1/IGFBP5/ATF4	3
GO:0051588	regulation of neurotransmitter transport	3/80	117/15278	0.0234743	0.266096	0.243499	SYT9/UNC13A/SYT4	3
GO:0007156	homophilic cell adhesion via plasma membrane adhesion molecules	3/80	118/15278	0.0239979	0.266096	0.243499	RET/CDH13/PTPRT	3
GO:0051047	positive regulation of secretion	5/80	313/15278	0.0241263	0.266096	0.243499	SYT9/OPRL1/ADCY8/UNC13A/SYT4	5
GO:0007595	lactation	2/80	46/15278	0.0241508	0.266096	0.243499	PAM/NME1	2
GO:0045668	negative regulation of osteoblast differentiation	2/80	46/15278	0.0241508	0.266096	0.243499	CITED1/IGFBP5	2
GO:0050919	negative chemotaxis	2/80	46/15278	0.0241508	0.266096	0.243499	LRTM2/PLXNA4	2
GO:0009266	response to temperature stimulus	4/80	212/15278	0.0251394	0.272075	0.248971	VGF/FOS/CRYAB/THRA	4
GO:0070741	response to interleukin-6	2/80	47/15278	0.0251398	0.272075	0.248971	CITED1/PTPRT	2
GO:1990928	response to amino acid starvation	2/80	47/15278	0.0251398	0.272075	0.248971	SLC38A2/ATF4	2
GO:0002576	platelet degranulation	3/80	121/15278	0.0256065	0.275495	0.252101	CD63/SCG3/ANXA5	3
GO:0000302	response to reactive oxygen species	4/80	214/15278	0.0259068	0.27652	0.253039	FOS/CRYAB/PTPRN/RNF112	4
GO:0048168	regulation of neuronal synaptic plasticity	2/80	48/15278	0.0261451	0.27652	0.253039	UNC13A/SYT4	2
GO:0003231	cardiac ventricle development	3/80	122/15278	0.0261553	0.27652	0.253039	RYR2/HEYL/CITED2	3
GO:0050708	regulation of protein secretion	5/80	321/15278	0.0265316	0.277113	0.253581	PAM/SYT9/ERP29/ADCY8/SYT4	5
GO:0098742	cell-cell adhesion via plasma-membrane adhesion molecules	4/80	216/15278	0.0266882	0.277113	0.253581	RET/CDH13/LRRC4B/PTPRT	4
GO:0071333	cellular response to glucose stimulus	3/80	123/15278	0.0267104	0.277113	0.253581	PTPRN/ADCY8/NME1	3
GO:0015872	dopamine transport	2/80	49/15278	0.0271665	0.277113	0.253581	SYT9/SYT4	2
GO:0042987	amyloid precursor protein catabolic process	2/80	49/15278	0.0271665	0.277113	0.253581	UNC13A/EFNA3	2
GO:0048260	positive regulation of receptor-mediated endocytosis	2/80	49/15278	0.0271665	0.277113	0.253581	CD63/SFRP4	2
GO:0003206	cardiac chamber morphogenesis	3/80	124/15278	0.0272719	0.277113	0.253581	RYR2/HEYL/CITED2	3
GO:0071331	cellular response to hexose stimulus	3/80	125/15278	0.0278396	0.280912	0.257057	PTPRN/ADCY8/NME1	3
GO:0007528	neuromuscular junction development	2/80	50/15278	0.0282039	0.280912	0.257057	ETV5/UNC13A	2
GO:0031667	response to nutrient levels	6/80	442/15278	0.0282524	0.280912	0.257057	VGF/SLC38A2/SIK1/NUCB2/GBA/ATF4	6
GO:0050807	regulation of synapse organization	4/80	220/15278	0.0282934	0.280912	0.257057	ETV5/LRTM2/LRRC4B/LRP8	4
GO:0071326	cellular response to monosaccharide stimulus	3/80	126/15278	0.0284137	0.280912	0.257057	PTPRN/ADCY8/NME1	3
GO:0001666	response to hypoxia	5/80	328/15278	0.0287584	0.282791	0.258777	PAM/CRYAB/P4HB/RYR2/CITED2	5
GO:0090183	regulation of kidney development	2/80	51/15278	0.029257	0.284633	0.260463	CITED1/RET	2
GO:1903307	positive regulation of regulated secretory pathway	2/80	51/15278	0.029257	0.284633	0.260463	SYT9/SYT4	2
GO:0006813	potassium ion transport	4/80	223/15278	0.0295344	0.285812	0.261541	CD63/KCNQ2/KCNAB1/ATF4	4
GO:0002090	regulation of receptor internalization	2/80	52/15278	0.0303257	0.287387	0.262982	CD63/SFRP4	2
GO:0050433	regulation of catecholamine secretion	2/80	52/15278	0.0303257	0.287387	0.262982	SYT9/SYT4	2
GO:0098900	regulation of action potential	2/80	52/15278	0.0303257	0.287387	0.262982	RYR2/GBA	2
GO:1903793	positive regulation of anion transport	2/80	52/15278	0.0303257	0.287387	0.262982	SYT4/ATF4	2
GO:0050878	regulation of body fluid levels	6/80	452/15278	0.0310471	0.292707	0.267851	PAM/OPRL1/ADCY8/NME1/GBA/ANXA5	6
GO:0016049	cell growth	6/80	453/15278	0.0313362	0.293672	0.268734	CRYAB/IGFBP5/ACVR1B/PLXNA4/UNC13A/SYT4	6
GO:0006814	sodium ion transport	4/80	228/15278	0.0316739	0.293672	0.268734	SLC38A2/SIK1/SLC3A2/SLC20A1	4
GO:0090092	regulation of transmembrane receptor protein serine/threonine kinase signaling pathway	4/80	228/15278	0.0316739	0.293672	0.268734	CITED1/ACVR1B/CITED2/SFRP4	4
GO:0062197	cellular response to chemical stress	5/80	337/15278	0.0317918	0.293672	0.268734	ETV5/FOS/RNF112/P4HB/ATF4	5
GO:0050432	catecholamine secretion	2/80	54/15278	0.0325089	0.296717	0.27152	SYT9/SYT4	2
GO:0072006	nephron development	3/80	133/15278	0.032608	0.296717	0.27152	CITED1/RET/HEYL	3
GO:0072073	kidney epithelium development	3/80	133/15278	0.032608	0.296717	0.27152	CITED1/RET/HEYL	3
GO:0050803	regulation of synapse structure or activity	4/80	231/15278	0.0330005	0.29795	0.272648	ETV5/LRTM2/LRRC4B/LRP8	4
GO:0032355	response to estradiol	3/80	134/15278	0.0332322	0.29795	0.272648	PAM/CRYAB/OPRL1	3
GO:0071322	cellular response to carbohydrate stimulus	3/80	134/15278	0.0332322	0.29795	0.272648	PTPRN/ADCY8/NME1	3
GO:0001889	liver development	3/80	135/15278	0.0338627	0.300572	0.275048	PRKCSH/CITED2/DBP	3
GO:0050918	positive chemotaxis	2/80	56/15278	0.0347522	0.300572	0.275048	SCG2/CDH13	2
GO:0051384	response to glucocorticoid	3/80	137/15278	0.0351423	0.300572	0.275048	PAM/FOS/GBA	3
GO:0021537	telencephalon development	4/80	236/15278	0.0352831	0.300572	0.275048	SLC38A2/NME1/PLXNA4/LRP8	4
GO:0002791	regulation of peptide secretion	5/80	348/15278	0.0357637	0.300572	0.275048	PAM/SYT9/ERP29/ADCY8/SYT4	5
GO:0061008	hepaticobiliary system development	3/80	138/15278	0.0357914	0.300572	0.275048	PRKCSH/CITED2/DBP	3
GO:0001678	cellular glucose homeostasis	3/80	139/15278	0.0364467	0.300572	0.275048	PTPRN/ADCY8/NME1	3
GO:0010817	regulation of hormone levels	6/80	470/15278	0.0365242	0.300572	0.275048	VGF/PCSK1/PTPRN/SYT9/PCSK2/ADCY8	6
GO:2000378	negative regulation of reactive oxygen species metabolic process	2/80	58/15278	0.037054	0.300572	0.275048	CRYAB/GLA	2
GO:0019318	hexose metabolic process	4/80	240/15278	0.037174	0.300572	0.275048	CREM/SIK1/ALDOC/ATF4	4
GO:0022604	regulation of cell morphogenesis	6/80	475/15278	0.0381497	0.300572	0.275048	RET/P4HB/PLXNA4/LRP8/UNC13A/SYT4	6
GO:0009201	ribonucleoside triphosphate biosynthetic process	2/80	59/15278	0.0382265	0.300572	0.275048	UCK2/NME1	2
GO:0045454	cell redox homeostasis	2/80	59/15278	0.0382265	0.300572	0.275048	P4HB/PDIA4	2
GO:0030072	peptide hormone secretion	4/80	244/15278	0.0391225	0.300572	0.275048	VGF/PTPRN/SYT9/ADCY8	4
GO:0032835	glomerulus development	2/80	60/15278	0.039413	0.300572	0.275048	RET/HEYL	2
GO:0030522	intracellular receptor signaling pathway	4/80	245/15278	0.0396187	0.300572	0.275048	CREM/HEYL/THRA/CITED2	4
GO:0035773	insulin secretion involved in cellular response to glucose stimulus	2/80	61/15278	0.0406134	0.300572	0.275048	PTPRN/ADCY8	2
GO:0031646	positive regulation of nervous system process	2/80	62/15278	0.0418276	0.300572	0.275048	OPRL1/GBA	2
GO:0051965	positive regulation of synapse assembly	2/80	62/15278	0.0418276	0.300572	0.275048	LRTM2/LRRC4B	2
GO:0006865	amino acid transport	3/80	147/15278	0.0419108	0.300572	0.275048	SLC38A2/SLC3A2/SYT4	3
GO:0007548	sex differentiation	4/80	250/15278	0.0421537	0.300572	0.275048	VGF/PTPRN/ACVR1B/CITED2	4
GO:0007519	skeletal muscle tissue development	3/80	148/15278	0.0426214	0.300572	0.275048	FOS/KCNAB1/HEYL	3
GO:0035914	skeletal muscle cell differentiation	2/80	63/15278	0.0430554	0.300572	0.275048	FOS/HEYL	2
GO:0050891	multicellular organismal water homeostasis	2/80	63/15278	0.0430554	0.300572	0.275048	ADCY8/GBA	2
GO:0007517	muscle organ development	5/80	367/15278	0.0433227	0.300572	0.275048	FOS/CRYAB/KCNAB1/RYR2/HEYL	5
GO:0010770	positive regulation of cell morphogenesis involved in differentiation	3/80	149/15278	0.043338	0.300572	0.275048	P4HB/PLXNA4/LRP8	3
GO:0010975	regulation of neuron projection development	6/80	491/15278	0.0436612	0.300572	0.275048	RET/NME1/PLXNA4/LRP8/UNC13A/SYT4	6
GO:0006665	sphingolipid metabolic process	3/80	151/15278	0.0447893	0.300572	0.275048	CREM/GLA/GBA	3
GO:0031960	response to corticosteroid	3/80	152/15278	0.045524	0.300572	0.275048	PAM/FOS/GBA	3
GO:0032413	negative regulation of ion transmembrane transporter activity	2/80	65/15278	0.045551	0.300572	0.275048	KCNAB1/OPRL1	2
GO:0003208	cardiac ventricle morphogenesis	2/80	67/15278	0.0480989	0.300572	0.275048	RYR2/HEYL	2
GO:0021543	pallium development	3/80	156/15278	0.0485227	0.300572	0.275048	SLC38A2/NME1/LRP8	3
GO:0015807	L-amino acid transport	2/80	68/15278	0.049392	0.300572	0.275048	SLC38A2/SLC3A2	2
GO:0042982	amyloid precursor protein metabolic process	2/80	68/15278	0.049392	0.300572	0.275048	UNC13A/EFNA3	2
GO:0005996	monosaccharide metabolic process	4/80	264/15278	0.049732	0.300572	0.275048	CREM/SIK1/ALDOC/ATF4	4
GO:0060538	skeletal muscle organ development	3/80	158/15278	0.0500578	0.300572	0.275048	FOS/KCNAB1/HEYL	3
GO:0015800	acidic amino acid transport	2/80	69/15278	0.0506977	0.300572	0.275048	SLC38A2/SYT4	2
GO:0051937	catecholamine transport	2/80	69/15278	0.0506977	0.300572	0.275048	SYT9/SYT4	2
GO:0001553	luteinization	1/80	10/15278	0.0511608	0.300572	0.275048	PTPRN	1
GO:0006171	cAMP biosynthetic process	1/80	10/15278	0.0511608	0.300572	0.275048	ADCY8	1
GO:0006222	UMP biosynthetic process	1/80	10/15278	0.0511608	0.300572	0.275048	UCK2	1
GO:0008655	pyrimidine-containing compound salvage	1/80	10/15278	0.0511608	0.300572	0.275048	UCK2	1
GO:0009173	pyrimidine ribonucleoside monophosphate metabolic process	1/80	10/15278	0.0511608	0.300572	0.275048	UCK2	1
GO:0009174	pyrimidine ribonucleoside monophosphate biosynthetic process	1/80	10/15278	0.0511608	0.300572	0.275048	UCK2	1
GO:0014041	regulation of neuron maturation	1/80	10/15278	0.0511608	0.300572	0.275048	RET	1
GO:0015697	quaternary ammonium group transport	1/80	10/15278	0.0511608	0.300572	0.275048	SLC38A2	1
GO:0015808	L-alanine transport	1/80	10/15278	0.0511608	0.300572	0.275048	SLC3A2	1
GO:0016081	synaptic vesicle docking	1/80	10/15278	0.0511608	0.300572	0.275048	UNC13A	1
GO:0019755	one-carbon compound transport	1/80	10/15278	0.0511608	0.300572	0.275048	SLC14A1	1
GO:0021559	trigeminal nerve development	1/80	10/15278	0.0511608	0.300572	0.275048	PLXNA4	1
GO:0021561	facial nerve development	1/80	10/15278	0.0511608	0.300572	0.275048	PLXNA4	1
GO:0021604	cranial nerve structural organization	1/80	10/15278	0.0511608	0.300572	0.275048	PLXNA4	1
GO:0021610	facial nerve morphogenesis	1/80	10/15278	0.0511608	0.300572	0.275048	PLXNA4	1
GO:0030202	heparin metabolic process	1/80	10/15278	0.0511608	0.300572	0.275048	GLCE	1
GO:0030259	lipid glycosylation	1/80	10/15278	0.0511608	0.300572	0.275048	GBA	1
GO:0030388	fructose 1,6-bisphosphate metabolic process	1/80	10/15278	0.0511608	0.300572	0.275048	ALDOC	1
GO:0031630	regulation of synaptic vesicle fusion to presynaptic active zone membrane	1/80	10/15278	0.0511608	0.300572	0.275048	SYT9	1
GO:0035860	glial cell-derived neurotrophic factor receptor signaling pathway	1/80	10/15278	0.0511608	0.300572	0.275048	RET	1
GO:0042789	mRNA transcription by RNA polymerase II	1/80	10/15278	0.0511608	0.300572	0.275048	ATF4	1
GO:0043097	pyrimidine nucleoside salvage	1/80	10/15278	0.0511608	0.300572	0.275048	UCK2	1
GO:0046049	UMP metabolic process	1/80	10/15278	0.0511608	0.300572	0.275048	UCK2	1
GO:0071104	response to interleukin-9	1/80	10/15278	0.0511608	0.300572	0.275048	CITED1	1
GO:0086016	AV node cell action potential	1/80	10/15278	0.0511608	0.300572	0.275048	RYR2	1
GO:0086027	AV node cell to bundle of His cell signaling	1/80	10/15278	0.0511608	0.300572	0.275048	RYR2	1
GO:0086070	SA node cell to atrial cardiac muscle cell communication	1/80	10/15278	0.0511608	0.300572	0.275048	RYR2	1
GO:0090649	response to oxygen-glucose deprivation	1/80	10/15278	0.0511608	0.300572	0.275048	ATF4	1
GO:0097050	type B pancreatic cell apoptotic process	1/80	10/15278	0.0511608	0.300572	0.275048	RYR2	1
GO:0098722	asymmetric stem cell division	1/80	10/15278	0.0511608	0.300572	0.275048	ETV5	1
GO:1902287	semaphorin-plexin signaling pathway involved in axon guidance	1/80	10/15278	0.0511608	0.300572	0.275048	PLXNA4	1
GO:1903431	positive regulation of cell maturation	1/80	10/15278	0.0511608	0.300572	0.275048	RET	1
GO:1905245	regulation of aspartic-type peptidase activity	1/80	10/15278	0.0511608	0.300572	0.275048	EFNA3	1
GO:1905461	positive regulation of vascular associated smooth muscle cell apoptotic process	1/80	10/15278	0.0511608	0.300572	0.275048	ATF4	1
GO:2001241	positive regulation of extrinsic apoptotic signaling pathway in absence of ligand	1/80	10/15278	0.0511608	0.300572	0.275048	RET	1
GO:0009142	nucleoside triphosphate biosynthetic process	2/80	70/15278	0.0520158	0.300572	0.275048	UCK2/NME1	2
GO:0030279	negative regulation of ossification	2/80	70/15278	0.0520158	0.300572	0.275048	CITED1/IGFBP5	2
GO:1903201	regulation of oxidative stress-induced cell death	2/80	70/15278	0.0520158	0.300572	0.275048	P4HB/ATF4	2
GO:0007411	axon guidance	4/80	269/15278	0.0526097	0.300572	0.275048	LRTM2/RET/PLXNA4/EFNA3	4
GO:0097485	neuron projection guidance	4/80	270/15278	0.0531961	0.300572	0.275048	LRTM2/RET/PLXNA4/EFNA3	4
GO:0014015	positive regulation of gliogenesis	2/80	71/15278	0.0533462	0.300572	0.275048	ETV5/RNF112	2
GO:0030104	water homeostasis	2/80	71/15278	0.0533462	0.300572	0.275048	ADCY8/GBA	2
GO:0050805	negative regulation of synaptic transmission	2/80	71/15278	0.0533462	0.300572	0.275048	ADCY8/SYT4	2
GO:0015698	inorganic anion transport	3/80	163/15278	0.0539985	0.300572	0.275048	SLC20A1/ATF4/SFRP4	3
GO:0003151	outflow tract morphogenesis	2/80	72/15278	0.0546886	0.300572	0.275048	HEYL/CITED2	2
GO:0003281	ventricular septum development	2/80	72/15278	0.0546886	0.300572	0.275048	HEYL/CITED2	2
GO:0099173	postsynapse organization	3/80	164/15278	0.0548041	0.300572	0.275048	ETV5/LRRC4B/LRP8	3
GO:0090287	regulation of cellular response to growth factor stimulus	4/80	273/15278	0.0549765	0.300572	0.275048	CITED1/CD63/CITED2/SFRP4	4
GO:0050673	epithelial cell proliferation	5/80	394/15278	0.0556139	0.300572	0.275048	PTPRN/IGFBP5/SCG2/CDH13/NME1	5
GO:0003205	cardiac chamber development	3/80	165/15278	0.0556156	0.300572	0.275048	RYR2/HEYL/CITED2	3
GO:0050806	positive regulation of synaptic transmission	3/80	165/15278	0.0556156	0.300572	0.275048	SYT9/ADCY8/UNC13A	3
GO:1990138	neuron projection extension	3/80	165/15278	0.0556156	0.300572	0.275048	PLXNA4/UNC13A/SYT4	3
GO:0008306	associative learning	2/80	73/15278	0.056043	0.300572	0.275048	FOS/OPRL1	2
GO:0009199	ribonucleoside triphosphate metabolic process	2/80	73/15278	0.056043	0.300572	0.275048	UCK2/NME1	2
GO:0060411	cardiac septum morphogenesis	2/80	73/15278	0.056043	0.300572	0.275048	HEYL/CITED2	2
GO:0072527	pyrimidine-containing compound metabolic process	2/80	73/15278	0.056043	0.300572	0.275048	UCK2/NME1	2
GO:0009629	response to gravity	1/80	11/15278	0.0561325	0.300572	0.275048	FOS	1
GO:0014745	negative regulation of muscle adaptation	1/80	11/15278	0.0561325	0.300572	0.275048	IGFBP5	1
GO:0018401	peptidyl-proline hydroxylation to 4-hydroxy-L-proline	1/80	11/15278	0.0561325	0.300572	0.275048	P4HB	1
GO:0031340	positive regulation of vesicle fusion	1/80	11/15278	0.0561325	0.300572	0.275048	SYT9	1
GO:0032253	dense core granule localization	1/80	11/15278	0.0561325	0.300572	0.275048	SYT4	1
GO:0033139	regulation of peptidyl-serine phosphorylation of STAT protein	1/80	11/15278	0.0561325	0.300572	0.275048	RET	1
GO:0043476	pigment accumulation	1/80	11/15278	0.0561325	0.300572	0.275048	CD63	1
GO:0043482	cellular pigment accumulation	1/80	11/15278	0.0561325	0.300572	0.275048	CD63	1
GO:0043589	skin morphogenesis	1/80	11/15278	0.0561325	0.300572	0.275048	GBA	1
GO:0043619	regulation of transcription from RNA polymerase II promoter in response to oxidative stress	1/80	11/15278	0.0561325	0.300572	0.275048	ATF4	1
GO:0045760	positive regulation of action potential	1/80	11/15278	0.0561325	0.300572	0.275048	GBA	1
GO:0046929	negative regulation of neurotransmitter secretion	1/80	11/15278	0.0561325	0.300572	0.275048	SYT4	1
GO:0060453	regulation of gastric acid secretion	1/80	11/15278	0.0561325	0.300572	0.275048	OPRL1	1
GO:0061314	Notch signaling involved in heart development	1/80	11/15278	0.0561325	0.300572	0.275048	HEYL	1
GO:0071415	cellular response to purine-containing compound	1/80	11/15278	0.0561325	0.300572	0.275048	RYR2	1
GO:0086067	AV node cell to bundle of His cell communication	1/80	11/15278	0.0561325	0.300572	0.275048	RYR2	1
GO:0090193	positive regulation of glomerulus development	1/80	11/15278	0.0561325	0.300572	0.275048	RET	1
GO:0097201	negative regulation of transcription from RNA polymerase II promoter in response to stress	1/80	11/15278	0.0561325	0.300572	0.275048	CITED2	1
GO:0098917	retrograde trans-synaptic signaling	1/80	11/15278	0.0561325	0.300572	0.275048	SYT4	1
GO:0099519	dense core granule cytoskeletal transport	1/80	11/15278	0.0561325	0.300572	0.275048	SYT4	1
GO:0106070	regulation of adenylate cyclase-activating G protein-coupled receptor signaling pathway	1/80	11/15278	0.0561325	0.300572	0.275048	OPRL1	1
GO:1901070	guanosine-containing compound biosynthetic process	1/80	11/15278	0.0561325	0.300572	0.275048	NME1	1
GO:1901950	dense core granule transport	1/80	11/15278	0.0561325	0.300572	0.275048	SYT4	1
GO:1902260	negative regulation of delayed rectifier potassium channel activity	1/80	11/15278	0.0561325	0.300572	0.275048	KCNAB1	1
GO:1902285	semaphorin-plexin signaling pathway involved in neuron projection guidance	1/80	11/15278	0.0561325	0.300572	0.275048	PLXNA4	1
GO:1904321	response to forskolin	1/80	11/15278	0.0561325	0.300572	0.275048	ADCY8	1
GO:1904322	cellular response to forskolin	1/80	11/15278	0.0561325	0.300572	0.275048	ADCY8	1
GO:1904350	regulation of protein catabolic process in the vacuole	1/80	11/15278	0.0561325	0.300572	0.275048	GBA	1
GO:1990440	positive regulation of transcription from RNA polymerase II promoter in response to endoplasmic reticulum stress	1/80	11/15278	0.0561325	0.300572	0.275048	ATF4	1
GO:2000302	positive regulation of synaptic vesicle exocytosis	1/80	11/15278	0.0561325	0.300572	0.275048	SYT9	1
GO:0032410	negative regulation of transporter activity	2/80	74/15278	0.0574091	0.300572	0.275048	KCNAB1/OPRL1	2
GO:0035050	embryonic heart tube development	2/80	74/15278	0.0574091	0.300572	0.275048	RYR2/CITED2	2
GO:2000243	positive regulation of reproductive process	2/80	75/15278	0.0587868	0.300572	0.275048	ACVR1B/CITED2	2
GO:0007269	neurotransmitter secretion	3/80	169/15278	0.0589188	0.300572	0.275048	SYT9/UNC13A/SYT4	3
GO:0099643	signal release from synapse	3/80	169/15278	0.0589188	0.300572	0.275048	SYT9/UNC13A/SYT4	3
GO:0007494	midgut development	1/80	12/15278	0.0610784	0.300572	0.275048	RET	1
GO:0015803	branched-chain amino acid transport	1/80	12/15278	0.0610784	0.300572	0.275048	SLC3A2	1
GO:0016188	synaptic vesicle maturation	1/80	12/15278	0.0610784	0.300572	0.275048	UNC13A	1
GO:0032096	negative regulation of response to food	1/80	12/15278	0.0610784	0.300572	0.275048	NUCB2	1
GO:0032099	negative regulation of appetite	1/80	12/15278	0.0610784	0.300572	0.275048	NUCB2	1
GO:0043568	positive regulation of insulin-like growth factor receptor signaling pathway	1/80	12/15278	0.0610784	0.300572	0.275048	IGFBP5	1
GO:0048245	eosinophil chemotaxis	1/80	12/15278	0.0610784	0.300572	0.275048	SCG2	1
GO:0048484	enteric nervous system development	1/80	12/15278	0.0610784	0.300572	0.275048	RET	1
GO:0051639	actin filament network formation	1/80	12/15278	0.0610784	0.300572	0.275048	FHOD3	1
GO:0055062	phosphate ion homeostasis	1/80	12/15278	0.0610784	0.300572	0.275048	SFRP4	1
GO:0061450	trophoblast cell migration	1/80	12/15278	0.0610784	0.300572	0.275048	ACVR1B	1
GO:0061469	regulation of type B pancreatic cell proliferation	1/80	12/15278	0.0610784	0.300572	0.275048	PTPRN	1
GO:0071107	response to parathyroid hormone	1/80	12/15278	0.0610784	0.300572	0.275048	CITED1	1
GO:0071287	cellular response to manganese ion	1/80	12/15278	0.0610784	0.300572	0.275048	ATF4	1
GO:0071340	skeletal muscle acetylcholine-gated channel clustering	1/80	12/15278	0.0610784	0.300572	0.275048	ETV5	1
GO:0072505	divalent inorganic anion homeostasis	1/80	12/15278	0.0610784	0.300572	0.275048	SFRP4	1
GO:0072506	trivalent inorganic anion homeostasis	1/80	12/15278	0.0610784	0.300572	0.275048	SFRP4	1
GO:0099151	regulation of postsynaptic density assembly	1/80	12/15278	0.0610784	0.300572	0.275048	LRRC4B	1
GO:1901163	regulation of trophoblast cell migration	1/80	12/15278	0.0610784	0.300572	0.275048	ACVR1B	1
GO:1990403	embryonic brain development	1/80	12/15278	0.0610784	0.300572	0.275048	RNF112	1
GO:0009260	ribonucleotide biosynthetic process	3/80	172/15278	0.061456	0.300572	0.275048	UCK2/ADCY8/NME1	3
GO:0014031	mesenchymal cell development	2/80	77/15278	0.0615765	0.300572	0.275048	RET/HEYL	2
GO:0021766	hippocampus development	2/80	77/15278	0.0615765	0.300572	0.275048	NME1/LRP8	2
GO:2000300	regulation of synaptic vesicle exocytosis	2/80	77/15278	0.0615765	0.300572	0.275048	SYT9/SYT4	2
GO:0002088	lens development in camera-type eye	2/80	78/15278	0.0629881	0.300572	0.275048	CRYAB/ATF4	2
GO:1904035	regulation of epithelial cell apoptotic process	2/80	78/15278	0.0629881	0.300572	0.275048	SCG2/SFRP4	2
GO:1904063	negative regulation of cation transmembrane transport	2/80	78/15278	0.0629881	0.300572	0.275048	KCNAB1/OPRL1	2
GO:0050808	synapse organization	5/80	409/15278	0.0632352	0.300572	0.275048	ETV5/LRTM2/LRRC4B/LRP8/UNC13A	5
GO:0007568	aging	4/80	287/15278	0.0637093	0.300572	0.275048	FOS/CRYAB/IGFBP5/RPN2	4
GO:0007179	transforming growth factor beta receptor signaling pathway	3/80	176/15278	0.0649177	0.300572	0.275048	CITED1/FOS/CITED2	3
GO:0006890	retrograde vesicle-mediated transport, Golgi to endoplasmic reticulum	2/80	80/15278	0.0658442	0.300572	0.275048	TMED3/KDELR2	2
GO:0015844	monoamine transport	2/80	80/15278	0.0658442	0.300572	0.275048	SYT9/SYT4	2
GO:0050709	negative regulation of protein secretion	2/80	80/15278	0.0658442	0.300572	0.275048	ERP29/SYT4	2
GO:1901379	regulation of potassium ion transmembrane transport	2/80	80/15278	0.0658442	0.300572	0.275048	CD63/KCNAB1	2
GO:0003337	mesenchymal to epithelial transition involved in metanephros morphogenesis	1/80	13/15278	0.0659987	0.300572	0.275048	CITED1	1
GO:0005513	detection of calcium ion	1/80	13/15278	0.0659987	0.300572	0.275048	RYR2	1
GO:0006596	polyamine biosynthetic process	1/80	13/15278	0.0659987	0.300572	0.275048	SAT1	1
GO:0014733	regulation of skeletal muscle adaptation	1/80	13/15278	0.0659987	0.300572	0.275048	IGFBP5	1
GO:0015801	aromatic amino acid transport	1/80	13/15278	0.0659987	0.300572	0.275048	SLC3A2	1
GO:0033604	negative regulation of catecholamine secretion	1/80	13/15278	0.0659987	0.300572	0.275048	SYT4	1
GO:0035810	positive regulation of urine volume	1/80	13/15278	0.0659987	0.300572	0.275048	OPRL1	1
GO:0045475	locomotor rhythm	1/80	13/15278	0.0659987	0.300572	0.275048	OPRL1	1
GO:0046512	sphingosine biosynthetic process	1/80	13/15278	0.0659987	0.300572	0.275048	GBA	1
GO:0046520	sphingoid biosynthetic process	1/80	13/15278	0.0659987	0.300572	0.275048	GBA	1
GO:0050930	induction of positive chemotaxis	1/80	13/15278	0.0659987	0.300572	0.275048	SCG2	1
GO:0070669	response to interleukin-2	1/80	13/15278	0.0659987	0.300572	0.275048	CITED1	1
GO:0070986	left/right axis specification	1/80	13/15278	0.0659987	0.300572	0.275048	CITED2	1
GO:0071872	cellular response to epinephrine stimulus	1/80	13/15278	0.0659987	0.300572	0.275048	RYR2	1
GO:0099150	regulation of postsynaptic specialization assembly	1/80	13/15278	0.0659987	0.300572	0.275048	LRRC4B	1
GO:0150052	regulation of postsynapse assembly	1/80	13/15278	0.0659987	0.300572	0.275048	LRRC4B	1
GO:1900452	regulation of long-term synaptic depression	1/80	13/15278	0.0659987	0.300572	0.275048	ADCY8	1
GO:1903817	negative regulation of voltage-gated potassium channel activity	1/80	13/15278	0.0659987	0.300572	0.275048	KCNAB1	1
GO:1904925	positive regulation of autophagy of mitochondrion in response to mitochondrial depolarization	1/80	13/15278	0.0659987	0.300572	0.275048	GBA	1
GO:1903532	positive regulation of secretion by cell	4/80	291/15278	0.0663316	0.300572	0.275048	SYT9/ADCY8/UNC13A/SYT4	4
GO:0009314	response to radiation	5/80	415/15278	0.0664422	0.300572	0.275048	AEN/FOS/CRYAB/SIK1/ATF4	5
GO:0043434	response to peptide hormone	5/80	415/15278	0.0664422	0.300572	0.275048	VGF/CITED1/PTPRN/IGFBP5/ADCY8	5
GO:0001942	hair follicle development	2/80	81/15278	0.0672884	0.300572	0.275048	IGFBP5/ACVR1B	2
GO:0007193	adenylate cyclase-inhibiting G protein-coupled receptor signaling pathway	2/80	81/15278	0.0672884	0.300572	0.275048	OPRL1/ADCY8	2
GO:0097306	cellular response to alcohol	2/80	81/15278	0.0672884	0.300572	0.275048	ADCY8/LRP8	2
GO:0140029	exocytic process	2/80	81/15278	0.0672884	0.300572	0.275048	SYT9/UNC13A	2
GO:0046390	ribose phosphate biosynthetic process	3/80	179/15278	0.0675721	0.300572	0.275048	UCK2/ADCY8/NME1	3
GO:0022404	molting cycle process	2/80	83/15278	0.0702082	0.300572	0.275048	IGFBP5/ACVR1B	2
GO:0022405	hair cycle process	2/80	83/15278	0.0702082	0.300572	0.275048	IGFBP5/ACVR1B	2
GO:1900407	regulation of cellular response to oxidative stress	2/80	83/15278	0.0702082	0.300572	0.275048	P4HB/ATF4	2
GO:0003214	cardiac left ventricle morphogenesis	1/80	14/15278	0.0708936	0.300572	0.275048	RYR2	1
GO:0007158	neuron cell-cell adhesion	1/80	14/15278	0.0708936	0.300572	0.275048	RET	1
GO:0009130	pyrimidine nucleoside monophosphate biosynthetic process	1/80	14/15278	0.0708936	0.300572	0.275048	UCK2	1
GO:0009404	toxin metabolic process	1/80	14/15278	0.0708936	0.300572	0.275048	PAM	1
GO:0014048	regulation of glutamate secretion	1/80	14/15278	0.0708936	0.300572	0.275048	SYT4	1
GO:0032105	negative regulation of response to extracellular stimulus	1/80	14/15278	0.0708936	0.300572	0.275048	NUCB2	1
GO:0032108	negative regulation of response to nutrient levels	1/80	14/15278	0.0708936	0.300572	0.275048	NUCB2	1
GO:0035358	regulation of peroxisome proliferator activated receptor signaling pathway	1/80	14/15278	0.0708936	0.300572	0.275048	CITED2	1
GO:0035435	phosphate ion transmembrane transport	1/80	14/15278	0.0708936	0.300572	0.275048	SLC20A1	1
GO:0035437	maintenance of protein localization in endoplasmic reticulum	1/80	14/15278	0.0708936	0.300572	0.275048	KDELR2	1
GO:0043173	nucleotide salvage	1/80	14/15278	0.0708936	0.300572	0.275048	UCK2	1
GO:0043558	regulation of translational initiation in response to stress	1/80	14/15278	0.0708936	0.300572	0.275048	ATF4	1
GO:0044849	estrous cycle	1/80	14/15278	0.0708936	0.300572	0.275048	OPRL1	1
GO:0045019	negative regulation of nitric oxide biosynthetic process	1/80	14/15278	0.0708936	0.300572	0.275048	GLA	1
GO:0045898	regulation of RNA polymerase II transcription preinitiation complex assembly	1/80	14/15278	0.0708936	0.300572	0.275048	THRA	1
GO:0048368	lateral mesoderm development	1/80	14/15278	0.0708936	0.300572	0.275048	CITED2	1
GO:0050746	regulation of lipoprotein metabolic process	1/80	14/15278	0.0708936	0.300572	0.275048	GBA	1
GO:0051284	positive regulation of sequestering of calcium ion	1/80	14/15278	0.0708936	0.300572	0.275048	RYR2	1
GO:0051589	negative regulation of neurotransmitter transport	1/80	14/15278	0.0708936	0.300572	0.275048	SYT4	1
GO:0051775	response to redox state	1/80	14/15278	0.0708936	0.300572	0.275048	RYR2	1
GO:0070307	lens fiber cell development	1/80	14/15278	0.0708936	0.300572	0.275048	ATF4	1
GO:0072216	positive regulation of metanephros development	1/80	14/15278	0.0708936	0.300572	0.275048	RET	1
GO:0090192	regulation of glomerulus development	1/80	14/15278	0.0708936	0.300572	0.275048	RET	1
GO:0099171	presynaptic modulation of chemical synaptic transmission	1/80	14/15278	0.0708936	0.300572	0.275048	SYT9	1
GO:0099550	trans-synaptic signaling, modulating synaptic transmission	1/80	14/15278	0.0708936	0.300572	0.275048	SYT4	1
GO:1901386	negative regulation of voltage-gated calcium channel activity	1/80	14/15278	0.0708936	0.300572	0.275048	OPRL1	1
GO:1904406	negative regulation of nitric oxide metabolic process	1/80	14/15278	0.0708936	0.300572	0.275048	GLA	1
GO:1904923	regulation of autophagy of mitochondrion in response to mitochondrial depolarization	1/80	14/15278	0.0708936	0.300572	0.275048	GBA	1
GO:2001044	regulation of integrin-mediated signaling pathway	1/80	14/15278	0.0708936	0.300572	0.275048	CD63	1
GO:0010769	regulation of cell morphogenesis involved in differentiation	4/80	298/15278	0.0710551	0.300572	0.275048	RET/P4HB/PLXNA4/LRP8	4
GO:0046879	hormone secretion	4/80	298/15278	0.0710551	0.300572	0.275048	VGF/PTPRN/SYT9/ADCY8	4
GO:0009749	response to glucose	3/80	183/15278	0.0711879	0.300572	0.275048	PTPRN/ADCY8/NME1	3
GO:0003333	amino acid transmembrane transport	2/80	84/15278	0.0716836	0.300572	0.275048	SLC38A2/SLC3A2	2
GO:0009798	axis specification	2/80	84/15278	0.0716836	0.300572	0.275048	CITED1/CITED2	2
GO:0098773	skin epidermis development	2/80	84/15278	0.0716836	0.300572	0.275048	IGFBP5/ACVR1B	2
GO:1901019	regulation of calcium ion transmembrane transporter activity	2/80	84/15278	0.0716836	0.300572	0.275048	OPRL1/RYR2	2
GO:0048568	embryonic organ development	5/80	427/15278	0.0731267	0.300572	0.275048	CITED1/RNF112/RYR2/CITED2/ATF4	5
GO:0001656	metanephros development	2/80	85/15278	0.0731691	0.300572	0.275048	CITED1/RET	2
GO:0045921	positive regulation of exocytosis	2/80	85/15278	0.0731691	0.300572	0.275048	SYT9/SYT4	2
GO:1901214	regulation of neuron death	4/80	303/15278	0.0745328	0.300572	0.275048	CITED1/FOS/GBA/ATF4	4
GO:0002792	negative regulation of peptide secretion	2/80	86/15278	0.0746645	0.300572	0.275048	ERP29/SYT4	2
GO:0007589	body fluid secretion	2/80	86/15278	0.0746645	0.300572	0.275048	PAM/NME1	2
GO:0048013	ephrin receptor signaling pathway	2/80	86/15278	0.0746645	0.300572	0.275048	EFNA3/ARHGEF28	2
GO:0072080	nephron tubule development	2/80	86/15278	0.0746645	0.300572	0.275048	CITED1/HEYL	2
GO:0009746	response to hexose	3/80	187/15278	0.0748895	0.300572	0.275048	PTPRN/ADCY8/NME1	3
GO:0006000	fructose metabolic process	1/80	15/15278	0.0757631	0.300572	0.275048	ALDOC	1
GO:0006595	polyamine metabolic process	1/80	15/15278	0.0757631	0.300572	0.275048	SAT1	1
GO:0009129	pyrimidine nucleoside monophosphate metabolic process	1/80	15/15278	0.0757631	0.300572	0.275048	UCK2	1
GO:0031000	response to caffeine	1/80	15/15278	0.0757631	0.300572	0.275048	RYR2	1
GO:0032252	secretory granule localization	1/80	15/15278	0.0757631	0.300572	0.275048	SYT4	1
GO:0032769	negative regulation of monooxygenase activity	1/80	15/15278	0.0757631	0.300572	0.275048	GLA	1
GO:0042501	serine phosphorylation of STAT protein	1/80	15/15278	0.0757631	0.300572	0.275048	RET	1
GO:0043174	nucleoside salvage	1/80	15/15278	0.0757631	0.300572	0.275048	UCK2	1
GO:0046134	pyrimidine nucleoside biosynthetic process	1/80	15/15278	0.0757631	0.300572	0.275048	UCK2	1
GO:0051969	regulation of transmission of nerve impulse	1/80	15/15278	0.0757631	0.300572	0.275048	GBA	1
GO:0060766	negative regulation of androgen receptor signaling pathway	1/80	15/15278	0.0757631	0.300572	0.275048	HEYL	1
GO:1904889	regulation of excitatory synapse assembly	1/80	15/15278	0.0757631	0.300572	0.275048	LRRC4B	1
GO:1905146	lysosomal protein catabolic process	1/80	15/15278	0.0757631	0.300572	0.275048	GBA	1
GO:1905288	vascular associated smooth muscle cell apoptotic process	1/80	15/15278	0.0757631	0.300572	0.275048	ATF4	1
GO:1905459	regulation of vascular associated smooth muscle cell apoptotic process	1/80	15/15278	0.0757631	0.300572	0.275048	ATF4	1
GO:1905874	regulation of postsynaptic density organization	1/80	15/15278	0.0757631	0.300572	0.275048	LRRC4B	1
GO:0051952	regulation of amine transport	2/80	87/15278	0.0761698	0.300572	0.275048	SYT9/SYT4	2
GO:0007626	locomotory behavior	3/80	189/15278	0.0767722	0.300572	0.275048	ETV5/OPRL1/ADCY8	3
GO:0030278	regulation of ossification	3/80	189/15278	0.0767722	0.300572	0.275048	CITED1/IGFBP5/ATF4	3
GO:0009914	hormone transport	4/80	307/15278	0.0773766	0.300572	0.275048	VGF/PTPRN/SYT9/ADCY8	4
GO:0061326	renal tubule development	2/80	88/15278	0.0776848	0.300572	0.275048	CITED1/HEYL	2
GO:0034284	response to monosaccharide	3/80	191/15278	0.0786757	0.300572	0.275048	PTPRN/ADCY8/NME1	3
GO:0099504	synaptic vesicle cycle	3/80	191/15278	0.0786757	0.300572	0.275048	SYT9/UNC13A/SYT4	3
GO:0014897	striated muscle hypertrophy	2/80	89/15278	0.0792093	0.300572	0.275048	IGFBP5/RYR2	2
GO:0060562	epithelial tube morphogenesis	4/80	311/15278	0.0802748	0.300572	0.275048	CITED1/ETV5/RET/RYR2	4
GO:0006750	glutathione biosynthetic process	1/80	16/15278	0.0806074	0.300572	0.275048	CHAC1	1
GO:0009299	mRNA transcription	1/80	16/15278	0.0806074	0.300572	0.275048	ATF4	1
GO:0019511	peptidyl-proline hydroxylation	1/80	16/15278	0.0806074	0.300572	0.275048	P4HB	1
GO:0021783	preganglionic parasympathetic fiber development	1/80	16/15278	0.0806074	0.300572	0.275048	PLXNA4	1
GO:0034393	positive regulation of smooth muscle cell apoptotic process	1/80	16/15278	0.0806074	0.300572	0.275048	ATF4	1
GO:0048532	anatomical structure arrangement	1/80	16/15278	0.0806074	0.300572	0.275048	PLXNA4	1
GO:0060252	positive regulation of glial cell proliferation	1/80	16/15278	0.0806074	0.300572	0.275048	ETV5	1
GO:0071871	response to epinephrine	1/80	16/15278	0.0806074	0.300572	0.275048	RYR2	1
GO:0072224	metanephric glomerulus development	1/80	16/15278	0.0806074	0.300572	0.275048	RET	1
GO:0072283	metanephric renal vesicle morphogenesis	1/80	16/15278	0.0806074	0.300572	0.275048	CITED1	1
GO:0072677	eosinophil migration	1/80	16/15278	0.0806074	0.300572	0.275048	SCG2	1
GO:0090185	negative regulation of kidney development	1/80	16/15278	0.0806074	0.300572	0.275048	CITED1	1
GO:1900451	positive regulation of glutamate receptor signaling pathway	1/80	16/15278	0.0806074	0.300572	0.275048	UNC13A	1
GO:1905939	regulation of gonad development	1/80	16/15278	0.0806074	0.300572	0.275048	CITED2	1
GO:0034766	negative regulation of ion transmembrane transport	2/80	90/15278	0.0807432	0.300572	0.275048	KCNAB1/OPRL1	2
GO:0014896	muscle hypertrophy	2/80	91/15278	0.0822864	0.300572	0.275048	IGFBP5/RYR2	2
GO:0048661	positive regulation of smooth muscle cell proliferation	2/80	91/15278	0.0822864	0.300572	0.275048	IGFBP5/CDH13	2
GO:0006643	membrane lipid metabolic process	3/80	195/15278	0.0825446	0.300572	0.275048	CREM/GLA/GBA	3
GO:0036294	cellular response to decreased oxygen levels	3/80	196/15278	0.0835246	0.300572	0.275048	P4HB/CITED2/ATF4	3
GO:0060541	respiratory system development	3/80	196/15278	0.0835246	0.300572	0.275048	IGFBP5/KCNAB1/THRA	3
GO:0008585	female gonad development	2/80	92/15278	0.0838387	0.300572	0.275048	VGF/PTPRN	2
GO:0051668	localization within membrane	2/80	92/15278	0.0838387	0.300572	0.275048	ETV5/CDH13	2
GO:1902882	regulation of response to oxidative stress	2/80	92/15278	0.0838387	0.300572	0.275048	P4HB/ATF4	2
GO:0016050	vesicle organization	4/80	316/15278	0.0839731	0.300572	0.275048	PTPRN/SYT9/UNC13A/SYT4	4
GO:0001657	ureteric bud development	2/80	93/15278	0.0854	0.300572	0.275048	CITED1/RET	2
GO:0006672	ceramide metabolic process	2/80	93/15278	0.0854	0.300572	0.275048	GLA/GBA	2
GO:0006835	dicarboxylic acid transport	2/80	93/15278	0.0854	0.300572	0.275048	SLC38A2/SYT4	2
GO:0007218	neuropeptide signaling pathway	2/80	93/15278	0.0854	0.300572	0.275048	PDYN/OPRL1	2
GO:0043473	pigmentation	2/80	93/15278	0.0854	0.300572	0.275048	CITED1/CD63	2
GO:1901216	positive regulation of neuron death	2/80	93/15278	0.0854	0.300572	0.275048	FOS/ATF4	2
GO:0003184	pulmonary valve morphogenesis	1/80	17/15278	0.0854267	0.300572	0.275048	HEYL	1
GO:0003198	epithelial to mesenchymal transition involved in endocardial cushion formation	1/80	17/15278	0.0854267	0.300572	0.275048	HEYL	1
GO:0006491	N-glycan processing	1/80	17/15278	0.0854267	0.300572	0.275048	PRKCSH	1
GO:0033194	response to hydroperoxide	1/80	17/15278	0.0854267	0.300572	0.275048	RNF112	1
GO:0034199	activation of protein kinase A activity	1/80	17/15278	0.0854267	0.300572	0.275048	ADCY8	1
GO:0045721	negative regulation of gluconeogenesis	1/80	17/15278	0.0854267	0.300572	0.275048	SIK1	1
GO:0048486	parasympathetic nervous system development	1/80	17/15278	0.0854267	0.300572	0.275048	PLXNA4	1
GO:0051412	response to corticosterone	1/80	17/15278	0.0854267	0.300572	0.275048	FOS	1
GO:0072189	ureter development	1/80	17/15278	0.0854267	0.300572	0.275048	RET	1
GO:0097067	cellular response to thyroid hormone stimulus	1/80	17/15278	0.0854267	0.300572	0.275048	LMO2	1
GO:0097107	postsynaptic density assembly	1/80	17/15278	0.0854267	0.300572	0.275048	LRRC4B	1
GO:0098911	regulation of ventricular cardiac muscle cell action potential	1/80	17/15278	0.0854267	0.300572	0.275048	RYR2	1
GO:1905331	negative regulation of morphogenesis of an epithelium	1/80	17/15278	0.0854267	0.300572	0.275048	CITED1	1
GO:1990000	amyloid fibril formation	1/80	17/15278	0.0854267	0.300572	0.275048	CRYAB	1
GO:2000696	regulation of epithelial cell differentiation involved in kidney development	1/80	17/15278	0.0854267	0.300572	0.275048	CITED1	1
GO:0008406	gonad development	3/80	199/15278	0.0864947	0.300572	0.275048	VGF/PTPRN/CITED2	3
GO:0071805	potassium ion transmembrane transport	3/80	199/15278	0.0864947	0.300572	0.275048	CD63/KCNQ2/KCNAB1	3
GO:0009116	nucleoside metabolic process	2/80	94/15278	0.0869702	0.300572	0.275048	UCK2/NME1	2
GO:0045639	positive regulation of myeloid cell differentiation	2/80	94/15278	0.0869702	0.300572	0.275048	FOS/ACVR1B	2
GO:0072163	mesonephric epithelium development	2/80	94/15278	0.0869702	0.300572	0.275048	CITED1/RET	2
GO:0072164	mesonephric tubule development	2/80	94/15278	0.0869702	0.300572	0.275048	CITED1/RET	2
GO:1904062	regulation of cation transmembrane transport	4/80	320/15278	0.0869918	0.300572	0.275048	CD63/KCNAB1/OPRL1/RYR2	4
GO:0009612	response to mechanical stimulus	3/80	200/15278	0.0874948	0.300572	0.275048	FOS/SLC38A2/RYR2	3
GO:0016485	protein processing	3/80	200/15278	0.0874948	0.300572	0.275048	PCSK1/PCSK2/CHAC1	3
GO:1901215	negative regulation of neuron death	3/80	200/15278	0.0874948	0.300572	0.275048	CITED1/GBA/ATF4	3
GO:0034765	regulation of ion transmembrane transport	5/80	451/15278	0.087566	0.300572	0.275048	CD63/KCNQ2/KCNAB1/OPRL1/RYR2	5
GO:0007631	feeding behavior	2/80	95/15278	0.0885491	0.300572	0.275048	FOS/OPRL1	2
GO:0015837	amine transport	2/80	95/15278	0.0885491	0.300572	0.275048	SYT9/SYT4	2
GO:0045807	positive regulation of endocytosis	2/80	95/15278	0.0885491	0.300572	0.275048	CD63/SFRP4	2
GO:0048259	regulation of receptor-mediated endocytosis	2/80	95/15278	0.0885491	0.300572	0.275048	CD63/SFRP4	2
GO:0006906	vesicle fusion	2/80	96/15278	0.0901366	0.300572	0.275048	SYT9/SYT4	2
GO:0035335	peptidyl-tyrosine dephosphorylation	2/80	96/15278	0.0901366	0.300572	0.275048	PTPRN/PTPRT	2
GO:0071868	cellular response to monoamine stimulus	2/80	96/15278	0.0901366	0.300572	0.275048	RYR2/ATF4	2
GO:0071870	cellular response to catecholamine stimulus	2/80	96/15278	0.0901366	0.300572	0.275048	RYR2/ATF4	2
GO:0001696	gastric acid secretion	1/80	18/15278	0.090221	0.300572	0.275048	OPRL1	1
GO:0006670	sphingosine metabolic process	1/80	18/15278	0.090221	0.300572	0.275048	GBA	1
GO:0006833	water transport	1/80	18/15278	0.090221	0.300572	0.275048	SLC14A1	1
GO:0007221	positive regulation of transcription of Notch receptor target	1/80	18/15278	0.090221	0.300572	0.275048	HEYL	1
GO:0008356	asymmetric cell division	1/80	18/15278	0.090221	0.300572	0.275048	ETV5	1
GO:0019184	nonribosomal peptide biosynthetic process	1/80	18/15278	0.090221	0.300572	0.275048	CHAC1	1
GO:0032095	regulation of response to food	1/80	18/15278	0.090221	0.300572	0.275048	NUCB2	1
GO:0033630	positive regulation of cell adhesion mediated by integrin	1/80	18/15278	0.090221	0.300572	0.275048	RET	1
GO:0045947	negative regulation of translational initiation	1/80	18/15278	0.090221	0.300572	0.275048	ATF4	1
GO:0048485	sympathetic nervous system development	1/80	18/15278	0.090221	0.300572	0.275048	PLXNA4	1
GO:0055003	cardiac myofibril assembly	1/80	18/15278	0.090221	0.300572	0.275048	FHOD3	1
GO:0071404	cellular response to low-density lipoprotein particle stimulus	1/80	18/15278	0.090221	0.300572	0.275048	CDH13	1
GO:0072077	renal vesicle morphogenesis	1/80	18/15278	0.090221	0.300572	0.275048	CITED1	1
GO:0086014	atrial cardiac muscle cell action potential	1/80	18/15278	0.090221	0.300572	0.275048	RYR2	1
GO:0086026	atrial cardiac muscle cell to AV node cell signaling	1/80	18/15278	0.090221	0.300572	0.275048	RYR2	1
GO:0086066	atrial cardiac muscle cell to AV node cell communication	1/80	18/15278	0.090221	0.300572	0.275048	RYR2	1
GO:1902259	regulation of delayed rectifier potassium channel activity	1/80	18/15278	0.090221	0.300572	0.275048	KCNAB1	1
GO:1904754	positive regulation of vascular associated smooth muscle cell migration	1/80	18/15278	0.090221	0.300572	0.275048	IGFBP5	1
GO:0048545	response to steroid hormone	4/80	325/15278	0.090839	0.302081	0.276429	PAM/FOS/HEYL/GBA	4
GO:0050920	regulation of chemotaxis	3/80	204/15278	0.091544	0.303397	0.277633	SCG2/CDH13/PLXNA4	3
GO:0009141	nucleoside triphosphate metabolic process	2/80	97/15278	0.0917325	0.303397	0.277633	UCK2/NME1	2
GO:0043279	response to alkaloid	2/80	97/15278	0.0917325	0.303397	0.277633	ADCY8/RYR2	2
GO:0016051	carbohydrate biosynthetic process	3/80	205/15278	0.0925685	0.304954	0.279058	SIK1/ALDOC/ATF4	3
GO:0001823	mesonephros development	2/80	98/15278	0.0933368	0.304954	0.279058	CITED1/RET	2
GO:0034404	nucleobase-containing small molecule biosynthetic process	2/80	98/15278	0.0933368	0.304954	0.279058	UCK2/NME1	2
GO:0042303	molting cycle	2/80	98/15278	0.0933368	0.304954	0.279058	IGFBP5/ACVR1B	2
GO:0042633	hair cycle	2/80	98/15278	0.0933368	0.304954	0.279058	IGFBP5/ACVR1B	2
GO:1901890	positive regulation of cell junction assembly	2/80	98/15278	0.0933368	0.304954	0.279058	LRTM2/LRRC4B	2
GO:0048738	cardiac muscle tissue development	3/80	207/15278	0.0946318	0.304954	0.279058	SIK1/FHOD3/RYR2	3
GO:0001502	cartilage condensation	1/80	19/15278	0.0949905	0.304954	0.279058	THRA	1
GO:0007039	protein catabolic process in the vacuole	1/80	19/15278	0.0949905	0.304954	0.279058	GBA	1
GO:0007194	negative regulation of adenylate cyclase activity	1/80	19/15278	0.0949905	0.304954	0.279058	GABBR2	1
GO:0010042	response to manganese ion	1/80	19/15278	0.0949905	0.304954	0.279058	ATF4	1
GO:0034312	diol biosynthetic process	1/80	19/15278	0.0949905	0.304954	0.279058	GBA	1
GO:0043555	regulation of translation in response to stress	1/80	19/15278	0.0949905	0.304954	0.279058	ATF4	1
GO:0071397	cellular response to cholesterol	1/80	19/15278	0.0949905	0.304954	0.279058	LRP8	1
GO:0072087	renal vesicle development	1/80	19/15278	0.0949905	0.304954	0.279058	CITED1	1
GO:0097191	extrinsic apoptotic signaling pathway	3/80	208/15278	0.0956706	0.304954	0.279058	RET/SCG2/ACVR1B	3
GO:0001938	positive regulation of endothelial cell proliferation	2/80	100/15278	0.09657	0.304954	0.279058	SCG2/CDH13	2
GO:0071867	response to monoamine	2/80	100/15278	0.09657	0.304954	0.279058	RYR2/ATF4	2
GO:0071869	response to catecholamine	2/80	100/15278	0.09657	0.304954	0.279058	RYR2/ATF4	2
GO:0021761	limbic system development	2/80	101/15278	0.0981985	0.304954	0.279058	NME1/LRP8	2
GO:0051963	regulation of synapse assembly	2/80	101/15278	0.0981985	0.304954	0.279058	LRTM2/LRRC4B	2
GO:0072009	nephron epithelium development	2/80	101/15278	0.0981985	0.304954	0.279058	CITED1/HEYL	2
GO:0001649	osteoblast differentiation	3/80	211/15278	0.0988153	0.304954	0.279058	CITED1/IGFBP5/ATF4	3
GO:0002089	lens morphogenesis in camera-type eye	1/80	20/15278	0.0997353	0.304954	0.279058	ATF4	1
GO:0007530	sex determination	1/80	20/15278	0.0997353	0.304954	0.279058	CITED2	1
GO:0007617	mating behavior	1/80	20/15278	0.0997353	0.304954	0.279058	THRA	1
GO:0010866	regulation of triglyceride biosynthetic process	1/80	20/15278	0.0997353	0.304954	0.279058	SIK1	1
GO:0010881	regulation of cardiac muscle contraction by regulation of the release of sequestered calcium ion	1/80	20/15278	0.0997353	0.304954	0.279058	RYR2	1
GO:0016082	synaptic vesicle priming	1/80	20/15278	0.0997353	0.304954	0.279058	UNC13A	1
GO:0016540	protein autoprocessing	1/80	20/15278	0.0997353	0.304954	0.279058	PCSK2	1
GO:0030878	thyroid gland development	1/80	20/15278	0.0997353	0.304954	0.279058	THRA	1
GO:0035809	regulation of urine volume	1/80	20/15278	0.0997353	0.304954	0.279058	OPRL1	1
GO:0042402	cellular biogenic amine catabolic process	1/80	20/15278	0.0997353	0.304954	0.279058	SAT1	1
GO:0042438	melanin biosynthetic process	1/80	20/15278	0.0997353	0.304954	0.279058	CITED1	1
GO:0042451	purine nucleoside biosynthetic process	1/80	20/15278	0.0997353	0.304954	0.279058	NME1	1
GO:0042455	ribonucleoside biosynthetic process	1/80	20/15278	0.0997353	0.304954	0.279058	NME1	1
GO:0046129	purine ribonucleoside biosynthetic process	1/80	20/15278	0.0997353	0.304954	0.279058	NME1	1
GO:0046519	sphingoid metabolic process	1/80	20/15278	0.0997353	0.304954	0.279058	GBA	1
GO:0051957	positive regulation of amino acid transport	1/80	20/15278	0.0997353	0.304954	0.279058	SYT4	1
GO:0060231	mesenchymal to epithelial transition	1/80	20/15278	0.0997353	0.304954	0.279058	CITED1	1
GO:0061003	positive regulation of dendritic spine morphogenesis	1/80	20/15278	0.0997353	0.304954	0.279058	LRP8	1
GO:0098698	postsynaptic specialization assembly	1/80	20/15278	0.0997353	0.304954	0.279058	LRRC4B	1
GO:0098780	response to mitochondrial depolarisation	1/80	20/15278	0.0997353	0.304954	0.279058	GBA	1
GO:1903599	positive regulation of autophagy of mitochondrion	1/80	20/15278	0.0997353	0.304954	0.279058	GBA	1
GO:0090174	organelle membrane fusion	2/80	102/15278	0.0998349	0.304954	0.279058	SYT9/SYT4	2
GO:0099003	vesicle-mediated transport in synapse	3/80	212/15278	0.0998728	0.304954	0.279058	SYT9/UNC13A/SYT4	3
GO:0071453	cellular response to oxygen levels	3/80	213/15278	0.100935	0.30666	0.280619	P4HB/CITED2/ATF4	3
GO:0097305	response to alcohol	3/80	213/15278	0.100935	0.30666	0.280619	FOS/ADCY8/LRP8	3
GO:0043618	regulation of transcription from RNA polymerase II promoter in response to stress	2/80	103/15278	0.101479	0.30666	0.280619	CITED2/ATF4	2
GO:0099175	regulation of postsynapse organization	2/80	103/15278	0.101479	0.30666	0.280619	LRRC4B/LRP8	2
GO:0050678	regulation of epithelial cell proliferation	4/80	339/15278	0.10204	0.30666	0.280619	PTPRN/SCG2/CDH13/NME1	4
GO:0021987	cerebral cortex development	2/80	104/15278	0.103131	0.30666	0.280619	SLC38A2/LRP8	2
GO:0070997	neuron death	4/80	341/15278	0.10369	0.30666	0.280619	CITED1/FOS/GBA/ATF4	4
GO:0009743	response to carbohydrate	3/80	216/15278	0.104149	0.30666	0.280619	PTPRN/ADCY8/NME1	3
GO:0003177	pulmonary valve development	1/80	21/15278	0.104455	0.30666	0.280619	HEYL	1
GO:0006582	melanin metabolic process	1/80	21/15278	0.104455	0.30666	0.280619	CITED1	1
GO:0009190	cyclic nucleotide biosynthetic process	1/80	21/15278	0.104455	0.30666	0.280619	ADCY8	1
GO:0031280	negative regulation of cyclase activity	1/80	21/15278	0.104455	0.30666	0.280619	GABBR2	1
GO:0035357	peroxisome proliferator activated receptor signaling pathway	1/80	21/15278	0.104455	0.30666	0.280619	CITED2	1
GO:0035584	calcium-mediated signaling using intracellular calcium source	1/80	21/15278	0.104455	0.30666	0.280619	RYR2	1
GO:0036499	PERK-mediated unfolded protein response	1/80	21/15278	0.104455	0.30666	0.280619	ATF4	1
GO:0045943	positive regulation of transcription by RNA polymerase I	1/80	21/15278	0.104455	0.30666	0.280619	ATF4	1
GO:0052652	cyclic purine nucleotide metabolic process	1/80	21/15278	0.104455	0.30666	0.280619	ADCY8	1
GO:0060487	lung epithelial cell differentiation	1/80	21/15278	0.104455	0.30666	0.280619	THRA	1
GO:0060972	left/right pattern formation	1/80	21/15278	0.104455	0.30666	0.280619	CITED2	1
GO:0140467	integrated stress response signaling	1/80	21/15278	0.104455	0.30666	0.280619	ATF4	1
GO:1901017	negative regulation of potassium ion transmembrane transporter activity	1/80	21/15278	0.104455	0.30666	0.280619	KCNAB1	1
GO:1901522	positive regulation of transcription from RNA polymerase II promoter involved in cellular response to chemical stimulus	1/80	21/15278	0.104455	0.30666	0.280619	ATF4	1
GO:1903204	negative regulation of oxidative stress-induced neuron death	1/80	21/15278	0.104455	0.30666	0.280619	ATF4	1
GO:1903306	negative regulation of regulated secretory pathway	1/80	21/15278	0.104455	0.30666	0.280619	SYT4	1
GO:0031623	receptor internalization	2/80	107/15278	0.10813	0.310962	0.284556	CD63/SFRP4	2
GO:0048588	developmental cell growth	3/80	220/15278	0.108497	0.310962	0.284556	PLXNA4/UNC13A/SYT4	3
GO:0009309	amine biosynthetic process	1/80	22/15278	0.109151	0.310962	0.284556	SAT1	1
GO:0009310	amine catabolic process	1/80	22/15278	0.109151	0.310962	0.284556	SAT1	1
GO:0030325	adrenal gland development	1/80	22/15278	0.109151	0.310962	0.284556	CITED2	1
GO:0031629	synaptic vesicle fusion to presynaptic active zone membrane	1/80	22/15278	0.109151	0.310962	0.284556	SYT9	1
GO:0032098	regulation of appetite	1/80	22/15278	0.109151	0.310962	0.284556	NUCB2	1
GO:0035162	embryonic hemopoiesis	1/80	22/15278	0.109151	0.310962	0.284556	ATF4	1
GO:0042401	cellular biogenic amine biosynthetic process	1/80	22/15278	0.109151	0.310962	0.284556	SAT1	1
GO:0044550	secondary metabolite biosynthetic process	1/80	22/15278	0.109151	0.310962	0.284556	CITED1	1
GO:0046039	GTP metabolic process	1/80	22/15278	0.109151	0.310962	0.284556	NME1	1
GO:0046058	cAMP metabolic process	1/80	22/15278	0.109151	0.310962	0.284556	ADCY8	1
GO:0048799	animal organ maturation	1/80	22/15278	0.109151	0.310962	0.284556	RET	1
GO:0060479	lung cell differentiation	1/80	22/15278	0.109151	0.310962	0.284556	THRA	1
GO:0086064	cell communication by electrical coupling involved in cardiac conduction	1/80	22/15278	0.109151	0.310962	0.284556	RYR2	1
GO:0098743	cell aggregation	1/80	22/15278	0.109151	0.310962	0.284556	THRA	1
GO:1900746	regulation of vascular endothelial growth factor signaling pathway	1/80	22/15278	0.109151	0.310962	0.284556	CD63	1
GO:1903429	regulation of cell maturation	1/80	22/15278	0.109151	0.310962	0.284556	RET	1
GO:2000209	regulation of anoikis	1/80	22/15278	0.109151	0.310962	0.284556	SIK1	1
GO:0043620	regulation of DNA-templated transcription in response to stress	2/80	108/15278	0.109811	0.312355	0.28583	CITED2/ATF4	2
GO:0006836	neurotransmitter transport	3/80	222/15278	0.110698	0.313294	0.286689	SYT9/UNC13A/SYT4	3
GO:0003279	cardiac septum development	2/80	109/15278	0.111499	0.313294	0.286689	HEYL/CITED2	2
GO:0071560	cellular response to transforming growth factor beta stimulus	3/80	223/15278	0.111804	0.313294	0.286689	CITED1/FOS/CITED2	3
GO:0098693	regulation of synaptic vesicle cycle	2/80	110/15278	0.113193	0.313294	0.286689	SYT9/SYT4	2
GO:0007274	neuromuscular synaptic transmission	1/80	23/15278	0.113823	0.313294	0.286689	ETV5	1
GO:0014850	response to muscle activity	1/80	23/15278	0.113823	0.313294	0.286689	RYR2	1
GO:0016578	histone deubiquitination	1/80	23/15278	0.113823	0.313294	0.286689	USP22	1
GO:0032925	regulation of activin receptor signaling pathway	1/80	23/15278	0.113823	0.313294	0.286689	ACVR1B	1
GO:0043501	skeletal muscle adaptation	1/80	23/15278	0.113823	0.313294	0.286689	IGFBP5	1
GO:0043951	negative regulation of cAMP-mediated signaling	1/80	23/15278	0.113823	0.313294	0.286689	OPRL1	1
GO:0045606	positive regulation of epidermal cell differentiation	1/80	23/15278	0.113823	0.313294	0.286689	SFRP4	1
GO:0051350	negative regulation of lyase activity	1/80	23/15278	0.113823	0.313294	0.286689	GABBR2	1
GO:0060444	branching involved in mammary gland duct morphogenesis	1/80	23/15278	0.113823	0.313294	0.286689	ETV5	1
GO:0072337	modified amino acid transport	1/80	23/15278	0.113823	0.313294	0.286689	SLC38A2	1
GO:0099500	vesicle fusion to plasma membrane	1/80	23/15278	0.113823	0.313294	0.286689	SYT9	1
GO:1900273	positive regulation of long-term synaptic potentiation	1/80	23/15278	0.113823	0.313294	0.286689	ADCY8	1
GO:1902993	positive regulation of amyloid precursor protein catabolic process	1/80	23/15278	0.113823	0.313294	0.286689	EFNA3	1
GO:2000050	regulation of non-canonical Wnt signaling pathway	1/80	23/15278	0.113823	0.313294	0.286689	SFRP4	1
GO:0045637	regulation of myeloid cell differentiation	3/80	225/15278	0.114031	0.313294	0.286689	FOS/ACVR1B/NME1	3
GO:0017015	regulation of transforming growth factor beta receptor signaling pathway	2/80	111/15278	0.114895	0.313294	0.286689	CITED1/CITED2	2
GO:0055007	cardiac muscle cell differentiation	2/80	111/15278	0.114895	0.313294	0.286689	SIK1/FHOD3	2
GO:0001505	regulation of neurotransmitter levels	3/80	226/15278	0.11515	0.313294	0.286689	SYT9/UNC13A/SYT4	3
GO:0060560	developmental growth involved in morphogenesis	3/80	227/15278	0.116274	0.313294	0.286689	PLXNA4/UNC13A/SYT4	3
GO:0002761	regulation of myeloid leukocyte differentiation	2/80	112/15278	0.116603	0.313294	0.286689	FOS/NME1	2
GO:0003014	renal system process	2/80	112/15278	0.116603	0.313294	0.286689	OPRL1/ADCY8	2
GO:1901652	response to peptide	5/80	494/15278	0.116884	0.313294	0.286689	VGF/CITED1/PTPRN/IGFBP5/ADCY8	5
GO:0045926	negative regulation of growth	3/80	228/15278	0.117402	0.313294	0.286689	CRYAB/IGFBP5/ACVR1B	3
GO:0034763	negative regulation of transmembrane transport	2/80	113/15278	0.118317	0.313294	0.286689	KCNAB1/OPRL1	2
GO:1903844	regulation of cellular response to transforming growth factor beta stimulus	2/80	113/15278	0.118317	0.313294	0.286689	CITED1/CITED2	2
GO:0002021	response to dietary excess	1/80	24/15278	0.11847	0.313294	0.286689	VGF	1
GO:0002026	regulation of the force of heart contraction	1/80	24/15278	0.11847	0.313294	0.286689	RYR2	1
GO:0003181	atrioventricular valve morphogenesis	1/80	24/15278	0.11847	0.313294	0.286689	HEYL	1
GO:0003272	endocardial cushion formation	1/80	24/15278	0.11847	0.313294	0.286689	HEYL	1
GO:0015949	nucleobase-containing small molecule interconversion	1/80	24/15278	0.11847	0.313294	0.286689	NME1	1
GO:0021952	central nervous system projection neuron axonogenesis	1/80	24/15278	0.11847	0.313294	0.286689	PLXNA4	1
GO:0032104	regulation of response to extracellular stimulus	1/80	24/15278	0.11847	0.313294	0.286689	NUCB2	1
GO:0032107	regulation of response to nutrient levels	1/80	24/15278	0.11847	0.313294	0.286689	NUCB2	1
GO:0034377	plasma lipoprotein particle assembly	1/80	24/15278	0.11847	0.313294	0.286689	P4HB	1
GO:0035902	response to immobilization stress	1/80	24/15278	0.11847	0.313294	0.286689	FOS	1
GO:0036003	positive regulation of transcription from RNA polymerase II promoter in response to stress	1/80	24/15278	0.11847	0.313294	0.286689	ATF4	1
GO:0036315	cellular response to sterol	1/80	24/15278	0.11847	0.313294	0.286689	LRP8	1
GO:0043171	peptide catabolic process	1/80	24/15278	0.11847	0.313294	0.286689	CHAC1	1
GO:0043567	regulation of insulin-like growth factor receptor signaling pathway	1/80	24/15278	0.11847	0.313294	0.286689	IGFBP5	1
GO:0051123	RNA polymerase II preinitiation complex assembly	1/80	24/15278	0.11847	0.313294	0.286689	THRA	1
GO:0060561	apoptotic process involved in morphogenesis	1/80	24/15278	0.11847	0.313294	0.286689	CRYAB	1
GO:0071377	cellular response to glucagon stimulus	1/80	24/15278	0.11847	0.313294	0.286689	ADCY8	1
GO:0072273	metanephric nephron morphogenesis	1/80	24/15278	0.11847	0.313294	0.286689	CITED1	1
GO:1902547	regulation of cellular response to vascular endothelial growth factor stimulus	1/80	24/15278	0.11847	0.313294	0.286689	CD63	1
GO:0071559	response to transforming growth factor beta	3/80	229/15278	0.118534	0.313294	0.286689	CITED1/FOS/CITED2	3
GO:0030900	forebrain development	4/80	360/15278	0.119976	0.316647	0.289758	SLC38A2/NME1/PLXNA4/LRP8	4
GO:0007613	memory	2/80	115/15278	0.121766	0.319344	0.292226	ADCY8/SYT4	2
GO:0010882	regulation of cardiac muscle contraction by calcium ion signaling	1/80	25/15278	0.123093	0.319344	0.292226	RYR2	1
GO:0010955	negative regulation of protein processing	1/80	25/15278	0.123093	0.319344	0.292226	CHAC1	1
GO:0015012	heparan sulfate proteoglycan biosynthetic process	1/80	25/15278	0.123093	0.319344	0.292226	GLCE	1
GO:0034311	diol metabolic process	1/80	25/15278	0.123093	0.319344	0.292226	GBA	1
GO:0042044	fluid transport	1/80	25/15278	0.123093	0.319344	0.292226	SLC14A1	1
GO:0042219	cellular modified amino acid catabolic process	1/80	25/15278	0.123093	0.319344	0.292226	CHAC1	1
GO:0060765	regulation of androgen receptor signaling pathway	1/80	25/15278	0.123093	0.319344	0.292226	HEYL	1
GO:0072202	cell differentiation involved in metanephros development	1/80	25/15278	0.123093	0.319344	0.292226	CITED1	1
GO:1901380	negative regulation of potassium ion transmembrane transport	1/80	25/15278	0.123093	0.319344	0.292226	KCNAB1	1
GO:1903318	negative regulation of protein maturation	1/80	25/15278	0.123093	0.319344	0.292226	CHAC1	1
GO:1904861	excitatory synapse assembly	1/80	25/15278	0.123093	0.319344	0.292226	LRRC4B	1
GO:0030218	erythrocyte differentiation	2/80	117/15278	0.125239	0.323991	0.296478	ACVR1B/THRA	2
GO:0070972	protein localization to endoplasmic reticulum	2/80	117/15278	0.125239	0.323991	0.296478	KDELR2/RYR2	2
GO:0014013	regulation of gliogenesis	2/80	118/15278	0.126984	0.324826	0.297242	ETV5/RNF112	2
GO:0022612	gland morphogenesis	2/80	118/15278	0.126984	0.324826	0.297242	ETV5/IGFBP5	2
GO:0035270	endocrine system development	2/80	118/15278	0.126984	0.324826	0.297242	THRA/CITED2	2
GO:0003171	atrioventricular valve development	1/80	26/15278	0.127692	0.324826	0.297242	HEYL	1
GO:0010460	positive regulation of heart rate	1/80	26/15278	0.127692	0.324826	0.297242	RYR2	1
GO:0030318	melanocyte differentiation	1/80	26/15278	0.127692	0.324826	0.297242	CITED1	1
GO:0031069	hair follicle morphogenesis	1/80	26/15278	0.127692	0.324826	0.297242	IGFBP5	1
GO:0033561	regulation of water loss via skin	1/80	26/15278	0.127692	0.324826	0.297242	GBA	1
GO:0043153	entrainment of circadian clock by photoperiod	1/80	26/15278	0.127692	0.324826	0.297242	SIK1	1
GO:0045672	positive regulation of osteoclast differentiation	1/80	26/15278	0.127692	0.324826	0.297242	FOS	1
GO:0051953	negative regulation of amine transport	1/80	26/15278	0.127692	0.324826	0.297242	SYT4	1
GO:0055083	monovalent inorganic anion homeostasis	1/80	26/15278	0.127692	0.324826	0.297242	SFRP4	1
GO:0010811	positive regulation of cell-substrate adhesion	2/80	120/15278	0.130493	0.327327	0.299531	P4HB/CDH13	2
GO:1904892	regulation of receptor signaling pathway via STAT	2/80	120/15278	0.130493	0.327327	0.299531	RET/PTPRT	2
GO:0003180	aortic valve morphogenesis	1/80	27/15278	0.132268	0.327327	0.299531	HEYL	1
GO:0006735	NADH regeneration	1/80	27/15278	0.132268	0.327327	0.299531	ALDOC	1
GO:0008045	motor neuron axon guidance	1/80	27/15278	0.132268	0.327327	0.299531	PLXNA4	1
GO:0010880	regulation of release of sequestered calcium ion into cytosol by sarcoplasmic reticulum	1/80	27/15278	0.132268	0.327327	0.299531	RYR2	1
GO:0014912	negative regulation of smooth muscle cell migration	1/80	27/15278	0.132268	0.327327	0.299531	IGFBP5	1
GO:0018126	protein hydroxylation	1/80	27/15278	0.132268	0.327327	0.299531	P4HB	1
GO:0019098	reproductive behavior	1/80	27/15278	0.132268	0.327327	0.299531	THRA	1
GO:0021602	cranial nerve morphogenesis	1/80	27/15278	0.132268	0.327327	0.299531	PLXNA4	1
GO:0033032	regulation of myeloid cell apoptotic process	1/80	27/15278	0.132268	0.327327	0.299531	THRA	1
GO:0055094	response to lipoprotein particle	1/80	27/15278	0.132268	0.327327	0.299531	CDH13	1
GO:0061621	canonical glycolysis	1/80	27/15278	0.132268	0.327327	0.299531	ALDOC	1
GO:0061718	glucose catabolic process to pyruvate	1/80	27/15278	0.132268	0.327327	0.299531	ALDOC	1
GO:0065005	protein-lipid complex assembly	1/80	27/15278	0.132268	0.327327	0.299531	P4HB	1
GO:0070723	response to cholesterol	1/80	27/15278	0.132268	0.327327	0.299531	LRP8	1
GO:0099560	synaptic membrane adhesion	1/80	27/15278	0.132268	0.327327	0.299531	LRRC4B	1
GO:1902175	regulation of oxidative stress-induced intrinsic apoptotic signaling pathway	1/80	27/15278	0.132268	0.327327	0.299531	P4HB	1
GO:1903203	regulation of oxidative stress-induced neuron death	1/80	27/15278	0.132268	0.327327	0.299531	ATF4	1
GO:0003007	heart morphogenesis	3/80	241/15278	0.132434	0.327327	0.299531	RYR2/HEYL/CITED2	3
GO:0032412	regulation of ion transmembrane transporter activity	3/80	241/15278	0.132434	0.327327	0.299531	KCNAB1/OPRL1/RYR2	3
GO:2000027	regulation of animal organ morphogenesis	3/80	242/15278	0.133618	0.329807	0.3018	CITED1/ETV5/CITED2	3
GO:0001503	ossification	4/80	377/15278	0.135433	0.332328	0.304107	CITED1/IGFBP5/THRA/ATF4	4
GO:0010575	positive regulation of vascular endothelial growth factor production	1/80	28/15278	0.13682	0.332328	0.304107	ATF4	1
GO:0034390	smooth muscle cell apoptotic process	1/80	28/15278	0.13682	0.332328	0.304107	ATF4	1
GO:0034391	regulation of smooth muscle cell apoptotic process	1/80	28/15278	0.13682	0.332328	0.304107	ATF4	1
GO:0046596	regulation of viral entry into host cell	1/80	28/15278	0.13682	0.332328	0.304107	P4HB	1
GO:0048147	negative regulation of fibroblast proliferation	1/80	28/15278	0.13682	0.332328	0.304107	C1QL4	1
GO:0048265	response to pain	1/80	28/15278	0.13682	0.332328	0.304107	RET	1
GO:0051385	response to mineralocorticoid	1/80	28/15278	0.13682	0.332328	0.304107	FOS	1
GO:0061620	glycolytic process through glucose-6-phosphate	1/80	28/15278	0.13682	0.332328	0.304107	ALDOC	1
GO:0071276	cellular response to cadmium ion	1/80	28/15278	0.13682	0.332328	0.304107	FOS	1
GO:1902235	regulation of endoplasmic reticulum stress-induced intrinsic apoptotic signaling pathway	1/80	28/15278	0.13682	0.332328	0.304107	ERP29	1
GO:1904893	negative regulation of receptor signaling pathway via STAT	1/80	28/15278	0.13682	0.332328	0.304107	PTPRT	1
GO:2001233	regulation of apoptotic signaling pathway	4/80	379/15278	0.137303	0.333061	0.304778	RET/P4HB/SCG2/ERP29	4
GO:0034101	erythrocyte homeostasis	2/80	124/15278	0.137577	0.333282	0.30498	ACVR1B/THRA	2
GO:0009165	nucleotide biosynthetic process	3/80	246/15278	0.138389	0.334807	0.306376	UCK2/ADCY8/NME1	3
GO:0006165	nucleoside diphosphate phosphorylation	2/80	125/15278	0.139361	0.336184	0.307635	NME1/ALDOC	2
GO:0010644	cell communication by electrical coupling	1/80	29/15278	0.141348	0.336184	0.307635	RYR2	1
GO:0014808	release of sequestered calcium ion into cytosol by sarcoplasmic reticulum	1/80	29/15278	0.141348	0.336184	0.307635	RYR2	1
GO:0036474	cell death in response to hydrogen peroxide	1/80	29/15278	0.141348	0.336184	0.307635	RNF112	1
GO:0060292	long-term synaptic depression	1/80	29/15278	0.141348	0.336184	0.307635	ADCY8	1
GO:0061615	glycolytic process through fructose-6-phosphate	1/80	29/15278	0.141348	0.336184	0.307635	ALDOC	1
GO:0071402	cellular response to lipoprotein particle stimulus	1/80	29/15278	0.141348	0.336184	0.307635	CDH13	1
GO:0086019	cell-cell signaling involved in cardiac conduction	1/80	29/15278	0.141348	0.336184	0.307635	RYR2	1
GO:0098901	regulation of cardiac muscle cell action potential	1/80	29/15278	0.141348	0.336184	0.307635	RYR2	1
GO:0099068	postsynapse assembly	1/80	29/15278	0.141348	0.336184	0.307635	LRRC4B	1
GO:1904738	vascular associated smooth muscle cell migration	1/80	29/15278	0.141348	0.336184	0.307635	IGFBP5	1
GO:1904752	regulation of vascular associated smooth muscle cell migration	1/80	29/15278	0.141348	0.336184	0.307635	IGFBP5	1
GO:2000352	negative regulation of endothelial cell apoptotic process	1/80	29/15278	0.141348	0.336184	0.307635	SCG2	1
GO:1901293	nucleoside phosphate biosynthetic process	3/80	249/15278	0.142006	0.336399	0.307832	UCK2/ADCY8/NME1	3
GO:0046939	nucleotide phosphorylation	2/80	127/15278	0.142945	0.336399	0.307832	NME1/ALDOC	2
GO:0009259	ribonucleotide metabolic process	4/80	386/15278	0.143933	0.336399	0.307832	UCK2/ADCY8/NME1/ALDOC	4
GO:0030099	myeloid cell differentiation	4/80	386/15278	0.143933	0.336399	0.307832	FOS/ACVR1B/NME1/THRA	4
GO:0022898	regulation of transmembrane transporter activity	3/80	252/15278	0.145655	0.336399	0.307832	KCNAB1/OPRL1/RYR2	3
GO:0006213	pyrimidine nucleoside metabolic process	1/80	30/15278	0.145853	0.336399	0.307832	UCK2	1
GO:0006356	regulation of transcription by RNA polymerase I	1/80	30/15278	0.145853	0.336399	0.307832	ATF4	1
GO:0009648	photoperiodism	1/80	30/15278	0.145853	0.336399	0.307832	SIK1	1
GO:0010661	positive regulation of muscle cell apoptotic process	1/80	30/15278	0.145853	0.336399	0.307832	ATF4	1
GO:0018279	protein N-linked glycosylation via asparagine	1/80	30/15278	0.145853	0.336399	0.307832	RPN2	1
GO:0036475	neuron death in response to oxidative stress	1/80	30/15278	0.145853	0.336399	0.307832	ATF4	1
GO:0042755	eating behavior	1/80	30/15278	0.145853	0.336399	0.307832	OPRL1	1
GO:0045648	positive regulation of erythrocyte differentiation	1/80	30/15278	0.145853	0.336399	0.307832	ACVR1B	1
GO:0045920	negative regulation of exocytosis	1/80	30/15278	0.145853	0.336399	0.307832	SYT4	1
GO:0046688	response to copper ion	1/80	30/15278	0.145853	0.336399	0.307832	PAM	1
GO:0048730	epidermis morphogenesis	1/80	30/15278	0.145853	0.336399	0.307832	IGFBP5	1
GO:0060251	regulation of glial cell proliferation	1/80	30/15278	0.145853	0.336399	0.307832	ETV5	1
GO:0070670	response to interleukin-4	1/80	30/15278	0.145853	0.336399	0.307832	CITED1	1
GO:0071480	cellular response to gamma radiation	1/80	30/15278	0.145853	0.336399	0.307832	CRYAB	1
GO:0097106	postsynaptic density organization	1/80	30/15278	0.145853	0.336399	0.307832	LRRC4B	1
GO:0098760	response to interleukin-7	1/80	30/15278	0.145853	0.336399	0.307832	P4HB	1
GO:0098761	cellular response to interleukin-7	1/80	30/15278	0.145853	0.336399	0.307832	P4HB	1
GO:1903514	release of sequestered calcium ion into cytosol by endoplasmic reticulum	1/80	30/15278	0.145853	0.336399	0.307832	RYR2	1
GO:1903792	negative regulation of anion transport	1/80	30/15278	0.145853	0.336399	0.307832	SFRP4	1
GO:0001508	action potential	2/80	130/15278	0.148358	0.337375	0.308726	RYR2/GBA	2
GO:0050921	positive regulation of chemotaxis	2/80	131/15278	0.150172	0.337375	0.308726	SCG2/CDH13	2
GO:0003091	renal water homeostasis	1/80	31/15278	0.150334	0.337375	0.308726	ADCY8	1
GO:0003176	aortic valve development	1/80	31/15278	0.150334	0.337375	0.308726	HEYL	1
GO:0003338	metanephros morphogenesis	1/80	31/15278	0.150334	0.337375	0.308726	CITED1	1
GO:0009649	entrainment of circadian clock	1/80	31/15278	0.150334	0.337375	0.308726	SIK1	1
GO:0014072	response to isoquinoline alkaloid	1/80	31/15278	0.150334	0.337375	0.308726	ADCY8	1
GO:0018196	peptidyl-asparagine modification	1/80	31/15278	0.150334	0.337375	0.308726	RPN2	1
GO:0021955	central nervous system neuron axonogenesis	1/80	31/15278	0.150334	0.337375	0.308726	PLXNA4	1
GO:0030201	heparan sulfate proteoglycan metabolic process	1/80	31/15278	0.150334	0.337375	0.308726	GLCE	1
GO:0030431	sleep	1/80	31/15278	0.150334	0.337375	0.308726	FOS	1
GO:0033028	myeloid cell apoptotic process	1/80	31/15278	0.150334	0.337375	0.308726	THRA	1
GO:0043276	anoikis	1/80	31/15278	0.150334	0.337375	0.308726	SIK1	1
GO:0043278	response to morphine	1/80	31/15278	0.150334	0.337375	0.308726	ADCY8	1
GO:0045761	regulation of adenylate cyclase activity	1/80	31/15278	0.150334	0.337375	0.308726	GABBR2	1
GO:0048384	retinoic acid receptor signaling pathway	1/80	31/15278	0.150334	0.337375	0.308726	CREM	1
GO:0048841	regulation of axon extension involved in axon guidance	1/80	31/15278	0.150334	0.337375	0.308726	PLXNA4	1
GO:0051930	regulation of sensory perception of pain	1/80	31/15278	0.150334	0.337375	0.308726	OPRL1	1
GO:0060603	mammary gland duct morphogenesis	1/80	31/15278	0.150334	0.337375	0.308726	ETV5	1
GO:0061311	cell surface receptor signaling pathway involved in heart development	1/80	31/15278	0.150334	0.337375	0.308726	HEYL	1
GO:0110111	negative regulation of animal organ morphogenesis	1/80	31/15278	0.150334	0.337375	0.308726	CITED1	1
GO:1901020	negative regulation of calcium ion transmembrane transporter activity	1/80	31/15278	0.150334	0.337375	0.308726	OPRL1	1
GO:0045785	positive regulation of cell adhesion	4/80	393/15278	0.150689	0.337758	0.309076	RET/P4HB/CDH13/CITED2	4
GO:0042542	response to hydrogen peroxide	2/80	132/15278	0.15199	0.339873	0.311012	CRYAB/RNF112	2
GO:0019693	ribose phosphate metabolic process	4/80	396/15278	0.153622	0.339873	0.311012	UCK2/ADCY8/NME1/ALDOC	4
GO:0007266	Rho protein signal transduction	2/80	133/15278	0.153812	0.339873	0.311012	CDH13/ARHGEF28	2
GO:0031644	regulation of nervous system process	2/80	133/15278	0.153812	0.339873	0.311012	OPRL1/GBA	2
GO:0048284	organelle fusion	2/80	133/15278	0.153812	0.339873	0.311012	SYT9/SYT4	2
GO:0051224	negative regulation of protein transport	2/80	133/15278	0.153812	0.339873	0.311012	ERP29/SYT4	2
GO:0007616	long-term memory	1/80	32/15278	0.154792	0.339873	0.311012	ADCY8	1
GO:0033120	positive regulation of RNA splicing	1/80	32/15278	0.154792	0.339873	0.311012	SLC38A2	1
GO:0036314	response to sterol	1/80	32/15278	0.154792	0.339873	0.311012	LRP8	1
GO:0043094	cellular metabolic compound salvage	1/80	32/15278	0.154792	0.339873	0.311012	UCK2	1
GO:0043243	positive regulation of protein-containing complex disassembly	1/80	32/15278	0.154792	0.339873	0.311012	GBA	1
GO:0048665	neuron fate specification	1/80	32/15278	0.154792	0.339873	0.311012	MYT1L	1
GO:0051482	positive regulation of cytosolic calcium ion concentration involved in phospholipase C-activating G protein-coupled signaling pathway	1/80	32/15278	0.154792	0.339873	0.311012	OPRL1	1
GO:0051931	regulation of sensory perception	1/80	32/15278	0.154792	0.339873	0.311012	OPRL1	1
GO:0060317	cardiac epithelial to mesenchymal transition	1/80	32/15278	0.154792	0.339873	0.311012	HEYL	1
GO:0099084	postsynaptic specialization organization	1/80	32/15278	0.154792	0.339873	0.311012	LRRC4B	1
GO:1903427	negative regulation of reactive oxygen species biosynthetic process	1/80	32/15278	0.154792	0.339873	0.311012	GLA	1
GO:0043270	positive regulation of ion transport	3/80	260/15278	0.155536	0.340915	0.311965	RYR2/SYT4/ATF4	3
GO:0007189	adenylate cyclase-activating G protein-coupled receptor signaling pathway	2/80	134/15278	0.155639	0.340915	0.311965	OPRL1/ADCY8	2
GO:0060485	mesenchyme development	3/80	261/15278	0.156785	0.343015	0.313887	RET/HEYL/CITED2	3
GO:0009156	ribonucleoside monophosphate biosynthetic process	1/80	33/15278	0.159227	0.344003	0.314791	UCK2	1
GO:0033762	response to glucagon	1/80	33/15278	0.159227	0.344003	0.314791	ADCY8	1
GO:0034405	response to fluid shear stress	1/80	33/15278	0.159227	0.344003	0.314791	CITED2	1
GO:0035774	positive regulation of insulin secretion involved in cellular response to glucose stimulus	1/80	33/15278	0.159227	0.344003	0.314791	ADCY8	1
GO:0043330	response to exogenous dsRNA	1/80	33/15278	0.159227	0.344003	0.314791	SLC3A2	1
GO:0060416	response to growth hormone	1/80	33/15278	0.159227	0.344003	0.314791	IGFBP5	1
GO:0070306	lens fiber cell differentiation	1/80	33/15278	0.159227	0.344003	0.314791	ATF4	1
GO:1904037	positive regulation of epithelial cell apoptotic process	1/80	33/15278	0.159227	0.344003	0.314791	SFRP4	1
GO:1905606	regulation of presynapse assembly	1/80	33/15278	0.159227	0.344003	0.314791	LRRC4B	1
GO:0032409	regulation of transporter activity	3/80	263/15278	0.159295	0.344003	0.314791	KCNAB1/OPRL1/RYR2	3
GO:1904950	negative regulation of establishment of protein localization	2/80	136/15278	0.159306	0.344003	0.314791	ERP29/SYT4	2
GO:0051146	striated muscle cell differentiation	3/80	264/15278	0.160554	0.345881	0.31651	IGFBP5/SIK1/FHOD3	3
GO:0051604	protein maturation	3/80	264/15278	0.160554	0.345881	0.31651	PCSK1/PCSK2/CHAC1	3
GO:0106106	cold-induced thermogenesis	2/80	137/15278	0.161145	0.346339	0.316929	THRA/ATF4	2
GO:0120161	regulation of cold-induced thermogenesis	2/80	137/15278	0.161145	0.346339	0.316929	THRA/ATF4	2
GO:0010212	response to ionizing radiation	2/80	138/15278	0.162989	0.346407	0.316991	AEN/CRYAB	2
GO:0003203	endocardial cushion morphogenesis	1/80	34/15278	0.163639	0.346407	0.316991	HEYL	1
GO:0007618	mating	1/80	34/15278	0.163639	0.346407	0.316991	THRA	1
GO:0014741	negative regulation of muscle hypertrophy	1/80	34/15278	0.163639	0.346407	0.316991	IGFBP5	1
GO:0016339	calcium-dependent cell-cell adhesion via plasma membrane cell adhesion molecules	1/80	34/15278	0.163639	0.346407	0.316991	CDH13	1
GO:0019228	neuronal action potential	1/80	34/15278	0.163639	0.346407	0.316991	GBA	1
GO:0048536	spleen development	1/80	34/15278	0.163639	0.346407	0.316991	CITED2	1
GO:0051354	negative regulation of oxidoreductase activity	1/80	34/15278	0.163639	0.346407	0.316991	GLA	1
GO:0052372	modulation by symbiont of entry into host	1/80	34/15278	0.163639	0.346407	0.316991	P4HB	1
GO:0070296	sarcoplasmic reticulum calcium ion transport	1/80	34/15278	0.163639	0.346407	0.316991	RYR2	1
GO:0086005	ventricular cardiac muscle cell action potential	1/80	34/15278	0.163639	0.346407	0.316991	RYR2	1
GO:0099174	regulation of presynapse organization	1/80	34/15278	0.163639	0.346407	0.316991	LRRC4B	1
GO:1902742	apoptotic process involved in development	1/80	34/15278	0.163639	0.346407	0.316991	CRYAB	1
GO:0048608	reproductive structure development	4/80	407/15278	0.16456	0.347333	0.317838	VGF/CITED1/PTPRN/CITED2	4
GO:0007612	learning	2/80	139/15278	0.164836	0.347333	0.317838	FOS/OPRL1	2
GO:0035051	cardiocyte differentiation	2/80	139/15278	0.164836	0.347333	0.317838	SIK1/FHOD3	2
GO:1905039	carboxylic acid transmembrane transport	2/80	139/15278	0.164836	0.347333	0.317838	SLC38A2/SLC3A2	2
GO:0001667	ameboidal-type cell migration	4/80	408/15278	0.165569	0.34844	0.318851	RET/SCG2/CDH13/ACVR1B	4
GO:0097696	receptor signaling pathway via STAT	2/80	140/15278	0.166687	0.34844	0.318851	RET/PTPRT	2
GO:1903825	organic acid transmembrane transport	2/80	140/15278	0.166687	0.34844	0.318851	SLC38A2/SLC3A2	2
GO:0001822	kidney development	3/80	269/15278	0.166897	0.34844	0.318851	CITED1/RET/HEYL	3
GO:0032868	response to insulin	3/80	269/15278	0.166897	0.34844	0.318851	VGF/CITED1/PTPRN	3
GO:0006007	glucose catabolic process	1/80	35/15278	0.168028	0.34844	0.318851	ALDOC	1
GO:0007190	activation of adenylate cyclase activity	1/80	35/15278	0.168028	0.34844	0.318851	ADCY8	1
GO:0010259	multicellular organism aging	1/80	35/15278	0.168028	0.34844	0.318851	CRYAB	1
GO:0032094	response to food	1/80	35/15278	0.168028	0.34844	0.318851	NUCB2	1
GO:0032892	positive regulation of organic acid transport	1/80	35/15278	0.168028	0.34844	0.318851	SYT4	1
GO:0033144	negative regulation of intracellular steroid hormone receptor signaling pathway	1/80	35/15278	0.168028	0.34844	0.318851	HEYL	1
GO:0051955	regulation of amino acid transport	1/80	35/15278	0.168028	0.34844	0.318851	SYT4	1
GO:0070897	transcription preinitiation complex assembly	1/80	35/15278	0.168028	0.34844	0.318851	THRA	1
GO:1903170	negative regulation of calcium ion transmembrane transport	1/80	35/15278	0.168028	0.34844	0.318851	OPRL1	1
GO:0061458	reproductive system development	4/80	411/15278	0.168608	0.349245	0.319588	VGF/CITED1/PTPRN/CITED2	4
GO:1903169	regulation of calcium ion transmembrane transport	2/80	143/15278	0.172263	0.352302	0.322385	OPRL1/RYR2	2
GO:0043902	positive regulation of multi-organism process	1/80	36/15278	0.172395	0.352302	0.322385	ACVR1B	1
GO:0044058	regulation of digestive system process	1/80	36/15278	0.172395	0.352302	0.322385	OPRL1	1
GO:0048009	insulin-like growth factor receptor signaling pathway	1/80	36/15278	0.172395	0.352302	0.322385	IGFBP5	1
GO:0048846	axon extension involved in axon guidance	1/80	36/15278	0.172395	0.352302	0.322385	PLXNA4	1
GO:0050775	positive regulation of dendrite morphogenesis	1/80	36/15278	0.172395	0.352302	0.322385	LRP8	1
GO:0051954	positive regulation of amine transport	1/80	36/15278	0.172395	0.352302	0.322385	SYT4	1
GO:0060428	lung epithelium development	1/80	36/15278	0.172395	0.352302	0.322385	THRA	1
GO:1901068	guanosine-containing compound metabolic process	1/80	36/15278	0.172395	0.352302	0.322385	NME1	1
GO:1901385	regulation of voltage-gated calcium channel activity	1/80	36/15278	0.172395	0.352302	0.322385	OPRL1	1
GO:1902284	neuron projection extension involved in neuron projection guidance	1/80	36/15278	0.172395	0.352302	0.322385	PLXNA4	1
GO:1905314	semi-lunar valve development	1/80	36/15278	0.172395	0.352302	0.322385	HEYL	1
GO:0043254	regulation of protein-containing complex assembly	4/80	416/15278	0.173717	0.354608	0.324495	CRYAB/FHOD3/GBA/THRA	4
GO:0048754	branching morphogenesis of an epithelial tube	2/80	144/15278	0.174128	0.354655	0.324538	CITED1/ETV5	2
GO:1902904	negative regulation of supramolecular fiber organization	2/80	144/15278	0.174128	0.354655	0.324538	CRYAB/FHOD3	2
GO:0010256	endomembrane system organization	4/80	418/15278	0.175776	0.3564	0.326135	PTPRN/RNF112/TMED3/SYT4	4
GO:0019932	second-messenger-mediated signaling	4/80	418/15278	0.175776	0.3564	0.326135	CDH13/OPRL1/ADCY8/RYR2	4
GO:0000578	embryonic axis specification	1/80	37/15278	0.176739	0.3564	0.326135	CITED1	1
GO:0003156	regulation of animal organ formation	1/80	37/15278	0.176739	0.3564	0.326135	CITED2	1
GO:0045746	negative regulation of Notch signaling pathway	1/80	37/15278	0.176739	0.3564	0.326135	CHAC1	1
GO:0050850	positive regulation of calcium-mediated signaling	1/80	37/15278	0.176739	0.3564	0.326135	CDH13	1
GO:0060260	regulation of transcription initiation from RNA polymerase II promoter	1/80	37/15278	0.176739	0.3564	0.326135	THRA	1
GO:0090184	positive regulation of kidney development	1/80	37/15278	0.176739	0.3564	0.326135	RET	1
GO:1900026	positive regulation of substrate adhesion-dependent cell spreading	1/80	37/15278	0.176739	0.3564	0.326135	P4HB	1
GO:0006874	cellular calcium ion homeostasis	4/80	420/15278	0.177844	0.35789	0.327499	OPRL1/ADCY8/RYR2/ATF4	4
GO:0048660	regulation of smooth muscle cell proliferation	2/80	146/15278	0.177869	0.35789	0.327499	IGFBP5/CDH13	2
GO:0072001	renal system development	3/80	278/15278	0.178498	0.358009	0.327608	CITED1/RET/HEYL	3
GO:0000187	activation of MAPK activity	2/80	147/15278	0.179744	0.358009	0.327608	RET/ERP29	2
GO:0009132	nucleoside diphosphate metabolic process	2/80	147/15278	0.179744	0.358009	0.327608	NME1/ALDOC	2
GO:0031214	biomineral tissue development	2/80	147/15278	0.179744	0.358009	0.327608	SLC20A1/ATF4	2
GO:0110148	biomineralization	2/80	147/15278	0.179744	0.358009	0.327608	SLC20A1/ATF4	2
GO:1903531	negative regulation of secretion by cell	2/80	147/15278	0.179744	0.358009	0.327608	ERP29/SYT4	2
GO:1990845	adaptive thermogenesis	2/80	147/15278	0.179744	0.358009	0.327608	THRA/ATF4	2
GO:0001941	postsynaptic membrane organization	1/80	38/15278	0.18106	0.358009	0.327608	ETV5	1
GO:0006749	glutathione metabolic process	1/80	38/15278	0.18106	0.358009	0.327608	CHAC1	1
GO:0010574	regulation of vascular endothelial growth factor production	1/80	38/15278	0.18106	0.358009	0.327608	ATF4	1
GO:0014911	positive regulation of smooth muscle cell migration	1/80	38/15278	0.18106	0.358009	0.327608	IGFBP5	1
GO:0016601	Rac protein signal transduction	1/80	38/15278	0.18106	0.358009	0.327608	CDH13	1
GO:0071526	semaphorin-plexin signaling pathway	1/80	38/15278	0.18106	0.358009	0.327608	PLXNA4	1
GO:0089718	amino acid import across plasma membrane	1/80	38/15278	0.18106	0.358009	0.327608	SLC3A2	1
GO:0090207	regulation of triglyceride metabolic process	1/80	38/15278	0.18106	0.358009	0.327608	SIK1	1
GO:1901021	positive regulation of calcium ion transmembrane transporter activity	1/80	38/15278	0.18106	0.358009	0.327608	RYR2	1
GO:0048659	smooth muscle cell proliferation	2/80	148/15278	0.181623	0.358734	0.328271	IGFBP5/CDH13	2
GO:0001936	regulation of endothelial cell proliferation	2/80	149/15278	0.183504	0.360335	0.329736	SCG2/CDH13	2
GO:0002262	myeloid cell homeostasis	2/80	149/15278	0.183504	0.360335	0.329736	ACVR1B/THRA	2
GO:0071772	response to BMP	2/80	149/15278	0.183504	0.360335	0.329736	HEYL/SFRP4	2
GO:0071773	cellular response to BMP stimulus	2/80	149/15278	0.183504	0.360335	0.329736	HEYL/SFRP4	2
GO:0006734	NADH metabolic process	1/80	39/15278	0.185359	0.360335	0.329736	ALDOC	1
GO:0009187	cyclic nucleotide metabolic process	1/80	39/15278	0.185359	0.360335	0.329736	ADCY8	1
GO:0019432	triglyceride biosynthetic process	1/80	39/15278	0.185359	0.360335	0.329736	SIK1	1
GO:0030866	cortical actin cytoskeleton organization	1/80	39/15278	0.185359	0.360335	0.329736	FHOD3	1
GO:0043331	response to dsRNA	1/80	39/15278	0.185359	0.360335	0.329736	SLC3A2	1
GO:0045684	positive regulation of epidermis development	1/80	39/15278	0.185359	0.360335	0.329736	SFRP4	1
GO:0071548	response to dexamethasone	1/80	39/15278	0.185359	0.360335	0.329736	GBA	1
GO:0086004	regulation of cardiac muscle cell contraction	1/80	39/15278	0.185359	0.360335	0.329736	RYR2	1
GO:1902895	positive regulation of pri-miRNA transcription by RNA polymerase II	1/80	39/15278	0.185359	0.360335	0.329736	FOS	1
GO:0030856	regulation of epithelial cell differentiation	2/80	150/15278	0.185388	0.360335	0.329736	CITED1/SFRP4	2
GO:2001236	regulation of extrinsic apoptotic signaling pathway	2/80	150/15278	0.185388	0.360335	0.329736	RET/SCG2	2
GO:2001242	regulation of intrinsic apoptotic signaling pathway	2/80	151/15278	0.187276	0.363617	0.332739	P4HB/ERP29	2
GO:2000241	regulation of reproductive process	2/80	152/15278	0.189166	0.365868	0.334799	ACVR1B/CITED2	2
GO:0055074	calcium ion homeostasis	4/80	431/15278	0.189364	0.365868	0.334799	OPRL1/ADCY8/RYR2/ATF4	4
GO:0030521	androgen receptor signaling pathway	1/80	40/15278	0.189635	0.365868	0.334799	HEYL	1
GO:0038084	vascular endothelial growth factor signaling pathway	1/80	40/15278	0.189635	0.365868	0.334799	CD63	1
GO:0045823	positive regulation of heart contraction	1/80	40/15278	0.189635	0.365868	0.334799	RYR2	1
GO:1904707	positive regulation of vascular associated smooth muscle cell proliferation	1/80	40/15278	0.189635	0.365868	0.334799	IGFBP5	1
GO:0030336	negative regulation of cell migration	3/80	287/15278	0.190317	0.366797	0.335649	IGFBP5/PTPRT/CITED2	3
GO:1903305	regulation of regulated secretory pathway	2/80	154/15278	0.192954	0.370172	0.338737	SYT9/SYT4	2
GO:0035307	positive regulation of protein dephosphorylation	1/80	41/15278	0.19389	0.370172	0.338737	GBA	1
GO:0045214	sarcomere organization	1/80	41/15278	0.19389	0.370172	0.338737	FHOD3	1
GO:0046189	phenol-containing compound biosynthetic process	1/80	41/15278	0.19389	0.370172	0.338737	CITED1	1
GO:0046717	acid secretion	1/80	41/15278	0.19389	0.370172	0.338737	OPRL1	1
GO:0048286	lung alveolus development	1/80	41/15278	0.19389	0.370172	0.338737	IGFBP5	1
GO:0072595	maintenance of protein localization in organelle	1/80	41/15278	0.19389	0.370172	0.338737	KDELR2	1
GO:1904036	negative regulation of epithelial cell apoptotic process	1/80	41/15278	0.19389	0.370172	0.338737	SCG2	1
GO:2000648	positive regulation of stem cell proliferation	1/80	41/15278	0.19389	0.370172	0.338737	CITED1	1
GO:0030307	positive regulation of cell growth	2/80	156/15278	0.196752	0.372804	0.341146	UNC13A/SYT4	2
GO:0034614	cellular response to reactive oxygen species	2/80	156/15278	0.196752	0.372804	0.341146	FOS/RNF112	2
GO:0007204	positive regulation of cytosolic calcium ion concentration	3/80	292/15278	0.19697	0.372804	0.341146	OPRL1/ADCY8/RYR2	3
GO:0009416	response to light stimulus	3/80	292/15278	0.19697	0.372804	0.341146	FOS/SIK1/ATF4	3
GO:0009124	nucleoside monophosphate biosynthetic process	1/80	42/15278	0.198122	0.372804	0.341146	UCK2	1
GO:0010573	vascular endothelial growth factor production	1/80	42/15278	0.198122	0.372804	0.341146	ATF4	1
GO:0042771	intrinsic apoptotic signaling pathway in response to DNA damage by p53 class mediator	1/80	42/15278	0.198122	0.372804	0.341146	AEN	1
GO:0043090	amino acid import	1/80	42/15278	0.198122	0.372804	0.341146	SLC3A2	1
GO:0045687	positive regulation of glial cell differentiation	1/80	42/15278	0.198122	0.372804	0.341146	RNF112	1
GO:0045776	negative regulation of blood pressure	1/80	42/15278	0.198122	0.372804	0.341146	OPRL1	1
GO:0060999	positive regulation of dendritic spine development	1/80	42/15278	0.198122	0.372804	0.341146	LRP8	1
GO:0071827	plasma lipoprotein particle organization	1/80	42/15278	0.198122	0.372804	0.341146	P4HB	1
GO:1902667	regulation of axon guidance	1/80	42/15278	0.198122	0.372804	0.341146	PLXNA4	1
GO:1903146	regulation of autophagy of mitochondrion	1/80	42/15278	0.198122	0.372804	0.341146	GBA	1
GO:1903706	regulation of hemopoiesis	4/80	441/15278	0.200043	0.375952	0.344027	FOS/ACVR1B/LMO2/NME1	4
GO:0017148	negative regulation of translation	2/80	158/15278	0.20056	0.375952	0.344027	IGFBP5/ATF4	2
GO:0043588	skin development	3/80	295/15278	0.20099	0.375952	0.344027	IGFBP5/ACVR1B/GBA	3
GO:0006904	vesicle docking involved in exocytosis	1/80	43/15278	0.202333	0.375952	0.344027	UNC13A	1
GO:0008631	intrinsic apoptotic signaling pathway in response to oxidative stress	1/80	43/15278	0.202333	0.375952	0.344027	P4HB	1
GO:0010677	negative regulation of cellular carbohydrate metabolic process	1/80	43/15278	0.202333	0.375952	0.344027	SIK1	1
GO:0014888	striated muscle adaptation	1/80	43/15278	0.202333	0.375952	0.344027	IGFBP5	1
GO:0035722	interleukin-12-mediated signaling pathway	1/80	43/15278	0.202333	0.375952	0.344027	P4HB	1
GO:0043616	keratinocyte proliferation	1/80	43/15278	0.202333	0.375952	0.344027	CDH13	1
GO:0071354	cellular response to interleukin-6	1/80	43/15278	0.202333	0.375952	0.344027	PTPRT	1
GO:1903115	regulation of actin filament-based movement	1/80	43/15278	0.202333	0.375952	0.344027	RYR2	1
GO:2001239	regulation of extrinsic apoptotic signaling pathway in absence of ligand	1/80	43/15278	0.202333	0.375952	0.344027	RET	1
GO:0009152	purine ribonucleotide biosynthetic process	2/80	159/15278	0.202467	0.375952	0.344027	ADCY8/NME1	2
GO:0061025	membrane fusion	2/80	160/15278	0.204377	0.377727	0.345651	SYT9/SYT4	2
GO:0098656	anion transmembrane transport	3/80	298/15278	0.20503	0.377727	0.345651	SLC38A2/SLC3A2/SLC20A1	3
GO:0072503	cellular divalent inorganic cation homeostasis	4/80	446/15278	0.205451	0.377727	0.345651	OPRL1/ADCY8/RYR2/ATF4	4
GO:2000146	negative regulation of cell motility	3/80	299/15278	0.206381	0.377727	0.345651	IGFBP5/PTPRT/CITED2	3
GO:0002762	negative regulation of myeloid leukocyte differentiation	1/80	44/15278	0.206521	0.377727	0.345651	NME1	1
GO:0003197	endocardial cushion development	1/80	44/15278	0.206521	0.377727	0.345651	HEYL	1
GO:0006418	tRNA aminoacylation for protein translation	1/80	44/15278	0.206521	0.377727	0.345651	TARS1	1
GO:0010862	positive regulation of pathway-restricted SMAD protein phosphorylation	1/80	44/15278	0.206521	0.377727	0.345651	ACVR1B	1
GO:0017145	stem cell division	1/80	44/15278	0.206521	0.377727	0.345651	ETV5	1
GO:0032570	response to progesterone	1/80	44/15278	0.206521	0.377727	0.345651	FOS	1
GO:0035850	epithelial cell differentiation involved in kidney development	1/80	44/15278	0.206521	0.377727	0.345651	CITED1	1
GO:0042398	cellular modified amino acid biosynthetic process	1/80	44/15278	0.206521	0.377727	0.345651	CHAC1	1
GO:0048255	mRNA stabilization	1/80	44/15278	0.206521	0.377727	0.345651	TENT5A	1
GO:0055010	ventricular cardiac muscle tissue morphogenesis	1/80	44/15278	0.206521	0.377727	0.345651	RYR2	1
GO:0071349	cellular response to interleukin-12	1/80	44/15278	0.206521	0.377727	0.345651	P4HB	1
GO:0006470	protein dephosphorylation	3/80	300/15278	0.207734	0.379565	0.347333	PTPRN/PTPRT/GBA	3
GO:0001935	endothelial cell proliferation	2/80	162/15278	0.208202	0.380028	0.347757	SCG2/CDH13	2
GO:0051260	protein homooligomerization	2/80	163/15278	0.210117	0.380028	0.347757	RNF112/ADCY8	2
GO:0010043	response to zinc ion	1/80	45/15278	0.210688	0.380028	0.347757	PAM	1
GO:0014009	glial cell proliferation	1/80	45/15278	0.210688	0.380028	0.347757	ETV5	1
GO:0014075	response to amine	1/80	45/15278	0.210688	0.380028	0.347757	NME1	1
GO:0015695	organic cation transport	1/80	45/15278	0.210688	0.380028	0.347757	SLC38A2	1
GO:0030857	negative regulation of epithelial cell differentiation	1/80	45/15278	0.210688	0.380028	0.347757	CITED1	1
GO:0031279	regulation of cyclase activity	1/80	45/15278	0.210688	0.380028	0.347757	GABBR2	1
GO:0032715	negative regulation of interleukin-6 production	1/80	45/15278	0.210688	0.380028	0.347757	GBA	1
GO:0033628	regulation of cell adhesion mediated by integrin	1/80	45/15278	0.210688	0.380028	0.347757	RET	1
GO:0050999	regulation of nitric-oxide synthase activity	1/80	45/15278	0.210688	0.380028	0.347757	GLA	1
GO:0070671	response to interleukin-12	1/80	45/15278	0.210688	0.380028	0.347757	P4HB	1
GO:0071825	protein-lipid complex subunit organization	1/80	45/15278	0.210688	0.380028	0.347757	P4HB	1
GO:0043409	negative regulation of MAPK cascade	2/80	164/15278	0.212035	0.381329	0.348947	C1QL4/GBA	2
GO:0048639	positive regulation of developmental growth	2/80	164/15278	0.212035	0.381329	0.348947	UNC13A/SYT4	2
GO:0051897	positive regulation of protein kinase B signaling	2/80	164/15278	0.212035	0.381329	0.348947	RET/IGFBP5	2
GO:0006111	regulation of gluconeogenesis	1/80	46/15278	0.214833	0.381766	0.349347	SIK1	1
GO:0016574	histone ubiquitination	1/80	46/15278	0.214833	0.381766	0.349347	USP22	1
GO:0043039	tRNA aminoacylation	1/80	46/15278	0.214833	0.381766	0.349347	TARS1	1
GO:0045646	regulation of erythrocyte differentiation	1/80	46/15278	0.214833	0.381766	0.349347	ACVR1B	1
GO:0045744	negative regulation of G protein-coupled receptor signaling pathway	1/80	46/15278	0.214833	0.381766	0.349347	OPRL1	1
GO:0048512	circadian behavior	1/80	46/15278	0.214833	0.381766	0.349347	OPRL1	1
GO:0070169	positive regulation of biomineral tissue development	1/80	46/15278	0.214833	0.381766	0.349347	ATF4	1
GO:0099054	presynapse assembly	1/80	46/15278	0.214833	0.381766	0.349347	LRRC4B	1
GO:0110151	positive regulation of biomineralization	1/80	46/15278	0.214833	0.381766	0.349347	ATF4	1
GO:0120163	negative regulation of cold-induced thermogenesis	1/80	46/15278	0.214833	0.381766	0.349347	ATF4	1
GO:1900271	regulation of long-term synaptic potentiation	1/80	46/15278	0.214833	0.381766	0.349347	ADCY8	1
GO:2000142	regulation of DNA-templated transcription, initiation	1/80	46/15278	0.214833	0.381766	0.349347	THRA	1
GO:0007409	axonogenesis	4/80	455/15278	0.215296	0.381766	0.349347	LRTM2/RET/PLXNA4/EFNA3	4
GO:0035725	sodium ion transmembrane transport	2/80	166/15278	0.215875	0.381766	0.349347	SLC3A2/SLC20A1	2
GO:0044272	sulfur compound biosynthetic process	2/80	166/15278	0.215875	0.381766	0.349347	GLCE/CHAC1	2
GO:2001257	regulation of cation channel activity	2/80	166/15278	0.215875	0.381766	0.349347	KCNAB1/OPRL1	2
GO:0071214	cellular response to abiotic stimulus	3/80	307/15278	0.217261	0.381766	0.349347	CRYAB/SLC38A2/ATF4	3
GO:0104004	cellular response to environmental stimulus	3/80	307/15278	0.217261	0.381766	0.349347	CRYAB/SLC38A2/ATF4	3
GO:0001659	temperature homeostasis	2/80	167/15278	0.217798	0.381766	0.349347	THRA/ATF4	2
GO:0051048	negative regulation of secretion	2/80	167/15278	0.217798	0.381766	0.349347	ERP29/SYT4	2
GO:0006654	phosphatidic acid biosynthetic process	1/80	47/15278	0.218957	0.381766	0.349347	ABHD8	1
GO:0007622	rhythmic behavior	1/80	47/15278	0.218957	0.381766	0.349347	OPRL1	1
GO:0009066	aspartate family amino acid metabolic process	1/80	47/15278	0.218957	0.381766	0.349347	ATF4	1
GO:0009311	oligosaccharide metabolic process	1/80	47/15278	0.218957	0.381766	0.349347	GLA	1
GO:0021545	cranial nerve development	1/80	47/15278	0.218957	0.381766	0.349347	PLXNA4	1
GO:0042551	neuron maturation	1/80	47/15278	0.218957	0.381766	0.349347	RET	1
GO:0043038	amino acid activation	1/80	47/15278	0.218957	0.381766	0.349347	TARS1	1
GO:0045599	negative regulation of fat cell differentiation	1/80	47/15278	0.218957	0.381766	0.349347	C1QL4	1
GO:0046460	neutral lipid biosynthetic process	1/80	47/15278	0.218957	0.381766	0.349347	SIK1	1
GO:0046463	acylglycerol biosynthetic process	1/80	47/15278	0.218957	0.381766	0.349347	SIK1	1
GO:0051339	regulation of lyase activity	1/80	47/15278	0.218957	0.381766	0.349347	GABBR2	1
GO:0061001	regulation of dendritic spine morphogenesis	1/80	47/15278	0.218957	0.381766	0.349347	LRP8	1
GO:0071478	cellular response to radiation	2/80	168/15278	0.219722	0.382735	0.350234	CRYAB/ATF4	2
GO:0051055	negative regulation of lipid biosynthetic process	1/80	48/15278	0.22306	0.387074	0.354204	SIK1	1
GO:0072132	mesenchyme morphogenesis	1/80	48/15278	0.22306	0.387074	0.354204	HEYL	1
GO:1902893	regulation of pri-miRNA transcription by RNA polymerase II	1/80	48/15278	0.22306	0.387074	0.354204	FOS	1
GO:2001238	positive regulation of extrinsic apoptotic signaling pathway	1/80	48/15278	0.22306	0.387074	0.354204	RET	1
GO:0006986	response to unfolded protein	2/80	170/15278	0.223575	0.387234	0.354351	CHAC1/ATF4	2
GO:0007416	synapse assembly	2/80	170/15278	0.223575	0.387234	0.354351	LRTM2/LRRC4B	2
GO:0043010	camera-type eye development	3/80	312/15278	0.224124	0.387816	0.354884	CRYAB/RET/ATF4	3
GO:0072507	divalent inorganic cation homeostasis	4/80	464/15278	0.225272	0.388262	0.355291	OPRL1/ADCY8/RYR2/ATF4	4
GO:0030324	lung development	2/80	171/15278	0.225504	0.388262	0.355291	IGFBP5/THRA	2
GO:0050796	regulation of insulin secretion	2/80	171/15278	0.225504	0.388262	0.355291	SYT9/ADCY8	2
GO:0032147	activation of protein kinase activity	3/80	314/15278	0.226881	0.388262	0.355291	RET/ERP29/ADCY8	3
GO:0019674	NAD metabolic process	1/80	49/15278	0.227141	0.388262	0.355291	ALDOC	1
GO:0033059	cellular pigmentation	1/80	49/15278	0.227141	0.388262	0.355291	CD63	1
GO:0045912	negative regulation of carbohydrate metabolic process	1/80	49/15278	0.227141	0.388262	0.355291	SIK1	1
GO:0046473	phosphatidic acid metabolic process	1/80	49/15278	0.227141	0.388262	0.355291	ABHD8	1
GO:0050435	amyloid-beta metabolic process	1/80	49/15278	0.227141	0.388262	0.355291	UNC13A	1
GO:0060711	labyrinthine layer development	1/80	49/15278	0.227141	0.388262	0.355291	CITED1	1
GO:0071398	cellular response to fatty acid	1/80	49/15278	0.227141	0.388262	0.355291	NME1	1
GO:0099172	presynapse organization	1/80	49/15278	0.227141	0.388262	0.355291	LRRC4B	1
GO:2000351	regulation of endothelial cell apoptotic process	1/80	49/15278	0.227141	0.388262	0.355291	SCG2	1
GO:0001655	urogenital system development	3/80	315/15278	0.228262	0.389815	0.356712	CITED1/RET/HEYL	3
GO:1905330	regulation of morphogenesis of an epithelium	2/80	173/15278	0.229365	0.39118	0.357962	CITED1/ETV5	2
GO:0001541	ovarian follicle development	1/80	50/15278	0.231201	0.39118	0.357962	VGF	1
GO:0003179	heart valve morphogenesis	1/80	50/15278	0.231201	0.39118	0.357962	HEYL	1
GO:0006984	ER-nucleus signaling pathway	1/80	50/15278	0.231201	0.39118	0.357962	ATF4	1
GO:0009161	ribonucleoside monophosphate metabolic process	1/80	50/15278	0.231201	0.39118	0.357962	UCK2	1
GO:0043949	regulation of cAMP-mediated signaling	1/80	50/15278	0.231201	0.39118	0.357962	OPRL1	1
GO:0044273	sulfur compound catabolic process	1/80	50/15278	0.231201	0.39118	0.357962	CHAC1	1
GO:0061614	pri-miRNA transcription by RNA polymerase II	1/80	50/15278	0.231201	0.39118	0.357962	FOS	1
GO:0071320	cellular response to cAMP	1/80	50/15278	0.231201	0.39118	0.357962	IGFBP5	1
GO:1900024	regulation of substrate adhesion-dependent cell spreading	1/80	50/15278	0.231201	0.39118	0.357962	P4HB	1
GO:0048638	regulation of developmental growth	3/80	318/15278	0.232416	0.392873	0.359511	PLXNA4/UNC13A/SYT4	3
GO:0008361	regulation of cell size	2/80	175/15278	0.233231	0.393161	0.359774	RET/PLXNA4	2
GO:0030323	respiratory tube development	2/80	175/15278	0.233231	0.393161	0.359774	IGFBP5/THRA	2
GO:2000377	regulation of reactive oxygen species metabolic process	2/80	175/15278	0.233231	0.393161	0.359774	CRYAB/GLA	2
GO:0043405	regulation of MAP kinase activity	3/80	319/15278	0.233804	0.393284	0.359887	RET/ERP29/GBA	3
GO:0034249	negative regulation of cellular amide metabolic process	2/80	176/15278	0.235166	0.393284	0.359887	IGFBP5/ATF4	2
GO:0061138	morphogenesis of a branching epithelium	2/80	176/15278	0.235166	0.393284	0.359887	CITED1/ETV5	2
GO:0003229	ventricular cardiac muscle tissue development	1/80	51/15278	0.235239	0.393284	0.359887	RYR2	1
GO:0043489	RNA stabilization	1/80	51/15278	0.235239	0.393284	0.359887	TENT5A	1
GO:0050819	negative regulation of coagulation	1/80	51/15278	0.235239	0.393284	0.359887	ANXA5	1
GO:0086002	cardiac muscle cell action potential involved in contraction	1/80	51/15278	0.235239	0.393284	0.359887	RYR2	1
GO:0086065	cell communication involved in cardiac conduction	1/80	51/15278	0.235239	0.393284	0.359887	RYR2	1
GO:1902373	negative regulation of mRNA catabolic process	1/80	51/15278	0.235239	0.393284	0.359887	TENT5A	1
GO:0030308	negative regulation of cell growth	2/80	177/15278	0.237101	0.396035	0.362404	CRYAB/ACVR1B	2
GO:0016042	lipid catabolic process	3/80	322/15278	0.237977	0.397134	0.36341	GLA/GBA/THRA	3
GO:0048871	multicellular organismal homeostasis	4/80	476/15278	0.238761	0.39782	0.364038	ADCY8/GBA/THRA/ATF4	4
GO:1901136	carbohydrate derivative catabolic process	2/80	178/15278	0.239038	0.39782	0.364038	GLA/GBA	2
GO:1900408	negative regulation of cellular response to oxidative stress	1/80	52/15278	0.239257	0.39782	0.364038	ATF4	1
GO:1903202	negative regulation of oxidative stress-induced cell death	1/80	52/15278	0.239257	0.39782	0.364038	ATF4	1
GO:0046942	carboxylic acid transport	3/80	324/15278	0.240766	0.399586	0.365654	SLC38A2/SLC3A2/SYT4	3
GO:0006164	purine nucleotide biosynthetic process	2/80	179/15278	0.240975	0.399586	0.365654	ADCY8/NME1	2
GO:0007219	Notch signaling pathway	2/80	179/15278	0.240975	0.399586	0.365654	HEYL/CHAC1	2
GO:0050770	regulation of axonogenesis	2/80	180/15278	0.242914	0.400101	0.366125	RET/PLXNA4	2
GO:0001755	neural crest cell migration	1/80	53/15278	0.243254	0.400101	0.366125	RET	1
GO:0007566	embryo implantation	1/80	53/15278	0.243254	0.400101	0.366125	ACVR1B	1
GO:0009206	purine ribonucleoside triphosphate biosynthetic process	1/80	53/15278	0.243254	0.400101	0.366125	NME1	1
GO:0010830	regulation of myotube differentiation	1/80	53/15278	0.243254	0.400101	0.366125	SIK1	1
GO:0018208	peptidyl-proline modification	1/80	53/15278	0.243254	0.400101	0.366125	P4HB	1
GO:0019320	hexose catabolic process	1/80	53/15278	0.243254	0.400101	0.366125	ALDOC	1
GO:0046686	response to cadmium ion	1/80	53/15278	0.243254	0.400101	0.366125	FOS	1
GO:0061005	cell differentiation involved in kidney development	1/80	53/15278	0.243254	0.400101	0.366125	CITED1	1
GO:0051480	regulation of cytosolic calcium ion concentration	3/80	326/15278	0.243561	0.400246	0.366257	OPRL1/ADCY8/RYR2	3
GO:0015849	organic acid transport	3/80	327/15278	0.244961	0.402184	0.368031	SLC38A2/SLC3A2/SYT4	3
GO:0001954	positive regulation of cell-matrix adhesion	1/80	54/15278	0.247231	0.402658	0.368465	CDH13	1
GO:0009145	purine nucleoside triphosphate biosynthetic process	1/80	54/15278	0.247231	0.402658	0.368465	NME1	1
GO:0046148	pigment biosynthetic process	1/80	54/15278	0.247231	0.402658	0.368465	CITED1	1
GO:0048662	negative regulation of smooth muscle cell proliferation	1/80	54/15278	0.247231	0.402658	0.368465	IGFBP5	1
GO:0051926	negative regulation of calcium ion transport	1/80	54/15278	0.247231	0.402658	0.368465	OPRL1	1
GO:0060688	regulation of morphogenesis of a branching structure	1/80	54/15278	0.247231	0.402658	0.368465	ETV5	1
GO:0061178	regulation of insulin secretion involved in cellular response to glucose stimulus	1/80	54/15278	0.247231	0.402658	0.368465	ADCY8	1
GO:1901862	negative regulation of muscle tissue development	1/80	54/15278	0.247231	0.402658	0.368465	IGFBP5	1
GO:1902883	negative regulation of response to oxidative stress	1/80	54/15278	0.247231	0.402658	0.368465	ATF4	1
GO:0043112	receptor metabolic process	2/80	183/15278	0.248733	0.404419	0.370076	CD63/SFRP4	2
GO:0040013	negative regulation of locomotion	3/80	330/15278	0.249168	0.404419	0.370076	IGFBP5/PTPRT/CITED2	3
GO:0042445	hormone metabolic process	2/80	184/15278	0.250674	0.404419	0.370076	PCSK1/PCSK2	2
GO:0001937	negative regulation of endothelial cell proliferation	1/80	55/15278	0.251187	0.404419	0.370076	SCG2	1
GO:0002763	positive regulation of myeloid leukocyte differentiation	1/80	55/15278	0.251187	0.404419	0.370076	FOS	1
GO:0006576	cellular biogenic amine metabolic process	1/80	55/15278	0.251187	0.404419	0.370076	SAT1	1
GO:0010332	response to gamma radiation	1/80	55/15278	0.251187	0.404419	0.370076	CRYAB	1
GO:0035306	positive regulation of dephosphorylation	1/80	55/15278	0.251187	0.404419	0.370076	GBA	1
GO:0043113	receptor clustering	1/80	55/15278	0.251187	0.404419	0.370076	ETV5	1
GO:0043525	positive regulation of neuron apoptotic process	1/80	55/15278	0.251187	0.404419	0.370076	ATF4	1
GO:0046128	purine ribonucleoside metabolic process	1/80	55/15278	0.251187	0.404419	0.370076	NME1	1
GO:0072577	endothelial cell apoptotic process	1/80	55/15278	0.251187	0.404419	0.370076	SCG2	1
GO:1901016	regulation of potassium ion transmembrane transporter activity	1/80	55/15278	0.251187	0.404419	0.370076	KCNAB1	1
GO:0051271	negative regulation of cellular component movement	3/80	332/15278	0.251979	0.405292	0.370876	IGFBP5/PTPRT/CITED2	3
GO:0006888	endoplasmic reticulum to Golgi vesicle-mediated transport	2/80	185/15278	0.252615	0.405292	0.370876	TMED3/KDELR2	2
GO:0009755	hormone-mediated signaling pathway	2/80	185/15278	0.252615	0.405292	0.370876	HEYL/THRA	2
GO:0019933	cAMP-mediated signaling	2/80	185/15278	0.252615	0.405292	0.370876	OPRL1/ADCY8	2
GO:0071456	cellular response to hypoxia	2/80	186/15278	0.254557	0.407171	0.372594	P4HB/CITED2	2
GO:0001658	branching involved in ureteric bud morphogenesis	1/80	56/15278	0.255122	0.407171	0.372594	CITED1	1
GO:0032387	negative regulation of intracellular transport	1/80	56/15278	0.255122	0.407171	0.372594	CRYAB	1
GO:0045428	regulation of nitric oxide biosynthetic process	1/80	56/15278	0.255122	0.407171	0.372594	GLA	1
GO:0045604	regulation of epidermal cell differentiation	1/80	56/15278	0.255122	0.407171	0.372594	SFRP4	1
GO:0061077	chaperone-mediated protein folding	1/80	56/15278	0.255122	0.407171	0.372594	PDIA4	1
GO:1903708	positive regulation of hemopoiesis	2/80	187/15278	0.2565	0.409013	0.37428	FOS/ACVR1B	2
GO:0030166	proteoglycan biosynthetic process	1/80	57/15278	0.259036	0.410553	0.375689	GLCE	1
GO:0030837	negative regulation of actin filament polymerization	1/80	57/15278	0.259036	0.410553	0.375689	FHOD3	1
GO:0050994	regulation of lipid catabolic process	1/80	57/15278	0.259036	0.410553	0.375689	THRA	1
GO:0055008	cardiac muscle tissue morphogenesis	1/80	57/15278	0.259036	0.410553	0.375689	RYR2	1
GO:0061098	positive regulation of protein tyrosine kinase activity	1/80	57/15278	0.259036	0.410553	0.375689	LRP8	1
GO:0070613	regulation of protein processing	1/80	57/15278	0.259036	0.410553	0.375689	CHAC1	1
GO:1902475	L-alpha-amino acid transmembrane transport	1/80	57/15278	0.259036	0.410553	0.375689	SLC3A2	1
GO:0009117	nucleotide metabolic process	4/80	495/15278	0.2605	0.412159	0.377159	UCK2/ADCY8/NME1/ALDOC	4
GO:0061564	axon development	4/80	495/15278	0.2605	0.412159	0.377159	LRTM2/RET/PLXNA4/EFNA3	4
GO:0031589	cell-substrate adhesion	3/80	339/15278	0.261855	0.4135	0.378386	CD63/P4HB/CDH13	3
GO:0001763	morphogenesis of a branching structure	2/80	190/15278	0.262328	0.4135	0.378386	CITED1/ETV5	2
GO:0072522	purine-containing compound biosynthetic process	2/80	190/15278	0.262328	0.4135	0.378386	ADCY8/NME1	2
GO:0032507	maintenance of protein location in cell	1/80	58/15278	0.262931	0.4135	0.378386	KDELR2	1
GO:0032768	regulation of monooxygenase activity	1/80	58/15278	0.262931	0.4135	0.378386	GLA	1
GO:0042278	purine nucleoside metabolic process	1/80	58/15278	0.262931	0.4135	0.378386	NME1	1
GO:0060393	regulation of pathway-restricted SMAD protein phosphorylation	1/80	58/15278	0.262931	0.4135	0.378386	ACVR1B	1
GO:0035966	response to topologically incorrect protein	2/80	191/15278	0.264272	0.415252	0.379989	CHAC1/ATF4	2
GO:0035637	multicellular organismal signaling	2/80	192/15278	0.266215	0.417439	0.381991	RYR2/GBA	2
GO:0003170	heart valve development	1/80	59/15278	0.266805	0.417439	0.381991	HEYL	1
GO:0043388	positive regulation of DNA binding	1/80	59/15278	0.266805	0.417439	0.381991	NME1	1
GO:1903317	regulation of protein maturation	1/80	59/15278	0.266805	0.417439	0.381991	CHAC1	1
GO:1903902	positive regulation of viral life cycle	1/80	59/15278	0.266805	0.417439	0.381991	P4HB	1
GO:0008544	epidermis development	3/80	343/15278	0.267523	0.418204	0.382691	IGFBP5/ACVR1B/SFRP4	3
GO:0002573	myeloid leukocyte differentiation	2/80	193/15278	0.268159	0.418841	0.383274	FOS/NME1	2
GO:1901888	regulation of cell junction assembly	2/80	194/15278	0.270103	0.419878	0.384222	LRTM2/LRRC4B	2
GO:0030865	cortical cytoskeleton organization	1/80	60/15278	0.270659	0.419878	0.384222	FHOD3	1
GO:0032890	regulation of organic acid transport	1/80	60/15278	0.270659	0.419878	0.384222	SYT4	1
GO:0033619	membrane protein proteolysis	1/80	60/15278	0.270659	0.419878	0.384222	RET	1
GO:0046173	polyol biosynthetic process	1/80	60/15278	0.270659	0.419878	0.384222	GBA	1
GO:0055081	anion homeostasis	1/80	60/15278	0.270659	0.419878	0.384222	SFRP4	1
GO:1900449	regulation of glutamate receptor signaling pathway	1/80	60/15278	0.270659	0.419878	0.384222	UNC13A	1
GO:1902369	negative regulation of RNA catabolic process	1/80	60/15278	0.270659	0.419878	0.384222	TENT5A	1
GO:0060389	pathway-restricted SMAD protein phosphorylation	1/80	61/15278	0.274493	0.425104	0.389005	ACVR1B	1
GO:0060997	dendritic spine morphogenesis	1/80	61/15278	0.274493	0.425104	0.389005	LRP8	1
GO:0042692	muscle cell differentiation	3/80	350/15278	0.277477	0.426319	0.390116	IGFBP5/SIK1/FHOD3	3
GO:0051651	maintenance of location in cell	2/80	198/15278	0.277876	0.426319	0.390116	KDELR2/RYR2	2
GO:0006360	transcription by RNA polymerase I	1/80	62/15278	0.278307	0.426319	0.390116	ATF4	1
GO:0030239	myofibril assembly	1/80	62/15278	0.278307	0.426319	0.390116	FHOD3	1
GO:0035924	cellular response to vascular endothelial growth factor stimulus	1/80	62/15278	0.278307	0.426319	0.390116	CD63	1
GO:0045670	regulation of osteoclast differentiation	1/80	62/15278	0.278307	0.426319	0.390116	FOS	1
GO:0046365	monosaccharide catabolic process	1/80	62/15278	0.278307	0.426319	0.390116	ALDOC	1
GO:0048278	vesicle docking	1/80	62/15278	0.278307	0.426319	0.390116	UNC13A	1
GO:0048645	animal organ formation	1/80	62/15278	0.278307	0.426319	0.390116	CITED2	1
GO:0060675	ureteric bud morphogenesis	1/80	62/15278	0.278307	0.426319	0.390116	CITED1	1
GO:0071300	cellular response to retinoic acid	1/80	62/15278	0.278307	0.426319	0.390116	RET	1
GO:1904705	regulation of vascular associated smooth muscle cell proliferation	1/80	62/15278	0.278307	0.426319	0.390116	IGFBP5	1
GO:1990874	vascular associated smooth muscle cell proliferation	1/80	62/15278	0.278307	0.426319	0.390116	IGFBP5	1
GO:0019722	calcium-mediated signaling	2/80	199/15278	0.279819	0.428276	0.391907	CDH13/RYR2	2
GO:0014743	regulation of muscle hypertrophy	1/80	63/15278	0.282102	0.430329	0.393786	IGFBP5	1
GO:0046513	ceramide biosynthetic process	1/80	63/15278	0.282102	0.430329	0.393786	GBA	1
GO:0060135	maternal process involved in female pregnancy	1/80	63/15278	0.282102	0.430329	0.393786	PAM	1
GO:0072171	mesonephric tubule morphogenesis	1/80	63/15278	0.282102	0.430329	0.393786	CITED1	1
GO:0045787	positive regulation of cell cycle	3/80	354/15278	0.283183	0.431619	0.394966	RNF112/USP22/CITED2	3
GO:0090276	regulation of peptide hormone secretion	2/80	201/15278	0.283704	0.432053	0.395363	SYT9/ADCY8	2
GO:0043523	regulation of neuron apoptotic process	2/80	202/15278	0.285646	0.43248	0.395754	CITED1/ATF4	2
GO:0007040	lysosome organization	1/80	64/15278	0.285877	0.43248	0.395754	GBA	1
GO:0009119	ribonucleoside metabolic process	1/80	64/15278	0.285877	0.43248	0.395754	NME1	1
GO:0032922	circadian regulation of gene expression	1/80	64/15278	0.285877	0.43248	0.395754	ATF4	1
GO:0034332	adherens junction organization	1/80	64/15278	0.285877	0.43248	0.395754	CDH13	1
GO:0042440	pigment metabolic process	1/80	64/15278	0.285877	0.43248	0.395754	CITED1	1
GO:0048663	neuron fate commitment	1/80	64/15278	0.285877	0.43248	0.395754	MYT1L	1
GO:0080171	lytic vacuole organization	1/80	64/15278	0.285877	0.43248	0.395754	GBA	1
GO:0033002	muscle cell proliferation	2/80	203/15278	0.287588	0.434709	0.397794	IGFBP5/CDH13	2
GO:0032535	regulation of cellular component size	3/80	358/15278	0.288901	0.43528	0.398317	RET/FHOD3/PLXNA4	3
GO:0007029	endoplasmic reticulum organization	1/80	65/15278	0.289632	0.43528	0.398317	RNF112	1
GO:0014910	regulation of smooth muscle cell migration	1/80	65/15278	0.289632	0.43528	0.398317	IGFBP5	1
GO:0030032	lamellipodium assembly	1/80	65/15278	0.289632	0.43528	0.398317	CDH13	1
GO:0030858	positive regulation of epithelial cell differentiation	1/80	65/15278	0.289632	0.43528	0.398317	SFRP4	1
GO:0071479	cellular response to ionizing radiation	1/80	65/15278	0.289632	0.43528	0.398317	CRYAB	1
GO:1903779	regulation of cardiac conduction	1/80	65/15278	0.289632	0.43528	0.398317	RYR2	1
GO:0010810	regulation of cell-substrate adhesion	2/80	205/15278	0.291469	0.437324	0.400187	P4HB/CDH13	2
GO:0030178	negative regulation of Wnt signaling pathway	2/80	205/15278	0.291469	0.437324	0.400187	CITED1/SFRP4	2
GO:0001654	eye development	3/80	360/15278	0.291764	0.437406	0.400262	CRYAB/RET/ATF4	3
GO:0038034	signal transduction in absence of ligand	1/80	66/15278	0.293367	0.439091	0.401804	RET	1
GO:0097192	extrinsic apoptotic signaling pathway in absence of ligand	1/80	66/15278	0.293367	0.439091	0.401804	RET	1
GO:0003143	embryonic heart tube morphogenesis	1/80	67/15278	0.297083	0.440939	0.403495	RYR2	1
GO:0006809	nitric oxide biosynthetic process	1/80	67/15278	0.297083	0.440939	0.403495	GLA	1
GO:0009205	purine ribonucleoside triphosphate metabolic process	1/80	67/15278	0.297083	0.440939	0.403495	NME1	1
GO:0009880	embryonic pattern specification	1/80	67/15278	0.297083	0.440939	0.403495	CITED1	1
GO:0035690	cellular response to drug	1/80	67/15278	0.297083	0.440939	0.403495	NME1	1
GO:0043900	regulation of multi-organism process	1/80	67/15278	0.297083	0.440939	0.403495	ACVR1B	1
GO:0050795	regulation of behavior	1/80	67/15278	0.297083	0.440939	0.403495	OPRL1	1
GO:0072091	regulation of stem cell proliferation	1/80	67/15278	0.297083	0.440939	0.403495	CITED1	1
GO:0086001	cardiac muscle cell action potential	1/80	67/15278	0.297083	0.440939	0.403495	RYR2	1
GO:0150076	neuroinflammatory response	1/80	67/15278	0.297083	0.440939	0.403495	ADCY8	1
GO:0019935	cyclic-nucleotide-mediated signaling	2/80	208/15278	0.297287	0.440939	0.403495	OPRL1/ADCY8	2
GO:0150063	visual system development	3/80	364/15278	0.297495	0.440939	0.403495	CRYAB/RET/ATF4	3
GO:0033627	cell adhesion mediated by integrin	1/80	68/15278	0.30078	0.44258	0.404997	RET	1
GO:0043967	histone H4 acetylation	1/80	68/15278	0.30078	0.44258	0.404997	USP22	1
GO:0051865	protein autoubiquitination	1/80	68/15278	0.30078	0.44258	0.404997	RNF112	1
GO:0061180	mammary gland epithelium development	1/80	68/15278	0.30078	0.44258	0.404997	ETV5	1
GO:0070373	negative regulation of ERK1 and ERK2 cascade	1/80	68/15278	0.30078	0.44258	0.404997	C1QL4	1
GO:0072078	nephron tubule morphogenesis	1/80	68/15278	0.30078	0.44258	0.404997	CITED1	1
GO:0086003	cardiac muscle cell contraction	1/80	68/15278	0.30078	0.44258	0.404997	RYR2	1
GO:0099518	vesicle cytoskeletal trafficking	1/80	68/15278	0.30078	0.44258	0.404997	SYT4	1
GO:1902036	regulation of hematopoietic stem cell differentiation	1/80	68/15278	0.30078	0.44258	0.404997	LMO2	1
GO:0048705	skeletal system morphogenesis	2/80	211/15278	0.303099	0.445275	0.407463	THRA/SFRP4	2
GO:0048762	mesenchymal cell differentiation	2/80	211/15278	0.303099	0.445275	0.407463	RET/HEYL	2
GO:0014823	response to activity	1/80	69/15278	0.304458	0.446151	0.408264	RYR2	1
GO:0032024	positive regulation of insulin secretion	1/80	69/15278	0.304458	0.446151	0.408264	ADCY8	1
GO:1904427	positive regulation of calcium ion transmembrane transport	1/80	69/15278	0.304458	0.446151	0.408264	RYR2	1
GO:0048880	sensory system development	3/80	369/15278	0.30467	0.446151	0.408264	CRYAB/RET/ATF4	3
GO:0017157	regulation of exocytosis	2/80	212/15278	0.305034	0.446326	0.408424	SYT9/SYT4	2
GO:0009150	purine ribonucleotide metabolic process	3/80	371/15278	0.307543	0.448325	0.410254	ADCY8/NME1/ALDOC	3
GO:0006305	DNA alkylation	1/80	70/15278	0.308117	0.448325	0.410254	FOS	1
GO:0006306	DNA methylation	1/80	70/15278	0.308117	0.448325	0.410254	FOS	1
GO:0009123	nucleoside monophosphate metabolic process	1/80	70/15278	0.308117	0.448325	0.410254	UCK2	1
GO:0019226	transmission of nerve impulse	1/80	70/15278	0.308117	0.448325	0.410254	GBA	1
GO:0060415	muscle tissue morphogenesis	1/80	70/15278	0.308117	0.448325	0.410254	RYR2	1
GO:0072088	nephron epithelium morphogenesis	1/80	70/15278	0.308117	0.448325	0.410254	CITED1	1
GO:0007188	adenylate cyclase-modulating G protein-coupled receptor signaling pathway	2/80	214/15278	0.308902	0.448755	0.410647	OPRL1/ADCY8	2
GO:0009636	response to toxic substance	2/80	214/15278	0.308902	0.448755	0.410647	FOS/ATF4	2
GO:0051259	protein complex oligomerization	2/80	215/15278	0.310835	0.449474	0.411305	RNF112/ADCY8	2
GO:0010660	regulation of muscle cell apoptotic process	1/80	71/15278	0.311756	0.449474	0.411305	ATF4	1
GO:0021954	central nervous system neuron development	1/80	71/15278	0.311756	0.449474	0.411305	PLXNA4	1
GO:0032272	negative regulation of protein polymerization	1/80	71/15278	0.311756	0.449474	0.411305	FHOD3	1
GO:0043407	negative regulation of MAP kinase activity	1/80	71/15278	0.311756	0.449474	0.411305	GBA	1
GO:0045685	regulation of glial cell differentiation	1/80	71/15278	0.311756	0.449474	0.411305	RNF112	1
GO:0046209	nitric oxide metabolic process	1/80	71/15278	0.311756	0.449474	0.411305	GLA	1
GO:1900006	positive regulation of dendrite development	1/80	71/15278	0.311756	0.449474	0.411305	LRP8	1
GO:1903524	positive regulation of blood circulation	1/80	71/15278	0.311756	0.449474	0.411305	RYR2	1
GO:0009100	glycoprotein metabolic process	3/80	374/15278	0.311855	0.449474	0.411305	GLCE/PRKCSH/RPN2	3
GO:0006446	regulation of translational initiation	1/80	72/15278	0.315377	0.450996	0.412698	ATF4	1
GO:0006487	protein N-linked glycosylation	1/80	72/15278	0.315377	0.450996	0.412698	RPN2	1
GO:0007422	peripheral nervous system development	1/80	72/15278	0.315377	0.450996	0.412698	PLXNA4	1
GO:0014909	smooth muscle cell migration	1/80	72/15278	0.315377	0.450996	0.412698	IGFBP5	1
GO:0033555	multicellular organismal response to stress	1/80	72/15278	0.315377	0.450996	0.412698	RET	1
GO:0051966	regulation of synaptic transmission, glutamatergic	1/80	72/15278	0.315377	0.450996	0.412698	UNC13A	1
GO:0061333	renal tubule morphogenesis	1/80	72/15278	0.315377	0.450996	0.412698	CITED1	1
GO:0061418	regulation of transcription from RNA polymerase II promoter in response to hypoxia	1/80	72/15278	0.315377	0.450996	0.412698	CITED2	1
GO:0072028	nephron morphogenesis	1/80	72/15278	0.315377	0.450996	0.412698	CITED1	1
GO:1900034	regulation of cellular response to heat	1/80	72/15278	0.315377	0.450996	0.412698	CRYAB	1
GO:0000422	autophagy of mitochondrion	1/80	73/15278	0.318979	0.45376	0.415227	GBA	1
GO:0014032	neural crest cell development	1/80	73/15278	0.318979	0.45376	0.415227	RET	1
GO:0034644	cellular response to UV	1/80	73/15278	0.318979	0.45376	0.415227	ATF4	1
GO:0055013	cardiac muscle cell development	1/80	73/15278	0.318979	0.45376	0.415227	FHOD3	1
GO:0061726	mitochondrion disassembly	1/80	73/15278	0.318979	0.45376	0.415227	GBA	1
GO:0072332	intrinsic apoptotic signaling pathway by p53 class mediator	1/80	73/15278	0.318979	0.45376	0.415227	AEN	1
GO:0032970	regulation of actin filament-based process	3/80	379/15278	0.319046	0.45376	0.415227	PAM/FHOD3/RYR2	3
GO:0007160	cell-matrix adhesion	2/80	220/15278	0.320482	0.455095	0.416449	CD63/CDH13	2
GO:0044242	cellular lipid catabolic process	2/80	220/15278	0.320482	0.455095	0.416449	GLA/GBA	2
GO:0033143	regulation of intracellular steroid hormone receptor signaling pathway	1/80	74/15278	0.322562	0.457338	0.418501	HEYL	1
GO:2001057	reactive nitrogen species metabolic process	1/80	74/15278	0.322562	0.457338	0.418501	GLA	1
GO:0006469	negative regulation of protein kinase activity	2/80	222/15278	0.324333	0.459492	0.420473	PTPRT/GBA	2
GO:0009144	purine nucleoside triphosphate metabolic process	1/80	75/15278	0.326126	0.459896	0.420842	NME1	1
GO:0010657	muscle cell apoptotic process	1/80	75/15278	0.326126	0.459896	0.420842	ATF4	1
GO:0043154	negative regulation of cysteine-type endopeptidase activity involved in apoptotic process	1/80	75/15278	0.326126	0.459896	0.420842	CRYAB	1
GO:0051279	regulation of release of sequestered calcium ion into cytosol	1/80	75/15278	0.326126	0.459896	0.420842	RYR2	1
GO:0071158	positive regulation of cell cycle arrest	1/80	75/15278	0.326126	0.459896	0.420842	RNF112	1
GO:0071260	cellular response to mechanical stimulus	1/80	75/15278	0.326126	0.459896	0.420842	SLC38A2	1
GO:0032088	negative regulation of NF-kappaB transcription factor activity	1/80	76/15278	0.329672	0.463824	0.424436	NWD1	1
GO:0045638	negative regulation of myeloid cell differentiation	1/80	76/15278	0.329672	0.463824	0.424436	NME1	1
GO:0060998	regulation of dendritic spine development	1/80	76/15278	0.329672	0.463824	0.424436	LRP8	1
GO:0048644	muscle organ morphogenesis	1/80	77/15278	0.3332	0.467349	0.427662	RYR2	1
GO:0048864	stem cell development	1/80	77/15278	0.3332	0.467349	0.427662	RET	1
GO:0055117	regulation of cardiac muscle contraction	1/80	77/15278	0.3332	0.467349	0.427662	RYR2	1
GO:0070542	response to fatty acid	1/80	77/15278	0.3332	0.467349	0.427662	NME1	1
GO:0051896	regulation of protein kinase B signaling	2/80	227/15278	0.333935	0.468021	0.428278	RET/IGFBP5	2
GO:0090257	regulation of muscle system process	2/80	228/15278	0.335852	0.470347	0.430406	IGFBP5/RYR2	2
GO:0001570	vasculogenesis	1/80	78/15278	0.336709	0.470826	0.430845	CITED1	1
GO:0048145	regulation of fibroblast proliferation	1/80	78/15278	0.336709	0.470826	0.430845	C1QL4	1
GO:0043542	endothelial cell migration	2/80	229/15278	0.337766	0.471944	0.431867	SCG2/CDH13	2
GO:0008016	regulation of heart contraction	2/80	230/15278	0.339679	0.473893	0.433651	RYR2/THRA	2
GO:0046777	protein autophosphorylation	2/80	230/15278	0.339679	0.473893	0.433651	SIK1/ACVR1B	2
GO:0048144	fibroblast proliferation	1/80	79/15278	0.3402	0.473896	0.433654	C1QL4	1
GO:0055006	cardiac cell development	1/80	79/15278	0.3402	0.473896	0.433654	FHOD3	1
GO:0051402	neuron apoptotic process	2/80	232/15278	0.343501	0.476918	0.436419	CITED1/ATF4	2
GO:0051924	regulation of calcium ion transport	2/80	232/15278	0.343501	0.476918	0.436419	OPRL1/RYR2	2
GO:1901617	organic hydroxy compound biosynthetic process	2/80	232/15278	0.343501	0.476918	0.436419	CITED1/GBA	2
GO:1901532	regulation of hematopoietic progenitor cell differentiation	1/80	80/15278	0.343673	0.476918	0.436419	LMO2	1
GO:1903351	cellular response to dopamine	1/80	80/15278	0.343673	0.476918	0.436419	ATF4	1
GO:0097061	dendritic spine organization	1/80	81/15278	0.347128	0.480151	0.439378	LRP8	1
GO:1903312	negative regulation of mRNA metabolic process	1/80	81/15278	0.347128	0.480151	0.439378	TENT5A	1
GO:1903350	response to dopamine	1/80	81/15278	0.347128	0.480151	0.439378	ATF4	1
GO:2000117	negative regulation of cysteine-type endopeptidase activity	1/80	81/15278	0.347128	0.480151	0.439378	CRYAB	1
GO:0070085	glycosylation	2/80	234/15278	0.347316	0.480151	0.439378	RPN2/GBA	2
GO:0001933	negative regulation of protein phosphorylation	3/80	399/15278	0.347824	0.480491	0.439689	C1QL4/PTPRT/GBA	3
GO:0007187	G protein-coupled receptor signaling pathway, coupled to cyclic nucleotide second messenger	2/80	235/15278	0.34922	0.480647	0.439831	OPRL1/ADCY8	2
GO:0006816	calcium ion transport	3/80	400/15278	0.349262	0.480647	0.439831	OPRL1/SLC3A2/RYR2	3
GO:0006029	proteoglycan metabolic process	1/80	82/15278	0.350565	0.480647	0.439831	GLCE	1
GO:0014033	neural crest cell differentiation	1/80	82/15278	0.350565	0.480647	0.439831	RET	1
GO:0032436	positive regulation of proteasomal ubiquitin-dependent protein catabolic process	1/80	82/15278	0.350565	0.480647	0.439831	GBA	1
GO:0045682	regulation of epidermis development	1/80	82/15278	0.350565	0.480647	0.439831	SFRP4	1
GO:0050772	positive regulation of axonogenesis	1/80	82/15278	0.350565	0.480647	0.439831	PLXNA4	1
GO:0060218	hematopoietic stem cell differentiation	1/80	82/15278	0.350565	0.480647	0.439831	LMO2	1
GO:0097006	regulation of plasma lipoprotein particle levels	1/80	82/15278	0.350565	0.480647	0.439831	P4HB	1
GO:0097581	lamellipodium organization	1/80	82/15278	0.350565	0.480647	0.439831	CDH13	1
GO:0015850	organic hydroxy compound transport	2/80	236/15278	0.351123	0.481052	0.440202	SYT9/SYT4	2
GO:0002028	regulation of sodium ion transport	1/80	83/15278	0.353984	0.483161	0.442132	SIK1	1
GO:0035023	regulation of Rho protein signal transduction	1/80	83/15278	0.353984	0.483161	0.442132	ARHGEF28	1
GO:0050818	regulation of coagulation	1/80	83/15278	0.353984	0.483161	0.442132	ANXA5	1
GO:0060291	long-term synaptic potentiation	1/80	83/15278	0.353984	0.483161	0.442132	ADCY8	1
GO:1905897	regulation of response to endoplasmic reticulum stress	1/80	83/15278	0.353984	0.483161	0.442132	ERP29	1
GO:0030510	regulation of BMP signaling pathway	1/80	84/15278	0.357385	0.486714	0.445383	SFRP4	1
GO:0045445	myoblast differentiation	1/80	84/15278	0.357385	0.486714	0.445383	KCNAB1	1
GO:0045833	negative regulation of lipid metabolic process	1/80	84/15278	0.357385	0.486714	0.445383	SIK1	1
GO:0033673	negative regulation of kinase activity	2/80	241/15278	0.36061	0.488051	0.446607	PTPRT/GBA	2
GO:0006163	purine nucleotide metabolic process	3/80	408/15278	0.360753	0.488051	0.446607	ADCY8/NME1/ALDOC	3
GO:0050900	leukocyte migration	3/80	408/15278	0.360753	0.488051	0.446607	RET/SCG2/SLC3A2	3
GO:0001523	retinoid metabolic process	1/80	85/15278	0.360768	0.488051	0.446607	LRP8	1
GO:0014812	muscle cell migration	1/80	85/15278	0.360768	0.488051	0.446607	IGFBP5	1
GO:0043502	regulation of muscle adaptation	1/80	85/15278	0.360768	0.488051	0.446607	IGFBP5	1
GO:0045185	maintenance of protein location	1/80	85/15278	0.360768	0.488051	0.446607	KDELR2	1
GO:0070167	regulation of biomineral tissue development	1/80	85/15278	0.360768	0.488051	0.446607	ATF4	1
GO:0110149	regulation of biomineralization	1/80	85/15278	0.360768	0.488051	0.446607	ATF4	1
GO:0045927	positive regulation of growth	2/80	242/15278	0.362502	0.490034	0.448421	UNC13A/SYT4	2
GO:0003300	cardiac muscle hypertrophy	1/80	86/15278	0.364134	0.491152	0.449444	RYR2	1
GO:0042058	regulation of epidermal growth factor receptor signaling pathway	1/80	86/15278	0.364134	0.491152	0.449444	CDH13	1
GO:0060349	bone morphogenesis	1/80	86/15278	0.364134	0.491152	0.449444	SFRP4	1
GO:0048872	homeostasis of number of cells	2/80	244/15278	0.366279	0.49368	0.451758	ACVR1B/THRA	2
GO:0001892	embryonic placenta development	1/80	87/15278	0.367483	0.49421	0.452243	CITED1	1
GO:0006497	protein lipidation	1/80	87/15278	0.367483	0.49421	0.452243	GBA	1
GO:0022600	digestive system process	1/80	87/15278	0.367483	0.49421	0.452243	OPRL1	1
GO:0060993	kidney morphogenesis	1/80	88/15278	0.370814	0.497958	0.455672	CITED1	1
GO:0061097	regulation of protein tyrosine kinase activity	1/80	88/15278	0.370814	0.497958	0.455672	LRP8	1
GO:0043406	positive regulation of MAP kinase activity	2/80	247/15278	0.371929	0.498723	0.456372	RET/ERP29	2
GO:0048863	stem cell differentiation	2/80	247/15278	0.371929	0.498723	0.456372	RET/LMO2	2
GO:0072593	reactive oxygen species metabolic process	2/80	248/15278	0.373808	0.499839	0.457393	CRYAB/GLA	2
GO:0001676	long-chain fatty acid metabolic process	1/80	89/15278	0.374127	0.499839	0.457393	PAM	1
GO:0044728	DNA methylation or demethylation	1/80	89/15278	0.374127	0.499839	0.457393	FOS	1
GO:0106027	neuron projection organization	1/80	89/15278	0.374127	0.499839	0.457393	LRP8	1
GO:1903426	regulation of reactive oxygen species biosynthetic process	1/80	89/15278	0.374127	0.499839	0.457393	GLA	1
GO:0050848	regulation of calcium-mediated signaling	1/80	90/15278	0.377424	0.502589	0.45991	CDH13	1
GO:0070301	cellular response to hydrogen peroxide	1/80	90/15278	0.377424	0.502589	0.45991	RNF112	1
GO:0072599	establishment of protein localization to endoplasmic reticulum	1/80	90/15278	0.377424	0.502589	0.45991	RYR2	1
GO:0043491	protein kinase B signaling	2/80	250/15278	0.37756	0.502589	0.45991	RET/IGFBP5	2
GO:0051091	positive regulation of DNA-binding transcription factor activity	2/80	250/15278	0.37756	0.502589	0.45991	ADCY8/LRP8	2
GO:0006942	regulation of striated muscle contraction	1/80	91/15278	0.380703	0.50457	0.461722	RYR2	1
GO:0016101	diterpenoid metabolic process	1/80	91/15278	0.380703	0.50457	0.461722	LRP8	1
GO:0042158	lipoprotein biosynthetic process	1/80	91/15278	0.380703	0.50457	0.461722	GBA	1
GO:0062014	negative regulation of small molecule metabolic process	1/80	91/15278	0.380703	0.50457	0.461722	SIK1	1
GO:0120162	positive regulation of cold-induced thermogenesis	1/80	91/15278	0.380703	0.50457	0.461722	THRA	1
GO:1901655	cellular response to ketone	1/80	91/15278	0.380703	0.50457	0.461722	ADCY8	1
GO:0045017	glycerolipid biosynthetic process	2/80	252/15278	0.381303	0.504998	0.462115	SIK1/ABHD8	2
GO:0006898	receptor-mediated endocytosis	2/80	253/15278	0.383171	0.50596	0.462995	CD63/SFRP4	2
GO:0046883	regulation of hormone secretion	2/80	253/15278	0.383171	0.50596	0.462995	SYT9/ADCY8	2
GO:0019233	sensory perception of pain	1/80	92/15278	0.383965	0.50596	0.462995	OPRL1	1
GO:0030316	osteoclast differentiation	1/80	92/15278	0.383965	0.50596	0.462995	FOS	1
GO:0048814	regulation of dendrite morphogenesis	1/80	92/15278	0.383965	0.50596	0.462995	LRP8	1
GO:1901184	regulation of ERBB signaling pathway	1/80	92/15278	0.383965	0.50596	0.462995	CDH13	1
GO:1905037	autophagosome organization	1/80	92/15278	0.383965	0.50596	0.462995	GBA	1
GO:0003012	muscle system process	3/80	425/15278	0.385076	0.507058	0.463999	CRYAB/IGFBP5/RYR2	3
GO:0001708	cell fate specification	1/80	93/15278	0.387211	0.50804	0.464898	MYT1L	1
GO:0002027	regulation of heart rate	1/80	93/15278	0.387211	0.50804	0.464898	RYR2	1
[truncated: 438 more rows]

## Sheet: c
Gene ontology (GO) of DEGs unique to camel: biological processes (BPs)										Gene ontology (GO) of DEGs unique to camel: KEGG pathways
[truncated: 2,088 more rows]
