# Supplementary material for: Transcriptomic plasticity of the hypothalamic osmoregulatory control centre of the Arabian dromedary camel
Source: Commun Biol. 2022 Sep 23;5:1008. doi: 10.1038/s42003-022-03857-0 (PMC9508118; doi:10.1038/s42003-022-03857-0)
Supplement: Supplementary file 8 — Supplementary Data S5 [file 42003_2022_3857_MOESM8_ESM.xlsx]

## Sheet: a
Gene	Region covered	Reference genome accessions (NCBI)	5’ to 3’ probe sequence	Product size (bp)
Genomic AVP	Regulatory	ASM164081v1 (GCA_001640815.1)	F: CTGCTCCACAACTCCGCGTATCAGG R: CTCCCCGTGGGCAGTTCTGGAAGTA	1908
	exons and introns	ASM164081v1 (GCA_001640815.1)	F: CTGCTTCCTCAGCCTGCTGGCCTTC R: AGCTGCACCAGCCGTAGCAGCAAGG	1900
Genomic OXT	Regulatory, exons and introns	Camdro2 (GCA_000803125.2)	F: TTTCGTTTGGAGATACCGTACA R: TGGCAGACCCTTATCTCGGT	2053

## Sheet: b
Gene	Encoded product name	Reference sequence accessions (GenBank)	5’ to 3’ probe sequence	Product size (bp)
AVP	Arginine vasopressin	OM963135	CAGGATGCCGGACACCATGCTACCTGCCTGCTTCCTCAGCCTGCTGGCCTTCACCTCGGCGTGCTACTTCCAGAACTGCCCACGGGGAGGCAAGAGGGCCATGTCCGACCTGGAGCTGAGACAGTGCCTCCCCTGCGGCCCCGGGGGCAAAGGCCGCTGCTTCGGGCCCAGCATCTGCTGCGGGGACGAGCTGGGCTGCTTCGTGGGCACGGCCGAGGCGCTGCGCTGCCAGGAGGAGAACTACCTGCCGTCGCCCTGCCAGTCCGGCCAGAAGCCGTGCGGGAGCGGGGGCCGCTGCGCCGCCGCCGGCATCTGCTGCAACGACGAGAGCTGCATGACGGAGCCCGAGTGCCGGGAGGGCGCCGGCTTCCCCCGCCGCGCCCGCGCCAGCGACCGGAG…	471
OXT	Oxytocin	OM963134	GTCGCCGGACCCCGGACCCAGCGCACCCACACCATGGCCGGCCTCAGCCTCGCCTGCTGCCTGCTCGGCCTCCTGGCGCTGACCTCCGCCTGCTACATCCAGAACTGCCCCCTGGGCGGCAAGAGGGCCGCGCTGGACCTCGACGTGCGCCAGTGCCTCCCCTGCGGCCCCGGGGGCAAAGGCCGCTGCTTCGGGCCCAGCATCTGCTGCGGGGATGAGCTGGGCTGCTTCGTGGGCACGGCCGAGGCGCTGCGCTGCCAGGAGGAGAACTACCTGCCGTCGCCCTGCCAGTCCGGCCAGAAGCCGTGCGGGAGCGGGGGCCGCTGCGCCGCCGCCGGCATCTGCTGCAGCCCCGACGGCTGCCGCGCCGAGCCCGCCTGCGACCCCGAGGCCGCCTTC…	427

## Sheet: c
Gene	Product name	Reference sequence accessions (NCBI)	5’ to 3’ primer sequence (F: forward, R: reverse)	Product size (bp)
AGT	Angiotensinogen	XM_010997954.2	F: ATGCCTACGTCCACTTCCAA R: TGACACAGAGGTGGTGTTGT	92
ATF4	Activating transcription factor 4	XM_010983554.2	F: GGCATCTGTATGAGCCCTGA R: CTATTTGGAGAGCCCCTGGT	77
ATP6V0B	ATPase H+ transporting V0 subunit B	XM_010982305.2 XM_031465620.1	F: CGCAGAACCCCAGTCTCTTT R: CACTCGGGAAGTCTGAAGGA	104
C1QB	Complement C1q B chain	XM_010979833.2	F: CCAACAGGAACTACGAGCCT R: GAGCTGGCATGGTAGGTGAA	82
CAMK2A	Calcium/calmodulin dependent protein kinase II alpha	XM_031449336.1 XM_031449338.1	F: CCTACTGGTTGGCTATCCCC R: GGTGTCCCATTCTGGTGATG	103
CCKAR	Cholecystokinin A receptor	XM_031436349.1	F: GCAGACAAAATCCCACGCTT R: CATATTCGCGGTCTGGTTGT	130
COL1A1	Collagen type I alpha 1 chain	XM_031469629.1 XM_031469630.1 XM_031469631.1	F: AGAACATCCGCAGTCCTGAA R: TTGGTTGGGGTCAATCCAGT	113
COL3A1	Collagen type III alpha 1 chain	XM_031451778.1 XM_031451779.1	F: TGAGGCTGATGGGGTCAAAT R: TTCCCCAGTGTGTTTAGTGC	101
CREM	cAMP responsive element modulator	XM_031448717.1 XM_031448718.1 XM_031448719.1 XM_031448720.1 XM_031448721.1 XM_031448722.1 XM_031448723.1 XM_031448724.1 XM_031448725.1 XM_031448726.1 XM_031448727.1 XM_031448728.1 XM_031448729.1 XM_031448730.1 XM_031448731.1 XM_031448732.1 XM_031448733.1 XM_031448734.1 XM_031448735.1 XM_031448736.1 XM_031448737.1 XM_031448738.1 XM_031448739.1 XM_031448740.1 XM_031448741.1	F: CCTACTTACCAGATCCGGGC R: ATCAGCCTCAGCTCTCGTTT	131
CTSA	Cathepsin A	XM_010978614.2 XM_010978615.2 XM_010978616.2	F: GATCCTTATGTGCGGAAGGC R: CTGTTGTAGAGACGGCGGTA	101
ERN1	Endoplasmic reticulum to nucleus signalling 1	XM_031468891.1 XM_031468892.1	F: AATGTCCCACTTCGTGTCCA R: CACCACAGGGGAAGCATAGT	100
FOS	FBJ murine osteosarcoma viral oncogene homolog	XM_010976475.2	F: ATGTCTGTGGCTTCCCTTGA R: GGTCATTTAGGAGGGGCAGG	94
FOSL2	FOS Like 2, AP-1 transcription factor subunit	XM_010991266.2 XM_031466788.1 XM_031466789.1	F: ATTGCTGGGGGCTTCTATGG R: GGGTAGGTGAAGACGAGGTT	104
GABBR2	Gamma-aminobutyric acid type B receptor subunit 2	XM_031450080.1 XM_010977466.2 XM_010977467.2	F: CAGTGGAACACAACAGAGCC R: CTGGATGTGTTCTGGGGAGT	75
GAPDH	Glyceraldehyde 3-phosphate dehydrogenase	XM_010990867.1	F: ACAGTTTCCATCCCAGACCC R: ATTGATGGTGCATGACAAGGC	72
GLP1R	Glucagon like peptide 1 receptor	XM_010977347.2	F: GGCTCCTTCGTGAATGTCAG R: CCGGCTAGAGTTGTCCTTGT	123
hnAVP	Arginine vasopressin	OM963135 (GenBank)	F: CCAATCACCAGGCTCAGTTC R: TAGGTGACTCGGCTTCCAAA	133
hnOXT	Oxytocin	OM963134 (GenBank)	F: CGCCTGCTACATCCAGAACT R: GGGGGAATCACTCAGCTCTC	140
HPRT1	Hypoxanthine phosphoribos-yltransferase 1	XM_031446174.1	F: TGGCAAAACAATGCAGACCT R: GGGTCCTTTTCACCAGCAAG	89
IRF8	Interferon regulatory factor 8	XM_031436613.1 XM_031436614.1 XM_031436615.1 XM_031436617.1	F: GTGGAGGAAGCAGGGAAGAG R: AAAGGTCTCTGGTGTGAGGC	119
Mature AVP	Arginine vasopressin	OM963135 (GenBank)	F: CTACCTGCCTGCTTCCTCAG R: CACTGTCTCAGCTCCAGGTC	107
Mature OXT	Oxytocin	OM963134 (GenBank)	F: CTGCTACATCCAGAACTGCC R: CTCATCCCCGCAGCAGAT	130
P4HB	Prolyl 4-hydroxylase subunit beta	XM_031469354.1 XM_031469355.1	F: ATCGTCATCGCCAAGATGGA R: TGTAGTCGATGACCGTCTGG	115
PCSK1	Proprotein convertase subtilisin/kexin type 1	XM_031448682.1 XM_010993965.2	F: GGAGACCTTCATGTCACCCT R: GTATCCCGCTCTCTCTCAGC	74
PDYN	Prodynorphin	XM_010988290.2 XM_010988291.2 XM_031434071.1 XM_031434072.1	F: GGAGCAGGTCAAACGCTATG R: GCCCACCTTATCCCCATCTT	97
PTPRN	Protein tyrosine phosphatase receptor type N	XM_031452217.1 XM_031452218.1 XM_031452219.1 XM_031452221.1 XM_031452222.1 XM_010988374.2	F: AGCCCTTCTCGGAGTGACTA R: TATGTAGGCTGGCATCCGTG	72
SCG2	Secretogranin II	XM_010979109.2	F: CAAATCGAGCAGGCCATCAA R: GAGCCTTTTGCTTACCGAGG	84
SELENOS	Selenoprotein S	XM_031440466.1	F: CGTCATCCCGAAACGGAAAT R: CTCTTCGTCCAGGTCTCCAG	107
SSR3	Signal sequence receptor subunit 3	XM_010986437.2 XM_031449649.1	F: TCTGTTCCTGGTCTTGGTCA R: GTAGACAGGAGGGCGATGAG	117
TLR4	Toll-like receptor 4	XM_010998309.2 XM_010998325.2 XM_031450320.1 XM_010998333.2	F: TCCCAGCACTTCATCCAGAG R: ACGACTGCTCAAAAACTGCC	78
VGF	VGF nerve growth factor inducible	XM_031432640.1	F: ACTGCGAGATTTCAGTCCGA R: CGTGCGAGTTTCTGTCTCTG	73
VIP	Vasoactive intestinal peptide	XM_010994013.2	F: ACCAGCGACTTTAGCAGACT R: GCTATGGCTGACTCGCTTTC	84
