# Supplementary material for: Transcriptomic plasticity of the hypothalamic osmoregulatory control centre of the Arabian dromedary camel
Source: Commun Biol. 2022 Sep 23;5:1008. doi: 10.1038/s42003-022-03857-0 (PMC9508118; doi:10.1038/s42003-022-03857-0)
Supplement: Supplementary file 9 — Supplementary Data S6 [file 42003_2022_3857_MOESM9_ESM.xlsx]

## Sheet: a
Two-way repeated measures (RM) ANOVA: ANOVA results						Two-way repeated measures (RM) ANOVA: Šídák's multiple comparisons test results
Table Analyzed	Control vs Water deprived					Compare each cell mean with the other cell mean in that row
Two-way RM ANOVA	Matching: Stacked					Number of families	1
Assume sphericity?	Yes					Number of comparisons per family	5
Alpha	0.05					Alpha	0.05
Source of Variation	% of total variation	P value	P value summary	Significant?		Šídák's multiple comparisons test	Predicted (LS) mean diff.	95.00% CI of diff.	Below threshold?	Summary	Adjusted P value
Time x hydration conditions	7.863	0.0034	**	Yes
Time	4.597	0.047	*	Yes		Control - Water deprived
Hydration conditions	27.96	<0.0001	****	Yes		Day 0	-5.89	-77.59 to 65.81	No	ns		0.9999
Subject	18.21	0.0063	**	Yes		Day 5	-78.44	-150.1 to -6.744	Yes	*		0.0253
						Day 10	-93.75	-165.4 to -22.05	Yes	**		0.0046
ANOVA table	SS	DF	MS	F (DFn, DFd)	P value	Day 15	-103.6	-175.3 to -31.95	Yes	**		0.0014
Time x hydration conditions	37518	4	9379	F (4, 68) = 4.359	P=0.0034	Day 20	-143.8	-215.5 to -72.11	Yes	****		<0.0001
Time	21936	4	5484	F (4, 68) = 2.549	P=0.0470
Hydration conditions	133425	1	133425	F (1, 17) = 26.11	P<0.0001
Subject	86881	17	5111	F (17, 68) = 2.375	P=0.0063	Test details	Predicted (LS) mean 1	Predicted (LS) mean 2	Predicted (LS) mean diff.	SE of diff.	N1	N2	t	DF
Residual	146322	68	2152
						Control - Water deprived
Difference between column means						Day 0	52.26	58.15	-5.89	27.29	5	14	0.2159	85
Mean of Control	45.06					Day 5	51.33	129.8	-78.44	27.29	5	14	2.875	85
Mean of Water deprived	130.2					Day 10	41.25	135	-93.75	27.29	5	14	3.435	85
Difference between means	-85.11					Day 15	47.94	151.6	-103.6	27.29	5	14	3.798	85
SE of difference	16.66					Day 20	32.5	176.3	-143.8	27.29	5	14	5.27	85
95% CI of difference	-120.2 to -49.96
Data summary
Number of columns (hydration conditions)	2
Number of rows (Time)	5
Number of subjects (Subject)	19
Number of missing values	0

## Sheet: b
one-way mixed-effects model (restricted maximum likelihood) for repeated measures					Tukey's multiple comparisons test results
Table Analyzed	Control (Day0), Water deprived (WD) (Day20), Rehydration (RH) for 72 hrs				Number of families	1
					Number of comparisons per family	36
Mixed-effects model (REML)	Matching: Across row				Alpha	0.05
Assume sphericity?	Yes
Alpha	0.05				Tukey's multiple comparisons test	Predicted (LS) mean diff.	95.00% CI of diff.	Below threshold?	Summary	Adjusted P Value
					Control (Day0) vs. WD (Day20)	-128.5	-252.7 to -4.418	Yes	*	0.0375	A-B
Fixed effect (type III)	P value	P value summary	Statistically significant (P < 0.05)?	F (DFn, DFd)	Control (Day0) vs. RH (1 hr)	-302.1	-426.3 to -178.0	Yes	****	<0.0001	A-C
Treatment (between columns)	<0.0001	****	Yes	F (8, 39) = 13.06	Control (Day0) vs. RH (5 hrs)	-227.2	-351.4 to -103.1	Yes	****	<0.0001	A-D
					Control (Day0) vs. RH (8 hrs)	-207.8	-331.9 to -83.64	Yes	****	<0.0001	A-E
Random effects	SD	Variance			Control (Day0) vs. RH (12 hrs)	-187.4	-311.5 to -63.27	Yes	***	0.0005	A-F
Individual (between rows)	38.01	1445			Control (Day0) vs. RH (24 hrs)	-119.2	-243.3 to 4.922	No	ns	0.0682	A-G
Residual	65.51	4292			Control (Day0) vs. RH (48 hrs)	-70.35	-201.1 to 60.38	No	ns	0.703	A-H
					Control (Day0) vs. RH (72 hrs)	-39.95	-164.1 to 84.18	No	ns	0.9771	A-I
Was the matching effective?					WD (Day20) vs. RH (1 hr)	-173.6	-297.7 to -49.47	Yes	**	0.0014	B-C
Chi-square, df	6.066, 1				WD (Day20) vs. RH (5 hrs)	-98.68	-222.8 to 25.44	No	ns	0.2158	B-D
P value	0.0138				WD (Day20) vs. RH (8 hrs)	-79.22	-203.3 to 44.91	No	ns	0.4915	B-E
P value summary	*				WD (Day20) vs. RH (12 hrs)	-58.85	-183.0 to 65.28	No	ns	0.8218	B-F
Is there significant matching (P < 0.05)?	Yes				WD (Day20) vs. RH (24 hrs)	9.34	-114.8 to 133.5	No	ns	>0.9999	B-G
					WD (Day20) vs. RH (48 hrs)	58.2	-72.52 to 188.9	No	ns	0.8662	B-H
Data summary					WD (Day20) vs. RH (72 hrs)	88.6	-35.53 to 212.7	No	ns	0.3432	B-I
Number of treatments (columns)	9				RH (1 hr) vs. RH (5 hrs)	74.91	-49.21 to 199.0	No	ns	0.5652	C-D
Number of subjects (rows)	6				RH (1 hr) vs. RH (8 hrs)	94.38	-29.75 to 218.5	No	ns	0.2655	C-E
Number of missing values	1				RH (1 hr) vs. RH (12 hrs)	114.7	-9.379 to 238.9	No	ns	0.0894	C-F
					RH (1 hr) vs. RH (24 hrs)	182.9	58.81 to 307.1	Yes	***	0.0006	C-G
					RH (1 hr) vs. RH (48 hrs)	231.8	101.1 to 362.5	Yes	****	<0.0001	C-H
					RH (1 hr) vs. RH (72 hrs)	262.2	138.1 to 386.3	Yes	****	<0.0001	C-I
					RH (1 hr) vs. RH (8 hrs)	19.46	-104.7 to 143.6	No	ns	0.9998	D-E
					RH (5 hrs) vs. RH (12 hrs)	39.83	-84.29 to 164.0	No	ns	0.9775	D-F
					RH (5 hrs) vs. RH (24 hrs)	108	-16.10 to 232.1	No	ns	0.1318	D-G
					RH (5 hrs) vs. RH (48 hrs)	156.9	26.16 to 287.6	Yes	**	0.009	D-H
					RH (5 hrs) vs. RH (72 hrs)	187.3	63.15 to 311.4	Yes	***	0.0005	D-I
					RH (8 hrs) vs. RH (12 hrs)	20.37	-103.8 to 144.5	No	ns	0.9998	E-F
					RH (8 hrs) vs. RH (24 hrs)	88.56	-35.57 to 212.7	No	ns	0.3437	E-G
					RH (8 hrs) vs. RH (48 hrs)	137.4	6.696 to 268.1	Yes	*	0.0329	E-H
					RH (8 hrs) vs. RH (72 hrs)	167.8	43.69 to 291.9	Yes	**	0.0021	E-I
					RH (12 hrs) vs. RH (24 hrs)	68.19	-55.94 to 192.3	No	ns	0.68	F-G
					RH (12 hrs) vs. RH (48 hrs)	117	-13.67 to 247.8	No	ns	0.1105	F-H
					RH (12 hrs) vs. RH (72 hrs)	147.4	23.32 to 271.6	Yes	*	0.01	F-I
					RH (24 hrs) vs. RH (48 hrs)	48.86	-81.86 to 179.6	No	ns	0.9455	G-H
					RH (24 hrs) vs. 7 day ReHyd	79.26	-44.87 to 203.4	No	ns	0.4909	G-I
					RH (48 hrs) vs. RH (72 hrs)	30.4	-100.3 to 161.1	No	ns	0.9973	H-I
					Test details	Predicted (LS) mean 1	Predicted (LS) mean 2	Predicted (LS) mean diff.	SE of diff.	n1	n2	q	DF
					Control (Day0) vs. WD (Day20)	73.03	201.6	-128.5	37.82	6	6	4.806	39
					Control (Day0) vs. RH (1 hr)	73.03	375.2	-302.1	37.82	6	6	11.3	39
					Control (Day0) vs. RH (5 hrs)	73.03	300.3	-227.2	37.82	6	6	8.496	39
					Control (Day0) vs. RH (8 hrs)	73.03	280.8	-207.8	37.82	6	6	7.768	39
					Control (Day0) vs. RH (12 hrs)	73.03	260.4	-187.4	37.82	6	6	7.007	39
					Control (Day0) vs. RH (24 hrs)	73.03	192.2	-119.2	37.82	6	6	4.457	39
					Control (Day0) vs. RH (48 hrs)	73.03	143.4	-70.35	39.83	6	5	2.497	39
					Control (Day0) vs. RH (72 hrs)	73.03	113	-39.95	37.82	6	6	1.494	39
					WD (Day20) vs. RH (1 hr)	201.6	375.2	-173.6	37.82	6	6	6.491	39
					WD (Day20) vs. RH (5 hrs)	201.6	300.3	-98.68	37.82	6	6	3.69	39
					WD (Day20) vs. RH (8 hrs)	201.6	280.8	-79.22	37.82	6	6	2.962	39
					WD (Day20) vs. RH (12 hrs)	201.6	260.4	-58.85	37.82	6	6	2.2	39
					WD (Day20) vs. RH (24 hrs)	201.6	192.2	9.34	37.82	6	6	0.3492	39
					WD (Day20) vs. RH (48 hrs)	201.6	143.4	58.2	39.83	6	5	2.066	39
					WD (Day20) vs. RH (72 hrs)	201.6	113	88.6	37.82	6	6	3.313	39
					RH (1 hr) vs. RH (5 hrs)	375.2	300.3	74.91	37.82	6	6	2.801	39
					RH (1 hr) vs. RH (8 hrs)	375.2	280.8	94.38	37.82	6	6	3.529	39
					RH (1 hr) vs. RH (12 hrs)	375.2	260.4	114.7	37.82	6	6	4.29	39
					RH (1 hr) vs. RH (24 hrs)	375.2	192.2	182.9	37.82	6	6	6.84	39
					RH (1 hr) vs. RH (48 hrs)	375.2	143.4	231.8	39.83	6	5	8.229	39
					RH (1 hr) vs. RH (72 hrs)	375.2	113	262.2	37.82	6	6	9.803	39
					RH (1 hr) vs. RH (8 hrs)	300.3	280.8	19.46	37.82	6	6	0.7277	39
					RH (5 hrs) vs. RH (12 hrs)	300.3	260.4	39.83	37.82	6	6	1.489	39
					RH (5 hrs) vs. RH (24 hrs)	300.3	192.2	108	37.82	6	6	4.039	39
					RH (5 hrs) vs. RH (48 hrs)	300.3	143.4	156.9	39.83	6	5	5.57	39
					RH (5 hrs) vs. RH (72 hrs)	300.3	113	187.3	37.82	6	6	7.002	39
					RH (8 hrs) vs. RH (12 hrs)	280.8	260.4	20.37	37.82	6	6	0.7616	39
					RH (8 hrs) vs. RH (24 hrs)	280.8	192.2	88.56	37.82	6	6	3.311	39
					RH (8 hrs) vs. RH (48 hrs)	280.8	143.4	137.4	39.83	6	5	4.879	39
					RH (8 hrs) vs. RH (72 hrs)	280.8	113	167.8	37.82	6	6	6.275	39
					RH (12 hrs) vs. RH (24 hrs)	260.4	192.2	68.19	37.82	6	6	2.55	39
					RH (12 hrs) vs. RH (48 hrs)	260.4	143.4	117	39.83	6	5	4.156	39
					RH (12 hrs) vs. RH (72 hrs)	260.4	113	147.4	37.82	6	6	5.513	39
					RH (24 hrs) vs. RH (48 hrs)	192.2	143.4	48.86	39.83	6	5	1.735	39
					RH (24 hrs) vs. 7 day ReHyd	192.2	113	79.26	37.82	6	6	2.963	39
					RH (48 hrs) vs. RH (72 hrs)	143.4	113	30.4	39.83	5	6	1.079	39

## Sheet: mature AVP
Brown-Forsythe and Welch ANOVA test: ANOVA results		Brown-Forsythe and Welch ANOVA test: multiple conparison results
Table Analyzed	Rostral SON_mature AVP	Number of families	1
		Number of comparisons per family	3
Brown-Forsythe ANOVA test		Alpha	0.05
F* (DFn, DFd)	22.84 (2.000, 9.096)
P value	0.0003	Dunnett's T3 multiple comparisons test	Mean Diff.	95.00% CI of diff.	Below threshold?	Summary	Adjusted P Value
P value summary	***	Control vs. Water deprived	1.117	0.2904 to 1.944	Yes	**	0.0054	A-B
Significant diff. among means (P < 0.05)?	Yes	Control vs. Rehydrated	1.226	0.4562 to 1.995	Yes	**	0.0026	A-C
		Water deprived vs. Rehydrated	0.1082	-0.4654 to 0.6818	No	ns	0.8732	B-C
Welch's ANOVA test
W (DFn, DFd)	16.71 (2.000, 7.204)	Test details	Mean 1	Mean 2	Mean Diff.	SE of diff.	n1	n2	t	DF
P value	0.002	Control vs. Water deprived	-8.304	-9.422	1.117	0.2316	5	5	4.826	7.363
P value summary	**	Control vs. Rehydrated	-8.304	-9.53	1.226	0.2039	5	5	6.012	5.524
Significant diff. among means (P < 0.05)?	Yes	Water deprived vs. Rehydrated	-9.422	-9.53	0.1082	0.1606	5	5	0.6735	6.565
Data summary
Number of treatments (columns)	3
Number of values (total)	15
Brown-Forsythe and Welch ANOVA test: ANOVA results		Brown-Forsythe and Welch ANOVA test: multiple conparison results
Table Analyzed	Caudal SON_mature AVP	Number of families	1
		Number of comparisons per family	3
Brown-Forsythe ANOVA test		Alpha	0.05
F* (DFn, DFd)	36.71 (2.000, 8.608)
P value	<0.0001	Dunnett's T3 multiple comparisons test	Mean Diff.	95.00% CI of diff.	Below threshold?	Summary	Adjusted P Value
P value summary	****	Control vs. Water deprived	1.58	0.7526 to 2.407	Yes	***	0.0005	A-B
Significant diff. among means (P < 0.05)?	Yes	Control vs. Rehydrated	1.399	0.7183 to 2.080	Yes	**	0.0011	A-C
		Water deprived vs. Rehydrated	-0.1803	-0.9582 to 0.5976	No	ns	0.7298	B-C
Welch's ANOVA test
W (DFn, DFd)	33.20 (2.000, 6.273)	Test details	Mean 1	Mean 2	Mean Diff.	SE of diff.	n1	n2	t	DF
P value	0.0005	Control vs. Water deprived	-6.985	-8.564	1.58	0.2411	5	5	6.551	7.834
P value summary	***	Control vs. Rehydrated	-6.985	-8.384	1.399	0.1667	5	5	8.393	4.94
Significant diff. among means (P < 0.05)?	Yes	Water deprived vs. Rehydrated	-8.564	-8.384	-0.1803	0.1904	5	5	0.9468	4.705
Data summary
Number of treatments (columns)	3
Number of values (total)	15

## Sheet: heteronuclear AVP
Brown-Forsythe and Welch ANOVA test: ANOVA results		Brown-Forsythe and Welch ANOVA test: multiple conparison results
Table Analyzed	Rostral SON_hnAVP	Number of families	1
		Number of comparisons per family	3
Brown-Forsythe ANOVA test		Alpha	0.05
F* (DFn, DFd)	11.89 (2.000, 8.826)
P value	0.0031	Dunnett's T3 multiple comparisons test	Mean Diff.	95.00% CI of diff.	Below threshold?	Summary	Adjusted P Value
P value summary	**	Control vs. Water deprived	1.741	0.1971 to 3.285	Yes	*	0.0154	A-B
Significant diff. among means (P < 0.05)?	Yes	Control vs. Rehydrated	1.204	0.1898 to 2.219	Yes	*	0.0107	A-C
		Water deprived vs. Rehydrated	-0.5369	-2.042 to 0.9684	No	ns	0.5323	B-C
Welch's ANOVA test
W (DFn, DFd)	14.79 (2.000, 7.242)	Test details	Mean 1	Mean 2	Mean Diff.	SE of diff.	n1	n2	t	DF
P value	0.0028	Control vs. Water deprived	6.331	4.59	1.741	0.378	5	5	4.606	5.479
P value summary	**	Control vs. Rehydrated	6.331	5.127	1.204	0.2841	5	5	4.24	6.75
Significant diff. among means (P < 0.05)?	Yes	Water deprived vs. Rehydrated	4.59	5.127	-0.5369	0.4215	5	5	1.274	7.126
Data summary
Number of treatments (columns)	3
Number of values (total)	15
Brown-Forsythe and Welch ANOVA test: ANOVA results		Brown-Forsythe and Welch ANOVA test: multiple conparison results
Table Analyzed	Caudal SON_hnAVP	Number of families	1
		Number of comparisons per family	3
Brown-Forsythe ANOVA test		Alpha	0.05
F* (DFn, DFd)	7.904 (2.000, 8.554)
P value	0.0114	Dunnett's T3 multiple comparisons test	Mean Diff.	95.00% CI of diff.	Below threshold?	Summary	Adjusted P Value
P value summary	*	Control vs. Water deprived	2.37	-0.1080 to 4.849	Yes	*	0.0311	A-B
Significant diff. among means (P < 0.05)?	Yes	Control vs. Rehydrated	1.429	-0.7182 to 3.576	No	ns	0.1059	A-C
		Water deprived vs. Rehydrated	-0.9412	-3.114 to 1.231	No	ns	0.319	B-C
Welch's ANOVA test
W (DFn, DFd)	5.045 (2.000, 6.010)	Test details	Mean 1	Mean 2	Mean Diff.	SE of diff.	n1	n2	t	DF
P value	0.0518	Control vs. Water deprived	8.09	5.72	2.37	0.7226	5	5	3.28	7.999
P value summary	ns	Control vs. Rehydrated	8.09	6.661	1.429	0.5257	5	5	2.719	4.571
Significant diff. among means (P < 0.05)?	No	Water deprived vs. Rehydrated	5.72	6.661	-0.9412	0.5318	5	5	1.77	4.557
Data summary
Number of treatments (columns)	3
Number of values (total)	15

## Sheet: mature OXT
Brown-Forsythe and Welch ANOVA test: ANOVA results		Brown-Forsythe and Welch ANOVA test: multiple conparison results
Table Analyzed	Rostral SON_mature OXT	Number of families	1
		Number of comparisons per family	3
Brown-Forsythe ANOVA test		Alpha	0.05
F* (DFn, DFd)	4.272 (2.000, 11.16)
P value	0.0419	Dunnett's T3 multiple comparisons test	Mean Diff.	95.00% CI of diff.	Below threshold?	Summary	Adjusted P Value
P value summary	*	Control vs. Water deprived	1.18	-0.4098 to 2.769	No	ns	0.0876	A-B
Significant diff. among means (P < 0.05)?	Yes	Control vs. Rehydrated	1.016	-0.5905 to 2.623	No	ns	0.1615	A-C
		Water deprived vs. Rehydrated	-0.1631	-1.519 to 1.192	No	ns	0.9652	B-C
Welch's ANOVA test
W (DFn, DFd)	3.435 (2.000, 7.866)	Test details	Mean 1	Mean 2	Mean Diff.	SE of diff.	n1	n2	t	DF
P value	0.0847	Control vs. Water deprived	-1.551	-2.73	1.18	0.445	5	5	2.651	7.257
P value summary	ns	Control vs. Rehydrated	-1.551	-2.567	1.016	0.4685	5	5	2.169	7.72
Significant diff. among means (P < 0.05)?	No	Water deprived vs. Rehydrated	-2.73	-2.567	-0.1631	0.3952	5	5	0.4128	7.851
Data summary
Number of treatments (columns)	3
Number of values (total)	15
Brown-Forsythe and Welch ANOVA test: ANOVA results		Brown-Forsythe and Welch ANOVA test: multiple conparison results
Table Analyzed	Caudal SON_mature OXT	Number of families	1
		Number of comparisons per family	3
Brown-Forsythe ANOVA test		Alpha	0.05
F* (DFn, DFd)	0.4342 (2.000, 10.91)
P value	0.6585	Dunnett's T3 multiple comparisons test	Mean Diff.	95.00% CI of diff.	Below threshold?	Summary	Adjusted P Value
P value summary	ns	Control vs. Water deprived	0.4525	-1.214 to 2.119	No	ns	0.7129	A-B
Significant diff. among means (P < 0.05)?	No	Control vs. Rehydrated	0.2942	-1.576 to 2.164	No	ns	0.9281	A-C
		Water deprived vs. Rehydrated	-0.1583	-1.809 to 1.493	No	ns	0.9793	B-C
Welch's ANOVA test
W (DFn, DFd)	0.4335 (2.000, 7.681)	Test details	Mean 1	Mean 2	Mean Diff.	SE of diff.	n1	n2	t	DF
P value	0.6632	Control vs. Water deprived	2.588	2.136	0.4525	0.4666	5	5	0.9697	6.974
P value summary	ns	Control vs. Rehydrated	2.588	2.294	0.2942	0.5452	5	5	0.5396	7.998
Significant diff. among means (P < 0.05)?	No	Water deprived vs. Rehydrated	2.136	2.294	-0.1583	0.4623	5	5	0.3425	7.028
Data summary
Number of treatments (columns)	3
Number of values (total)	15

## Sheet: heteronulcear OXT
Brown-Forsythe and Welch ANOVA test: ANOVA results		Brown-Forsythe and Welch ANOVA test: multiple conparison results
Table Analyzed	Rostral SON_hnOXT	Number of families	1
		Number of comparisons per family	3
Brown-Forsythe ANOVA test		Alpha	0.05
F* (DFn, DFd)	3.589 (2.000, 5.521)
P value	0.1003	Dunnett's T3 multiple comparisons test	Mean Diff.	95.00% CI of diff.	Below threshold?	Summary	Adjusted P Value
P value summary	ns	Control vs. Water deprived	2.517	-3.219 to 8.253	No	ns	0.2598	A-B
Significant diff. among means (P < 0.05)?	No	Control vs. Rehydrated	2.482	-2.790 to 7.753	No	ns	0.2673	A-C
		Water deprived vs. Rehydrated	-0.03558	-1.907 to 1.836	No	ns	0.9998	B-C
Welch's ANOVA test
W (DFn, DFd)	1.885 (2.000, 6.843)	Test details	Mean 1	Mean 2	Mean Diff.	SE of diff.	n1	n2	t	DF
P value	0.2228	Control vs. Water deprived	2.997	0.4795	2.517	1.242	5	5	2.027	4.413
P value summary	ns	Control vs. Rehydrated	2.997	0.5151	2.482	1.29	5	5	1.923	5.064
Significant diff. among means (P < 0.05)?	No	Water deprived vs. Rehydrated	0.4795	0.5151	-0.03558	0.5239	5	5	0.06792	6.667
Data summary
Number of treatments (columns)	3
Number of values (total)	15
Brown-Forsythe and Welch ANOVA test: ANOVA results		Brown-Forsythe and Welch ANOVA test: multiple conparison results
Table Analyzed	Caudal SON_hnOXT	Number of families	1
		Number of comparisons per family	3
Brown-Forsythe ANOVA test		Alpha	0.05
F* (DFn, DFd)	2.388 (2.000, 6.129)
P value	0.1711	Dunnett's T3 multiple comparisons test	Mean Diff.	95.00% CI of diff.	Below threshold?	Summary	Adjusted P Value
P value summary	ns	Control vs. Water deprived	2.261	-3.449 to 7.971	No	ns	0.3193	A-B
Significant diff. among means (P < 0.05)?	No	Control vs. Rehydrated	1.975	-3.183 to 7.134	No	ns	0.4468	A-C
		Water deprived vs. Rehydrated	-0.2858	-2.912 to 2.340	No	ns	0.9562	B-C
Welch's ANOVA test
W (DFn, DFd)	1.561 (2.000, 5.922)	Test details	Mean 1	Mean 2	Mean Diff.	SE of diff.	n1	n2	t	DF
P value	0.2854	Control vs. Water deprived	3.456	1.194	2.261	1.236	5	5	1.829	4.198
P value summary	ns	Control vs. Rehydrated	3.456	1.48	1.975	1.367	5	5	1.445	5.898
Significant diff. among means (P < 0.05)?	No	Water deprived vs. Rehydrated	1.194	1.48	-0.2858	0.6429	5	5	0.4446	4.777
Data summary
Number of treatments (columns)	3
Number of values (total)	15

## Sheet: AGT
Brown-Forsythe and Welch ANOVA test: ANOVA results		Brown-Forsythe and Welch ANOVA test: multiple conparison results
Table Analyzed	Rostral SON_AGT	Number of families	1
		Number of comparisons per family	3
Brown-Forsythe ANOVA test		Alpha	0.05
F* (DFn, DFd)	9.511 (2.000, 8.346)
P value	0.007	Dunnett's T3 multiple comparisons test	Mean Diff.	95.00% CI of diff.	Below threshold?	Summary	Adjusted P Value
P value summary	**	Control vs. Water deprived	1.177	0.1638 to 2.190	Yes	*	0.0127	A-B
Significant diff. among means (P < 0.05)?	Yes	Control vs. Rehydrated	1.445	-0.03845 to 2.928	Yes	*	0.0282	A-C
		Water deprived vs. Rehydrated	0.2681	-1.194 to 1.730	No	ns	0.8365	B-C
Welch's ANOVA test
W (DFn, DFd)	9.634 (2.000, 6.751)	Test details	Mean 1	Mean 2	Mean Diff.	SE of diff.	n1	n2	t	DF
P value	0.0105	Control vs. Water deprived	-2.956	-4.133	1.177	0.2684	5	5	4.384	5.802
P value summary	*	Control vs. Rehydrated	-2.956	-4.401	1.445	0.4153	5	5	3.479	7.235
Significant diff. among means (P < 0.05)?	Yes	Water deprived vs. Rehydrated	-4.133	-4.401	0.2681	0.358	5	5	0.7489	4.956
Data summary
Number of treatments (columns)	3
Number of values (total)	15
Brown-Forsythe and Welch ANOVA test: ANOVA results		Brown-Forsythe and Welch ANOVA test: multiple conparison results
Table Analyzed	Caudal SON_AGT	Number of families	1
		Number of comparisons per family	3
Brown-Forsythe ANOVA test		Alpha	0.05
F* (DFn, DFd)	10.13 (2.000, 9.460)
P value	0.0045	Dunnett's T3 multiple comparisons test	Mean Diff.	95.00% CI of diff.	Below threshold?	Summary	Adjusted P Value
P value summary	**	Control vs. Water deprived	1.515	0.05933 to 2.971	Yes	*	0.021	A-B
Significant diff. among means (P < 0.05)?	Yes	Control vs. Rehydrated	1.282	0.2887 to 2.275	Yes	**	0.0063	A-C
		Water deprived vs. Rehydrated	-0.2331	-1.670 to 1.203	No	ns	0.913	B-C
Welch's ANOVA test
W (DFn, DFd)	12.27 (2.000, 7.670)	Test details	Mean 1	Mean 2	Mean Diff.	SE of diff.	n1	n2	t	DF
P value	0.0041	Control vs. Water deprived	-2.203	-3.718	1.515	0.3858	5	5	3.928	6.281
P value summary	**	Control vs. Rehydrated	-2.203	-3.485	1.282	0.2896	5	5	4.426	7.814
Significant diff. among means (P < 0.05)?	Yes	Water deprived vs. Rehydrated	-3.718	-3.485	-0.2331	0.4022	5	5	0.5796	6.89
Data summary
Number of treatments (columns)	3
Number of values (total)	15

## Sheet: ATF4
Brown-Forsythe and Welch ANOVA test: ANOVA results		Brown-Forsythe and Welch ANOVA test: multiple conparison results
Table Analyzed	Rostral SON_ATF4	Number of families	1
		Number of comparisons per family	3
Brown-Forsythe ANOVA test		Alpha	0.05
F* (DFn, DFd)	3.683 (2.000, 9.400)
P value	0.0659	Dunnett's T3 multiple comparisons test	Mean Diff.	95.00% CI of diff.	Below threshold?	Summary	Adjusted P Value
P value summary	ns	Control vs. Water deprived	0.9156	-0.4593 to 2.290	No	ns	0.1365	A-B
Significant diff. among means (P < 0.05)?	No	Control vs. Rehydrated	0.2869	-1.077 to 1.651	No	ns	0.7786	A-C
		Water deprived vs. Rehydrated	-0.6287	-1.730 to 0.4725	No	ns	0.1871	B-C
Welch's ANOVA test
W (DFn, DFd)	2.866 (2.000, 7.015)	Test details	Mean 1	Mean 2	Mean Diff.	SE of diff.	n1	n2	t	DF
P value	0.1231	Control vs. Water deprived	-0.7946	-1.71	0.9156	0.4009	5	5	2.284	7.791
P value summary	ns	Control vs. Rehydrated	-0.7946	-1.082	0.2869	0.3339	5	5	0.8593	5.481
Significant diff. among means (P < 0.05)?	No	Water deprived vs. Rehydrated	-1.71	-1.082	-0.6287	0.2918	5	5	2.155	5.995
Data summary
Number of treatments (columns)	3
Number of values (total)	15
Brown-Forsythe and Welch ANOVA test: ANOVA results		Brown-Forsythe and Welch ANOVA test: multiple conparison results
Table Analyzed	Caudal SON_ATF4	Number of families	1
		Number of comparisons per family	3
Brown-Forsythe ANOVA test		Alpha	0.05
F* (DFn, DFd)	9.593 (2.000, 11.99)
P value	0.0033	Dunnett's T3 multiple comparisons test	Mean Diff.	95.00% CI of diff.	Below threshold?	Summary	Adjusted P Value
P value summary	**	Control vs. Water deprived	0.725	0.09089 to 1.359	Yes	*	0.0124	A-B
Significant diff. among means (P < 0.05)?	Yes	Control vs. Rehydrated	0.03305	-0.6132 to 0.6793	No	ns	0.9971	A-C
		Water deprived vs. Rehydrated	-0.6919	-1.335 to -0.04912	Yes	*	0.0172	B-C
Welch's ANOVA test
W (DFn, DFd)	9.013 (2.000, 7.998)	Test details	Mean 1	Mean 2	Mean Diff.	SE of diff.	n1	n2	t	DF
P value	0.0089	Control vs. Water deprived	0.8858	0.1608	0.725	0.1849	5	5	3.921	7.999
P value summary	**	Control vs. Rehydrated	0.8858	0.8528	0.03305	0.1884	5	5	0.1754	7.994
Significant diff. among means (P < 0.05)?	Yes	Water deprived vs. Rehydrated	0.1608	0.8528	-0.6919	0.1874	5	5	3.692	7.989
Data summary
Number of treatments (columns)	3
Number of values (total)	15

## Sheet: ATP6V0B
Brown-Forsythe and Welch ANOVA test: ANOVA results		Brown-Forsythe and Welch ANOVA test: multiple conparison results
Table Analyzed	Rostral SON_ATP6V0B	Number of families	1
		Number of comparisons per family	3
Brown-Forsythe ANOVA test		Alpha	0.05
F* (DFn, DFd)	6.285 (2.000, 11.81)
P value	0.0138	Dunnett's T3 multiple comparisons test	Mean Diff.	95.00% CI of diff.	Below threshold?	Summary	Adjusted P Value
P value summary	*	Control vs. Water deprived	1.428	0.07512 to 2.781	Yes	*	0.019	A-B
Significant diff. among means (P < 0.05)?	Yes	Control vs. Rehydrated	0.74	-0.6082 to 2.088	No	ns	0.2435	A-C
		Water deprived vs. Rehydrated	-0.6879	-2.130 to 0.7539	No	ns	0.34	B-C
Welch's ANOVA test
W (DFn, DFd)	6.106 (2.000, 7.962)	Test details	Mean 1	Mean 2	Mean Diff.	SE of diff.	n1	n2	t	DF
P value	0.0247	Control vs. Water deprived	-1.26	-2.688	1.428	0.3944	5	5	3.62	7.84
P value summary	*	Control vs. Rehydrated	-1.26	-2	0.74	0.3931	5	5	1.882	7.853
Significant diff. among means (P < 0.05)?	Yes	Water deprived vs. Rehydrated	-2.688	-2	-0.6879	0.4204	5	5	1.636	8
Data summary
Number of treatments (columns)	3
Number of values (total)	15
Brown-Forsythe and Welch ANOVA test: ANOVA results		Brown-Forsythe and Welch ANOVA test: multiple conparison results
Table Analyzed	Caudal SON_ATP6V0B	Number of families	1
		Number of comparisons per family	3
Brown-Forsythe ANOVA test		Alpha	0.05
F* (DFn, DFd)	5.082 (2.000, 10.00)
P value	0.03	Dunnett's T3 multiple comparisons test	Mean Diff.	95.00% CI of diff.	Below threshold?	Summary	Adjusted P Value
P value summary	*	Control vs. Water deprived	0.5461	-0.1439 to 1.236	No	ns	0.0645	A-B
Significant diff. among means (P < 0.05)?	Yes	Control vs. Rehydrated	0.3739	-0.1262 to 0.8739	No	ns	0.09	A-C
		Water deprived vs. Rehydrated	-0.1723	-0.8626 to 0.5181	No	ns	0.7588	B-C
Welch's ANOVA test
W (DFn, DFd)	5.413 (2.000, 7.706)	Test details	Mean 1	Mean 2	Mean Diff.	SE of diff.	n1	n2	t	DF
P value	0.034	Control vs. Water deprived	0.08346	-0.4627	0.5461	0.1828	5	5	2.987	6.494
P value summary	*	Control vs. Rehydrated	0.08346	-0.2904	0.3739	0.1458	5	5	2.564	7.736
Significant diff. among means (P < 0.05)?	Yes	Water deprived vs. Rehydrated	-0.4627	-0.2904	-0.1723	0.1933	5	5	0.8913	7.232
Data summary
Number of treatments (columns)	3
Number of values (total)	15

## Sheet: C1QB
Brown-Forsythe and Welch ANOVA test: ANOVA results		Brown-Forsythe and Welch ANOVA test: multiple conparison results
Table Analyzed	Rostral SON_C1QB	Number of families	1
		Number of comparisons per family	3
Brown-Forsythe ANOVA test		Alpha	0.05
F* (DFn, DFd)	8.289 (2.000, 8.769)
P value	0.0095	Dunnett's T3 multiple comparisons test	Mean Diff.	95.00% CI of diff.	Below threshold?	Summary	Adjusted P Value
P value summary	**	Control vs. Water deprived	1.832	0.2794 to 3.385	Yes	*	0.0128	A-B
Significant diff. among means (P < 0.05)?	Yes	Control vs. Rehydrated	0.8038	-0.9159 to 2.524	No	ns	0.2716	A-C
		Water deprived vs. Rehydrated	-1.028	-2.872 to 0.8147	No	ns	0.2331	B-C
Welch's ANOVA test
W (DFn, DFd)	11.43 (2.000, 6.358)	Test details	Mean 1	Mean 2	Mean Diff.	SE of diff.	n1	n2	t	DF
P value	0.0078	Control vs. Water deprived	-0.8954	-2.728	1.832	0.3802	5	5	4.82	5.012
P value summary	**	Control vs. Rehydrated	-0.8954	-1.699	0.8038	0.421	5	5	1.909	4.811
Significant diff. among means (P < 0.05)?	Yes	Water deprived vs. Rehydrated	-2.728	-1.699	-1.028	0.5374	5	5	1.914	7.899
Data summary
Number of treatments (columns)	3
Number of values (total)	15
Brown-Forsythe and Welch ANOVA test: ANOVA results		Brown-Forsythe and Welch ANOVA test: multiple conparison results
Table Analyzed	Caudal SON_C1QB	Number of families	1
		Number of comparisons per family	3
Brown-Forsythe ANOVA test		Alpha	0.05
F* (DFn, DFd)	11.87 (2.000, 7.551)
P value	0.0047	Dunnett's T3 multiple comparisons test	Mean Diff.	95.00% CI of diff.	Below threshold?	Summary	Adjusted P Value
P value summary	**	Control vs. Water deprived	1.503	0.1707 to 2.835	Yes	*	0.0154	A-B
Significant diff. among means (P < 0.05)?	Yes	Control vs. Rehydrated	0.7925	-0.01647 to 1.601	Yes	*	0.0273	A-C
		Water deprived vs. Rehydrated	-0.7104	-2.015 to 0.5938	No	ns	0.2323	B-C
Welch's ANOVA test
W (DFn, DFd)	14.04 (2.000, 6.733)	Test details	Mean 1	Mean 2	Mean Diff.	SE of diff.	n1	n2	t	DF
P value	0.004	Control vs. Water deprived	0.2368	-1.266	1.503	0.3261	5	5	4.608	4.775
P value summary	**	Control vs. Rehydrated	0.2368	-0.5557	0.7925	0.2143	5	5	3.697	5.948
Significant diff. among means (P < 0.05)?	Yes	Water deprived vs. Rehydrated	-1.266	-0.5557	-0.7104	0.3652	5	5	1.945	6.637
Data summary
Number of treatments (columns)	3
Number of values (total)	15

[truncated: 21 more sheets: CAMK2A, CCKAR, COL1A1, COL3A1, CREM, CTSA, FOS, GABBR2, PCSK1, PDYN, PTPRN, SCG2, VGF, ERN1, P4HB, SELENOS, SSR3, FOSL2, GLP1R, IRF8 …]
